# Supplementary material
Source: PubMed Central journal article supplement (PMC5972394)
Supplement: NIHMS967272-supplement-1.pdf [file NIHMS967272-supplement-1.pdf]

**Essential but not vulnerable: indazole sulfonamides targeting inosine monophosphate dehydrogenase as potential leads against *Mycobacterium tuberculosis***

Yumi Park<sup>a</sup>, Angela Pacitto<sup>b</sup>, Tracy Bayliss<sup>c</sup>, Laura A. T. Cleghorn<sup>c</sup>, Zhe Wang<sup>d</sup>, Travis Hartman<sup>d</sup>, Kriti Arora<sup>a</sup>, Thomas R. Ioerger<sup>e</sup>, Jim Sacchettini<sup>f</sup>, Menico Rizzi<sup>g</sup>, Stefano Donini<sup>g</sup>, Tom L. Blundell<sup>b</sup>, David B. Ascher<sup>b</sup>, Kyu Rhee<sup>d</sup>, Ardala Breda<sup>f</sup>, Nian Zhou<sup>f</sup>, Veronique Dartois<sup>h</sup>, Surendranadha Reddy Jonnala<sup>a</sup>, Laura E. Via<sup>ai</sup>, Valerie Mizrahi<sup>i</sup>, Ola Epemolu<sup>c</sup>, Laste Stojanovski<sup>c</sup>, Fred Simeons<sup>c</sup>, Maria Osuna-Cabello<sup>c</sup>, Lucy Ellis<sup>c</sup>, Claire J. MacKenzie<sup>c</sup>, Alasdair R. C. Smith<sup>c</sup>, Susan H. Davis<sup>c</sup>, Dinakaran Murugesan<sup>c</sup>, Kirsteen I. Buchanan<sup>c</sup>, Penelope A. Turner<sup>c</sup>, Margaret Huggett<sup>c</sup>, Fabio Zuccotto<sup>c</sup>, Maria Jose Rebollo-Lopez<sup>j</sup>, Maria Jose Lafuente-Monasterio<sup>j</sup>, Olalla Sanz<sup>j</sup>, Gracia Santos Diaz<sup>j</sup>, Joël Lelièvre<sup>j</sup>, Lluís Ballell<sup>j</sup>, Carolyn Selenski<sup>k</sup>, Matthew Axtman<sup>k</sup>, Sonja Ghidelli-Disse<sup>l</sup>, Hannah Pflaumer<sup>l</sup>, Markus Bösche<sup>l</sup>, Gerard Drewes<sup>l</sup>, Gail M. Freiberg<sup>m</sup>, Matthew D. Kurnick<sup>m</sup>, Myron Srikumaran<sup>m</sup>, Dale J. Kempf<sup>m</sup>, Simon R. Green<sup>c</sup>, Peter C. Ray<sup>c</sup>, Kevin Read<sup>c</sup>, Paul Wyatt<sup>c</sup>, Clifton E Barry, III<sup>ai</sup>, Helena I. Boshoff<sup>a\*</sup>

<sup>a</sup>Tuberculosis Research Section, Laboratory of Clinical Infectious Diseases, National Institute of Allergy and Infectious Disease, National Institutes of Health, Bethesda, MD20892-3206, USA; <sup>b</sup>Department of Biochemistry, University of Cambridge, Cambridge, CB2 1GA UK; <sup>c</sup>Drug Discovery Unit, College of Life Sciences, James Black Centre, University of Dundee, Dundee, DD1 5EH UK; <sup>d</sup>Division of Infectious Diseases, Department of Medicine, Weill Cornell Medical College, New York, New York 10065, USA; <sup>e</sup>Department of Computer Science and Engineering, Texas A&M University, College Station, Texas, USA; <sup>f</sup>Department of Biochemistry & Biophysics, Texas A&M University, College Station, Texas, USA; <sup>g</sup>Dipartimento di Scienze del Farmaco, University of Piemonte Orientale, Via Bovio, 6 28100 Novara, Italy; <sup>h</sup>Public Health Research Institute, New Jersey Medical School, Rutgers, The State University of New Jersey, Newark, New Jersey, USA; <sup>i</sup>MRC/NHLS/UCT Molecular Mycobacteriology Research Unit, Institute of Infectious Disease and Molecular Medicine, University of Cape Town, Rondebosch 7700, South Africa; <sup>j</sup>Diseases of the Developing World, GlaxoSmithKline, Calle Severo Ochoa 2, 28760 Tres Cantos, Madrid, Spain; <sup>k</sup>GlaxoSmithKline, 5 Crescent Dr, Philadelphia, PA 19112, USA; <sup>l</sup>Cellzome GmbH, Molecular Discovery Research, GlaxoSmithKline, Meyerhofstrasse 1, Heidelberg, Germany; <sup>m</sup>AbbVie Molecular Characterization, 1 North Waukegan Rd., N. Chicago, Illinois, USA.

---

\*Corresponding author. Tel. +1 3014519438; E-mail: [hboshoff@niaid.nih.gov](mailto:hboshoff@niaid.nih.gov)

---

**List of Supplementary Material**

**Synthesis**

## Synthesis

General Methods Chemicals and solvents were purchased from Aldrich Chemical Co., Alfa Aesar, Fluorochem, Apollo and Fisher Chemicals and were used as received, unless otherwise stated. Air- and moisture-sensitive reactions were carried out under an inert atmosphere of argon in oven-dried glassware. Analytical thin-layer chromatography (TLC) was performed on precoated TLC plates (layer 0.20 mm silica gel 60 with fluorescent indicator UV254, from Merck). Developed plates were air-dried and analysed under a UV lamp (UV 254/365 nm) and/or  $\text{KMnO}_4$  was used for visualization. Flash column chromatography was performed on an automated purification system (Teledyne ISCO Combiflash Companion or Combiflash Retrieve) using Grace Resolve prepacked silica gel cartridges (230-400 mesh, 40-63  $\mu\text{m}$ , varying sizes depending on reaction scale).  $^1\text{H}$  and  $^{13}\text{C}$  NMR spectra were recorded on a Bruker Advance II 500 spectrometer operating at 500.1 and 125.8 MHz (unless otherwise stated) using  $\text{CDCl}_3$  or  $\text{DMSO-d}_6$  solutions. Chemical shifts ( $\delta$ ) are expressed in ppm recorded using the residual solvent as the internal reference in all cases. Signal splitting patterns are described as singlet (s), doublet (d), triplet (t), multiplet (m), broadened (b) or a combination thereof. Coupling constants (J) are quoted to the nearest 0.1 Hertz (Hz). LC-MS analyses were performed with either an Agilent HPLC 1100 series connected to a Bruker Daltonics MicroTOF or and Agilent Technologies 1200 series HPLC connected to an Agilent Technologies 6130 quadrupole spectrometer, where both instruments were connected to an agilent diode array detector. LC-MS chromatographic separations were conducted with a Water Xbridge C18column, 50 mm x 2.1 mm, 3.5  $\mu\text{m}$  particle size; using either methanol, methanol/water (95:5) or water /acetonitrile (1:1) + 0.1% formic acid as the mobile phase; linear gradient from 80:20 to 5:95 over 3.5 min and then held for 1.5 min; flow rate of 0.5 mL  $\text{min}^{-1}$ . All synthesized compounds were determined to be of > 95% purity by the LC-MS method (TIC and UV) as determined using this analytical LC-MS system. High resolution electrospray measurements were performed on a Bruker MicroTof mass spectrometer. Microwave-assisted chemistry was performed using a Biotage initiator microwave synthesizer.

### *N*-(1H-indazol-6-yl)-3,5-dimethyl-1H-pyrazole-4-sulfonamide (**1**)

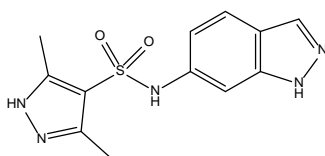

Dichloromethane (100 mL) was added to 1H-indazol-6-amine (10.9g, 81.8 mmol) resulting in a brown suspension. To the suspension was added 2,6-dimethylpyridine (22 g, 204 mmol) and the reaction mixture stirred for 5 min, after which 3, 5-dimethyl-1H-pyrazole-4-sulfonyl chloride (17.5 g, 90 mmol) was added portion wise over 20 minutes and the suspension stirred overnight at room temperature. The reaction was diluted with 10% methanol in dichloromethane (200mL) to dissolve the gum and both layers. The organics were washed with saturated NaHCO<sub>3</sub> (50 mL), which was further extracted twice with dichloromethane. The combined organics were concentrated under reduced pressure to give a gum, which was purified by flash chromatography (0-10% ethanol in DCM with ammonia) to afford an off-white solid. The solid was suspended in water 300 ml and heated to boiling, this was filtered and resulting solid washed with ice cold water then dried in a vac oven to afford 5.45g *N*-(1H-indazol-6-yl)-3,5-dimethyl-1H-pyrazole-4-sulfonamide, (5.45 g, 24%) as a solid. <sup>1</sup>H NMR (500 MHz, DMSO) δ 12.86 - 12.81 (2H, m), 10.12 (1H, s), 7.94 (1H, s), 7.61 (1H, d, J=8.7 Hz), 7.19 (1H, s), 6.87 (1H, dd, J=1.7, 8.7 Hz), 2.22 (6H, s). m/z (ES+) (M + H)<sup>+</sup> = 292.

*N*-(1H-indazol-5-yl)-3, 5-dimethyl-1H-pyrazole-4-sulfonamide (**2**)

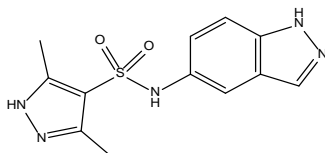

To a solution of 1H-indazol-5-amine (5 g, 37.5 mmol) in dichloromethane (42 mL) was added 3,5-dimethyl-1H-pyrazole-4-sulfonyl chloride (7.3 g, 37.5mmol) followed by 3,5-lutidine (16 g, 150.2mmol) with stirring. The reaction was stirred at room temperature overnight. The reaction was diluted with water and brine and the organics separated. The organics were then dried (sodium sulphate) filtered and concentrated in vacuo. The residue was triturated with ether and concentrated in vacuo multiple times before the residue was taken up in MeOH and loaded onto Silica. The residue was purified by automated flash chromatography (eluting with dichloromethane to 10% MeOH in dichloromethane) to afford a solid. The solid was triturated with ether and the ether removed by filtration. The solid was dissolved in MeOH at 40 °C and activated charcoal added and stirred at room temperature for 90mins. The suspension was then filtered through a pad of celite, washed with MeOH and then concentrated in vacuo to afford *N*-(1H-indazol-5-yl)-3, 5-dimethyl-1H-pyrazole-4-sulfonamide as an off-white solid, (10.9g, 19%). <sup>1</sup>H NMR (500

MHz, DMSO)  $\delta$  13.01 (1H, s), 12.75 (1H, s), 9.65 (1H, s), 8.01 (1H, s), 7.43 (1H, d,  $J=8.8$  Hz), 7.36 (1H, s), 7.08 (1H, dd,  $J=1.9, 8.8$  Hz), 2.10 (6H, s).  $m/z$  (ES+)  $(M + H)^+ = 292$  (M+H).

1H-indazol-6-yl 3,5-dimethyl-1H-pyrazole-4-sulfonate (**3**)

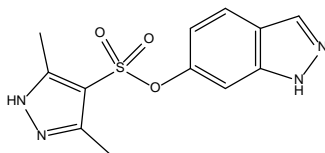

1H-indazol-6-ol (50 mg, 0.37 mmol) was dissolved in dichloromethane (3 mL) with *N,N*-diethylethanamine (45 mg, 0.45 mmol) at 0 °C and then 3,5-dimethyl-1H-pyrazole-4-sulfonyl chloride (73 mg, 0.37 mmol) added. The mixture was stirred at 0 °C for 4h and then stirred at room temperature for 16h. The product was extracted with chloroform, washed with brine and then concentrated in vacuo. The resulting residue was purified using the waters auto-prep acidic (20 - 95 %). The fractions were concentrated in vacuo to afford 1H-indazol-6-yl 3,5-dimethyl-1H-pyrazole-4-sulfonate (12 mg, 10%) as a solid.  $^1\text{H}$  NMR (500 MHz, DMSO)  $\delta$  13.26 (1H, s), 13.17 (1H, s), 8.12 (1H, s), 7.77 (1H, d,  $J=8.7$  Hz), 7.20 (1H, s), 6.78 (1H, dd,  $J=2.0, 8.7$  Hz), 2.12 (6H, s).  $m/z$  (ES+)  $(M + H)^+ = 293$ .

5-[4-(4-aminobutyl)piperazine-1-carbonyl]-N-(1H-indazol-5-yl)-2,4-dimethyl-1H-pyrrole-3-sulfonamide (**4**)

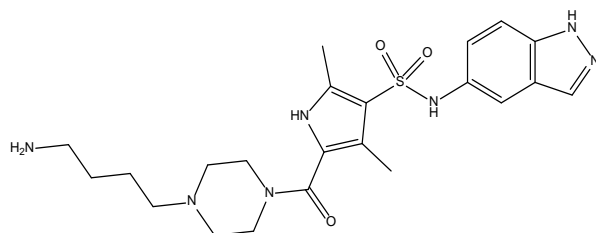

Tert-butyl N-[4-[4-[4-(1H-indazol-5-ylsulfamoyl)-3,5-dimethyl-1H-pyrrole-2-carbonyl]piperazin-1-yl]butyl]carbamate

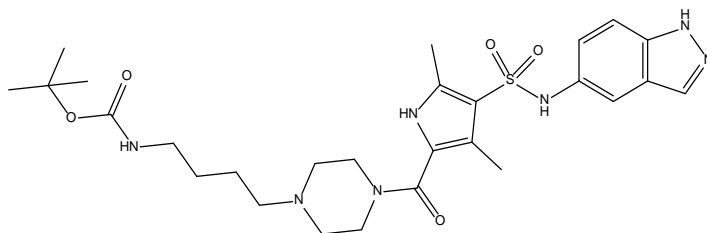

To a solution of 4-(1H-indazol-5-ylsulfamoyl)-3,5-dimethyl-1H-pyrrole-2-carboxylic acid (60 mg, 0.18 mmol) in DMF (0.3 mL) and MeCN (0.3 mL) was added EDC.HCl (41 mg, 0.22 mmol), HOAT (29 mg, 0.22 mmol), tert-butyl N-(4-piperazin-1-ylbutyl)carbamate (92 mg, 0.36 mmol) and DIPEA (0.09 mL, 0.54 mmol). After stirring for 20 h at room temperature, the solvents were removed in vacuo and the residue was purified by flash chromatography (5% MeOH in DCM) to afford a solid which was triturated with diethyl ether to afford the title compound as a white solid (22 mg, 20%).  $^1\text{H}$  NMR (500 MHz, DMSO)  $\delta$  12.99 (1H, s), 11.53 (1H, s), 9.42 (1H, s), 7.99 (1H, s), 7.40 (1H, d,  $J = 8.8$  Hz), 7.32 (1H, s), 7.06 (1H, dd,  $J = 8.8, 1.8$  Hz), 6.85 – 6.80 (1H, m), 3.27 (4H, br s), 2.95 – 2.89 (2H, m), 2.28 – 2.20 (6H, m), 2.18 (3H, s), 1.87 (3H, s), 1.42 – 1.35 (13H, m).  $m/z$  (ES+)  $(M + H)^+ = 574$  (M+H).

5-[4-(4-aminobutyl)piperazine-1-carbonyl]-N-(1H-indazol-5-yl)-2,4-dimethyl-1H-pyrrole-3-sulfonamide  
(4)

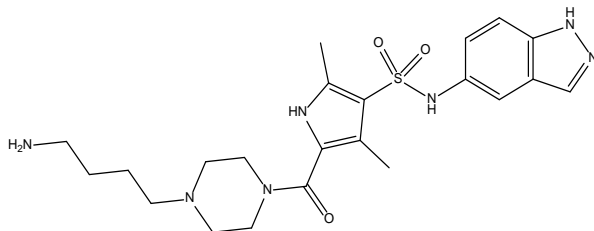

To a solution of tert-butyl N-[4-[4-[4-(1H-indazol-5-ylsulfamoyl)-3,5-dimethyl-1H-pyrrole-2-carboxyl]piperazin-1-yl]butyl]carbamate (20 mg, 0.03 mmol) in DCM (0.5 mL) was added trifluoroacetic acid (4 mg, 0.03 mmol). After stirring for 2 h at room temperature, the reaction mixture was purified using an SCX cartridge washing with MeOH and eluting the product with 3N  $\text{NH}_3$  in MeOH. The solvent was removed in vacuo to afford the title compound as an off-white solid (12 mg, 73%).  $^1\text{H}$  NMR (500 MHz, DMSO)  $\delta$  7.99 (1H, d,  $J = 0.9$ ), 7.40 (1H, d,  $J = 8.9$ ), 7.32 (1H, d,  $J = 1.8$ ), 7.05 (1H, dd,  $J = 8.9, 1.8$ ), 3.14 – 3.06 (4H, br s), 2.62 – 2.55 (2H, m), 2.26 – 2.16 (9H, m), 1.85 (3H, s), 1.48 – 1.34 (4H, m).  $m/z$  (ES+)  $(M + H)^+ = 474$  (M+H).

N-[2-[2-(2-aminoethoxy)ethoxy]ethyl]-4-(1H-indazol-5-ylsulfamoyl)-3,5-dimethyl-1H-pyrrole-2-carboxamide (**5**)

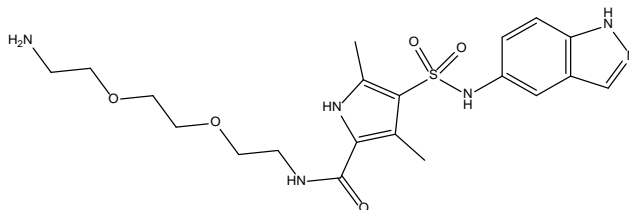

Tert-butyl N-[2-[2-[2-[4-(1H-indazol-5-ylsulfamoyl)-3,5-dimethyl-1H-pyrrole-2-carbonyl]amino]ethoxy]ethoxy]ethyl]carbamate

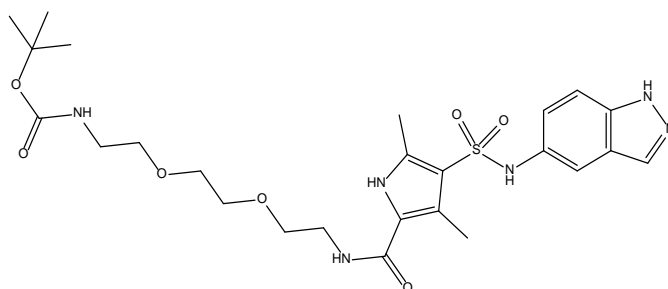

To a solution of 4-(1H-indazol-5-ylsulfamoyl)-3,5-dimethyl-1H-pyrrole-2-carboxylic acid (93 mg, 0.28 mmol) in DMF (0.3 mL) and MeCN (0.3 mL) was added EDC.HCl (64 mg, 0.33 mmol), HOAT (45 mg, 0.33 mmol), tert-butyl N-[2-[2-(2-aminoethoxy)ethoxy]ethyl]carbamate (138 mg, 0.56 mmol) and DIPEA (0.15 mL, 0.83 mmol). After stirring for 20 h at room temperature, the solvents were removed in vacuo and the residue was purified by flash chromatography (0 – 20% MeOH in DCM) to afford the title compound as a white solid (20 mg, 13%).  $m/z$  (ES+) (M + H)<sup>+</sup> = 565 (M+H).

N-[2-[2-(2-aminoethoxy)ethoxy]ethyl]-4-(1H-indazol-5-ylsulfamoyl)-3,5-dimethyl-1H-pyrrole-2-carboxamide (**5**)



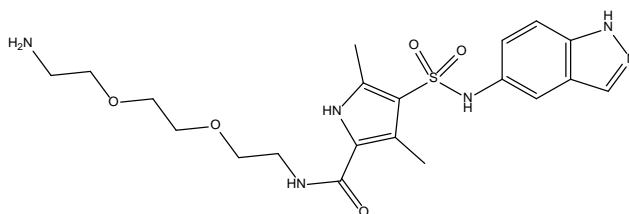

To a solution of tert-butyl N-[2-[2-[2-[[4-(1H-indazol-5-yl)sulfamoyl]-3,5-dimethyl-1H-pyrrole-2-carbonyl]amino]ethoxy]ethoxy]ethyl]carbamate (20 mg, 0.03 mmol) in DCM (0.5 mL) was added trifluoroacetic acid (4 mg, 0.03 mmol). After stirring for 2 h at room temperature, the reaction mixture was purified using an SCX cartridge washing with MeOH and eluting the product with 3N NH<sub>3</sub> in MeOH. The solvent was removed in vacuo to afford the title compound as an off-white solid (10 mg, 62%). m/z (ES+) (M + H)<sup>+</sup> = 465 (M+H).

4-(N-(1H-indazol-5-yl)sulfamoyl)-N-(4-fluorophenyl)-3,5-dimethyl-1H-pyrrole-2-carboxamide (**6**)

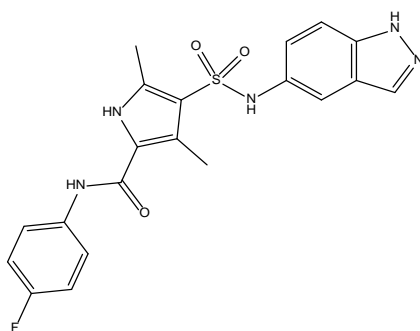

Ethyl 4-(N-(1H-indazol-5-yl)sulfamoyl)-3,5-dimethyl-1H-pyrrole-2-carboxylate

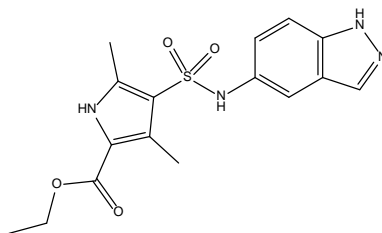

To a solution of 3, 5-lutidine (1.2 g, 11.3 mmol) and 1H-indazol-5-amine (1.5 g, 11.3 mmol) in dichloromethane (20mL) was added ethyl 4-chlorosulfonyl-3, 5-dimethyl-1H-pyrrole-2-carboxylate (3.0 g, 11.3 mmol) at 25 °C. After stirring for 20 hours, the mixture was diluted with ethyl acetate (40 mL), then washed with 5% aqueous hydrochloric acid solution (ice-cold, 25 mL) and brine (25 mL). The organic layer

was dried over  $\text{MgSO}_4$  and concentrated in vacuo to afford a solid residue. The residue was purified by flash chromatography (25–30% ethyl acetate in hexanes) to provide ethyl 4-(1H-indazol-5-ylsulfamoyl)-3,5-dimethyl-1H-pyrrole-2-carboxylate (2.99g, 73 %) as a white solid.  $^1\text{H}$  NMR (500 MHz,  $\text{DMSO-d}_6$ )  $\delta$  12.99 (1H, s), 11.86 (1H, s), 9.61 (1H, s), 8.00 (1H, s), 7.42 (1H, d,  $J=8.8$  Hz), 7.37 (1H, d,  $J=1.4$  Hz), 7.07 (1H, dd,  $J=1.9, 9.0$  Hz), 4.20 (2H, q,  $J=7.1$  Hz), 2.32 (3H, s), 2.17 (3H, s), 1.26 (3H, t,  $J=7.1$  Hz).  $m/z$  (ES+)  $(M + H)^+ = 363.1331$  (M+H).

4-(N-(1H-indazol-5-yl)sulfamoyl)-3,5-dimethyl-1H-pyrrole-2-carboxylic acid

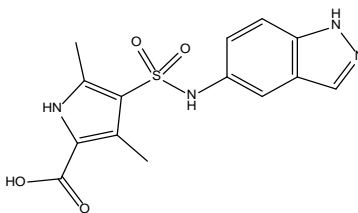

Ethyl 4-(1H-indazol-5-ylsulfamoyl)-3,5-dimethyl-1H-pyrrole-2-carboxylate (1000 mg, 2.76 mmol) was stirred in THF (10 mL) and water (10 mL) and lithium hydroxide (442 mg, 22.0 mmol) was added. The reaction mixture was heated to 70 oC overnight. A further 275 mg (13.75 mmol) of lithium hydroxide was added and heated to 70oC for 2 hours until the reaction was complete. The reaction mixture was diluted with 2N HCl (5 mL) and extracted with EtOAc (3 x 10 mL), the organics were combined and washed with water and brine, dried using a hydrophobic frit and evaporated under reduced pressure to give a dark pink solid. Trituration with hot ethyl acetate followed by filtration and overnight drying in a vacuum oven at 45 °C gave the title compound as a pale pink solid (906 mg, 89 %).  $^1\text{H}$  NMR (500 MHz,  $\text{DMSO-d}_6$ ):  $\delta$  12.97 (s, 2H), 11.78 (s, 1H), 9.57 (s, 1H), 8.00 (d,  $J=0.9$  Hz, 1H), 7.42 (d,  $J=9.0$  Hz, 1H), 7.36 (d,  $J=1.4$  Hz, 1H), 7.07 (dd,  $J=2.0, 8.8$  Hz, 1H), 2.30 (s, 3H), 2.16 (s, 3H).  $m/z$  (ES+)  $(M + H)^+ = 335.0$ ,  $(2M + H)^+ = 669.16$ .

4-(N-(1H-indazol-5-yl)sulfamoyl)-N-(4-fluorophenyl)-3,5-dimethyl-1H-pyrrole-2-carboxamide (**6**)

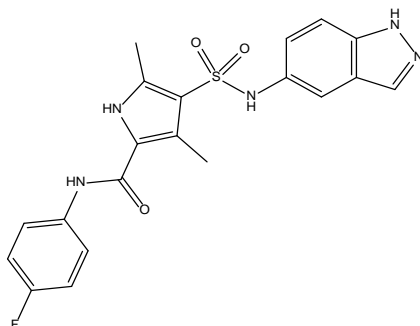

To a solution of acid of 4-(1H-indazol-5-ylsulfamoyl)-3,5-dimethyl-1H-pyrrole-2-carboxylic acid (70 mg, 0.21 mmol) in acetonitrile and DMF (3 mL, 1:1 ratio) was added HOBT (28 mg, 0.21 mmol), EDC.HCl (40 mg, 0.21 mmol) and 4-fluoroaniline (47 mg, 0.49 mmol). The mixture stirred for 30 min, then DIPEA (32 mg, 0.25 mmol) was added to the reaction mixture. The reaction mixture was stirred at room temperature overnight. The mixture was purified by pre-HPLC column chromatography eluting with 0.1 % Formic acid in MeCN / Water. The desired fractions were concentrated to dryness in vacuo, to afford N-(4-fluorophenyl)-4-(1H-indazol-5-ylsulfamoyl)-3,5-dimethyl-1H-pyrrole-2-carboxamide as a white solid (34 mg, 0.08 mmol, 37.98 % yield). <sup>1</sup>H-NMR (500 MHz, DMSO-d<sub>6</sub>): δ 12.98 (s, 1H), 11.69 - 11.69 (m, 1H), 9.65 (s, 1H), 9.57 (s, 1H), 8.00 (s, 1H), 7.64 - 7.60 (m, 2H), 7.45 - 7.40 (m, 2H), 7.17 - 7.11 (m, 3H), 2.36 (s, 3H), 2.23 (s, 3H). m/z (ES+) (M + H)<sup>+</sup> = 428.12 (M+H).

### 3, 5-Dimethyl-N-(1-methyl-1H-indazol-5-yl)-1H-pyrazole-4-sulfonamide (**7**)

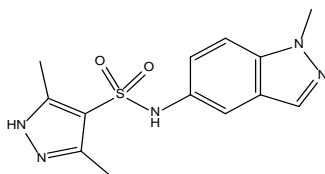

To a solution of 1-methylindazol-5-amine (400 mg, 2.7 mmol) in dichloromethane (5 mL) was added 3,5-dimethyl-1H-pyrazole-4-sulfonyl chloride (529 mg, 2.7 mmol), followed by 3, 5-lutidine (1.16 g, 10.8 mmol) with stirring. The reaction mixture was stirred at room temperature overnight then concentrated under reduced pressure to afford a residue. The residue was dissolved in acetonitrile and water (1:1) and purified by pre-HPLC column chromatography eluting with 0.1 % formic acid in acetonitrile and water. The fractions containing the desired product were passed down Si-carbonate isolate cartridge and washed through with methanol and concentration under reduced pressure gave a white solid on

(552 mg, 65%) NMR and LCMS are consistent with the desired product.  $^1\text{H}$  NMR (500 MHz, DMSO- $d_6$ ):  $\delta$  12.83 (1H, s), 10.21 (1H, s), 7.92 (1H, s), 7.60 (1H, d,  $J=8.7$  Hz), 7.17 (1H, s), 6.87 (1H, dd,  $J=1.7, 8.7$  Hz), 3.92 (3H, s), 2.26 (6H, s).  $m/z$  (ES+) ( $M + H$ ) $^+$  = 306.1 ( $M+H$ ).

### Supplementary Figure legends

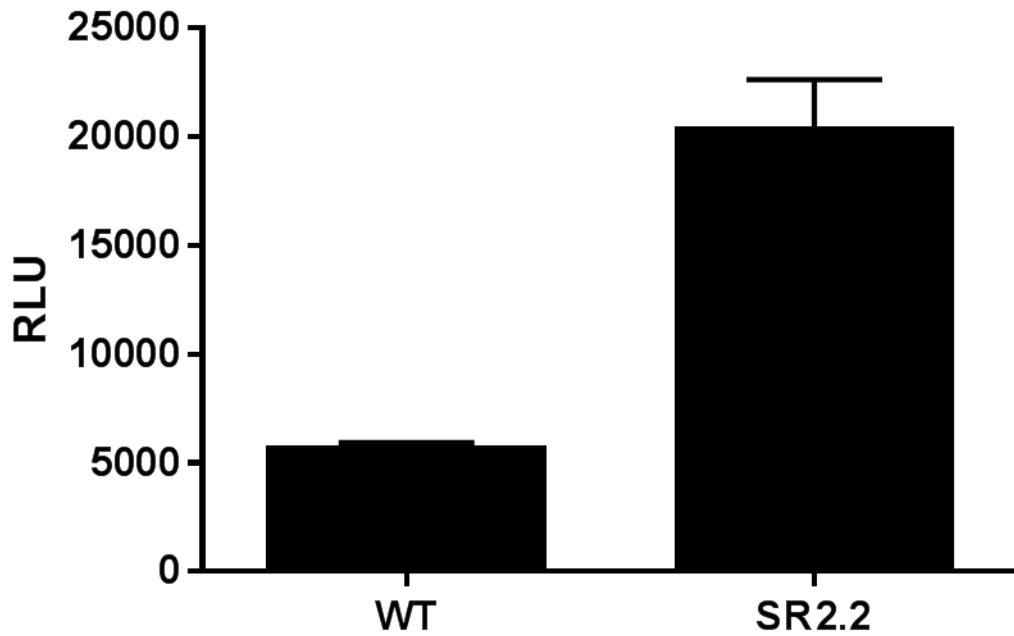

**Fig. S1. The C -> T SNP at -49bp upstream of *guaB2* causes upregulation of *guaB2* gene expression.** The wild type or mutated *guaB2* promoter was inserted upstream of the luciferase gene and expressed in *M. smegmatis*. The level of luciferase was measured by luminescence (RLU) provides a measure of basal promoter strength for the two promoter sequences.

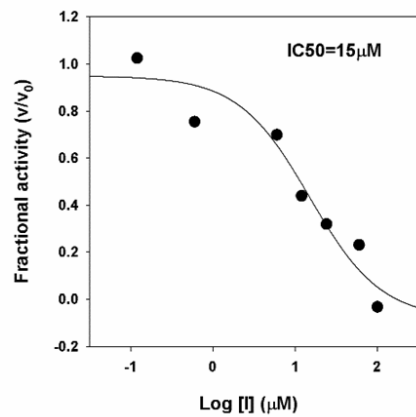

**Figure S2.** Plot of the enzyme fractional activity versus the logarithm of inhibitor concentration used to calculate IC<sub>50</sub> of compound 1 against human IMPDH.

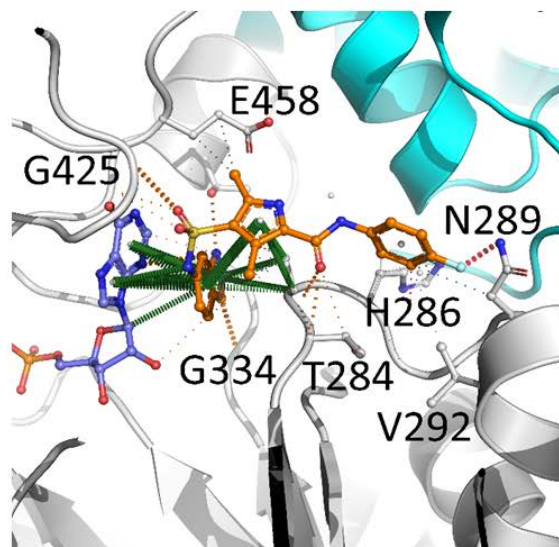

**Figure S3. Interactions made by Compound 6 (orange) in the X-ray crystal structure of the complex of IMPDH (grey; and adjacent protomer in cyan) with IMP (blue).** Residue numbering is of the corresponding residues in Mtb. Pi interactions are shown in green, hydrogen bonds in red, polar interactions in orange and proximal hydrophobic interactions in grey.

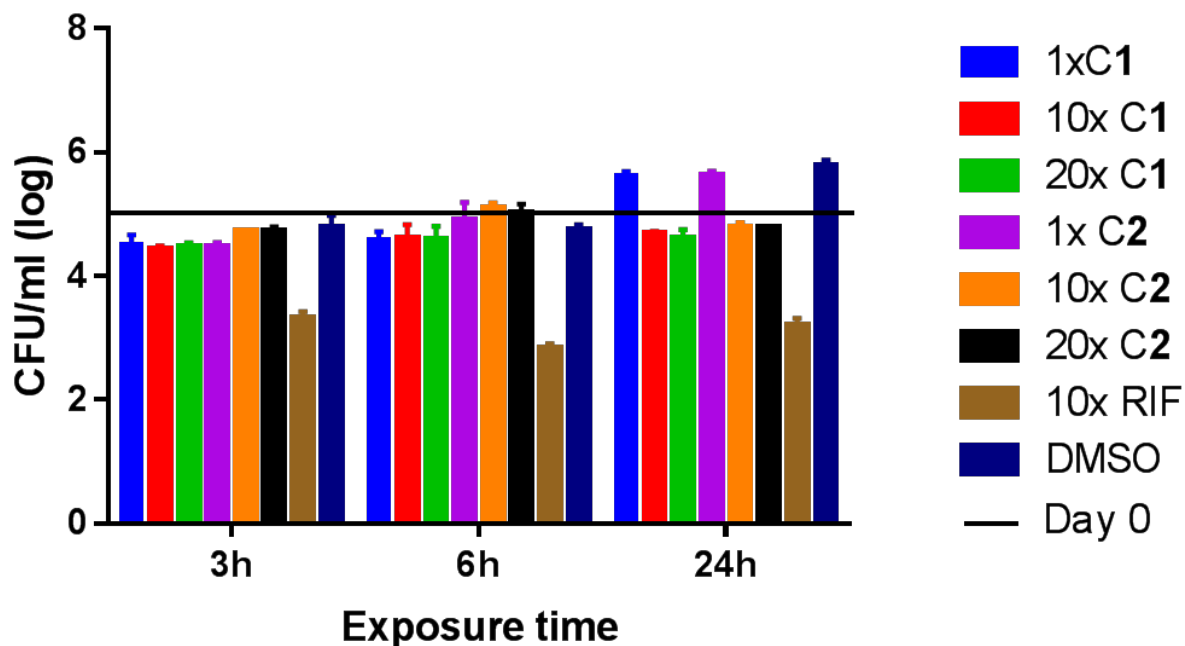

Figure S4. Extended exposure of *Mtb* to compounds 1 (C1) and 2 (C2) at 1-, 10- and 20X MIC concentrations is required to effect bacteriostasis during parasitism of host macrophages. *Mtb*-infected macrophages were exposed for 7 days to compounds for daily exposure periods of 3h, 6h or 24h followed by compound removal followed by CFU enumeration. Day 0 line shows bacterial inoculum prior to drug treatment.



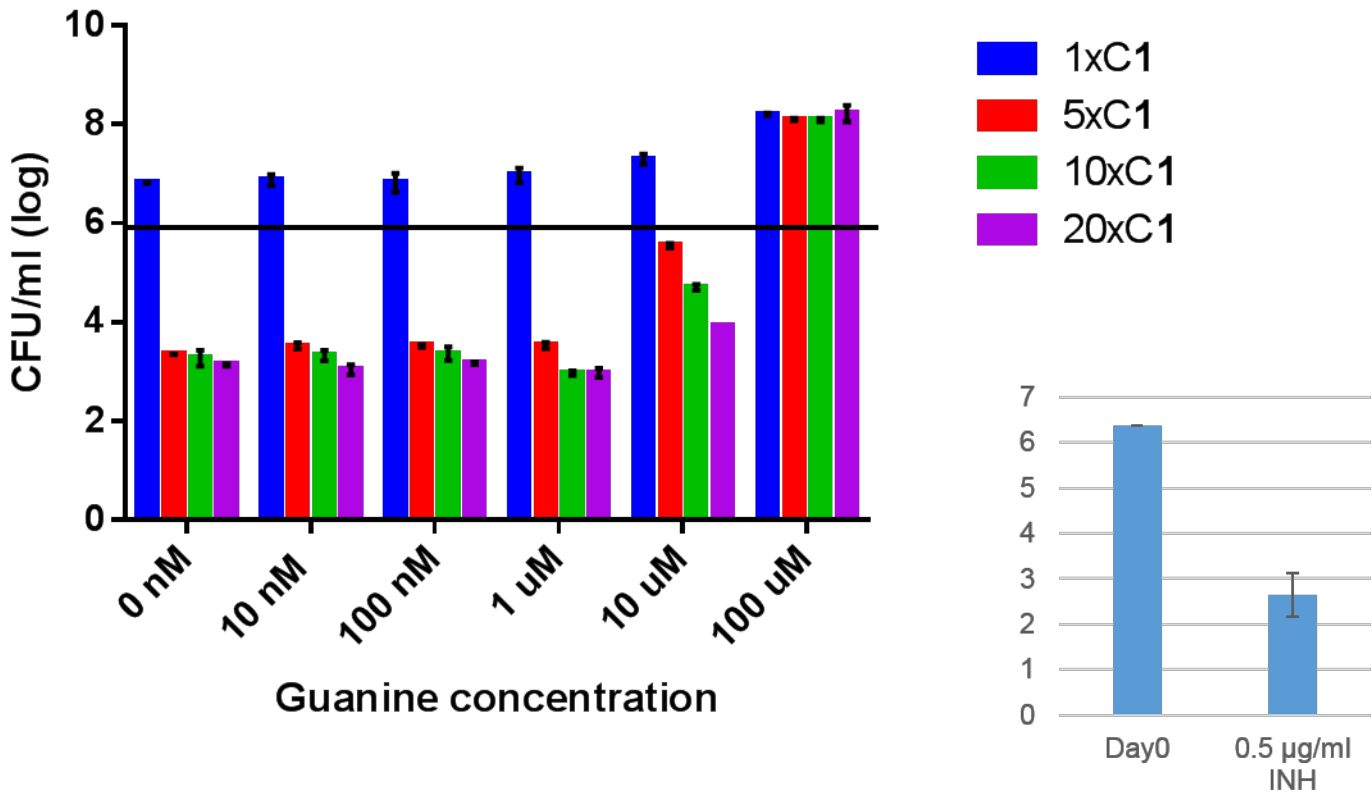

**Figure S5: Guanine rescues the cidality of an IMPDH inhibitor in a concentration dependent manner.**

*Mtb* was grown in 7H9-based broth and exposed to compound 1 (C1) in the absence or presence of increasing concentrations guanine. CFU was enumerated after a week of exposure. In a parallel experiment, *Mtb* was treated with isoniazid for 1 week followed by CFU enumeration (right panel).

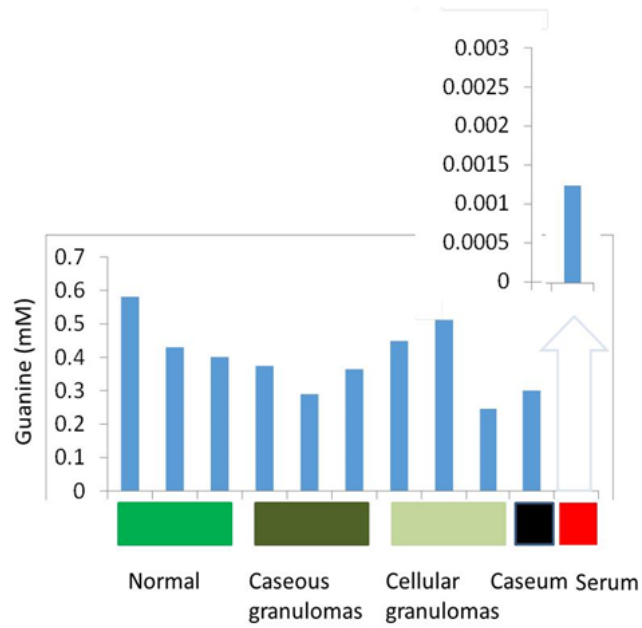

**Figure S6. Guanine levels measured in rabbit uninvolved lung and lesion homogenates at 20 weeks post-infection, when lesions have fully matured and differentiated.** Cellular granulomas are exclusively composed of immune cells, caseous granulomas contain a necrotic central core, and caseum was collected from an open cavity.

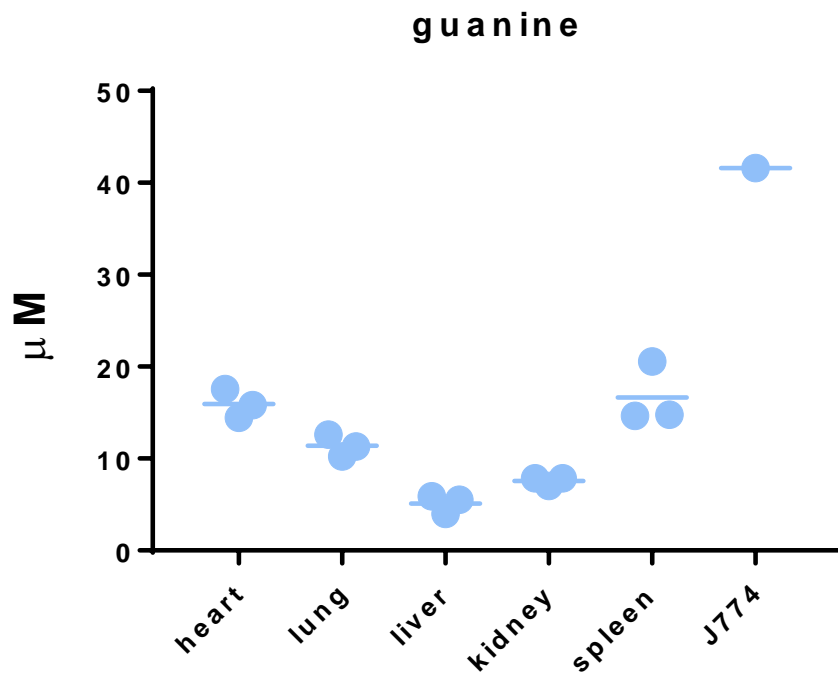

Figure S7. Guanine levels measured in uninfected mouse organs and in J774 cells.

**Table S1:** Profiles of compound **1** and compound **2**

| ID                                                      | 1                                                                                 | 2                                                                                   |
|---------------------------------------------------------|-----------------------------------------------------------------------------------|-------------------------------------------------------------------------------------|
|                                                         | 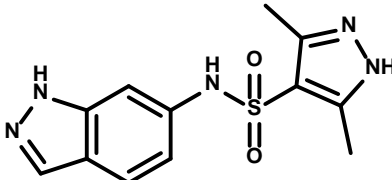 |  |
| GAST/Fe MIC ( $\mu\text{M}$ )                           | 2                                                                                 | 2                                                                                   |
| 7H9/ADC/Tw MIC ( $\mu\text{M}$ )                        | 2                                                                                 | 2                                                                                   |
| HepG2 IC <sub>50</sub> ( $\mu\text{M}$ )                | > 50                                                                              | > 50                                                                                |
| Off target bioprofile                                   | Clean                                                                             | Clean                                                                               |
| hERG IC <sub>50</sub> (Thallium Flux) ( $\mu\text{M}$ ) | > 30 $\mu\text{M}$                                                                | > 30 $\mu\text{M}$                                                                  |
| Kinetic Solubility ( $\mu\text{M}$ )                    | > 250                                                                             | > 100                                                                               |
| Molecular Weight                                        | 291                                                                               | 291                                                                                 |
| In silico logP/D                                        | 1.5/1.5                                                                           | 1.5/1.5                                                                             |
| In silico TPSA                                          | 103                                                                               | 103                                                                                 |
| Microsomal Clearance (mL/min/g)                         | Mouse = 4.1<br>Rat = 1.8<br>Marmoset < 0.5<br>Rabbit NZW = 4.7<br>Human = 0.5     | Mouse = 2.2<br>Human < 0.5                                                          |
| C57 mouse PPB                                           | 52 % unbound                                                                      | 40 %                                                                                |

**Table S2: Metabolomic data for treatment of Mtb with active or inactive indazole scaffold**

| Compound Name                | Formula           | Mass    | RT (min) | OX    |       | AC-   |
|------------------------------|-------------------|---------|----------|-------|-------|-------|
|                              |                   |         |          | Level | SD(±) | Level |
| Uracil                       | C4 H4 N2 O2       | 112.026 | 2.44     | 1.00  | 0.10  | 1.40  |
| Thymine                      | C5 H6 N2 O2       | 126.042 | 1.63     | 1.00  | 0.05  | 1.02  |
| Adenine                      | C5 H5 N5          | 135.053 | 3.09     | 1.00  | 0.07  | 1.42  |
| Hypoxanthine                 | C5 H4 N4 O        | 136.037 | 6.41     | 1.00  | 0.07  | 1.29  |
| Deoxycytidine                | C9 H13 N3 O4      | 227.09  | 2.01     | 1.00  | 0.23  | 0.69  |
| Uridine                      | C9 H12 N2 O6      | 244.067 | 3.17     | 1.00  | 0.06  | 1.02  |
| Inosine                      | C10 H12 N4 O5     | 268.08  | 11.29    | 1.00  | 0.13  | 0.96  |
| Guanosine                    | C10 H13 N5 O5     | 283.089 | 4.07     | 1.00  | 0.45  | 1.38  |
| Xanthosine                   | C10 H12 N4 O6     | 284.082 | 5        | 1.00  | 0.14  | 0.91  |
| dCMP                         | C9 H14 N3 O7 P    | 307.055 | 12.68    | 1.00  | 0.19  | 2.07  |
| dTMP                         | C10 H15 N2 O8 P   | 322.056 | 12.45    | 1.00  | 0.11  | 1.72  |
| CMP                          | C9 H14 N3 O8 P    | 323.056 | 12.45    | 1.00  | 0.10  | 1.08  |
| UMP                          | C9 H13 N2 O9 P    | 324.034 | 12.47    | 1.00  | 0.06  | 0.75  |
| cAMP                         | C10 H12 N5 O6 P   | 329.052 | 5.78     | 1.00  | 0.23  | 5.17  |
| dAMP                         | C10 H14 N5 O6 P   | 331.067 | 12.63    | 1.00  | 0.21  | 1.43  |
| 2'-Deoxyinosine 5'-phosphate | C10 H13 N4 O7 P   | 332.051 | 12.29    | 1.00  | 0.02  | 0.53  |
| cGMP                         | C10 H12 N5 O7 P   | 345.042 | 12.19    | 1.00  | 0.11  | 0.91  |
| AMP                          | C10 H14 N5 O7 P   | 347.062 | 12.58    | 1.00  | 0.13  | 1.02  |
| IMP                          | C10 H13 N4 O8 P   | 348.054 | 12.56    | 1.00  | 0.51  | 8.24  |
| GMP                          | C10 H14 N5 O8 P   | 363.056 | 12.59    | 1.00  | 0.06  | 0.67  |
| XMP                          | C10 H13 N4 O9 P   | 364.044 | 12.59    | 1.00  | 0.11  | 0.75  |
| dCDP                         | C9 H15 N3 O10 P2  | 387.017 | 12.63    | 1.00  | 0.18  | 2.83  |
| dUDP                         | C9 H14 N2 O11 P2  | 388.01  | 12.67    | 1.00  | 0.24  | 2.42  |
| Acetyl adenylate             | C12 H16 N5 O8 P   | 389.079 | 12.15    | 1.00  | 0.07  | 1.10  |
| dTDP                         | C10 H16 N2 O11 P2 | 402.012 | 12.47    | 1.00  | 0.05  | 0.88  |
| CDP                          | C9 H15 N3 O11 P2  | 403.004 | 12.46    | 1.00  | 0.05  | 0.88  |
| UDP                          | C9 H14 N2 O12 P2  | 404     | 12.47    | 1.00  | 0.13  | 0.62  |
| ADP                          | C10 H15 N5 O10 P2 | 427.028 | 12.55    | 1.00  | 0.12  | 1.02  |
| IDP                          | C10 H14 N4 O11 P2 | 428.024 | 12.55    | 1.00  | 0.24  | 2.22  |
| dCTP                         | C9 H16 N3 O13 P3  | 466.995 | 12.8     | 1.00  | 0.09  | 1.15  |
| dTTP                         | C10 H17 N2 O14 P3 | 481.985 | 12.47    | 1.00  | 0.09  | 0.91  |
| CTP                          | C9 H16 N3 O14 P3  | 482.975 | 12.46    | 1.00  | 0.09  | 0.91  |
| UTP                          | C9 H15 N2 O15 P3  | 483.971 | 12.48    | 1.00  | 0.13  | 0.82  |
| ATP                          | C10 H16 N5 O13 P3 | 506.996 | 12.54    | 1.00  | 0.19  | 1.05  |
| UDP-glucose                  | C15 H24 N2 O17 P2 | 566.058 | 11.86    | 1.00  | 0.25  | 0.85  |

|                                  |                     |         |       |      |      |      |
|----------------------------------|---------------------|---------|-------|------|------|------|
| ADP-glucose                      | C16 H25 N5 O15 P2   | 589.085 | 12.18 | 1.00 | 0.25 | 1.55 |
| GDP-glucose                      | C16 H25 N5 O16 P2   | 605.083 | 12.18 | 1.00 | 0.12 | 1.15 |
| UDP-N-acetyl-alpha-D-glucosamine | C17 H27 N3 O17 P2   | 607.086 | 11.89 | 1.00 | 0.07 | 1.10 |
| CoA                              | C21 H36 N7 O16 P3 S | 767.119 | 12.27 | 1.00 | 0.06 | 0.99 |
| Acetyl-CoA                       | C23 H38 N7 O17 P3 S | 809.127 | 12.25 | 1.00 | 0.04 | 1.21 |
| Succinyl-CoA                     | C25 H40 N7 O19 P3 S | 867.138 | 12.34 | 1.00 | 0.13 | 1.03 |

---

| 0.5X  | AC-1X |       | AC-5X |       | AC-10X |       | IN-0.5X |       | IN-1X |       | IN-5X |       | IN-   |
|-------|-------|-------|-------|-------|--------|-------|---------|-------|-------|-------|-------|-------|-------|
| SD(±) | Level | SD(±) | Level | SD(±) | Level  | SD(±) | Level   | SD(±) | Level | SD(±) | Level | SD(±) | Level |
| 0.19  | 1.26  | 0.11  | 1.76  | 0.15  | 1.61   | 0.26  | 2.54    | 0.82  | 0.99  | 0.05  | 1.03  | 0.11  | 1.06  |
| 0.04  | 0.85  | 0.01  | 0.89  | 0.05  | 0.91   | 0.05  | 0.81    | 0.34  | 0.79  | 0.05  | 0.80  | 0.06  | 0.74  |
| 0.14  | 1.27  | 0.01  | 1.61  | 0.15  | 1.58   | 0.09  | 1.99    | 0.34  | 2.99  | 0.05  | 3.26  | 0.10  | 2.96  |
| 0.01  | 1.00  | 0.05  | 1.33  | 0.08  | 1.39   | 0.03  | 0.92    | 0.13  | 0.97  | 0.01  | 1.03  | 0.04  | 0.88  |
| 0.31  | 0.58  | 0.04  | 0.79  | 0.07  | 0.67   | 0.22  | 1.02    | 0.91  | 1.12  | 0.25  | 1.35  | 0.08  | 0.81  |
| 0.05  | 0.84  | 0.05  | 1.06  | 0.11  | 0.95   | 0.04  | 1.50    | 0.18  | 1.22  | 0.05  | 1.15  | 0.15  | 0.95  |
| 0.13  | 0.90  | 0.10  | 0.87  | 0.09  | 0.70   | 0.06  | 0.56    | 0.56  | 0.62  | 0.05  | 0.83  | 0.14  | 0.63  |
| 0.37  | 0.69  | 0.13  | 0.97  | 0.06  | 1.02   | 0.07  | 1.15    | 0.60  | 2.67  | 0.12  | 1.42  | 0.53  | 1.47  |
| 0.01  | 1.25  | 0.06  | 1.56  | 0.24  | 0.88   | 0.17  | 0.90    | 0.26  | 0.66  | 0.21  | 1.09  | 0.13  | 0.80  |
| 0.07  | 2.29  | 0.29  | 1.53  | 0.31  | 1.05   | 0.42  | 0.32    | 0.60  | 0.25  | 0.12  | 0.24  | 0.19  | 0.24  |
| 0.08  | 2.15  | 0.09  | 1.49  | 0.17  | 1.22   | 0.18  | 0.63    | 0.16  | 0.68  | 0.06  | 0.77  | 0.06  | 0.86  |
| 0.14  | 1.19  | 0.16  | 0.79  | 0.22  | 0.63   | 0.20  | 0.33    | 0.26  | 0.28  | 0.07  | 0.35  | 0.13  | 0.37  |
| 0.09  | 0.84  | 0.10  | 0.78  | 0.05  | 0.76   | 0.08  | 0.70    | 0.24  | 0.88  | 0.07  | 0.76  | 0.02  | 0.74  |
| 0.20  | 5.87  | 0.03  | 9.26  | 0.05  | 7.93   | 0.10  | 1.08    | 0.03  | 1.25  | 0.03  | 1.20  | 0.13  | 1.08  |
| 0.11  | 1.84  | 0.24  | 1.39  | 0.20  | 0.94   | 0.31  | 0.21    | 1.23  | 0.11  | 0.53  | 0.35  | 0.57  | 0.35  |
| 0.13  | 0.40  | 0.06  | 0.29  | 0.20  | 0.27   | 0.20  | 0.89    | 0.38  | 1.31  | 0.09  | 1.41  | 0.10  | 1.09  |
| 0.06  | 1.00  | 0.02  | 0.89  | 0.17  | 0.94   | 0.04  | 0.79    | 0.25  | 0.75  | 0.13  | 0.88  | 0.13  | 0.70  |
| 0.23  | 1.19  | 0.34  | 0.79  | 0.42  | 0.49   | 0.34  | 0.20    | 0.44  | 0.16  | 0.07  | 0.25  | 0.18  | 0.23  |
| 0.08  | 14.14 | 0.09  | 19.86 | 0.14  | 16.02  | 0.09  | 0.91    | 0.65  | 1.07  | 0.21  | 0.96  | 0.20  | 1.52  |
| 0.10  | 0.54  | 0.22  | 0.31  | 0.15  | 0.21   | 0.19  | 0.24    | 0.50  | 0.09  | 0.29  | 0.20  | 0.42  | 0.14  |
| 0.04  | 0.54  | 0.05  | 0.48  | 0.07  | 0.53   | 0.09  | 0.77    | 0.47  | 0.84  | 0.04  | 1.15  | 0.09  | 1.01  |
| 0.45  | 2.54  | 0.08  | 4.02  | 0.25  | 4.83   | 0.34  | 2.43    | 0.29  | 1.80  | 0.41  | 2.34  | 0.24  | 0.64  |
| 0.43  | 3.48  | 0.40  | 3.52  | 0.24  | 3.74   | 0.19  | 1.47    | 0.44  | 0.66  | 0.15  | 0.49  | 0.45  | 0.51  |
| 0.05  | 1.14  | 0.13  | 1.06  | 0.04  | 0.94   | 0.05  | 0.64    | 0.52  | 0.67  | 0.09  | 0.63  | 0.08  | 0.64  |
| 0.07  | 0.92  | 0.10  | 0.83  | 0.10  | 0.71   | 0.10  | 0.70    | 0.36  | 0.95  | 0.05  | 0.84  | 0.04  | 0.86  |
| 0.02  | 0.89  | 0.13  | 0.84  | 0.09  | 0.72   | 0.11  | 0.68    | 0.31  | 0.89  | 0.05  | 0.80  | 0.03  | 0.78  |
| 0.13  | 0.58  | 0.04  | 0.52  | 0.15  | 0.41   | 0.10  | 0.54    | 0.39  | 0.75  | 0.01  | 0.68  | 0.07  | 0.65  |
| 0.17  | 0.84  | 0.10  | 1.17  | 0.09  | 1.11   | 0.18  | 0.88    | 0.19  | 0.96  | 0.06  | 0.91  | 0.03  | 0.68  |
| 0.12  | 2.58  | 0.08  | 2.58  | 0.20  | 2.11   | 0.25  | 0.28    | 0.54  | 0.47  | 0.34  | 0.34  | 0.31  | 0.64  |
| 0.02  | 1.22  | 0.09  | 1.17  | 0.03  | 1.09   | 0.02  | 0.68    | 0.24  | 0.83  | 0.03  | 0.85  | 0.05  | 0.77  |
| 0.13  | 0.82  | 0.06  | 0.86  | 0.13  | 0.74   | 0.05  | 0.95    | 0.47  | 1.39  | 0.03  | 1.11  | 0.03  | 1.05  |
| 0.17  | 0.89  | 0.06  | 0.90  | 0.10  | 0.79   | 0.05  | 0.99    | 0.47  | 1.45  | 0.08  | 1.16  | 0.07  | 1.16  |
| 0.17  | 0.64  | 0.13  | 1.01  | 0.03  | 0.99   | 0.13  | 1.07    | 0.32  | 1.44  | 0.09  | 1.01  | 0.08  | 0.70  |
| 0.23  | 0.78  | 0.24  | 1.43  | 0.03  | 1.41   | 0.18  | 1.10    | 0.20  | 1.20  | 0.07  | 0.92  | 0.03  | 0.66  |
| 0.14  | 0.76  | 0.06  | 1.04  | 0.03  | 0.88   | 0.06  | 0.66    | 0.41  | 0.84  | 0.08  | 0.77  | 0.24  | 0.54  |

|      |      |      |      |      |      |      |      |      |      |      |      |      |      |
|------|------|------|------|------|------|------|------|------|------|------|------|------|------|
| 0.29 | 1.95 | 0.23 | 3.49 | 0.25 | 4.06 | 0.24 | 1.67 | 0.40 | 1.83 | 0.16 | 2.22 | 0.23 | 1.76 |
| 0.12 | 1.11 | 0.04 | 1.31 | 0.20 | 1.40 | 0.12 | 0.88 | 0.20 | 0.61 | 0.04 | 0.83 | 0.08 | 0.76 |
| 0.04 | 1.15 | 0.12 | 1.35 | 0.04 | 1.19 | 0.02 | 0.62 | 0.27 | 0.69 | 0.07 | 0.71 | 0.14 | 0.61 |
| 0.06 | 0.95 | 0.09 | 1.07 | 0.08 | 0.88 | 0.06 | 0.98 | 0.29 | 1.46 | 0.05 | 1.54 | 0.07 | 1.58 |
| 0.07 | 1.24 | 0.05 | 1.42 | 0.09 | 1.10 | 0.08 | 0.81 | 0.19 | 0.78 | 0.07 | 0.99 | 0.03 | 0.95 |
| 0.10 | 1.09 | 0.04 | 1.14 | 0.07 | 1.09 | 0.13 | 0.79 | 0.19 | 0.47 | 0.08 | 0.44 | 0.19 | 0.40 |



---

---

10X

SD(±)

---

0.15  
0.06  
0.02  
0.10  
0.17  
0.15  
0.09  
0.10  
0.04  
0.18  
0.07  
0.13  
0.13  
0.12  
0.19  
0.03  
0.02  
0.10  
0.22  
0.16  
0.02  
0.95  
0.37  
0.16  
0.10  
0.11  
0.07  
0.08  
0.15  
0.10  
0.06  
0.07  
0.02  
0.09  
0.08

0.03  
0.14  
0.04  
0.00  
0.09  
0.11

**Table S3.** Correlation between IMPDH enzyme inhibition and activity against wild type versus indazole sulfonamide resistant Mtb strains.

| ID          | logP  | MW  | MIC ( $\mu$ M)<br>MEAN | % enzyme<br>inhibition<br>(@20 $\mu$ M) | % enzyme<br>inhibition<br>(@1 $\mu$ M) | SR2.1<br>cross<br>resistance<br>Fold<br>change | MIC<br>rescued<br>by 100 $\mu$ M<br>Guanine |
|-------------|-------|-----|------------------------|-----------------------------------------|----------------------------------------|------------------------------------------------|---------------------------------------------|
| DDD00935325 | 2.708 | 427 | 0.24                   | 99.5                                    | 87.7                                   | 12                                             | Y                                           |
| DDD01002530 | 1.566 | 417 | 0.24                   | 97.6                                    | 78.2                                   | 16                                             | Y                                           |
| DDD00935330 | 1.751 | 410 | 0.3                    | 98.4                                    | 75.9                                   | 16                                             | Y                                           |
| DDD01002616 | 1.566 | 417 | 0.3                    | 98.7                                    | 85.7                                   | 24                                             | Y                                           |
| DDD01004488 | 1.878 | 387 | 0.3                    | 97.6                                    | 86.7                                   | 16                                             | Y                                           |
| DDD00935326 | 1.416 | 361 | 0.45                   | 90.3                                    | 74                                     | 24                                             | Y                                           |
| DDD00853835 | 2.708 | 427 | 0.59                   | 99.4                                    | 90                                     | 16                                             | Y                                           |
| DDD00935322 | 1.008 | 347 | 0.6                    | 93.4                                    | 69.7                                   | 24                                             | Y                                           |
| DDD01004489 | 2.283 | 401 | 0.6                    | 99                                      | 84.3                                   | 16                                             | Y                                           |
| DDD01008438 | 3.389 | 589 | 0.6                    | 97.4                                    | 90.6                                   | 12                                             | Y                                           |
| DDD00853834 | 1.008 | 347 | 0.69                   | 85.2                                    | 56.6                                   | 16                                             | Y                                           |
| DDD00853766 | 2.621 | 409 | 0.9                    | 99.5                                    | 84.5                                   | 16                                             | Y                                           |
| DDD00935323 | 1.235 | 361 | 1.37                   | 95.9                                    | 65.7                                   | 24                                             | Y                                           |
| DDD01008394 | 2.493 | 398 | 1.56                   | 94.6                                    | 57.8                                   | 16                                             | Y                                           |
| DDD01009870 | 0.891 | 333 | 1.56                   | 84.7                                    | 41.2                                   | 22                                             | Y                                           |
| DDD00203282 | 1.472 | 291 | 1.77                   | 91.9                                    | 57.6                                   | 16                                             | Y                                           |
| DDD00079282 | 1.472 | 291 | 1.93                   | 83.5                                    | 33                                     | 22                                             | Y                                           |
| DDD01004513 | 1.348 | 377 | 2.3                    | 96.5                                    | 70.5                                   | 24                                             | Y                                           |
| DDD01008388 | 2.215 | 421 | 2.3                    | 94.4                                    | 38.4                                   | 16                                             | Y                                           |
| DDD00080629 | 1.904 | 292 | 4.51                   | 81.6                                    | 24.6                                   | >8                                             | Y                                           |
| DDD01005486 | 1.386 | 321 | 4.7                    | 92                                      | 38.7                                   | >5.3                                           | Y                                           |
| DDD01005488 | 1.881 | 305 | 4.7                    | 72                                      | 7.8                                    | >4                                             | Y                                           |
| DDD00203278 | 1.904 | 292 | 4.94                   | 89.5                                    | 48                                     | >8                                             | Y                                           |
| DDD01008258 | -0.14 | 295 | 7.875                  | 31.8                                    | <1                                     | >4                                             | Y                                           |
| DDD01011636 | 1.875 | 362 | 9.4                    | 84                                      | 34                                     | >8                                             | Y                                           |
| DDD01002541 | 1.972 | 302 | 10.84                  | 79.3                                    | 12.2                                   | >4                                             | Y                                           |
| DDD01011021 | 4.058 | 397 | 12.5                   | 88                                      | 29.3                                   | 1                                              | N                                           |
| DDD01005616 | 2.102 | 326 | 21.79                  | 80                                      | 20.7                                   | 1                                              | Y                                           |
| DDD00201218 | 1.472 | 291 | 50                     | <2                                      | 1.4                                    | 1                                              | N/A                                         |
| DDD00853278 | 1.302 | 291 | 50                     | <2                                      | <1                                     | 1                                              | N/A                                         |
| DDD00853331 | 2.127 | 294 | 50                     | <2                                      | 1                                      | 1                                              | N/A                                         |
| DDD01005617 | 1.881 | 305 | 50                     | 72.5                                    | 14                                     | >1                                             | Y                                           |
| DDD01005619 | 1.603 | 291 | 50                     | <2                                      | 0.6                                    | 1                                              | N/A                                         |
| DDD01011048 | 0.446 | 309 | 50                     | 51.3                                    | 13.3                                   | 1                                              | N/A                                         |
| DDD01011589 | 0.704 | 292 | 50                     | <2                                      | 0                                      | 1                                              | N/A                                         |
| DDD01053468 | 4.532 | 351 | 50                     | <2                                      | 1.2                                    | 1                                              | N                                           |
| DDD01053477 | 3.718 | 413 | 50                     | 88.5                                    | 38.3                                   | 1                                              | N/A                                         |

**Table S4: Experimental Set-up**

| Data in table Nr. | Experiment number | Capturing Compound | Compound for competition | Compound Conc.          | Material for protein extract preparation |
|-------------------|-------------------|--------------------|--------------------------|-------------------------|------------------------------------------|
| 1                 | X019923           | Compound 5         |                          |                         | Mycobacterium Bovis BCG                  |
|                   | X019923           | Compound 5         |                          |                         | Mycobacterium Bovis BCG                  |
|                   | X019923           | Compound 5         | Compound 6               | 2.5uM                   | Mycobacterium Bovis BCG                  |
|                   | X019923           | Compound 5         | Compound 6               | 10.0uM                  | Mycobacterium Bovis BCG                  |
|                   | X019923           | Compound 5         | Compound 6               | 40.0uM                  | Mycobacterium Bovis BCG                  |
|                   | X019923           | Compound 5         |                          |                         | Mycobacterium Bovis BCG                  |
|                   | X019923           | Compound 5         |                          |                         | Mycobacterium Bovis BCG                  |
|                   | X019923           | Compound 5         | Compound 6               | 2.5uM                   | Mycobacterium Bovis BCG                  |
|                   | X019923           | Compound 5         | Compound 6               | 10.0uM                  | Mycobacterium Bovis BCG                  |
| X019923           | Compound 5        | Compound 6         | 40.0uM                   | Mycobacterium Bovis BCG |                                          |
| 2                 | X020165           | Compound 5         | Compound 6               | 40.0uM                  | Mycobacterium Bovis BCG                  |
|                   | X020165           | Compound 5         | Compound 6               | 10.0uM                  | Mycobacterium Bovis BCG                  |
|                   | X020165           | Compound 5         | Compound 6               | 2.5uM                   | Mycobacterium Bovis BCG                  |
|                   | X020165           | Compound 5         | Compound 6               | 0.625uM                 | Mycobacterium Bovis BCG                  |
|                   | X020165           | Compound 5         | Compound 6               | 0.15625uM               | Mycobacterium Bovis BCG                  |
|                   | X020165           | Compound 5         | Compound 6               | 0.0uM                   | Mycobacterium Bovis BCG                  |
| 3                 | X020167           | Compound 5         | Compound 7               | 40.0uM                  | Mycobacterium Bovis BCG                  |
|                   | X020167           | Compound 5         | Compound 7               | 10.0uM                  | Mycobacterium Bovis BCG                  |
|                   | X020167           | Compound 5         | Compound 7               | 2.5uM                   | Mycobacterium Bovis BCG                  |
|                   | X020167           | Compound 5         | Compound 7               | 0.625uM                 | Mycobacterium Bovis BCG                  |
|                   | X020167           | Compound 5         | Compound 7               | 0.15625uM               | Mycobacterium Bovis BCG                  |
|                   | X020167           | Compound 5         | Compound 7               | 0.0uM                   | Mycobacterium Bovis BCG                  |
| 4                 | X020168           | Compound 4         | Compound 6               | 40.0uM                  | Mixed HEK293/K-562/Placenta              |
|                   | X020168           | Compound 4         | Compound 6               | 10.0uM                  | Mixed HEK293/K-562/Placenta              |
|                   | X020168           | Compound 4         | Compound 6               | 2.5uM                   | Mixed HEK293/K-562/Placenta              |
|                   | X020168           | Compound 4         | Compound 6               | 0.625uM                 | Mixed HEK293/K-562/Placenta              |
|                   | X020168           | Compound 4         | Compound 6               | 0.15625uM               | Mixed HEK293/K-562/Placenta              |
|                   | X020168           | Compound 4         | Compound 6               | 0.0uM                   | Mixed HEK293/K-562/Placenta              |
| 5                 | X020169           | Compound 5         | Compound 6               | 40.0uM                  | Mixed HEK293/K-562/Placenta              |
|                   | X020169           | Compound 5         | Compound 6               | 10.0uM                  | Mixed HEK293/K-562/Placenta              |
|                   | X020169           | Compound 5         | Compound 6               | 2.5uM                   | Mixed HEK293/K-562/Placenta              |
|                   | X020169           | Compound 5         | Compound 6               | 0.625uM                 | Mixed HEK293/K-562/Placenta              |
|                   | X020169           | Compound 5         | Compound 6               | 0.15625uM               | Mixed HEK293/K-562/Placenta              |

|  |         |            |            |       |                             |
|--|---------|------------|------------|-------|-----------------------------|
|  | X020169 | Compound 5 | Compound 6 | 0.0uM | Mixed HEK293/K-562/Placenta |
|--|---------|------------|------------|-------|-----------------------------|

Park et al., Supplementary Table 5

MS/MS data for depletion of proteins by the Compound 5 probe matrix in Mycobacterium Bovis BCG cell extracts, and resulting correction factors for calculation of apparent dissociation constants from IC50 values

Abbreviations: SSM; number of spectrum-to-sequence matches, UPM; unique peptide matches, NA; not available, NBF; nonbound fraction

| Experiment ID | Protein Name | Mascot Score | SSM | UPM | SSM used for quantification | Compound conc. on beads 1mM |                               |                                 |                                |                                | IC50/KD (app) | first binding to beads |
|---------------|--------------|--------------|-----|-----|-----------------------------|-----------------------------|-------------------------------|---------------------------------|--------------------------------|--------------------------------|---------------|------------------------|
|               |              |              |     |     |                             | relative abundance          |                               |                                 |                                |                                |               |                        |
|               |              |              |     |     |                             | first binding to beads      | binding of NBF to fresh beads | compound competition 2.5 uM GSK | compound competition 10 uM GSK | compound competition 40 uM GSK |               |                        |
| X019923       | BCG_0003     | 226          | 6   | 6   | 6                           | 1.00                        | 0.85                          | 0.82                            | 0.92                           | 0.94                           | 1.18          | 0.75                   |
| X019923       | BCG_0005     | 847          | 36  | 19  | 26                          | 1.00                        | 0.92                          | 0.99                            | 1.01                           | 1.07                           | 1.08          | 0.77                   |
| X019923       | BCG_0006     | 1843         | 67  | 36  | 44                          | 1.00                        | 0.92                          | 0.86                            | 0.82                           | 0.95                           | 1.09          | 0.90                   |
| X019923       | BCG_0007     | 557          | 20  | 11  | 17                          | 1.00                        | 0.86                          | 0.86                            | 0.93                           | 1.00                           | 1.16          | 0.86                   |
| X019923       | BCG_0008C    | 166          | 6   | 3   | 4                           | 1.00                        | 0.80                          | 0.75                            | 0.92                           | 0.92                           | 1.24          | 0.68                   |
| X019923       | BCG_0009     | 583          | 28  | 7   | 19                          | 1.00                        | 0.85                          | 0.90                            | 1.06                           | 1.12                           | 1.17          | 0.60                   |
| X019923       | BCG_0012     | 115          | 7   | 3   | 3                           | 1.00                        | 0.96                          | 0.97                            | 1.29                           | 0.92                           | 1.04          | 0.94                   |
| X019923       | BCG_0023C    | 1011         | 28  | 18  | 25                          | 1.00                        | 0.90                          | 0.88                            | 0.84                           | 0.94                           | 1.11          | 0.55                   |
| X019923       | BCG_0027C    | 263          | 19  | 5   | 11                          | 1.00                        | 0.90                          | 0.81                            | 0.93                           | 0.98                           | 1.11          | 0.79                   |
| X019923       | BCG_0029C    | 230          | 11  | 6   | 8                           | 1.00                        | 0.84                          | 0.88                            | 0.97                           | 0.96                           | 1.19          | 0.80                   |
| X019923       | BCG_0030C    | 135          | 22  | 4   | 10                          | 1.00                        | 0.67                          | 0.70                            | 0.73                           | 0.62                           | 1.49          | 0.64                   |
| X019923       | BCG_0031     | 572          | 21  | 14  | 16                          | 1.00                        | 0.91                          | 0.91                            | 1.04                           | 1.11                           | 1.10          | 0.81                   |
| X019923       | BCG_0032     | 626          | 25  | 14  | 20                          | 1.00                        | 0.92                          | 0.99                            | 1.20                           | 1.28                           | 1.08          | 0.77                   |
| X019923       | BCG_0034     | 133          | 7   | 2   | 2                           | 1.00                        | 0.96                          | 0.87                            | 1.27                           | 1.20                           | 1.04          | 0.81                   |
| X019923       | BCG_0044C    | 866          | 35  | 17  | 21                          | 1.00                        | 0.95                          | 0.92                            | 0.98                           | 0.96                           | 1.06          | 0.99                   |
| X019923       | BCG_0045C    | 419          | 12  | 7   | 9                           | 1.00                        | 1.03                          | 0.86                            | 0.97                           | 0.96                           | 0.97          | 0.90                   |
| X019923       | BCG_0046C    | 889          | 23  | 18  | 19                          | 1.00                        | 0.90                          | 0.84                            | 0.94                           | 0.95                           | 1.11          | 1.20                   |
| X019923       | BCG_0047C    | 228          | 8   | 5   | 6                           | 1.00                        | 0.82                          | 0.77                            | 0.90                           | 0.86                           | 1.22          | 1.06                   |
| X019923       | BCG_0048C    | 653          | 20  | 13  | 15                          | 1.00                        | 0.94                          | 0.88                            | 0.99                           | 0.93                           | 1.06          | 0.84                   |
| X019923       | BCG_0049C    | 469          | 16  | 9   | 12                          | 1.00                        | 0.89                          | 0.86                            | 0.97                           | 1.03                           | 1.13          | 1.02                   |
| X019923       | BCG_0050C    | 1005         | 55  | 22  | 39                          | 1.00                        | 0.84                          | 0.77                            | 0.84                           | 0.86                           | 1.18          | 0.72                   |
| X019923       | BCG_0053     | 226          | 5   | 3   | 3                           | 1.00                        | 0.61                          | 0.79                            | 0.95                           | 1.04                           | 1.65          | 0.73                   |

|         |           |      |    |    |    |      |      |      |      |      |      |      |
|---------|-----------|------|----|----|----|------|------|------|------|------|------|------|
| X019923 | BCG_0056  | 97   | 6  | 2  | 2  | 1.00 | 0.90 | 1.18 | 1.22 | 1.09 | 1.11 | 0.84 |
| X019923 | BCG_0060  | 75   | 7  | 2  | 2  | 1.00 | 0.88 | 0.92 | 1.04 | 0.99 | 1.13 | 0.70 |
| X019923 | BCG_0068C | 66   | 4  | 2  | 2  | 1.00 | 0.85 | 0.99 | 0.84 | 1.01 | 1.17 | 1.04 |
| X019923 | BCG_0069  | 124  | 3  | 3  | 3  | 1.00 | 0.73 | 0.70 | 0.81 | 0.89 | 1.36 | 0.78 |
| X019923 | BCG_0072  | 1045 | 29 | 20 | 21 | 1.00 | 0.75 | 0.70 | 0.89 | 0.80 | 1.33 | 0.78 |
| X019923 | BCG_0074C | 218  | 9  | 5  | 5  | 1.00 | 0.82 | 0.74 | 0.72 | 0.86 | 1.22 | 0.72 |
| X019923 | BCG_0075C | 616  | 32 | 14 | 24 | 1.00 | 0.86 | 0.82 | 0.85 | 0.85 | 1.16 | 0.76 |
| X019923 | BCG_0076C | 255  | 11 | 5  | 6  | 1.00 | 0.90 | 0.82 | 1.14 | 1.28 | 1.11 | 0.66 |
| X019923 | BCG_0077C | 894  | 39 | 15 | 27 | 1.00 | 0.87 | 0.90 | 1.02 | 1.16 | 1.14 | 0.78 |
| X019923 | BCG_0078C | 511  | 23 | 9  | 14 | 1.00 | 1.04 | 0.96 | 0.99 | 0.96 | 0.96 | 1.19 |
| X019923 | BCG_0079C | 552  | 18 | 12 | 15 | 1.00 | 0.89 | 0.92 | 1.00 | 0.94 | 1.13 | 0.86 |
| X019923 | BCG_0080  | 189  | 4  | 4  | 4  | 1.00 | 1.13 | 1.09 | 1.22 | 1.44 | 0.89 | 1.14 |
| X019923 | BCG_0081  | 578  | 17 | 12 | 14 | 1.00 | 1.02 | 0.85 | 0.98 | 0.91 | 0.98 | 1.10 |
| X019923 | BCG_0082  | 349  | 11 | 7  | 7  | 1.00 | 0.83 | 0.76 | 0.93 | 0.81 | 1.20 | 0.97 |
| X019923 | BCG_0083  | 305  | 8  | 6  | 7  | 1.00 | 0.90 | 0.98 | 1.15 | 1.18 | 1.11 | 1.01 |
| X019923 | BCG_0084  | 492  | 36 | 10 | 21 | 1.00 | 0.87 | 0.82 | 0.93 | 0.83 | 1.14 | 0.73 |
| X019923 | BCG_0085  | 573  | 40 | 8  | 22 | 1.00 | 0.87 | 0.83 | 0.97 | 0.97 | 1.15 | 0.73 |
| X019923 | BCG_0086  | 453  | 39 | 11 | 31 | 1.00 | 0.87 | 0.77 | 0.84 | 0.86 | 1.16 | 0.75 |
| X019923 | BCG_0087  | 588  | 38 | 12 | 29 | 1.00 | 0.88 | 0.84 | 0.89 | 0.84 | 1.14 | 0.75 |
| X019923 | BCG_0089  | 137  | 8  | 4  | 4  | 1.00 | 1.23 | 1.16 | 1.09 | 1.06 | 0.81 | 1.04 |
| X019923 | BCG_0091  | 338  | 10 | 6  | 7  | 1.00 | 0.90 | 0.98 | 1.00 | 1.21 | 1.11 | 0.75 |
| X019923 | BCG_0093  | 322  | 11 | 6  | 7  | 1.00 | 0.95 | 0.82 | 1.00 | 0.99 | 1.06 | 0.80 |
| X019923 | BCG_0095A | 143  | 7  | 5  | 5  | 1.00 | 1.04 | 0.88 | 1.07 | 1.09 | 0.97 | 0.74 |
| X019923 | BCG_0096  | 348  | 8  | 6  | 7  | 1.00 | 0.82 | 0.95 | 0.98 | 1.06 | 1.21 | 0.67 |
| X019923 | BCG_0097C | 1081 | 44 | 22 | 28 | 1.00 | 0.96 | 0.95 | 0.99 | 0.97 | 1.04 | 0.78 |
| X019923 | BCG_0098C | 131  | 4  | 3  | 4  | 1.00 | 0.97 | 0.94 | 1.02 | 1.05 | 1.04 | 0.74 |
| X019923 | BCG_0099  | 151  | 6  | 4  | 4  | 1.00 | 1.03 | 0.94 | 1.29 | 1.28 | 0.97 | 0.69 |
| X019923 | BCG_0100C | 68   | 3  | 2  | 2  | 1.00 | 1.02 | 0.97 | 1.35 | 1.24 | 0.98 | 0.95 |
| X019923 | BCG_0101C | 240  | 17 | 5  | 5  | 1.00 | 0.80 | 0.85 | 1.11 | 1.02 | 1.25 | 0.88 |
| X019923 | BCG_0103  | 196  | 7  | 6  | 7  | 1.00 | 0.91 | 0.96 | 1.04 | 1.15 | 1.10 | 0.85 |
| X019923 | BCG_0104  | 89   | 5  | 2  | 2  | 1.00 | 0.81 | 0.57 | 0.86 | 0.83 | 1.23 | 0.76 |
| X019923 | BCG_0105  | 176  | 7  | 4  | 4  | 1.00 | 0.93 | 0.94 | 1.06 | 0.99 | 1.08 | 0.70 |
| X019923 | BCG_0106  | 52   | 4  | 2  | 2  | 1.00 | 1.08 | 1.27 | 1.24 | 1.22 | 0.93 | 0.80 |
| X019923 | BCG_0108C | 217  | 5  | 5  | 5  | 1.00 | 0.81 | 0.84 | 0.96 | 0.87 | 1.23 | 0.78 |
| X019923 | BCG_0109  | 150  | 7  | 3  | 3  | 1.00 | 0.85 | 0.84 | 0.89 | 1.03 | 1.18 | 0.57 |
| X019923 | BCG_0110C | 156  | 6  | 3  | 3  | 1.00 | 0.71 | 1.08 | 1.03 | 1.04 | 1.40 | 0.62 |
| X019923 | BCG_0112  | 264  | 8  | 5  | 6  | 1.00 | 0.88 | 0.89 | 1.09 | 1.12 | 1.13 | 0.80 |
| X019923 | BCG_0113  | 254  | 4  | 4  | 4  | 1.00 | 0.96 | 0.93 | 1.11 | 1.03 | 1.04 | 0.87 |
| X019923 | BCG_0116  | 62   | 4  | 2  | 2  | 1.00 | 0.74 | 1.01 | 0.81 | 0.91 | 1.35 | 1.25 |

|         |           |      |    |    |    |      |      |      |      |      |      |      |
|---------|-----------|------|----|----|----|------|------|------|------|------|------|------|
| X019923 | BCG_0121  | 570  | 35 | 11 | 24 | 1.00 | 0.88 | 0.93 | 1.21 | 1.61 | 1.14 | 0.58 |
| X019923 | BCG_0123  | 280  | 10 | 6  | 7  | 1.00 | 0.80 | 0.72 | 0.94 | 0.83 | 1.25 | 0.83 |
| X019923 | BCG_0124  | 368  | 10 | 7  | 7  | 1.00 | 0.90 | 0.89 | 0.93 | 1.02 | 1.12 | 0.75 |
| X019923 | BCG_0125  | 571  | 23 | 14 | 15 | 1.00 | 1.04 | 0.95 | 1.04 | 0.98 | 0.97 | 1.12 |
| X019923 | BCG_0132  | 59   | 3  | 2  | 2  | 1.00 | 0.72 | 0.81 | 1.09 | 1.13 | 1.39 | 0.57 |
| X019923 | BCG_0135  | 102  | 5  | 2  | 2  | 1.00 | 1.49 | 1.12 | 1.45 | 1.40 | 0.67 | 1.23 |
| X019923 | BCG_0136C | 347  | 15 | 7  | 7  | 1.00 | 1.08 | 0.96 | 1.00 | 1.04 | 0.93 | 1.03 |
| X019923 | BCG_0140C | 987  | 39 | 23 | 24 | 1.00 | 0.88 | 0.77 | 0.81 | 0.74 | 1.13 | 1.00 |
| X019923 | BCG_0141C | 97   | 2  | 2  | 2  | 1.00 | 0.73 | 0.74 | 0.92 | 0.98 | 1.38 | 0.63 |
| X019923 | BCG_0144  | 96   | 10 | 3  | 3  | 1.00 | 0.90 | 0.92 | 1.42 | 1.09 | 1.12 | 0.90 |
| X019923 | BCG_0145  | 94   | 5  | 3  | 3  | 1.00 | 0.82 | 1.01 | 1.10 | 1.04 | 1.22 | 1.02 |
| X019923 | BCG_0151  | 171  | 7  | 5  | 6  | 1.00 | 0.80 | 0.92 | 1.26 | 1.08 | 1.26 | 0.95 |
| X019923 | BCG_0152C | 184  | 6  | 4  | 4  | 1.00 | 0.78 | 0.84 | 1.02 | 0.90 | 1.27 | 0.74 |
| X019923 | BCG_0153  | 334  | 15 | 7  | 8  | 1.00 | 0.79 | 0.94 | 0.96 | 1.31 | 1.27 | 0.77 |
| X019923 | BCG_0154C | 210  | 10 | 4  | 4  | 1.00 | 0.95 | 0.92 | 1.00 | 1.16 | 1.05 | 0.85 |
| X019923 | BCG_0155C | 469  | 39 | 10 | 25 | 1.00 | 0.84 | 0.70 | 0.85 | 0.70 | 1.20 | 3.58 |
| X019923 | BCG_0157  | 105  | 5  | 2  | 3  | 1.00 | 0.84 | 0.88 | 1.02 | 1.09 | 1.18 | 0.74 |
| X019923 | BCG_0160  | 786  | 26 | 14 | 18 | 1.00 | 0.84 | 0.89 | 0.99 | 0.98 | 1.19 | 0.82 |
| X019923 | BCG_0161  | 1033 | 34 | 18 | 26 | 1.00 | 0.89 | 0.91 | 1.12 | 1.19 | 1.12 | 0.77 |
| X019923 | BCG_0162  | 56   | 3  | 2  | 2  | 1.00 | 0.71 | 0.62 | 0.70 | 0.96 | 1.42 | 0.75 |
| X019923 | BCG_0163C | 123  | 4  | 4  | 4  | 1.00 | 0.89 | 1.01 | 1.02 | 1.02 | 1.13 | 0.75 |
| X019923 | BCG_0164  | 127  | 3  | 2  | 2  | 1.00 | 0.95 | 0.96 | 0.99 | 1.19 | 1.05 | 0.72 |
| X019923 | BCG_0165C | 556  | 19 | 11 | 17 | 1.00 | 0.77 | 0.76 | 0.85 | 0.85 | 1.29 | 0.91 |
| X019923 | BCG_0171C | 125  | 4  | 3  | 3  | 1.00 | 1.06 | 1.10 | 1.40 | 1.43 | 0.94 | 1.05 |
| X019923 | BCG_0172  | 333  | 12 | 5  | 5  | 1.00 | 0.93 | 0.80 | 0.83 | 0.79 | 1.08 | 0.76 |
| X019923 | BCG_0173C | 358  | 11 | 7  | 8  | 1.00 | 0.85 | 1.15 | 1.44 | 1.27 | 1.18 | 0.73 |
| X019923 | BCG_0174  | 141  | 4  | 3  | 3  | 1.00 | 1.07 | 1.00 | 1.14 | 1.25 | 0.94 | 0.91 |
| X019923 | BCG_0175  | 502  | 18 | 12 | 12 | 1.00 | 0.84 | 0.87 | 1.07 | 0.99 | 1.19 | 0.85 |
| X019923 | BCG_0177C | 128  | 3  | 3  | 3  | 1.00 | 0.77 | 0.80 | 0.95 | 1.18 | 1.30 | 0.61 |
| X019923 | BCG_0179C | 130  | 5  | 3  | 3  | 1.00 | 0.86 | 0.93 | 0.92 | 0.81 | 1.17 | 0.92 |
| X019923 | BCG_0180  | 246  | 11 | 6  | 6  | 1.00 | 0.85 | 0.95 | 1.13 | 1.22 | 1.17 | 0.88 |
| X019923 | BCG_0182  | 349  | 13 | 6  | 6  | 1.00 | 0.91 | 1.01 | 1.08 | 1.30 | 1.09 | 0.76 |
| X019923 | BCG_0183  | 1152 | 46 | 16 | 26 | 1.00 | 0.89 | 0.86 | 0.99 | 1.08 | 1.13 | 0.84 |
| X019923 | BCG_0184  | 1030 | 37 | 15 | 31 | 1.00 | 0.85 | 0.95 | 1.06 | 1.26 | 1.18 | 0.69 |
| X019923 | BCG_0185  | 106  | 5  | 4  | 4  | 1.00 | 0.86 | 0.98 | 0.91 | 1.12 | 1.17 | 0.94 |
| X019923 | BCG_0189C | 279  | 10 | 6  | 6  | 1.00 | 0.86 | 0.94 | 1.06 | 1.29 | 1.17 | 0.73 |
| X019923 | BCG_0190C | 608  | 20 | 10 | 14 | 1.00 | 0.85 | 0.90 | 1.07 | 1.17 | 1.18 | 0.87 |
| X019923 | BCG_0191  | 950  | 27 | 15 | 21 | 1.00 | 0.90 | 0.89 | 1.01 | 1.04 | 1.11 | 0.87 |
| X019923 | BCG_0193  | 518  | 20 | 10 | 16 | 1.00 | 0.85 | 0.81 | 0.87 | 0.86 | 1.17 | 0.89 |



|         |           |      |    |    |    |      |      |      |      |      |      |      |
|---------|-----------|------|----|----|----|------|------|------|------|------|------|------|
| X019923 | BCG_0194  | 183  | 8  | 4  | 4  | 1.00 | 1.04 | 1.03 | 1.19 | 1.30 | 0.96 | 0.84 |
| X019923 | BCG_0197  | 554  | 16 | 10 | 11 | 1.00 | 0.94 | 0.94 | 1.08 | 1.26 | 1.07 | 0.82 |
| X019923 | BCG_0199  | 53   | 2  | 2  | 2  | 1.00 | 0.52 | 0.93 | 1.21 | 0.86 | 1.93 | 0.75 |
| X019923 | BCG_0200  | 187  | 12 | 5  | 9  | 1.00 | 0.84 | 0.98 | 1.03 | 1.06 | 1.20 | 0.67 |
| X019923 | BCG_0204  | 125  | 5  | 2  | 2  | 1.00 | 0.76 | 1.02 | 1.02 | 0.99 | 1.32 | 1.00 |
| X019923 | BCG_0205  | 146  | 7  | 3  | 4  | 1.00 | 0.90 | 0.86 | 0.84 | 0.92 | 1.11 | 0.82 |
| X019923 | BCG_0206  | 349  | 12 | 5  | 6  | 1.00 | 0.79 | 0.80 | 0.80 | 0.82 | 1.27 | 0.83 |
| X019923 | BCG_0207  | 593  | 17 | 14 | 15 | 1.00 | 0.93 | 0.76 | 0.91 | 0.86 | 1.07 | 1.00 |
| X019923 | BCG_0208  | 408  | 17 | 9  | 9  | 1.00 | 0.84 | 0.81 | 0.88 | 0.88 | 1.19 | 0.87 |
| X019923 | BCG_0209  | 221  | 10 | 8  | 8  | 1.00 | 0.88 | 0.97 | 0.93 | 0.97 | 1.13 | 0.95 |
| X019923 | BCG_0210  | 673  | 22 | 13 | 16 | 1.00 | 0.86 | 0.87 | 0.85 | 0.82 | 1.17 | 0.94 |
| X019923 | BCG_0211  | 540  | 10 | 8  | 8  | 1.00 | 0.89 | 0.82 | 1.00 | 0.84 | 1.12 | 0.92 |
| X019923 | BCG_0212  | 325  | 8  | 5  | 6  | 1.00 | 0.97 | 0.98 | 1.11 | 1.18 | 1.03 | 0.90 |
| X019923 | BCG_0213  | 276  | 12 | 7  | 7  | 1.00 | 0.82 | 0.86 | 0.87 | 0.90 | 1.21 | 0.88 |
| X019923 | BCG_0214  | 288  | 11 | 6  | 6  | 1.00 | 0.88 | 0.93 | 0.97 | 0.95 | 1.14 | 0.97 |
| X019923 | BCG_0215  | 623  | 16 | 8  | 11 | 1.00 | 0.85 | 0.86 | 0.92 | 0.90 | 1.17 | 0.89 |
| X019923 | BCG_0217C | 402  | 13 | 7  | 9  | 1.00 | 0.86 | 0.85 | 0.87 | 0.93 | 1.16 | 0.84 |
| X019923 | BCG_0218C | 95   | 3  | 3  | 3  | 1.00 | 1.03 | 0.90 | 0.91 | 1.16 | 0.97 | 1.03 |
| X019923 | BCG_0219C | 155  | 7  | 6  | 6  | 1.00 | 0.56 | 0.99 | 1.06 | 1.25 | 1.78 | 1.00 |
| X019923 | BCG_0220  | 625  | 26 | 9  | 15 | 1.00 | 0.95 | 1.04 | 1.33 | 1.40 | 1.05 | 0.94 |
| X019923 | BCG_0221  | 62   | 8  | 2  | 2  | 1.00 | 0.71 | 0.71 | 0.97 | 1.13 | 1.41 | 0.82 |
| X019923 | BCG_0223  | 53   | 4  | 2  | 2  | 1.00 | 1.01 | 1.05 | 1.13 | 1.24 | 0.99 | 0.93 |
| X019923 | BCG_0224  | 255  | 7  | 6  | 7  | 1.00 | 0.85 | 0.94 | 1.08 | 1.25 | 1.17 | 0.73 |
| X019923 | BCG_0226C | 873  | 34 | 18 | 23 | 1.00 | 0.89 | 0.93 | 1.13 | 1.19 | 1.12 | 0.83 |
| X019923 | BCG_0227  | 268  | 14 | 5  | 9  | 1.00 | 0.93 | 0.96 | 1.16 | 1.17 | 1.08 | 0.69 |
| X019923 | BCG_0229  | 86   | 3  | 2  | 2  | 1.00 | 0.87 | 1.04 | 1.17 | 1.07 | 1.15 | 0.77 |
| X019923 | BCG_0235C | 976  | 35 | 18 | 23 | 1.00 | 0.93 | 1.03 | 1.18 | 1.34 | 1.07 | 0.81 |
| X019923 | BCG_0236  | 140  | 5  | 2  | 2  | 1.00 | 1.07 | 0.94 | 1.11 | 1.31 | 0.93 | 0.89 |
| X019923 | BCG_0237  | 77   | 3  | 2  | 3  | 1.00 | 1.01 | 0.98 | 1.31 | 1.22 | 0.99 | 1.01 |
| X019923 | BCG_0238C | 209  | 7  | 5  | 5  | 1.00 | 0.95 | 0.93 | 0.93 | 0.89 | 1.05 | 1.02 |
| X019923 | BCG_0239C | 677  | 16 | 10 | 11 | 1.00 | 0.95 | 0.90 | 0.83 | 0.81 | 1.06 | 1.09 |
| X019923 | BCG_0241C | 93   | 3  | 3  | 3  | 1.00 | 0.83 | 0.81 | 1.08 | 0.83 | 1.21 | 0.93 |
| X019923 | BCG_0242  | 311  | 6  | 5  | 5  | 1.00 | 0.71 | 0.76 | 0.82 | 0.71 | 1.41 | 0.78 |
| X019923 | BCG_0243C | 1191 | 44 | 23 | 30 | 1.00 | 0.91 | 0.83 | 0.87 | 0.84 | 1.10 | 0.94 |
| X019923 | BCG_0244C | 278  | 7  | 5  | 6  | 1.00 | 0.83 | 0.83 | 1.06 | 0.79 | 1.20 | 0.84 |
| X019923 | BCG_0248  | 852  | 29 | 16 | 21 | 1.00 | 0.93 | 1.02 | 1.20 | 1.37 | 1.08 | 0.74 |
| X019923 | BCG_0249C | 113  | 5  | 3  | 3  | 1.00 | 0.83 | 0.81 | 1.07 | 0.87 | 1.21 | 0.89 |
| X019923 | BCG_0250C | 66   | 4  | 2  | 2  | 1.00 | 0.76 | 0.78 | 0.72 | 0.99 | 1.31 | 1.22 |
| X019923 | BCG_0251  | 223  | 5  | 3  | 3  | 1.00 | 0.91 | 1.05 | 1.14 | 1.30 | 1.10 | 0.86 |

|         |           |      |    |    |    |      |      |      |      |      |      |      |
|---------|-----------|------|----|----|----|------|------|------|------|------|------|------|
| X019923 | BCG_0252C | 565  | 17 | 9  | 12 | 1.00 | 0.89 | 0.90 | 0.99 | 1.03 | 1.12 | 1.01 |
| X019923 | BCG_0253  | 565  | 22 | 11 | 17 | 1.00 | 0.92 | 1.02 | 1.19 | 1.40 | 1.08 | 0.80 |
| X019923 | BCG_0254C | 265  | 9  | 6  | 6  | 1.00 | 0.90 | 0.88 | 1.04 | 1.16 | 1.12 | 0.94 |
| X019923 | BCG_0257  | 286  | 11 | 4  | 4  | 1.00 | 0.65 | 0.64 | 0.74 | 0.78 | 1.54 | 0.71 |
| X019923 | BCG_0264C | 918  | 29 | 17 | 24 | 1.00 | 0.91 | 0.82 | 0.82 | 0.81 | 1.10 | 0.62 |
| X019923 | BCG_0266C | 174  | 5  | 3  | 3  | 1.00 | 0.94 | 1.00 | 1.14 | 1.14 | 1.06 | 0.69 |
| X019923 | BCG_0268  | 584  | 25 | 12 | 17 | 1.00 | 0.96 | 0.93 | 1.10 | 1.30 | 1.04 | 0.86 |
| X019923 | BCG_0271C | 705  | 15 | 11 | 11 | 1.00 | 0.87 | 0.89 | 1.02 | 1.17 | 1.15 | 0.74 |
| X019923 | BCG_0273C | 320  | 13 | 5  | 5  | 1.00 | 0.66 | 0.65 | 0.75 | 0.74 | 1.52 | 0.99 |
| X019923 | BCG_0275  | 461  | 14 | 8  | 10 | 1.00 | 0.92 | 0.87 | 1.01 | 1.10 | 1.08 | 0.84 |
| X019923 | BCG_0276  | 142  | 5  | 3  | 3  | 1.00 | 0.88 | 1.01 | 1.17 | 1.34 | 1.14 | 0.79 |
| X019923 | BCG_0279C | 360  | 10 | 7  | 7  | 1.00 | 0.95 | 0.83 | 0.91 | 1.15 | 1.05 | 0.66 |
| X019923 | BCG_0280C | 1800 | 56 | 26 | 46 | 1.00 | 0.95 | 0.99 | 1.07 | 1.22 | 1.05 | 0.83 |
| X019923 | BCG_0281  | 845  | 43 | 14 | 26 | 1.00 | 0.89 | 0.93 | 1.01 | 1.14 | 1.12 | 0.92 |
| X019923 | BCG_0282C | 921  | 24 | 13 | 16 | 1.00 | 0.93 | 0.99 | 1.12 | 1.24 | 1.08 | 0.80 |
| X019923 | BCG_0285C | 1115 | 58 | 21 | 45 | 1.00 | 0.91 | 0.88 | 1.02 | 1.08 | 1.10 | 0.89 |
| X019923 | BCG_0286C | 1856 | 98 | 35 | 68 | 1.00 | 0.87 | 0.89 | 0.95 | 1.00 | 1.15 | 0.87 |
| X019923 | BCG_0287C | 283  | 12 | 6  | 6  | 1.00 | 0.88 | 0.87 | 0.95 | 0.99 | 1.13 | 0.93 |
| X019923 | BCG_0288C | 283  | 8  | 6  | 6  | 1.00 | 0.97 | 0.91 | 1.15 | 1.16 | 1.03 | 0.66 |
| X019923 | BCG_0289C | 556  | 22 | 12 | 14 | 1.00 | 0.84 | 0.85 | 0.89 | 0.90 | 1.19 | 0.82 |
| X019923 | BCG_0292C | 66   | 3  | 2  | 2  | 1.00 | 0.91 | 0.96 | 1.55 | 1.36 | 1.10 | 0.82 |
| X019923 | BCG_0298C | 618  | 22 | 11 | 16 | 1.00 | 0.87 | 0.90 | 1.05 | 1.03 | 1.15 | 1.35 |
| X019923 | BCG_0300C | 215  | 6  | 4  | 4  | 1.00 | 0.95 | 0.91 | 1.06 | 0.92 | 1.05 | 0.96 |
| X019923 | BCG_0303C | 170  | 5  | 3  | 3  | 1.00 | 0.97 | 1.05 | 1.21 | 1.18 | 1.03 | 1.06 |
| X019923 | BCG_0304C | 244  | 17 | 5  | 5  | 1.00 | 0.99 | 1.02 | 0.95 | 1.19 | 1.01 | 1.01 |
| X019923 | BCG_0307C | 143  | 5  | 3  | 3  | 1.00 | 0.80 | 0.88 | 1.10 | 0.79 | 1.25 | 0.95 |
| X019923 | BCG_0308  | 982  | 38 | 17 | 22 | 1.00 | 0.89 | 0.92 | 1.09 | 1.29 | 1.13 | 0.85 |
| X019923 | BCG_0309C | 588  | 18 | 11 | 12 | 1.00 | 0.91 | 1.01 | 1.05 | 1.33 | 1.10 | 0.86 |
| X019923 | BCG_0310C | 199  | 8  | 7  | 7  | 1.00 | 0.87 | 0.85 | 1.14 | 1.27 | 1.16 | 0.68 |
| X019923 | BCG_0313C | 176  | 7  | 5  | 6  | 1.00 | 0.91 | 0.95 | 1.04 | 1.10 | 1.10 | 0.84 |
| X019923 | BCG_0315A | 87   | 4  | 2  | 2  | 1.00 | 0.79 | 0.93 | 0.90 | 0.98 | 1.27 | 0.57 |
| X019923 | BCG_0321  | 461  | 11 | 7  | 8  | 1.00 | 0.89 | 0.74 | 1.05 | 1.03 | 1.13 | 0.71 |
| X019923 | BCG_0322  | 187  | 7  | 5  | 5  | 1.00 | 1.09 | 1.17 | 1.15 | 1.23 | 0.91 | 0.99 |
| X019923 | BCG_0323  | 459  | 14 | 11 | 12 | 1.00 | 0.72 | 0.70 | 0.93 | 0.73 | 1.38 | 0.81 |
| X019923 | BCG_0324  | 862  | 28 | 19 | 19 | 1.00 | 0.70 | 0.70 | 0.70 | 0.61 | 1.42 | 0.89 |
| X019923 | BCG_0329  | 102  | 6  | 2  | 2  | 1.00 | 0.90 | 1.09 | 1.15 | 1.45 | 1.11 | 0.92 |
| X019923 | BCG_0330  | 197  | 8  | 5  | 6  | 1.00 | 0.88 | 0.78 | 0.93 | 0.80 | 1.14 | 0.98 |
| X019923 | BCG_0331  | 156  | 8  | 3  | 3  | 1.00 | 0.84 | 1.07 | 0.98 | 1.13 | 1.19 | 0.98 |
| X019923 | BCG_0332  | 459  | 13 | 8  | 10 | 1.00 | 0.87 | 0.86 | 0.97 | 0.95 | 1.15 | 1.04 |

|         |           |      |     |    |     |      |      |      |      |      |      |      |
|---------|-----------|------|-----|----|-----|------|------|------|------|------|------|------|
| X019923 | BCG_0333C | 141  | 5   | 3  | 3   | 1.00 | 0.81 | 0.82 | 0.87 | 0.78 | 1.23 | 0.77 |
| X019923 | BCG_0335C | 79   | 2   | 2  | 2   | 1.00 | 0.82 | 0.78 | 0.99 | 1.04 | 1.21 | 0.80 |
| X019923 | BCG_0336C | 297  | 11  | 8  | 8   | 1.00 | 0.80 | 0.96 | 1.07 | 1.16 | 1.25 | 0.78 |
| X019923 | BCG_0340  | 112  | 4   | 2  | 2   | 1.00 | 1.03 | 0.88 | 1.10 | 0.99 | 0.98 | 0.85 |
| X019923 | BCG_0343  | 173  | 6   | 5  | 5   | 1.00 | 0.87 | 0.88 | 1.10 | 1.18 | 1.14 | 0.91 |
| X019923 | BCG_0347C | 85   | 3   | 2  | 3   | 1.00 | 0.81 | 0.80 | 0.90 | 1.00 | 1.23 | 0.77 |
| X019923 | BCG_0348  | 137  | 7   | 4  | 6   | 1.00 | 0.85 | 0.90 | 0.98 | 0.99 | 1.17 | 0.91 |
| X019923 | BCG_0350C | 119  | 5   | 3  | 4   | 1.00 | 0.84 | 1.08 | 1.21 | 1.24 | 1.19 | 0.99 |
| X019923 | BCG_0351  | 116  | 3   | 3  | 3   | 1.00 | 0.80 | 0.86 | 1.37 | 1.33 | 1.25 | 0.67 |
| X019923 | BCG_0353  | 308  | 10  | 4  | 5   | 1.00 | 0.81 | 0.87 | 1.13 | 1.17 | 1.24 | 0.70 |
| X019923 | BCG_0355  | 159  | 4   | 2  | 2   | 1.00 | 0.93 | 0.86 | 1.09 | 1.09 | 1.08 | 0.59 |
| X019923 | BCG_0356  | 73   | 4   | 3  | 3   | 1.00 | 0.92 | 1.00 | 1.11 | 1.28 | 1.08 | 0.69 |
| X019923 | BCG_0357C | 314  | 10  | 7  | 9   | 1.00 | 1.06 | 1.00 | 1.12 | 1.01 | 0.94 | 1.05 |
| X019923 | BCG_0361  | 120  | 4   | 4  | 4   | 1.00 | 1.04 | 0.98 | 1.11 | 1.11 | 0.96 | 0.78 |
| X019923 | BCG_0367  | 101  | 5   | 3  | 4   | 1.00 | 0.74 | 0.81 | 0.94 | 1.02 | 1.36 | 0.73 |
| X019923 | BCG_0370  | 372  | 14  | 7  | 8   | 1.00 | 0.84 | 0.92 | 1.21 | 1.30 | 1.19 | 0.66 |
| X019923 | BCG_0371  | 155  | 7   | 4  | 4   | 1.00 | 1.10 | 0.97 | 1.31 | 1.40 | 0.91 | 1.00 |
| X019923 | BCG_0372  | 139  | 6   | 4  | 5   | 1.00 | 0.93 | 0.98 | 1.25 | 1.21 | 1.07 | 0.76 |
| X019923 | BCG_0373  | 318  | 10  | 7  | 9   | 1.00 | 1.04 | 0.90 | 1.23 | 1.32 | 0.96 | 0.87 |
| X019923 | BCG_0376C | 300  | 13  | 7  | 8   | 1.00 | 0.83 | 0.81 | 0.95 | 1.07 | 1.21 | 0.73 |
| X019923 | BCG_0377C | 988  | 42  | 19 | 29  | 1.00 | 0.94 | 0.84 | 0.82 | 0.87 | 1.07 | 1.06 |
| X019923 | BCG_0378C | 109  | 10  | 3  | 3   | 1.00 | 0.84 | 1.02 | 0.77 | 0.67 | 1.19 | 0.71 |
| X019923 | BCG_0381  | 171  | 11  | 4  | 4   | 1.00 | 0.92 | 0.96 | 1.32 | 1.37 | 1.09 | 1.00 |
| X019923 | BCG_0382  | 279  | 14  | 7  | 7   | 1.00 | 0.90 | 0.81 | 0.90 | 0.94 | 1.12 | 0.74 |
| X019923 | BCG_0385C | 219  | 9   | 6  | 7   | 1.00 | 0.72 | 0.77 | 0.86 | 0.94 | 1.40 | 0.96 |
| X019923 | BCG_0386  | 171  | 7   | 3  | 4   | 1.00 | 0.74 | 1.03 | 0.91 | 1.14 | 1.36 | 0.80 |
| X019923 | BCG_0387  | 129  | 5   | 4  | 5   | 1.00 | 0.89 | 0.95 | 1.06 | 1.12 | 1.12 | 0.78 |
| X019923 | BCG_0389  | 2709 | 219 | 44 | 141 | 1.00 | 0.90 | 0.84 | 0.89 | 0.87 | 1.11 | 0.84 |
| X019923 | BCG_0390  | 506  | 20  | 9  | 15  | 1.00 | 0.85 | 0.77 | 0.89 | 0.81 | 1.18 | 0.71 |
| X019923 | BCG_0391  | 790  | 30  | 14 | 21  | 1.00 | 0.91 | 0.88 | 0.98 | 0.94 | 1.09 | 0.90 |
| X019923 | BCG_0392  | 59   | 3   | 2  | 2   | 1.00 | 0.64 | 0.93 | 1.18 | 1.05 | 1.57 | 1.41 |
| X019923 | BCG_0394C | 83   | 8   | 2  | 4   | 1.00 | 0.76 | 0.77 | 1.30 | 1.20 | 1.31 | 0.71 |
| X019923 | BCG_0395C | 320  | 15  | 9  | 10  | 1.00 | 0.93 | 0.97 | 1.16 | 1.19 | 1.07 | 0.81 |
| X019923 | BCG_0396  | 346  | 15  | 7  | 8   | 1.00 | 0.93 | 0.90 | 0.97 | 0.93 | 1.07 | 0.89 |
| X019923 | BCG_0398C | 180  | 5   | 3  | 5   | 1.00 | 0.89 | 0.98 | 1.03 | 1.08 | 1.12 | 0.64 |
| X019923 | BCG_0399  | 197  | 9   | 5  | 5   | 1.00 | 0.93 | 0.96 | 1.02 | 1.06 | 1.07 | 0.95 |
| X019923 | BCG_0400  | 126  | 6   | 3  | 3   | 1.00 | 0.99 | 0.77 | 0.93 | 1.22 | 1.01 | 1.09 |
| X019923 | BCG_0401C | 752  | 37  | 13 | 31  | 1.00 | 0.90 | 0.91 | 1.05 | 1.16 | 1.11 | 0.80 |
| X019923 | BCG_0402  | 152  | 8   | 6  | 8   | 1.00 | 0.76 | 0.84 | 0.88 | 0.79 | 1.32 | 0.77 |

|         |           |      |    |    |    |      |      |      |      |      |      |      |
|---------|-----------|------|----|----|----|------|------|------|------|------|------|------|
| X019923 | BCG_0403C | 600  | 18 | 10 | 12 | 1.00 | 0.95 | 0.89 | 0.98 | 1.14 | 1.05 | 0.83 |
| X019923 | BCG_0417  | 308  | 12 | 4  | 9  | 1.00 | 0.93 | 0.96 | 1.12 | 1.30 | 1.08 | 0.72 |
| X019923 | BCG_0418C | 114  | 4  | 3  | 3  | 1.00 | 1.02 | 0.79 | 1.17 | 1.04 | 0.98 | 0.76 |
| X019923 | BCG_0420C | 66   | 5  | 2  | 2  | 1.00 | 0.77 | 0.95 | 1.12 | 1.32 | 1.31 | 0.93 |
| X019923 | BCG_0421C | 472  | 15 | 11 | 12 | 1.00 | 0.94 | 0.90 | 1.01 | 1.11 | 1.06 | 0.88 |
| X019923 | BCG_0422C | 1760 | 74 | 32 | 45 | 1.00 | 0.96 | 0.90 | 0.83 | 1.01 | 1.04 | 0.94 |
| X019923 | BCG_0424  | 258  | 12 | 6  | 6  | 1.00 | 0.74 | 0.74 | 0.67 | 0.67 | 1.35 | 0.97 |
| X019923 | BCG_0426  | 258  | 12 | 5  | 5  | 1.00 | 0.94 | 0.81 | 1.14 | 1.26 | 1.06 | 0.84 |
| X019923 | BCG_0427  | 96   | 4  | 3  | 3  | 1.00 | 0.88 | 0.94 | 1.12 | 1.05 | 1.14 | 0.71 |
| X019923 | BCG_0428  | 629  | 16 | 13 | 13 | 1.00 | 0.90 | 0.94 | 1.13 | 1.18 | 1.12 | 0.83 |
| X019923 | BCG_0429C | 94   | 3  | 2  | 2  | 1.00 | 0.82 | 0.82 | 1.07 | 0.89 | 1.21 | 0.76 |
| X019923 | BCG_0431C | 267  | 7  | 5  | 5  | 1.00 | 0.80 | 1.47 | 0.95 | 1.13 | 1.25 | 0.63 |
| X019923 | BCG_0437C | 1156 | 45 | 17 | 37 | 1.00 | 0.85 | 0.79 | 0.80 | 0.76 | 1.18 | 0.65 |
| X019923 | BCG_0442  | 96   | 4  | 2  | 2  | 1.00 | 0.71 | 0.83 | 0.91 | 1.03 | 1.41 | 0.70 |
| X019923 | BCG_0445C | 334  | 13 | 5  | 7  | 1.00 | 0.91 | 1.02 | 1.28 | 1.46 | 1.10 | 0.65 |
| X019923 | BCG_0446  | 585  | 15 | 11 | 11 | 1.00 | 0.84 | 0.90 | 1.05 | 1.18 | 1.19 | 0.70 |
| X019923 | BCG_0447  | 869  | 29 | 19 | 22 | 1.00 | 0.98 | 0.87 | 0.95 | 0.81 | 1.02 | 0.82 |
| X019923 | BCG_0449C | 502  | 20 | 11 | 11 | 1.00 | 0.97 | 0.90 | 1.12 | 1.05 | 1.03 | 0.94 |
| X019923 | BCG_0450C | 280  | 12 | 6  | 7  | 1.00 | 0.76 | 0.85 | 1.00 | 1.09 | 1.32 | 0.90 |
| X019923 | BCG_0451C | 538  | 15 | 10 | 10 | 1.00 | 0.81 | 0.86 | 0.95 | 1.01 | 1.24 | 0.97 |
| X019923 | BCG_0452  | 74   | 2  | 2  | 2  | 1.00 | 0.95 | 0.79 | 0.95 | 0.70 | 1.06 | 0.88 |
| X019923 | BCG_0453C | 154  | 7  | 4  | 4  | 1.00 | 0.78 | 0.91 | 1.03 | 1.11 | 1.28 | 0.84 |
| X019923 | BCG_0454  | 322  | 10 | 8  | 9  | 1.00 | 0.91 | 0.98 | 1.15 | 1.09 | 1.09 | 0.98 |
| X019923 | BCG_0456  | 155  | 4  | 3  | 3  | 1.00 | 1.14 | 0.98 | 1.24 | 1.13 | 0.87 | 0.79 |
| X019923 | BCG_0457  | 1081 | 27 | 19 | 22 | 1.00 | 0.85 | 0.78 | 0.88 | 0.96 | 1.17 | 0.86 |
| X019923 | BCG_0458  | 134  | 5  | 3  | 3  | 1.00 | 1.03 | 0.88 | 0.71 | 0.88 | 0.97 | 1.04 |
| X019923 | BCG_0460C | 246  | 5  | 4  | 5  | 1.00 | 0.80 | 0.96 | 0.99 | 1.17 | 1.25 | 0.67 |
| X019923 | BCG_0461C | 103  | 3  | 2  | 2  | 1.00 | 1.15 | 1.26 | 0.98 | 1.17 | 0.87 | 0.95 |
| X019923 | BCG_0462C | 609  | 24 | 13 | 17 | 1.00 | 0.86 | 0.90 | 1.04 | 1.11 | 1.16 | 0.78 |
| X019923 | BCG_0464C | 198  | 10 | 4  | 4  | 1.00 | 0.79 | 0.82 | 0.85 | 0.76 | 1.27 | 1.08 |
| X019923 | BCG_0466C | 388  | 13 | 9  | 10 | 1.00 | 0.89 | 0.98 | 1.46 | 1.20 | 1.12 | 0.79 |
| X019923 | BCG_0467C | 339  | 15 | 7  | 8  | 1.00 | 0.92 | 1.00 | 1.11 | 1.23 | 1.09 | 0.73 |
| X019923 | BCG_0468C | 229  | 6  | 3  | 4  | 1.00 | 0.85 | 0.93 | 1.01 | 1.14 | 1.18 | 0.66 |
| X019923 | BCG_0469  | 107  | 5  | 3  | 5  | 1.00 | 0.96 | 0.84 | 0.87 | 0.93 | 1.04 | 0.78 |
| X019923 | BCG_0470  | 172  | 6  | 3  | 4  | 1.00 | 0.88 | 0.93 | 1.04 | 0.86 | 1.14 | 0.84 |
| X019923 | BCG_0471  | 232  | 6  | 2  | 2  | 1.00 | 0.41 | 0.27 | 0.38 | 0.30 | 2.44 | 0.34 |
| X019923 | BCG_0472  | 526  | 16 | 10 | 12 | 1.00 | 0.89 | 0.98 | 1.15 | 1.26 | 1.12 | 0.92 |
| X019923 | BCG_0473  | 144  | 8  | 5  | 5  | 1.00 | 0.92 | 1.10 | 1.04 | 1.12 | 1.09 | 0.81 |
| X019923 | BCG_0474C | 666  | 23 | 16 | 17 | 1.00 | 0.87 | 0.87 | 1.13 | 1.10 | 1.15 | 0.88 |

|         |           |      |     |    |     |      |      |      |      |      |      |      |
|---------|-----------|------|-----|----|-----|------|------|------|------|------|------|------|
| X019923 | BCG_0475C | 58   | 3   | 2  | 2   | 1.00 | 1.02 | 1.02 | 1.15 | 1.23 | 0.98 | 0.91 |
| X019923 | BCG_0476C | 342  | 13  | 7  | 8   | 1.00 | 0.86 | 0.88 | 0.96 | 1.07 | 1.16 | 0.84 |
| X019923 | BCG_0477C | 130  | 4   | 4  | 4   | 1.00 | 0.91 | 1.00 | 1.13 | 1.18 | 1.10 | 0.79 |
| X019923 | BCG_0478C | 280  | 12  | 5  | 6   | 1.00 | 0.80 | 0.82 | 1.03 | 1.22 | 1.24 | 0.78 |
| X019923 | BCG_0479  | 3273 | 440 | 46 | 292 | 1.00 | 0.90 | 0.85 | 0.96 | 1.00 | 1.11 | 0.79 |
| X019923 | BCG_0480C | 57   | 2   | 2  | 2   | 1.00 | 0.66 | 0.77 | 1.11 | 0.86 | 1.51 | 0.68 |
| X019923 | BCG_0482  | 259  | 10  | 6  | 7   | 1.00 | 0.96 | 1.12 | 1.39 | 1.42 | 1.04 | 0.78 |
| X019923 | BCG_0485C | 137  | 6   | 4  | 5   | 1.00 | 0.91 | 0.90 | 1.01 | 1.02 | 1.10 | 1.16 |
| X019923 | BCG_0489C | 289  | 10  | 8  | 8   | 1.00 | 0.83 | 0.75 | 0.82 | 0.76 | 1.20 | 1.11 |
| X019923 | BCG_0497C | 525  | 21  | 12 | 12  | 1.00 | 0.91 | 1.07 | 1.16 | 1.31 | 1.10 | 0.77 |
| X019923 | BCG_0498  | 337  | 10  | 8  | 9   | 1.00 | 0.95 | 1.00 | 1.06 | 1.12 | 1.05 | 0.89 |
| X019923 | BCG_0502  | 1211 | 57  | 19 | 51  | 1.00 | 0.88 | 0.90 | 1.02 | 1.16 | 1.13 | 0.95 |
| X019923 | BCG_0504C | 699  | 41  | 11 | 27  | 1.00 | 0.91 | 0.84 | 1.07 | 0.95 | 1.10 | 0.78 |
| X019923 | BCG_0505C | 720  | 29  | 15 | 17  | 1.00 | 0.93 | 0.92 | 1.07 | 1.09 | 1.08 | 0.86 |
| X019923 | BCG_0506  | 415  | 19  | 9  | 13  | 1.00 | 0.87 | 0.93 | 1.03 | 1.06 | 1.15 | 0.83 |
| X019923 | BCG_0507  | 973  | 26  | 15 | 20  | 1.00 | 0.90 | 0.92 | 0.98 | 1.10 | 1.11 | 0.80 |
| X019923 | BCG_0508  | 798  | 30  | 11 | 21  | 1.00 | 0.90 | 0.93 | 1.00 | 1.12 | 1.11 | 0.85 |
| X019923 | BCG_0509  | 803  | 25  | 13 | 20  | 1.00 | 0.90 | 0.93 | 1.15 | 1.31 | 1.12 | 0.76 |
| X019923 | BCG_0510C | 923  | 46  | 11 | 21  | 1.00 | 0.89 | 0.84 | 0.85 | 0.83 | 1.12 | 1.76 |
| X019923 | BCG_0513C | 454  | 22  | 9  | 13  | 1.00 | 0.95 | 0.77 | 0.96 | 1.00 | 1.05 | 0.72 |
| X019923 | BCG_0514  | 572  | 22  | 12 | 13  | 1.00 | 0.91 | 0.86 | 0.97 | 0.87 | 1.10 | 0.99 |
| X019923 | BCG_0515  | 160  | 4   | 3  | 3   | 1.00 | 0.89 | 0.91 | 1.18 | 1.04 | 1.12 | 0.69 |
| X019923 | BCG_0516  | 945  | 55  | 13 | 26  | 1.00 | 0.92 | 0.92 | 1.09 | 1.30 | 1.08 | 0.69 |
| X019923 | BCG_0519  | 223  | 6   | 5  | 5   | 1.00 | 0.79 | 0.96 | 1.12 | 1.20 | 1.27 | 0.69 |
| X019923 | BCG_0520C | 427  | 14  | 7  | 9   | 1.00 | 0.87 | 0.87 | 0.92 | 1.06 | 1.15 | 1.07 |
| X019923 | BCG_0521C | 501  | 12  | 9  | 10  | 1.00 | 0.90 | 0.98 | 1.06 | 1.25 | 1.11 | 0.81 |
| X019923 | BCG_0523  | 127  | 4   | 3  | 3   | 1.00 | 1.17 | 0.88 | 1.03 | 1.23 | 0.85 | 0.83 |
| X019923 | BCG_0524  | 212  | 6   | 5  | 5   | 1.00 | 0.85 | 0.86 | 0.92 | 1.00 | 1.18 | 0.88 |
| X019923 | BCG_0525C | 442  | 12  | 7  | 7   | 1.00 | 0.92 | 0.83 | 1.02 | 1.12 | 1.09 | 0.72 |
| X019923 | BCG_0526  | 66   | 5   | 3  | 3   | 1.00 | 1.12 | 0.79 | 1.19 | 1.44 | 0.90 | 0.90 |
| X019923 | BCG_0528  | 106  | 2   | 2  | 2   | 1.00 | 0.85 | 0.89 | 1.00 | 1.06 | 1.17 | 0.64 |
| X019923 | BCG_0530  | 729  | 15  | 9  | 11  | 1.00 | 0.96 | 1.04 | 1.11 | 1.35 | 1.04 | 0.70 |
| X019923 | BCG_0531  | 688  | 21  | 15 | 18  | 1.00 | 0.84 | 0.83 | 0.99 | 0.88 | 1.19 | 0.89 |
| X019923 | BCG_0532  | 374  | 12  | 7  | 8   | 1.00 | 0.79 | 0.87 | 0.98 | 1.22 | 1.26 | 0.72 |
| X019923 | BCG_0535C | 125  | 7   | 5  | 5   | 1.00 | 0.83 | 1.04 | 0.93 | 1.32 | 1.20 | 0.69 |
| X019923 | BCG_0537C | 77   | 4   | 2  | 2   | 1.00 | 0.80 | 0.90 | 0.83 | 0.75 | 1.25 | 0.71 |
| X019923 | BCG_0539  | 437  | 13  | 7  | 9   | 1.00 | 0.93 | 0.84 | 0.98 | 1.05 | 1.07 | 0.91 |
| X019923 | BCG_0540  | 533  | 21  | 8  | 15  | 1.00 | 0.84 | 0.70 | 0.78 | 0.75 | 1.20 | 2.20 |
| X019923 | BCG_0542  | 285  | 13  | 5  | 7   | 1.00 | 0.85 | 0.84 | 0.99 | 0.90 | 1.18 | 0.74 |

|         |           |      |    |    |    |      |      |      |      |      |      |      |
|---------|-----------|------|----|----|----|------|------|------|------|------|------|------|
| X019923 | BCG_0543  | 158  | 6  | 3  | 4  | 1.00 | 0.63 | 0.82 | 0.95 | 1.12 | 1.58 | 0.71 |
| X019923 | BCG_0544  | 298  | 12 | 7  | 7  | 1.00 | 0.89 | 0.85 | 0.94 | 0.81 | 1.13 | 0.77 |
| X019923 | BCG_0545  | 271  | 11 | 5  | 7  | 1.00 | 0.89 | 0.81 | 0.96 | 0.94 | 1.12 | 0.93 |
| X019923 | BCG_0546C | 540  | 20 | 9  | 13 | 1.00 | 0.82 | 0.86 | 1.02 | 1.11 | 1.21 | 0.84 |
| X019923 | BCG_0547C | 208  | 9  | 4  | 6  | 1.00 | 0.94 | 0.97 | 1.16 | 1.39 | 1.06 | 0.75 |
| X019923 | BCG_0548C | 194  | 6  | 4  | 5  | 1.00 | 0.85 | 0.94 | 1.06 | 1.21 | 1.17 | 0.85 |
| X019923 | BCG_0551  | 134  | 4  | 3  | 3  | 1.00 | 1.01 | 1.01 | 1.26 | 1.11 | 0.99 | 0.85 |
| X019923 | BCG_0552  | 233  | 7  | 5  | 5  | 1.00 | 1.04 | 1.05 | 1.17 | 1.41 | 0.96 | 1.25 |
| X019923 | BCG_0553  | 527  | 12 | 8  | 9  | 1.00 | 0.86 | 0.96 | 1.16 | 1.22 | 1.16 | 0.77 |
| X019923 | BCG_0554  | 1042 | 35 | 17 | 21 | 1.00 | 0.91 | 0.89 | 1.01 | 1.13 | 1.10 | 0.77 |
| X019923 | BCG_0555  | 485  | 18 | 9  | 12 | 1.00 | 0.95 | 0.99 | 1.07 | 1.19 | 1.05 | 0.94 |
| X019923 | BCG_0556  | 377  | 12 | 8  | 9  | 1.00 | 0.85 | 0.89 | 1.06 | 1.15 | 1.18 | 0.83 |
| X019923 | BCG_0559C | 131  | 5  | 3  | 4  | 1.00 | 0.68 | 0.71 | 0.87 | 0.94 | 1.48 | 0.83 |
| X019923 | BCG_0560  | 136  | 5  | 3  | 3  | 1.00 | 0.97 | 0.94 | 1.10 | 0.89 | 1.03 | 0.88 |
| X019923 | BCG_0561  | 67   | 2  | 2  | 2  | 1.00 | 0.57 | 0.61 | 0.85 | 0.92 | 1.74 | 0.59 |
| X019923 | BCG_0566C | 312  | 13 | 5  | 10 | 1.00 | 0.74 | 0.77 | 0.99 | 1.05 | 1.35 | 0.49 |
| X019923 | BCG_0567  | 460  | 12 | 8  | 9  | 1.00 | 0.87 | 0.92 | 1.11 | 1.22 | 1.14 | 0.85 |
| X019923 | BCG_0568  | 324  | 10 | 7  | 7  | 1.00 | 0.97 | 1.01 | 1.34 | 1.43 | 1.03 | 0.82 |
| X019923 | BCG_0569  | 351  | 11 | 8  | 9  | 1.00 | 0.90 | 0.92 | 0.90 | 1.09 | 1.12 | 0.86 |
| X019923 | BCG_0570  | 63   | 2  | 2  | 2  | 1.00 | 0.84 | 0.79 | 0.98 | 0.95 | 1.19 | 0.94 |
| X019923 | BCG_0571  | 162  | 6  | 4  | 4  | 1.00 | 0.92 | 0.95 | 1.10 | 0.90 | 1.09 | 1.15 |
| X019923 | BCG_0572  | 128  | 6  | 3  | 5  | 1.00 | 0.82 | 0.87 | 0.93 | 0.95 | 1.22 | 0.88 |
| X019923 | BCG_0573  | 784  | 31 | 14 | 20 | 1.00 | 0.90 | 0.94 | 0.94 | 0.98 | 1.11 | 0.88 |
| X019923 | BCG_0577C | 182  | 9  | 3  | 4  | 1.00 | 0.84 | 0.86 | 0.92 | 1.18 | 1.19 | 0.86 |
| X019923 | BCG_0578C | 167  | 6  | 4  | 4  | 1.00 | 0.92 | 1.00 | 1.11 | 1.30 | 1.08 | 1.06 |
| X019923 | BCG_0579  | 311  | 11 | 5  | 9  | 1.00 | 1.21 | 0.57 | 0.97 | 0.74 | 0.83 | 3.76 |
| X019923 | BCG_0580  | 86   | 4  | 3  | 3  | 1.00 | 0.94 | 0.94 | 1.63 | 1.42 | 1.07 | 0.83 |
| X019923 | BCG_0581C | 254  | 10 | 5  | 5  | 1.00 | 0.89 | 0.88 | 0.92 | 0.93 | 1.12 | 1.08 |
| X019923 | BCG_0582  | 255  | 15 | 5  | 6  | 1.00 | 0.80 | 0.70 | 0.77 | 0.76 | 1.25 | 0.93 |
| X019923 | BCG_0583  | 198  | 7  | 4  | 5  | 1.00 | 0.74 | 0.78 | 1.14 | 1.02 | 1.35 | 0.98 |
| X019923 | BCG_0586C | 195  | 5  | 4  | 4  | 1.00 | 0.99 | 1.18 | 1.18 | 1.08 | 1.01 | 0.92 |
| X019923 | BCG_0587C | 135  | 7  | 4  | 5  | 1.00 | 0.82 | 0.78 | 0.93 | 0.93 | 1.22 | 0.52 |
| X019923 | BCG_0590C | 222  | 11 | 5  | 5  | 1.00 | 0.86 | 0.94 | 1.06 | 1.21 | 1.16 | 0.66 |
| X019923 | BCG_0591C | 484  | 9  | 8  | 8  | 1.00 | 0.72 | 0.85 | 1.07 | 1.24 | 1.39 | 0.75 |
| X019923 | BCG_0592C | 815  | 25 | 15 | 22 | 1.00 | 0.92 | 0.91 | 1.07 | 1.15 | 1.09 | 0.81 |
| X019923 | BCG_0596C | 103  | 7  | 2  | 2  | 1.00 | 0.80 | 0.90 | 0.93 | 1.21 | 1.25 | 0.79 |
| X019923 | BCG_0598  | 97   | 4  | 2  | 2  | 1.00 | 0.71 | 0.72 | 1.01 | 1.01 | 1.40 | 0.63 |
| X019923 | BCG_0599  | 226  | 8  | 4  | 4  | 1.00 | 0.83 | 1.01 | 1.10 | 1.26 | 1.20 | 0.85 |
| X019923 | BCG_0600  | 547  | 16 | 11 | 12 | 1.00 | 0.87 | 0.95 | 0.96 | 1.07 | 1.15 | 0.81 |

|         |           |      |    |    |    |      |      |      |      |      |      |      |
|---------|-----------|------|----|----|----|------|------|------|------|------|------|------|
| X019923 | BCG_0601  | 65   | 3  | 2  | 3  | 1.00 | 0.91 | 0.95 | 0.96 | 0.92 | 1.10 | 1.01 |
| X019923 | BCG_0602  | 67   | 3  | 2  | 2  | 1.00 | 0.77 | 0.88 | 0.82 | 0.86 | 1.30 | 0.68 |
| X019923 | BCG_0603  | 395  | 9  | 6  | 7  | 1.00 | 0.90 | 0.92 | 1.21 | 1.31 | 1.11 | 0.78 |
| X019923 | BCG_0606C | 121  | 7  | 2  | 2  | 1.00 | 0.98 | 0.63 | 0.75 | 0.82 | 1.02 | 0.81 |
| X019923 | BCG_0607  | 428  | 15 | 8  | 10 | 1.00 | 1.04 | 1.04 | 1.18 | 1.32 | 0.96 | 1.01 |
| X019923 | BCG_0608  | 175  | 5  | 3  | 3  | 1.00 | 1.00 | 1.01 | 1.11 | 1.18 | 1.00 | 1.05 |
| X019923 | BCG_0609C | 563  | 13 | 10 | 11 | 1.00 | 0.84 | 0.88 | 1.05 | 1.12 | 1.19 | 1.03 |
| X019923 | BCG_0610C | 112  | 8  | 4  | 4  | 1.00 | 1.05 | 0.90 | 1.16 | 1.06 | 0.96 | 0.87 |
| X019923 | BCG_0611C | 705  | 23 | 10 | 14 | 1.00 | 0.93 | 0.97 | 1.05 | 1.17 | 1.07 | 0.61 |
| X019923 | BCG_0612  | 333  | 9  | 9  | 9  | 1.00 | 0.91 | 0.85 | 0.92 | 0.84 | 1.10 | 0.88 |
| X019923 | BCG_0613  | 708  | 21 | 14 | 16 | 1.00 | 0.91 | 1.03 | 1.01 | 1.05 | 1.10 | 0.79 |
| X019923 | BCG_0614  | 226  | 6  | 5  | 5  | 1.00 | 0.88 | 0.91 | 1.04 | 1.14 | 1.14 | 0.61 |
| X019923 | BCG_0616C | 136  | 6  | 4  | 4  | 1.00 | 0.93 | 1.00 | 1.16 | 1.34 | 1.08 | 0.86 |
| X019923 | BCG_0621  | 398  | 11 | 9  | 10 | 1.00 | 0.88 | 0.95 | 1.23 | 1.35 | 1.14 | 0.73 |
| X019923 | BCG_0622  | 371  | 24 | 4  | 17 | 1.00 | 0.52 | 0.54 | 0.53 | 0.59 | 1.92 | 1.09 |
| X019923 | BCG_0625C | 568  | 28 | 11 | 19 | 1.00 | 0.90 | 0.88 | 1.10 | 1.19 | 1.11 | 0.84 |
| X019923 | BCG_0628C | 153  | 6  | 3  | 3  | 1.00 | 0.33 | 0.40 | 0.46 | 0.60 | 3.05 | 0.29 |
| X019923 | BCG_0630C | 104  | 6  | 2  | 2  | 1.00 | 0.68 | 0.71 | 0.78 | 0.84 | 1.47 | 0.85 |
| X019923 | BCG_0644C | 96   | 4  | 2  | 2  | 1.00 | 0.93 | 1.05 | 1.19 | 1.11 | 1.07 | 0.68 |
| X019923 | BCG_0645C | 177  | 3  | 3  | 3  | 1.00 | 0.98 | 1.01 | 1.08 | 1.12 | 1.02 | 0.74 |
| X019923 | BCG_0650  | 93   | 4  | 2  | 2  | 1.00 | 0.81 | 0.86 | 1.01 | 1.06 | 1.24 | 0.96 |
| X019923 | BCG_0660C | 871  | 28 | 21 | 22 | 1.00 | 0.91 | 0.89 | 0.82 | 0.86 | 1.10 | 1.01 |
| X019923 | BCG_0664  | 56   | 3  | 2  | 2  | 1.00 | 1.12 | 1.12 | 1.26 | 1.57 | 0.89 | 1.05 |
| X019923 | BCG_0666  | 39   | 3  | 2  | 2  | 1.00 | 1.22 | 0.78 | 1.46 | 1.11 | 0.82 | 1.64 |
| X019923 | BCG_0671C | 103  | 2  | 2  | 2  | 1.00 | 0.81 | 0.89 | 1.10 | 0.95 | 1.23 | 0.90 |
| X019923 | BCG_0679C | 98   | 4  | 3  | 3  | 1.00 | 1.12 | 0.87 | 1.22 | 1.11 | 0.89 | 0.90 |
| X019923 | BCG_0680C | 581  | 24 | 14 | 18 | 1.00 | 0.92 | 0.83 | 0.92 | 0.82 | 1.09 | 0.92 |
| X019923 | BCG_0681C | 189  | 13 | 4  | 12 | 1.00 | 0.84 | 0.79 | 0.96 | 0.79 | 1.19 | 1.44 |
| X019923 | BCG_0682  | 116  | 3  | 2  | 3  | 1.00 | 0.84 | 0.91 | 1.08 | 1.26 | 1.19 | 0.74 |
| X019923 | BCG_0683  | 201  | 20 | 6  | 11 | 1.00 | 0.86 | 0.85 | 0.91 | 0.85 | 1.16 | 0.65 |
| X019923 | BCG_0684  | 266  | 12 | 4  | 10 | 1.00 | 0.86 | 0.91 | 1.06 | 1.31 | 1.16 | 0.74 |
| X019923 | BCG_0685  | 460  | 18 | 8  | 14 | 1.00 | 0.88 | 0.97 | 1.11 | 1.32 | 1.14 | 0.69 |
| X019923 | BCG_0686  | 279  | 16 | 5  | 12 | 1.00 | 0.86 | 1.07 | 1.07 | 1.24 | 1.17 | 0.79 |
| X019923 | BCG_0687  | 135  | 9  | 5  | 7  | 1.00 | 0.78 | 0.88 | 0.87 | 0.93 | 1.28 | 0.85 |
| X019923 | BCG_0688  | 495  | 16 | 9  | 13 | 1.00 | 0.98 | 0.96 | 1.16 | 1.39 | 1.02 | 0.72 |
| X019923 | BCG_0689  | 607  | 47 | 12 | 37 | 1.00 | 0.92 | 0.84 | 0.94 | 0.85 | 1.08 | 0.81 |
| X019923 | BCG_0690  | 1140 | 92 | 18 | 63 | 1.00 | 0.87 | 0.79 | 0.91 | 0.77 | 1.15 | 0.79 |
| X019923 | BCG_0691C | 663  | 22 | 9  | 15 | 1.00 | 0.88 | 0.87 | 1.12 | 1.24 | 1.14 | 0.81 |
| X019923 | BCG_0692C | 357  | 8  | 7  | 7  | 1.00 | 0.81 | 0.82 | 0.97 | 0.86 | 1.23 | 0.86 |

|         |           |      |     |     |     |      |      |      |      |      |      |      |
|---------|-----------|------|-----|-----|-----|------|------|------|------|------|------|------|
| X019923 | BCG_0693C | 439  | 13  | 9   | 9   | 1.00 | 1.00 | 1.10 | 1.14 | 1.32 | 1.00 | 0.78 |
| X019923 | BCG_0694C | 148  | 4   | 4   | 4   | 1.00 | 0.93 | 0.92 | 1.33 | 1.19 | 1.07 | 0.87 |
| X019923 | BCG_0695C | 608  | 21  | 12  | 18  | 1.00 | 0.90 | 0.96 | 1.03 | 1.00 | 1.12 | 0.67 |
| X019923 | BCG_0696C | 982  | 31  | 20  | 25  | 1.00 | 0.90 | 0.86 | 1.02 | 1.28 | 1.11 | 0.81 |
| X019923 | BCG_0700  | 921  | 67  | 16  | 46  | 1.00 | 0.85 | 0.81 | 0.89 | 0.76 | 1.17 | 0.76 |
| X019923 | BCG_0701  | 633  | 62  | 10  | 43  | 1.00 | 0.84 | 0.73 | 0.82 | 0.76 | 1.19 | 0.72 |
| X019923 | BCG_0704  | 971  | 77  | 17  | 46  | 1.00 | 0.83 | 0.82 | 0.87 | 1.01 | 1.20 | 4.92 |
| X019923 | BCG_0712  | 764  | 27  | 14  | 16  | 1.00 | 0.93 | 0.85 | 0.93 | 0.86 | 1.08 | 0.84 |
| X019923 | BCG_0716  | 3879 | 212 | 66  | 141 | 1.00 | 0.77 | 0.73 | 0.70 | 0.64 | 1.30 | 0.90 |
| X019923 | BCG_0717  | 5910 | 289 | 102 | 220 | 1.00 | 0.76 | 0.72 | 0.70 | 0.66 | 1.31 | 0.90 |
| X019923 | BCG_0719  | 291  | 11  | 6   | 8   | 1.00 | 0.80 | 0.90 | 1.25 | 1.17 | 1.25 | 0.72 |
| X019923 | BCG_0721  | 419  | 19  | 10  | 11  | 1.00 | 0.94 | 0.91 | 1.05 | 0.98 | 1.06 | 0.89 |
| X019923 | BCG_0722  | 72   | 3   | 2   | 2   | 1.00 | 0.86 | 0.92 | 1.03 | 0.86 | 1.16 | 0.69 |
| X019923 | BCG_0724  | 407  | 17  | 8   | 11  | 1.00 | 0.87 | 0.84 | 1.00 | 0.94 | 1.15 | 0.76 |
| X019923 | BCG_0725C | 585  | 20  | 9   | 10  | 1.00 | 0.98 | 0.79 | 0.89 | 0.74 | 1.02 | 1.05 |
| X019923 | BCG_0726C | 382  | 14  | 5   | 12  | 1.00 | 0.93 | 0.87 | 0.93 | 1.04 | 1.08 | 0.85 |
| X019923 | BCG_0727  | 317  | 10  | 7   | 8   | 1.00 | 0.96 | 0.96 | 1.27 | 1.36 | 1.04 | 0.80 |
| X019923 | BCG_0730  | 115  | 4   | 3   | 4   | 1.00 | 0.88 | 0.72 | 1.03 | 1.08 | 1.14 | 0.96 |
| X019923 | BCG_0731  | 277  | 31  | 6   | 16  | 1.00 | 0.90 | 0.84 | 0.99 | 0.92 | 1.12 | 0.67 |
| X019923 | BCG_0732  | 947  | 88  | 16  | 48  | 1.00 | 0.95 | 0.87 | 0.96 | 0.88 | 1.05 | 0.83 |
| X019923 | BCG_0733  | 1707 | 72  | 30  | 50  | 1.00 | 0.93 | 0.94 | 1.06 | 1.15 | 1.07 | 0.81 |
| X019923 | BCG_0734  | 1595 | 129 | 21  | 82  | 1.00 | 0.89 | 0.92 | 1.12 | 1.30 | 1.13 | 0.71 |
| X019923 | BCG_0735  | 462  | 9   | 8   | 8   | 1.00 | 0.90 | 0.86 | 0.96 | 0.88 | 1.11 | 0.92 |
| X019923 | BCG_0736  | 139  | 7   | 3   | 4   | 1.00 | 0.84 | 0.86 | 1.19 | 1.05 | 1.19 | 0.74 |
| X019923 | BCG_0737  | 438  | 18  | 6   | 9   | 1.00 | 0.97 | 0.91 | 1.07 | 1.28 | 1.03 | 0.67 |
| X019923 | BCG_0739C | 182  | 5   | 4   | 4   | 1.00 | 0.81 | 0.88 | 0.97 | 0.94 | 1.23 | 0.71 |
| X019923 | BCG_0743  | 386  | 14  | 6   | 8   | 1.00 | 0.76 | 0.71 | 1.01 | 0.89 | 1.31 | 0.80 |
| X019923 | BCG_0750  | 646  | 50  | 12  | 35  | 1.00 | 0.86 | 0.82 | 0.87 | 0.84 | 1.16 | 0.72 |
| X019923 | BCG_0751  | 1006 | 74  | 15  | 57  | 1.00 | 0.95 | 0.87 | 0.99 | 0.88 | 1.05 | 0.81 |
| X019923 | BCG_0752  | 770  | 41  | 16  | 31  | 1.00 | 0.88 | 0.82 | 0.88 | 0.82 | 1.14 | 0.80 |
| X019923 | BCG_0753  | 478  | 45  | 8   | 23  | 1.00 | 0.93 | 0.78 | 0.88 | 0.79 | 1.08 | 0.74 |
| X019923 | BCG_0754  | 785  | 48  | 14  | 33  | 1.00 | 0.80 | 0.79 | 0.95 | 0.81 | 1.25 | 0.83 |
| X019923 | BCG_0755  | 377  | 27  | 8   | 23  | 1.00 | 0.86 | 0.84 | 0.88 | 0.79 | 1.16 | 0.70 |
| X019923 | BCG_0756  | 410  | 26  | 8   | 18  | 1.00 | 0.93 | 0.97 | 1.13 | 1.05 | 1.08 | 0.77 |
| X019923 | BCG_0757  | 1707 | 126 | 32  | 82  | 1.00 | 1.01 | 0.97 | 1.01 | 0.98 | 0.99 | 0.79 |
| X019923 | BCG_0758  | 411  | 26  | 5   | 10  | 1.00 | 0.96 | 0.97 | 1.15 | 1.13 | 1.04 | 0.75 |
| X019923 | BCG_0759  | 693  | 29  | 14  | 23  | 1.00 | 0.94 | 0.86 | 1.04 | 0.77 | 1.06 | 0.72 |
| X019923 | BCG_0760  | 744  | 55  | 13  | 47  | 1.00 | 0.90 | 0.87 | 0.98 | 0.85 | 1.11 | 0.81 |
| X019923 | BCG_0762  | 514  | 14  | 9   | 11  | 1.00 | 0.78 | 0.74 | 0.83 | 0.93 | 1.28 | 0.97 |



|         |           |      |    |    |    |      |      |      |      |      |      |      |
|---------|-----------|------|----|----|----|------|------|------|------|------|------|------|
| X019923 | BCG_0763  | 220  | 6  | 4  | 4  | 1.00 | 1.06 | 0.86 | 1.02 | 1.00 | 0.94 | 0.91 |
| X019923 | BCG_0764  | 744  | 48 | 15 | 37 | 1.00 | 0.86 | 0.84 | 0.90 | 0.79 | 1.17 | 0.76 |
| X019923 | BCG_0765  | 410  | 46 | 9  | 32 | 1.00 | 0.88 | 0.81 | 0.88 | 0.78 | 1.14 | 0.74 |
| X019923 | BCG_0766  | 892  | 62 | 17 | 47 | 1.00 | 0.90 | 0.83 | 0.92 | 0.84 | 1.11 | 0.83 |
| X019923 | BCG_0768  | 542  | 47 | 10 | 25 | 1.00 | 0.88 | 0.86 | 0.90 | 0.83 | 1.14 | 0.78 |
| X019923 | BCG_0769  | 772  | 47 | 13 | 36 | 1.00 | 0.87 | 0.77 | 0.80 | 0.77 | 1.14 | 0.75 |
| X019923 | BCG_0770  | 505  | 39 | 9  | 21 | 1.00 | 0.87 | 0.79 | 0.88 | 0.76 | 1.15 | 0.78 |
| X019923 | BCG_0771  | 1146 | 57 | 20 | 45 | 1.00 | 1.07 | 0.85 | 0.77 | 1.03 | 0.94 | 0.57 |
| X019923 | BCG_0772  | 289  | 12 | 6  | 10 | 1.00 | 0.81 | 0.80 | 0.85 | 0.81 | 1.23 | 0.72 |
| X019923 | BCG_0773  | 683  | 51 | 12 | 34 | 1.00 | 0.87 | 0.78 | 0.91 | 0.84 | 1.15 | 0.78 |
| X019923 | BCG_0774  | 749  | 36 | 15 | 15 | 1.00 | 0.94 | 0.89 | 0.97 | 1.05 | 1.06 | 0.84 |
| X019923 | BCG_0776C | 158  | 7  | 4  | 4  | 1.00 | 0.75 | 0.89 | 1.08 | 1.27 | 1.34 | 0.73 |
| X019923 | BCG_0780  | 634  | 18 | 10 | 15 | 1.00 | 0.95 | 0.97 | 1.18 | 1.29 | 1.05 | 0.81 |
| X019923 | BCG_0781C | 580  | 17 | 12 | 14 | 1.00 | 0.89 | 0.93 | 1.13 | 1.30 | 1.12 | 0.71 |
| X019923 | BCG_0782  | 436  | 26 | 9  | 15 | 1.00 | 0.84 | 0.77 | 0.83 | 0.87 | 1.19 | 0.87 |
| X019923 | BCG_0783  | 997  | 39 | 17 | 31 | 1.00 | 0.85 | 0.92 | 1.05 | 1.13 | 1.18 | 0.59 |
| X019923 | BCG_0784  | 227  | 7  | 5  | 6  | 1.00 | 1.08 | 1.18 | 1.32 | 1.26 | 0.93 | 0.86 |
| X019923 | BCG_0786  | 52   | 2  | 2  | 2  | 1.00 | 0.99 | 0.77 | 0.84 | 0.98 | 1.01 | 0.83 |
| X019923 | BCG_0788  | 240  | 6  | 4  | 5  | 1.00 | 0.75 | 0.77 | 0.95 | 0.90 | 1.34 | 0.75 |
| X019923 | BCG_0803C | 541  | 22 | 11 | 13 | 1.00 | 0.91 | 0.94 | 1.03 | 0.94 | 1.10 | 1.13 |
| X019923 | BCG_0804C | 882  | 26 | 15 | 22 | 1.00 | 0.89 | 0.92 | 1.03 | 1.15 | 1.13 | 0.86 |
| X019923 | BCG_0808C | 151  | 5  | 4  | 4  | 1.00 | 1.09 | 1.08 | 1.58 | 1.60 | 0.91 | 0.77 |
| X019923 | BCG_0809  | 614  | 17 | 9  | 11 | 1.00 | 0.84 | 0.83 | 0.98 | 1.12 | 1.19 | 0.76 |
| X019923 | BCG_0810  | 507  | 13 | 8  | 8  | 1.00 | 0.95 | 1.07 | 1.11 | 0.97 | 1.05 | 1.01 |
| X019923 | BCG_0811C | 222  | 6  | 5  | 6  | 1.00 | 0.96 | 0.85 | 1.02 | 0.81 | 1.05 | 1.37 |
| X019923 | BCG_0812C | 247  | 12 | 5  | 11 | 1.00 | 0.96 | 0.99 | 1.18 | 1.24 | 1.04 | 0.66 |
| X019923 | BCG_0813C | 934  | 43 | 12 | 28 | 1.00 | 0.89 | 1.00 | 1.15 | 1.32 | 1.12 | 0.88 |
| X019923 | BCG_0821  | 100  | 3  | 2  | 2  | 1.00 | 0.71 | 0.99 | 1.28 | 1.09 | 1.41 | 0.83 |
| X019923 | BCG_0822  | 240  | 9  | 4  | 5  | 1.00 | 0.92 | 0.87 | 1.36 | 1.28 | 1.09 | 0.80 |
| X019923 | BCG_0823  | 174  | 5  | 3  | 3  | 1.00 | 0.89 | 0.93 | 1.07 | 1.22 | 1.13 | 0.69 |
| X019923 | BCG_0824  | 1324 | 39 | 18 | 28 | 1.00 | 0.86 | 0.90 | 0.83 | 0.73 | 1.16 | 0.72 |
| X019923 | BCG_0825C | 260  | 13 | 6  | 7  | 1.00 | 0.79 | 0.99 | 1.13 | 1.14 | 1.26 | 0.90 |
| X019923 | BCG_0829  | 729  | 26 | 14 | 16 | 1.00 | 0.88 | 0.89 | 1.04 | 1.07 | 1.13 | 0.82 |
| X019923 | BCG_0830  | 82   | 6  | 3  | 3  | 1.00 | 1.06 | 1.05 | 0.87 | 0.97 | 0.95 | 1.19 |
| X019923 | BCG_0831C | 137  | 7  | 4  | 4  | 1.00 | 0.90 | 0.88 | 0.89 | 1.01 | 1.11 | 0.95 |
| X019923 | BCG_0832  | 607  | 18 | 14 | 17 | 1.00 | 0.86 | 0.92 | 1.19 | 1.25 | 1.16 | 0.77 |
| X019923 | BCG_0833  | 456  | 19 | 10 | 10 | 1.00 | 0.91 | 0.98 | 1.02 | 1.18 | 1.09 | 0.80 |
| X019923 | BCG_0835  | 372  | 18 | 8  | 11 | 1.00 | 0.91 | 0.82 | 0.91 | 1.06 | 1.09 | 0.77 |
| X019923 | BCG_0840  | 170  | 5  | 3  | 5  | 1.00 | 0.87 | 0.79 | 1.01 | 1.10 | 1.14 | 0.58 |

|         |           |      |    |    |    |      |      |      |      |      |      |      |
|---------|-----------|------|----|----|----|------|------|------|------|------|------|------|
| X019923 | BCG_0841  | 412  | 14 | 9  | 12 | 1.00 | 0.86 | 0.87 | 1.02 | 1.22 | 1.17 | 0.74 |
| X019923 | BCG_0844C | 254  | 9  | 5  | 5  | 1.00 | 1.11 | 1.03 | 1.31 | 1.18 | 0.90 | 0.92 |
| X019923 | BCG_0845C | 89   | 4  | 2  | 2  | 1.00 | 1.10 | 1.08 | 1.44 | 1.06 | 0.91 | 0.92 |
| X019923 | BCG_0850C | 922  | 30 | 13 | 20 | 1.00 | 0.84 | 0.71 | 0.80 | 0.65 | 1.19 | 0.83 |
| X019923 | BCG_0851C | 307  | 12 | 7  | 7  | 1.00 | 0.81 | 0.71 | 0.79 | 0.77 | 1.23 | 0.88 |
| X019923 | BCG_0852  | 442  | 18 | 10 | 12 | 1.00 | 0.94 | 0.80 | 0.95 | 0.92 | 1.06 | 0.88 |
| X019923 | BCG_0853  | 395  | 15 | 9  | 12 | 1.00 | 0.74 | 0.74 | 0.93 | 1.00 | 1.35 | 0.47 |
| X019923 | BCG_0854C | 283  | 12 | 6  | 7  | 1.00 | 0.90 | 0.95 | 0.98 | 1.14 | 1.11 | 0.87 |
| X019923 | BCG_0855  | 775  | 28 | 18 | 21 | 1.00 | 0.91 | 0.92 | 1.13 | 1.18 | 1.10 | 0.81 |
| X019923 | BCG_0856  | 126  | 3  | 2  | 2  | 1.00 | 0.85 | 0.74 | 0.83 | 0.79 | 1.18 | 0.76 |
| X019923 | BCG_0858C | 268  | 11 | 9  | 9  | 1.00 | 0.90 | 0.95 | 1.31 | 1.17 | 1.11 | 0.90 |
| X019923 | BCG_0860  | 337  | 9  | 6  | 7  | 1.00 | 0.97 | 0.84 | 1.10 | 1.04 | 1.03 | 0.95 |
| X019923 | BCG_0861  | 707  | 24 | 12 | 16 | 1.00 | 0.93 | 1.00 | 1.11 | 1.20 | 1.07 | 0.89 |
| X019923 | BCG_0862C | 92   | 2  | 2  | 2  | 1.00 | 0.94 | 0.99 | 1.01 | 0.94 | 1.06 | 0.42 |
| X019923 | BCG_0863C | 190  | 6  | 4  | 4  | 1.00 | 1.03 | 1.18 | 1.78 | 1.26 | 0.97 | 0.99 |
| X019923 | BCG_0864  | 156  | 7  | 4  | 4  | 1.00 | 0.94 | 0.81 | 1.14 | 1.12 | 1.06 | 0.73 |
| X019923 | BCG_0865C | 154  | 6  | 4  | 4  | 1.00 | 0.92 | 0.94 | 1.21 | 1.27 | 1.08 | 0.80 |
| X019923 | BCG_0866C | 480  | 14 | 5  | 9  | 1.00 | 0.95 | 0.90 | 1.04 | 1.07 | 1.06 | 0.60 |
| X019923 | BCG_0869C | 437  | 12 | 9  | 10 | 1.00 | 0.81 | 0.79 | 1.02 | 0.85 | 1.23 | 0.90 |
| X019923 | BCG_0870  | 490  | 21 | 10 | 12 | 1.00 | 0.86 | 0.89 | 1.03 | 1.26 | 1.16 | 0.83 |
| X019923 | BCG_0871  | 259  | 10 | 5  | 5  | 1.00 | 0.98 | 1.01 | 1.26 | 1.47 | 1.02 | 0.75 |
| X019923 | BCG_0874C | 274  | 8  | 5  | 5  | 1.00 | 0.91 | 0.88 | 1.01 | 1.31 | 1.10 | 0.62 |
| X019923 | BCG_0876C | 184  | 4  | 3  | 3  | 1.00 | 0.70 | 0.99 | 1.04 | 0.93 | 1.43 | 0.92 |
| X019923 | BCG_0877C | 970  | 45 | 18 | 34 | 1.00 | 0.88 | 0.95 | 1.10 | 1.32 | 1.14 | 0.78 |
| X019923 | BCG_0878C | 271  | 14 | 6  | 8  | 1.00 | 0.93 | 0.87 | 1.19 | 1.13 | 1.07 | 0.97 |
| X019923 | BCG_0883  | 347  | 10 | 8  | 10 | 1.00 | 0.85 | 0.94 | 1.06 | 1.25 | 1.17 | 0.76 |
| X019923 | BCG_0884C | 691  | 46 | 13 | 31 | 1.00 | 0.87 | 0.95 | 1.11 | 1.22 | 1.15 | 0.69 |
| X019923 | BCG_0891  | 204  | 7  | 4  | 4  | 1.00 | 0.74 | 0.89 | 1.02 | 1.12 | 1.36 | 0.79 |
| X019923 | BCG_0896C | 281  | 14 | 6  | 8  | 1.00 | 1.01 | 0.99 | 1.37 | 1.33 | 0.99 | 0.82 |
| X019923 | BCG_0897  | 424  | 15 | 6  | 7  | 1.00 | 0.87 | 0.77 | 0.93 | 0.83 | 1.15 | 0.83 |
| X019923 | BCG_0905C | 529  | 16 | 10 | 13 | 1.00 | 0.97 | 0.95 | 1.15 | 1.23 | 1.03 | 0.82 |
| X019923 | BCG_0910C | 138  | 8  | 3  | 3  | 1.00 | 0.82 | 0.92 | 1.16 | 1.18 | 1.21 | 0.71 |
| X019923 | BCG_0911  | 637  | 15 | 11 | 15 | 1.00 | 0.99 | 0.92 | 1.08 | 1.13 | 1.01 | 0.94 |
| X019923 | BCG_0912  | 1251 | 46 | 27 | 35 | 1.00 | 0.98 | 1.02 | 1.07 | 1.04 | 1.02 | 1.06 |
| X019923 | BCG_0913C | 178  | 7  | 4  | 4  | 1.00 | 0.94 | 0.99 | 0.82 | 0.72 | 1.07 | 0.83 |
| X019923 | BCG_0914C | 193  | 6  | 5  | 5  | 1.00 | 0.93 | 0.95 | 0.82 | 0.79 | 1.07 | 0.84 |
| X019923 | BCG_0923  | 464  | 26 | 10 | 15 | 1.00 | 0.86 | 0.81 | 0.89 | 0.85 | 1.16 | 0.74 |
| X019923 | BCG_0925  | 1581 | 47 | 29 | 37 | 1.00 | 0.92 | 0.89 | 0.96 | 0.98 | 1.09 | 0.91 |
| X019923 | BCG_0927C | 65   | 2  | 2  | 2  | 1.00 | 0.99 | 0.86 | 1.05 | 1.31 | 1.01 | 0.99 |

|         |           |     |    |    |    |      |      |      |      |      |      |      |
|---------|-----------|-----|----|----|----|------|------|------|------|------|------|------|
| X019923 | BCG_0928C | 142 | 8  | 3  | 3  | 1.00 | 0.84 | 0.97 | 0.97 | 1.04 | 1.19 | 0.81 |
| X019923 | BCG_0929  | 139 | 5  | 2  | 2  | 1.00 | 0.89 | 0.70 | 1.20 | 0.86 | 1.12 | 0.93 |
| X019923 | BCG_0932  | 227 | 11 | 5  | 6  | 1.00 | 0.89 | 1.08 | 1.16 | 1.42 | 1.12 | 0.72 |
| X019923 | BCG_0933  | 65  | 6  | 2  | 2  | 1.00 | 1.44 | 1.08 | 1.49 | 1.24 | 0.70 | 0.96 |
| X019923 | BCG_0936C | 383 | 12 | 7  | 9  | 1.00 | 0.85 | 0.86 | 1.02 | 1.12 | 1.18 | 0.65 |
| X019923 | BCG_0941C | 404 | 13 | 9  | 11 | 1.00 | 0.90 | 0.94 | 1.15 | 1.28 | 1.11 | 0.84 |
| X019923 | BCG_0942C | 268 | 11 | 6  | 6  | 1.00 | 0.90 | 0.72 | 0.80 | 0.81 | 1.11 | 1.03 |
| X019923 | BCG_0944  | 294 | 16 | 8  | 8  | 1.00 | 1.01 | 0.90 | 1.14 | 1.00 | 0.99 | 0.92 |
| X019923 | BCG_0945C | 90  | 3  | 3  | 3  | 1.00 | 1.00 | 1.09 | 1.14 | 1.52 | 1.00 | 0.98 |
| X019923 | BCG_0948  | 911 | 44 | 16 | 29 | 1.00 | 0.93 | 0.91 | 1.03 | 1.11 | 1.08 | 0.92 |
| X019923 | BCG_0949C | 67  | 3  | 2  | 2  | 1.00 | 1.05 | 1.15 | 1.10 | 1.01 | 0.95 | 1.17 |
| X019923 | BCG_0950C | 92  | 3  | 3  | 3  | 1.00 | 0.84 | 0.84 | 1.12 | 0.84 | 1.18 | 0.63 |
| X019923 | BCG_0951  | 185 | 7  | 3  | 3  | 1.00 | 0.84 | 0.89 | 1.15 | 1.06 | 1.19 | 0.84 |
| X019923 | BCG_0953  | 111 | 2  | 2  | 2  | 1.00 | 1.01 | 0.95 | 1.16 | 1.34 | 0.99 | 0.92 |
| X019923 | BCG_0954C | 409 | 11 | 9  | 9  | 1.00 | 0.88 | 0.87 | 1.02 | 1.11 | 1.14 | 0.91 |
| X019923 | BCG_0955C | 625 | 16 | 9  | 13 | 1.00 | 0.87 | 0.95 | 1.15 | 1.22 | 1.15 | 0.68 |
| X019923 | BCG_0956C | 418 | 18 | 10 | 10 | 1.00 | 0.92 | 0.99 | 1.15 | 1.18 | 1.09 | 0.98 |
| X019923 | BCG_0957  | 824 | 30 | 14 | 21 | 1.00 | 0.86 | 0.85 | 1.03 | 1.15 | 1.17 | 0.89 |
| X019923 | BCG_0958  | 128 | 6  | 4  | 4  | 1.00 | 0.89 | 1.06 | 1.43 | 1.45 | 1.13 | 0.94 |
| X019923 | BCG_0960  | 348 | 12 | 5  | 5  | 1.00 | 1.03 | 0.87 | 1.05 | 1.14 | 0.97 | 1.11 |
| X019923 | BCG_0962  | 179 | 5  | 4  | 4  | 1.00 | 0.98 | 0.86 | 1.05 | 1.23 | 1.02 | 0.95 |
| X019923 | BCG_0963  | 208 | 7  | 5  | 6  | 1.00 | 0.58 | 0.64 | 0.55 | 0.53 | 1.72 | 0.65 |
| X019923 | BCG_0966C | 92  | 5  | 2  | 2  | 1.00 | 0.76 | 0.72 | 0.74 | 0.79 | 1.31 | 0.78 |
| X019923 | BCG_0973  | 196 | 7  | 4  | 5  | 1.00 | 0.91 | 0.85 | 0.96 | 0.89 | 1.10 | 0.83 |
| X019923 | BCG_0975C | 419 | 15 | 9  | 10 | 1.00 | 0.91 | 0.89 | 1.11 | 1.09 | 1.10 | 0.86 |
| X019923 | BCG_0976C | 64  | 3  | 2  | 2  | 1.00 | 0.92 | 0.87 | 0.99 | 1.00 | 1.08 | 1.15 |
| X019923 | BCG_0977C | 388 | 18 | 7  | 9  | 1.00 | 0.82 | 0.94 | 0.98 | 1.15 | 1.21 | 0.77 |
| X019923 | BCG_0978C | 567 | 11 | 9  | 9  | 1.00 | 0.92 | 1.01 | 1.08 | 1.26 | 1.09 | 0.76 |
| X019923 | BCG_0979C | 384 | 15 | 8  | 11 | 1.00 | 0.86 | 0.92 | 1.12 | 1.25 | 1.17 | 0.74 |
| X019923 | BCG_0980  | 553 | 18 | 10 | 15 | 1.00 | 0.88 | 1.01 | 1.10 | 1.22 | 1.13 | 0.91 |
| X019923 | BCG_0983C | 54  | 2  | 2  | 2  | 1.00 | 0.71 | 0.79 | 0.73 | 0.81 | 1.41 | 0.63 |
| X019923 | BCG_0984C | 434 | 18 | 8  | 11 | 1.00 | 0.94 | 0.93 | 1.19 | 1.25 | 1.06 | 0.76 |
| X019923 | BCG_0985C | 329 | 12 | 6  | 7  | 1.00 | 0.90 | 0.98 | 1.03 | 1.16 | 1.12 | 0.81 |
| X019923 | BCG_0988  | 224 | 5  | 4  | 4  | 1.00 | 0.88 | 0.84 | 0.92 | 1.06 | 1.14 | 0.81 |
| X019923 | BCG_0991C | 365 | 13 | 7  | 8  | 1.00 | 0.86 | 0.79 | 1.04 | 0.82 | 1.16 | 0.81 |
| X019923 | BCG_0992  | 294 | 12 | 7  | 7  | 1.00 | 0.97 | 0.83 | 0.96 | 1.04 | 1.03 | 0.97 |
| X019923 | BCG_0993  | 101 | 6  | 2  | 2  | 1.00 | 0.88 | 1.02 | 0.98 | 0.97 | 1.14 | 0.91 |
| X019923 | BCG_0994C | 234 | 9  | 4  | 5  | 1.00 | 0.85 | 1.04 | 1.08 | 1.27 | 1.17 | 0.84 |
| X019923 | BCG_0995C | 154 | 5  | 5  | 5  | 1.00 | 0.88 | 0.74 | 1.08 | 1.15 | 1.13 | 0.71 |

|         |           |      |    |    |    |      |      |      |      |      |      |      |
|---------|-----------|------|----|----|----|------|------|------|------|------|------|------|
| X019923 | BCG_0999  | 296  | 11 | 8  | 10 | 1.00 | 0.98 | 0.80 | 0.90 | 0.95 | 1.02 | 0.81 |
| X019923 | BCG_1000C | 414  | 12 | 9  | 9  | 1.00 | 0.91 | 1.01 | 1.12 | 1.19 | 1.10 | 0.73 |
| X019923 | BCG_1003  | 455  | 18 | 11 | 12 | 1.00 | 0.73 | 0.79 | 0.91 | 0.74 | 1.38 | 0.72 |
| X019923 | BCG_1005  | 1118 | 50 | 20 | 37 | 1.00 | 0.89 | 0.95 | 1.13 | 1.29 | 1.12 | 0.71 |
| X019923 | BCG_1006  | 633  | 22 | 12 | 19 | 1.00 | 0.93 | 1.01 | 1.23 | 1.31 | 1.07 | 0.70 |
| X019923 | BCG_1010  | 227  | 5  | 4  | 4  | 1.00 | 0.91 | 0.94 | 1.17 | 1.22 | 1.10 | 0.64 |
| X019923 | BCG_1011  | 426  | 19 | 7  | 9  | 1.00 | 0.86 | 1.06 | 1.18 | 1.40 | 1.17 | 0.93 |
| X019923 | BCG_1012  | 597  | 18 | 13 | 13 | 1.00 | 0.81 | 0.90 | 1.01 | 1.01 | 1.23 | 0.80 |
| X019923 | BCG_1013  | 242  | 11 | 6  | 6  | 1.00 | 0.92 | 1.02 | 0.97 | 0.91 | 1.09 | 0.82 |
| X019923 | BCG_1021  | 106  | 4  | 2  | 3  | 1.00 | 0.89 | 0.89 | 0.98 | 1.11 | 1.13 | 0.69 |
| X019923 | BCG_1022  | 277  | 13 | 5  | 8  | 1.00 | 0.89 | 0.95 | 1.13 | 1.17 | 1.13 | 0.69 |
| X019923 | BCG_1023  | 1184 | 42 | 25 | 29 | 1.00 | 0.86 | 0.80 | 0.84 | 0.76 | 1.16 | 0.84 |
| X019923 | BCG_1025C | 100  | 4  | 2  | 3  | 1.00 | 0.98 | 1.16 | 1.23 | 1.55 | 1.02 | 0.97 |
| X019923 | BCG_1026C | 109  | 5  | 3  | 3  | 1.00 | 0.76 | 0.78 | 0.70 | 0.92 | 1.32 | 0.63 |
| X019923 | BCG_1027C | 549  | 13 | 11 | 12 | 1.00 | 0.87 | 0.79 | 1.01 | 0.79 | 1.15 | 0.88 |
| X019923 | BCG_1028C | 237  | 20 | 6  | 6  | 1.00 | 0.99 | 0.89 | 0.75 | 0.84 | 1.01 | 0.89 |
| X019923 | BCG_1034  | 133  | 15 | 3  | 8  | 1.00 | 0.55 | 0.59 | 0.65 | 0.67 | 1.81 | 0.60 |
| X019923 | BCG_1036  | 170  | 8  | 3  | 4  | 1.00 | 0.91 | 0.92 | 1.00 | 1.07 | 1.10 | 0.72 |
| X019923 | BCG_1037  | 247  | 13 | 5  | 5  | 1.00 | 0.83 | 0.89 | 0.98 | 1.07 | 1.20 | 0.92 |
| X019923 | BCG_1038  | 501  | 15 | 10 | 12 | 1.00 | 0.84 | 0.74 | 0.95 | 0.98 | 1.19 | 0.71 |
| X019923 | BCG_1039  | 535  | 13 | 8  | 11 | 1.00 | 0.88 | 0.98 | 1.14 | 1.27 | 1.13 | 0.77 |
| X019923 | BCG_1040C | 169  | 5  | 3  | 3  | 1.00 | 0.79 | 0.86 | 0.81 | 0.96 | 1.26 | 0.84 |
| X019923 | BCG_1041  | 51   | 3  | 2  | 2  | 1.00 | 0.73 | 0.95 | 0.93 | 0.79 | 1.36 | 0.91 |
| X019923 | BCG_1042  | 137  | 14 | 2  | 2  | 1.00 | 0.90 | 0.88 | 0.82 | 0.82 | 1.11 | 1.15 |
| X019923 | BCG_1043  | 98   | 4  | 2  | 2  | 1.00 | 0.83 | 0.92 | 0.84 | 1.02 | 1.21 | 1.02 |
| X019923 | BCG_1044C | 163  | 8  | 5  | 7  | 1.00 | 0.84 | 0.91 | 1.01 | 1.20 | 1.19 | 0.79 |
| X019923 | BCG_1046C | 203  | 10 | 5  | 7  | 1.00 | 0.94 | 0.99 | 1.05 | 1.22 | 1.06 | 0.68 |
| X019923 | BCG_1047C | 93   | 5  | 2  | 2  | 1.00 | 1.03 | 0.87 | 1.32 | 0.92 | 0.97 | 0.79 |
| X019923 | BCG_1048  | 188  | 7  | 4  | 4  | 1.00 | 0.92 | 0.94 | 1.08 | 1.39 | 1.08 | 0.94 |
| X019923 | BCG_1049  | 638  | 20 | 11 | 14 | 1.00 | 0.92 | 0.97 | 1.02 | 1.10 | 1.08 | 0.82 |
| X019923 | BCG_1050  | 432  | 20 | 10 | 16 | 1.00 | 0.90 | 0.91 | 0.99 | 1.06 | 1.11 | 0.98 |
| X019923 | BCG_1053  | 137  | 6  | 3  | 3  | 1.00 | 0.89 | 0.67 | 0.89 | 0.75 | 1.13 | 0.56 |
| X019923 | BCG_1058  | 670  | 15 | 12 | 13 | 1.00 | 0.90 | 0.91 | 1.04 | 1.19 | 1.11 | 0.83 |
| X019923 | BCG_1059C | 107  | 3  | 3  | 3  | 1.00 | 0.77 | 0.73 | 0.79 | 0.69 | 1.29 | 0.75 |
| X019923 | BCG_1060  | 296  | 10 | 8  | 8  | 1.00 | 1.02 | 0.92 | 0.93 | 1.05 | 0.98 | 0.84 |
| X019923 | BCG_1063  | 575  | 17 | 11 | 12 | 1.00 | 0.91 | 0.87 | 0.95 | 1.05 | 1.10 | 0.97 |
| X019923 | BCG_1064C | 702  | 17 | 14 | 15 | 1.00 | 0.83 | 0.93 | 1.19 | 1.34 | 1.20 | 0.74 |
| X019923 | BCG_1065  | 472  | 18 | 9  | 11 | 1.00 | 0.91 | 1.03 | 1.26 | 1.22 | 1.10 | 0.77 |
| X019923 | BCG_1067  | 509  | 21 | 10 | 12 | 1.00 | 0.98 | 0.81 | 0.84 | 1.06 | 1.02 | 0.74 |

|         |           |      |    |    |    |      |      |      |      |      |      |      |
|---------|-----------|------|----|----|----|------|------|------|------|------|------|------|
| X019923 | BCG_1068  | 92   | 4  | 3  | 3  | 1.00 | 0.99 | 0.97 | 1.15 | 1.18 | 1.01 | 1.00 |
| X019923 | BCG_1070  | 181  | 7  | 5  | 5  | 1.00 | 0.77 | 1.06 | 1.18 | 1.23 | 1.30 | 0.82 |
| X019923 | BCG_1071C | 194  | 6  | 4  | 4  | 1.00 | 1.02 | 1.02 | 1.07 | 1.17 | 0.98 | 0.67 |
| X019923 | BCG_1072C | 272  | 16 | 6  | 12 | 1.00 | 0.85 | 0.89 | 0.89 | 0.84 | 1.18 | 0.84 |
| X019923 | BCG_1074C | 978  | 44 | 18 | 30 | 1.00 | 0.97 | 0.94 | 1.06 | 1.25 | 1.03 | 0.85 |
| X019923 | BCG_1075C | 395  | 13 | 10 | 11 | 1.00 | 0.94 | 0.85 | 0.95 | 1.04 | 1.07 | 0.76 |
| X019923 | BCG_1077  | 607  | 25 | 13 | 14 | 1.00 | 0.75 | 0.84 | 0.81 | 0.75 | 1.34 | 1.02 |
| X019923 | BCG_1079  | 198  | 7  | 6  | 6  | 1.00 | 0.90 | 0.89 | 1.02 | 1.03 | 1.11 | 0.90 |
| X019923 | BCG_1080  | 1080 | 39 | 18 | 27 | 1.00 | 0.88 | 0.82 | 0.87 | 0.84 | 1.13 | 0.78 |
| X019923 | BCG_1081  | 127  | 9  | 4  | 4  | 1.00 | 0.86 | 0.73 | 0.74 | 1.01 | 1.16 | 0.65 |
| X019923 | BCG_1082  | 67   | 3  | 3  | 3  | 1.00 | 0.95 | 1.11 | 1.14 | 1.41 | 1.05 | 0.93 |
| X019923 | BCG_1083  | 381  | 9  | 6  | 6  | 1.00 | 0.75 | 0.90 | 1.02 | 1.07 | 1.33 | 0.70 |
| X019923 | BCG_1085C | 73   | 4  | 2  | 2  | 1.00 | 0.87 | 0.72 | 0.74 | 0.48 | 1.15 | 0.96 |
| X019923 | BCG_1108  | 200  | 13 | 4  | 4  | 1.00 | 0.95 | 0.90 | 1.02 | 0.97 | 1.05 | 0.91 |
| X019923 | BCG_1114  | 406  | 16 | 10 | 10 | 1.00 | 0.95 | 0.96 | 1.23 | 1.32 | 1.06 | 0.86 |
| X019923 | BCG_1116  | 366  | 15 | 7  | 8  | 1.00 | 1.22 | 1.08 | 1.37 | 1.34 | 0.82 | 1.08 |
| X019923 | BCG_1117  | 274  | 9  | 6  | 6  | 1.00 | 0.50 | 0.58 | 0.67 | 0.82 | 2.00 | 0.52 |
| X019923 | BCG_1118  | 320  | 13 | 7  | 9  | 1.00 | 0.84 | 0.88 | 1.12 | 1.27 | 1.19 | 0.67 |
| X019923 | BCG_1119  | 132  | 2  | 2  | 2  | 1.00 | 0.78 | 0.85 | 0.80 | 1.11 | 1.28 | 0.68 |
| X019923 | BCG_1121C | 229  | 10 | 5  | 6  | 1.00 | 1.11 | 0.89 | 1.25 | 1.05 | 0.90 | 0.93 |
| X019923 | BCG_1127C | 180  | 7  | 4  | 5  | 1.00 | 0.69 | 0.75 | 0.88 | 0.99 | 1.44 | 0.93 |
| X019923 | BCG_1128C | 431  | 20 | 7  | 14 | 1.00 | 0.89 | 0.88 | 1.06 | 1.11 | 1.13 | 1.03 |
| X019923 | BCG_1129C | 527  | 16 | 11 | 14 | 1.00 | 0.87 | 0.93 | 1.12 | 1.20 | 1.14 | 0.71 |
| X019923 | BCG_1130  | 70   | 4  | 2  | 2  | 1.00 | 0.85 | 0.77 | 0.93 | 0.92 | 1.17 | 0.88 |
| X019923 | BCG_1132C | 821  | 35 | 15 | 26 | 1.00 | 0.92 | 0.99 | 1.19 | 1.34 | 1.09 | 0.77 |
| X019923 | BCG_1135  | 746  | 16 | 10 | 13 | 1.00 | 0.86 | 0.76 | 0.86 | 1.00 | 1.17 | 0.86 |
| X019923 | BCG_1136  | 407  | 29 | 7  | 22 | 1.00 | 0.88 | 0.93 | 1.03 | 1.06 | 1.13 | 0.93 |
| X019923 | BCG_1137  | 482  | 16 | 8  | 11 | 1.00 | 0.89 | 0.85 | 1.10 | 1.12 | 1.13 | 0.79 |
| X019923 | BCG_1138C | 444  | 15 | 7  | 10 | 1.00 | 0.87 | 0.80 | 1.09 | 1.05 | 1.15 | 0.54 |
| X019923 | BCG_1140  | 649  | 29 | 12 | 17 | 1.00 | 0.85 | 0.84 | 0.94 | 0.94 | 1.18 | 0.81 |
| X019923 | BCG_1142  | 197  | 13 | 5  | 5  | 1.00 | 0.86 | 0.81 | 0.98 | 1.03 | 1.16 | 0.88 |
| X019923 | BCG_1152C | 185  | 9  | 5  | 6  | 1.00 | 1.13 | 1.09 | 1.27 | 1.49 | 0.89 | 1.02 |
| X019923 | BCG_1153  | 1104 | 53 | 18 | 38 | 1.00 | 0.90 | 0.94 | 1.11 | 1.24 | 1.11 | 0.78 |
| X019923 | BCG_1154  | 887  | 34 | 15 | 24 | 1.00 | 0.90 | 0.95 | 1.15 | 1.33 | 1.11 | 0.79 |
| X019923 | BCG_1155  | 166  | 8  | 6  | 6  | 1.00 | 0.94 | 0.86 | 0.91 | 0.96 | 1.06 | 0.99 |
| X019923 | BCG_1156  | 179  | 10 | 4  | 4  | 1.00 | 1.01 | 1.32 | 1.33 | 1.32 | 0.99 | 0.93 |
| X019923 | BCG_1157C | 166  | 6  | 3  | 4  | 1.00 | 0.96 | 1.02 | 1.06 | 1.21 | 1.04 | 1.11 |
| X019923 | BCG_1158C | 1273 | 54 | 24 | 38 | 1.00 | 0.89 | 0.92 | 1.00 | 1.11 | 1.13 | 0.79 |
| X019923 | BCG_1159C | 730  | 27 | 14 | 20 | 1.00 | 0.90 | 0.91 | 1.00 | 1.10 | 1.12 | 0.81 |

|         |           |      |     |    |    |      |      |      |      |      |      |      |
|---------|-----------|------|-----|----|----|------|------|------|------|------|------|------|
| X019923 | BCG_1160  | 99   | 5   | 3  | 3  | 1.00 | 0.91 | 0.71 | 1.13 | 1.06 | 1.10 | 0.80 |
| X019923 | BCG_1166C | 149  | 8   | 2  | 2  | 1.00 | 0.89 | 0.95 | 1.13 | 1.28 | 1.12 | 0.94 |
| X019923 | BCG_1168C | 650  | 15  | 11 | 11 | 1.00 | 0.85 | 0.87 | 0.86 | 0.88 | 1.17 | 0.85 |
| X019923 | BCG_1169C | 303  | 11  | 5  | 9  | 1.00 | 0.88 | 0.95 | 0.95 | 1.09 | 1.14 | 0.75 |
| X019923 | BCG_1170  | 154  | 6   | 4  | 4  | 1.00 | 0.74 | 0.80 | 0.95 | 1.10 | 1.36 | 0.65 |
| X019923 | BCG_1171C | 125  | 8   | 5  | 6  | 1.00 | 0.98 | 0.95 | 1.04 | 0.90 | 1.02 | 0.91 |
| X019923 | BCG_1172  | 338  | 10  | 7  | 7  | 1.00 | 0.96 | 0.96 | 1.33 | 1.43 | 1.05 | 0.79 |
| X019923 | BCG_1173  | 80   | 2   | 2  | 2  | 1.00 | 0.83 | 1.26 | 1.20 | 1.24 | 1.21 | 0.69 |
| X019923 | BCG_1179C | 337  | 17  | 9  | 11 | 1.00 | 0.89 | 0.78 | 0.93 | 0.98 | 1.12 | 0.65 |
| X019923 | BCG_1182  | 540  | 19  | 10 | 11 | 1.00 | 0.92 | 0.93 | 1.09 | 1.16 | 1.08 | 0.91 |
| X019923 | BCG_1183  | 571  | 27  | 12 | 17 | 1.00 | 0.88 | 0.92 | 1.05 | 1.16 | 1.14 | 0.74 |
| X019923 | BCG_1185  | 201  | 8   | 5  | 7  | 1.00 | 0.85 | 0.86 | 1.04 | 1.13 | 1.18 | 0.84 |
| X019923 | BCG_1186  | 246  | 16  | 5  | 5  | 1.00 | 0.88 | 0.83 | 1.05 | 0.97 | 1.13 | 0.71 |
| X019923 | BCG_1187C | 104  | 4   | 2  | 2  | 1.00 | 0.93 | 1.00 | 1.16 | 0.95 | 1.07 | 0.66 |
| X019923 | BCG_1188C | 137  | 16  | 2  | 2  | 1.00 | 1.22 | 0.87 | 1.01 | 1.49 | 0.82 | 1.02 |
| X019923 | BCG_1193  | 194  | 8   | 4  | 5  | 1.00 | 0.81 | 0.89 | 0.93 | 0.78 | 1.23 | 0.91 |
| X019923 | BCG_1194C | 2373 | 111 | 40 | 82 | 1.00 | 0.89 | 1.03 | 1.19 | 1.28 | 1.12 | 0.71 |
| X019923 | BCG_1201C | 65   | 2   | 2  | 2  | 1.00 | 0.66 | 0.69 | 0.85 | 0.76 | 1.52 | 0.70 |
| X019923 | BCG_1202  | 127  | 5   | 2  | 2  | 1.00 | 0.76 | 0.79 | 0.93 | 0.84 | 1.32 | 0.99 |
| X019923 | BCG_1203C | 380  | 9   | 6  | 7  | 1.00 | 0.88 | 0.90 | 1.09 | 1.03 | 1.13 | 2.47 |
| X019923 | BCG_1204C | 224  | 4   | 4  | 4  | 1.00 | 0.92 | 0.93 | 0.90 | 1.03 | 1.09 | 1.67 |
| X019923 | BCG_1205  | 198  | 7   | 3  | 3  | 1.00 | 0.87 | 1.02 | 1.27 | 1.38 | 1.15 | 0.90 |
| X019923 | BCG_1206  | 381  | 10  | 7  | 8  | 1.00 | 0.97 | 0.97 | 1.25 | 1.29 | 1.04 | 0.80 |
| X019923 | BCG_1207  | 149  | 13  | 3  | 3  | 1.00 | 0.94 | 0.65 | 3.16 | 0.83 | 1.07 | 0.74 |
| X019923 | BCG_1209C | 127  | 7   | 3  | 3  | 1.00 | 0.85 | 0.82 | 1.12 | 0.95 | 1.17 | 1.05 |
| X019923 | BCG_1212C | 213  | 4   | 4  | 4  | 1.00 | 0.79 | 0.88 | 1.12 | 1.15 | 1.27 | 0.74 |
| X019923 | BCG_1213  | 193  | 6   | 4  | 4  | 1.00 | 0.76 | 0.82 | 1.12 | 1.08 | 1.32 | 0.70 |
| X019923 | BCG_1217  | 110  | 8   | 4  | 4  | 1.00 | 0.83 | 0.97 | 0.90 | 1.25 | 1.20 | 0.54 |
| X019923 | BCG_1221C | 389  | 18  | 6  | 10 | 1.00 | 0.90 | 0.79 | 0.82 | 0.72 | 1.11 | 0.61 |
| X019923 | BCG_1222  | 130  | 3   | 3  | 3  | 1.00 | 0.78 | 0.85 | 1.07 | 0.99 | 1.28 | 0.67 |
| X019923 | BCG_1227  | 204  | 9   | 5  | 5  | 1.00 | 0.85 | 0.74 | 1.00 | 1.19 | 1.18 | 0.89 |
| X019923 | BCG_1228  | 307  | 8   | 6  | 6  | 1.00 | 0.72 | 0.74 | 1.12 | 0.80 | 1.39 | 0.70 |
| X019923 | BCG_1233  | 306  | 7   | 5  | 5  | 1.00 | 0.92 | 0.84 | 0.96 | 1.11 | 1.09 | 0.71 |
| X019923 | BCG_1241  | 410  | 12  | 7  | 10 | 1.00 | 0.97 | 1.08 | 1.21 | 1.40 | 1.03 | 0.91 |
| X019923 | BCG_1243  | 858  | 31  | 17 | 17 | 1.00 | 0.85 | 0.75 | 0.79 | 0.76 | 1.18 | 0.97 |
| X019923 | BCG_1247C | 104  | 3   | 3  | 3  | 1.00 | 1.02 | 0.94 | 1.22 | 1.14 | 0.98 | 0.82 |
| X019923 | BCG_1251  | 74   | 4   | 2  | 2  | 1.00 | 1.01 | 1.08 | 0.94 | 0.70 | 0.99 | 0.86 |
| X019923 | BCG_1252  | 614  | 20  | 12 | 17 | 1.00 | 0.92 | 0.86 | 1.01 | 1.04 | 1.09 | 0.77 |
| X019923 | BCG_1253  | 359  | 12  | 7  | 8  | 1.00 | 0.84 | 0.86 | 1.05 | 1.17 | 1.19 | 0.80 |

|         |           |      |     |    |    |      |      |      |      |      |      |      |
|---------|-----------|------|-----|----|----|------|------|------|------|------|------|------|
| X019923 | BCG_1260  | 57   | 2   | 2  | 2  | 1.00 | 0.59 | 0.66 | 0.71 | 0.79 | 1.69 | 0.75 |
| X019923 | BCG_1261C | 506  | 18  | 8  | 12 | 1.00 | 0.92 | 0.91 | 1.09 | 1.22 | 1.09 | 0.72 |
| X019923 | BCG_1262  | 455  | 15  | 11 | 12 | 1.00 | 0.89 | 0.99 | 1.19 | 1.27 | 1.13 | 0.84 |
| X019923 | BCG_1264C | 42   | 3   | 2  | 2  | 1.00 | 0.91 | 0.74 | 0.91 | 0.98 | 1.10 | 0.75 |
| X019923 | BCG_1266  | 767  | 25  | 14 | 17 | 1.00 | 0.91 | 0.87 | 0.96 | 0.96 | 1.10 | 0.83 |
| X019923 | BCG_1267  | 57   | 4   | 2  | 2  | 1.00 | 0.84 | 0.95 | 1.14 | 1.67 | 1.19 | 0.76 |
| X019923 | BCG_1269  | 151  | 6   | 3  | 3  | 1.00 | 0.93 | 0.79 | 0.92 | 0.92 | 1.07 | 0.91 |
| X019923 | BCG_1273  | 111  | 6   | 3  | 3  | 1.00 | 0.84 | 0.98 | 1.14 | 1.41 | 1.20 | 0.67 |
| X019923 | BCG_1275C | 605  | 27  | 10 | 10 | 1.00 | 0.86 | 0.90 | 0.96 | 1.04 | 1.16 | 0.82 |
| X019923 | BCG_1276C | 186  | 6   | 4  | 5  | 1.00 | 0.92 | 0.85 | 0.96 | 0.97 | 1.09 | 1.04 |
| X019923 | BCG_1277C | 324  | 8   | 5  | 6  | 1.00 | 0.80 | 0.81 | 0.87 | 0.85 | 1.25 | 0.96 |
| X019923 | BCG_1278C | 659  | 24  | 14 | 18 | 1.00 | 0.89 | 0.86 | 0.99 | 0.96 | 1.12 | 0.94 |
| X019923 | BCG_1280C | 99   | 11  | 2  | 4  | 1.00 | 0.91 | 0.85 | 1.02 | 1.06 | 1.09 | 0.86 |
| X019923 | BCG_1283  | 1575 | 42  | 25 | 34 | 1.00 | 0.89 | 0.80 | 0.83 | 0.81 | 1.12 | 0.82 |
| X019923 | BCG_1284  | 34   | 2   | 2  | 2  | 1.00 | 1.29 | 1.38 | 1.83 | 1.62 | 0.77 | 1.39 |
| X019923 | BCG_1289C | 549  | 20  | 12 | 14 | 1.00 | 0.83 | 0.83 | 0.90 | 0.86 | 1.21 | 0.79 |
| X019923 | BCG_1291C | 152  | 7   | 4  | 5  | 1.00 | 0.91 | 0.91 | 1.07 | 0.97 | 1.10 | 0.93 |
| X019923 | BCG_1294  | 365  | 12  | 6  | 8  | 1.00 | 0.90 | 0.86 | 0.99 | 0.86 | 1.12 | 0.99 |
| X019923 | BCG_1295  | 332  | 13  | 7  | 8  | 1.00 | 0.91 | 0.96 | 1.15 | 1.30 | 1.09 | 1.10 |
| X019923 | BCG_1296  | 103  | 3   | 2  | 2  | 1.00 | 0.65 | 0.43 | 0.56 | 0.63 | 1.53 | 0.63 |
| X019923 | BCG_1298  | 448  | 14  | 10 | 11 | 1.00 | 0.80 | 0.91 | 1.10 | 1.24 | 1.24 | 0.78 |
| X019923 | BCG_1299C | 232  | 12  | 5  | 6  | 1.00 | 0.88 | 0.93 | 1.03 | 0.98 | 1.14 | 1.12 |
| X019923 | BCG_1300  | 1148 | 45  | 16 | 30 | 1.00 | 0.86 | 0.95 | 1.12 | 1.27 | 1.17 | 0.66 |
| X019923 | BCG_1301  | 129  | 10  | 2  | 2  | 1.00 | 0.85 | 1.12 | 1.16 | 1.29 | 1.18 | 0.87 |
| X019923 | BCG_1302  | 90   | 3   | 2  | 2  | 1.00 | 0.86 | 0.85 | 0.87 | 1.10 | 1.17 | 0.68 |
| X019923 | BCG_1304  | 188  | 5   | 4  | 4  | 1.00 | 1.20 | 1.02 | 1.30 | 1.27 | 0.83 | 1.40 |
| X019923 | BCG_1305C | 660  | 21  | 11 | 16 | 1.00 | 0.93 | 0.95 | 1.12 | 1.28 | 1.07 | 0.82 |
| X019923 | BCG_1307C | 190  | 4   | 4  | 4  | 1.00 | 0.84 | 0.78 | 0.87 | 0.99 | 1.20 | 0.65 |
| X019923 | BCG_1308C | 2468 | 102 | 50 | 75 | 1.00 | 0.77 | 0.77 | 0.75 | 0.72 | 1.30 | 0.94 |
| X019923 | BCG_1309C | 64   | 4   | 2  | 2  | 1.00 | 0.81 | 0.51 | 0.63 | 0.67 | 1.23 | 0.67 |
| X019923 | BCG_1311C | 314  | 19  | 7  | 7  | 1.00 | 0.73 | 0.67 | 0.70 | 0.63 | 1.37 | 0.79 |
| X019923 | BCG_1312C | 90   | 3   | 2  | 3  | 1.00 | 0.97 | 0.83 | 1.20 | 1.22 | 1.03 | 0.73 |
| X019923 | BCG_1313  | 698  | 33  | 15 | 17 | 1.00 | 0.83 | 0.89 | 0.95 | 0.93 | 1.21 | 0.78 |
| X019923 | BCG_1314  | 68   | 4   | 2  | 2  | 1.00 | 0.90 | 0.65 | 0.81 | 0.89 | 1.12 | 0.97 |
| X019923 | BCG_1317  | 210  | 8   | 4  | 4  | 1.00 | 0.88 | 0.91 | 1.01 | 1.15 | 1.13 | 0.91 |
| X019923 | BCG_1318  | 342  | 12  | 7  | 8  | 1.00 | 0.95 | 0.83 | 0.93 | 0.88 | 1.05 | 0.90 |
| X019923 | BCG_1320C | 364  | 9   | 7  | 7  | 1.00 | 0.91 | 0.82 | 0.99 | 1.17 | 1.10 | 0.81 |
| X019923 | BCG_1321C | 171  | 5   | 3  | 5  | 1.00 | 0.69 | 0.77 | 0.89 | 0.95 | 1.44 | 0.74 |
| X019923 | BCG_1322  | 593  | 21  | 13 | 16 | 1.00 | 0.84 | 0.93 | 0.99 | 1.01 | 1.18 | 0.90 |

|         |           |      |     |    |    |      |      |      |      |      |      |      |
|---------|-----------|------|-----|----|----|------|------|------|------|------|------|------|
| X019923 | BCG_1323  | 214  | 6   | 4  | 4  | 1.00 | 0.75 | 1.07 | 1.17 | 1.19 | 1.33 | 0.77 |
| X019923 | BCG_1324  | 262  | 10  | 5  | 7  | 1.00 | 0.81 | 0.83 | 0.88 | 0.84 | 1.23 | 0.83 |
| X019923 | BCG_1325C | 210  | 9   | 5  | 5  | 1.00 | 0.86 | 0.84 | 0.94 | 0.97 | 1.16 | 0.89 |
| X019923 | BCG_1326C | 577  | 17  | 13 | 15 | 1.00 | 0.89 | 0.92 | 1.06 | 1.18 | 1.12 | 0.80 |
| X019923 | BCG_1328C | 186  | 4   | 4  | 4  | 1.00 | 0.92 | 0.80 | 0.98 | 0.94 | 1.09 | 0.84 |
| X019923 | BCG_1329C | 440  | 9   | 6  | 7  | 1.00 | 0.88 | 0.91 | 1.03 | 1.20 | 1.14 | 0.83 |
| X019923 | BCG_1331C | 66   | 2   | 2  | 2  | 1.00 | 0.78 | 0.82 | 1.58 | 0.83 | 1.29 | 0.72 |
| X019923 | BCG_1333  | 156  | 8   | 4  | 7  | 1.00 | 0.86 | 0.79 | 0.87 | 0.84 | 1.16 | 0.89 |
| X019923 | BCG_1334  | 619  | 30  | 11 | 25 | 1.00 | 0.93 | 0.90 | 1.02 | 0.97 | 1.07 | 1.06 |
| X019923 | BCG_1335C | 186  | 5   | 4  | 4  | 1.00 | 0.88 | 0.95 | 0.90 | 1.13 | 1.13 | 0.84 |
| X019923 | BCG_1336  | 210  | 6   | 5  | 5  | 1.00 | 0.94 | 0.91 | 1.11 | 1.02 | 1.06 | 1.04 |
| X019923 | BCG_1337  | 379  | 12  | 7  | 7  | 1.00 | 0.91 | 0.74 | 0.78 | 0.67 | 1.09 | 1.00 |
| X019923 | BCG_1338  | 594  | 21  | 13 | 14 | 1.00 | 0.91 | 0.88 | 1.01 | 1.04 | 1.10 | 0.79 |
| X019923 | BCG_1339C | 374  | 13  | 8  | 8  | 1.00 | 0.91 | 0.96 | 1.01 | 1.08 | 1.10 | 0.91 |
| X019923 | BCG_1340C | 793  | 30  | 15 | 19 | 1.00 | 1.06 | 0.89 | 0.97 | 2.96 | 0.94 | 1.01 |
| X019923 | BCG_1342C | 257  | 7   | 4  | 5  | 1.00 | 0.84 | 0.72 | 0.83 | 0.83 | 1.19 | 0.74 |
| X019923 | BCG_1343  | 287  | 13  | 6  | 6  | 1.00 | 0.88 | 0.93 | 1.13 | 1.22 | 1.14 | 0.73 |
| X019923 | BCG_1344  | 178  | 6   | 4  | 4  | 1.00 | 0.94 | 0.87 | 1.15 | 1.19 | 1.06 | 0.91 |
| X019923 | BCG_1345  | 196  | 9   | 6  | 6  | 1.00 | 0.87 | 0.86 | 0.81 | 0.94 | 1.14 | 0.86 |
| X019923 | BCG_1346  | 138  | 5   | 3  | 3  | 1.00 | 0.80 | 0.83 | 0.96 | 0.95 | 1.25 | 0.54 |
| X019923 | BCG_1348  | 67   | 3   | 2  | 2  | 1.00 | 0.82 | 0.95 | 1.03 | 1.20 | 1.21 | 1.00 |
| X019923 | BCG_1349C | 213  | 8   | 7  | 7  | 1.00 | 0.93 | 0.95 | 1.03 | 1.05 | 1.07 | 0.98 |
| X019923 | BCG_1352  | 771  | 24  | 15 | 16 | 1.00 | 0.84 | 0.92 | 1.12 | 1.14 | 1.19 | 0.71 |
| X019923 | BCG_1353  | 611  | 14  | 10 | 12 | 1.00 | 0.85 | 0.90 | 1.14 | 1.23 | 1.18 | 0.82 |
| X019923 | BCG_1354  | 724  | 24  | 13 | 19 | 1.00 | 0.91 | 0.84 | 0.93 | 0.87 | 1.10 | 0.83 |
| X019923 | BCG_1355  | 558  | 19  | 9  | 12 | 1.00 | 0.96 | 1.01 | 1.18 | 1.37 | 1.04 | 0.76 |
| X019923 | BCG_1356  | 177  | 8   | 3  | 3  | 1.00 | 0.46 | 0.59 | 0.56 | 0.65 | 2.18 | 0.33 |
| X019923 | BCG_1357  | 1961 | 84  | 36 | 67 | 1.00 | 0.97 | 0.93 | 0.95 | 0.80 | 1.04 | 0.71 |
| X019923 | BCG_1358  | 127  | 8   | 3  | 5  | 1.00 | 0.96 | 1.00 | 1.03 | 0.81 | 1.04 | 0.74 |
| X019923 | BCG_1359  | 400  | 13  | 8  | 9  | 1.00 | 0.89 | 0.94 | 1.19 | 1.30 | 1.12 | 0.69 |
| X019923 | BCG_1361  | 100  | 3   | 3  | 3  | 1.00 | 0.89 | 0.93 | 1.09 | 1.16 | 1.13 | 0.74 |
| X019923 | BCG_1363  | 111  | 8   | 2  | 2  | 1.00 | 0.84 | 0.97 | 1.01 | 1.04 | 1.19 | 0.85 |
| X019923 | BCG_1364  | 137  | 9   | 3  | 7  | 1.00 | 0.85 | 0.77 | 0.76 | 0.86 | 1.18 | 0.88 |
| X019923 | BCG_1366  | 489  | 24  | 11 | 18 | 1.00 | 0.83 | 0.78 | 0.89 | 0.85 | 1.21 | 0.88 |
| X019923 | BCG_1367  | 1463 | 54  | 23 | 37 | 1.00 | 0.87 | 0.82 | 0.86 | 0.81 | 1.15 | 0.87 |
| X019923 | BCG_1368  | 1822 | 103 | 34 | 77 | 1.00 | 0.87 | 0.87 | 0.93 | 0.95 | 1.15 | 0.84 |
| X019923 | BCG_1369  | 952  | 38  | 15 | 27 | 1.00 | 0.93 | 0.85 | 0.96 | 1.05 | 1.08 | 0.94 |
| X019923 | BCG_1370  | 1397 | 65  | 22 | 50 | 1.00 | 0.90 | 0.88 | 0.98 | 1.03 | 1.11 | 0.80 |
| X019923 | BCG_1371  | 263  | 11  | 5  | 7  | 1.00 | 0.85 | 0.79 | 0.86 | 0.94 | 1.18 | 0.73 |



|         |           |      |    |    |    |      |      |      |      |      |      |      |
|---------|-----------|------|----|----|----|------|------|------|------|------|------|------|
| X019923 | BCG_1372  | 75   | 4  | 2  | 2  | 1.00 | 1.06 | 1.02 | 1.34 | 1.32 | 0.94 | 0.86 |
| X019923 | BCG_1375C | 106  | 5  | 2  | 3  | 1.00 | 1.05 | 0.91 | 0.70 | 0.81 | 0.96 | 0.77 |
| X019923 | BCG_1376  | 503  | 12 | 9  | 10 | 1.00 | 0.91 | 0.89 | 1.01 | 1.03 | 1.10 | 0.95 |
| X019923 | BCG_1377C | 117  | 2  | 2  | 2  | 1.00 | 0.73 | 0.94 | 1.05 | 1.22 | 1.37 | 0.70 |
| X019923 | BCG_1378C | 50   | 5  | 2  | 2  | 1.00 | 0.69 | 0.92 | 0.74 | 0.99 | 1.44 | 0.56 |
| X019923 | BCG_1379C | 286  | 11 | 3  | 3  | 1.00 | 0.76 | 0.80 | 0.81 | 0.84 | 1.31 | 1.10 |
| X019923 | BCG_1380C | 217  | 9  | 6  | 6  | 1.00 | 0.90 | 0.84 | 0.88 | 0.99 | 1.11 | 0.95 |
| X019923 | BCG_1381C | 238  | 11 | 4  | 5  | 1.00 | 0.85 | 0.82 | 0.85 | 0.81 | 1.18 | 0.84 |
| X019923 | BCG_1384C | 202  | 8  | 5  | 6  | 1.00 | 0.95 | 1.04 | 1.22 | 1.23 | 1.05 | 0.78 |
| X019923 | BCG_1385  | 986  | 32 | 15 | 20 | 1.00 | 0.91 | 0.90 | 1.06 | 1.20 | 1.10 | 0.81 |
| X019923 | BCG_1386  | 545  | 14 | 9  | 12 | 1.00 | 0.94 | 1.00 | 1.19 | 1.40 | 1.07 | 0.83 |
| X019923 | BCG_1388C | 618  | 18 | 13 | 14 | 1.00 | 0.86 | 0.89 | 1.04 | 1.15 | 1.16 | 0.96 |
| X019923 | BCG_1389C | 1303 | 51 | 22 | 34 | 1.00 | 0.91 | 0.82 | 0.84 | 0.89 | 1.10 | 2.91 |
| X019923 | BCG_1390  | 1241 | 43 | 27 | 34 | 1.00 | 0.86 | 0.83 | 0.76 | 0.90 | 1.16 | 0.90 |
| X019923 | BCG_1392C | 116  | 5  | 4  | 4  | 1.00 | 0.82 | 0.97 | 0.98 | 1.23 | 1.22 | 0.88 |
| X019923 | BCG_1393  | 52   | 2  | 2  | 2  | 1.00 | 0.92 | 0.61 | 0.76 | 0.92 | 1.08 | 0.81 |
| X019923 | BCG_1395  | 223  | 8  | 5  | 6  | 1.00 | 0.87 | 0.90 | 0.94 | 0.98 | 1.15 | 0.78 |
| X019923 | BCG_1396  | 139  | 5  | 2  | 3  | 1.00 | 0.98 | 0.85 | 0.78 | 1.24 | 1.02 | 0.81 |
| X019923 | BCG_1398  | 234  | 8  | 4  | 4  | 1.00 | 0.90 | 1.00 | 1.12 | 1.19 | 1.12 | 0.85 |
| X019923 | BCG_1399  | 108  | 6  | 3  | 4  | 1.00 | 0.87 | 0.86 | 0.93 | 0.85 | 1.15 | 0.93 |
| X019923 | BCG_1400  | 140  | 4  | 3  | 3  | 1.00 | 0.81 | 0.72 | 0.75 | 1.08 | 1.23 | 0.71 |
| X019923 | BCG_1401  | 330  | 8  | 6  | 7  | 1.00 | 0.90 | 0.97 | 1.11 | 1.24 | 1.11 | 0.89 |
| X019923 | BCG_1402  | 204  | 8  | 3  | 5  | 1.00 | 0.99 | 0.98 | 1.17 | 1.32 | 1.01 | 0.90 |
| X019923 | BCG_1403  | 119  | 6  | 4  | 4  | 1.00 | 0.89 | 1.03 | 1.20 | 1.27 | 1.12 | 0.80 |
| X019923 | BCG_1407  | 64   | 5  | 2  | 2  | 1.00 | 0.99 | 0.58 | 0.73 | 1.09 | 1.01 | 0.90 |
| X019923 | BCG_1412  | 229  | 8  | 4  | 4  | 1.00 | 0.94 | 1.16 | 1.16 | 1.27 | 1.07 | 0.85 |
| X019923 | BCG_1422  | 163  | 4  | 4  | 4  | 1.00 | 0.82 | 1.24 | 1.00 | 1.08 | 1.22 | 0.98 |
| X019923 | BCG_1425C | 549  | 19 | 11 | 15 | 1.00 | 0.91 | 0.90 | 1.01 | 1.07 | 1.10 | 0.88 |
| X019923 | BCG_1426C | 209  | 10 | 5  | 5  | 1.00 | 0.92 | 1.03 | 0.88 | 1.05 | 1.09 | 0.84 |
| X019923 | BCG_1429C | 562  | 21 | 12 | 17 | 1.00 | 0.86 | 0.79 | 0.97 | 0.92 | 1.16 | 1.18 |
| X019923 | BCG_1430  | 231  | 4  | 3  | 3  | 1.00 | 0.85 | 0.82 | 0.98 | 1.04 | 1.18 | 0.83 |
| X019923 | BCG_1438C | 187  | 8  | 4  | 4  | 1.00 | 0.56 | 0.56 | 0.71 | 0.76 | 1.78 | 0.43 |
| X019923 | BCG_1440  | 331  | 12 | 7  | 10 | 1.00 | 0.81 | 0.99 | 1.06 | 1.18 | 1.23 | 0.71 |
| X019923 | BCG_1441  | 411  | 16 | 9  | 11 | 1.00 | 0.92 | 0.93 | 1.04 | 0.96 | 1.09 | 0.91 |
| X019923 | BCG_1442  | 241  | 9  | 4  | 5  | 1.00 | 1.09 | 1.00 | 1.04 | 1.17 | 0.92 | 1.07 |
| X019923 | BCG_1443  | 101  | 4  | 3  | 3  | 1.00 | 0.86 | 0.93 | 1.28 | 1.12 | 1.17 | 1.04 |
| X019923 | BCG_1444  | 511  | 11 | 8  | 10 | 1.00 | 0.95 | 0.84 | 0.93 | 0.97 | 1.06 | 0.92 |
| X019923 | BCG_1445  | 1051 | 39 | 23 | 25 | 1.00 | 0.85 | 0.77 | 0.82 | 0.78 | 1.18 | 0.99 |
| X019923 | BCG_1446  | 120  | 3  | 2  | 2  | 1.00 | 0.82 | 0.92 | 1.13 | 1.25 | 1.22 | 0.70 |

|         |           |      |    |    |    |      |      |      |      |      |      |      |
|---------|-----------|------|----|----|----|------|------|------|------|------|------|------|
| X019923 | BCG_1449  | 636  | 65 | 11 | 51 | 1.00 | 0.95 | 1.02 | 1.09 | 1.24 | 1.05 | 0.51 |
| X019923 | BCG_1451  | 128  | 4  | 2  | 4  | 1.00 | 0.86 | 0.71 | 0.86 | 0.86 | 1.16 | 0.65 |
| X019923 | BCG_1452  | 604  | 17 | 10 | 11 | 1.00 | 0.92 | 0.86 | 0.87 | 0.84 | 1.09 | 0.96 |
| X019923 | BCG_1453  | 897  | 43 | 17 | 28 | 1.00 | 0.88 | 0.92 | 0.99 | 1.04 | 1.14 | 0.83 |
| X019923 | BCG_1458C | 149  | 4  | 3  | 3  | 1.00 | 0.83 | 0.83 | 1.02 | 0.98 | 1.20 | 0.81 |
| X019923 | BCG_1461C | 402  | 11 | 8  | 8  | 1.00 | 0.88 | 0.97 | 1.15 | 1.28 | 1.14 | 0.80 |
| X019923 | BCG_1463  | 377  | 20 | 8  | 9  | 1.00 | 0.91 | 0.99 | 1.00 | 0.85 | 1.10 | 0.88 |
| X019923 | BCG_1465  | 362  | 13 | 6  | 7  | 1.00 | 0.88 | 0.93 | 1.09 | 1.27 | 1.14 | 0.71 |
| X019923 | BCG_1467  | 150  | 5  | 3  | 3  | 1.00 | 0.92 | 0.87 | 0.94 | 1.55 | 1.09 | 0.70 |
| X019923 | BCG_1468  | 223  | 8  | 7  | 7  | 1.00 | 0.84 | 0.82 | 0.97 | 1.09 | 1.19 | 0.79 |
| X019923 | BCG_1470  | 993  | 25 | 16 | 18 | 1.00 | 0.93 | 0.90 | 0.99 | 1.16 | 1.08 | 0.92 |
| X019923 | BCG_1471C | 251  | 8  | 5  | 6  | 1.00 | 0.91 | 0.80 | 0.94 | 1.01 | 1.10 | 0.99 |
| X019923 | BCG_1472C | 475  | 16 | 9  | 15 | 1.00 | 0.88 | 0.88 | 0.97 | 1.18 | 1.14 | 0.83 |
| X019923 | BCG_1473  | 499  | 11 | 8  | 10 | 1.00 | 0.85 | 0.83 | 1.10 | 1.20 | 1.17 | 0.72 |
| X019923 | BCG_1476  | 321  | 15 | 7  | 7  | 1.00 | 0.85 | 0.96 | 1.19 | 1.24 | 1.18 | 0.81 |
| X019923 | BCG_1477  | 213  | 6  | 4  | 4  | 1.00 | 0.79 | 1.03 | 1.19 | 1.24 | 1.26 | 0.82 |
| X019923 | BCG_1478  | 150  | 4  | 3  | 4  | 1.00 | 0.79 | 1.08 | 1.34 | 1.41 | 1.27 | 1.19 |
| X019923 | BCG_1481  | 186  | 14 | 5  | 5  | 1.00 | 0.94 | 1.01 | 1.07 | 1.22 | 1.06 | 0.78 |
| X019923 | BCG_1482  | 464  | 19 | 8  | 9  | 1.00 | 0.95 | 0.93 | 0.97 | 1.14 | 1.06 | 0.92 |
| X019923 | BCG_1483  | 317  | 8  | 6  | 7  | 1.00 | 0.81 | 0.93 | 1.05 | 1.13 | 1.24 | 0.83 |
| X019923 | BCG_1484  | 628  | 16 | 12 | 12 | 1.00 | 0.93 | 0.85 | 0.94 | 1.21 | 1.07 | 0.77 |
| X019923 | BCG_1485C | 83   | 3  | 2  | 2  | 1.00 | 0.83 | 0.75 | 0.98 | 1.08 | 1.20 | 0.86 |
| X019923 | BCG_1486  | 83   | 4  | 2  | 2  | 1.00 | 0.88 | 1.16 | 1.10 | 1.13 | 1.14 | 0.94 |
| X019923 | BCG_1488C | 427  | 15 | 7  | 9  | 1.00 | 0.83 | 0.93 | 1.10 | 1.18 | 1.21 | 0.70 |
| X019923 | BCG_1490  | 215  | 9  | 7  | 7  | 1.00 | 0.87 | 0.80 | 0.89 | 0.97 | 1.15 | 0.88 |
| X019923 | BCG_1497  | 936  | 34 | 15 | 28 | 1.00 | 0.91 | 0.95 | 1.11 | 1.30 | 1.10 | 0.78 |
| X019923 | BCG_1498  | 730  | 18 | 10 | 12 | 1.00 | 0.85 | 1.00 | 1.13 | 1.32 | 1.17 | 0.68 |
| X019923 | BCG_1499  | 690  | 18 | 12 | 16 | 1.00 | 0.91 | 0.93 | 1.12 | 1.26 | 1.10 | 0.71 |
| X019923 | BCG_1503  | 98   | 8  | 3  | 3  | 1.00 | 0.82 | 0.93 | 1.06 | 1.13 | 1.22 | 0.65 |
| X019923 | BCG_1504C | 292  | 14 | 7  | 9  | 1.00 | 0.80 | 0.77 | 0.96 | 0.91 | 1.24 | 0.83 |
| X019923 | BCG_1506C | 515  | 12 | 8  | 9  | 1.00 | 0.90 | 0.92 | 1.11 | 1.26 | 1.11 | 0.70 |
| X019923 | BCG_1507C | 662  | 25 | 12 | 16 | 1.00 | 0.88 | 0.89 | 0.99 | 1.11 | 1.14 | 0.85 |
| X019923 | BCG_1508C | 529  | 19 | 11 | 11 | 1.00 | 0.95 | 1.04 | 1.23 | 1.32 | 1.06 | 0.86 |
| X019923 | BCG_1509C | 1060 | 38 | 22 | 34 | 1.00 | 0.89 | 0.93 | 1.10 | 1.27 | 1.12 | 0.69 |
| X019923 | BCG_1510C | 1367 | 58 | 22 | 39 | 1.00 | 0.91 | 0.94 | 1.06 | 1.16 | 1.10 | 0.75 |
| X019923 | BCG_1515C | 661  | 22 | 12 | 17 | 1.00 | 1.01 | 1.02 | 1.22 | 1.39 | 0.99 | 0.86 |
| X019923 | BCG_1516  | 175  | 7  | 4  | 4  | 1.00 | 1.17 | 1.21 | 1.16 | 1.29 | 0.86 | 1.23 |
| X019923 | BCG_1517C | 107  | 4  | 2  | 3  | 1.00 | 1.13 | 1.02 | 1.11 | 1.04 | 0.89 | 0.95 |
| X019923 | BCG_1519C | 165  | 8  | 5  | 5  | 1.00 | 1.05 | 0.92 | 1.18 | 1.11 | 0.95 | 0.90 |

|         |           |      |    |    |    |      |      |      |      |      |      |      |
|---------|-----------|------|----|----|----|------|------|------|------|------|------|------|
| X019923 | BCG_1520C | 129  | 7  | 3  | 3  | 1.00 | 0.83 | 0.57 | 1.09 | 1.49 | 1.21 | 0.47 |
| X019923 | BCG_1522  | 1023 | 37 | 21 | 29 | 1.00 | 0.90 | 0.81 | 0.92 | 0.94 | 1.12 | 1.25 |
| X019923 | BCG_1523  | 621  | 20 | 12 | 14 | 1.00 | 0.85 | 0.88 | 1.00 | 1.14 | 1.17 | 0.84 |
| X019923 | BCG_1524  | 759  | 35 | 13 | 24 | 1.00 | 0.77 | 0.84 | 0.93 | 0.97 | 1.30 | 0.79 |
| X019923 | BCG_1525  | 1095 | 34 | 17 | 27 | 1.00 | 0.89 | 0.96 | 1.20 | 1.23 | 1.13 | 0.82 |
| X019923 | BCG_1526  | 278  | 5  | 4  | 5  | 1.00 | 0.91 | 0.94 | 1.12 | 1.20 | 1.09 | 0.63 |
| X019923 | BCG_1527  | 147  | 4  | 3  | 3  | 1.00 | 0.97 | 0.84 | 1.02 | 1.06 | 1.03 | 0.71 |
| X019923 | BCG_1528C | 152  | 8  | 3  | 3  | 1.00 | 1.08 | 1.04 | 1.05 | 1.46 | 0.92 | 0.93 |
| X019923 | BCG_1532  | 155  | 6  | 3  | 4  | 1.00 | 0.70 | 0.93 | 0.72 | 0.74 | 1.42 | 0.48 |
| X019923 | BCG_1533  | 284  | 9  | 6  | 8  | 1.00 | 0.80 | 0.90 | 1.84 | 0.96 | 1.25 | 0.75 |
| X019923 | BCG_1534  | 110  | 6  | 3  | 3  | 1.00 | 0.73 | 1.04 | 1.11 | 1.29 | 1.37 | 0.78 |
| X019923 | BCG_1535  | 90   | 3  | 2  | 2  | 1.00 | 0.77 | 0.83 | 0.76 | 0.79 | 1.30 | 0.62 |
| X019923 | BCG_1537C | 1624 | 69 | 29 | 50 | 1.00 | 0.83 | 0.86 | 0.89 | 1.04 | 1.20 | 0.85 |
| X019923 | BCG_1538  | 170  | 6  | 3  | 4  | 1.00 | 0.85 | 0.90 | 1.07 | 1.03 | 1.18 | 1.07 |
| X019923 | BCG_1541  | 1297 | 60 | 20 | 40 | 1.00 | 0.87 | 0.87 | 0.97 | 1.03 | 1.15 | 0.80 |
| X019923 | BCG_1542  | 625  | 26 | 12 | 17 | 1.00 | 0.89 | 0.89 | 1.01 | 1.09 | 1.13 | 0.79 |
| X019923 | BCG_1543  | 520  | 21 | 10 | 14 | 1.00 | 0.94 | 0.90 | 1.06 | 1.12 | 1.07 | 1.03 |
| X019923 | BCG_1545  | 621  | 24 | 10 | 16 | 1.00 | 0.92 | 0.96 | 1.08 | 1.27 | 1.09 | 0.79 |
| X019923 | BCG_1546  | 802  | 68 | 12 | 48 | 1.00 | 0.84 | 0.85 | 0.70 | 0.82 | 1.19 | 0.64 |
| X019923 | BCG_1547  | 102  | 5  | 3  | 3  | 1.00 | 0.65 | 0.89 | 0.94 | 0.87 | 1.55 | 0.71 |
| X019923 | BCG_1548C | 130  | 6  | 3  | 3  | 1.00 | 0.70 | 0.66 | 0.94 | 0.70 | 1.43 | 0.58 |
| X019923 | BCG_1549  | 84   | 2  | 2  | 2  | 1.00 | 0.96 | 1.02 | 0.97 | 0.90 | 1.04 | 0.77 |
| X019923 | BCG_1550  | 1263 | 69 | 19 | 44 | 1.00 | 0.82 | 0.76 | 0.86 | 0.75 | 1.23 | 1.05 |
| X019923 | BCG_1551  | 146  | 8  | 4  | 6  | 1.00 | 0.85 | 0.83 | 1.01 | 0.97 | 1.18 | 0.71 |
| X019923 | BCG_1555  | 1008 | 22 | 17 | 18 | 1.00 | 0.86 | 0.91 | 1.02 | 1.18 | 1.17 | 0.85 |
| X019923 | BCG_1556  | 666  | 19 | 10 | 11 | 1.00 | 0.96 | 0.99 | 1.14 | 1.17 | 1.04 | 0.90 |
| X019923 | BCG_1559  | 289  | 14 | 5  | 5  | 1.00 | 0.85 | 0.89 | 1.13 | 1.21 | 1.17 | 0.93 |
| X019923 | BCG_1560  | 300  | 14 | 6  | 7  | 1.00 | 0.84 | 0.90 | 1.04 | 0.96 | 1.18 | 0.75 |
| X019923 | BCG_1561C | 100  | 3  | 2  | 2  | 1.00 | 1.09 | 1.06 | 1.19 | 1.39 | 0.91 | 0.75 |
| X019923 | BCG_1564  | 124  | 7  | 3  | 3  | 1.00 | 1.02 | 1.05 | 1.37 | 1.24 | 0.98 | 1.07 |
| X019923 | BCG_1565  | 140  | 4  | 3  | 3  | 1.00 | 0.83 | 0.96 | 1.07 | 1.11 | 1.20 | 0.81 |
| X019923 | BCG_1573  | 221  | 11 | 5  | 5  | 1.00 | 0.92 | 1.00 | 1.21 | 1.23 | 1.09 | 0.81 |
| X019923 | BCG_1575  | 130  | 8  | 4  | 4  | 1.00 | 0.94 | 0.88 | 1.02 | 1.24 | 1.06 | 0.75 |
| X019923 | BCG_1576  | 76   | 7  | 2  | 2  | 1.00 | 1.18 | 1.07 | 1.18 | 1.24 | 0.85 | 1.08 |
| X019923 | BCG_1577  | 87   | 3  | 2  | 2  | 1.00 | 0.80 | 0.92 | 1.20 | 1.02 | 1.25 | 0.75 |
| X019923 | BCG_1578C | 53   | 3  | 2  | 2  | 1.00 | 0.87 | 0.71 | 0.89 | 0.91 | 1.14 | 0.86 |
| X019923 | BCG_1579C | 2170 | 65 | 37 | 39 | 1.00 | 0.79 | 0.71 | 0.72 | 0.66 | 1.27 | 1.00 |
| X019923 | BCG_1583  | 230  | 5  | 4  | 5  | 1.00 | 1.06 | 0.97 | 1.26 | 1.42 | 0.94 | 0.89 |
| X019923 | BCG_1585  | 292  | 6  | 5  | 5  | 1.00 | 0.97 | 0.84 | 0.98 | 1.24 | 1.03 | 0.70 |

|         |           |      |    |    |    |      |      |      |      |      |      |      |
|---------|-----------|------|----|----|----|------|------|------|------|------|------|------|
| X019923 | BCG_1586  | 68   | 3  | 2  | 2  | 1.00 | 0.94 | 0.93 | 1.12 | 0.88 | 1.06 | 0.66 |
| X019923 | BCG_1588  | 516  | 25 | 11 | 12 | 1.00 | 0.84 | 0.92 | 1.04 | 1.00 | 1.19 | 0.95 |
| X019923 | BCG_1590C | 493  | 15 | 8  | 8  | 1.00 | 0.80 | 0.85 | 0.99 | 1.16 | 1.25 | 0.69 |
| X019923 | BCG_1592  | 294  | 12 | 6  | 7  | 1.00 | 0.92 | 0.83 | 0.85 | 0.93 | 1.08 | 0.78 |
| X019923 | BCG_1595  | 1108 | 40 | 18 | 29 | 1.00 | 0.82 | 0.78 | 0.90 | 0.94 | 1.22 | 0.95 |
| X019923 | BCG_1599  | 328  | 10 | 4  | 5  | 1.00 | 0.85 | 0.89 | 1.00 | 1.10 | 1.18 | 0.75 |
| X019923 | BCG_1600  | 776  | 32 | 18 | 18 | 1.00 | 0.83 | 0.87 | 0.88 | 0.90 | 1.20 | 1.01 |
| X019923 | BCG_1602  | 153  | 7  | 3  | 3  | 1.00 | 0.97 | 1.21 | 1.30 | 1.49 | 1.03 | 0.89 |
| X019923 | BCG_1603  | 247  | 13 | 5  | 5  | 1.00 | 0.93 | 1.09 | 1.21 | 1.13 | 1.07 | 0.96 |
| X019923 | BCG_1607  | 128  | 5  | 4  | 4  | 1.00 | 0.90 | 0.94 | 1.11 | 1.27 | 1.11 | 0.73 |
| X019923 | BCG_1610  | 441  | 14 | 8  | 12 | 1.00 | 0.89 | 0.90 | 1.07 | 1.14 | 1.12 | 0.65 |
| X019923 | BCG_1611  | 273  | 7  | 7  | 7  | 1.00 | 0.91 | 0.87 | 0.96 | 1.18 | 1.10 | 0.77 |
| X019923 | BCG_1613  | 100  | 4  | 3  | 3  | 1.00 | 0.96 | 0.98 | 1.21 | 1.27 | 1.05 | 0.83 |
| X019923 | BCG_1617C | 113  | 6  | 2  | 2  | 1.00 | 0.92 | 1.02 | 1.05 | 1.13 | 1.09 | 0.77 |
| X019923 | BCG_1618C | 202  | 8  | 3  | 3  | 1.00 | 0.92 | 0.85 | 0.68 | 0.83 | 1.09 | 0.90 |
| X019923 | BCG_1621  | 96   | 3  | 2  | 2  | 1.00 | 1.10 | 1.15 | 1.20 | 1.42 | 0.91 | 0.95 |
| X019923 | BCG_1622  | 171  | 22 | 5  | 5  | 1.00 | 1.06 | 1.23 | 1.12 | 1.13 | 0.94 | 0.71 |
| X019923 | BCG_1623  | 150  | 5  | 2  | 2  | 1.00 | 0.86 | 1.08 | 0.92 | 1.16 | 1.16 | 0.80 |
| X019923 | BCG_1624  | 131  | 7  | 4  | 4  | 1.00 | 1.07 | 1.04 | 1.21 | 0.87 | 0.93 | 0.86 |
| X019923 | BCG_1627  | 93   | 4  | 2  | 2  | 1.00 | 0.88 | 1.04 | 1.18 | 1.16 | 1.14 | 0.69 |
| X019923 | BCG_1629  | 209  | 3  | 3  | 3  | 1.00 | 1.03 | 0.92 | 1.18 | 1.37 | 0.97 | 0.98 |
| X019923 | BCG_1631C | 232  | 6  | 5  | 5  | 1.00 | 1.08 | 1.18 | 1.22 | 1.32 | 0.92 | 0.78 |
| X019923 | BCG_1632  | 283  | 12 | 5  | 8  | 1.00 | 0.97 | 1.00 | 2.07 | 1.26 | 1.03 | 0.86 |
| X019923 | BCG_1633  | 215  | 9  | 6  | 6  | 1.00 | 0.82 | 0.86 | 0.94 | 1.02 | 1.22 | 0.78 |
| X019923 | BCG_1634  | 346  | 12 | 8  | 9  | 1.00 | 0.93 | 0.99 | 1.40 | 1.25 | 1.07 | 0.75 |
| X019923 | BCG_1635  | 222  | 9  | 6  | 6  | 1.00 | 0.80 | 0.94 | 0.91 | 0.96 | 1.25 | 0.71 |
| X019923 | BCG_1636C | 398  | 18 | 7  | 13 | 1.00 | 0.88 | 0.88 | 1.04 | 1.08 | 1.14 | 0.75 |
| X019923 | BCG_1637  | 318  | 8  | 7  | 7  | 1.00 | 0.91 | 0.87 | 1.03 | 1.07 | 1.10 | 0.77 |
| X019923 | BCG_1638  | 257  | 8  | 6  | 6  | 1.00 | 0.93 | 0.89 | 1.07 | 1.16 | 1.07 | 0.71 |
| X019923 | BCG_1639  | 187  | 8  | 4  | 5  | 1.00 | 0.85 | 0.76 | 0.79 | 0.81 | 1.17 | 0.76 |
| X019923 | BCG_1640  | 187  | 9  | 4  | 5  | 1.00 | 0.57 | 0.55 | 0.58 | 0.80 | 1.75 | 0.58 |
| X019923 | BCG_1641  | 750  | 17 | 12 | 13 | 1.00 | 0.93 | 0.94 | 1.10 | 1.27 | 1.07 | 0.72 |
| X019923 | BCG_1643  | 429  | 17 | 8  | 9  | 1.00 | 0.76 | 0.83 | 1.06 | 1.00 | 1.31 | 0.70 |
| X019923 | BCG_1644  | 110  | 4  | 2  | 3  | 1.00 | 0.91 | 0.87 | 1.02 | 1.01 | 1.10 | 0.63 |
| X019923 | BCG_1645  | 112  | 3  | 2  | 3  | 1.00 | 0.97 | 0.94 | 1.07 | 1.03 | 1.04 | 1.17 |
| X019923 | BCG_1646C | 235  | 12 | 7  | 9  | 1.00 | 0.86 | 0.90 | 1.04 | 1.09 | 1.17 | 0.66 |
| X019923 | BCG_1647  | 438  | 18 | 10 | 14 | 1.00 | 0.93 | 1.01 | 1.09 | 1.26 | 1.08 | 0.93 |
| X019923 | BCG_1649  | 834  | 26 | 14 | 21 | 1.00 | 0.90 | 0.90 | 1.07 | 1.16 | 1.11 | 0.72 |
| X019923 | BCG_1650  | 591  | 19 | 12 | 14 | 1.00 | 1.00 | 0.99 | 1.51 | 1.43 | 1.00 | 1.07 |

|         |           |      |     |    |     |      |      |      |      |      |      |      |
|---------|-----------|------|-----|----|-----|------|------|------|------|------|------|------|
| X019923 | BCG_1651  | 614  | 12  | 10 | 10  | 1.00 | 0.92 | 0.97 | 1.06 | 1.25 | 1.09 | 0.79 |
| X019923 | BCG_1652  | 578  | 18  | 12 | 14  | 1.00 | 0.87 | 0.78 | 0.87 | 0.81 | 1.15 | 0.88 |
| X019923 | BCG_1653  | 91   | 6   | 3  | 4   | 1.00 | 1.00 | 0.94 | 1.28 | 1.11 | 1.00 | 3.65 |
| X019923 | BCG_1655  | 958  | 49  | 18 | 28  | 1.00 | 0.92 | 0.96 | 1.42 | 1.16 | 1.08 | 0.90 |
| X019923 | BCG_1661C | 194  | 5   | 4  | 5   | 1.00 | 0.82 | 0.71 | 0.86 | 0.79 | 1.23 | 0.87 |
| X019923 | BCG_1662C | 78   | 3   | 3  | 3   | 1.00 | 0.96 | 0.78 | 1.08 | 1.08 | 1.04 | 1.24 |
| X019923 | BCG_1664  | 754  | 21  | 10 | 16  | 1.00 | 0.88 | 0.90 | 1.14 | 1.28 | 1.14 | 0.74 |
| X019923 | BCG_1665C | 102  | 10  | 2  | 4   | 1.00 | 0.80 | 0.82 | 0.88 | 0.82 | 1.25 | 0.69 |
| X019923 | BCG_1667  | 1507 | 40  | 28 | 30  | 1.00 | 0.95 | 0.84 | 0.86 | 0.98 | 1.05 | 1.04 |
| X019923 | BCG_1668  | 2493 | 195 | 43 | 139 | 1.00 | 0.88 | 0.82 | 0.87 | 0.75 | 1.14 | 0.75 |
| X019923 | BCG_1669  | 347  | 12  | 8  | 9   | 1.00 | 0.88 | 0.92 | 1.19 | 1.30 | 1.14 | 0.75 |
| X019923 | BCG_1670C | 105  | 2   | 2  | 2   | 1.00 | 0.98 | 0.82 | 0.82 | 1.16 | 1.02 | 0.80 |
| X019923 | BCG_1671  | 254  | 14  | 5  | 5   | 1.00 | 0.97 | 1.08 | 1.14 | 1.07 | 1.04 | 0.98 |
| X019923 | BCG_1674  | 638  | 31  | 11 | 24  | 1.00 | 0.90 | 0.96 | 1.41 | 1.25 | 1.11 | 0.72 |
| X019923 | BCG_1675C | 307  | 22  | 5  | 14  | 1.00 | 0.96 | 0.85 | 0.86 | 0.86 | 1.04 | 2.65 |
| X019923 | BCG_1676  | 1370 | 45  | 28 | 33  | 1.00 | 0.77 | 0.70 | 0.67 | 0.63 | 1.30 | 0.80 |
| X019923 | BCG_1677C | 57   | 3   | 2  | 2   | 1.00 | 1.36 | 0.89 | 1.52 | 1.05 | 0.74 | 0.96 |
| X019923 | BCG_1679C | 348  | 18  | 8  | 8   | 1.00 | 0.79 | 0.81 | 0.82 | 0.77 | 1.26 | 1.17 |
| X019923 | BCG_1680  | 503  | 25  | 12 | 18  | 1.00 | 1.02 | 0.80 | 0.81 | 0.92 | 0.98 | 0.58 |
| X019923 | BCG_1681  | 223  | 17  | 4  | 13  | 1.00 | 0.81 | 0.78 | 0.77 | 0.75 | 1.23 | 0.67 |
| X019923 | BCG_1682  | 704  | 49  | 13 | 28  | 1.00 | 0.88 | 0.80 | 0.92 | 0.79 | 1.14 | 0.75 |
| X019923 | BCG_1683  | 331  | 11  | 7  | 7   | 1.00 | 0.80 | 0.80 | 0.88 | 0.80 | 1.25 | 0.74 |
| X019923 | BCG_1686  | 168  | 8   | 3  | 3   | 1.00 | 0.72 | 0.83 | 0.88 | 0.98 | 1.38 | 0.71 |
| X019923 | BCG_1688  | 395  | 13  | 8  | 8   | 1.00 | 0.81 | 0.92 | 1.06 | 1.00 | 1.23 | 0.88 |
| X019923 | BCG_1689  | 772  | 24  | 15 | 17  | 1.00 | 0.85 | 0.83 | 0.74 | 0.78 | 1.17 | 0.88 |
| X019923 | BCG_1691  | 395  | 14  | 7  | 11  | 1.00 | 0.89 | 0.91 | 1.10 | 1.19 | 1.12 | 0.80 |
| X019923 | BCG_1692  | 533  | 11  | 7  | 9   | 1.00 | 0.92 | 0.96 | 1.15 | 1.23 | 1.08 | 0.72 |
| X019923 | BCG_1693  | 538  | 19  | 9  | 14  | 1.00 | 0.90 | 0.96 | 1.01 | 1.13 | 1.11 | 0.77 |
| X019923 | BCG_1694  | 352  | 13  | 7  | 11  | 1.00 | 0.92 | 1.03 | 1.13 | 1.33 | 1.08 | 0.80 |
| X019923 | BCG_1695  | 100  | 5   | 2  | 4   | 1.00 | 0.81 | 1.03 | 1.16 | 1.44 | 1.23 | 0.70 |
| X019923 | BCG_1696  | 270  | 6   | 5  | 5   | 1.00 | 0.90 | 0.99 | 1.01 | 1.30 | 1.11 | 0.75 |
| X019923 | BCG_1697  | 727  | 19  | 13 | 18  | 1.00 | 0.92 | 0.97 | 1.05 | 1.24 | 1.09 | 0.93 |
| X019923 | BCG_1698  | 386  | 13  | 9  | 9   | 1.00 | 0.95 | 0.89 | 1.07 | 1.13 | 1.06 | 0.87 |
| X019923 | BCG_1699  | 137  | 17  | 2  | 2   | 1.00 | 0.69 | 0.92 | 1.03 | 0.91 | 1.44 | 0.83 |
| X019923 | BCG_1705C | 147  | 8   | 4  | 4   | 1.00 | 0.77 | 0.77 | 0.87 | 0.74 | 1.30 | 0.78 |
| X019923 | BCG_1706C | 318  | 14  | 6  | 6   | 1.00 | 0.96 | 0.87 | 0.93 | 0.93 | 1.04 | 1.09 |
| X019923 | BCG_1714  | 347  | 9   | 7  | 7   | 1.00 | 0.83 | 0.87 | 0.93 | 1.06 | 1.20 | 0.69 |
| X019923 | BCG_1716  | 287  | 10  | 5  | 7   | 1.00 | 0.90 | 0.83 | 0.98 | 1.02 | 1.11 | 1.09 |
| X019923 | BCG_1717  | 608  | 19  | 12 | 15  | 1.00 | 0.93 | 0.88 | 1.02 | 1.08 | 1.07 | 0.88 |

|         |           |      |    |    |    |      |      |      |      |      |      |      |
|---------|-----------|------|----|----|----|------|------|------|------|------|------|------|
| X019923 | BCG_1718  | 271  | 10 | 6  | 6  | 1.00 | 0.96 | 0.92 | 1.06 | 1.27 | 1.04 | 0.81 |
| X019923 | BCG_1719  | 106  | 7  | 2  | 2  | 1.00 | 0.78 | 0.89 | 0.86 | 0.89 | 1.28 | 0.87 |
| X019923 | BCG_1721  | 1458 | 44 | 26 | 31 | 1.00 | 0.94 | 0.94 | 0.93 | 1.01 | 1.06 | 0.94 |
| X019923 | BCG_1722  | 124  | 4  | 2  | 2  | 1.00 | 0.88 | 1.28 | 0.95 | 0.75 | 1.14 | 0.55 |
| X019923 | BCG_1727  | 368  | 12 | 5  | 6  | 1.00 | 1.01 | 1.00 | 1.25 | 1.39 | 0.99 | 0.84 |
| X019923 | BCG_1729  | 560  | 18 | 13 | 14 | 1.00 | 0.88 | 0.82 | 0.92 | 0.80 | 1.14 | 0.75 |
| X019923 | BCG_1733  | 293  | 6  | 5  | 5  | 1.00 | 0.97 | 1.20 | 2.27 | 1.20 | 1.03 | 0.93 |
| X019923 | BCG_1734  | 430  | 13 | 10 | 10 | 1.00 | 0.92 | 0.90 | 1.03 | 0.88 | 1.09 | 0.83 |
| X019923 | BCG_1735  | 283  | 8  | 6  | 6  | 1.00 | 1.08 | 0.85 | 1.06 | 0.99 | 0.92 | 0.97 |
| X019923 | BCG_1736  | 245  | 6  | 5  | 5  | 1.00 | 0.84 | 0.83 | 0.90 | 0.95 | 1.19 | 0.90 |
| X019923 | BCG_1737  | 399  | 13 | 9  | 9  | 1.00 | 1.02 | 0.99 | 1.19 | 1.31 | 0.98 | 0.94 |
| X019923 | BCG_1739  | 417  | 13 | 8  | 8  | 1.00 | 0.94 | 0.81 | 1.00 | 0.93 | 1.06 | 1.00 |
| X019923 | BCG_1741C | 478  | 16 | 9  | 12 | 1.00 | 0.95 | 1.07 | 1.16 | 1.33 | 1.05 | 0.80 |
| X019923 | BCG_1746  | 213  | 6  | 6  | 6  | 1.00 | 0.92 | 0.90 | 1.01 | 0.96 | 1.09 | 0.92 |
| X019923 | BCG_1747  | 588  | 24 | 11 | 12 | 1.00 | 0.91 | 0.91 | 1.03 | 0.96 | 1.10 | 1.00 |
| X019923 | BCG_1748  | 115  | 2  | 2  | 2  | 1.00 | 0.96 | 1.01 | 0.94 | 1.27 | 1.05 | 0.79 |
| X019923 | BCG_1749  | 214  | 9  | 4  | 6  | 1.00 | 0.97 | 0.99 | 1.06 | 0.97 | 1.03 | 0.90 |
| X019923 | BCG_1750  | 529  | 13 | 8  | 11 | 1.00 | 0.84 | 0.80 | 0.87 | 0.82 | 1.20 | 0.74 |
| X019923 | BCG_1751  | 399  | 9  | 8  | 8  | 1.00 | 0.83 | 0.94 | 0.98 | 1.12 | 1.21 | 0.63 |
| X019923 | BCG_1752  | 378  | 15 | 8  | 8  | 1.00 | 0.90 | 0.95 | 1.10 | 1.29 | 1.11 | 0.77 |
| X019923 | BCG_1758  | 178  | 7  | 6  | 6  | 1.00 | 0.89 | 0.90 | 1.16 | 1.08 | 1.12 | 0.69 |
| X019923 | BCG_1761  | 108  | 7  | 3  | 3  | 1.00 | 0.87 | 0.87 | 1.00 | 1.20 | 1.15 | 0.77 |
| X019923 | BCG_1768C | 70   | 2  | 2  | 2  | 1.00 | 0.58 | 1.08 | 1.15 | 1.14 | 1.74 | 0.62 |
| X019923 | BCG_1770  | 1017 | 42 | 21 | 31 | 1.00 | 0.87 | 0.89 | 0.94 | 1.08 | 1.14 | 0.84 |
| X019923 | BCG_1771C | 198  | 4  | 3  | 3  | 1.00 | 0.93 | 0.93 | 1.14 | 1.19 | 1.07 | 0.62 |
| X019923 | BCG_1777  | 245  | 8  | 6  | 7  | 1.00 | 0.89 | 0.91 | 1.06 | 1.16 | 1.12 | 0.68 |
| X019923 | BCG_1782  | 106  | 3  | 2  | 2  | 1.00 | 0.81 | 0.79 | 0.87 | 0.98 | 1.23 | 0.96 |
| X019923 | BCG_1785  | 219  | 11 | 4  | 5  | 1.00 | 0.90 | 0.91 | 0.92 | 0.98 | 1.11 | 0.87 |
| X019923 | BCG_1786  | 877  | 34 | 19 | 21 | 1.00 | 0.81 | 0.78 | 0.89 | 0.80 | 1.23 | 0.91 |
| X019923 | BCG_1787  | 141  | 11 | 3  | 3  | 1.00 | 0.88 | 0.89 | 0.89 | 0.92 | 1.14 | 0.74 |
| X019923 | BCG_1790  | 302  | 11 | 6  | 6  | 1.00 | 0.90 | 0.82 | 1.00 | 0.86 | 1.11 | 0.90 |
| X019923 | BCG_1797  | 780  | 17 | 13 | 13 | 1.00 | 0.91 | 0.94 | 0.87 | 0.93 | 1.10 | 0.98 |
| X019923 | BCG_1802C | 119  | 4  | 3  | 3  | 1.00 | 0.82 | 0.96 | 1.09 | 1.21 | 1.23 | 0.54 |
| X019923 | BCG_1803C | 456  | 28 | 10 | 16 | 1.00 | 0.86 | 0.78 | 0.89 | 0.86 | 1.17 | 1.07 |
| X019923 | BCG_1804C | 161  | 6  | 3  | 3  | 1.00 | 0.95 | 0.86 | 1.00 | 1.07 | 1.05 | 0.99 |
| X019923 | BCG_1807  | 572  | 24 | 12 | 20 | 1.00 | 0.90 | 1.00 | 1.15 | 1.33 | 1.11 | 0.72 |
| X019923 | BCG_1808  | 343  | 12 | 8  | 10 | 1.00 | 0.93 | 0.92 | 1.04 | 1.06 | 1.07 | 0.99 |
| X019923 | BCG_1811C | 341  | 8  | 5  | 7  | 1.00 | 0.89 | 0.85 | 0.95 | 1.01 | 1.12 | 0.91 |
| X019923 | BCG_1812C | 1857 | 98 | 31 | 72 | 1.00 | 0.82 | 0.89 | 0.95 | 0.83 | 1.22 | 1.48 |

|         |           |      |    |    |    |      |      |      |      |      |      |      |
|---------|-----------|------|----|----|----|------|------|------|------|------|------|------|
| X019923 | BCG_1813  | 517  | 16 | 8  | 14 | 1.00 | 0.92 | 0.90 | 0.98 | 0.97 | 1.09 | 0.74 |
| X019923 | BCG_1815  | 667  | 21 | 14 | 16 | 1.00 | 0.90 | 0.87 | 1.06 | 1.00 | 1.11 | 0.92 |
| X019923 | BCG_1816  | 1398 | 55 | 28 | 33 | 1.00 | 0.80 | 0.73 | 0.74 | 0.69 | 1.25 | 0.97 |
| X019923 | BCG_1824  | 188  | 6  | 3  | 5  | 1.00 | 0.78 | 1.39 | 1.03 | 0.99 | 1.28 | 0.63 |
| X019923 | BCG_1826  | 657  | 18 | 8  | 9  | 1.00 | 0.90 | 0.97 | 1.13 | 1.27 | 1.12 | 0.76 |
| X019923 | BCG_1827  | 533  | 16 | 9  | 13 | 1.00 | 0.86 | 0.82 | 0.95 | 0.85 | 1.16 | 1.00 |
| X019923 | BCG_1828  | 143  | 6  | 3  | 3  | 1.00 | 0.77 | 0.93 | 0.92 | 1.18 | 1.30 | 0.88 |
| X019923 | BCG_1829  | 502  | 10 | 8  | 9  | 1.00 | 0.79 | 0.76 | 0.88 | 0.88 | 1.26 | 0.89 |
| X019923 | BCG_1830  | 351  | 16 | 9  | 9  | 1.00 | 0.94 | 1.02 | 1.16 | 1.21 | 1.06 | 0.93 |
| X019923 | BCG_1841  | 100  | 4  | 2  | 2  | 1.00 | 0.64 | 0.96 | 0.88 | 0.85 | 1.56 | 1.05 |
| X019923 | BCG_1845  | 81   | 4  | 3  | 3  | 1.00 | 0.84 | 0.81 | 0.94 | 0.82 | 1.19 | 0.93 |
| X019923 | BCG_1846C | 482  | 14 | 9  | 9  | 1.00 | 0.91 | 0.97 | 1.08 | 1.17 | 1.10 | 0.76 |
| X019923 | BCG_1850  | 159  | 7  | 3  | 3  | 1.00 | 0.54 | 0.64 | 0.71 | 0.96 | 1.85 | 0.66 |
| X019923 | BCG_1852  | 92   | 3  | 3  | 3  | 1.00 | 0.84 | 0.88 | 1.03 | 1.04 | 1.19 | 0.64 |
| X019923 | BCG_1854C | 1307 | 35 | 25 | 27 | 1.00 | 0.95 | 0.87 | 1.01 | 1.00 | 1.05 | 1.04 |
| X019923 | BCG_1855  | 426  | 10 | 6  | 6  | 1.00 | 0.82 | 0.82 | 0.98 | 1.24 | 1.23 | 0.77 |
| X019923 | BCG_1856  | 973  | 36 | 19 | 24 | 1.00 | 0.89 | 0.92 | 1.01 | 1.05 | 1.13 | 0.89 |
| X019923 | BCG_1857  | 229  | 7  | 5  | 6  | 1.00 | 0.79 | 0.72 | 0.89 | 0.87 | 1.27 | 0.80 |
| X019923 | BCG_1858  | 204  | 6  | 6  | 6  | 1.00 | 0.88 | 0.80 | 1.02 | 0.93 | 1.13 | 0.92 |
| X019923 | BCG_1860  | 381  | 15 | 7  | 11 | 1.00 | 0.95 | 0.95 | 0.97 | 0.96 | 1.05 | 0.90 |
| X019923 | BCG_1862  | 492  | 18 | 8  | 11 | 1.00 | 0.90 | 0.96 | 1.09 | 1.32 | 1.11 | 0.69 |
| X019923 | BCG_1864  | 165  | 6  | 3  | 3  | 1.00 | 0.83 | 0.80 | 0.93 | 1.03 | 1.20 | 0.72 |
| X019923 | BCG_1865  | 240  | 6  | 4  | 5  | 1.00 | 0.82 | 0.88 | 1.01 | 1.16 | 1.22 | 0.75 |
| X019923 | BCG_1867  | 403  | 11 | 9  | 10 | 1.00 | 1.08 | 1.11 | 1.06 | 1.09 | 0.93 | 1.09 |
| X019923 | BCG_1868C | 313  | 26 | 7  | 7  | 1.00 | 0.91 | 0.90 | 0.98 | 1.00 | 1.10 | 0.87 |
| X019923 | BCG_1870C | 122  | 7  | 3  | 3  | 1.00 | 0.95 | 0.66 | 0.97 | 1.16 | 1.05 | 0.91 |
| X019923 | BCG_1871C | 546  | 18 | 8  | 12 | 1.00 | 0.96 | 0.86 | 0.94 | 0.88 | 1.04 | 0.85 |
| X019923 | BCG_1872C | 1726 | 88 | 34 | 59 | 1.00 | 0.92 | 1.03 | 1.15 | 1.19 | 1.08 | 0.72 |
| X019923 | BCG_1877C | 270  | 8  | 5  | 5  | 1.00 | 1.00 | 0.90 | 0.94 | 0.96 | 1.00 | 0.95 |
| X019923 | BCG_1878C | 403  | 12 | 10 | 10 | 1.00 | 0.87 | 0.85 | 0.92 | 0.92 | 1.15 | 0.85 |
| X019923 | BCG_1879C | 841  | 19 | 13 | 14 | 1.00 | 0.95 | 0.90 | 1.04 | 1.15 | 1.05 | 0.86 |
| X019923 | BCG_1883  | 128  | 4  | 4  | 4  | 1.00 | 0.98 | 0.98 | 1.17 | 1.19 | 1.02 | 0.60 |
| X019923 | BCG_1884  | 89   | 4  | 2  | 2  | 1.00 | 0.37 | 0.53 | 0.73 | 0.92 | 2.69 | 0.78 |
| X019923 | BCG_1886  | 236  | 7  | 6  | 6  | 1.00 | 0.89 | 0.81 | 1.10 | 0.97 | 1.12 | 0.86 |
| X019923 | BCG_1888  | 225  | 10 | 5  | 5  | 1.00 | 0.82 | 0.75 | 0.94 | 0.92 | 1.22 | 0.85 |
| X019923 | BCG_1889  | 52   | 4  | 2  | 2  | 1.00 | 0.74 | 0.83 | 0.94 | 0.99 | 1.34 | 0.89 |
| X019923 | BCG_1890C | 501  | 16 | 8  | 9  | 1.00 | 0.90 | 0.88 | 0.96 | 0.98 | 1.12 | 0.86 |
| X019923 | BCG_1891C | 542  | 12 | 10 | 11 | 1.00 | 0.99 | 1.02 | 1.21 | 1.31 | 1.01 | 0.83 |
| X019923 | BCG_1892C | 394  | 13 | 7  | 11 | 1.00 | 0.87 | 0.78 | 0.95 | 0.89 | 1.15 | 0.79 |

|         |           |      |    |    |    |      |      |      |      |      |      |      |
|---------|-----------|------|----|----|----|------|------|------|------|------|------|------|
| X019923 | BCG_1896  | 162  | 5  | 3  | 4  | 1.00 | 0.86 | 0.73 | 1.27 | 1.01 | 1.16 | 0.58 |
| X019923 | BCG_1900C | 105  | 5  | 4  | 4  | 1.00 | 0.93 | 0.93 | 1.15 | 1.18 | 1.08 | 1.12 |
| X019923 | BCG_1901C | 389  | 13 | 9  | 9  | 1.00 | 0.95 | 0.86 | 0.96 | 1.08 | 1.05 | 0.88 |
| X019923 | BCG_1905C | 1032 | 37 | 21 | 29 | 1.00 | 0.88 | 0.90 | 1.12 | 1.27 | 1.13 | 0.77 |
| X019923 | BCG_1907C | 242  | 9  | 7  | 9  | 1.00 | 0.87 | 0.86 | 0.99 | 1.00 | 1.14 | 0.72 |
| X019923 | BCG_1908C | 1332 | 66 | 21 | 49 | 1.00 | 0.88 | 0.82 | 0.94 | 0.97 | 1.14 | 1.00 |
| X019923 | BCG_1910  | 96   | 2  | 2  | 2  | 1.00 | 0.93 | 1.09 | 1.07 | 0.84 | 1.08 | 0.94 |
| X019923 | BCG_1911  | 254  | 7  | 4  | 6  | 1.00 | 0.83 | 0.92 | 1.05 | 1.16 | 1.21 | 0.70 |
| X019923 | BCG_1912  | 536  | 21 | 9  | 16 | 1.00 | 0.78 | 0.73 | 0.64 | 0.78 | 1.29 | 0.78 |
| X019923 | BCG_1915  | 362  | 8  | 7  | 8  | 1.00 | 0.96 | 0.86 | 1.09 | 0.95 | 1.04 | 1.02 |
| X019923 | BCG_1917C | 581  | 21 | 14 | 15 | 1.00 | 0.90 | 0.85 | 1.06 | 1.08 | 1.11 | 0.83 |
| X019923 | BCG_1919C | 331  | 10 | 7  | 8  | 1.00 | 0.86 | 0.86 | 0.94 | 1.10 | 1.16 | 0.76 |
| X019923 | BCG_1920C | 297  | 12 | 5  | 7  | 1.00 | 0.87 | 1.11 | 1.30 | 1.45 | 1.15 | 0.45 |
| X019923 | BCG_1922C | 63   | 3  | 2  | 2  | 1.00 | 0.85 | 0.85 | 1.17 | 1.20 | 1.18 | 0.89 |
| X019923 | BCG_1923C | 169  | 7  | 4  | 5  | 1.00 | 0.98 | 0.87 | 1.10 | 1.19 | 1.02 | 0.73 |
| X019923 | BCG_1925C | 498  | 19 | 10 | 15 | 1.00 | 0.83 | 0.83 | 0.97 | 0.98 | 1.20 | 1.07 |
| X019923 | BCG_1928C | 116  | 5  | 3  | 3  | 1.00 | 0.92 | 0.91 | 1.12 | 1.04 | 1.08 | 0.97 |
| X019923 | BCG_1932C | 92   | 4  | 3  | 3  | 1.00 | 1.00 | 0.96 | 1.24 | 1.29 | 1.00 | 0.72 |
| X019923 | BCG_1935C | 219  | 8  | 5  | 5  | 1.00 | 0.75 | 0.92 | 0.99 | 1.06 | 1.34 | 0.62 |
| X019923 | BCG_1937  | 103  | 5  | 3  | 4  | 1.00 | 0.84 | 0.89 | 1.13 | 1.12 | 1.19 | 0.63 |
| X019923 | BCG_1938C | 193  | 6  | 4  | 4  | 1.00 | 1.09 | 1.24 | 1.34 | 1.47 | 0.92 | 0.96 |
| X019923 | BCG_1939C | 141  | 11 | 3  | 3  | 1.00 | 0.86 | 0.98 | 1.07 | 1.34 | 1.16 | 0.96 |
| X019923 | BCG_1940  | 356  | 12 | 7  | 8  | 1.00 | 1.14 | 0.92 | 1.12 | 1.30 | 0.88 | 0.87 |
| X019923 | BCG_1943  | 77   | 3  | 2  | 2  | 1.00 | 0.86 | 0.69 | 0.82 | 0.76 | 1.16 | 0.67 |
| X019923 | BCG_1944C | 226  | 9  | 5  | 5  | 1.00 | 0.89 | 0.89 | 1.17 | 1.19 | 1.13 | 0.79 |
| X019923 | BCG_1947C | 1650 | 81 | 27 | 61 | 1.00 | 0.94 | 0.96 | 1.08 | 1.12 | 1.06 | 0.83 |
| X019923 | BCG_1951C | 660  | 47 | 15 | 24 | 1.00 | 0.88 | 0.89 | 0.97 | 1.04 | 1.14 | 0.77 |
| X019923 | BCG_1953C | 123  | 5  | 3  | 4  | 1.00 | 0.93 | 0.91 | 1.14 | 1.04 | 1.07 | 0.70 |
| X019923 | BCG_1954  | 2007 | 96 | 42 | 74 | 1.00 | 0.93 | 0.84 | 0.84 | 0.81 | 1.08 | 0.84 |
| X019923 | BCG_1958C | 513  | 24 | 10 | 15 | 1.00 | 0.79 | 0.97 | 1.28 | 1.64 | 1.26 | 0.50 |
| X019923 | BCG_1960C | 150  | 5  | 2  | 2  | 1.00 | 0.67 | 1.04 | 0.98 | 1.04 | 1.49 | 0.77 |
| X019923 | BCG_1962  | 110  | 9  | 2  | 2  | 1.00 | 0.91 | 1.17 | 1.15 | 1.05 | 1.10 | 0.97 |
| X019923 | BCG_1963C | 222  | 8  | 5  | 6  | 1.00 | 0.88 | 0.78 | 0.86 | 0.86 | 1.13 | 0.87 |
| X019923 | BCG_1964  | 1292 | 35 | 25 | 31 | 1.00 | 0.89 | 0.89 | 0.96 | 0.93 | 1.12 | 0.92 |
| X019923 | BCG_1966  | 82   | 5  | 3  | 3  | 1.00 | 0.65 | 0.63 | 1.00 | 0.66 | 1.53 | 0.59 |
| X019923 | BCG_1968C | 332  | 12 | 7  | 9  | 1.00 | 0.89 | 0.88 | 0.90 | 0.87 | 1.12 | 0.70 |
| X019923 | BCG_1971  | 301  | 14 | 5  | 9  | 1.00 | 0.81 | 0.86 | 1.00 | 1.08 | 1.23 | 0.58 |
| X019923 | BCG_1981C | 179  | 4  | 4  | 4  | 1.00 | 0.83 | 0.79 | 1.28 | 1.28 | 1.20 | 0.87 |
| X019923 | BCG_1994  | 106  | 5  | 3  | 3  | 1.00 | 0.80 | 0.68 | 0.85 | 0.75 | 1.25 | 0.89 |



|         |           |      |     |    |    |      |      |      |      |      |      |      |
|---------|-----------|------|-----|----|----|------|------|------|------|------|------|------|
| X019923 | BCG_1995  | 246  | 10  | 5  | 5  | 1.00 | 0.92 | 0.91 | 0.91 | 1.03 | 1.08 | 0.80 |
| X019923 | BCG_1996  | 237  | 6   | 6  | 6  | 1.00 | 0.90 | 0.79 | 0.83 | 0.87 | 1.11 | 0.85 |
| X019923 | BCG_1999C | 53   | 2   | 2  | 2  | 1.00 | 1.17 | 0.89 | 2.64 | 1.23 | 0.85 | 0.92 |
| X019923 | BCG_2002C | 212  | 8   | 5  | 6  | 1.00 | 0.98 | 0.83 | 0.93 | 0.99 | 1.02 | 0.78 |
| X019923 | BCG_2005C | 170  | 4   | 3  | 3  | 1.00 | 0.79 | 0.80 | 1.01 | 1.07 | 1.26 | 0.69 |
| X019923 | BCG_2009C | 434  | 15  | 8  | 8  | 1.00 | 0.87 | 0.79 | 0.95 | 0.86 | 1.15 | 1.06 |
| X019923 | BCG_2010C | 339  | 11  | 8  | 9  | 1.00 | 0.89 | 0.95 | 1.19 | 1.15 | 1.12 | 0.77 |
| X019923 | BCG_2012  | 43   | 4   | 2  | 2  | 1.00 | 0.50 | 0.69 | 0.74 | 0.66 | 2.00 | 0.57 |
| X019923 | BCG_2013  | 374  | 10  | 8  | 8  | 1.00 | 0.85 | 0.93 | 1.06 | 1.05 | 1.17 | 0.84 |
| X019923 | BCG_2015C | 178  | 5   | 4  | 4  | 1.00 | 0.92 | 0.83 | 1.14 | 1.16 | 1.09 | 0.69 |
| X019923 | BCG_2017  | 308  | 8   | 6  | 6  | 1.00 | 0.87 | 0.94 | 1.04 | 1.10 | 1.15 | 0.83 |
| X019923 | BCG_2018  | 93   | 5   | 3  | 3  | 1.00 | 0.83 | 0.89 | 1.05 | 1.11 | 1.21 | 0.99 |
| X019923 | BCG_2019  | 115  | 5   | 3  | 4  | 1.00 | 0.88 | 1.01 | 0.99 | 1.28 | 1.14 | 0.70 |
| X019923 | BCG_2020C | 406  | 14  | 9  | 10 | 1.00 | 0.88 | 0.83 | 0.83 | 0.79 | 1.13 | 0.73 |
| X019923 | BCG_2021C | 531  | 24  | 12 | 13 | 1.00 | 0.95 | 1.01 | 1.08 | 1.08 | 1.05 | 1.04 |
| X019923 | BCG_2022C | 388  | 11  | 8  | 10 | 1.00 | 0.89 | 0.89 | 0.93 | 0.94 | 1.13 | 0.83 |
| X019923 | BCG_2025C | 78   | 5   | 3  | 3  | 1.00 | 0.92 | 0.75 | 1.28 | 1.15 | 1.09 | 0.65 |
| X019923 | BCG_2027  | 110  | 5   | 3  | 3  | 1.00 | 0.57 | 0.93 | 1.17 | 0.88 | 1.75 | 0.73 |
| X019923 | BCG_2035  | 440  | 11  | 10 | 10 | 1.00 | 0.92 | 0.90 | 1.08 | 0.96 | 1.09 | 0.79 |
| X019923 | BCG_2036  | 126  | 4   | 3  | 3  | 1.00 | 1.13 | 0.94 | 0.90 | 1.33 | 0.89 | 0.82 |
| X019923 | BCG_2039C | 54   | 2   | 2  | 2  | 1.00 | 0.86 | 0.85 | 0.79 | 1.03 | 1.16 | 0.88 |
| X019923 | BCG_2043C | 147  | 14  | 3  | 3  | 1.00 | 0.69 | 0.81 | 0.86 | 0.81 | 1.46 | 0.92 |
| X019923 | BCG_2045C | 176  | 5   | 3  | 3  | 1.00 | 0.74 | 0.86 | 0.94 | 1.21 | 1.34 | 0.76 |
| X019923 | BCG_2046C | 105  | 7   | 3  | 3  | 1.00 | 0.75 | 0.87 | 0.84 | 0.65 | 1.34 | 0.85 |
| X019923 | BCG_2047C | 156  | 7   | 2  | 2  | 1.00 | 0.74 | 0.84 | 1.04 | 0.75 | 1.35 | 0.66 |
| X019923 | BCG_2049C | 540  | 22  | 13 | 14 | 1.00 | 0.87 | 0.85 | 1.03 | 1.00 | 1.15 | 0.86 |
| X019923 | BCG_2050C | 515  | 32  | 10 | 16 | 1.00 | 0.87 | 0.89 | 0.96 | 1.07 | 1.15 | 0.77 |
| X019923 | BCG_2051  | 322  | 10  | 6  | 6  | 1.00 | 0.78 | 0.84 | 1.03 | 1.06 | 1.28 | 0.76 |
| X019923 | BCG_2052C | 68   | 3   | 3  | 3  | 1.00 | 0.94 | 1.05 | 0.84 | 1.16 | 1.06 | 0.74 |
| X019923 | BCG_2054  | 207  | 6   | 5  | 5  | 1.00 | 0.86 | 0.78 | 1.01 | 1.02 | 1.17 | 0.68 |
| X019923 | BCG_2056C | 122  | 6   | 5  | 5  | 1.00 | 0.85 | 0.94 | 1.03 | 1.13 | 1.18 | 0.82 |
| X019923 | BCG_2057C | 95   | 5   | 2  | 2  | 1.00 | 0.91 | 0.92 | 1.03 | 1.12 | 1.10 | 0.84 |
| X019923 | BCG_2060C | 130  | 5   | 3  | 3  | 1.00 | 0.85 | 1.06 | 1.35 | 1.15 | 1.18 | 1.21 |
| X019923 | BCG_2061C | 377  | 10  | 8  | 8  | 1.00 | 0.92 | 0.88 | 0.95 | 1.16 | 1.09 | 0.67 |
| X019923 | BCG_2064C | 81   | 6   | 2  | 2  | 1.00 | 0.92 | 1.02 | 1.18 | 0.88 | 1.09 | 1.06 |
| X019923 | BCG_2066C | 663  | 23  | 14 | 16 | 1.00 | 0.94 | 0.85 | 0.86 | 0.73 | 1.07 | 0.93 |
| X019923 | BCG_2067C | 4002 | 163 | 76 | 99 | 1.00 | 0.81 | 0.69 | 0.85 | 0.73 | 1.23 | 0.88 |
| X019923 | BCG_2068C | 214  | 6   | 3  | 3  | 1.00 | 0.93 | 0.86 | 0.84 | 1.05 | 1.07 | 0.74 |
| X019923 | BCG_2069  | 258  | 8   | 5  | 6  | 1.00 | 0.81 | 0.84 | 0.91 | 0.87 | 1.23 | 0.78 |

|         |           |      |    |    |    |      |      |      |      |      |      |      |
|---------|-----------|------|----|----|----|------|------|------|------|------|------|------|
| X019923 | BCG_2070C | 1017 | 43 | 16 | 23 | 1.00 | 0.95 | 0.84 | 0.87 | 0.93 | 1.05 | 0.94 |
| X019923 | BCG_2071C | 302  | 10 | 6  | 6  | 1.00 | 0.90 | 1.00 | 1.20 | 1.34 | 1.12 | 0.71 |
| X019923 | BCG_2073  | 881  | 63 | 15 | 35 | 1.00 | 0.87 | 1.00 | 1.30 | 1.42 | 1.15 | 0.47 |
| X019923 | BCG_2074C | 84   | 2  | 2  | 2  | 1.00 | 0.86 | 0.77 | 0.99 | 0.74 | 1.16 | 0.78 |
| X019923 | BCG_2080C | 256  | 10 | 5  | 6  | 1.00 | 0.81 | 0.82 | 0.94 | 1.11 | 1.23 | 0.79 |
| X019923 | BCG_2081C | 97   | 8  | 4  | 4  | 1.00 | 1.18 | 0.93 | 0.90 | 0.80 | 0.85 | 1.09 |
| X019923 | BCG_2083  | 96   | 6  | 2  | 2  | 1.00 | 0.60 | 0.89 | 0.94 | 1.03 | 1.65 | 0.69 |
| X019923 | BCG_2084  | 128  | 9  | 3  | 3  | 1.00 | 1.02 | 1.08 | 1.10 | 1.44 | 0.98 | 1.08 |
| X019923 | BCG_2085  | 144  | 8  | 5  | 5  | 1.00 | 0.98 | 0.93 | 1.51 | 1.24 | 1.02 | 1.04 |
| X019923 | BCG_2086C | 621  | 21 | 13 | 15 | 1.00 | 0.73 | 0.76 | 0.96 | 1.02 | 1.36 | 3.20 |
| X019923 | BCG_2087C | 211  | 12 | 5  | 5  | 1.00 | 0.95 | 0.74 | 0.99 | 1.07 | 1.05 | 0.83 |
| X019923 | BCG_2101  | 122  | 5  | 2  | 2  | 1.00 | 0.91 | 0.78 | 0.82 | 0.76 | 1.10 | 0.89 |
| X019923 | BCG_2103  | 198  | 10 | 3  | 3  | 1.00 | 0.83 | 0.71 | 1.12 | 0.89 | 1.20 | 0.79 |
| X019923 | BCG_2108  | 111  | 5  | 3  | 3  | 1.00 | 0.59 | 0.67 | 0.68 | 0.78 | 1.70 | 1.08 |
| X019923 | BCG_2109C | 101  | 3  | 2  | 2  | 1.00 | 0.74 | 0.74 | 0.95 | 0.90 | 1.35 | 0.61 |
| X019923 | BCG_2110  | 135  | 6  | 3  | 3  | 1.00 | 0.93 | 0.97 | 1.07 | 1.15 | 1.07 | 0.77 |
| X019923 | BCG_2111C | 600  | 17 | 8  | 13 | 1.00 | 0.98 | 0.89 | 1.00 | 1.07 | 1.02 | 1.13 |
| X019923 | BCG_2112C | 1437 | 43 | 30 | 31 | 1.00 | 0.93 | 0.76 | 0.74 | 0.70 | 1.08 | 0.88 |
| X019923 | BCG_2114C | 215  | 4  | 3  | 3  | 1.00 | 0.79 | 0.99 | 1.08 | 1.24 | 1.26 | 0.82 |
| X019923 | BCG_2115C | 256  | 12 | 6  | 7  | 1.00 | 1.00 | 0.98 | 1.18 | 1.58 | 1.00 | 0.78 |
| X019923 | BCG_2116C | 179  | 9  | 3  | 4  | 1.00 | 0.87 | 0.89 | 1.02 | 1.15 | 1.14 | 0.80 |
| X019923 | BCG_2117C | 1411 | 47 | 25 | 32 | 1.00 | 0.90 | 0.83 | 1.00 | 0.92 | 1.12 | 0.87 |
| X019923 | BCG_2120  | 632  | 23 | 16 | 17 | 1.00 | 0.84 | 0.82 | 0.84 | 0.79 | 1.19 | 0.84 |
| X019923 | BCG_2121  | 142  | 4  | 3  | 4  | 1.00 | 0.95 | 0.96 | 1.04 | 0.99 | 1.05 | 0.79 |
| X019923 | BCG_2126C | 703  | 27 | 11 | 17 | 1.00 | 0.84 | 0.82 | 0.87 | 0.82 | 1.19 | 0.81 |
| X019923 | BCG_2127C | 642  | 35 | 11 | 23 | 1.00 | 0.90 | 0.84 | 0.90 | 0.87 | 1.11 | 0.82 |
| X019923 | BCG_2128C | 292  | 10 | 5  | 7  | 1.00 | 0.80 | 0.87 | 0.81 | 0.79 | 1.26 | 0.66 |
| X019923 | BCG_2129C | 416  | 16 | 9  | 10 | 1.00 | 0.81 | 0.89 | 1.06 | 1.13 | 1.23 | 0.74 |
| X019923 | BCG_2131  | 112  | 5  | 3  | 4  | 1.00 | 0.95 | 0.92 | 1.03 | 1.09 | 1.05 | 0.64 |
| X019923 | BCG_2132C | 1321 | 49 | 25 | 34 | 1.00 | 0.88 | 0.75 | 0.81 | 0.75 | 1.14 | 0.86 |
| X019923 | BCG_2134  | 91   | 2  | 2  | 2  | 1.00 | 0.83 | 1.37 | 1.21 | 0.79 | 1.20 | 0.94 |
| X019923 | BCG_2135C | 732  | 19 | 13 | 16 | 1.00 | 0.95 | 1.01 | 1.08 | 1.15 | 1.06 | 0.77 |
| X019923 | BCG_2136  | 130  | 7  | 3  | 3  | 1.00 | 0.83 | 1.03 | 1.30 | 1.00 | 1.20 | 0.94 |
| X019923 | BCG_2138C | 369  | 11 | 5  | 6  | 1.00 | 0.88 | 0.82 | 1.01 | 1.03 | 1.14 | 0.83 |
| X019923 | BCG_2141C | 679  | 26 | 14 | 15 | 1.00 | 0.88 | 0.89 | 0.94 | 0.98 | 1.14 | 0.97 |
| X019923 | BCG_2142  | 87   | 4  | 2  | 2  | 1.00 | 0.89 | 0.76 | 0.82 | 0.98 | 1.12 | 0.73 |
| X019923 | BCG_2144  | 185  | 8  | 4  | 5  | 1.00 | 0.75 | 0.80 | 0.92 | 0.92 | 1.33 | 0.92 |
| X019923 | BCG_2146C | 715  | 24 | 17 | 21 | 1.00 | 0.90 | 0.91 | 0.98 | 1.13 | 1.11 | 0.88 |
| X019923 | BCG_2147C | 657  | 21 | 13 | 15 | 1.00 | 0.89 | 0.82 | 0.95 | 0.89 | 1.12 | 1.57 |

|         |           |      |    |    |    |      |      |      |      |      |      |      |
|---------|-----------|------|----|----|----|------|------|------|------|------|------|------|
| X019923 | BCG_2148C | 298  | 9  | 7  | 8  | 1.00 | 0.89 | 0.84 | 1.03 | 1.09 | 1.13 | 0.72 |
| X019923 | BCG_2150C | 611  | 39 | 9  | 30 | 1.00 | 0.66 | 0.79 | 0.81 | 0.78 | 1.52 | 0.70 |
| X019923 | BCG_2151C | 403  | 11 | 9  | 9  | 1.00 | 0.71 | 0.82 | 0.77 | 0.78 | 1.40 | 0.68 |
| X019923 | BCG_2152C | 243  | 10 | 6  | 6  | 1.00 | 0.89 | 0.96 | 1.01 | 1.04 | 1.12 | 0.81 |
| X019923 | BCG_2155  | 179  | 6  | 5  | 5  | 1.00 | 0.81 | 0.76 | 1.02 | 1.16 | 1.24 | 0.93 |
| X019923 | BCG_2156  | 458  | 14 | 10 | 11 | 1.00 | 0.85 | 0.85 | 0.94 | 1.05 | 1.17 | 0.77 |
| X019923 | BCG_2157C | 398  | 18 | 7  | 12 | 1.00 | 0.84 | 0.87 | 1.02 | 1.17 | 1.19 | 0.61 |
| X019923 | BCG_2158C | 272  | 9  | 6  | 6  | 1.00 | 0.93 | 0.82 | 1.01 | 1.12 | 1.07 | 0.77 |
| X019923 | BCG_2162C | 1323 | 62 | 22 | 45 | 1.00 | 0.85 | 0.81 | 0.86 | 0.72 | 1.18 | 0.58 |
| X019923 | BCG_2163C | 91   | 2  | 2  | 2  | 1.00 | 0.84 | 1.06 | 1.21 | 1.43 | 1.19 | 0.78 |
| X019923 | BCG_2164C | 276  | 11 | 5  | 5  | 1.00 | 0.80 | 0.73 | 0.94 | 0.94 | 1.25 | 0.66 |
| X019923 | BCG_2165C | 166  | 6  | 3  | 3  | 1.00 | 0.43 | 0.78 | 0.71 | 0.64 | 2.33 | 0.39 |
| X019923 | BCG_2166C | 232  | 7  | 5  | 5  | 1.00 | 0.83 | 0.74 | 0.89 | 0.99 | 1.20 | 0.63 |
| X019923 | BCG_2167C | 778  | 28 | 12 | 19 | 1.00 | 0.85 | 0.90 | 1.09 | 1.15 | 1.18 | 0.70 |
| X019923 | BCG_2168C | 671  | 23 | 12 | 13 | 1.00 | 0.86 | 0.80 | 0.88 | 0.84 | 1.16 | 0.80 |
| X019923 | BCG_2169C | 292  | 15 | 8  | 9  | 1.00 | 0.99 | 0.98 | 1.23 | 1.33 | 1.01 | 0.88 |
| X019923 | BCG_2170C | 530  | 17 | 11 | 12 | 1.00 | 0.89 | 0.83 | 0.96 | 0.88 | 1.12 | 0.85 |
| X019923 | BCG_2172C | 459  | 10 | 8  | 8  | 1.00 | 0.85 | 0.98 | 1.47 | 1.32 | 1.17 | 0.84 |
| X019923 | BCG_2173C | 194  | 5  | 4  | 4  | 1.00 | 0.69 | 0.71 | 0.68 | 0.80 | 1.44 | 0.85 |
| X019923 | BCG_2174C | 290  | 11 | 5  | 6  | 1.00 | 1.04 | 0.99 | 1.22 | 1.34 | 0.96 | 0.82 |
| X019923 | BCG_2175C | 407  | 12 | 8  | 8  | 1.00 | 0.79 | 1.02 | 1.23 | 1.20 | 1.26 | 0.73 |
| X019923 | BCG_2176C | 188  | 10 | 5  | 5  | 1.00 | 1.03 | 1.02 | 1.40 | 1.21 | 0.97 | 1.21 |
| X019923 | BCG_2182C | 335  | 12 | 7  | 7  | 1.00 | 1.00 | 0.92 | 0.94 | 1.12 | 1.00 | 0.74 |
| X019923 | BCG_2183C | 365  | 15 | 8  | 13 | 1.00 | 0.89 | 0.82 | 0.95 | 0.94 | 1.13 | 0.88 |
| X019923 | BCG_2185  | 86   | 5  | 3  | 3  | 1.00 | 0.91 | 0.88 | 1.30 | 1.31 | 1.10 | 0.73 |
| X019923 | BCG_2187C | 339  | 15 | 7  | 8  | 1.00 | 0.82 | 0.96 | 1.12 | 1.23 | 1.22 | 0.68 |
| X019923 | BCG_2188  | 216  | 9  | 7  | 7  | 1.00 | 1.03 | 0.95 | 0.96 | 1.25 | 0.97 | 0.92 |
| X019923 | BCG_2189  | 127  | 5  | 2  | 2  | 1.00 | 1.13 | 0.82 | 0.84 | 0.99 | 0.88 | 1.12 |
| X019923 | BCG_2190C | 134  | 6  | 4  | 5  | 1.00 | 0.80 | 0.82 | 0.86 | 0.72 | 1.25 | 0.65 |
| X019923 | BCG_2191  | 44   | 3  | 2  | 2  | 1.00 | 0.77 | 0.75 | 1.33 | 0.63 | 1.29 | 0.87 |
| X019923 | BCG_2193C | 1043 | 36 | 18 | 28 | 1.00 | 0.98 | 0.88 | 1.03 | 1.06 | 1.02 | 0.93 |
| X019923 | BCG_2194C | 117  | 3  | 3  | 3  | 1.00 | 0.90 | 1.12 | 1.32 | 1.22 | 1.11 | 0.71 |
| X019923 | BCG_2196  | 240  | 8  | 5  | 7  | 1.00 | 0.87 | 0.84 | 0.85 | 0.95 | 1.15 | 1.00 |
| X019923 | BCG_2197C | 391  | 11 | 6  | 7  | 1.00 | 0.90 | 0.88 | 0.91 | 0.93 | 1.11 | 0.88 |
| X019923 | BCG_2198C | 58   | 2  | 2  | 2  | 1.00 | 1.03 | 0.43 | 0.65 | 0.79 | 0.97 | 0.31 |
| X019923 | BCG_2199C | 323  | 13 | 7  | 9  | 1.00 | 0.85 | 0.84 | 0.96 | 0.91 | 1.18 | 0.81 |
| X019923 | BCG_2200C | 575  | 27 | 9  | 22 | 1.00 | 0.93 | 0.94 | 1.10 | 1.21 | 1.07 | 0.72 |
| X019923 | BCG_2201C | 167  | 12 | 5  | 8  | 1.00 | 0.95 | 0.96 | 1.15 | 1.00 | 1.06 | 0.99 |
| X019923 | BCG_2204C | 427  | 17 | 9  | 10 | 1.00 | 0.91 | 0.94 | 1.04 | 1.06 | 1.10 | 0.82 |

|         |           |      |      |    |      |      |      |      |      |      |      |      |
|---------|-----------|------|------|----|------|------|------|------|------|------|------|------|
| X019923 | BCG_2206C | 234  | 11   | 4  | 4    | 1.00 | 0.92 | 0.79 | 1.09 | 0.88 | 1.09 | 0.98 |
| X019923 | BCG_2208C | 203  | 8    | 3  | 4    | 1.00 | 0.95 | 0.96 | 1.25 | 1.36 | 1.06 | 0.87 |
| X019923 | BCG_2210  | 293  | 12   | 8  | 10   | 1.00 | 0.84 | 0.90 | 0.97 | 1.09 | 1.19 | 0.85 |
| X019923 | BCG_2211  | 884  | 38   | 17 | 25   | 1.00 | 0.87 | 0.84 | 0.94 | 0.94 | 1.15 | 0.95 |
| X019923 | BCG_2212  | 593  | 24   | 13 | 18   | 1.00 | 0.82 | 0.84 | 0.91 | 0.87 | 1.22 | 0.93 |
| X019923 | BCG_2213C | 146  | 7    | 3  | 4    | 1.00 | 0.91 | 0.93 | 1.06 | 1.12 | 1.10 | 0.82 |
| X019923 | BCG_2216C | 582  | 30   | 14 | 24   | 1.00 | 0.88 | 0.85 | 0.93 | 0.97 | 1.13 | 1.01 |
| X019923 | BCG_2217  | 612  | 15   | 11 | 11   | 1.00 | 0.91 | 0.88 | 1.02 | 0.88 | 1.10 | 0.92 |
| X019923 | BCG_2218C | 725  | 34   | 12 | 25   | 1.00 | 0.88 | 0.91 | 1.07 | 1.25 | 1.14 | 0.69 |
| X019923 | BCG_2219  | 495  | 14   | 7  | 9    | 1.00 | 0.95 | 0.80 | 0.92 | 0.94 | 1.05 | 0.95 |
| X019923 | BCG_2220C | 574  | 18   | 8  | 11   | 1.00 | 0.86 | 0.82 | 0.94 | 0.96 | 1.16 | 0.59 |
| X019923 | BCG_2222  | 56   | 2    | 2  | 2    | 1.00 | 0.92 | 0.66 | 0.74 | 0.77 | 1.08 | 0.69 |
| X019923 | BCG_2223  | 259  | 13   | 6  | 8    | 1.00 | 0.79 | 0.90 | 1.03 | 1.07 | 1.27 | 0.69 |
| X019923 | BCG_2226C | 553  | 14   | 12 | 12   | 1.00 | 0.92 | 0.93 | 1.18 | 1.27 | 1.09 | 0.77 |
| X019923 | BCG_2227C | 193  | 10   | 4  | 8    | 1.00 | 0.89 | 0.97 | 1.16 | 1.23 | 1.12 | 0.69 |
| X019923 | BCG_2228  | 167  | 4    | 3  | 4    | 1.00 | 0.75 | 1.09 | 1.24 | 1.11 | 1.33 | 1.29 |
| X019923 | BCG_2230C | 724  | 22   | 10 | 14   | 1.00 | 0.91 | 0.90 | 1.05 | 1.02 | 1.10 | 0.95 |
| X019923 | BCG_2231  | 1388 | 56   | 22 | 46   | 1.00 | 0.91 | 0.83 | 0.91 | 0.75 | 1.10 | 0.78 |
| X019923 | BCG_2232  | 186  | 8    | 4  | 5    | 1.00 | 0.85 | 0.96 | 1.12 | 1.33 | 1.18 | 0.70 |
| X019923 | BCG_2234  | 126  | 6    | 2  | 2    | 1.00 | 0.82 | 0.86 | 0.86 | 1.00 | 1.22 | 0.59 |
| X019923 | BCG_2235  | 569  | 17   | 11 | 15   | 1.00 | 0.90 | 0.83 | 0.92 | 0.99 | 1.12 | 0.80 |
| X019923 | BCG_2237  | 2911 | 2026 | 36 | 1277 | 1.00 | 0.73 | 0.76 | 0.80 | 0.75 | 1.37 | 0.69 |
| X019923 | BCG_2238C | 146  | 6    | 3  | 3    | 1.00 | 0.98 | 1.21 | 1.02 | 1.13 | 1.02 | 1.14 |
| X019923 | BCG_2239C | 557  | 31   | 9  | 14   | 1.00 | 0.95 | 0.93 | 1.05 | 1.11 | 1.05 | 0.86 |
| X019923 | BCG_2241C | 942  | 33   | 18 | 26   | 1.00 | 0.86 | 0.86 | 0.88 | 0.98 | 1.16 | 1.06 |
| X019923 | BCG_2242  | 71   | 3    | 2  | 2    | 1.00 | 1.06 | 0.73 | 0.97 | 1.21 | 0.94 | 0.83 |
| X019923 | BCG_2243  | 1103 | 30   | 21 | 25   | 1.00 | 0.88 | 0.86 | 0.90 | 0.88 | 1.13 | 0.91 |
| X019923 | BCG_2246C | 564  | 12   | 10 | 11   | 1.00 | 0.94 | 0.91 | 1.17 | 1.32 | 1.07 | 0.85 |
| X019923 | BCG_2247C | 280  | 8    | 6  | 6    | 1.00 | 0.89 | 0.89 | 1.15 | 1.23 | 1.13 | 0.76 |
| X019923 | BCG_2248C | 289  | 7    | 7  | 7    | 1.00 | 0.92 | 0.85 | 0.96 | 0.97 | 1.09 | 0.97 |
| X019923 | BCG_2249C | 215  | 8    | 6  | 6    | 1.00 | 0.68 | 0.72 | 0.84 | 0.91 | 1.47 | 0.61 |
| X019923 | BCG_2251  | 77   | 4    | 3  | 3    | 1.00 | 0.86 | 0.87 | 0.97 | 0.99 | 1.17 | 0.94 |
| X019923 | BCG_2252  | 174  | 3    | 3  | 3    | 1.00 | 1.04 | 1.02 | 1.22 | 1.18 | 0.96 | 0.98 |
| X019923 | BCG_2254  | 209  | 4    | 3  | 3    | 1.00 | 0.82 | 0.74 | 0.85 | 1.03 | 1.22 | 0.73 |
| X019923 | BCG_2255C | 215  | 9    | 4  | 5    | 1.00 | 0.87 | 0.90 | 1.01 | 1.03 | 1.15 | 1.10 |
| X019923 | BCG_2258  | 1118 | 52   | 23 | 31   | 1.00 | 0.90 | 0.86 | 0.83 | 0.94 | 1.11 | 0.97 |
| X019923 | BCG_2259  | 586  | 18   | 9  | 12   | 1.00 | 0.80 | 0.83 | 0.99 | 0.98 | 1.25 | 0.88 |
| X019923 | BCG_2260  | 338  | 10   | 7  | 8    | 1.00 | 0.85 | 0.95 | 1.11 | 1.16 | 1.18 | 0.64 |
| X019923 | BCG_2261  | 488  | 20   | 6  | 17   | 1.00 | 0.85 | 0.90 | 0.96 | 1.11 | 1.18 | 0.61 |

|         |           |      |    |    |    |      |      |      |      |      |      |      |
|---------|-----------|------|----|----|----|------|------|------|------|------|------|------|
| X019923 | BCG_2262  | 457  | 18 | 8  | 11 | 1.00 | 0.94 | 1.00 | 1.10 | 1.27 | 1.07 | 0.92 |
| X019923 | BCG_2263  | 786  | 31 | 13 | 23 | 1.00 | 0.91 | 0.91 | 1.13 | 1.29 | 1.10 | 0.76 |
| X019923 | BCG_2264  | 928  | 30 | 18 | 23 | 1.00 | 0.91 | 0.85 | 1.00 | 1.00 | 1.10 | 0.79 |
| X019923 | BCG_2267C | 413  | 15 | 9  | 9  | 1.00 | 0.86 | 1.00 | 1.04 | 0.95 | 1.16 | 0.91 |
| X019923 | BCG_2269  | 597  | 18 | 12 | 14 | 1.00 | 0.96 | 0.99 | 1.10 | 1.22 | 1.04 | 0.80 |
| X019923 | BCG_2270  | 301  | 13 | 7  | 8  | 1.00 | 0.90 | 0.92 | 0.97 | 0.94 | 1.11 | 0.83 |
| X019923 | BCG_2276C | 481  | 11 | 6  | 8  | 1.00 | 0.91 | 0.90 | 1.09 | 1.24 | 1.10 | 0.79 |
| X019923 | BCG_2277  | 309  | 9  | 7  | 7  | 1.00 | 0.90 | 0.84 | 1.20 | 1.24 | 1.11 | 0.86 |
| X019923 | BCG_2278  | 118  | 4  | 3  | 3  | 1.00 | 0.88 | 0.88 | 1.10 | 1.13 | 1.14 | 0.73 |
| X019923 | BCG_2280  | 168  | 7  | 5  | 5  | 1.00 | 0.95 | 0.90 | 1.08 | 1.16 | 1.06 | 0.81 |
| X019923 | BCG_2289  | 102  | 3  | 3  | 3  | 1.00 | 0.84 | 0.95 | 0.86 | 0.90 | 1.18 | 0.93 |
| X019923 | BCG_2293  | 120  | 4  | 3  | 3  | 1.00 | 1.01 | 1.06 | 1.24 | 1.60 | 0.99 | 0.87 |
| X019923 | BCG_2295  | 487  | 18 | 8  | 10 | 1.00 | 0.87 | 0.94 | 1.17 | 1.26 | 1.15 | 0.73 |
| X019923 | BCG_2299  | 620  | 23 | 10 | 16 | 1.00 | 0.86 | 0.83 | 0.91 | 0.90 | 1.16 | 0.90 |
| X019923 | BCG_2300  | 333  | 12 | 6  | 7  | 1.00 | 0.88 | 0.82 | 0.94 | 1.00 | 1.13 | 0.81 |
| X019923 | BCG_2305  | 400  | 14 | 8  | 8  | 1.00 | 0.93 | 0.82 | 0.85 | 0.84 | 1.08 | 0.83 |
| X019923 | BCG_2308  | 126  | 3  | 2  | 2  | 1.00 | 0.96 | 1.03 | 1.04 | 1.20 | 1.05 | 0.78 |
| X019923 | BCG_2310  | 483  | 17 | 13 | 13 | 1.00 | 0.82 | 0.85 | 0.99 | 1.05 | 1.22 | 0.71 |
| X019923 | BCG_2312  | 651  | 24 | 13 | 14 | 1.00 | 0.94 | 1.05 | 1.30 | 1.55 | 1.06 | 0.69 |
| X019923 | BCG_2313  | 105  | 7  | 2  | 2  | 1.00 | 0.92 | 0.95 | 1.04 | 1.25 | 1.09 | 1.11 |
| X019923 | BCG_2314  | 813  | 28 | 14 | 17 | 1.00 | 0.92 | 0.91 | 1.02 | 1.08 | 1.08 | 0.80 |
| X019923 | BCG_2315C | 1354 | 57 | 26 | 40 | 1.00 | 0.97 | 1.01 | 1.17 | 1.24 | 1.03 | 0.91 |
| X019923 | BCG_2316C | 95   | 5  | 2  | 2  | 1.00 | 0.79 | 0.77 | 0.95 | 0.77 | 1.27 | 0.70 |
| X019923 | BCG_2318  | 166  | 7  | 4  | 6  | 1.00 | 0.84 | 0.78 | 0.98 | 1.06 | 1.20 | 0.60 |
| X019923 | BCG_2319C | 69   | 3  | 2  | 2  | 1.00 | 0.69 | 0.60 | 0.58 | 0.88 | 1.45 | 0.71 |
| X019923 | BCG_2321  | 518  | 20 | 11 | 11 | 1.00 | 1.01 | 1.05 | 1.17 | 1.20 | 0.99 | 0.92 |
| X019923 | BCG_2334C | 114  | 4  | 4  | 4  | 1.00 | 0.86 | 0.76 | 1.01 | 0.77 | 1.17 | 1.00 |
| X019923 | BCG_2335C | 410  | 9  | 7  | 7  | 1.00 | 0.95 | 0.91 | 1.07 | 1.27 | 1.05 | 0.79 |
| X019923 | BCG_2336C | 561  | 14 | 13 | 13 | 1.00 | 0.97 | 1.07 | 1.23 | 1.35 | 1.03 | 0.91 |
| X019923 | BCG_2347C | 456  | 16 | 9  | 9  | 1.00 | 0.89 | 0.84 | 0.95 | 1.00 | 1.13 | 1.04 |
| X019923 | BCG_2351C | 88   | 3  | 3  | 3  | 1.00 | 0.86 | 0.77 | 0.96 | 1.18 | 1.17 | 0.86 |
| X019923 | BCG_2354  | 284  | 11 | 5  | 5  | 1.00 | 1.01 | 0.77 | 1.30 | 1.19 | 0.99 | 0.95 |
| X019923 | BCG_2356  | 620  | 21 | 13 | 16 | 1.00 | 0.79 | 0.95 | 1.13 | 1.35 | 1.27 | 0.68 |
| X019923 | BCG_2357  | 143  | 7  | 4  | 5  | 1.00 | 0.88 | 0.78 | 0.90 | 1.03 | 1.14 | 0.81 |
| X019923 | BCG_2359C | 221  | 9  | 5  | 6  | 1.00 | 0.91 | 0.92 | 0.97 | 0.86 | 1.10 | 0.75 |
| X019923 | BCG_2360C | 158  | 6  | 3  | 3  | 1.00 | 0.93 | 1.02 | 1.25 | 0.98 | 1.08 | 0.81 |
| X019923 | BCG_2365  | 121  | 6  | 3  | 4  | 1.00 | 0.73 | 0.75 | 0.83 | 0.70 | 1.36 | 0.65 |
| X019923 | BCG_2366C | 263  | 15 | 8  | 8  | 1.00 | 0.89 | 0.77 | 0.98 | 1.00 | 1.12 | 0.93 |
| X019923 | BCG_2367C | 404  | 12 | 9  | 10 | 1.00 | 0.93 | 1.00 | 1.11 | 1.27 | 1.07 | 1.01 |

|         |           |      |    |    |    |      |      |      |      |      |      |      |
|---------|-----------|------|----|----|----|------|------|------|------|------|------|------|
| X019923 | BCG_2368  | 1557 | 44 | 27 | 36 | 1.00 | 0.88 | 0.87 | 0.95 | 0.86 | 1.14 | 0.97 |
| X019923 | BCG_2371C | 704  | 20 | 14 | 17 | 1.00 | 0.91 | 0.94 | 1.02 | 1.13 | 1.09 | 0.89 |
| X019923 | BCG_2372  | 103  | 4  | 2  | 2  | 1.00 | 0.88 | 1.23 | 1.15 | 1.27 | 1.14 | 0.74 |
| X019923 | BCG_2373  | 112  | 7  | 2  | 2  | 1.00 | 0.91 | 0.72 | 0.99 | 0.91 | 1.10 | 0.55 |
| X019923 | BCG_2374C | 157  | 5  | 4  | 4  | 1.00 | 0.84 | 0.83 | 0.90 | 1.11 | 1.19 | 0.73 |
| X019923 | BCG_2375C | 131  | 7  | 4  | 5  | 1.00 | 0.92 | 0.91 | 0.82 | 1.08 | 1.09 | 0.93 |
| X019923 | BCG_2377  | 751  | 25 | 14 | 21 | 1.00 | 0.94 | 0.99 | 1.13 | 1.19 | 1.06 | 0.78 |
| X019923 | BCG_2378C | 134  | 6  | 4  | 4  | 1.00 | 0.82 | 0.96 | 1.13 | 1.12 | 1.23 | 0.72 |
| X019923 | BCG_2379C | 60   | 4  | 2  | 2  | 1.00 | 0.98 | 0.86 | 0.91 | 1.06 | 1.02 | 0.50 |
| X019923 | BCG_2380C | 369  | 15 | 8  | 10 | 1.00 | 0.84 | 0.82 | 0.91 | 0.88 | 1.19 | 0.87 |
| X019923 | BCG_2382C | 258  | 7  | 5  | 5  | 1.00 | 0.81 | 0.72 | 0.82 | 1.09 | 1.23 | 0.68 |
| X019923 | BCG_2387C | 822  | 31 | 18 | 27 | 1.00 | 0.88 | 0.87 | 1.00 | 0.97 | 1.13 | 0.92 |
| X019923 | BCG_2388C | 439  | 14 | 8  | 8  | 1.00 | 0.89 | 0.88 | 0.99 | 0.92 | 1.12 | 0.93 |
| X019923 | BCG_2389  | 115  | 3  | 3  | 3  | 1.00 | 1.02 | 1.03 | 1.16 | 1.16 | 0.98 | 0.87 |
| X019923 | BCG_2392C | 112  | 7  | 3  | 3  | 1.00 | 0.78 | 0.87 | 1.03 | 1.25 | 1.29 | 0.69 |
| X019923 | BCG_2394C | 394  | 17 | 10 | 10 | 1.00 | 0.76 | 0.83 | 0.82 | 0.68 | 1.32 | 1.09 |
| X019923 | BCG_2401  | 105  | 5  | 2  | 2  | 1.00 | 0.84 | 0.89 | 0.92 | 1.12 | 1.19 | 1.15 |
| X019923 | BCG_2405  | 649  | 26 | 14 | 15 | 1.00 | 0.89 | 0.94 | 1.11 | 1.24 | 1.12 | 0.76 |
| X019923 | BCG_2406  | 302  | 9  | 6  | 7  | 1.00 | 0.80 | 0.89 | 1.10 | 1.17 | 1.24 | 0.62 |
| X019923 | BCG_2408  | 502  | 13 | 10 | 10 | 1.00 | 0.84 | 0.91 | 0.99 | 1.06 | 1.19 | 0.87 |
| X019923 | BCG_2412C | 372  | 9  | 7  | 7  | 1.00 | 0.93 | 0.89 | 1.00 | 1.02 | 1.07 | 0.88 |
| X019923 | BCG_2415C | 269  | 8  | 5  | 5  | 1.00 | 0.79 | 0.97 | 1.01 | 1.19 | 1.26 | 0.71 |
| X019923 | BCG_2418  | 639  | 28 | 15 | 18 | 1.00 | 0.94 | 0.90 | 1.02 | 0.89 | 1.06 | 0.90 |
| X019923 | BCG_2420C | 569  | 19 | 12 | 12 | 1.00 | 1.03 | 0.97 | 0.99 | 1.13 | 0.97 | 0.75 |
| X019923 | BCG_2421  | 293  | 12 | 6  | 8  | 1.00 | 0.89 | 0.91 | 0.92 | 1.17 | 1.13 | 0.91 |
| X019923 | BCG_2423  | 63   | 2  | 2  | 2  | 1.00 | 0.94 | 0.97 | 1.35 | 1.24 | 1.07 | 1.19 |
| X019923 | BCG_2425C | 199  | 7  | 7  | 7  | 1.00 | 0.88 | 0.82 | 0.98 | 0.97 | 1.14 | 0.84 |
| X019923 | BCG_2426C | 226  | 10 | 5  | 5  | 1.00 | 0.79 | 0.75 | 0.76 | 0.81 | 1.27 | 0.68 |
| X019923 | BCG_2427C | 461  | 17 | 11 | 12 | 1.00 | 0.99 | 1.06 | 1.07 | 1.17 | 1.01 | 0.98 |
| X019923 | BCG_2428  | 355  | 28 | 8  | 17 | 1.00 | 0.88 | 0.75 | 0.86 | 0.72 | 1.14 | 0.68 |
| X019923 | BCG_2429C | 100  | 3  | 2  | 2  | 1.00 | 0.97 | 0.96 | 1.25 | 1.09 | 1.03 | 0.79 |
| X019923 | BCG_2432C | 398  | 17 | 8  | 10 | 1.00 | 0.92 | 0.78 | 1.02 | 1.05 | 1.09 | 0.91 |
| X019923 | BCG_2433C | 248  | 6  | 3  | 3  | 1.00 | 0.76 | 0.98 | 1.04 | 1.09 | 1.32 | 0.77 |
| X019923 | BCG_2434C | 114  | 5  | 3  | 5  | 1.00 | 0.84 | 0.93 | 1.03 | 1.21 | 1.19 | 0.99 |
| X019923 | BCG_2435C | 462  | 14 | 9  | 11 | 1.00 | 0.94 | 0.96 | 1.09 | 1.22 | 1.06 | 0.75 |
| X019923 | BCG_2436C | 336  | 14 | 7  | 11 | 1.00 | 0.93 | 0.81 | 0.95 | 0.79 | 1.07 | 0.81 |
| X019923 | BCG_2437C | 123  | 5  | 3  | 3  | 1.00 | 0.97 | 1.06 | 1.25 | 1.30 | 1.04 | 0.99 |
| X019923 | BCG_2439  | 354  | 14 | 8  | 8  | 1.00 | 0.88 | 0.84 | 1.12 | 0.94 | 1.14 | 0.96 |
| X019923 | BCG_2443C | 194  | 6  | 3  | 3  | 1.00 | 0.93 | 0.81 | 1.08 | 0.95 | 1.07 | 0.92 |

|         |           |      |     |    |     |      |      |      |      |      |      |      |
|---------|-----------|------|-----|----|-----|------|------|------|------|------|------|------|
| X019923 | BCG_2444C | 724  | 23  | 15 | 18  | 1.00 | 0.94 | 0.92 | 1.10 | 1.24 | 1.06 | 0.82 |
| X019923 | BCG_2447  | 846  | 47  | 13 | 35  | 1.00 | 0.91 | 0.98 | 1.09 | 1.30 | 1.09 | 0.71 |
| X019923 | BCG_2448  | 405  | 17  | 7  | 9   | 1.00 | 0.92 | 0.87 | 0.99 | 1.12 | 1.08 | 0.70 |
| X019923 | BCG_2449C | 81   | 4   | 2  | 3   | 1.00 | 0.85 | 0.91 | 1.21 | 1.20 | 1.18 | 0.80 |
| X019923 | BCG_2457C | 772  | 28  | 19 | 22  | 1.00 | 0.91 | 0.87 | 0.92 | 0.81 | 1.10 | 0.93 |
| X019923 | BCG_2459C | 346  | 11  | 7  | 7   | 1.00 | 0.94 | 0.85 | 1.02 | 1.02 | 1.06 | 0.84 |
| X019923 | BCG_2460C | 388  | 15  | 8  | 8   | 1.00 | 0.79 | 0.80 | 0.92 | 0.79 | 1.27 | 0.81 |
| X019923 | BCG_2461C | 437  | 25  | 9  | 20  | 1.00 | 0.92 | 0.80 | 0.84 | 0.78 | 1.09 | 0.71 |
| X019923 | BCG_2462C | 462  | 33  | 7  | 28  | 1.00 | 0.87 | 0.79 | 0.90 | 0.80 | 1.15 | 0.76 |
| X019923 | BCG_2464C | 1958 | 75  | 35 | 50  | 1.00 | 0.76 | 0.73 | 0.70 | 0.59 | 1.31 | 0.81 |
| X019923 | BCG_2465C | 386  | 9   | 7  | 8   | 1.00 | 0.85 | 0.92 | 1.05 | 1.20 | 1.17 | 0.64 |
| X019923 | BCG_2467C | 240  | 12  | 5  | 6   | 1.00 | 0.87 | 0.91 | 1.04 | 1.19 | 1.15 | 0.86 |
| X019923 | BCG_2468C | 574  | 25  | 13 | 15  | 1.00 | 1.04 | 0.99 | 0.99 | 1.25 | 0.96 | 1.09 |
| X019923 | BCG_2469C | 418  | 14  | 10 | 11  | 1.00 | 0.91 | 0.85 | 0.94 | 1.02 | 1.10 | 0.82 |
| X019923 | BCG_2473C | 398  | 8   | 7  | 7   | 1.00 | 1.01 | 1.04 | 1.13 | 1.37 | 0.99 | 0.80 |
| X019923 | BCG_2474C | 796  | 21  | 14 | 17  | 1.00 | 0.89 | 0.84 | 1.00 | 1.05 | 1.13 | 0.83 |
| X019923 | BCG_2475C | 712  | 20  | 12 | 13  | 1.00 | 0.95 | 0.90 | 1.04 | 1.16 | 1.05 | 0.86 |
| X019923 | BCG_2477C | 920  | 30  | 17 | 22  | 1.00 | 0.90 | 0.84 | 0.94 | 1.01 | 1.11 | 0.84 |
| X019923 | BCG_2480C | 331  | 21  | 8  | 12  | 1.00 | 0.80 | 0.85 | 1.07 | 1.12 | 1.26 | 0.63 |
| X019923 | BCG_2481C | 518  | 18  | 6  | 13  | 1.00 | 0.87 | 0.96 | 1.05 | 1.10 | 1.15 | 0.75 |
| X019923 | BCG_2482C | 952  | 45  | 16 | 26  | 1.00 | 0.85 | 0.86 | 1.03 | 1.12 | 1.18 | 0.70 |
| X019923 | BCG_2485C | 469  | 19  | 8  | 15  | 1.00 | 0.89 | 0.88 | 1.05 | 1.20 | 1.12 | 0.67 |
| X019923 | BCG_2486C | 149  | 6   | 4  | 5   | 1.00 | 0.95 | 0.98 | 1.09 | 1.32 | 1.05 | 0.78 |
| X019923 | BCG_2487  | 1083 | 32  | 21 | 23  | 1.00 | 0.95 | 0.94 | 0.98 | 1.10 | 1.06 | 0.84 |
| X019923 | BCG_2488C | 234  | 7   | 4  | 5   | 1.00 | 0.52 | 0.84 | 0.92 | 0.78 | 1.93 | 0.62 |
| X019923 | BCG_2493  | 92   | 3   | 2  | 2   | 1.00 | 0.96 | 0.88 | 0.97 | 1.54 | 1.05 | 1.21 |
| X019923 | BCG_2494C | 131  | 4   | 3  | 4   | 1.00 | 0.88 | 0.89 | 0.95 | 1.13 | 1.13 | 0.77 |
| X019923 | BCG_2495C | 392  | 9   | 5  | 6   | 1.00 | 0.89 | 0.87 | 1.07 | 1.26 | 1.12 | 0.82 |
| X019923 | BCG_2496C | 4365 | 152 | 80 | 104 | 1.00 | 0.79 | 0.72 | 0.67 | 0.65 | 1.26 | 0.92 |
| X019923 | BCG_2497C | 1061 | 41  | 20 | 27  | 1.00 | 0.92 | 0.97 | 1.12 | 1.28 | 1.08 | 0.75 |
| X019923 | BCG_2500C | 759  | 30  | 14 | 18  | 1.00 | 0.95 | 0.82 | 0.98 | 0.85 | 1.06 | 0.84 |
| X019923 | BCG_2501C | 462  | 18  | 10 | 10  | 1.00 | 0.98 | 0.84 | 0.94 | 1.29 | 1.02 | 0.69 |
| X019923 | BCG_2502C | 174  | 8   | 4  | 4   | 1.00 | 0.96 | 0.96 | 1.21 | 1.50 | 1.04 | 0.95 |
| X019923 | BCG_2504  | 216  | 10  | 4  | 4   | 1.00 | 0.78 | 1.07 | 1.06 | 1.23 | 1.28 | 0.70 |
| X019923 | BCG_2515C | 1038 | 39  | 20 | 31  | 1.00 | 0.83 | 0.80 | 0.85 | 0.79 | 1.21 | 0.83 |
| X019923 | BCG_2516C | 493  | 20  | 9  | 12  | 1.00 | 0.93 | 0.94 | 1.06 | 1.13 | 1.07 | 0.89 |
| X019923 | BCG_2517C | 388  | 18  | 9  | 12  | 1.00 | 0.84 | 0.90 | 0.92 | 1.00 | 1.20 | 0.81 |
| X019923 | BCG_2518C | 427  | 12  | 7  | 8   | 1.00 | 0.88 | 0.95 | 1.07 | 1.21 | 1.13 | 0.77 |
| X019923 | BCG_2519C | 103  | 5   | 3  | 3   | 1.00 | 0.82 | 0.89 | 1.00 | 0.97 | 1.22 | 0.70 |

|         |           |      |     |     |     |      |      |      |      |      |      |      |
|---------|-----------|------|-----|-----|-----|------|------|------|------|------|------|------|
| X019923 | BCG_2520C | 1018 | 32  | 14  | 20  | 1.00 | 0.83 | 0.75 | 0.91 | 0.88 | 1.20 | 3.06 |
| X019923 | BCG_2521C | 3897 | 296 | 60  | 204 | 1.00 | 0.74 | 0.84 | 0.86 | 0.74 | 1.35 | 0.68 |
| X019923 | BCG_2522C | 2498 | 222 | 29  | 133 | 1.00 | 0.72 | 0.87 | 0.90 | 0.87 | 1.38 | 0.69 |
| X019923 | BCG_2524C | 140  | 3   | 2   | 2   | 1.00 | 1.29 | 1.18 | 1.36 | 1.53 | 0.78 | 0.98 |
| X019923 | BCG_2526  | 128  | 8   | 2   | 2   | 1.00 | 1.04 | 1.35 | 1.34 | 1.11 | 0.97 | 0.83 |
| X019923 | BCG_2528C | 65   | 8   | 2   | 2   | 1.00 | 0.84 | 0.72 | 1.00 | 0.93 | 1.19 | 0.85 |
| X019923 | BCG_2529  | 517  | 13  | 7   | 10  | 1.00 | 0.85 | 0.94 | 1.03 | 1.16 | 1.18 | 0.82 |
| X019923 | BCG_2530C | 212  | 7   | 6   | 6   | 1.00 | 0.94 | 1.08 | 1.20 | 1.46 | 1.06 | 0.86 |
| X019923 | BCG_2531  | 205  | 6   | 5   | 5   | 1.00 | 1.00 | 0.95 | 1.16 | 1.35 | 1.00 | 0.74 |
| X019923 | BCG_2536C | 113  | 4   | 3   | 3   | 1.00 | 0.85 | 0.76 | 1.44 | 0.74 | 1.18 | 0.79 |
| X019923 | BCG_2537C | 122  | 4   | 4   | 4   | 1.00 | 0.86 | 0.89 | 0.90 | 0.84 | 1.16 | 0.62 |
| X019923 | BCG_2539C | 202  | 11  | 4   | 5   | 1.00 | 0.89 | 0.84 | 1.12 | 0.88 | 1.13 | 1.01 |
| X019923 | BCG_2541C | 270  | 18  | 7   | 11  | 1.00 | 0.90 | 0.92 | 0.95 | 0.87 | 1.12 | 0.76 |
| X019923 | BCG_2542  | 472  | 17  | 9   | 11  | 1.00 | 0.94 | 0.95 | 1.11 | 1.26 | 1.06 | 0.85 |
| X019923 | BCG_2543C | 135  | 6   | 3   | 3   | 1.00 | 1.01 | 0.88 | 1.08 | 1.14 | 0.99 | 0.98 |
| X019923 | BCG_2545C | 7114 | 313 | 127 | 226 | 1.00 | 0.84 | 0.76 | 0.90 | 0.82 | 1.20 | 0.90 |
| X019923 | BCG_2548  | 72   | 3   | 2   | 3   | 1.00 | 0.87 | 0.94 | 0.94 | 1.16 | 1.15 | 0.64 |
| X019923 | BCG_2549C | 494  | 17  | 12  | 13  | 1.00 | 0.88 | 0.89 | 1.11 | 1.13 | 1.13 | 0.84 |
| X019923 | BCG_2550  | 576  | 15  | 12  | 12  | 1.00 | 0.91 | 0.91 | 1.06 | 1.12 | 1.10 | 0.86 |
| X019923 | BCG_2553C | 457  | 15  | 10  | 10  | 1.00 | 0.88 | 0.87 | 0.92 | 0.95 | 1.13 | 1.05 |
| X019923 | BCG_2554C | 103  | 3   | 2   | 2   | 1.00 | 0.87 | 0.87 | 1.12 | 1.06 | 1.15 | 0.97 |
| X019923 | BCG_2555C | 304  | 9   | 8   | 9   | 1.00 | 0.87 | 0.94 | 1.11 | 1.23 | 1.15 | 0.68 |
| X019923 | BCG_2556C | 404  | 18  | 10  | 14  | 1.00 | 0.88 | 0.91 | 1.02 | 1.17 | 1.13 | 0.66 |
| X019923 | BCG_2557C | 886  | 22  | 12  | 15  | 1.00 | 0.91 | 0.96 | 1.21 | 1.28 | 1.09 | 0.72 |
| X019923 | BCG_2558  | 215  | 6   | 6   | 6   | 1.00 | 0.92 | 0.90 | 1.04 | 1.08 | 1.09 | 0.92 |
| X019923 | BCG_2559C | 130  | 5   | 3   | 4   | 1.00 | 0.76 | 0.82 | 1.00 | 0.93 | 1.32 | 0.80 |
| X019923 | BCG_2560C | 194  | 6   | 4   | 5   | 1.00 | 0.96 | 0.99 | 1.07 | 1.18 | 1.04 | 0.80 |
| X019923 | BCG_2562C | 340  | 14  | 6   | 7   | 1.00 | 0.88 | 0.87 | 1.03 | 1.29 | 1.14 | 0.79 |
| X019923 | BCG_2576C | 994  | 34  | 19  | 26  | 1.00 | 0.86 | 0.77 | 0.78 | 0.76 | 1.16 | 0.82 |
| X019923 | BCG_2577C | 136  | 6   | 3   | 3   | 1.00 | 1.17 | 0.87 | 0.88 | 1.24 | 0.85 | 0.85 |
| X019923 | BCG_2578C | 1871 | 66  | 35  | 47  | 1.00 | 0.99 | 0.91 | 0.85 | 0.86 | 1.01 | 1.04 |
| X019923 | BCG_2579C | 87   | 2   | 2   | 2   | 1.00 | 0.94 | 0.98 | 1.08 | 1.35 | 1.06 | 0.79 |
| X019923 | BCG_2582C | 132  | 4   | 2   | 2   | 1.00 | 1.08 | 1.00 | 1.07 | 1.12 | 0.93 | 0.73 |
| X019923 | BCG_2583  | 72   | 3   | 2   | 3   | 1.00 | 0.95 | 0.93 | 1.01 | 1.15 | 1.06 | 1.17 |
| X019923 | BCG_2584  | 108  | 4   | 2   | 2   | 1.00 | 0.90 | 0.91 | 0.94 | 0.90 | 1.11 | 0.89 |
| X019923 | BCG_2585  | 855  | 33  | 12  | 21  | 1.00 | 0.92 | 0.84 | 0.96 | 0.99 | 1.09 | 0.88 |
| X019923 | BCG_2586  | 474  | 14  | 8   | 9   | 1.00 | 0.88 | 0.96 | 0.99 | 1.10 | 1.14 | 0.82 |
| X019923 | BCG_2587  | 382  | 12  | 7   | 7   | 1.00 | 0.89 | 0.86 | 1.02 | 1.15 | 1.12 | 0.81 |
| X019923 | BCG_2590  | 365  | 18  | 10  | 10  | 1.00 | 0.99 | 0.85 | 0.81 | 0.98 | 1.01 | 0.86 |



|         |           |     |    |    |    |      |      |      |      |      |      |      |
|---------|-----------|-----|----|----|----|------|------|------|------|------|------|------|
| X019923 | BCG_2591C | 71  | 5  | 2  | 2  | 1.00 | 2.51 | 1.04 | 1.51 | 1.46 | 0.40 | 1.02 |
| X019923 | BCG_2592C | 298 | 11 | 7  | 7  | 1.00 | 1.07 | 0.91 | 1.13 | 1.23 | 0.94 | 0.79 |
| X019923 | BCG_2594C | 266 | 6  | 4  | 4  | 1.00 | 0.94 | 1.00 | 1.03 | 0.91 | 1.07 | 0.97 |
| X019923 | BCG_2595C | 494 | 20 | 12 | 13 | 1.00 | 0.93 | 0.88 | 1.01 | 1.12 | 1.07 | 0.85 |
| X019923 | BCG_2596  | 82  | 2  | 2  | 2  | 1.00 | 1.00 | 1.05 | 1.27 | 1.21 | 1.01 | 0.63 |
| X019923 | BCG_2597  | 512 | 14 | 8  | 8  | 1.00 | 0.86 | 0.83 | 0.91 | 0.96 | 1.16 | 0.84 |
| X019923 | BCG_2598  | 118 | 5  | 2  | 2  | 1.00 | 0.99 | 1.07 | 1.30 | 1.27 | 1.01 | 1.08 |
| X019923 | BCG_2602  | 582 | 25 | 13 | 19 | 1.00 | 0.92 | 0.96 | 1.21 | 1.25 | 1.08 | 0.84 |
| X019923 | BCG_2603C | 431 | 14 | 11 | 11 | 1.00 | 0.92 | 0.96 | 1.17 | 1.37 | 1.08 | 0.81 |
| X019923 | BCG_2604C | 239 | 11 | 6  | 6  | 1.00 | 0.93 | 1.00 | 1.06 | 1.09 | 1.08 | 0.85 |
| X019923 | BCG_2605  | 308 | 15 | 4  | 11 | 1.00 | 0.92 | 0.78 | 0.77 | 0.76 | 1.08 | 0.93 |
| X019923 | BCG_2606C | 466 | 19 | 11 | 11 | 1.00 | 0.86 | 0.85 | 1.14 | 1.02 | 1.17 | 0.88 |
| X019923 | BCG_2607C | 947 | 27 | 16 | 21 | 1.00 | 0.91 | 0.88 | 0.91 | 0.93 | 1.10 | 0.71 |
| X019923 | BCG_2608C | 362 | 10 | 6  | 7  | 1.00 | 0.92 | 0.90 | 1.18 | 1.12 | 1.09 | 0.95 |
| X019923 | BCG_2609C | 791 | 20 | 12 | 14 | 1.00 | 0.88 | 0.81 | 0.90 | 0.89 | 1.14 | 0.85 |
| X019923 | BCG_2610C | 592 | 26 | 13 | 15 | 1.00 | 0.89 | 0.80 | 0.84 | 0.82 | 1.13 | 0.85 |
| X019923 | BCG_2611C | 150 | 5  | 3  | 4  | 1.00 | 0.84 | 0.85 | 0.96 | 1.10 | 1.19 | 1.08 |
| X019923 | BCG_2612  | 459 | 13 | 9  | 10 | 1.00 | 0.74 | 0.77 | 0.82 | 0.96 | 1.35 | 0.84 |
| X019923 | BCG_2613  | 240 | 18 | 8  | 8  | 1.00 | 0.74 | 0.79 | 0.78 | 0.92 | 1.35 | 0.92 |
| X019923 | BCG_2615C | 209 | 9  | 5  | 6  | 1.00 | 0.87 | 1.00 | 1.21 | 1.24 | 1.15 | 0.78 |
| X019923 | BCG_2616C | 435 | 23 | 8  | 14 | 1.00 | 0.86 | 0.88 | 1.00 | 1.08 | 1.16 | 0.76 |
| X019923 | BCG_2617C | 164 | 9  | 5  | 5  | 1.00 | 0.87 | 0.84 | 0.90 | 0.72 | 1.15 | 0.82 |
| X019923 | BCG_2620  | 213 | 7  | 3  | 3  | 1.00 | 0.72 | 0.39 | 0.92 | 1.01 | 1.39 | 0.69 |
| X019923 | BCG_2628C | 336 | 18 | 7  | 10 | 1.00 | 0.92 | 0.90 | 1.06 | 1.24 | 1.09 | 0.72 |
| X019923 | BCG_2629C | 141 | 7  | 3  | 3  | 1.00 | 0.78 | 0.87 | 1.09 | 1.08 | 1.28 | 0.78 |
| X019923 | BCG_2630C | 328 | 12 | 6  | 7  | 1.00 | 0.95 | 0.98 | 1.12 | 1.25 | 1.05 | 1.02 |
| X019923 | BCG_2631C | 967 | 43 | 16 | 33 | 1.00 | 0.91 | 0.86 | 0.92 | 0.90 | 1.10 | 0.80 |
| X019923 | BCG_2632  | 252 | 6  | 5  | 5  | 1.00 | 0.90 | 0.92 | 1.23 | 1.37 | 1.11 | 0.73 |
| X019923 | BCG_2634C | 340 | 9  | 6  | 6  | 1.00 | 0.94 | 0.92 | 1.18 | 1.14 | 1.06 | 1.04 |
| X019923 | BCG_2635C | 185 | 5  | 4  | 4  | 1.00 | 0.96 | 0.91 | 1.03 | 1.04 | 1.04 | 0.85 |
| X019923 | BCG_2636C | 202 | 7  | 4  | 4  | 1.00 | 0.86 | 0.79 | 1.01 | 1.17 | 1.16 | 0.81 |
| X019923 | BCG_2637C | 91  | 7  | 2  | 2  | 1.00 | 0.81 | 0.81 | 0.88 | 1.07 | 1.24 | 0.96 |
| X019923 | BCG_2639C | 754 | 27 | 18 | 20 | 1.00 | 0.92 | 0.96 | 0.96 | 1.05 | 1.08 | 0.79 |
| X019923 | BCG_2643  | 116 | 3  | 2  | 2  | 1.00 | 0.77 | 0.98 | 0.96 | 1.25 | 1.31 | 1.05 |
| X019923 | BCG_2646C | 240 | 15 | 4  | 14 | 1.00 | 0.86 | 0.83 | 0.97 | 0.99 | 1.16 | 0.59 |
| X019923 | BCG_2649  | 837 | 48 | 12 | 29 | 1.00 | 0.91 | 0.88 | 0.95 | 0.96 | 1.10 | 0.80 |
| X019923 | BCG_2650  | 533 | 18 | 9  | 13 | 1.00 | 0.84 | 0.95 | 1.07 | 1.14 | 1.19 | 0.71 |
| X019923 | BCG_2651C | 276 | 8  | 6  | 6  | 1.00 | 0.88 | 0.99 | 1.16 | 1.18 | 1.13 | 0.82 |
| X019923 | BCG_2652C | 258 | 7  | 6  | 6  | 1.00 | 0.78 | 0.90 | 0.97 | 1.16 | 1.28 | 0.84 |

|         |           |      |     |    |    |      |      |      |      |      |      |      |
|---------|-----------|------|-----|----|----|------|------|------|------|------|------|------|
| X019923 | BCG_2653C | 257  | 4   | 2  | 2  | 1.00 | 0.86 | 0.82 | 1.00 | 1.12 | 1.17 | 0.60 |
| X019923 | BCG_2654C | 390  | 10  | 8  | 8  | 1.00 | 0.89 | 0.92 | 1.01 | 0.96 | 1.12 | 0.88 |
| X019923 | BCG_2656  | 376  | 13  | 9  | 11 | 1.00 | 0.97 | 1.08 | 1.21 | 1.40 | 1.03 | 0.86 |
| X019923 | BCG_2658  | 315  | 12  | 7  | 7  | 1.00 | 0.89 | 0.97 | 1.21 | 1.12 | 1.12 | 0.85 |
| X019923 | BCG_2659C | 188  | 4   | 3  | 4  | 1.00 | 0.82 | 0.80 | 0.93 | 1.11 | 1.22 | 0.60 |
| X019923 | BCG_2663  | 76   | 4   | 2  | 2  | 1.00 | 0.93 | 0.80 | 1.32 | 1.36 | 1.08 | 0.90 |
| X019923 | BCG_2664  | 122  | 4   | 3  | 3  | 1.00 | 0.66 | 0.60 | 0.66 | 0.75 | 1.53 | 0.61 |
| X019923 | BCG_2668  | 210  | 6   | 5  | 6  | 1.00 | 0.82 | 0.88 | 1.07 | 1.05 | 1.22 | 0.69 |
| X019923 | BCG_2683C | 61   | 2   | 2  | 2  | 1.00 | 1.03 | 1.07 | 1.17 | 1.41 | 0.98 | 0.79 |
| X019923 | BCG_2684  | 1329 | 184 | 15 | 92 | 1.00 | 0.43 | 0.82 | 0.74 | 0.77 | 2.31 | 0.71 |
| X019923 | BCG_2685  | 409  | 14  | 9  | 11 | 1.00 | 0.87 | 0.81 | 0.88 | 0.78 | 1.15 | 0.85 |
| X019923 | BCG_2686  | 147  | 5   | 3  | 3  | 1.00 | 0.93 | 0.82 | 0.95 | 0.90 | 1.07 | 1.01 |
| X019923 | BCG_2687  | 178  | 4   | 4  | 4  | 1.00 | 0.92 | 1.07 | 1.34 | 1.24 | 1.08 | 0.86 |
| X019923 | BCG_2688C | 114  | 5   | 3  | 3  | 1.00 | 0.98 | 0.91 | 1.09 | 1.13 | 1.02 | 0.80 |
| X019923 | BCG_2689C | 498  | 20  | 10 | 15 | 1.00 | 0.92 | 0.97 | 1.07 | 1.27 | 1.08 | 0.83 |
| X019923 | BCG_2690C | 300  | 9   | 6  | 6  | 1.00 | 0.83 | 1.02 | 1.12 | 1.25 | 1.21 | 0.73 |
| X019923 | BCG_2691C | 121  | 5   | 3  | 3  | 1.00 | 0.94 | 0.92 | 1.39 | 1.38 | 1.06 | 0.85 |
| X019923 | BCG_2692  | 331  | 12  | 6  | 9  | 1.00 | 0.99 | 0.91 | 1.04 | 1.23 | 1.01 | 0.76 |
| X019923 | BCG_2693  | 132  | 5   | 3  | 3  | 1.00 | 1.13 | 1.00 | 1.15 | 1.29 | 0.88 | 0.81 |
| X019923 | BCG_2694  | 152  | 6   | 4  | 4  | 1.00 | 0.76 | 0.79 | 1.04 | 0.90 | 1.32 | 0.64 |
| X019923 | BCG_2695C | 300  | 8   | 7  | 8  | 1.00 | 1.06 | 1.07 | 1.26 | 1.26 | 0.94 | 1.09 |
| X019923 | BCG_2696  | 277  | 9   | 6  | 7  | 1.00 | 0.93 | 0.85 | 1.03 | 1.17 | 1.08 | 0.66 |
| X019923 | BCG_2697  | 136  | 6   | 4  | 5  | 1.00 | 0.70 | 0.78 | 0.83 | 0.74 | 1.43 | 0.96 |
| X019923 | BCG_2701C | 787  | 28  | 11 | 18 | 1.00 | 0.77 | 0.75 | 0.76 | 0.82 | 1.30 | 7.49 |
| X019923 | BCG_2702C | 447  | 13  | 9  | 12 | 1.00 | 0.92 | 0.84 | 0.94 | 0.87 | 1.09 | 0.81 |
| X019923 | BCG_2703C | 352  | 7   | 5  | 5  | 1.00 | 0.93 | 0.76 | 0.87 | 0.96 | 1.07 | 0.96 |
| X019923 | BCG_2704  | 687  | 20  | 14 | 15 | 1.00 | 0.92 | 0.88 | 1.00 | 1.03 | 1.09 | 0.79 |
| X019923 | BCG_2705  | 310  | 11  | 5  | 7  | 1.00 | 0.84 | 0.85 | 0.99 | 0.94 | 1.19 | 0.89 |
| X019923 | BCG_2707C | 227  | 7   | 4  | 5  | 1.00 | 0.90 | 0.87 | 1.00 | 1.16 | 1.11 | 0.74 |
| X019923 | BCG_2709C | 392  | 12  | 8  | 9  | 1.00 | 0.92 | 0.92 | 1.07 | 1.32 | 1.09 | 0.67 |
| X019923 | BCG_2710C | 162  | 5   | 3  | 5  | 1.00 | 0.93 | 1.01 | 1.11 | 1.24 | 1.08 | 0.66 |
| X019923 | BCG_2711  | 131  | 5   | 3  | 3  | 1.00 | 0.85 | 0.91 | 1.06 | 1.19 | 1.18 | 0.92 |
| X019923 | BCG_2712C | 259  | 10  | 4  | 6  | 1.00 | 0.97 | 0.89 | 1.01 | 1.08 | 1.03 | 0.50 |
| X019923 | BCG_2713  | 171  | 7   | 4  | 6  | 1.00 | 0.75 | 0.79 | 0.80 | 0.86 | 1.34 | 0.75 |
| X019923 | BCG_2714C | 269  | 7   | 5  | 5  | 1.00 | 0.81 | 0.77 | 0.96 | 0.95 | 1.23 | 0.72 |
| X019923 | BCG_2715  | 389  | 16  | 7  | 9  | 1.00 | 0.81 | 0.86 | 0.90 | 0.93 | 1.23 | 0.83 |
| X019923 | BCG_2716  | 1181 | 47  | 20 | 28 | 1.00 | 0.95 | 0.90 | 0.95 | 1.04 | 1.05 | 0.80 |
| X019923 | BCG_2717  | 86   | 3   | 2  | 2  | 1.00 | 0.97 | 0.96 | 1.15 | 1.53 | 1.03 | 0.97 |
| X019923 | BCG_2723  | 542  | 12  | 9  | 9  | 1.00 | 0.89 | 0.85 | 1.00 | 1.18 | 1.13 | 0.78 |

|         |           |      |     |    |     |      |      |      |      |      |      |      |
|---------|-----------|------|-----|----|-----|------|------|------|------|------|------|------|
| X019923 | BCG_2724  | 647  | 23  | 11 | 20  | 1.00 | 0.85 | 0.87 | 1.06 | 1.15 | 1.18 | 0.66 |
| X019923 | BCG_2726  | 403  | 11  | 8  | 8   | 1.00 | 0.93 | 1.02 | 1.16 | 1.13 | 1.08 | 0.95 |
| X019923 | BCG_2727  | 356  | 11  | 7  | 8   | 1.00 | 0.83 | 0.84 | 0.88 | 1.40 | 1.20 | 0.90 |
| X019923 | BCG_2728  | 269  | 10  | 7  | 7   | 1.00 | 0.84 | 0.97 | 1.07 | 1.39 | 1.20 | 0.86 |
| X019923 | BCG_2729  | 107  | 3   | 2  | 2   | 1.00 | 0.82 | 0.73 | 1.13 | 1.11 | 1.22 | 0.67 |
| X019923 | BCG_2731C | 410  | 20  | 9  | 12  | 1.00 | 0.97 | 0.85 | 1.00 | 0.85 | 1.03 | 0.81 |
| X019923 | BCG_2734C | 997  | 27  | 15 | 21  | 1.00 | 0.92 | 0.78 | 0.71 | 0.68 | 1.09 | 0.93 |
| X019923 | BCG_2736  | 51   | 5   | 2  | 2   | 1.00 | 1.01 | 0.77 | 0.96 | 0.79 | 0.99 | 0.94 |
| X019923 | BCG_2737C | 56   | 4   | 2  | 2   | 1.00 | 1.03 | 0.74 | 0.93 | 0.75 | 0.97 | 0.75 |
| X019923 | BCG_2739C | 282  | 9   | 5  | 5   | 1.00 | 0.86 | 0.96 | 0.99 | 1.17 | 1.16 | 0.74 |
| X019923 | BCG_2740C | 287  | 10  | 5  | 5   | 1.00 | 0.95 | 1.00 | 1.16 | 1.39 | 1.05 | 1.07 |
| X019923 | BCG_2744  | 1007 | 36  | 20 | 21  | 1.00 | 0.90 | 0.85 | 0.96 | 0.93 | 1.12 | 0.86 |
| X019923 | BCG_2745C | 257  | 7   | 6  | 6   | 1.00 | 0.87 | 0.94 | 1.04 | 1.11 | 1.15 | 0.99 |
| X019923 | BCG_2750C | 821  | 32  | 16 | 20  | 1.00 | 0.86 | 0.86 | 0.96 | 0.93 | 1.17 | 0.84 |
| X019923 | BCG_2753C | 135  | 6   | 3  | 3   | 1.00 | 0.92 | 1.02 | 1.28 | 1.07 | 1.09 | 0.99 |
| X019923 | BCG_2754  | 334  | 13  | 6  | 9   | 1.00 | 0.89 | 0.96 | 1.12 | 1.33 | 1.13 | 0.86 |
| X019923 | BCG_2759C | 388  | 12  | 8  | 8   | 1.00 | 0.81 | 0.72 | 0.86 | 0.76 | 1.24 | 0.96 |
| X019923 | BCG_2760C | 1747 | 126 | 24 | 90  | 1.00 | 0.85 | 0.76 | 0.86 | 0.74 | 1.17 | 0.76 |
| X019923 | BCG_2764C | 321  | 14  | 7  | 7   | 1.00 | 0.71 | 0.61 | 0.80 | 0.76 | 1.41 | 0.85 |
| X019923 | BCG_2767  | 562  | 20  | 12 | 14  | 1.00 | 0.87 | 0.79 | 0.89 | 0.91 | 1.16 | 0.87 |
| X019923 | BCG_2768C | 665  | 24  | 16 | 18  | 1.00 | 0.85 | 0.96 | 0.92 | 0.76 | 1.17 | 0.70 |
| X019923 | BCG_2769C | 414  | 15  | 7  | 9   | 1.00 | 0.99 | 0.93 | 1.20 | 1.26 | 1.01 | 0.80 |
| X019923 | BCG_2770C | 400  | 16  | 10 | 12  | 1.00 | 0.87 | 0.93 | 1.14 | 1.08 | 1.15 | 0.68 |
| X019923 | BCG_2780C | 933  | 306 | 13 | 182 | 1.00 | 0.28 | 0.85 | 0.94 | 0.95 | 3.56 | 0.86 |
| X019923 | BCG_2781C | 219  | 8   | 4  | 6   | 1.00 | 0.92 | 0.90 | 1.03 | 1.13 | 1.09 | 0.70 |
| X019923 | BCG_2782  | 622  | 23  | 11 | 15  | 1.00 | 0.88 | 0.79 | 0.85 | 0.79 | 1.14 | 0.79 |
| X019923 | BCG_2783C | 428  | 15  | 7  | 11  | 1.00 | 0.91 | 0.94 | 1.21 | 1.15 | 1.10 | 1.00 |
| X019923 | BCG_2789C | 143  | 4   | 3  | 3   | 1.00 | 0.86 | 0.97 | 1.15 | 0.90 | 1.16 | 0.91 |
| X019923 | BCG_2790C | 299  | 15  | 8  | 11  | 1.00 | 1.07 | 1.16 | 1.26 | 1.37 | 0.94 | 0.88 |
| X019923 | BCG_2792  | 36   | 2   | 2  | 2   | 1.00 | 2.57 | 2.11 | 2.69 | 5.60 | 0.39 | 2.40 |
| X019923 | BCG_2795C | 417  | 20  | 8  | 10  | 1.00 | 0.81 | 0.84 | 0.94 | 0.92 | 1.23 | 0.75 |
| X019923 | BCG_2799C | 137  | 5   | 3  | 3   | 1.00 | 0.94 | 0.90 | 1.14 | 1.16 | 1.07 | 0.81 |
| X019923 | BCG_2800C | 819  | 23  | 14 | 18  | 1.00 | 0.95 | 0.92 | 1.00 | 1.02 | 1.05 | 0.83 |
| X019923 | BCG_2801C | 2591 | 203 | 42 | 139 | 1.00 | 0.90 | 0.76 | 0.74 | 0.62 | 1.11 | 0.75 |
| X019923 | BCG_2803C | 310  | 24  | 6  | 16  | 1.00 | 0.83 | 0.77 | 0.86 | 0.71 | 1.20 | 0.71 |
| X019923 | BCG_2804C | 111  | 5   | 3  | 4   | 1.00 | 0.95 | 0.75 | 0.88 | 1.17 | 1.06 | 0.92 |
| X019923 | BCG_2806  | 258  | 13  | 6  | 8   | 1.00 | 0.93 | 0.91 | 1.07 | 1.17 | 1.08 | 0.79 |
| X019923 | BCG_2807C | 454  | 18  | 10 | 10  | 1.00 | 0.83 | 0.89 | 1.06 | 1.09 | 1.20 | 0.82 |
| X019923 | BCG_2808C | 356  | 14  | 9  | 12  | 1.00 | 0.98 | 1.00 | 1.10 | 1.33 | 1.02 | 0.84 |

|         |           |      |     |    |     |      |      |      |      |      |      |      |
|---------|-----------|------|-----|----|-----|------|------|------|------|------|------|------|
| X019923 | BCG_2809C | 97   | 7   | 3  | 3   | 1.00 | 0.84 | 0.82 | 0.93 | 0.83 | 1.19 | 0.84 |
| X019923 | BCG_2811C | 688  | 23  | 13 | 18  | 1.00 | 1.04 | 0.88 | 0.89 | 0.87 | 0.96 | 0.81 |
| X019923 | BCG_2812C | 211  | 7   | 4  | 4   | 1.00 | 0.91 | 0.95 | 1.06 | 1.12 | 1.10 | 0.75 |
| X019923 | BCG_2813C | 435  | 23  | 9  | 12  | 1.00 | 0.87 | 0.83 | 0.81 | 0.89 | 1.15 | 2.88 |
| X019923 | BCG_2820C | 459  | 11  | 8  | 8   | 1.00 | 0.98 | 0.83 | 0.92 | 0.98 | 1.03 | 0.84 |
| X019923 | BCG_2840C | 364  | 11  | 7  | 7   | 1.00 | 0.84 | 0.80 | 0.89 | 0.95 | 1.19 | 0.82 |
| X019923 | BCG_2842C | 226  | 13  | 6  | 6   | 1.00 | 1.00 | 0.89 | 1.02 | 0.92 | 1.00 | 0.79 |
| X019923 | BCG_2843C | 263  | 10  | 8  | 8   | 1.00 | 0.94 | 0.93 | 1.06 | 1.03 | 1.07 | 0.98 |
| X019923 | BCG_2845C | 122  | 5   | 4  | 4   | 1.00 | 0.94 | 0.91 | 1.36 | 1.17 | 1.07 | 0.84 |
| X019923 | BCG_2851  | 670  | 21  | 12 | 18  | 1.00 | 0.96 | 0.93 | 1.02 | 1.22 | 1.04 | 0.92 |
| X019923 | BCG_2857C | 711  | 13  | 9  | 9   | 1.00 | 0.84 | 0.84 | 1.02 | 1.21 | 1.19 | 0.73 |
| X019923 | BCG_2858C | 156  | 8   | 4  | 5   | 1.00 | 0.79 | 0.89 | 0.98 | 1.03 | 1.26 | 0.69 |
| X019923 | BCG_2859C | 1984 | 66  | 33 | 45  | 1.00 | 0.86 | 0.74 | 0.65 | 0.89 | 1.17 | 0.71 |
| X019923 | BCG_2861C | 483  | 19  | 12 | 13  | 1.00 | 0.82 | 0.93 | 1.11 | 1.19 | 1.21 | 0.71 |
| X019923 | BCG_2862C | 812  | 25  | 13 | 17  | 1.00 | 0.90 | 0.77 | 0.84 | 0.86 | 1.11 | 0.74 |
| X019923 | BCG_2863  | 110  | 4   | 3  | 3   | 1.00 | 0.87 | 0.96 | 1.00 | 1.17 | 1.14 | 0.73 |
| X019923 | BCG_2864  | 60   | 2   | 2  | 2   | 1.00 | 0.70 | 0.79 | 1.28 | 1.12 | 1.43 | 0.77 |
| X019923 | BCG_2865C | 838  | 28  | 16 | 16  | 1.00 | 0.90 | 0.98 | 1.13 | 1.22 | 1.11 | 0.90 |
| X019923 | BCG_2867C | 197  | 7   | 5  | 5   | 1.00 | 1.06 | 0.99 | 1.18 | 1.40 | 0.95 | 0.89 |
| X019923 | BCG_2868C | 134  | 6   | 4  | 4   | 1.00 | 0.89 | 0.75 | 0.86 | 1.07 | 1.12 | 1.02 |
| X019923 | BCG_2871C | 110  | 3   | 2  | 2   | 1.00 | 0.94 | 1.37 | 1.80 | 1.39 | 1.06 | 1.23 |
| X019923 | BCG_2872C | 318  | 12  | 7  | 8   | 1.00 | 0.94 | 0.80 | 0.89 | 0.93 | 1.06 | 0.71 |
| X019923 | BCG_2875  | 611  | 23  | 15 | 17  | 1.00 | 0.90 | 0.89 | 1.04 | 1.12 | 1.11 | 0.81 |
| X019923 | BCG_2879C | 140  | 4   | 3  | 3   | 1.00 | 0.89 | 0.89 | 1.11 | 1.25 | 1.12 | 0.80 |
| X019923 | BCG_2880C | 475  | 13  | 9  | 9   | 1.00 | 0.97 | 0.97 | 1.17 | 1.15 | 1.03 | 0.88 |
| X019923 | BCG_2881C | 277  | 9   | 6  | 6   | 1.00 | 0.93 | 0.95 | 1.17 | 1.34 | 1.08 | 0.82 |
| X019923 | BCG_2882C | 1867 | 245 | 25 | 153 | 1.00 | 0.85 | 0.77 | 0.81 | 0.76 | 1.18 | 0.72 |
| X019923 | BCG_2883C | 278  | 10  | 6  | 8   | 1.00 | 0.90 | 0.94 | 1.11 | 1.29 | 1.11 | 0.70 |
| X019923 | BCG_2890C | 927  | 29  | 14 | 20  | 1.00 | 0.86 | 0.93 | 1.07 | 1.21 | 1.17 | 0.73 |
| X019923 | BCG_2891C | 536  | 13  | 9  | 10  | 1.00 | 0.87 | 0.83 | 0.93 | 1.04 | 1.14 | 0.96 |
| X019923 | BCG_2892C | 127  | 4   | 2  | 2   | 1.00 | 1.17 | 1.23 | 1.23 | 1.47 | 0.86 | 0.73 |
| X019923 | BCG_2893  | 99   | 2   | 2  | 2   | 1.00 | 0.79 | 0.86 | 0.97 | 0.64 | 1.27 | 0.67 |
| X019923 | BCG_2897  | 154  | 2   | 2  | 2   | 1.00 | 0.94 | 0.93 | 1.06 | 1.19 | 1.07 | 0.67 |
| X019923 | BCG_2899C | 152  | 7   | 2  | 2   | 1.00 | 0.73 | 0.89 | 1.01 | 1.12 | 1.38 | 1.19 |
| X019923 | BCG_2900C | 78   | 3   | 3  | 3   | 1.00 | 0.73 | 0.77 | 0.74 | 1.06 | 1.37 | 0.66 |
| X019923 | BCG_2901C | 553  | 18  | 12 | 13  | 1.00 | 0.96 | 0.86 | 1.09 | 0.92 | 1.04 | 0.82 |
| X019923 | BCG_2902C | 88   | 6   | 2  | 2   | 1.00 | 0.72 | 0.71 | 0.75 | 0.82 | 1.39 | 0.64 |
| X019923 | BCG_2903C | 662  | 23  | 14 | 17  | 1.00 | 0.90 | 0.91 | 1.14 | 1.22 | 1.11 | 0.65 |
| X019923 | BCG_2904C | 388  | 13  | 7  | 11  | 1.00 | 0.91 | 0.91 | 1.01 | 1.15 | 1.10 | 0.86 |

|         |           |      |    |    |    |      |      |      |      |      |      |      |
|---------|-----------|------|----|----|----|------|------|------|------|------|------|------|
| X019923 | BCG_2905  | 156  | 5  | 2  | 2  | 1.00 | 0.99 | 0.92 | 1.08 | 0.95 | 1.01 | 0.75 |
| X019923 | BCG_2908  | 99   | 11 | 2  | 2  | 1.00 | 0.56 | 0.49 | 0.60 | 0.64 | 1.78 | 0.43 |
| X019923 | BCG_2909C | 907  | 45 | 16 | 29 | 1.00 | 0.90 | 0.95 | 1.19 | 1.17 | 1.12 | 0.63 |
| X019923 | BCG_2910C | 1408 | 60 | 23 | 48 | 1.00 | 0.89 | 0.95 | 1.11 | 1.27 | 1.13 | 0.74 |
| X019923 | BCG_2911C | 1052 | 70 | 18 | 51 | 1.00 | 0.95 | 0.96 | 1.07 | 1.01 | 1.05 | 0.81 |
| X019923 | BCG_2914  | 383  | 12 | 6  | 7  | 1.00 | 0.97 | 0.85 | 1.08 | 1.05 | 1.03 | 0.84 |
| X019923 | BCG_2916C | 352  | 9  | 7  | 9  | 1.00 | 0.91 | 1.00 | 1.23 | 1.37 | 1.10 | 0.78 |
| X019923 | BCG_2922C | 350  | 11 | 6  | 7  | 1.00 | 0.81 | 0.87 | 0.95 | 1.08 | 1.23 | 0.70 |
| X019923 | BCG_2924C | 350  | 12 | 7  | 9  | 1.00 | 0.83 | 0.86 | 1.02 | 1.09 | 1.21 | 0.77 |
| X019923 | BCG_2925C | 656  | 51 | 13 | 28 | 1.00 | 0.90 | 0.79 | 0.89 | 0.85 | 1.11 | 0.77 |
| X019923 | BCG_2927C | 171  | 7  | 4  | 4  | 1.00 | 0.79 | 0.83 | 1.07 | 1.12 | 1.27 | 0.62 |
| X019923 | BCG_2928C | 44   | 2  | 2  | 2  | 1.00 | 1.02 | 1.29 | 1.32 | 1.28 | 0.98 | 1.09 |
| X019923 | BCG_2929C | 519  | 17 | 8  | 16 | 1.00 | 0.83 | 0.84 | 0.90 | 0.89 | 1.20 | 0.74 |
| X019923 | BCG_2930C | 394  | 36 | 8  | 24 | 1.00 | 0.87 | 0.76 | 0.84 | 0.75 | 1.15 | 0.71 |
| X019923 | BCG_2934C | 269  | 10 | 4  | 4  | 1.00 | 0.87 | 0.94 | 1.04 | 1.05 | 1.15 | 1.01 |
| X019923 | BCG_2935C | 133  | 5  | 3  | 3  | 1.00 | 0.92 | 0.93 | 0.97 | 0.98 | 1.09 | 0.91 |
| X019923 | BCG_2936C | 194  | 5  | 4  | 4  | 1.00 | 0.82 | 0.95 | 0.83 | 0.77 | 1.22 | 0.93 |
| X019923 | BCG_2937C | 1058 | 27 | 17 | 21 | 1.00 | 0.96 | 0.92 | 1.00 | 1.13 | 1.04 | 0.70 |
| X019923 | BCG_2938  | 242  | 9  | 5  | 6  | 1.00 | 0.79 | 0.94 | 0.98 | 0.90 | 1.27 | 0.84 |
| X019923 | BCG_2939C | 83   | 4  | 2  | 2  | 1.00 | 0.81 | 1.33 | 0.92 | 1.07 | 1.23 | 1.13 |
| X019923 | BCG_2940C | 152  | 6  | 3  | 3  | 1.00 | 0.87 | 0.96 | 1.19 | 1.38 | 1.15 | 0.75 |
| X019923 | BCG_2942C | 688  | 23 | 14 | 19 | 1.00 | 0.90 | 0.88 | 0.92 | 0.99 | 1.11 | 0.96 |
| X019923 | BCG_2943C | 2097 | 58 | 37 | 41 | 1.00 | 0.82 | 0.72 | 0.73 | 0.62 | 1.22 | 0.94 |
| X019923 | BCG_2944C | 230  | 7  | 4  | 5  | 1.00 | 0.90 | 0.91 | 1.05 | 1.11 | 1.11 | 0.70 |
| X019923 | BCG_2945C | 205  | 7  | 6  | 7  | 1.00 | 0.87 | 0.88 | 1.18 | 1.09 | 1.15 | 0.69 |
| X019923 | BCG_2946C | 69   | 3  | 2  | 2  | 1.00 | 0.91 | 0.50 | 0.29 | 1.37 | 1.10 | 0.66 |
| X019923 | BCG_2947C | 259  | 6  | 5  | 5  | 1.00 | 0.92 | 0.94 | 1.09 | 1.23 | 1.08 | 0.75 |
| X019923 | BCG_2948C | 122  | 6  | 3  | 3  | 1.00 | 0.93 | 0.62 | 0.82 | 0.79 | 1.08 | 0.87 |
| X019923 | BCG_2949C | 855  | 34 | 18 | 26 | 1.00 | 0.87 | 0.86 | 0.91 | 0.83 | 1.15 | 0.85 |
| X019923 | BCG_2950  | 348  | 14 | 7  | 10 | 1.00 | 0.89 | 0.97 | 1.16 | 1.30 | 1.13 | 0.69 |
| X019923 | BCG_2952  | 688  | 29 | 12 | 15 | 1.00 | 0.52 | 0.53 | 0.68 | 0.66 | 1.92 | 0.45 |
| X019923 | BCG_2954  | 101  | 8  | 2  | 2  | 1.00 | 0.82 | 0.79 | 0.87 | 0.78 | 1.22 | 1.15 |
| X019923 | BCG_2955  | 566  | 30 | 12 | 12 | 1.00 | 0.92 | 0.80 | 0.95 | 0.92 | 1.08 | 1.04 |
| X019923 | BCG_2956  | 493  | 21 | 9  | 9  | 1.00 | 0.74 | 0.74 | 0.85 | 0.75 | 1.36 | 1.17 |
| X019923 | BCG_2957  | 1263 | 44 | 29 | 30 | 1.00 | 0.81 | 0.77 | 0.81 | 0.85 | 1.24 | 1.01 |
| X019923 | BCG_2958  | 324  | 13 | 8  | 11 | 1.00 | 0.84 | 0.84 | 0.95 | 0.93 | 1.19 | 0.75 |
| X019923 | BCG_2959  | 131  | 5  | 4  | 4  | 1.00 | 0.87 | 0.73 | 0.87 | 0.74 | 1.15 | 0.92 |
| X019923 | BCG_2960  | 124  | 6  | 5  | 5  | 1.00 | 0.89 | 0.88 | 1.00 | 1.01 | 1.13 | 1.10 |
| X019923 | BCG_2961  | 124  | 4  | 3  | 3  | 1.00 | 1.03 | 1.16 | 1.08 | 1.41 | 0.97 | 0.72 |

|         |           |      |     |    |     |      |      |      |      |      |      |      |
|---------|-----------|------|-----|----|-----|------|------|------|------|------|------|------|
| X019923 | BCG_2962C | 5609 | 242 | 86 | 147 | 1.00 | 0.82 | 0.71 | 0.71 | 0.68 | 1.22 | 1.00 |
| X019923 | BCG_2963  | 944  | 37  | 15 | 19  | 1.00 | 0.93 | 0.95 | 1.06 | 1.15 | 1.08 | 0.72 |
| X019923 | BCG_2964  | 869  | 33  | 17 | 24  | 1.00 | 0.83 | 0.78 | 0.97 | 0.72 | 1.21 | 1.11 |
| X019923 | BCG_2967C | 749  | 21  | 11 | 17  | 1.00 | 0.90 | 0.91 | 1.03 | 1.22 | 1.11 | 0.73 |
| X019923 | BCG_2968C | 2219 | 72  | 43 | 51  | 1.00 | 0.81 | 0.71 | 0.71 | 0.68 | 1.24 | 0.92 |
| X019923 | BCG_2969C | 1096 | 31  | 19 | 20  | 1.00 | 0.87 | 0.91 | 0.97 | 0.90 | 1.14 | 0.91 |
| X019923 | BCG_2970C | 424  | 13  | 7  | 8   | 1.00 | 0.92 | 0.99 | 1.15 | 1.24 | 1.09 | 0.77 |
| X019923 | BCG_2971C | 619  | 20  | 13 | 14  | 1.00 | 0.94 | 0.95 | 1.12 | 1.23 | 1.06 | 0.81 |
| X019923 | BCG_2972C | 1002 | 38  | 19 | 29  | 1.00 | 0.88 | 0.88 | 0.99 | 1.07 | 1.13 | 0.83 |
| X019923 | BCG_2973  | 371  | 12  | 9  | 9   | 1.00 | 0.83 | 0.96 | 1.13 | 1.32 | 1.20 | 0.77 |
| X019923 | BCG_2974  | 1133 | 57  | 17 | 24  | 1.00 | 0.87 | 0.80 | 0.95 | 1.04 | 1.15 | 0.76 |
| X019923 | BCG_2975C | 157  | 6   | 5  | 6   | 1.00 | 1.05 | 0.98 | 1.10 | 1.10 | 0.96 | 0.94 |
| X019923 | BCG_2976C | 280  | 8   | 6  | 6   | 1.00 | 0.91 | 1.09 | 1.27 | 1.29 | 1.09 | 0.80 |
| X019923 | BCG_2977  | 120  | 8   | 3  | 3   | 1.00 | 0.94 | 0.90 | 1.09 | 1.03 | 1.06 | 0.84 |
| X019923 | BCG_2978  | 259  | 8   | 5  | 6   | 1.00 | 0.87 | 0.87 | 0.92 | 0.91 | 1.15 | 0.84 |
| X019923 | BCG_2979C | 94   | 4   | 2  | 2   | 1.00 | 0.86 | 0.59 | 0.89 | 0.96 | 1.16 | 0.70 |
| X019923 | BCG_2980C | 262  | 10  | 6  | 6   | 1.00 | 0.94 | 0.75 | 0.95 | 1.08 | 1.06 | 0.91 |
| X019923 | BCG_2983C | 529  | 24  | 9  | 12  | 1.00 | 0.89 | 0.81 | 1.03 | 0.87 | 1.13 | 0.89 |
| X019923 | BCG_2984  | 168  | 6   | 4  | 5   | 1.00 | 0.93 | 0.83 | 1.01 | 0.92 | 1.07 | 0.95 |
| X019923 | BCG_2985  | 705  | 39  | 13 | 28  | 1.00 | 0.83 | 0.85 | 0.85 | 0.76 | 1.21 | 0.64 |
| X019923 | BCG_2986C | 100  | 8   | 2  | 2   | 1.00 | 0.84 | 0.94 | 1.04 | 1.30 | 1.19 | 0.86 |
| X019923 | BCG_2987C | 251  | 10  | 7  | 8   | 1.00 | 1.00 | 1.08 | 1.25 | 1.36 | 1.00 | 0.89 |
| X019923 | BCG_2988C | 1153 | 46  | 25 | 29  | 1.00 | 0.79 | 0.79 | 0.79 | 0.80 | 1.27 | 1.04 |
| X019923 | BCG_2990C | 750  | 22  | 11 | 16  | 1.00 | 0.91 | 0.95 | 1.07 | 1.21 | 1.10 | 0.86 |
| X019923 | BCG_2991C | 548  | 15  | 9  | 10  | 1.00 | 0.96 | 1.03 | 1.19 | 1.34 | 1.04 | 0.97 |
| X019923 | BCG_2993  | 801  | 33  | 11 | 22  | 1.00 | 0.88 | 0.93 | 1.28 | 1.25 | 1.13 | 0.69 |
| X019923 | BCG_2994C | 76   | 3   | 2  | 2   | 1.00 | 0.93 | 1.17 | 1.11 | 1.18 | 1.08 | 1.29 |
| X019923 | BCG_2996C | 348  | 6   | 6  | 6   | 1.00 | 0.96 | 0.95 | 1.00 | 1.00 | 1.04 | 0.96 |
| X019923 | BCG_2997C | 138  | 7   | 4  | 6   | 1.00 | 0.91 | 0.91 | 0.97 | 1.11 | 1.10 | 0.58 |
| X019923 | BCG_2998C | 126  | 3   | 3  | 3   | 1.00 | 0.85 | 1.01 | 1.14 | 1.21 | 1.18 | 0.85 |
| X019923 | BCG_3001  | 59   | 3   | 2  | 2   | 1.00 | 0.81 | 0.57 | 1.23 | 1.17 | 1.23 | 0.78 |
| X019923 | BCG_3002C | 844  | 44  | 14 | 33  | 1.00 | 0.88 | 0.86 | 0.87 | 0.74 | 1.13 | 0.76 |
| X019923 | BCG_3003C | 187  | 7   | 4  | 4   | 1.00 | 0.85 | 0.94 | 0.89 | 1.43 | 1.18 | 0.81 |
| X019923 | BCG_3005  | 1077 | 45  | 23 | 29  | 1.00 | 0.92 | 0.94 | 1.06 | 1.15 | 1.09 | 0.77 |
| X019923 | BCG_3006  | 442  | 16  | 10 | 10  | 1.00 | 0.87 | 0.85 | 0.96 | 0.99 | 1.15 | 0.85 |
| X019923 | BCG_3007C | 271  | 5   | 4  | 4   | 1.00 | 1.72 | 0.78 | 0.80 | 1.06 | 0.58 | 0.84 |
| X019923 | BCG_3008C | 706  | 28  | 10 | 21  | 1.00 | 0.92 | 1.00 | 1.08 | 1.25 | 1.09 | 0.75 |
| X019923 | BCG_3009C | 1195 | 47  | 20 | 33  | 1.00 | 0.90 | 0.91 | 1.19 | 1.16 | 1.11 | 0.77 |
| X019923 | BCG_3010  | 1269 | 43  | 20 | 32  | 1.00 | 1.03 | 0.85 | 0.95 | 1.01 | 0.97 | 0.67 |

|         |           |      |    |    |    |      |      |      |      |      |      |      |
|---------|-----------|------|----|----|----|------|------|------|------|------|------|------|
| X019923 | BCG_3013C | 719  | 24 | 13 | 17 | 1.00 | 0.95 | 0.95 | 1.17 | 1.32 | 1.06 | 0.84 |
| X019923 | BCG_3014C | 196  | 10 | 5  | 7  | 1.00 | 0.88 | 0.96 | 1.28 | 1.29 | 1.14 | 0.80 |
| X019923 | BCG_3016C | 671  | 21 | 11 | 16 | 1.00 | 0.89 | 0.89 | 0.98 | 1.08 | 1.13 | 0.74 |
| X019923 | BCG_3017C | 1527 | 53 | 22 | 39 | 1.00 | 0.92 | 0.92 | 0.96 | 1.01 | 1.09 | 0.85 |
| X019923 | BCG_3018  | 91   | 5  | 2  | 2  | 1.00 | 1.15 | 1.32 | 1.69 | 1.52 | 0.87 | 1.34 |
| X019923 | BCG_3021  | 397  | 14 | 8  | 8  | 1.00 | 0.78 | 0.88 | 1.04 | 1.04 | 1.28 | 0.90 |
| X019923 | BCG_3023C | 809  | 33 | 17 | 22 | 1.00 | 0.92 | 0.98 | 1.19 | 1.33 | 1.09 | 0.85 |
| X019923 | BCG_3024C | 497  | 16 | 12 | 14 | 1.00 | 0.88 | 0.86 | 0.96 | 1.11 | 1.13 | 0.81 |
| X019923 | BCG_3025C | 406  | 16 | 10 | 12 | 1.00 | 0.88 | 0.95 | 0.94 | 1.14 | 1.14 | 0.85 |
| X019923 | BCG_3027C | 147  | 3  | 3  | 3  | 1.00 | 0.93 | 0.85 | 0.99 | 1.01 | 1.08 | 0.85 |
| X019923 | BCG_3028  | 318  | 9  | 5  | 7  | 1.00 | 0.88 | 0.93 | 0.90 | 1.19 | 1.14 | 0.90 |
| X019923 | BCG_3031C | 932  | 30 | 16 | 18 | 1.00 | 0.89 | 0.90 | 1.03 | 1.11 | 1.13 | 0.75 |
| X019923 | BCG_3032C | 566  | 23 | 12 | 18 | 1.00 | 0.96 | 0.99 | 1.23 | 1.38 | 1.04 | 0.81 |
| X019923 | BCG_3033C | 835  | 29 | 15 | 17 | 1.00 | 0.90 | 0.92 | 1.10 | 1.22 | 1.11 | 0.78 |
| X019923 | BCG_3034C | 183  | 5  | 3  | 4  | 1.00 | 0.85 | 0.83 | 0.97 | 1.08 | 1.18 | 0.79 |
| X019923 | BCG_3035  | 202  | 5  | 4  | 4  | 1.00 | 0.75 | 0.84 | 0.94 | 0.98 | 1.33 | 0.66 |
| X019923 | BCG_3036C | 477  | 17 | 10 | 10 | 1.00 | 0.90 | 1.03 | 1.22 | 1.19 | 1.11 | 0.84 |
| X019923 | BCG_3037C | 258  | 9  | 6  | 6  | 1.00 | 0.80 | 0.89 | 1.16 | 1.25 | 1.26 | 0.78 |
| X019923 | BCG_3048C | 81   | 3  | 2  | 2  | 1.00 | 0.91 | 0.90 | 1.22 | 1.34 | 1.10 | 0.81 |
| X019923 | BCG_3050C | 77   | 2  | 2  | 2  | 1.00 | 0.74 | 1.05 | 0.94 | 0.95 | 1.35 | 1.07 |
| X019923 | BCG_3051C | 855  | 22 | 12 | 15 | 1.00 | 0.90 | 0.97 | 1.15 | 1.33 | 1.11 | 0.71 |
| X019923 | BCG_3052C | 932  | 41 | 19 | 31 | 1.00 | 0.86 | 0.96 | 1.12 | 1.29 | 1.16 | 0.67 |
| X019923 | BCG_3054  | 812  | 29 | 19 | 23 | 1.00 | 0.92 | 0.89 | 1.23 | 0.95 | 1.09 | 2.00 |
| X019923 | BCG_3056  | 163  | 9  | 4  | 5  | 1.00 | 0.81 | 0.95 | 1.12 | 1.08 | 1.24 | 0.51 |
| X019923 | BCG_3057  | 77   | 5  | 2  | 3  | 1.00 | 0.83 | 0.76 | 0.72 | 0.87 | 1.21 | 0.68 |
| X019923 | BCG_3058C | 615  | 28 | 13 | 20 | 1.00 | 0.88 | 0.89 | 0.84 | 1.04 | 1.14 | 1.04 |
| X019923 | BCG_3059  | 226  | 10 | 6  | 9  | 1.00 | 0.87 | 0.81 | 1.03 | 0.98 | 1.15 | 0.85 |
| X019923 | BCG_3061C | 124  | 5  | 4  | 4  | 1.00 | 0.96 | 1.78 | 1.27 | 1.22 | 1.04 | 0.96 |
| X019923 | BCG_3062C | 353  | 11 | 7  | 8  | 1.00 | 0.91 | 0.89 | 1.02 | 1.14 | 1.10 | 1.01 |
| X019923 | BCG_3063C | 485  | 12 | 8  | 11 | 1.00 | 0.93 | 0.80 | 0.86 | 0.89 | 1.07 | 1.41 |
| X019923 | BCG_3064C | 178  | 6  | 4  | 4  | 1.00 | 0.95 | 0.98 | 1.18 | 1.29 | 1.05 | 0.75 |
| X019923 | BCG_3065C | 222  | 7  | 5  | 6  | 1.00 | 1.03 | 1.15 | 1.18 | 0.92 | 0.97 | 1.01 |
| X019923 | BCG_3066C | 601  | 15 | 10 | 12 | 1.00 | 0.87 | 0.90 | 1.08 | 1.27 | 1.15 | 0.79 |
| X019923 | BCG_3067C | 238  | 18 | 6  | 13 | 1.00 | 0.79 | 0.80 | 0.84 | 0.90 | 1.26 | 0.84 |
| X019923 | BCG_3068  | 430  | 12 | 8  | 11 | 1.00 | 0.97 | 0.92 | 1.01 | 0.99 | 1.03 | 0.92 |
| X019923 | BCG_3069  | 949  | 49 | 16 | 37 | 1.00 | 0.87 | 0.87 | 1.05 | 1.16 | 1.15 | 0.69 |
| X019923 | BCG_3070C | 124  | 3  | 2  | 2  | 1.00 | 0.85 | 0.83 | 1.12 | 1.10 | 1.18 | 0.59 |
| X019923 | BCG_3072C | 548  | 21 | 11 | 12 | 1.00 | 0.88 | 1.02 | 1.20 | 1.32 | 1.14 | 0.81 |
| X019923 | BCG_3073C | 462  | 17 | 11 | 11 | 1.00 | 0.85 | 0.81 | 1.05 | 1.08 | 1.18 | 0.70 |

|         |           |      |    |    |    |      |      |      |      |      |      |      |
|---------|-----------|------|----|----|----|------|------|------|------|------|------|------|
| X019923 | BCG_3074C | 435  | 24 | 8  | 17 | 1.00 | 0.94 | 0.99 | 1.12 | 1.23 | 1.06 | 0.88 |
| X019923 | BCG_3075C | 1148 | 42 | 23 | 31 | 1.00 | 0.92 | 0.95 | 1.13 | 1.12 | 1.09 | 0.84 |
| X019923 | BCG_3079C | 290  | 10 | 6  | 7  | 1.00 | 0.88 | 0.90 | 1.01 | 1.13 | 1.13 | 0.76 |
| X019923 | BCG_3082C | 623  | 17 | 13 | 15 | 1.00 | 0.91 | 0.95 | 0.97 | 1.09 | 1.10 | 0.89 |
| X019923 | BCG_3083C | 186  | 7  | 4  | 4  | 1.00 | 1.07 | 0.97 | 1.16 | 1.06 | 0.94 | 0.97 |
| X019923 | BCG_3086C | 66   | 2  | 2  | 2  | 1.00 | 0.92 | 0.96 | 1.10 | 1.08 | 1.08 | 1.03 |
| X019923 | BCG_3087  | 173  | 22 | 5  | 5  | 1.00 | 1.03 | 0.77 | 0.89 | 0.78 | 0.97 | 0.92 |
| X019923 | BCG_3093C | 403  | 16 | 9  | 10 | 1.00 | 0.94 | 1.05 | 1.10 | 1.23 | 1.06 | 0.91 |
| X019923 | BCG_3094  | 78   | 2  | 2  | 2  | 1.00 | 0.81 | 0.95 | 1.01 | 0.97 | 1.24 | 0.76 |
| X019923 | BCG_3096  | 107  | 6  | 3  | 3  | 1.00 | 0.92 | 0.89 | 1.00 | 0.98 | 1.09 | 0.94 |
| X019923 | BCG_3100C | 835  | 28 | 13 | 25 | 1.00 | 0.91 | 0.97 | 1.02 | 1.14 | 1.10 | 0.81 |
| X019923 | BCG_3101  | 85   | 8  | 3  | 4  | 1.00 | 0.90 | 0.93 | 0.96 | 1.03 | 1.11 | 0.80 |
| X019923 | BCG_3102  | 620  | 24 | 15 | 18 | 1.00 | 0.87 | 0.90 | 0.99 | 1.06 | 1.14 | 0.93 |
| X019923 | BCG_3104C | 396  | 11 | 8  | 9  | 1.00 | 0.91 | 0.90 | 1.02 | 1.20 | 1.10 | 0.94 |
| X019923 | BCG_3107C | 202  | 7  | 6  | 6  | 1.00 | 1.02 | 0.72 | 1.04 | 1.17 | 0.98 | 1.07 |
| X019923 | BCG_3114  | 206  | 10 | 5  | 5  | 1.00 | 0.92 | 0.93 | 1.18 | 1.11 | 1.09 | 0.82 |
| X019923 | BCG_3115  | 475  | 16 | 7  | 10 | 1.00 | 0.87 | 0.81 | 0.82 | 0.78 | 1.15 | 0.97 |
| X019923 | BCG_3116  | 1040 | 28 | 16 | 20 | 1.00 | 1.02 | 0.88 | 0.97 | 0.99 | 0.98 | 0.91 |
| X019923 | BCG_3117C | 205  | 5  | 3  | 3  | 1.00 | 1.02 | 1.28 | 1.03 | 1.21 | 0.98 | 1.08 |
| X019923 | BCG_3118C | 419  | 13 | 8  | 9  | 1.00 | 0.81 | 0.92 | 0.92 | 0.88 | 1.23 | 0.70 |
| X019923 | BCG_3119C | 274  | 6  | 6  | 6  | 1.00 | 0.88 | 0.97 | 1.09 | 1.17 | 1.14 | 0.90 |
| X019923 | BCG_3124C | 755  | 35 | 13 | 24 | 1.00 | 0.92 | 0.85 | 1.05 | 1.16 | 1.09 | 6.08 |
| X019923 | BCG_3125C | 119  | 7  | 3  | 4  | 1.00 | 0.92 | 0.84 | 0.88 | 0.85 | 1.08 | 0.74 |
| X019923 | BCG_3126C | 281  | 13 | 7  | 11 | 1.00 | 0.89 | 0.90 | 1.05 | 1.02 | 1.13 | 0.95 |
| X019923 | BCG_3127C | 717  | 34 | 14 | 22 | 1.00 | 0.89 | 0.84 | 0.92 | 0.93 | 1.12 | 0.78 |
| X019923 | BCG_3129C | 405  | 9  | 7  | 7  | 1.00 | 0.91 | 0.84 | 0.88 | 1.02 | 1.10 | 0.91 |
| X019923 | BCG_3130C | 611  | 17 | 9  | 9  | 1.00 | 0.95 | 1.08 | 1.21 | 1.39 | 1.05 | 0.81 |
| X019923 | BCG_3131  | 388  | 13 | 7  | 8  | 1.00 | 0.86 | 0.93 | 1.10 | 1.29 | 1.17 | 0.67 |
| X019923 | BCG_3132C | 115  | 6  | 2  | 2  | 1.00 | 0.50 | 1.07 | 0.88 | 0.81 | 2.01 | 0.52 |
| X019923 | BCG_3141  | 188  | 6  | 3  | 3  | 1.00 | 0.88 | 0.95 | 0.78 | 0.76 | 1.14 | 0.91 |
| X019923 | BCG_3142  | 1137 | 48 | 22 | 41 | 1.00 | 0.85 | 0.95 | 1.07 | 1.23 | 1.17 | 0.66 |
| X019923 | BCG_3149  | 334  | 12 | 8  | 8  | 1.00 | 0.95 | 0.99 | 1.13 | 1.03 | 1.05 | 0.91 |
| X019923 | BCG_3153C | 330  | 13 | 8  | 9  | 1.00 | 0.86 | 0.72 | 0.82 | 0.81 | 1.16 | 0.77 |
| X019923 | BCG_3154  | 262  | 9  | 6  | 6  | 1.00 | 0.78 | 0.88 | 1.01 | 1.21 | 1.27 | 0.73 |
| X019923 | BCG_3155C | 295  | 13 | 6  | 6  | 1.00 | 0.95 | 0.91 | 0.88 | 0.96 | 1.05 | 0.82 |
| X019923 | BCG_3156C | 437  | 18 | 8  | 11 | 1.00 | 0.84 | 0.88 | 1.00 | 1.12 | 1.20 | 0.68 |
| X019923 | BCG_3157C | 328  | 13 | 6  | 6  | 1.00 | 0.85 | 0.93 | 1.04 | 1.07 | 1.18 | 0.88 |
| X019923 | BCG_3158  | 264  | 14 | 6  | 10 | 1.00 | 0.91 | 0.83 | 0.87 | 0.76 | 1.10 | 0.84 |
| X019923 | BCG_3160  | 295  | 8  | 6  | 6  | 1.00 | 0.84 | 0.86 | 1.04 | 0.87 | 1.18 | 1.27 |



|         |           |      |    |    |    |      |      |      |      |      |      |      |
|---------|-----------|------|----|----|----|------|------|------|------|------|------|------|
| X019923 | BCG_3162  | 976  | 29 | 16 | 18 | 1.00 | 0.90 | 0.97 | 1.04 | 1.14 | 1.11 | 0.92 |
| X019923 | BCG_3163  | 802  | 32 | 15 | 21 | 1.00 | 0.92 | 0.91 | 0.95 | 1.06 | 1.08 | 0.91 |
| X019923 | BCG_3164  | 393  | 11 | 8  | 11 | 1.00 | 0.95 | 0.97 | 1.16 | 1.32 | 1.05 | 0.76 |
| X019923 | BCG_3166  | 233  | 10 | 4  | 7  | 1.00 | 0.96 | 0.96 | 1.02 | 1.09 | 1.04 | 0.69 |
| X019923 | BCG_3168  | 130  | 4  | 3  | 3  | 1.00 | 0.68 | 0.71 | 0.73 | 0.84 | 1.47 | 0.80 |
| X019923 | BCG_3169  | 462  | 17 | 7  | 12 | 1.00 | 0.90 | 0.89 | 0.98 | 1.11 | 1.12 | 0.84 |
| X019923 | BCG_3170  | 314  | 14 | 8  | 10 | 1.00 | 0.89 | 0.90 | 1.08 | 1.18 | 1.12 | 0.84 |
| X019923 | BCG_3171  | 500  | 15 | 10 | 10 | 1.00 | 0.83 | 0.77 | 0.91 | 0.97 | 1.20 | 0.81 |
| X019923 | BCG_3172  | 386  | 12 | 7  | 9  | 1.00 | 0.91 | 0.85 | 1.05 | 1.08 | 1.10 | 0.84 |
| X019923 | BCG_3173  | 620  | 22 | 10 | 14 | 1.00 | 0.83 | 0.88 | 0.94 | 1.19 | 1.21 | 0.83 |
| X019923 | BCG_3174  | 1067 | 35 | 21 | 25 | 1.00 | 1.00 | 0.94 | 0.92 | 1.00 | 1.00 | 0.91 |
| X019923 | BCG_3175  | 151  | 5  | 2  | 3  | 1.00 | 0.83 | 0.88 | 0.91 | 1.04 | 1.20 | 1.15 |
| X019923 | BCG_3176  | 290  | 10 | 6  | 7  | 1.00 | 0.95 | 0.97 | 1.32 | 1.22 | 1.05 | 0.81 |
| X019923 | BCG_3178  | 193  | 4  | 3  | 3  | 1.00 | 0.97 | 0.87 | 0.88 | 0.90 | 1.03 | 0.83 |
| X019923 | BCG_3179  | 223  | 12 | 4  | 7  | 1.00 | 0.89 | 0.96 | 0.94 | 0.91 | 1.12 | 0.94 |
| X019923 | BCG_3180  | 170  | 6  | 3  | 4  | 1.00 | 0.81 | 0.77 | 0.88 | 0.95 | 1.23 | 0.99 |
| X019923 | BCG_3181  | 331  | 11 | 6  | 9  | 1.00 | 0.92 | 0.79 | 0.96 | 0.91 | 1.09 | 0.98 |
| X019923 | BCG_3184C | 224  | 7  | 5  | 5  | 1.00 | 0.82 | 1.10 | 1.14 | 1.37 | 1.22 | 0.98 |
| X019923 | BCG_3185C | 725  | 36 | 11 | 20 | 1.00 | 0.95 | 0.93 | 1.08 | 1.26 | 1.06 | 0.80 |
| X019923 | BCG_3192  | 56   | 3  | 2  | 2  | 1.00 | 0.84 | 0.90 | 0.89 | 0.94 | 1.20 | 0.63 |
| X019923 | BCG_3193  | 244  | 10 | 7  | 7  | 1.00 | 0.79 | 0.91 | 1.00 | 1.00 | 1.27 | 0.77 |
| X019923 | BCG_3194  | 71   | 6  | 2  | 2  | 1.00 | 1.09 | 1.03 | 2.03 | 1.82 | 0.92 | 1.86 |
| X019923 | BCG_3197C | 84   | 5  | 2  | 3  | 1.00 | 0.79 | 0.58 | 0.92 | 0.86 | 1.27 | 0.75 |
| X019923 | BCG_3207C | 56   | 2  | 2  | 2  | 1.00 | 0.82 | 1.08 | 1.15 | 1.23 | 1.21 | 0.58 |
| X019923 | BCG_3212C | 69   | 6  | 2  | 2  | 1.00 | 0.92 | 0.63 | 0.82 | 0.93 | 1.09 | 0.58 |
| X019923 | BCG_3215C | 1899 | 73 | 31 | 49 | 1.00 | 0.82 | 0.72 | 0.66 | 0.64 | 1.22 | 1.05 |
| X019923 | BCG_3216C | 266  | 8  | 5  | 6  | 1.00 | 0.92 | 0.98 | 0.98 | 1.06 | 1.08 | 0.93 |
| X019923 | BCG_3219C | 86   | 2  | 2  | 2  | 1.00 | 1.27 | 1.26 | 1.24 | 1.80 | 0.79 | 1.06 |
| X019923 | BCG_3220  | 409  | 23 | 9  | 9  | 1.00 | 1.12 | 1.04 | 1.31 | 1.56 | 0.89 | 1.02 |
| X019923 | BCG_3222C | 465  | 16 | 10 | 10 | 1.00 | 0.98 | 0.82 | 0.92 | 0.93 | 1.03 | 0.84 |
| X019923 | BCG_3223  | 279  | 7  | 5  | 7  | 1.00 | 0.86 | 0.89 | 1.18 | 1.05 | 1.16 | 0.68 |
| X019923 | BCG_3224C | 173  | 4  | 4  | 4  | 1.00 | 0.70 | 0.92 | 0.85 | 1.24 | 1.42 | 0.75 |
| X019923 | BCG_3225C | 686  | 23 | 10 | 14 | 1.00 | 0.88 | 0.88 | 0.97 | 1.00 | 1.13 | 0.82 |
| X019923 | BCG_3231C | 347  | 16 | 8  | 11 | 1.00 | 1.09 | 1.01 | 1.21 | 1.28 | 0.92 | 0.71 |
| X019923 | BCG_3232C | 649  | 22 | 11 | 14 | 1.00 | 0.93 | 0.92 | 1.12 | 1.22 | 1.08 | 0.81 |
| X019923 | BCG_3233C | 132  | 6  | 4  | 4  | 1.00 | 0.83 | 0.85 | 0.91 | 0.90 | 1.21 | 0.75 |
| X019923 | BCG_3234  | 207  | 9  | 4  | 6  | 1.00 | 0.97 | 1.07 | 1.21 | 1.37 | 1.03 | 0.77 |
| X019923 | BCG_3235C | 389  | 7  | 6  | 7  | 1.00 | 0.93 | 0.88 | 1.03 | 1.11 | 1.08 | 0.64 |
| X019923 | BCG_3237C | 226  | 10 | 6  | 7  | 1.00 | 0.81 | 0.92 | 1.07 | 1.13 | 1.23 | 0.67 |

|         |           |      |     |    |    |      |      |      |      |      |      |      |
|---------|-----------|------|-----|----|----|------|------|------|------|------|------|------|
| X019923 | BCG_3238  | 1065 | 46  | 19 | 27 | 1.00 | 0.98 | 1.01 | 1.05 | 0.99 | 1.02 | 0.80 |
| X019923 | BCG_3239  | 122  | 7   | 3  | 3  | 1.00 | 0.73 | 0.87 | 1.34 | 1.15 | 1.38 | 1.03 |
| X019923 | BCG_3240C | 434  | 20  | 9  | 10 | 1.00 | 0.86 | 0.81 | 0.90 | 0.87 | 1.17 | 0.78 |
| X019923 | BCG_3245  | 568  | 16  | 11 | 13 | 1.00 | 0.95 | 0.88 | 1.08 | 1.21 | 1.06 | 0.88 |
| X019923 | BCG_3251C | 587  | 24  | 11 | 18 | 1.00 | 0.87 | 0.92 | 1.06 | 1.22 | 1.15 | 0.70 |
| X019923 | BCG_3252  | 891  | 57  | 13 | 45 | 1.00 | 0.89 | 0.94 | 1.09 | 1.31 | 1.12 | 0.71 |
| X019923 | BCG_3255C | 1356 | 32  | 24 | 28 | 1.00 | 0.89 | 0.88 | 0.87 | 0.82 | 1.12 | 0.71 |
| X019923 | BCG_3257  | 664  | 17  | 12 | 12 | 1.00 | 0.95 | 1.01 | 1.22 | 1.38 | 1.05 | 0.72 |
| X019923 | BCG_3259C | 381  | 16  | 11 | 14 | 1.00 | 0.84 | 0.77 | 0.92 | 0.83 | 1.18 | 0.73 |
| X019923 | BCG_3260C | 164  | 6   | 3  | 3  | 1.00 | 0.89 | 0.80 | 0.97 | 0.90 | 1.12 | 0.70 |
| X019923 | BCG_3261C | 146  | 4   | 2  | 3  | 1.00 | 0.90 | 0.98 | 1.42 | 1.39 | 1.12 | 0.76 |
| X019923 | BCG_3263C | 321  | 15  | 5  | 6  | 1.00 | 0.86 | 0.78 | 1.04 | 1.23 | 1.16 | 0.78 |
| X019923 | BCG_3266C | 96   | 2   | 2  | 2  | 1.00 | 0.93 | 0.86 | 1.09 | 1.23 | 1.08 | 0.74 |
| X019923 | BCG_3267C | 101  | 3   | 3  | 3  | 1.00 | 0.88 | 0.91 | 0.93 | 1.02 | 1.13 | 1.01 |
| X019923 | BCG_3269C | 1847 | 61  | 33 | 41 | 1.00 | 0.87 | 0.75 | 0.69 | 0.80 | 1.15 | 0.74 |
| X019923 | BCG_3270C | 333  | 10  | 6  | 8  | 1.00 | 0.88 | 0.79 | 0.79 | 0.76 | 1.13 | 0.48 |
| X019923 | BCG_3273C | 367  | 13  | 8  | 8  | 1.00 | 0.89 | 0.82 | 0.94 | 0.90 | 1.12 | 0.76 |
| X019923 | BCG_3274C | 331  | 12  | 6  | 6  | 1.00 | 0.93 | 0.70 | 0.83 | 0.91 | 1.07 | 0.94 |
| X019923 | BCG_3275C | 707  | 27  | 10 | 17 | 1.00 | 0.92 | 0.99 | 1.19 | 1.39 | 1.08 | 0.72 |
| X019923 | BCG_3276C | 209  | 6   | 6  | 6  | 1.00 | 0.89 | 0.90 | 0.95 | 1.10 | 1.12 | 0.87 |
| X019923 | BCG_3277C | 1721 | 117 | 31 | 87 | 1.00 | 0.87 | 0.88 | 0.99 | 1.14 | 1.16 | 0.78 |
| X019923 | BCG_3278C | 79   | 4   | 3  | 3  | 1.00 | 1.05 | 1.21 | 1.91 | 1.56 | 0.95 | 0.84 |
| X019923 | BCG_3283  | 168  | 6   | 4  | 4  | 1.00 | 0.81 | 0.87 | 0.87 | 0.86 | 1.24 | 0.85 |
| X019923 | BCG_3284C | 214  | 12  | 5  | 6  | 1.00 | 0.99 | 0.96 | 1.29 | 1.31 | 1.01 | 0.87 |
| X019923 | BCG_3285C | 689  | 17  | 13 | 14 | 1.00 | 0.86 | 0.77 | 0.92 | 0.94 | 1.17 | 0.77 |
| X019923 | BCG_3286C | 329  | 11  | 8  | 9  | 1.00 | 0.90 | 1.00 | 1.14 | 1.25 | 1.11 | 0.73 |
| X019923 | BCG_3288  | 162  | 11  | 2  | 3  | 1.00 | 0.83 | 0.79 | 0.88 | 1.06 | 1.20 | 0.65 |
| X019923 | BCG_3289C | 79   | 2   | 2  | 2  | 1.00 | 0.88 | 0.74 | 0.90 | 0.97 | 1.14 | 0.41 |
| X019923 | BCG_3290  | 165  | 10  | 4  | 4  | 1.00 | 0.86 | 1.02 | 0.91 | 1.20 | 1.16 | 1.29 |
| X019923 | BCG_3291  | 340  | 10  | 7  | 7  | 1.00 | 1.00 | 0.93 | 1.11 | 1.12 | 1.00 | 0.83 |
| X019923 | BCG_3293C | 639  | 20  | 12 | 14 | 1.00 | 0.95 | 0.95 | 1.16 | 1.28 | 1.05 | 0.82 |
| X019923 | BCG_3294C | 518  | 14  | 8  | 9  | 1.00 | 0.94 | 0.87 | 1.03 | 1.05 | 1.07 | 0.72 |
| X019923 | BCG_3295C | 251  | 9   | 7  | 7  | 1.00 | 0.72 | 0.86 | 1.00 | 1.12 | 1.39 | 0.72 |
| X019923 | BCG_3296  | 274  | 5   | 3  | 3  | 1.00 | 0.96 | 0.89 | 1.07 | 1.14 | 1.04 | 0.81 |
| X019923 | BCG_3298  | 475  | 17  | 7  | 14 | 1.00 | 0.86 | 0.87 | 1.06 | 1.04 | 1.16 | 0.69 |
| X019923 | BCG_3299  | 1092 | 36  | 19 | 23 | 1.00 | 0.90 | 0.85 | 0.91 | 0.79 | 1.11 | 0.83 |
| X019923 | BCG_3300C | 82   | 3   | 3  | 3  | 1.00 | 0.82 | 0.83 | 0.98 | 0.96 | 1.22 | 1.14 |
| X019923 | BCG_3302  | 532  | 18  | 9  | 13 | 1.00 | 0.87 | 0.76 | 0.84 | 0.76 | 1.15 | 0.94 |
| X019923 | BCG_3303C | 1242 | 60  | 21 | 46 | 1.00 | 0.92 | 0.93 | 1.09 | 1.24 | 1.08 | 0.81 |

|         |           |      |     |    |     |      |      |      |      |      |      |      |
|---------|-----------|------|-----|----|-----|------|------|------|------|------|------|------|
| X019923 | BCG_3304C | 281  | 9   | 6  | 7   | 1.00 | 0.83 | 0.90 | 1.03 | 1.03 | 1.21 | 0.69 |
| X019923 | BCG_3305C | 2422 | 459 | 30 | 273 | 1.00 | 0.70 | 0.79 | 0.80 | 0.75 | 1.43 | 0.68 |
| X019923 | BCG_3307C | 124  | 5   | 2  | 2   | 1.00 | 0.80 | 0.94 | 1.13 | 1.28 | 1.25 | 0.85 |
| X019923 | BCG_3308C | 230  | 6   | 4  | 4   | 1.00 | 0.81 | 0.97 | 0.93 | 1.22 | 1.23 | 0.62 |
| X019923 | BCG_3309  | 2079 | 158 | 31 | 122 | 1.00 | 0.88 | 0.83 | 0.84 | 0.77 | 1.14 | 0.73 |
| X019923 | BCG_3310  | 128  | 14  | 3  | 10  | 1.00 | 0.87 | 0.83 | 0.82 | 0.68 | 1.15 | 0.55 |
| X019923 | BCG_3311  | 70   | 4   | 2  | 2   | 1.00 | 0.65 | 0.65 | 0.92 | 0.93 | 1.54 | 0.54 |
| X019923 | BCG_3312  | 801  | 30  | 16 | 22  | 1.00 | 0.78 | 0.94 | 1.05 | 1.08 | 1.28 | 0.70 |
| X019923 | BCG_3314  | 2851 | 259 | 40 | 183 | 1.00 | 0.84 | 0.80 | 0.79 | 0.68 | 1.19 | 0.63 |
| X019923 | BCG_3315C | 420  | 14  | 8  | 10  | 1.00 | 0.92 | 0.82 | 0.93 | 0.92 | 1.08 | 0.86 |
| X019923 | BCG_3316C | 264  | 7   | 5  | 5   | 1.00 | 0.92 | 0.93 | 1.18 | 1.13 | 1.09 | 0.77 |
| X019923 | BCG_3321  | 613  | 22  | 15 | 16  | 1.00 | 0.90 | 0.95 | 1.12 | 1.18 | 1.11 | 0.71 |
| X019923 | BCG_3322  | 841  | 24  | 16 | 18  | 1.00 | 0.94 | 0.94 | 1.15 | 1.32 | 1.06 | 0.88 |
| X019923 | BCG_3324  | 713  | 24  | 16 | 17  | 1.00 | 0.95 | 1.01 | 1.18 | 1.32 | 1.05 | 0.85 |
| X019923 | BCG_3325  | 1269 | 44  | 29 | 31  | 1.00 | 0.83 | 0.77 | 0.80 | 0.80 | 1.20 | 1.08 |
| X019923 | BCG_3334  | 335  | 12  | 5  | 7   | 1.00 | 0.83 | 0.92 | 1.17 | 1.15 | 1.20 | 0.69 |
| X019923 | BCG_3335  | 400  | 15  | 8  | 8   | 1.00 | 1.06 | 1.03 | 1.22 | 1.51 | 0.94 | 0.78 |
| X019923 | BCG_3340C | 1693 | 80  | 28 | 56  | 1.00 | 0.90 | 0.82 | 0.83 | 0.90 | 1.11 | 4.05 |
| X019923 | BCG_3342C | 147  | 10  | 4  | 7   | 1.00 | 0.83 | 0.82 | 1.07 | 1.12 | 1.20 | 0.63 |
| X019923 | BCG_3349C | 394  | 11  | 8  | 9   | 1.00 | 0.81 | 0.89 | 1.17 | 1.04 | 1.23 | 0.77 |
| X019923 | BCG_3351  | 66   | 4   | 2  | 2   | 1.00 | 0.85 | 0.97 | 1.27 | 1.48 | 1.18 | 0.73 |
| X019923 | BCG_3356C | 274  | 8   | 7  | 7   | 1.00 | 0.93 | 0.83 | 1.06 | 0.99 | 1.08 | 0.81 |
| X019923 | BCG_3363C | 98   | 6   | 3  | 3   | 1.00 | 0.83 | 0.88 | 0.88 | 0.76 | 1.21 | 0.93 |
| X019923 | BCG_3364C | 589  | 24  | 14 | 14  | 1.00 | 0.83 | 0.79 | 1.06 | 0.86 | 1.21 | 1.04 |
| X019923 | BCG_3366C | 526  | 20  | 9  | 12  | 1.00 | 0.91 | 0.95 | 1.23 | 1.28 | 1.10 | 0.79 |
| X019923 | BCG_3367C | 1064 | 38  | 20 | 27  | 1.00 | 0.92 | 0.95 | 1.09 | 1.22 | 1.08 | 1.01 |
| X019923 | BCG_3368C | 218  | 10  | 5  | 6   | 1.00 | 0.78 | 0.82 | 0.88 | 0.92 | 1.29 | 0.78 |
| X019923 | BCG_3370C | 317  | 8   | 6  | 6   | 1.00 | 0.86 | 0.92 | 0.93 | 0.95 | 1.16 | 0.83 |
| X019923 | BCG_3371C | 304  | 12  | 7  | 7   | 1.00 | 0.93 | 0.96 | 1.40 | 0.97 | 1.08 | 0.91 |
| X019923 | BCG_3372  | 86   | 3   | 2  | 2   | 1.00 | 0.98 | 0.98 | 1.14 | 1.31 | 1.02 | 0.71 |
| X019923 | BCG_3373  | 152  | 4   | 3  | 3   | 1.00 | 0.91 | 1.01 | 1.16 | 1.25 | 1.10 | 0.80 |
| X019923 | BCG_3374C | 211  | 9   | 5  | 5   | 1.00 | 0.85 | 0.83 | 1.03 | 1.07 | 1.18 | 0.69 |
| X019923 | BCG_3375  | 109  | 4   | 2  | 2   | 1.00 | 0.95 | 0.95 | 1.03 | 1.06 | 1.05 | 0.84 |
| X019923 | BCG_3376  | 349  | 13  | 8  | 8   | 1.00 | 0.85 | 0.82 | 0.88 | 0.96 | 1.18 | 0.78 |
| X019923 | BCG_3379C | 419  | 15  | 10 | 12  | 1.00 | 0.82 | 0.82 | 1.00 | 1.00 | 1.22 | 0.73 |
| X019923 | BCG_3380C | 64   | 2   | 2  | 2   | 1.00 | 0.88 | 0.56 | 0.59 | 0.99 | 1.14 | 0.72 |
| X019923 | BCG_3381C | 190  | 3   | 2  | 2   | 1.00 | 0.76 | 1.32 | 0.97 | 1.39 | 1.31 | 1.04 |
| X019923 | BCG_3384  | 720  | 25  | 14 | 19  | 1.00 | 0.91 | 1.00 | 1.15 | 1.20 | 1.10 | 0.87 |
| X019923 | BCG_3385  | 254  | 13  | 6  | 6   | 1.00 | 0.89 | 0.90 | 1.08 | 1.23 | 1.12 | 0.77 |

|         |           |      |     |    |     |      |      |      |      |      |      |      |
|---------|-----------|------|-----|----|-----|------|------|------|------|------|------|------|
| X019923 | BCG_3388C | 83   | 4   | 2  | 2   | 1.00 | 1.31 | 1.56 | 1.27 | 2.19 | 0.77 | 1.39 |
| X019923 | BCG_3389C | 132  | 4   | 3  | 3   | 1.00 | 1.07 | 1.10 | 1.30 | 1.31 | 0.93 | 0.96 |
| X019923 | BCG_3390C | 42   | 3   | 2  | 2   | 1.00 | 1.00 | 0.85 | 0.91 | 1.19 | 1.00 | 0.81 |
| X019923 | BCG_3399  | 234  | 14  | 6  | 6   | 1.00 | 0.88 | 0.97 | 0.86 | 1.10 | 1.14 | 1.29 |
| X019923 | BCG_3400  | 196  | 5   | 3  | 3   | 1.00 | 0.81 | 0.77 | 1.09 | 0.93 | 1.23 | 0.86 |
| X019923 | BCG_3407C | 346  | 14  | 6  | 9   | 1.00 | 0.91 | 1.06 | 1.24 | 1.40 | 1.10 | 0.78 |
| X019923 | BCG_3408  | 252  | 7   | 4  | 5   | 1.00 | 0.85 | 0.92 | 1.08 | 1.03 | 1.18 | 0.95 |
| X019923 | BCG_3410  | 240  | 6   | 5  | 6   | 1.00 | 0.98 | 1.12 | 1.11 | 1.25 | 1.02 | 0.94 |
| X019923 | BCG_3411  | 157  | 5   | 4  | 4   | 1.00 | 1.05 | 0.98 | 1.15 | 1.19 | 0.95 | 1.07 |
| X019923 | BCG_3412  | 240  | 8   | 5  | 5   | 1.00 | 0.79 | 0.95 | 1.14 | 1.20 | 1.27 | 0.74 |
| X019923 | BCG_3428C | 379  | 11  | 8  | 8   | 1.00 | 0.84 | 1.04 | 1.33 | 1.50 | 1.18 | 0.72 |
| X019923 | BCG_3437C | 234  | 12  | 5  | 5   | 1.00 | 0.83 | 0.89 | 0.74 | 0.83 | 1.21 | 0.96 |
| X019923 | BCG_3438  | 70   | 3   | 2  | 2   | 1.00 | 0.84 | 0.89 | 0.96 | 1.03 | 1.19 | 0.72 |
| X019923 | BCG_3440C | 187  | 6   | 3  | 3   | 1.00 | 0.97 | 0.98 | 1.28 | 1.42 | 1.03 | 0.76 |
| X019923 | BCG_3441  | 146  | 5   | 3  | 3   | 1.00 | 0.88 | 0.94 | 1.02 | 1.24 | 1.14 | 0.79 |
| X019923 | BCG_3444  | 90   | 9   | 3  | 3   | 1.00 | 1.57 | 1.21 | 1.37 | 1.34 | 0.64 | 0.96 |
| X019923 | BCG_3445  | 813  | 23  | 13 | 17  | 1.00 | 0.86 | 0.91 | 1.09 | 1.16 | 1.16 | 0.77 |
| X019923 | BCG_3447  | 236  | 12  | 5  | 5   | 1.00 | 0.97 | 0.88 | 1.02 | 1.20 | 1.04 | 0.71 |
| X019923 | BCG_3453C | 276  | 9   | 6  | 6   | 1.00 | 0.93 | 0.80 | 1.00 | 0.91 | 1.08 | 0.84 |
| X019923 | BCG_3458C | 727  | 28  | 13 | 22  | 1.00 | 0.86 | 0.90 | 1.05 | 1.19 | 1.17 | 0.69 |
| X019923 | BCG_3459  | 141  | 4   | 3  | 3   | 1.00 | 0.99 | 0.89 | 1.19 | 0.99 | 1.01 | 1.03 |
| X019923 | BCG_3461C | 397  | 8   | 6  | 6   | 1.00 | 0.96 | 0.86 | 1.14 | 1.24 | 1.04 | 0.84 |
| X019923 | BCG_3466C | 385  | 19  | 10 | 12  | 1.00 | 0.88 | 0.92 | 1.03 | 1.16 | 1.14 | 0.82 |
| X019923 | BCG_3469  | 592  | 17  | 10 | 10  | 1.00 | 0.87 | 0.94 | 1.13 | 1.24 | 1.14 | 0.69 |
| X019923 | BCG_3470  | 478  | 15  | 9  | 10  | 1.00 | 0.93 | 0.98 | 1.18 | 1.31 | 1.07 | 0.69 |
| X019923 | BCG_3471  | 1008 | 36  | 15 | 23  | 1.00 | 0.98 | 0.92 | 0.87 | 0.90 | 1.02 | 0.91 |
| X019923 | BCG_3474C | 186  | 9   | 5  | 5   | 1.00 | 0.92 | 0.96 | 1.01 | 1.13 | 1.08 | 0.81 |
| X019923 | BCG_3477  | 46   | 5   | 2  | 2   | 1.00 | 0.91 | 0.78 | 0.92 | 1.07 | 1.10 | 0.87 |
| X019923 | BCG_3479C | 925  | 44  | 19 | 28  | 1.00 | 0.96 | 0.90 | 0.97 | 1.02 | 1.04 | 0.87 |
| X019923 | BCG_3480C | 706  | 26  | 14 | 18  | 1.00 | 0.97 | 0.99 | 1.13 | 1.17 | 1.03 | 0.84 |
| X019923 | BCG_3481C | 2449 | 165 | 36 | 126 | 1.00 | 0.87 | 0.46 | 0.36 | 0.27 | 1.16 | 1.61 |
| X019923 | BCG_3484C | 118  | 5   | 3  | 3   | 1.00 | 0.99 | 0.87 | 1.08 | 1.08 | 1.01 | 0.92 |
| X019923 | BCG_3487C | 2276 | 112 | 35 | 85  | 1.00 | 0.92 | 0.94 | 1.02 | 1.13 | 1.09 | 0.82 |
| X019923 | BCG_3488C | 771  | 115 | 11 | 94  | 1.00 | 0.86 | 0.93 | 1.12 | 1.24 | 1.16 | 0.65 |
| X019923 | BCG_3489C | 194  | 8   | 4  | 4   | 1.00 | 0.79 | 0.92 | 0.90 | 1.17 | 1.27 | 0.70 |
| X019923 | BCG_3493C | 245  | 7   | 6  | 6   | 1.00 | 0.81 | 0.94 | 1.18 | 1.15 | 1.23 | 0.75 |
| X019923 | BCG_3498C | 329  | 11  | 6  | 7   | 1.00 | 0.67 | 0.77 | 0.96 | 0.97 | 1.48 | 0.81 |
| X019923 | BCG_3499C | 303  | 11  | 5  | 8   | 1.00 | 0.93 | 0.96 | 1.02 | 0.87 | 1.08 | 0.78 |
| X019923 | BCG_3501C | 70   | 2   | 2  | 2   | 1.00 | 0.81 | 0.98 | 0.91 | 1.14 | 1.24 | 0.94 |

|         |           |      |     |    |    |      |      |      |      |      |      |      |
|---------|-----------|------|-----|----|----|------|------|------|------|------|------|------|
| X019923 | BCG_3502C | 1328 | 29  | 19 | 20 | 1.00 | 0.86 | 0.86 | 0.99 | 0.99 | 1.16 | 0.88 |
| X019923 | BCG_3503  | 69   | 3   | 2  | 2  | 1.00 | 0.81 | 0.68 | 0.86 | 0.97 | 1.23 | 0.71 |
| X019923 | BCG_3504  | 57   | 3   | 2  | 2  | 1.00 | 0.72 | 0.57 | 1.35 | 0.67 | 1.39 | 0.73 |
| X019923 | BCG_3507C | 617  | 24  | 13 | 16 | 1.00 | 0.90 | 0.98 | 1.14 | 1.20 | 1.11 | 0.80 |
| X019923 | BCG_3508C | 651  | 55  | 13 | 34 | 1.00 | 0.90 | 0.87 | 0.88 | 0.84 | 1.11 | 0.78 |
| X019923 | BCG_3509C | 453  | 35  | 9  | 26 | 1.00 | 0.87 | 0.79 | 0.85 | 0.77 | 1.15 | 0.75 |
| X019923 | BCG_3520C | 324  | 14  | 7  | 9  | 1.00 | 0.96 | 0.98 | 1.13 | 1.23 | 1.04 | 0.82 |
| X019923 | BCG_3521C | 579  | 59  | 14 | 46 | 1.00 | 0.88 | 0.79 | 0.84 | 0.81 | 1.14 | 0.72 |
| X019923 | BCG_3522C | 1615 | 126 | 32 | 87 | 1.00 | 0.86 | 0.78 | 0.85 | 0.82 | 1.17 | 0.77 |
| X019923 | BCG_3523C | 1080 | 104 | 20 | 69 | 1.00 | 0.87 | 0.78 | 0.86 | 0.79 | 1.15 | 0.79 |
| X019923 | BCG_3524C | 417  | 31  | 8  | 21 | 1.00 | 0.88 | 0.78 | 0.82 | 0.82 | 1.14 | 0.68 |
| X019923 | BCG_3525C | 794  | 61  | 16 | 37 | 1.00 | 0.92 | 0.90 | 1.02 | 0.81 | 1.09 | 0.88 |
| X019923 | BCG_3527C | 371  | 14  | 7  | 11 | 1.00 | 0.94 | 0.88 | 0.92 | 1.05 | 1.07 | 0.54 |
| X019923 | BCG_3528  | 311  | 10  | 7  | 8  | 1.00 | 0.84 | 0.90 | 1.11 | 1.14 | 1.19 | 0.87 |
| X019923 | BCG_3529  | 501  | 17  | 10 | 13 | 1.00 | 0.86 | 0.83 | 1.04 | 1.09 | 1.16 | 0.70 |
| X019923 | BCG_3530  | 254  | 9   | 6  | 6  | 1.00 | 0.91 | 1.09 | 1.40 | 1.27 | 1.10 | 0.81 |
| X019923 | BCG_3542  | 52   | 3   | 2  | 2  | 1.00 | 0.77 | 1.14 | 1.07 | 1.02 | 1.30 | 0.88 |
| X019923 | BCG_3544C | 129  | 6   | 3  | 3  | 1.00 | 0.82 | 0.82 | 0.88 | 0.92 | 1.23 | 0.80 |
| X019923 | BCG_3545C | 69   | 2   | 2  | 2  | 1.00 | 0.82 | 0.99 | 1.10 | 1.20 | 1.22 | 1.00 |
| X019923 | BCG_3547C | 143  | 4   | 3  | 3  | 1.00 | 0.87 | 0.88 | 1.18 | 1.16 | 1.15 | 1.14 |
| X019923 | BCG_3548  | 41   | 3   | 2  | 3  | 1.00 | 0.93 | 0.67 | 0.90 | 0.78 | 1.07 | 0.94 |
| X019923 | BCG_3549C | 452  | 15  | 8  | 12 | 1.00 | 0.83 | 0.86 | 1.03 | 1.12 | 1.21 | 0.73 |
| X019923 | BCG_3554  | 427  | 17  | 8  | 10 | 1.00 | 0.95 | 1.00 | 1.21 | 1.33 | 1.05 | 0.95 |
| X019923 | BCG_3556C | 145  | 8   | 2  | 2  | 1.00 | 0.97 | 0.79 | 0.78 | 0.88 | 1.03 | 0.77 |
| X019923 | BCG_3557C | 310  | 9   | 6  | 8  | 1.00 | 0.86 | 0.78 | 0.97 | 0.85 | 1.17 | 0.81 |
| X019923 | BCG_3558C | 82   | 7   | 3  | 3  | 1.00 | 0.82 | 0.91 | 1.20 | 0.87 | 1.21 | 0.94 |
| X019923 | BCG_3559C | 229  | 5   | 4  | 4  | 1.00 | 0.88 | 0.80 | 0.76 | 0.76 | 1.13 | 0.82 |
| X019923 | BCG_3560C | 189  | 11  | 3  | 4  | 1.00 | 0.84 | 0.85 | 1.00 | 0.92 | 1.19 | 0.83 |
| X019923 | BCG_3561C | 469  | 14  | 10 | 11 | 1.00 | 0.90 | 0.76 | 0.85 | 0.78 | 1.11 | 0.90 |
| X019923 | BCG_3562C | 153  | 6   | 4  | 4  | 1.00 | 0.99 | 0.91 | 0.99 | 0.97 | 1.01 | 1.15 |
| X019923 | BCG_3563C | 146  | 6   | 3  | 3  | 1.00 | 0.83 | 0.93 | 0.76 | 0.88 | 1.20 | 0.92 |
| X019923 | BCG_3565C | 80   | 2   | 2  | 2  | 1.00 | 0.76 | 0.86 | 1.11 | 0.99 | 1.32 | 0.81 |
| X019923 | BCG_3566C | 257  | 8   | 4  | 5  | 1.00 | 1.06 | 1.13 | 1.07 | 1.35 | 0.94 | 0.76 |
| X019923 | BCG_3568  | 163  | 8   | 3  | 3  | 1.00 | 1.22 | 1.03 | 1.37 | 1.34 | 0.82 | 1.10 |
| X019923 | BCG_3569  | 116  | 4   | 3  | 3  | 1.00 | 0.83 | 0.95 | 0.95 | 1.05 | 1.21 | 0.81 |
| X019923 | BCG_3573C | 959  | 30  | 16 | 24 | 1.00 | 0.85 | 0.97 | 1.08 | 1.19 | 1.17 | 0.73 |
| X019923 | BCG_3574C | 113  | 4   | 3  | 3  | 1.00 | 0.69 | 0.91 | 0.87 | 0.96 | 1.45 | 0.64 |
| X019923 | BCG_3578C | 126  | 7   | 3  | 3  | 1.00 | 0.85 | 1.05 | 1.14 | 1.30 | 1.18 | 0.67 |
| X019923 | BCG_3579  | 221  | 9   | 5  | 5  | 1.00 | 0.87 | 0.98 | 1.16 | 1.33 | 1.15 | 0.82 |

|         |           |      |    |    |    |      |      |      |      |      |      |       |
|---------|-----------|------|----|----|----|------|------|------|------|------|------|-------|
| X019923 | BCG_3583  | 624  | 35 | 15 | 24 | 1.00 | 0.86 | 0.95 | 1.19 | 1.18 | 1.16 | 0.76  |
| X019923 | BCG_3584C | 315  | 15 | 4  | 7  | 1.00 | 1.06 | 1.01 | 1.08 | 1.37 | 0.95 | 0.90  |
| X019923 | BCG_3586  | 159  | 7  | 4  | 4  | 1.00 | 0.79 | 0.87 | 1.01 | 1.04 | 1.27 | 0.77  |
| X019923 | BCG_3587  | 310  | 9  | 7  | 7  | 1.00 | 0.93 | 0.96 | 1.15 | 1.27 | 1.07 | 0.89  |
| X019923 | BCG_3590  | 217  | 9  | 5  | 5  | 1.00 | 0.99 | 0.83 | 0.94 | 1.05 | 1.01 | 0.95  |
| X019923 | BCG_3592C | 352  | 12 | 8  | 8  | 1.00 | 0.90 | 0.84 | 0.92 | 1.02 | 1.11 | 0.73  |
| X019923 | BCG_3598C | 98   | 5  | 3  | 4  | 1.00 | 0.99 | 0.99 | 1.29 | 1.27 | 1.01 | 0.88  |
| X019923 | BCG_3599C | 307  | 9  | 5  | 6  | 1.00 | 0.80 | 0.91 | 0.99 | 1.04 | 1.24 | 0.76  |
| X019923 | BCG_3600C | 296  | 10 | 6  | 8  | 1.00 | 0.95 | 0.89 | 1.21 | 1.17 | 1.05 | 0.81  |
| X019923 | BCG_3601  | 341  | 18 | 8  | 9  | 1.00 | 1.00 | 1.07 | 1.12 | 1.26 | 1.00 | 0.89  |
| X019923 | BCG_3610  | 106  | 5  | 2  | 2  | 1.00 | 0.81 | 0.67 | 1.03 | 1.12 | 1.23 | 0.46  |
| X019923 | BCG_3611  | 414  | 19 | 9  | 11 | 1.00 | 0.88 | 0.99 | 1.16 | 1.39 | 1.14 | 0.73  |
| X019923 | BCG_3612C | 189  | 7  | 3  | 3  | 1.00 | 0.92 | 0.75 | 0.95 | 1.11 | 1.08 | 0.71  |
| X019923 | BCG_3613C | 96   | 6  | 2  | 2  | 1.00 | 0.90 | 0.87 | 1.04 | 1.02 | 1.11 | 1.20  |
| X019923 | BCG_3614  | 196  | 4  | 4  | 4  | 1.00 | 1.02 | 0.95 | 1.04 | 1.19 | 0.98 | 0.85  |
| X019923 | BCG_3617  | 332  | 11 | 8  | 9  | 1.00 | 0.84 | 0.82 | 0.96 | 1.00 | 1.19 | 0.79  |
| X019923 | BCG_3618  | 473  | 21 | 9  | 11 | 1.00 | 0.96 | 0.82 | 0.80 | 0.82 | 1.04 | 0.85  |
| X019923 | BCG_3620C | 349  | 14 | 7  | 7  | 1.00 | 0.93 | 1.03 | 1.09 | 1.27 | 1.08 | 0.72  |
| X019923 | BCG_3621C | 110  | 5  | 3  | 3  | 1.00 | 0.89 | 0.98 | 1.46 | 1.16 | 1.12 | 0.93  |
| X019923 | BCG_3627  | 112  | 4  | 2  | 2  | 1.00 | 1.06 | 1.15 | 1.30 | 1.13 | 0.94 | 0.92  |
| X019923 | BCG_3630C | 260  | 5  | 5  | 5  | 1.00 | 0.97 | 1.02 | 1.00 | 1.09 | 1.03 | 0.89  |
| X019923 | BCG_3633C | 1010 | 56 | 23 | 41 | 1.00 | 0.67 | 0.88 | 0.79 | 0.95 | 1.49 | 11.30 |
| X019923 | BCG_3634C | 401  | 12 | 10 | 10 | 1.00 | 0.86 | 1.02 | 1.03 | 1.36 | 1.16 | 0.78  |
| X019923 | BCG_3635C | 690  | 21 | 12 | 16 | 1.00 | 0.92 | 0.98 | 1.18 | 1.30 | 1.08 | 0.90  |
| X019923 | BCG_3636  | 98   | 3  | 3  | 3  | 1.00 | 1.08 | 1.13 | 1.41 | 1.38 | 0.93 | 0.93  |
| X019923 | BCG_3638C | 99   | 7  | 3  | 3  | 1.00 | 0.99 | 0.88 | 0.97 | 1.02 | 1.01 | 0.85  |
| X019923 | BCG_3640C | 402  | 14 | 10 | 11 | 1.00 | 0.94 | 0.89 | 0.98 | 1.16 | 1.07 | 0.98  |
| X019923 | BCG_3641  | 124  | 5  | 2  | 2  | 1.00 | 0.96 | 0.90 | 1.00 | 1.02 | 1.05 | 1.10  |
| X019923 | BCG_3644C | 249  | 7  | 5  | 5  | 1.00 | 0.92 | 0.93 | 1.05 | 0.91 | 1.09 | 0.78  |
| X019923 | BCG_3645C | 525  | 17 | 12 | 12 | 1.00 | 0.86 | 0.98 | 1.14 | 1.28 | 1.17 | 0.80  |
| X019923 | BCG_3646C | 185  | 5  | 4  | 4  | 1.00 | 1.02 | 0.96 | 1.14 | 1.03 | 0.98 | 1.00  |
| X019923 | BCG_3647C | 387  | 11 | 8  | 8  | 1.00 | 0.97 | 0.99 | 1.16 | 1.10 | 1.03 | 0.85  |
| X019923 | BCG_3648C | 574  | 23 | 11 | 15 | 1.00 | 0.87 | 1.01 | 1.26 | 1.29 | 1.15 | 0.71  |
| X019923 | BCG_3649  | 487  | 15 | 6  | 10 | 1.00 | 0.92 | 0.99 | 1.06 | 1.26 | 1.09 | 0.97  |
| X019923 | BCG_3651  | 343  | 10 | 6  | 6  | 1.00 | 0.85 | 0.91 | 1.08 | 1.08 | 1.18 | 0.75  |
| X019923 | BCG_3652C | 336  | 9  | 7  | 7  | 1.00 | 0.96 | 0.86 | 1.05 | 1.22 | 1.04 | 0.95  |
| X019923 | BCG_3653C | 323  | 11 | 6  | 6  | 1.00 | 0.85 | 0.86 | 1.06 | 1.12 | 1.18 | 0.60  |
| X019923 | BCG_3656C | 86   | 3  | 3  | 3  | 1.00 | 0.57 | 1.02 | 1.22 | 1.06 | 1.76 | 0.66  |
| X019923 | BCG_3657  | 147  | 11 | 2  | 7  | 1.00 | 0.89 | 0.92 | 1.08 | 1.18 | 1.12 | 0.71  |

|         |           |      |    |    |    |      |      |      |      |      |      |      |
|---------|-----------|------|----|----|----|------|------|------|------|------|------|------|
| X019923 | BCG_3661C | 2288 | 83 | 37 | 53 | 1.00 | 1.01 | 0.91 | 0.83 | 1.03 | 0.99 | 1.00 |
| X019923 | BCG_3662C | 311  | 15 | 6  | 13 | 1.00 | 0.86 | 0.77 | 0.93 | 1.11 | 1.16 | 0.56 |
| X019923 | BCG_3663C | 808  | 23 | 18 | 18 | 1.00 | 0.94 | 0.94 | 1.12 | 1.31 | 1.07 | 0.81 |
| X019923 | BCG_3664C | 213  | 8  | 5  | 7  | 1.00 | 1.04 | 1.04 | 1.23 | 1.20 | 0.96 | 0.89 |
| X019923 | BCG_3666C | 253  | 8  | 7  | 7  | 1.00 | 0.94 | 1.14 | 1.25 | 1.35 | 1.06 | 0.81 |
| X019923 | BCG_3667C | 144  | 4  | 2  | 2  | 1.00 | 1.07 | 1.00 | 0.84 | 0.96 | 0.93 | 0.70 |
| X019923 | BCG_3668C | 455  | 12 | 9  | 10 | 1.00 | 0.95 | 0.90 | 0.94 | 0.94 | 1.05 | 0.72 |
| X019923 | BCG_3670C | 174  | 5  | 3  | 4  | 1.00 | 0.93 | 0.89 | 0.93 | 0.92 | 1.07 | 0.62 |
| X019923 | BCG_3671C | 167  | 5  | 3  | 5  | 1.00 | 1.02 | 0.97 | 1.12 | 1.12 | 0.98 | 0.91 |
| X019923 | BCG_3672C | 186  | 6  | 5  | 5  | 1.00 | 0.96 | 0.91 | 1.19 | 1.18 | 1.04 | 0.72 |
| X019923 | BCG_3673C | 379  | 13 | 8  | 8  | 1.00 | 0.85 | 0.94 | 1.02 | 1.31 | 1.18 | 0.72 |
| X019923 | BCG_3674C | 987  | 29 | 19 | 21 | 1.00 | 0.89 | 0.78 | 0.87 | 0.66 | 1.13 | 0.88 |
| X019923 | BCG_3678C | 213  | 9  | 4  | 8  | 1.00 | 0.83 | 0.96 | 1.07 | 1.10 | 1.20 | 0.86 |
| X019923 | BCG_3679C | 91   | 3  | 2  | 2  | 1.00 | 0.82 | 0.78 | 0.94 | 0.89 | 1.22 | 0.77 |
| X019923 | BCG_3680C | 327  | 9  | 5  | 6  | 1.00 | 1.01 | 1.05 | 1.15 | 1.15 | 0.99 | 1.02 |
| X019923 | BCG_3682C | 328  | 7  | 5  | 5  | 1.00 | 0.77 | 0.85 | 1.15 | 1.15 | 1.30 | 0.81 |
| X019923 | BCG_3684C | 379  | 15 | 11 | 11 | 1.00 | 0.79 | 0.73 | 0.96 | 0.87 | 1.26 | 0.83 |
| X019923 | BCG_3685C | 493  | 12 | 8  | 8  | 1.00 | 0.99 | 0.88 | 1.05 | 1.05 | 1.01 | 1.03 |
| X019923 | BCG_3686  | 458  | 21 | 8  | 14 | 1.00 | 0.85 | 0.87 | 1.01 | 1.22 | 1.18 | 0.66 |
| X019923 | BCG_3689  | 340  | 9  | 5  | 5  | 1.00 | 1.00 | 0.78 | 1.05 | 1.05 | 1.00 | 0.82 |
| X019923 | BCG_3690  | 81   | 3  | 2  | 2  | 1.00 | 0.78 | 0.79 | 0.81 | 0.99 | 1.28 | 1.02 |
| X019923 | BCG_3691  | 114  | 2  | 2  | 2  | 1.00 | 0.81 | 0.82 | 1.03 | 1.30 | 1.23 | 0.85 |
| X019923 | BCG_3692C | 459  | 12 | 9  | 11 | 1.00 | 0.93 | 0.95 | 1.06 | 1.25 | 1.08 | 0.90 |
| X019923 | BCG_3693  | 124  | 3  | 2  | 2  | 1.00 | 0.93 | 0.93 | 1.15 | 0.51 | 1.07 | 1.68 |
| X019923 | BCG_3702C | 201  | 8  | 3  | 3  | 1.00 | 1.14 | 1.06 | 1.05 | 1.36 | 0.88 | 1.18 |
| X019923 | BCG_3703  | 558  | 18 | 9  | 11 | 1.00 | 0.82 | 0.89 | 0.97 | 0.93 | 1.22 | 0.93 |
| X019923 | BCG_3704C | 2586 | 91 | 44 | 65 | 1.00 | 0.92 | 0.82 | 0.79 | 0.83 | 1.09 | 0.89 |
| X019923 | BCG_3705C | 163  | 5  | 4  | 4  | 1.00 | 0.86 | 0.67 | 0.74 | 0.84 | 1.16 | 0.59 |
| X019923 | BCG_3706C | 189  | 19 | 5  | 18 | 1.00 | 0.85 | 0.85 | 0.92 | 0.94 | 1.18 | 0.52 |
| X019923 | BCG_3709  | 296  | 9  | 6  | 6  | 1.00 | 0.94 | 1.03 | 1.15 | 1.31 | 1.07 | 0.80 |
| X019923 | BCG_3719  | 281  | 11 | 5  | 9  | 1.00 | 0.84 | 1.00 | 1.09 | 1.15 | 1.19 | 0.86 |
| X019923 | BCG_3720C | 55   | 3  | 2  | 2  | 1.00 | 1.53 | 1.44 | 1.85 | 1.51 | 0.65 | 1.16 |
| X019923 | BCG_3721C | 217  | 6  | 3  | 3  | 1.00 | 0.92 | 0.88 | 1.12 | 1.08 | 1.09 | 0.93 |
| X019923 | BCG_3724C | 68   | 3  | 2  | 2  | 1.00 | 1.09 | 1.28 | 1.17 | 1.47 | 0.92 | 1.01 |
| X019923 | BCG_3725  | 668  | 20 | 13 | 13 | 1.00 | 0.99 | 1.06 | 1.65 | 1.20 | 1.01 | 0.91 |
| X019923 | BCG_3727  | 211  | 10 | 5  | 8  | 1.00 | 0.92 | 0.95 | 0.97 | 1.00 | 1.09 | 0.97 |
| X019923 | BCG_3728  | 202  | 10 | 5  | 6  | 1.00 | 0.88 | 0.79 | 0.82 | 0.86 | 1.14 | 0.78 |
| X019923 | BCG_3729C | 306  | 10 | 5  | 7  | 1.00 | 0.91 | 0.95 | 0.96 | 1.15 | 1.10 | 1.03 |
| X019923 | BCG_3730C | 142  | 5  | 4  | 5  | 1.00 | 0.91 | 0.97 | 1.04 | 1.01 | 1.10 | 0.74 |

|         |           |      |    |    |    |      |      |      |      |      |      |      |
|---------|-----------|------|----|----|----|------|------|------|------|------|------|------|
| X019923 | BCG_3732C | 165  | 5  | 3  | 3  | 1.00 | 0.86 | 0.75 | 0.89 | 1.19 | 1.16 | 0.62 |
| X019923 | BCG_3734  | 743  | 32 | 13 | 18 | 1.00 | 0.83 | 0.78 | 0.95 | 1.14 | 1.20 | 0.70 |
| X019923 | BCG_3736C | 210  | 4  | 3  | 3  | 1.00 | 0.86 | 0.91 | 1.05 | 1.25 | 1.17 | 0.58 |
| X019923 | BCG_3738  | 503  | 14 | 11 | 13 | 1.00 | 0.86 | 0.91 | 0.98 | 1.17 | 1.16 | 0.77 |
| X019923 | BCG_3739  | 719  | 21 | 10 | 11 | 1.00 | 0.91 | 0.91 | 1.08 | 1.23 | 1.10 | 0.89 |
| X019923 | BCG_3741  | 1059 | 31 | 20 | 24 | 1.00 | 0.94 | 0.88 | 0.96 | 0.89 | 1.06 | 0.91 |
| X019923 | BCG_3742  | 610  | 17 | 11 | 14 | 1.00 | 0.89 | 0.92 | 1.09 | 1.23 | 1.12 | 0.82 |
| X019923 | BCG_3743  | 599  | 19 | 10 | 14 | 1.00 | 1.00 | 0.94 | 1.09 | 1.10 | 1.00 | 0.98 |
| X019923 | BCG_3747C | 317  | 15 | 5  | 6  | 1.00 | 0.86 | 0.90 | 1.01 | 1.04 | 1.17 | 0.69 |
| X019923 | BCG_3749  | 114  | 3  | 2  | 2  | 1.00 | 1.06 | 0.98 | 1.46 | 1.18 | 0.95 | 1.12 |
| X019923 | BCG_3750  | 318  | 9  | 7  | 8  | 1.00 | 0.99 | 0.79 | 0.96 | 0.93 | 1.01 | 1.13 |
| X019923 | BCG_3751  | 814  | 21 | 13 | 16 | 1.00 | 0.90 | 0.96 | 1.11 | 1.26 | 1.11 | 0.79 |
| X019923 | BCG_3752  | 740  | 21 | 14 | 15 | 1.00 | 0.85 | 0.82 | 0.90 | 0.83 | 1.18 | 1.03 |
| X019923 | BCG_3753C | 74   | 4  | 3  | 3  | 1.00 | 0.87 | 0.74 | 0.99 | 0.90 | 1.15 | 0.93 |
| X019923 | BCG_3754  | 288  | 10 | 4  | 5  | 1.00 | 1.02 | 1.18 | 1.12 | 1.19 | 0.98 | 1.41 |
| X019923 | BCG_3755C | 627  | 21 | 12 | 15 | 1.00 | 0.87 | 0.95 | 1.02 | 1.21 | 1.15 | 0.81 |
| X019923 | BCG_3758  | 118  | 3  | 2  | 2  | 1.00 | 0.88 | 0.88 | 0.89 | 1.00 | 1.14 | 0.79 |
| X019923 | BCG_3759C | 76   | 3  | 3  | 3  | 1.00 | 0.68 | 0.86 | 1.52 | 1.21 | 1.48 | 0.57 |
| X019923 | BCG_3760C | 136  | 9  | 3  | 3  | 1.00 | 0.71 | 0.77 | 0.93 | 0.82 | 1.42 | 0.78 |
| X019923 | BCG_3768C | 518  | 14 | 10 | 12 | 1.00 | 0.85 | 0.97 | 1.09 | 1.22 | 1.18 | 0.73 |
| X019923 | BCG_3769C | 959  | 34 | 19 | 26 | 1.00 | 0.90 | 0.90 | 1.03 | 1.09 | 1.11 | 0.84 |
| X019923 | BCG_3770  | 1144 | 42 | 21 | 28 | 1.00 | 0.87 | 0.80 | 0.82 | 0.78 | 1.16 | 0.93 |
| X019923 | BCG_3772  | 102  | 4  | 3  | 3  | 1.00 | 0.88 | 0.92 | 1.04 | 1.05 | 1.14 | 0.74 |
| X019923 | BCG_3773  | 277  | 7  | 5  | 6  | 1.00 | 0.91 | 1.01 | 1.08 | 1.15 | 1.10 | 0.76 |
| X019923 | BCG_3774C | 69   | 5  | 2  | 2  | 1.00 | 1.15 | 1.67 | 1.83 | 1.55 | 0.87 | 1.40 |
| X019923 | BCG_3775C | 106  | 3  | 3  | 3  | 1.00 | 0.93 | 1.00 | 0.97 | 1.32 | 1.08 | 0.69 |
| X019923 | BCG_3776C | 172  | 9  | 3  | 4  | 1.00 | 0.83 | 0.94 | 1.00 | 1.18 | 1.20 | 0.60 |
| X019923 | BCG_3778C | 364  | 12 | 5  | 8  | 1.00 | 0.79 | 0.80 | 0.90 | 1.05 | 1.26 | 0.61 |
| X019923 | BCG_3779  | 340  | 12 | 8  | 8  | 1.00 | 0.85 | 0.99 | 1.11 | 1.30 | 1.18 | 0.90 |
| X019923 | BCG_3780  | 1116 | 40 | 16 | 25 | 1.00 | 0.87 | 0.89 | 1.13 | 1.19 | 1.15 | 0.73 |
| X019923 | BCG_3781C | 397  | 16 | 9  | 9  | 1.00 | 0.97 | 1.07 | 1.20 | 1.22 | 1.03 | 0.82 |
| X019923 | BCG_3782C | 857  | 28 | 15 | 20 | 1.00 | 0.89 | 0.91 | 1.10 | 1.26 | 1.13 | 0.73 |
| X019923 | BCG_3784  | 161  | 6  | 2  | 3  | 1.00 | 0.78 | 0.82 | 0.90 | 0.88 | 1.28 | 0.91 |
| X019923 | BCG_3785  | 368  | 12 | 8  | 9  | 1.00 | 0.83 | 0.93 | 1.09 | 1.19 | 1.21 | 0.82 |
| X019923 | BCG_3786  | 129  | 4  | 3  | 3  | 1.00 | 0.84 | 0.86 | 1.07 | 0.99 | 1.19 | 0.70 |
| X019923 | BCG_3790C | 210  | 8  | 3  | 3  | 1.00 | 0.67 | 0.64 | 0.98 | 1.33 | 1.50 | 0.83 |
| X019923 | BCG_3792  | 406  | 9  | 8  | 8  | 1.00 | 0.86 | 0.91 | 0.93 | 0.96 | 1.16 | 0.91 |
| X019923 | BCG_3794C | 596  | 22 | 12 | 17 | 1.00 | 0.84 | 0.85 | 1.00 | 1.04 | 1.20 | 0.83 |
| X019923 | BCG_3797  | 53   | 3  | 2  | 2  | 1.00 | 0.71 | 0.80 | 0.85 | 1.03 | 1.41 | 0.89 |



|         |           |      |     |    |    |      |      |      |      |      |      |      |
|---------|-----------|------|-----|----|----|------|------|------|------|------|------|------|
| X019923 | BCG_3806  | 253  | 9   | 5  | 6  | 1.00 | 0.88 | 0.89 | 1.01 | 1.20 | 1.13 | 0.63 |
| X019923 | BCG_3807  | 102  | 3   | 2  | 2  | 1.00 | 0.86 | 1.08 | 1.24 | 1.13 | 1.16 | 0.86 |
| X019923 | BCG_3811C | 705  | 30  | 11 | 20 | 1.00 | 0.76 | 0.75 | 0.80 | 0.71 | 1.31 | 0.63 |
| X019923 | BCG_3812C | 74   | 3   | 2  | 2  | 1.00 | 1.27 | 1.09 | 1.21 | 1.15 | 0.79 | 0.77 |
| X019923 | BCG_3813  | 344  | 9   | 7  | 7  | 1.00 | 0.87 | 0.88 | 1.14 | 1.10 | 1.15 | 0.79 |
| X019923 | BCG_3817C | 332  | 12  | 7  | 7  | 1.00 | 0.92 | 0.93 | 1.12 | 1.09 | 1.09 | 0.98 |
| X019923 | BCG_3820C | 892  | 24  | 13 | 19 | 1.00 | 0.92 | 0.89 | 1.06 | 1.10 | 1.08 | 0.86 |
| X019923 | BCG_3822  | 92   | 6   | 2  | 5  | 1.00 | 0.83 | 0.83 | 0.96 | 1.19 | 1.20 | 0.76 |
| X019923 | BCG_3824C | 177  | 6   | 4  | 5  | 1.00 | 0.90 | 0.80 | 0.97 | 1.10 | 1.11 | 0.69 |
| X019923 | BCG_3826C | 64   | 2   | 2  | 2  | 1.00 | 0.84 | 1.26 | 1.10 | 1.32 | 1.20 | 0.72 |
| X019923 | BCG_3833  | 409  | 15  | 10 | 12 | 1.00 | 0.96 | 1.10 | 1.14 | 1.22 | 1.04 | 0.67 |
| X019923 | BCG_3836  | 759  | 32  | 15 | 20 | 1.00 | 0.85 | 0.93 | 1.05 | 1.16 | 1.18 | 0.82 |
| X019923 | BCG_3837  | 450  | 21  | 11 | 13 | 1.00 | 0.81 | 0.89 | 1.11 | 1.20 | 1.23 | 0.69 |
| X019923 | BCG_3839  | 164  | 5   | 4  | 4  | 1.00 | 1.01 | 1.04 | 1.31 | 1.44 | 0.99 | 0.85 |
| X019923 | BCG_3840C | 446  | 10  | 6  | 7  | 1.00 | 0.99 | 1.02 | 1.12 | 1.34 | 1.01 | 0.90 |
| X019923 | BCG_3841  | 206  | 7   | 6  | 6  | 1.00 | 0.88 | 0.83 | 1.00 | 0.95 | 1.14 | 1.06 |
| X019923 | BCG_3842  | 451  | 18  | 10 | 15 | 1.00 | 0.85 | 0.92 | 1.01 | 0.95 | 1.18 | 0.70 |
| X019923 | BCG_3843  | 454  | 11  | 7  | 7  | 1.00 | 0.88 | 0.82 | 0.89 | 1.00 | 1.14 | 0.87 |
| X019923 | BCG_3844  | 721  | 23  | 11 | 14 | 1.00 | 0.92 | 0.82 | 0.95 | 0.91 | 1.09 | 0.87 |
| X019923 | BCG_3845  | 163  | 6   | 3  | 3  | 1.00 | 0.47 | 0.53 | 0.63 | 1.51 | 2.12 | 0.57 |
| X019923 | BCG_3850  | 278  | 9   | 8  | 9  | 1.00 | 0.95 | 0.97 | 1.16 | 1.00 | 1.05 | 0.70 |
| X019923 | BCG_3852  | 573  | 23  | 12 | 15 | 1.00 | 0.86 | 0.96 | 1.06 | 1.29 | 1.16 | 0.82 |
| X019923 | BCG_3853  | 681  | 31  | 11 | 23 | 1.00 | 0.91 | 0.88 | 1.05 | 1.20 | 1.10 | 0.91 |
| X019923 | BCG_3854  | 246  | 11  | 7  | 8  | 1.00 | 0.88 | 0.88 | 0.99 | 0.98 | 1.13 | 1.00 |
| X019923 | BCG_3855  | 739  | 25  | 17 | 17 | 1.00 | 0.83 | 0.77 | 0.76 | 0.76 | 1.20 | 0.99 |
| X019923 | BCG_3856  | 787  | 25  | 16 | 18 | 1.00 | 0.82 | 0.85 | 0.82 | 0.77 | 1.22 | 1.34 |
| X019923 | BCG_3857  | 731  | 24  | 17 | 23 | 1.00 | 0.95 | 0.77 | 0.70 | 0.75 | 1.06 | 1.15 |
| X019923 | BCG_3859  | 97   | 7   | 3  | 3  | 1.00 | 1.14 | 1.06 | 1.18 | 1.32 | 0.88 | 0.92 |
| X019923 | BCG_3861C | 1621 | 108 | 26 | 78 | 1.00 | 0.86 | 0.87 | 0.88 | 0.82 | 1.17 | 0.69 |
| X019923 | BCG_3862C | 2446 | 95  | 49 | 65 | 1.00 | 0.81 | 0.75 | 0.78 | 0.72 | 1.24 | 0.99 |
| X019923 | BCG_3863C | 1744 | 56  | 29 | 47 | 1.00 | 0.89 | 0.92 | 1.03 | 1.10 | 1.13 | 0.85 |
| X019923 | BCG_3864C | 201  | 15  | 4  | 7  | 1.00 | 0.84 | 0.85 | 0.83 | 0.81 | 1.20 | 0.93 |
| X019923 | BCG_3866C | 346  | 18  | 8  | 11 | 1.00 | 0.80 | 0.93 | 1.08 | 1.20 | 1.25 | 0.65 |
| X019923 | BCG_3867C | 513  | 17  | 9  | 14 | 1.00 | 0.84 | 0.82 | 0.97 | 0.76 | 1.18 | 0.92 |
| X019923 | BCG_3868C | 338  | 14  | 6  | 9  | 1.00 | 0.84 | 0.91 | 1.01 | 1.02 | 1.19 | 0.96 |
| X019923 | BCG_3870C | 728  | 34  | 14 | 19 | 1.00 | 0.89 | 0.88 | 1.02 | 1.04 | 1.12 | 0.90 |
| X019923 | BCG_3871C | 495  | 13  | 10 | 10 | 1.00 | 0.96 | 0.98 | 1.17 | 1.34 | 1.04 | 0.84 |
| X019923 | BCG_3876C | 398  | 13  | 10 | 11 | 1.00 | 0.95 | 0.77 | 0.82 | 0.93 | 1.06 | 0.60 |
| X019923 | BCG_3877C | 462  | 13  | 8  | 9  | 1.00 | 0.90 | 0.85 | 0.97 | 1.04 | 1.11 | 0.80 |

|         |           |      |    |    |    |      |      |      |      |      |      |      |
|---------|-----------|------|----|----|----|------|------|------|------|------|------|------|
| X019923 | BCG_3878C | 682  | 30 | 11 | 20 | 1.00 | 0.86 | 0.82 | 0.91 | 0.94 | 1.16 | 0.80 |
| X019923 | BCG_3879  | 1142 | 53 | 16 | 35 | 1.00 | 0.83 | 0.89 | 0.89 | 0.88 | 1.21 | 0.65 |
| X019923 | BCG_3880  | 441  | 17 | 10 | 12 | 1.00 | 0.93 | 1.01 | 1.17 | 1.32 | 1.08 | 0.81 |
| X019923 | BCG_3881  | 565  | 35 | 13 | 27 | 1.00 | 0.91 | 0.88 | 1.07 | 1.09 | 1.09 | 0.50 |
| X019923 | BCG_3887C | 292  | 8  | 7  | 7  | 1.00 | 0.92 | 0.95 | 1.15 | 1.13 | 1.08 | 0.92 |
| X019923 | BCG_3888C | 270  | 20 | 6  | 6  | 1.00 | 0.97 | 0.80 | 1.01 | 0.81 | 1.03 | 1.11 |
| X019923 | BCG_3889  | 158  | 14 | 3  | 4  | 1.00 | 0.80 | 0.80 | 1.01 | 1.19 | 1.24 | 0.93 |
| X019923 | BCG_3897C | 612  | 18 | 12 | 15 | 1.00 | 0.92 | 0.98 | 1.12 | 1.32 | 1.09 | 0.89 |
| X019923 | BCG_3900C | 234  | 5  | 4  | 4  | 1.00 | 0.82 | 0.93 | 1.11 | 1.21 | 1.21 | 0.73 |
| X019923 | BCG_3901C | 567  | 14 | 7  | 9  | 1.00 | 0.90 | 0.95 | 1.05 | 1.14 | 1.11 | 0.82 |
| X019923 | BCG_3904  | 591  | 38 | 9  | 28 | 1.00 | 0.90 | 0.80 | 0.83 | 0.84 | 1.12 | 0.84 |
| X019923 | BCG_3905C | 233  | 10 | 6  | 7  | 1.00 | 0.97 | 0.95 | 0.99 | 0.92 | 1.03 | 0.94 |
| X019923 | BCG_3906C | 433  | 19 | 9  | 12 | 1.00 | 0.69 | 0.68 | 0.69 | 0.66 | 1.45 | 0.81 |
| X019923 | BCG_3909  | 451  | 23 | 8  | 20 | 1.00 | 0.80 | 0.78 | 1.00 | 1.09 | 1.24 | 0.76 |
| X019923 | BCG_3912  | 360  | 16 | 9  | 11 | 1.00 | 0.96 | 0.97 | 1.13 | 1.28 | 1.05 | 0.75 |
| X019923 | BCG_3913  | 217  | 8  | 5  | 5  | 1.00 | 0.74 | 0.70 | 0.83 | 0.81 | 1.36 | 0.83 |
| X019923 | BCG_3915  | 252  | 12 | 3  | 9  | 1.00 | 0.95 | 0.84 | 1.01 | 1.02 | 1.05 | 0.70 |
| X019923 | BCG_3916  | 250  | 8  | 7  | 8  | 1.00 | 0.84 | 0.90 | 1.10 | 1.21 | 1.19 | 0.64 |
| X019923 | BCG_3917C | 232  | 11 | 7  | 7  | 1.00 | 0.96 | 0.85 | 1.08 | 1.05 | 1.04 | 0.91 |
| X019923 | BCG_3919C | 179  | 5  | 2  | 2  | 1.00 | 0.81 | 1.03 | 0.99 | 1.22 | 1.23 | 0.81 |
| X019923 | BCG_3921C | 678  | 22 | 13 | 16 | 1.00 | 0.94 | 0.97 | 1.12 | 1.20 | 1.06 | 0.88 |
| X019923 | BCG_3922C | 2010 | 62 | 34 | 39 | 1.00 | 0.85 | 0.82 | 0.85 | 0.92 | 1.18 | 0.96 |
| X019923 | BCG_3926  | 286  | 12 | 7  | 7  | 1.00 | 0.87 | 0.88 | 0.99 | 1.20 | 1.15 | 0.70 |
| X019923 | BCG_3927  | 262  | 13 | 5  | 9  | 1.00 | 0.86 | 0.91 | 0.99 | 1.11 | 1.16 | 0.78 |
| X019923 | BCG_3928  | 377  | 6  | 6  | 6  | 1.00 | 0.94 | 1.02 | 1.08 | 1.17 | 1.06 | 0.70 |
| X019923 | BCG_3929  | 72   | 4  | 2  | 2  | 1.00 | 0.99 | 1.29 | 1.15 | 1.28 | 1.01 | 0.87 |
| X019923 | BCG_3930  | 194  | 4  | 3  | 4  | 1.00 | 0.87 | 0.83 | 1.29 | 1.07 | 1.15 | 0.68 |
| X019923 | BCG_3931  | 1131 | 34 | 20 | 28 | 1.00 | 0.90 | 0.98 | 1.18 | 1.24 | 1.11 | 0.81 |
| X019923 | BCG_3932  | 223  | 9  | 5  | 5  | 1.00 | 0.98 | 0.97 | 1.10 | 1.16 | 1.02 | 1.18 |
| X019923 | BCG_3934  | 115  | 6  | 3  | 3  | 1.00 | 0.61 | 0.95 | 1.03 | 0.86 | 1.63 | 0.64 |
| X019923 | BCG_3935C | 358  | 15 | 7  | 12 | 1.00 | 0.87 | 0.87 | 1.02 | 1.10 | 1.15 | 0.66 |
| X019923 | BCG_3936C | 576  | 19 | 11 | 17 | 1.00 | 0.87 | 0.85 | 0.99 | 1.03 | 1.15 | 0.71 |
| X019923 | BCG_3937C | 249  | 12 | 6  | 6  | 1.00 | 0.99 | 0.76 | 1.27 | 1.31 | 1.01 | 0.99 |
| X019923 | BCG_3941C | 75   | 3  | 2  | 2  | 1.00 | 0.89 | 1.08 | 0.99 | 1.15 | 1.12 | 0.97 |
| X019923 | BCG_3942C | 108  | 4  | 3  | 3  | 1.00 | 0.74 | 0.91 | 1.05 | 1.03 | 1.36 | 0.99 |
| X019923 | BCG_3945C | 379  | 10 | 7  | 7  | 1.00 | 0.98 | 0.82 | 1.00 | 1.01 | 1.02 | 0.89 |
| X019923 | BCG_3964C | 522  | 18 | 10 | 10 | 1.00 | 0.95 | 0.93 | 1.18 | 1.32 | 1.05 | 0.89 |
| X019923 | BCG_3965  | 247  | 10 | 7  | 7  | 1.00 | 0.77 | 0.84 | 0.84 | 0.78 | 1.29 | 0.70 |
| X019923 | BCG_3966  | 342  | 13 | 7  | 8  | 1.00 | 0.88 | 1.02 | 1.10 | 0.94 | 1.13 | 0.99 |

|         |           |     |    |    |    |      |      |      |      |      |      |      |
|---------|-----------|-----|----|----|----|------|------|------|------|------|------|------|
| X019923 | BCG_3967  | 740 | 19 | 14 | 15 | 1.00 | 0.93 | 0.89 | 0.96 | 0.91 | 1.08 | 0.93 |
| X019923 | BCG_3971  | 880 | 16 | 11 | 12 | 1.00 | 0.93 | 0.97 | 1.08 | 1.36 | 1.08 | 0.85 |
| X019923 | BCG_3972  | 356 | 17 | 6  | 11 | 1.00 | 0.89 | 0.90 | 1.03 | 1.00 | 1.13 | 0.57 |
| X019923 | BCG_3973  | 173 | 10 | 3  | 3  | 1.00 | 0.84 | 1.16 | 1.34 | 1.41 | 1.18 | 0.85 |
| X019923 | BCG_3974C | 104 | 3  | 3  | 3  | 1.00 | 0.99 | 0.94 | 1.10 | 1.06 | 1.01 | 0.77 |
| X019923 | BCG_3976C | 296 | 14 | 4  | 6  | 1.00 | 0.90 | 0.85 | 1.04 | 0.96 | 1.11 | 0.79 |
| X019923 | BCG_3978C | 798 | 33 | 13 | 27 | 1.00 | 0.89 | 0.80 | 0.87 | 0.87 | 1.13 | 0.72 |

| <b>Compound conc. on beads 2mM</b> |                                 |                                |                                |               |
|------------------------------------|---------------------------------|--------------------------------|--------------------------------|---------------|
| relative abundance                 |                                 |                                |                                |               |
| binding of NBF to fresh beads      | compound competition 2.5 uM GSK | compound competition 10 uM GSK | compound competition 40 uM GSK | IC50/KD (app) |
| 0.71                               | 0.80                            | 0.73                           | 0.74                           | 1.06          |
| 0.74                               | 0.58                            | 0.60                           | 0.47                           | 1.04          |
| 0.84                               | 0.58                            | 0.54                           | 0.51                           | 1.07          |
| 0.80                               | 0.86                            | 0.74                           | 0.64                           | 1.08          |
| 0.64                               | 0.73                            | 0.61                           | 0.59                           | 1.06          |
| 0.46                               | 0.60                            | 0.59                           | 0.49                           | 1.31          |
| 0.99                               | 1.52                            | 0.79                           | 0.76                           | 0.95          |
| 0.48                               | 0.63                            | 0.43                           | 0.42                           | 1.13          |
| 0.68                               | 0.78                            | 0.67                           | 0.68                           | 1.15          |
| 0.64                               | 0.81                            | 0.64                           | 0.62                           | 1.26          |
| 0.44                               | 1.07                            | 0.62                           | 0.55                           | 1.47          |
| 0.73                               | 0.87                            | 0.68                           | 0.66                           | 1.11          |
| 0.66                               | 0.81                            | 0.67                           | 0.65                           | 1.17          |
| 0.65                               | 0.79                            | 0.74                           | 0.67                           | 1.25          |
| 0.94                               | 0.69                            | 0.84                           | 0.76                           | 1.06          |
| 0.83                               | 0.92                            | 0.78                           | 0.70                           | 1.09          |
| 1.10                               | 1.26                            | 1.07                           | 1.04                           | 1.10          |
| 0.99                               | 1.07                            | 1.01                           | 0.99                           | 1.07          |
| 0.84                               | 0.91                            | 0.78                           | 0.63                           | 0.99          |
| 0.89                               | 1.09                            | 0.97                           | 0.92                           | 1.14          |
| 0.69                               | 0.57                            | 0.69                           | 0.63                           | 1.05          |
| 0.61                               | 0.98                            | 0.67                           | 0.75                           | 1.20          |

|      |      |      |      |      |
|------|------|------|------|------|
| 0.64 | 1.84 | 0.69 | 0.85 | 1.31 |
| 0.80 | 1.24 | 0.89 | 0.86 | 0.88 |
| 0.97 | 1.09 | 0.78 | 1.02 | 1.07 |
| 0.73 | 0.66 | 0.63 | 0.59 | 1.07 |
| 0.64 | 0.51 | 0.50 | 0.49 | 1.22 |
| 0.63 | 0.72 | 0.51 | 0.59 | 1.13 |
| 0.69 | 0.82 | 0.72 | 0.69 | 1.10 |
| 0.56 | 0.72 | 0.72 | 0.68 | 1.18 |
| 0.67 | 0.76 | 0.62 | 0.63 | 1.16 |
| 0.96 | 1.16 | 1.00 | 0.98 | 1.24 |
| 0.90 | 0.93 | 0.75 | 0.76 | 0.96 |
| 0.99 | 1.10 | 1.02 | 0.92 | 1.15 |
| 0.90 | 0.73 | 0.72 | 0.72 | 1.22 |
| 0.87 | 1.02 | 0.82 | 0.85 | 1.12 |
| 0.81 | 1.12 | 0.76 | 0.70 | 1.26 |
| 0.76 | 0.83 | 0.70 | 0.67 | 0.97 |
| 0.68 | 0.71 | 0.66 | 0.59 | 1.06 |
| 0.71 | 0.81 | 0.66 | 0.67 | 1.05 |
| 0.76 | 0.90 | 0.65 | 0.65 | 0.98 |
| 0.80 | 1.08 | 0.98 | 0.92 | 1.30 |
| 0.62 | 1.13 | 0.63 | 0.63 | 1.21 |
| 0.74 | 1.13 | 0.79 | 0.81 | 1.09 |
| 0.65 | 0.66 | 0.84 | 0.66 | 1.13 |
| 0.52 | 0.54 | 0.64 | 0.63 | 1.30 |
| 0.72 | 0.58 | 0.61 | 0.51 | 1.09 |
| 0.66 | 1.10 | 0.63 | 0.67 | 1.12 |
| 0.77 | 1.10 | 0.85 | 0.92 | 0.90 |
| 0.72 | 0.89 | 0.88 | 0.91 | 1.31 |
| 0.80 | 0.87 | 0.73 | 0.77 | 1.10 |
| 0.79 | 1.15 | 0.87 | 0.94 | 1.08 |
| 0.71 | 0.56 | 0.88 | 0.78 | 1.08 |
| 0.67 | 0.87 | 0.78 | 0.71 | 1.04 |
| 0.65 | 1.14 | 0.78 | 1.05 | 1.21 |
| 0.66 | 0.90 | 0.69 | 0.58 | 1.18 |
| 0.56 | 0.86 | 0.78 | 0.45 | 1.02 |
| 0.54 | 0.71 | 0.66 | 0.53 | 1.14 |
| 0.64 | 0.85 | 0.76 | 0.71 | 1.24 |
| 0.82 | 1.15 | 0.85 | 0.81 | 1.06 |
| 0.97 | 0.82 | 0.99 | 0.75 | 1.29 |

|      |      |      |      |      |
|------|------|------|------|------|
| 0.44 | 0.68 | 0.58 | 0.59 | 1.32 |
| 0.73 | 0.86 | 0.69 | 0.71 | 1.13 |
| 0.60 | 0.88 | 0.62 | 0.59 | 1.25 |
| 0.90 | 1.08 | 0.88 | 0.87 | 1.24 |
| 0.57 | 0.58 | 0.77 | 0.76 | 0.98 |
| 1.59 | 2.16 | 1.04 | 1.78 | 0.77 |
| 0.95 | 0.81 | 0.85 | 0.92 | 1.08 |
| 0.87 | 0.78 | 0.77 | 0.85 | 1.16 |
| 0.42 | 0.50 | 0.54 | 0.44 | 1.49 |
| 0.66 | 1.04 | 0.73 | 0.92 | 1.35 |
| 0.74 | 0.96 | 0.80 | 0.77 | 1.37 |
| 0.77 | 1.14 | 0.81 | 0.84 | 1.23 |
| 0.72 | 0.79 | 0.48 | 0.59 | 1.03 |
| 0.58 | 0.84 | 0.66 | 0.64 | 1.33 |
| 0.76 | 0.55 | 0.62 | 0.63 | 1.12 |
| 2.78 | 3.66 | 2.98 | 2.91 | 1.29 |
| 0.61 | 1.01 | 0.60 | 0.67 | 1.20 |
| 0.76 | 0.51 | 0.74 | 0.63 | 1.09 |
| 0.57 | 0.76 | 0.79 | 0.61 | 1.34 |
| 0.65 | 0.87 | 0.70 | 0.73 | 1.15 |
| 0.60 | 0.58 | 0.66 | 0.61 | 1.25 |
| 0.59 | 0.75 | 0.76 | 0.54 | 1.22 |
| 0.79 | 0.90 | 0.72 | 0.78 | 1.16 |
| 0.82 | 1.28 | 0.74 | 0.73 | 1.28 |
| 0.71 | 0.74 | 0.67 | 0.62 | 1.07 |
| 0.68 | 1.19 | 1.18 | 0.98 | 1.07 |
| 0.73 | 0.85 | 0.67 | 0.68 | 1.25 |
| 0.80 | 0.97 | 0.79 | 0.76 | 1.05 |
| 0.58 | 0.61 | 0.61 | 0.57 | 1.05 |
| 0.92 | 0.94 | 0.79 | 0.85 | 1.00 |
| 0.67 | 0.82 | 0.75 | 0.61 | 1.32 |
| 0.64 | 0.90 | 0.67 | 0.54 | 1.20 |
| 0.76 | 0.89 | 0.66 | 0.63 | 1.10 |
| 0.53 | 0.70 | 0.61 | 0.58 | 1.29 |
| 0.82 | 1.07 | 0.72 | 0.62 | 1.14 |
| 0.69 | 0.87 | 0.65 | 0.61 | 1.05 |
| 0.70 | 0.90 | 0.79 | 0.78 | 1.23 |
| 0.77 | 0.88 | 0.81 | 0.75 | 1.13 |
| 0.87 | 0.88 | 0.79 | 0.72 | 1.02 |

|      |      |      |      |      |
|------|------|------|------|------|
| 0.58 | 0.82 | 0.84 | 0.77 | 1.44 |
| 0.74 | 0.91 | 0.68 | 0.73 | 1.10 |
| 0.66 | 0.79 | 0.58 | 0.72 | 1.14 |
| 0.62 | 0.72 | 0.60 | 0.51 | 1.09 |
| 0.87 | 0.94 | 0.75 | 0.70 | 1.15 |
| 0.80 | 0.88 | 0.69 | 0.75 | 1.03 |
| 0.74 | 0.89 | 0.65 | 0.65 | 1.12 |
| 0.88 | 1.12 | 0.81 | 0.80 | 1.14 |
| 0.80 | 0.86 | 0.77 | 0.69 | 1.09 |
| 0.96 | 0.82 | 0.78 | 0.76 | 0.99 |
| 0.92 | 0.99 | 0.82 | 0.77 | 1.02 |
| 0.85 | 0.78 | 0.85 | 0.76 | 1.08 |
| 0.84 | 1.02 | 0.80 | 0.71 | 1.08 |
| 0.81 | 0.90 | 0.76 | 0.79 | 1.08 |
| 0.85 | 0.95 | 0.79 | 0.80 | 1.13 |
| 0.82 | 0.91 | 0.78 | 0.73 | 1.08 |
| 0.73 | 0.88 | 0.71 | 0.80 | 1.16 |
| 0.71 | 0.93 | 0.87 | 0.89 | 1.44 |
| 0.63 | 1.09 | 0.86 | 1.08 | 1.60 |
| 0.74 | 0.91 | 0.74 | 0.78 | 1.28 |
| 0.45 | 0.77 | 0.83 | 0.67 | 1.82 |
| 0.60 | 0.73 | 0.79 | 0.88 | 1.55 |
| 0.54 | 0.77 | 0.64 | 0.63 | 1.34 |
| 0.65 | 0.77 | 0.66 | 0.63 | 1.28 |
| 0.63 | 0.92 | 0.65 | 0.61 | 1.09 |
| 0.55 | 0.71 | 0.62 | 0.44 | 1.40 |
| 0.58 | 0.50 | 0.71 | 0.63 | 1.40 |
| 0.83 | 1.08 | 1.22 | 0.67 | 1.07 |
| 0.70 | 0.71 | 0.91 | 1.09 | 1.44 |
| 0.88 | 0.94 | 1.00 | 0.82 | 1.16 |
| 1.09 | 0.85 | 0.99 | 0.81 | 1.00 |
| 0.84 | 0.80 | 0.85 | 1.22 | 1.11 |
| 0.82 | 0.88 | 0.75 | 0.66 | 0.95 |
| 0.90 | 0.64 | 0.77 | 0.78 | 1.05 |
| 0.75 | 0.87 | 0.69 | 0.63 | 1.13 |
| 0.54 | 0.52 | 0.65 | 0.58 | 1.36 |
| 0.78 | 0.90 | 0.77 | 0.77 | 1.15 |
| 0.98 | 1.11 | 0.81 | 0.80 | 1.25 |
| 0.50 | 0.96 | 0.77 | 0.73 | 1.71 |

|      |      |      |      |      |
|------|------|------|------|------|
| 0.87 | 0.97 | 0.95 | 0.77 | 1.16 |
| 0.62 | 0.81 | 0.68 | 0.67 | 1.29 |
| 0.65 | 0.96 | 0.74 | 0.82 | 1.45 |
| 0.67 | 0.78 | 0.58 | 0.62 | 1.06 |
| 0.62 | 0.68 | 0.60 | 0.48 | 1.01 |
| 0.56 | 0.92 | 0.70 | 0.62 | 1.23 |
| 0.68 | 0.88 | 0.75 | 0.68 | 1.26 |
| 0.55 | 0.67 | 0.61 | 0.55 | 1.34 |
| 0.83 | 0.73 | 0.63 | 0.75 | 1.20 |
| 0.75 | 0.91 | 0.77 | 0.72 | 1.12 |
| 0.65 | 0.80 | 0.59 | 0.48 | 1.22 |
| 0.50 | 0.81 | 0.59 | 0.62 | 1.31 |
| 0.70 | 0.83 | 0.72 | 0.70 | 1.19 |
| 0.87 | 0.93 | 0.76 | 0.71 | 1.06 |
| 0.66 | 0.77 | 0.77 | 0.70 | 1.21 |
| 0.83 | 0.87 | 0.79 | 0.77 | 1.08 |
| 0.79 | 0.56 | 0.79 | 0.71 | 1.11 |
| 0.77 | 0.86 | 0.74 | 0.83 | 1.21 |
| 0.64 | 0.52 | 0.72 | 0.59 | 1.03 |
| 0.79 | 0.75 | 0.84 | 0.67 | 1.05 |
| 0.91 | 0.94 | 0.75 | 0.82 | 0.91 |
| 1.03 | 1.52 | 1.28 | 1.19 | 1.32 |
| 0.89 | 1.12 | 0.89 | 0.79 | 1.08 |
| 0.81 | 1.07 | 0.85 | 0.68 | 1.31 |
| 0.84 | 0.80 | 0.62 | 0.59 | 1.20 |
| 0.89 | 1.13 | 0.79 | 0.76 | 1.06 |
| 0.69 | 0.72 | 0.68 | 0.68 | 1.23 |
| 0.76 | 0.61 | 0.79 | 0.67 | 1.13 |
| 0.52 | 0.82 | 0.65 | 0.58 | 1.31 |
| 0.78 | 0.94 | 0.83 | 0.78 | 1.08 |
| 0.51 | 0.65 | 0.64 | 0.47 | 1.12 |
| 0.53 | 0.81 | 0.57 | 0.56 | 1.35 |
| 0.73 | 0.74 | 0.68 | 0.60 | 1.36 |
| 0.72 | 0.81 | 0.70 | 0.65 | 1.12 |
| 0.87 | 0.76 | 0.63 | 0.66 | 1.03 |
| 0.71 | 1.02 | 0.70 | 0.86 | 1.30 |
| 0.95 | 1.00 | 0.78 | 0.98 | 1.03 |
| 0.86 | 0.87 | 0.76 | 0.75 | 1.14 |
| 0.81 | 1.12 | 0.81 | 0.95 | 1.29 |



|      |      |      |      |      |
|------|------|------|------|------|
| 0.68 | 0.79 | 0.63 | 0.67 | 1.13 |
| 0.55 | 0.94 | 0.61 | 0.67 | 1.47 |
| 0.62 | 0.74 | 0.63 | 0.67 | 1.25 |
| 0.77 | 0.96 | 0.81 | 0.71 | 1.09 |
| 0.63 | 0.78 | 0.68 | 0.67 | 1.46 |
| 0.59 | 0.77 | 0.61 | 0.57 | 1.32 |
| 0.88 | 0.93 | 0.74 | 0.76 | 1.03 |
| 0.70 | 0.90 | 1.88 | 0.78 | 1.42 |
| 0.59 | 0.72 | 0.65 | 0.55 | 1.13 |
| 0.67 | 0.57 | 0.66 | 0.63 | 1.04 |
| 0.49 | 0.55 | 0.65 | 0.60 | 1.20 |
| 0.77 | 0.68 | 0.67 | 0.65 | 0.90 |
| 0.87 | 1.17 | 0.82 | 0.87 | 1.20 |
| 0.85 | 0.75 | 0.81 | 0.76 | 0.92 |
| 0.64 | 0.92 | 0.87 | 0.67 | 1.13 |
| 0.60 | 0.81 | 0.63 | 0.51 | 1.09 |
| 1.06 | 1.12 | 0.88 | 0.96 | 0.95 |
| 0.65 | 0.87 | 0.64 | 0.67 | 1.16 |
| 0.66 | 0.91 | 0.69 | 0.71 | 1.31 |
| 0.59 | 0.77 | 0.62 | 0.63 | 1.23 |
| 0.96 | 0.77 | 0.69 | 0.80 | 1.11 |
| 0.76 | 0.83 | 0.58 | 0.56 | 0.92 |
| 0.88 | 0.85 | 0.94 | 0.81 | 1.14 |
| 0.67 | 0.85 | 0.78 | 0.80 | 1.11 |
| 0.89 | 0.89 | 0.86 | 1.19 | 1.07 |
| 0.57 | 0.66 | 0.70 | 0.62 | 1.40 |
| 0.67 | 0.88 | 0.70 | 0.83 | 1.16 |
| 0.75 | 0.52 | 0.69 | 0.63 | 1.12 |
| 0.70 | 0.62 | 0.64 | 0.61 | 1.01 |
| 0.78 | 0.97 | 0.80 | 0.76 | 1.15 |
| 0.82 | 1.44 | 0.91 | 1.09 | 1.72 |
| 0.68 | 0.61 | 0.68 | 0.63 | 1.04 |
| 0.69 | 1.04 | 0.68 | 0.65 | 1.18 |
| 0.70 | 1.05 | 0.79 | 0.77 | 1.26 |
| 0.60 | 0.68 | 0.74 | 0.53 | 1.06 |
| 0.77 | 0.94 | 0.74 | 0.64 | 1.24 |
| 0.89 | 0.86 | 0.81 | 0.99 | 1.22 |
| 0.75 | 0.90 | 0.68 | 0.65 | 1.07 |
| 0.68 | 0.80 | 0.67 | 0.70 | 1.15 |

|      |      |      |      |      |
|------|------|------|------|------|
| 0.70 | 0.91 | 0.77 | 0.70 | 1.18 |
| 0.61 | 0.71 | 0.63 | 0.56 | 1.18 |
| 0.72 | 0.99 | 1.00 | 0.86 | 1.06 |
| 0.71 | 1.26 | 1.03 | 0.65 | 1.31 |
| 0.81 | 0.94 | 0.81 | 0.77 | 1.08 |
| 0.73 | 0.58 | 0.57 | 0.55 | 1.28 |
| 0.86 | 0.61 | 0.69 | 0.63 | 1.13 |
| 0.67 | 0.90 | 0.77 | 0.73 | 1.25 |
| 0.50 | 0.51 | 0.63 | 0.51 | 1.41 |
| 0.71 | 0.85 | 0.70 | 0.67 | 1.17 |
| 0.86 | 0.95 | 0.80 | 0.82 | 0.89 |
| 0.57 | 0.70 | 0.62 | 0.59 | 1.10 |
| 0.63 | 0.67 | 0.53 | 0.47 | 1.03 |
| 0.57 | 0.62 | 0.68 | 0.52 | 1.24 |
| 0.45 | 0.74 | 0.64 | 0.66 | 1.46 |
| 0.55 | 0.76 | 0.64 | 0.55 | 1.26 |
| 0.83 | 0.71 | 0.76 | 0.60 | 0.98 |
| 0.85 | 0.63 | 0.83 | 0.63 | 1.11 |
| 0.77 | 0.98 | 0.71 | 0.76 | 1.18 |
| 0.84 | 0.89 | 0.77 | 0.77 | 1.16 |
| 0.72 | 0.86 | 0.62 | 0.67 | 1.22 |
| 0.62 | 0.78 | 0.66 | 0.64 | 1.35 |
| 0.82 | 0.99 | 0.76 | 0.81 | 1.20 |
| 0.75 | 0.86 | 0.79 | 0.71 | 1.05 |
| 0.73 | 0.76 | 0.74 | 0.75 | 1.18 |
| 0.91 | 0.94 | 0.79 | 0.74 | 1.14 |
| 0.65 | 0.65 | 0.64 | 0.64 | 1.03 |
| 1.12 | 1.09 | 0.81 | 0.81 | 0.85 |
| 0.62 | 0.67 | 0.64 | 0.59 | 1.24 |
| 1.04 | 0.93 | 0.74 | 0.74 | 1.05 |
| 0.63 | 0.80 | 0.63 | 0.64 | 1.25 |
| 0.52 | 0.73 | 0.74 | 0.60 | 1.42 |
| 0.48 | 0.59 | 0.60 | 0.61 | 1.37 |
| 0.81 | 0.96 | 0.75 | 0.69 | 0.95 |
| 0.70 | 0.74 | 0.68 | 0.58 | 1.19 |
| 0.29 | 0.32 | 0.41 | 0.27 | 1.19 |
| 0.75 | 0.85 | 0.70 | 0.67 | 1.22 |
| 0.98 | 0.89 | 0.75 | 0.69 | 0.82 |
| 0.92 | 0.65 | 0.67 | 0.55 | 0.96 |

|      |      |      |      |      |
|------|------|------|------|------|
| 0.88 | 1.03 | 0.88 | 0.95 | 1.04 |
| 0.85 | 1.05 | 0.72 | 0.76 | 0.99 |
| 0.67 | 0.85 | 0.71 | 0.73 | 1.17 |
| 0.66 | 0.89 | 0.70 | 0.71 | 1.19 |
| 0.69 | 0.64 | 0.65 | 0.60 | 1.14 |
| 0.79 | 0.98 | 0.73 | 0.65 | 0.86 |
| 0.73 | 0.85 | 0.78 | 0.66 | 1.07 |
| 0.94 | 0.99 | 0.97 | 0.96 | 1.23 |
| 1.12 | 0.83 | 1.08 | 0.93 | 0.99 |
| 0.69 | 0.73 | 0.76 | 0.60 | 1.12 |
| 0.79 | 0.86 | 0.72 | 0.66 | 1.13 |
| 0.91 | 0.95 | 0.81 | 0.77 | 1.05 |
| 0.73 | 0.85 | 0.69 | 0.67 | 1.08 |
| 0.77 | 0.92 | 0.74 | 0.75 | 1.11 |
| 0.79 | 0.85 | 0.75 | 0.74 | 1.05 |
| 0.75 | 0.82 | 0.71 | 0.69 | 1.06 |
| 0.75 | 0.83 | 0.73 | 0.69 | 1.14 |
| 0.59 | 0.81 | 0.66 | 0.55 | 1.29 |
| 1.55 | 1.86 | 1.50 | 1.35 | 1.14 |
| 0.61 | 0.78 | 0.65 | 0.67 | 1.18 |
| 0.94 | 0.91 | 0.86 | 0.86 | 1.05 |
| 0.62 | 0.80 | 0.64 | 0.61 | 1.12 |
| 0.56 | 0.72 | 0.66 | 0.64 | 1.23 |
| 0.59 | 0.77 | 0.62 | 0.60 | 1.17 |
| 1.04 | 1.13 | 0.97 | 0.86 | 1.03 |
| 0.54 | 0.76 | 0.61 | 0.53 | 1.51 |
| 0.57 | 0.92 | 0.69 | 0.59 | 1.45 |
| 0.74 | 0.91 | 0.69 | 0.89 | 1.19 |
| 0.61 | 0.70 | 0.63 | 0.58 | 1.17 |
| 0.79 | 1.21 | 0.79 | 0.69 | 1.13 |
| 0.60 | 0.57 | 0.44 | 0.55 | 1.06 |
| 0.52 | 0.73 | 0.71 | 0.62 | 1.36 |
| 0.85 | 0.95 | 0.80 | 0.78 | 1.05 |
| 0.58 | 1.33 | 0.59 | 0.49 | 1.24 |
| 0.63 | 0.92 | 0.77 | 0.69 | 1.10 |
| 0.76 | 0.80 | 0.59 | 0.60 | 0.94 |
| 0.79 | 0.88 | 0.76 | 0.80 | 1.15 |
| 1.57 | 2.06 | 1.42 | 0.97 | 1.40 |
| 0.71 | 0.91 | 0.60 | 0.76 | 1.03 |

|      |      |      |      |      |
|------|------|------|------|------|
| 0.42 | 0.72 | 0.48 | 0.50 | 1.67 |
| 0.62 | 0.85 | 0.62 | 0.62 | 1.25 |
| 0.83 | 1.03 | 0.85 | 0.79 | 1.12 |
| 0.68 | 0.91 | 0.71 | 0.59 | 1.24 |
| 0.67 | 0.83 | 0.68 | 0.56 | 1.13 |
| 0.71 | 0.70 | 0.68 | 0.58 | 1.21 |
| 0.94 | 0.82 | 0.85 | 0.76 | 0.90 |
| 1.06 | 1.57 | 0.92 | 1.03 | 1.19 |
| 0.64 | 0.87 | 0.75 | 0.66 | 1.20 |
| 0.63 | 0.57 | 0.66 | 0.63 | 1.21 |
| 0.75 | 1.21 | 0.76 | 0.81 | 1.26 |
| 0.81 | 0.86 | 0.75 | 0.80 | 1.03 |
| 0.49 | 0.77 | 0.54 | 0.52 | 1.70 |
| 0.96 | 1.03 | 0.98 | 0.94 | 0.92 |
| 0.42 | 0.58 | 0.66 | 0.64 | 1.43 |
| 0.33 | 0.50 | 0.61 | 0.60 | 1.50 |
| 0.70 | 0.78 | 0.74 | 0.66 | 1.20 |
| 0.65 | 0.75 | 0.69 | 0.76 | 1.25 |
| 0.71 | 0.78 | 0.72 | 0.78 | 1.20 |
| 0.89 | 0.88 | 1.00 | 0.91 | 1.06 |
| 1.14 | 0.94 | 1.11 | 0.87 | 1.01 |
| 0.84 | 1.10 | 0.79 | 1.10 | 1.04 |
| 0.85 | 0.91 | 0.74 | 0.76 | 1.04 |
| 0.62 | 0.84 | 0.62 | 0.64 | 1.38 |
| 1.08 | 1.19 | 1.04 | 1.44 | 0.98 |
| 3.55 | 3.72 | 3.18 | 2.44 | 1.06 |
| 0.86 | 1.09 | 1.00 | 0.60 | 0.96 |
| 0.93 | 1.04 | 0.81 | 0.94 | 1.16 |
| 0.86 | 0.68 | 0.61 | 0.61 | 1.08 |
| 0.70 | 0.90 | 0.82 | 0.85 | 1.40 |
| 0.66 | 1.08 | 0.61 | 0.73 | 1.40 |
| 0.52 | 0.53 | 0.53 | 0.46 | 1.01 |
| 0.61 | 0.70 | 0.63 | 0.53 | 1.10 |
| 0.59 | 0.90 | 0.89 | 0.55 | 1.28 |
| 0.67 | 0.84 | 0.68 | 0.64 | 1.21 |
| 0.47 | 0.83 | 0.62 | 0.86 | 1.69 |
| 0.59 | 0.79 | 0.57 | 0.63 | 1.07 |
| 0.64 | 0.80 | 0.66 | 0.70 | 1.31 |
| 0.75 | 0.80 | 0.85 | 0.73 | 1.08 |

|      |      |      |      |      |
|------|------|------|------|------|
| 0.72 | 0.92 | 0.76 | 0.94 | 1.41 |
| 0.71 | 0.75 | 0.60 | 0.64 | 0.96 |
| 0.64 | 0.86 | 0.74 | 0.70 | 1.21 |
| 0.87 | 1.17 | 0.94 | 0.64 | 0.93 |
| 0.77 | 0.94 | 0.78 | 0.75 | 1.32 |
| 0.74 | 0.77 | 0.82 | 0.72 | 1.42 |
| 0.92 | 1.07 | 0.93 | 0.85 | 1.12 |
| 0.79 | 0.90 | 1.27 | 0.88 | 1.11 |
| 0.47 | 0.95 | 0.58 | 0.51 | 1.29 |
| 0.81 | 0.86 | 0.73 | 0.85 | 1.09 |
| 0.72 | 0.86 | 0.69 | 0.68 | 1.09 |
| 0.46 | 0.64 | 0.74 | 0.57 | 1.32 |
| 0.61 | 0.82 | 0.64 | 0.61 | 1.42 |
| 0.72 | 0.76 | 0.68 | 0.65 | 1.00 |
| 1.02 | 0.94 | 1.06 | 0.60 | 1.07 |
| 0.61 | 0.75 | 0.70 | 0.64 | 1.37 |
| 0.25 | 0.25 | 0.26 | 0.23 | 1.20 |
| 0.79 | 0.82 | 1.10 | 0.88 | 1.08 |
| 0.59 | 0.72 | 0.72 | 0.50 | 1.15 |
| 0.55 | 0.85 | 0.79 | 0.56 | 1.35 |
| 0.72 | 0.86 | 0.77 | 0.81 | 1.33 |
| 0.83 | 0.70 | 0.64 | 0.60 | 1.21 |
| 0.96 | 1.16 | 1.05 | 1.17 | 1.10 |
| 0.70 | 0.90 | 0.87 | 1.23 | 2.35 |
| 0.70 | 0.80 | 0.83 | 1.03 | 1.29 |
| 1.01 | 1.31 | 0.76 | 1.14 | 0.89 |
| 0.80 | 1.03 | 0.83 | 0.77 | 1.15 |
| 1.17 | 1.73 | 1.44 | 1.11 | 1.23 |
| 0.62 | 0.79 | 0.72 | 0.64 | 1.19 |
| 0.74 | 0.86 | 0.64 | 0.74 | 0.89 |
| 0.58 | 0.77 | 0.64 | 0.59 | 1.29 |
| 0.59 | 0.74 | 0.60 | 0.54 | 1.17 |
| 0.67 | 1.26 | 0.77 | 0.60 | 1.18 |
| 0.75 | 0.95 | 0.74 | 0.61 | 1.13 |
| 0.54 | 0.70 | 0.75 | 0.55 | 1.35 |
| 0.81 | 0.87 | 0.73 | 0.71 | 1.00 |
| 0.76 | 0.83 | 0.70 | 0.68 | 1.04 |
| 0.65 | 0.89 | 0.74 | 0.61 | 1.24 |
| 0.83 | 0.87 | 0.76 | 0.70 | 1.04 |

|      |      |      |      |      |
|------|------|------|------|------|
| 0.71 | 0.97 | 0.74 | 0.78 | 1.10 |
| 0.58 | 0.95 | 0.63 | 0.65 | 1.51 |
| 0.63 | 0.79 | 0.66 | 0.62 | 1.07 |
| 0.67 | 0.92 | 0.67 | 0.63 | 1.20 |
| 0.78 | 0.83 | 0.69 | 0.68 | 0.97 |
| 0.78 | 0.72 | 0.70 | 0.66 | 0.92 |
| 3.96 | 4.76 | 4.28 | 3.56 | 1.24 |
| 0.75 | 0.54 | 0.60 | 0.54 | 1.12 |
| 0.90 | 0.64 | 0.58 | 0.58 | 1.00 |
| 0.89 | 0.65 | 0.57 | 0.55 | 1.01 |
| 0.62 | 0.99 | 0.57 | 0.48 | 1.15 |
| 0.75 | 0.80 | 0.76 | 0.66 | 1.18 |
| 0.98 | 0.78 | 0.64 | 0.58 | 0.70 |
| 0.65 | 0.80 | 0.65 | 0.70 | 1.17 |
| 0.99 | 0.73 | 0.94 | 0.80 | 1.06 |
| 0.72 | 0.82 | 0.73 | 0.69 | 1.17 |
| 0.67 | 0.76 | 0.68 | 0.66 | 1.20 |
| 0.82 | 1.38 | 0.53 | 0.78 | 1.18 |
| 0.58 | 0.73 | 0.58 | 0.62 | 1.15 |
| 0.80 | 0.88 | 0.79 | 0.76 | 1.04 |
| 0.63 | 0.52 | 0.58 | 0.49 | 1.29 |
| 0.54 | 0.71 | 0.62 | 0.56 | 1.33 |
| 0.85 | 0.94 | 0.83 | 0.88 | 1.08 |
| 0.51 | 0.79 | 0.76 | 0.76 | 1.45 |
| 0.59 | 0.75 | 0.65 | 0.61 | 1.13 |
| 0.60 | 0.85 | 0.66 | 0.65 | 1.19 |
| 0.76 | 0.84 | 0.65 | 0.72 | 1.05 |
| 0.69 | 0.78 | 0.70 | 0.64 | 1.04 |
| 0.79 | 0.85 | 0.74 | 0.68 | 1.03 |
| 0.78 | 0.83 | 0.74 | 0.76 | 1.03 |
| 0.77 | 0.83 | 0.74 | 0.72 | 0.96 |
| 0.71 | 0.76 | 0.67 | 0.63 | 1.16 |
| 0.75 | 0.82 | 0.62 | 0.58 | 0.93 |
| 0.69 | 0.86 | 0.68 | 0.68 | 1.11 |
| 0.71 | 0.87 | 0.67 | 0.64 | 1.11 |
| 0.66 | 0.89 | 0.63 | 0.65 | 1.14 |
| 0.89 | 0.81 | 0.92 | 0.78 | 0.81 |
| 0.80 | 0.87 | 0.73 | 0.67 | 1.02 |
| 0.83 | 0.93 | 0.85 | 0.78 | 1.16 |

|      |      |      |      |      |
|------|------|------|------|------|
| 0.99 | 0.93 | 0.98 | 0.80 | 0.92 |
| 0.76 | 0.86 | 0.67 | 0.71 | 1.00 |
| 0.75 | 0.82 | 0.68 | 0.68 | 0.98 |
| 0.78 | 0.87 | 0.77 | 0.70 | 1.06 |
| 0.74 | 0.81 | 0.72 | 0.61 | 1.06 |
| 0.71 | 0.76 | 0.70 | 0.67 | 1.06 |
| 0.77 | 0.83 | 0.75 | 0.79 | 1.02 |
| 0.53 | 0.81 | 0.55 | 0.56 | 1.07 |
| 0.64 | 0.78 | 0.74 | 0.75 | 1.12 |
| 0.74 | 0.78 | 0.75 | 0.74 | 1.06 |
| 0.78 | 0.85 | 0.75 | 0.72 | 1.07 |
| 0.84 | 0.72 | 0.82 | 0.84 | 0.87 |
| 0.65 | 1.06 | 0.71 | 0.64 | 1.24 |
| 0.51 | 0.76 | 0.61 | 0.61 | 1.39 |
| 0.78 | 0.90 | 0.73 | 0.73 | 1.11 |
| 0.52 | 0.63 | 0.59 | 0.50 | 1.12 |
| 0.74 | 0.85 | 0.95 | 0.76 | 1.16 |
| 0.78 | 0.86 | 0.72 | 0.82 | 1.06 |
| 0.72 | 0.69 | 0.78 | 0.57 | 1.04 |
| 0.97 | 1.11 | 0.91 | 0.82 | 1.16 |
| 0.72 | 0.80 | 0.68 | 0.65 | 1.19 |
| 0.81 | 0.68 | 0.89 | 0.67 | 0.95 |
| 0.62 | 0.67 | 0.68 | 0.61 | 1.22 |
| 0.85 | 0.97 | 0.96 | 0.93 | 1.18 |
| 1.22 | 1.31 | 1.20 | 1.07 | 1.12 |
| 0.55 | 0.68 | 0.66 | 0.56 | 1.21 |
| 0.80 | 0.91 | 0.67 | 0.58 | 1.11 |
| 0.63 | 0.86 | 0.80 | 0.81 | 1.33 |
| 0.63 | 0.79 | 0.80 | 0.68 | 1.28 |
| 0.55 | 0.65 | 0.53 | 0.54 | 1.27 |
| 0.74 | 0.76 | 0.66 | 0.67 | 0.98 |
| 0.73 | 1.01 | 0.76 | 0.78 | 1.23 |
| 0.71 | 0.78 | 0.71 | 0.65 | 1.15 |
| 0.99 | 1.50 | 0.87 | 1.04 | 1.20 |
| 0.75 | 0.83 | 0.82 | 0.86 | 1.27 |
| 0.54 | 0.74 | 0.62 | 0.56 | 1.44 |
| 0.68 | 0.69 | 0.62 | 0.61 | 1.18 |
| 0.67 | 0.88 | 0.68 | 0.73 | 1.16 |
| 0.61 | 0.59 | 0.74 | 0.60 | 0.95 |

|      |      |      |      |      |
|------|------|------|------|------|
| 0.65 | 0.80 | 0.69 | 0.62 | 1.14 |
| 0.73 | 0.91 | 1.34 | 0.73 | 1.27 |
| 0.91 | 1.19 | 0.98 | 0.81 | 1.01 |
| 0.98 | 0.75 | 0.70 | 0.86 | 0.85 |
| 0.86 | 0.84 | 0.70 | 0.81 | 1.03 |
| 0.80 | 0.84 | 0.76 | 0.74 | 1.09 |
| 0.42 | 0.44 | 0.51 | 0.36 | 1.12 |
| 0.70 | 0.76 | 0.78 | 0.78 | 1.24 |
| 0.68 | 0.64 | 0.69 | 0.54 | 1.20 |
| 0.71 | 0.78 | 0.59 | 0.75 | 1.08 |
| 0.79 | 1.00 | 0.67 | 0.74 | 1.14 |
| 0.69 | 0.82 | 0.84 | 0.75 | 1.37 |
| 0.73 | 0.98 | 0.75 | 0.81 | 1.23 |
| 0.48 | 0.90 | 0.58 | 0.58 | 0.88 |
| 0.81 | 0.97 | 0.85 | 0.77 | 1.21 |
| 0.57 | 0.81 | 0.59 | 0.61 | 1.28 |
| 0.65 | 0.71 | 0.73 | 0.61 | 1.23 |
| 0.55 | 0.58 | 0.60 | 0.45 | 1.11 |
| 0.74 | 1.14 | 1.35 | 0.78 | 1.21 |
| 0.69 | 0.83 | 0.68 | 0.65 | 1.19 |
| 0.62 | 0.79 | 0.82 | 0.79 | 1.21 |
| 0.51 | 0.69 | 0.68 | 0.67 | 1.20 |
| 0.73 | 1.10 | 0.95 | 0.70 | 1.26 |
| 0.61 | 0.81 | 0.67 | 0.61 | 1.27 |
| 0.70 | 1.20 | 0.83 | 0.84 | 1.38 |
| 0.66 | 0.84 | 0.74 | 0.67 | 1.16 |
| 0.56 | 0.74 | 0.60 | 0.53 | 1.23 |
| 0.70 | 0.74 | 0.73 | 0.65 | 1.14 |
| 0.60 | 0.72 | 0.69 | 0.78 | 1.35 |
| 0.82 | 0.95 | 0.92 | 0.88 | 1.01 |
| 0.73 | 0.91 | 0.77 | 0.79 | 1.12 |
| 0.46 | 0.92 | 0.66 | 0.61 | 1.56 |
| 0.83 | 0.94 | 0.75 | 0.74 | 1.13 |
| 0.88 | 0.60 | 0.77 | 0.57 | 1.21 |
| 0.80 | 0.62 | 0.65 | 0.74 | 1.03 |
| 0.64 | 0.57 | 0.77 | 0.52 | 1.31 |
| 0.70 | 0.77 | 0.64 | 0.62 | 1.05 |
| 0.80 | 0.56 | 0.75 | 0.70 | 1.14 |
| 1.03 | 1.14 | 0.85 | 0.93 | 0.97 |



|      |      |      |      |      |
|------|------|------|------|------|
| 0.70 | 0.97 | 0.74 | 0.77 | 1.15 |
| 0.74 | 0.67 | 0.79 | 0.81 | 1.26 |
| 0.78 | 0.78 | 0.73 | 0.82 | 0.93 |
| 1.22 | 1.61 | 0.83 | 1.31 | 0.78 |
| 0.48 | 0.68 | 0.53 | 0.52 | 1.35 |
| 0.71 | 0.79 | 0.73 | 0.70 | 1.19 |
| 0.73 | 0.58 | 0.68 | 0.64 | 1.40 |
| 0.74 | 0.99 | 0.88 | 0.72 | 1.24 |
| 0.63 | 1.21 | 0.78 | 0.65 | 1.55 |
| 0.84 | 0.91 | 0.71 | 0.73 | 1.09 |
| 0.86 | 0.96 | 0.95 | 0.71 | 1.37 |
| 0.56 | 1.02 | 0.64 | 0.58 | 1.14 |
| 0.80 | 0.82 | 0.72 | 0.76 | 1.05 |
| 0.68 | 0.97 | 0.89 | 0.84 | 1.35 |
| 0.77 | 0.92 | 0.78 | 0.70 | 1.18 |
| 0.50 | 0.68 | 0.66 | 0.58 | 1.36 |
| 0.81 | 0.97 | 0.85 | 0.98 | 1.22 |
| 0.75 | 0.92 | 0.80 | 0.63 | 1.18 |
| 0.76 | 1.07 | 1.45 | 1.02 | 1.24 |
| 0.97 | 0.77 | 0.88 | 0.71 | 1.15 |
| 0.73 | 0.98 | 0.86 | 0.74 | 1.31 |
| 0.56 | 0.58 | 0.50 | 0.34 | 1.17 |
| 0.73 | 0.70 | 0.80 | 0.68 | 1.07 |
| 0.76 | 1.01 | 0.78 | 0.80 | 1.10 |
| 0.70 | 1.07 | 0.85 | 0.69 | 1.23 |
| 1.08 | 1.18 | 0.90 | 1.11 | 1.07 |
| 0.62 | 0.73 | 0.63 | 0.49 | 1.24 |
| 0.61 | 0.75 | 0.76 | 0.64 | 1.26 |
| 0.61 | 0.74 | 0.75 | 0.58 | 1.22 |
| 0.76 | 0.94 | 0.75 | 0.76 | 1.19 |
| 0.50 | 0.56 | 0.45 | 0.52 | 1.26 |
| 0.55 | 0.80 | 0.68 | 0.60 | 1.37 |
| 0.70 | 0.80 | 0.70 | 0.64 | 1.15 |
| 0.68 | 0.68 | 0.69 | 0.69 | 1.20 |
| 0.87 | 0.89 | 0.67 | 0.54 | 0.93 |
| 1.07 | 0.71 | 0.93 | 0.71 | 0.90 |
| 0.88 | 1.06 | 0.81 | 0.73 | 1.04 |
| 0.67 | 0.81 | 0.74 | 0.57 | 1.26 |
| 0.55 | 0.82 | 0.64 | 0.66 | 1.29 |

|      |      |      |      |      |
|------|------|------|------|------|
| 0.76 | 1.04 | 0.78 | 0.77 | 1.07 |
| 0.65 | 0.78 | 0.71 | 0.63 | 1.13 |
| 0.67 | 0.59 | 0.49 | 0.59 | 1.07 |
| 0.58 | 0.71 | 0.61 | 0.57 | 1.21 |
| 0.60 | 0.76 | 0.67 | 0.59 | 1.17 |
| 0.52 | 0.88 | 0.56 | 0.64 | 1.22 |
| 0.72 | 0.92 | 0.74 | 0.77 | 1.28 |
| 0.72 | 0.77 | 0.72 | 0.76 | 1.11 |
| 0.82 | 0.71 | 0.82 | 0.61 | 1.00 |
| 0.52 | 0.60 | 0.58 | 0.51 | 1.32 |
| 0.66 | 0.67 | 0.74 | 0.71 | 1.05 |
| 0.76 | 0.66 | 0.73 | 0.68 | 1.10 |
| 0.66 | 0.79 | 0.69 | 0.62 | 1.47 |
| 0.61 | 0.73 | 0.62 | 0.57 | 1.03 |
| 0.77 | 0.58 | 0.75 | 0.71 | 1.14 |
| 0.76 | 0.76 | 0.74 | 0.61 | 1.17 |
| 0.52 | 0.73 | 0.67 | 0.61 | 1.16 |
| 0.58 | 0.62 | 0.52 | 0.42 | 1.26 |
| 0.79 | 1.04 | 0.80 | 0.75 | 1.17 |
| 0.70 | 0.70 | 0.73 | 0.58 | 1.01 |
| 0.73 | 0.79 | 0.76 | 0.63 | 1.05 |
| 0.61 | 0.72 | 0.63 | 0.58 | 1.38 |
| 0.76 | 0.81 | 0.67 | 0.66 | 1.20 |
| 0.85 | 0.64 | 0.90 | 0.88 | 1.35 |
| 0.89 | 1.03 | 0.83 | 0.86 | 1.14 |
| 0.68 | 0.90 | 0.61 | 0.58 | 1.17 |
| 0.55 | 0.83 | 0.61 | 0.59 | 1.25 |
| 0.64 | 0.71 | 0.74 | 0.80 | 1.23 |
| 0.73 | 0.89 | 0.81 | 0.86 | 1.29 |
| 0.73 | 1.24 | 0.78 | 0.78 | 1.13 |
| 0.75 | 1.19 | 0.78 | 0.76 | 1.30 |
| 0.55 | 0.60 | 0.78 | 0.68 | 1.01 |
| 0.66 | 0.86 | 0.71 | 0.69 | 1.25 |
| 0.76 | 0.97 | 0.71 | 0.65 | 0.98 |
| 0.62 | 0.93 | 0.66 | 0.72 | 1.36 |
| 0.86 | 0.93 | 0.88 | 0.87 | 1.13 |
| 0.53 | 0.74 | 0.62 | 0.57 | 1.39 |
| 0.76 | 0.83 | 0.66 | 0.71 | 1.01 |
| 0.66 | 0.84 | 0.65 | 0.59 | 1.13 |

|      |      |      |      |      |
|------|------|------|------|------|
| 0.61 | 0.71 | 0.56 | 0.45 | 1.63 |
| 0.68 | 0.78 | 0.65 | 0.67 | 1.21 |
| 0.45 | 1.20 | 0.71 | 0.68 | 1.49 |
| 0.84 | 0.90 | 0.71 | 0.59 | 1.00 |
| 0.71 | 0.85 | 0.74 | 0.68 | 1.20 |
| 0.71 | 0.77 | 0.69 | 0.64 | 1.07 |
| 0.89 | 0.77 | 0.70 | 0.65 | 1.14 |
| 0.86 | 0.97 | 0.72 | 0.69 | 1.06 |
| 0.76 | 0.78 | 0.65 | 0.68 | 1.03 |
| 0.60 | 0.82 | 0.57 | 0.56 | 1.09 |
| 0.55 | 0.69 | 0.99 | 0.65 | 1.71 |
| 0.49 | 0.68 | 0.59 | 0.56 | 1.43 |
| 0.71 | 0.93 | 0.88 | 0.87 | 1.35 |
| 0.80 | 0.91 | 0.80 | 0.90 | 1.13 |
| 0.76 | 0.98 | 0.68 | 0.78 | 1.13 |
| 0.92 | 1.27 | 0.69 | 0.87 | 1.18 |
| 0.49 | 0.60 | 0.47 | 0.43 | 1.06 |
| 0.43 | 0.70 | 0.61 | 0.57 | 1.56 |
| 0.37 | 0.92 | 0.71 | 0.60 | 1.83 |
| 0.69 | 1.20 | 0.97 | 0.85 | 1.35 |
| 0.79 | 0.77 | 0.76 | 0.75 | 1.17 |
| 0.87 | 1.00 | 0.92 | 0.85 | 1.19 |
| 0.57 | 0.81 | 0.66 | 0.54 | 1.25 |
| 0.89 | 0.94 | 0.86 | 0.81 | 0.99 |
| 0.63 | 0.85 | 0.68 | 0.63 | 1.22 |
| 0.72 | 0.73 | 0.66 | 0.65 | 1.20 |
| 0.83 | 0.87 | 0.76 | 0.71 | 1.11 |
| 0.64 | 0.78 | 0.63 | 0.67 | 1.24 |
| 0.45 | 0.60 | 0.52 | 0.40 | 1.22 |
| 0.76 | 0.79 | 0.64 | 0.59 | 1.07 |
| 0.65 | 0.77 | 0.96 | 0.78 | 1.35 |
| 0.74 | 0.96 | 1.07 | 1.02 | 1.39 |
| 0.63 | 0.78 | 0.66 | 0.65 | 1.24 |
| 0.63 | 0.82 | 0.66 | 0.61 | 1.26 |
| 0.92 | 1.20 | 0.99 | 1.06 | 1.07 |
| 0.84 | 0.98 | 0.80 | 0.90 | 1.12 |
| 1.04 | 1.01 | 0.93 | 1.00 | 1.07 |
| 0.72 | 0.82 | 0.66 | 0.66 | 1.09 |
| 0.73 | 0.86 | 0.67 | 0.70 | 1.11 |

|      |      |      |      |      |
|------|------|------|------|------|
| 0.73 | 0.54 | 0.81 | 0.64 | 1.09 |
| 0.71 | 0.83 | 0.76 | 0.62 | 1.32 |
| 0.81 | 0.84 | 0.72 | 0.69 | 1.05 |
| 0.61 | 0.71 | 0.72 | 0.50 | 1.22 |
| 0.61 | 0.91 | 0.60 | 0.65 | 1.07 |
| 0.73 | 1.07 | 0.82 | 0.84 | 1.24 |
| 0.59 | 1.07 | 0.70 | 0.68 | 1.35 |
| 0.64 | 1.16 | 0.71 | 0.64 | 1.08 |
| 0.52 | 0.87 | 0.59 | 0.67 | 1.26 |
| 0.72 | 0.85 | 0.73 | 0.71 | 1.28 |
| 0.62 | 0.72 | 0.66 | 0.59 | 1.18 |
| 0.72 | 0.85 | 0.68 | 0.68 | 1.17 |
| 0.74 | 0.85 | 0.66 | 0.63 | 0.96 |
| 0.60 | 0.83 | 0.80 | 0.49 | 1.10 |
| 0.90 | 1.05 | 0.79 | 0.85 | 1.13 |
| 0.75 | 1.03 | 0.69 | 0.85 | 1.21 |
| 0.55 | 0.51 | 0.63 | 0.47 | 1.29 |
| 0.63 | 0.76 | 0.71 | 0.61 | 1.12 |
| 0.79 | 1.05 | 0.83 | 1.06 | 1.25 |
| 1.98 | 2.44 | 2.26 | 2.01 | 1.25 |
| 1.70 | 1.88 | 1.62 | 1.45 | 0.98 |
| 0.67 | 0.86 | 0.55 | 0.57 | 1.35 |
| 0.64 | 0.72 | 0.72 | 0.64 | 1.25 |
| 0.79 | 0.65 | 0.83 | 0.83 | 0.93 |
| 1.07 | 1.26 | 0.81 | 0.78 | 0.98 |
| 0.68 | 0.77 | 0.72 | 0.61 | 1.08 |
| 0.47 | 0.69 | 0.64 | 0.70 | 1.48 |
| 0.41 | 0.65 | 0.48 | 0.44 | 1.31 |
| 0.65 | 0.59 | 0.66 | 0.58 | 0.93 |
| 0.56 | 0.79 | 0.60 | 0.57 | 1.20 |
| 0.78 | 0.58 | 0.80 | 0.60 | 1.15 |
| 0.65 | 0.45 | 0.66 | 0.60 | 1.08 |
| 0.55 | 0.67 | 0.59 | 0.62 | 1.30 |
| 0.68 | 0.89 | 0.67 | 0.75 | 1.34 |
| 0.96 | 0.93 | 0.64 | 0.75 | 1.01 |
| 0.55 | 0.94 | 0.70 | 0.71 | 1.49 |
| 0.65 | 0.90 | 1.17 | 0.57 | 1.31 |
| 0.63 | 0.78 | 0.69 | 0.67 | 1.24 |
| 0.58 | 0.66 | 0.65 | 0.60 | 1.36 |

|      |      |      |      |      |
|------|------|------|------|------|
| 0.82 | 0.69 | 0.64 | 1.22 | 0.92 |
| 0.57 | 0.71 | 0.60 | 0.59 | 1.26 |
| 0.67 | 0.84 | 0.63 | 0.65 | 1.24 |
| 0.43 | 0.78 | 0.87 | 0.97 | 1.73 |
| 0.75 | 0.63 | 0.76 | 0.72 | 1.11 |
| 0.75 | 0.67 | 0.94 | 0.81 | 1.02 |
| 0.70 | 0.80 | 0.79 | 0.59 | 1.30 |
| 0.65 | 0.90 | 0.69 | 0.75 | 1.02 |
| 0.75 | 0.77 | 0.67 | 0.60 | 1.09 |
| 0.93 | 1.08 | 0.94 | 0.93 | 1.12 |
| 0.81 | 0.89 | 0.66 | 0.74 | 1.19 |
| 0.87 | 0.99 | 0.78 | 0.80 | 1.08 |
| 0.59 | 0.74 | 0.70 | 0.61 | 1.46 |
| 0.76 | 0.80 | 0.69 | 0.59 | 1.08 |
| 1.03 | 1.07 | 1.01 | 1.26 | 1.35 |
| 0.73 | 0.81 | 0.68 | 0.72 | 1.08 |
| 0.73 | 0.88 | 0.77 | 0.93 | 1.28 |
| 0.92 | 1.08 | 0.84 | 0.78 | 1.08 |
| 0.75 | 0.99 | 0.87 | 0.88 | 1.46 |
| 0.54 | 0.64 | 0.51 | 0.69 | 1.15 |
| 0.67 | 0.80 | 0.65 | 0.65 | 1.16 |
| 1.02 | 1.19 | 0.85 | 0.88 | 1.10 |
| 0.53 | 0.68 | 0.60 | 0.53 | 1.26 |
| 0.73 | 0.86 | 0.74 | 0.82 | 1.19 |
| 0.56 | 0.76 | 0.62 | 0.59 | 1.21 |
| 0.87 | 1.03 | 1.14 | 1.06 | 1.61 |
| 0.65 | 0.82 | 0.71 | 0.71 | 1.25 |
| 0.60 | 0.69 | 0.62 | 0.56 | 1.08 |
| 0.90 | 0.63 | 0.59 | 0.60 | 1.04 |
| 0.57 | 1.21 | 0.96 | 0.78 | 1.17 |
| 0.79 | 0.59 | 0.63 | 0.54 | 1.00 |
| 0.73 | 0.73 | 1.13 | 0.83 | 1.01 |
| 0.68 | 0.85 | 0.69 | 0.61 | 1.15 |
| 0.73 | 0.83 | 0.97 | 1.10 | 1.34 |
| 0.65 | 0.78 | 0.65 | 0.57 | 1.39 |
| 0.83 | 0.92 | 0.81 | 0.77 | 1.09 |
| 0.59 | 0.79 | 0.68 | 0.65 | 1.37 |
| 0.55 | 1.09 | 0.67 | 0.74 | 1.34 |
| 0.82 | 0.91 | 0.82 | 0.84 | 1.11 |

|      |      |      |      |      |
|------|------|------|------|------|
| 0.80 | 0.77 | 0.73 | 0.81 | 0.97 |
| 0.72 | 0.81 | 0.68 | 0.63 | 1.16 |
| 0.78 | 0.52 | 0.82 | 0.71 | 1.14 |
| 0.62 | 0.83 | 0.65 | 0.63 | 1.30 |
| 0.86 | 0.74 | 0.88 | 0.92 | 0.98 |
| 0.76 | 0.72 | 0.71 | 0.67 | 1.09 |
| 1.20 | 1.00 | 0.77 | 0.87 | 0.60 |
| 0.87 | 0.89 | 0.80 | 0.74 | 1.02 |
| 1.01 | 1.08 | 0.91 | 0.77 | 1.05 |
| 0.65 | 0.98 | 0.52 | 0.52 | 1.29 |
| 0.78 | 0.86 | 0.87 | 0.82 | 1.34 |
| 0.81 | 0.66 | 0.65 | 0.71 | 1.24 |
| 0.66 | 0.84 | 0.74 | 0.66 | 1.21 |
| 0.73 | 0.90 | 0.88 | 0.70 | 1.24 |
| 0.73 | 0.77 | 0.86 | 0.77 | 1.38 |
| 0.63 | 0.70 | 0.60 | 0.78 | 1.18 |
| 0.56 | 0.76 | 0.65 | 0.58 | 1.29 |
| 0.75 | 0.89 | 0.88 | 0.86 | 1.21 |
| 0.75 | 0.82 | 0.80 | 0.78 | 1.14 |
| 0.54 | 0.75 | 0.58 | 0.57 | 0.99 |
| 0.83 | 1.01 | 0.81 | 0.94 | 1.20 |
| 0.98 | 1.09 | 0.82 | 0.88 | 1.00 |
| 0.51 | 0.69 | 0.64 | 0.57 | 1.39 |
| 0.64 | 0.85 | 0.65 | 0.58 | 1.28 |
| 0.78 | 0.85 | 0.70 | 0.77 | 1.06 |
| 0.57 | 0.80 | 0.70 | 0.65 | 1.34 |
| 0.26 | 0.37 | 0.38 | 0.30 | 1.28 |
| 0.72 | 0.56 | 0.68 | 0.51 | 0.99 |
| 0.86 | 0.95 | 0.72 | 0.75 | 0.85 |
| 0.49 | 0.75 | 0.67 | 0.57 | 1.41 |
| 0.50 | 0.56 | 0.77 | 0.78 | 1.49 |
| 0.83 | 0.98 | 0.77 | 0.88 | 1.02 |
| 0.85 | 1.02 | 0.76 | 0.77 | 1.03 |
| 0.85 | 0.92 | 0.79 | 0.83 | 1.03 |
| 0.82 | 0.85 | 0.75 | 0.80 | 1.06 |
| 0.78 | 0.77 | 0.71 | 0.67 | 1.08 |
| 0.79 | 0.92 | 0.79 | 0.77 | 1.18 |
| 0.73 | 0.77 | 0.69 | 0.64 | 1.10 |
| 0.61 | 0.66 | 0.66 | 0.57 | 1.20 |

|      |      |      |      |      |
|------|------|------|------|------|
| 1.01 | 1.21 | 0.87 | 0.74 | 0.85 |
| 0.52 | 0.77 | 0.49 | 0.63 | 1.47 |
| 0.82 | 0.92 | 0.78 | 0.86 | 1.16 |
| 0.55 | 0.90 | 0.79 | 0.69 | 1.27 |
| 0.47 | 0.73 | 0.75 | 0.43 | 1.19 |
| 0.74 | 1.23 | 0.81 | 0.78 | 1.50 |
| 0.83 | 0.95 | 1.02 | 0.93 | 1.15 |
| 0.80 | 0.87 | 0.86 | 0.93 | 1.06 |
| 0.65 | 0.88 | 0.70 | 0.68 | 1.21 |
| 0.73 | 0.82 | 0.66 | 0.60 | 1.10 |
| 0.60 | 0.75 | 0.69 | 0.61 | 1.40 |
| 0.84 | 0.79 | 0.90 | 0.76 | 1.14 |
| 2.32 | 1.84 | 2.30 | 2.05 | 1.25 |
| 0.74 | 0.61 | 0.57 | 0.57 | 1.22 |
| 0.56 | 0.93 | 0.54 | 0.52 | 1.57 |
| 0.73 | 0.87 | 0.76 | 0.70 | 1.11 |
| 0.73 | 0.81 | 0.83 | 0.75 | 1.08 |
| 0.67 | 0.88 | 0.68 | 0.70 | 1.21 |
| 0.59 | 0.81 | 0.78 | 0.64 | 1.46 |
| 0.86 | 0.93 | 0.77 | 0.72 | 1.09 |
| 0.72 | 0.86 | 0.75 | 0.58 | 0.98 |
| 0.76 | 1.02 | 0.60 | 0.57 | 1.17 |
| 0.74 | 1.03 | 0.66 | 0.70 | 1.22 |
| 0.79 | 0.81 | 0.72 | 0.66 | 1.01 |
| 0.38 | 1.15 | 0.34 | 0.63 | 2.37 |
| 0.78 | 0.82 | 0.67 | 0.79 | 1.08 |
| 0.76 | 1.05 | 0.72 | 0.72 | 1.28 |
| 0.86 | 0.92 | 0.78 | 0.81 | 1.03 |
| 0.73 | 0.74 | 0.74 | 0.75 | 1.15 |
| 1.02 | 1.11 | 0.92 | 0.83 | 1.16 |
| 0.63 | 0.74 | 0.73 | 0.73 | 1.31 |
| 0.27 | 0.42 | 0.41 | 0.32 | 1.58 |
| 0.63 | 0.79 | 0.65 | 0.64 | 1.13 |
| 0.84 | 0.92 | 0.76 | 0.72 | 1.09 |
| 0.82 | 0.93 | 0.73 | 0.81 | 1.30 |
| 0.63 | 0.81 | 1.05 | 1.06 | 1.66 |
| 0.80 | 0.92 | 0.76 | 0.77 | 1.14 |
| 0.91 | 0.72 | 0.62 | 0.69 | 1.09 |
| 0.44 | 0.70 | 0.57 | 0.60 | 1.60 |

|      |      |      |      |      |
|------|------|------|------|------|
| 0.50 | 0.99 | 0.58 | 0.51 | 1.02 |
| 0.77 | 0.57 | 0.74 | 0.48 | 0.85 |
| 0.93 | 0.81 | 0.82 | 0.71 | 1.03 |
| 0.78 | 0.83 | 0.70 | 0.66 | 1.06 |
| 0.64 | 0.81 | 0.66 | 0.63 | 1.27 |
| 0.73 | 0.81 | 0.79 | 0.79 | 1.10 |
| 0.81 | 0.56 | 0.74 | 0.69 | 1.08 |
| 0.52 | 0.66 | 0.63 | 0.55 | 1.35 |
| 0.58 | 0.58 | 0.82 | 0.63 | 1.20 |
| 0.62 | 0.88 | 0.67 | 0.80 | 1.27 |
| 0.74 | 0.89 | 0.76 | 0.73 | 1.25 |
| 0.67 | 1.04 | 0.76 | 0.82 | 1.46 |
| 0.73 | 0.79 | 0.73 | 0.73 | 1.15 |
| 0.55 | 0.78 | 0.69 | 0.52 | 1.33 |
| 0.65 | 0.93 | 0.80 | 0.77 | 1.26 |
| 0.60 | 0.76 | 0.73 | 0.67 | 1.37 |
| 0.71 | 1.01 | 0.98 | 1.03 | 1.67 |
| 0.67 | 0.54 | 0.60 | 0.71 | 1.17 |
| 0.77 | 0.78 | 0.74 | 0.64 | 1.20 |
| 0.73 | 0.79 | 0.64 | 0.69 | 1.15 |
| 0.58 | 0.82 | 0.58 | 0.63 | 1.34 |
| 0.78 | 0.88 | 0.77 | 0.78 | 1.10 |
| 0.91 | 0.95 | 0.85 | 0.63 | 1.03 |
| 0.62 | 0.67 | 0.65 | 0.60 | 1.14 |
| 0.68 | 0.82 | 0.68 | 0.58 | 1.29 |
| 0.68 | 0.76 | 0.67 | 0.65 | 1.16 |
| 0.48 | 0.69 | 0.58 | 0.55 | 1.41 |
| 0.52 | 0.70 | 0.60 | 0.61 | 1.37 |
| 0.62 | 0.54 | 0.68 | 0.46 | 1.04 |
| 0.68 | 0.78 | 0.57 | 0.68 | 1.23 |
| 0.49 | 0.64 | 0.60 | 0.56 | 1.44 |
| 0.76 | 0.89 | 0.70 | 0.72 | 1.12 |
| 0.73 | 0.84 | 0.71 | 0.69 | 1.17 |
| 0.51 | 0.73 | 0.61 | 0.59 | 1.34 |
| 0.63 | 0.49 | 0.67 | 0.61 | 1.19 |
| 0.68 | 0.89 | 0.74 | 0.71 | 1.27 |
| 1.10 | 1.21 | 0.99 | 1.03 | 1.12 |
| 0.96 | 1.28 | 1.19 | 1.10 | 0.98 |
| 1.01 | 1.04 | 0.88 | 0.86 | 0.89 |



|      |      |      |      |      |
|------|------|------|------|------|
| 0.88 | 0.50 | 0.75 | 0.61 | 0.54 |
| 1.10 | 1.16 | 0.98 | 0.97 | 1.13 |
| 0.68 | 0.89 | 0.75 | 0.69 | 1.22 |
| 0.69 | 0.81 | 0.66 | 0.67 | 1.14 |
| 0.68 | 0.87 | 0.68 | 0.64 | 1.22 |
| 0.65 | 0.70 | 0.62 | 0.50 | 0.97 |
| 0.52 | 0.50 | 0.62 | 0.45 | 1.38 |
| 0.82 | 0.94 | 0.84 | 0.74 | 1.13 |
| 0.50 | 0.46 | 0.41 | 0.35 | 0.96 |
| 0.63 | 0.78 | 0.59 | 0.65 | 1.19 |
| 1.00 | 0.89 | 0.94 | 0.78 | 0.78 |
| 0.45 | 0.64 | 0.68 | 0.54 | 1.38 |
| 0.65 | 0.55 | 0.53 | 0.51 | 1.32 |
| 1.20 | 1.14 | 1.07 | 1.00 | 0.89 |
| 0.69 | 0.77 | 0.74 | 0.67 | 1.17 |
| 0.71 | 0.95 | 0.65 | 0.64 | 1.11 |
| 0.90 | 1.02 | 0.91 | 0.82 | 1.14 |
| 0.59 | 0.86 | 0.75 | 0.69 | 1.34 |
| 0.57 | 0.64 | 0.50 | 0.49 | 1.13 |
| 0.61 | 0.65 | 0.63 | 0.57 | 1.17 |
| 0.58 | 0.69 | 0.51 | 0.58 | 1.01 |
| 0.75 | 0.83 | 0.84 | 0.72 | 1.03 |
| 1.03 | 1.09 | 1.00 | 0.85 | 1.01 |
| 0.68 | 0.76 | 0.74 | 0.70 | 1.06 |
| 0.72 | 0.59 | 0.68 | 0.71 | 1.18 |
| 0.79 | 0.65 | 0.78 | 0.71 | 1.13 |
| 0.63 | 0.98 | 0.63 | 0.69 | 1.48 |
| 0.54 | 0.71 | 0.75 | 0.68 | 1.39 |
| 0.63 | 0.99 | 0.67 | 0.50 | 1.20 |
| 1.13 | 1.20 | 1.06 | 1.09 | 0.95 |
| 0.77 | 1.06 | 0.90 | 0.86 | 1.05 |
| 0.63 | 0.86 | 0.68 | 0.79 | 1.29 |
| 0.55 | 0.78 | 0.66 | 0.74 | 1.38 |
| 0.81 | 0.94 | 0.72 | 0.81 | 1.34 |
| 0.67 | 0.81 | 0.85 | 0.87 | 1.11 |
| 0.65 | 0.95 | 0.72 | 0.86 | 1.31 |
| 0.93 | 0.71 | 0.62 | 0.62 | 1.07 |
| 0.68 | 0.88 | 0.71 | 0.66 | 1.30 |
| 0.64 | 0.75 | 0.67 | 0.58 | 1.09 |

|      |      |      |      |      |
|------|------|------|------|------|
| 0.59 | 0.71 | 0.57 | 0.70 | 1.12 |
| 0.79 | 0.88 | 0.61 | 0.68 | 1.21 |
| 0.57 | 0.66 | 0.57 | 0.63 | 1.21 |
| 0.64 | 0.80 | 0.60 | 0.64 | 1.22 |
| 0.84 | 1.03 | 0.82 | 0.83 | 1.12 |
| 0.53 | 0.83 | 0.59 | 0.62 | 1.40 |
| 0.87 | 0.79 | 0.65 | 0.68 | 1.16 |
| 0.65 | 0.69 | 0.70 | 0.79 | 1.36 |
| 0.80 | 0.87 | 0.81 | 0.88 | 1.21 |
| 0.52 | 0.58 | 0.73 | 0.64 | 1.40 |
| 0.49 | 0.60 | 0.60 | 0.52 | 1.33 |
| 0.72 | 0.72 | 0.77 | 0.65 | 1.07 |
| 0.72 | 0.84 | 0.80 | 0.73 | 1.15 |
| 0.66 | 0.79 | 0.71 | 0.69 | 1.16 |
| 0.83 | 0.96 | 0.81 | 0.96 | 1.09 |
| 0.71 | 0.97 | 0.70 | 0.89 | 1.33 |
| 0.90 | 0.94 | 0.94 | 0.84 | 0.79 |
| 0.51 | 0.71 | 0.68 | 0.52 | 1.57 |
| 0.91 | 1.13 | 0.91 | 0.70 | 0.95 |
| 0.80 | 0.97 | 0.70 | 0.87 | 0.87 |
| 0.82 | 0.92 | 0.86 | 0.91 | 1.19 |
| 0.60 | 1.12 | 0.88 | 0.79 | 1.32 |
| 0.72 | 0.94 | 0.69 | 0.78 | 1.20 |
| 0.77 | 1.02 | 0.78 | 0.79 | 1.02 |
| 0.63 | 0.87 | 0.66 | 0.71 | 1.19 |
| 0.63 | 0.74 | 0.70 | 0.68 | 1.13 |
| 0.56 | 0.83 | 0.69 | 0.74 | 1.33 |
| 0.62 | 0.92 | 0.71 | 0.68 | 1.25 |
| 0.58 | 0.76 | 0.64 | 0.62 | 1.22 |
| 0.71 | 0.74 | 0.60 | 0.63 | 1.07 |
| 0.45 | 0.49 | 0.43 | 0.34 | 1.28 |
| 0.51 | 0.78 | 0.65 | 0.54 | 1.40 |
| 0.60 | 0.86 | 0.62 | 0.67 | 1.16 |
| 0.64 | 0.86 | 0.90 | 0.77 | 0.98 |
| 1.13 | 1.30 | 1.03 | 1.07 | 1.04 |
| 0.49 | 0.75 | 0.57 | 0.50 | 1.34 |
| 0.77 | 0.83 | 0.73 | 0.75 | 1.21 |
| 0.62 | 0.74 | 0.64 | 0.63 | 1.15 |
| 1.04 | 1.43 | 0.62 | 0.61 | 1.02 |

|      |      |      |      |      |
|------|------|------|------|------|
| 0.62 | 0.81 | 0.66 | 0.66 | 1.27 |
| 0.78 | 0.73 | 0.83 | 0.70 | 1.14 |
| 3.28 | 3.72 | 2.88 | 2.68 | 1.11 |
| 0.81 | 0.89 | 0.74 | 0.73 | 1.11 |
| 0.67 | 0.79 | 0.79 | 1.40 | 1.29 |
| 1.03 | 0.94 | 1.06 | 0.99 | 1.21 |
| 0.54 | 0.79 | 0.66 | 0.57 | 1.38 |
| 0.53 | 0.72 | 0.60 | 0.54 | 1.29 |
| 0.90 | 0.62 | 0.59 | 0.58 | 1.15 |
| 0.75 | 0.77 | 0.66 | 0.57 | 1.00 |
| 0.63 | 0.84 | 0.64 | 0.59 | 1.20 |
| 0.67 | 0.78 | 0.85 | 0.57 | 1.19 |
| 0.78 | 0.70 | 0.78 | 0.64 | 1.26 |
| 0.53 | 0.70 | 0.59 | 0.52 | 1.37 |
| 2.14 | 2.47 | 2.48 | 2.07 | 1.24 |
| 0.79 | 0.58 | 0.54 | 0.49 | 1.00 |
| 1.03 | 1.07 | 1.44 | 0.94 | 0.94 |
| 0.93 | 0.80 | 0.72 | 0.77 | 1.26 |
| 0.60 | 0.80 | 0.54 | 0.58 | 0.97 |
| 0.57 | 0.67 | 0.62 | 0.55 | 1.17 |
| 0.75 | 0.85 | 0.67 | 0.70 | 1.00 |
| 0.81 | 0.86 | 0.67 | 0.67 | 0.92 |
| 0.61 | 1.01 | 0.69 | 0.67 | 1.16 |
| 0.88 | 0.82 | 0.75 | 0.76 | 1.00 |
| 0.71 | 0.67 | 0.52 | 0.58 | 1.23 |
| 0.65 | 0.77 | 0.76 | 0.72 | 1.21 |
| 0.58 | 0.70 | 0.65 | 0.64 | 1.25 |
| 0.70 | 0.86 | 0.69 | 0.70 | 1.10 |
| 0.64 | 0.88 | 0.67 | 0.68 | 1.24 |
| 0.63 | 0.78 | 0.61 | 0.55 | 1.11 |
| 0.64 | 0.69 | 0.63 | 0.57 | 1.16 |
| 0.83 | 0.89 | 0.73 | 0.68 | 1.12 |
| 0.72 | 0.84 | 0.79 | 0.69 | 1.22 |
| 0.63 | 0.78 | 0.62 | 0.61 | 1.32 |
| 0.72 | 0.84 | 0.57 | 0.75 | 1.09 |
| 0.82 | 0.96 | 0.77 | 0.86 | 1.34 |
| 0.53 | 0.61 | 0.64 | 0.58 | 1.31 |
| 0.96 | 1.04 | 0.92 | 1.27 | 1.13 |
| 0.79 | 1.22 | 0.66 | 0.81 | 1.12 |

|      |      |      |      |      |
|------|------|------|------|------|
| 0.69 | 0.85 | 0.73 | 0.62 | 1.17 |
| 0.78 | 0.74 | 0.56 | 0.68 | 1.13 |
| 0.84 | 0.68 | 0.68 | 0.66 | 1.12 |
| 0.86 | 0.33 | 1.02 | 0.52 | 0.64 |
| 0.77 | 0.84 | 0.77 | 0.71 | 1.09 |
| 0.76 | 0.82 | 0.78 | 0.71 | 0.98 |
| 0.79 | 1.10 | 0.72 | 0.74 | 1.17 |
| 0.80 | 0.68 | 0.83 | 0.67 | 1.03 |
| 0.78 | 1.02 | 0.89 | 0.72 | 1.24 |
| 0.74 | 0.85 | 0.77 | 0.74 | 1.22 |
| 0.81 | 0.79 | 0.82 | 0.71 | 1.17 |
| 0.90 | 1.25 | 0.88 | 0.95 | 1.11 |
| 0.61 | 0.91 | 0.64 | 0.64 | 1.32 |
| 0.92 | 1.07 | 0.86 | 0.86 | 0.99 |
| 0.91 | 1.02 | 0.81 | 0.74 | 1.10 |
| 0.88 | 1.04 | 0.85 | 0.92 | 0.90 |
| 0.88 | 0.88 | 0.80 | 0.78 | 1.03 |
| 0.67 | 0.86 | 0.66 | 0.63 | 1.11 |
| 0.50 | 0.66 | 0.55 | 0.55 | 1.26 |
| 0.58 | 0.94 | 0.58 | 0.59 | 1.33 |
| 0.60 | 0.87 | 0.62 | 0.62 | 1.15 |
| 0.61 | 0.60 | 0.80 | 0.78 | 1.25 |
| 0.59 | 0.71 | 0.81 | 0.60 | 1.04 |
| 0.71 | 0.84 | 0.68 | 0.65 | 1.19 |
| 0.54 | 0.50 | 0.74 | 0.51 | 1.13 |
| 0.65 | 0.77 | 0.68 | 0.62 | 1.05 |
| 0.79 | 0.99 | 0.81 | 0.93 | 1.21 |
| 0.89 | 0.64 | 0.85 | 0.78 | 0.97 |
| 0.88 | 0.77 | 0.76 | 0.71 | 1.03 |
| 0.71 | 0.66 | 0.92 | 0.66 | 1.04 |
| 0.82 | 1.04 | 0.83 | 0.71 | 1.10 |
| 0.89 | 0.71 | 0.85 | 0.74 | 1.10 |
| 0.56 | 0.64 | 0.66 | 0.59 | 0.96 |
| 0.95 | 1.09 | 0.95 | 0.92 | 1.12 |
| 1.12 | 1.10 | 0.96 | 0.99 | 0.88 |
| 0.54 | 0.72 | 0.63 | 0.60 | 1.34 |
| 0.82 | 1.02 | 0.79 | 0.82 | 1.21 |
| 0.81 | 0.93 | 0.89 | 0.76 | 1.13 |
| 0.93 | 1.08 | 1.34 | 1.24 | 1.58 |

|      |      |      |      |      |
|------|------|------|------|------|
| 0.65 | 0.84 | 0.60 | 0.59 | 1.14 |
| 0.81 | 0.95 | 0.75 | 0.76 | 1.14 |
| 0.93 | 0.76 | 0.68 | 0.67 | 1.04 |
| 0.68 | 0.69 | 0.69 | 0.81 | 0.91 |
| 0.55 | 0.80 | 0.70 | 0.61 | 1.38 |
| 0.92 | 1.04 | 0.84 | 0.91 | 1.09 |
| 0.90 | 0.86 | 0.74 | 0.72 | 0.98 |
| 0.80 | 0.92 | 0.76 | 0.72 | 1.12 |
| 0.70 | 0.77 | 0.84 | 0.81 | 1.33 |
| 0.71 | 0.85 | 1.09 | 0.61 | 1.47 |
| 0.73 | 1.03 | 0.92 | 0.84 | 1.28 |
| 0.61 | 0.79 | 0.68 | 0.63 | 1.23 |
| 0.43 | 0.66 | 0.49 | 0.49 | 1.55 |
| 0.44 | 0.72 | 0.65 | 0.59 | 1.45 |
| 0.97 | 0.98 | 0.91 | 0.85 | 1.07 |
| 0.74 | 0.76 | 0.68 | 0.62 | 1.04 |
| 0.72 | 0.64 | 0.64 | 0.54 | 1.23 |
| 0.77 | 1.00 | 0.85 | 1.15 | 1.04 |
| 0.83 | 1.07 | 0.73 | 0.84 | 1.10 |
| 0.90 | 0.82 | 0.83 | 0.76 | 1.00 |
| 0.56 | 0.72 | 0.61 | 0.47 | 1.23 |
| 0.80 | 0.71 | 0.71 | 0.61 | 0.91 |
| 0.73 | 0.73 | 0.51 | 0.48 | 1.03 |
| 0.93 | 0.82 | 0.74 | 0.81 | 1.17 |
| 0.70 | 0.95 | 0.69 | 0.74 | 1.23 |
| 0.82 | 0.62 | 0.77 | 0.62 | 1.11 |
| 0.79 | 0.58 | 0.72 | 0.56 | 1.07 |
| 0.57 | 0.49 | 0.60 | 0.43 | 1.26 |
| 0.92 | 0.94 | 0.86 | 0.89 | 1.04 |
| 0.83 | 0.90 | 0.77 | 0.75 | 1.03 |
| 0.71 | 0.87 | 0.72 | 0.63 | 1.21 |
| 0.73 | 0.88 | 0.81 | 0.65 | 0.82 |
| 0.47 | 0.77 | 0.90 | 0.77 | 1.67 |
| 0.67 | 0.65 | 0.62 | 0.70 | 1.29 |
| 0.63 | 0.80 | 0.71 | 0.67 | 1.35 |
| 1.04 | 0.94 | 0.70 | 0.59 | 0.85 |
| 0.74 | 0.90 | 0.69 | 0.71 | 1.15 |
| 0.64 | 0.79 | 0.67 | 0.62 | 1.30 |
| 0.82 | 0.72 | 0.77 | 0.71 | 0.97 |

|      |      |      |      |      |
|------|------|------|------|------|
| 0.34 | 0.44 | 0.51 | 0.44 | 1.71 |
| 0.97 | 1.22 | 0.94 | 0.91 | 1.16 |
| 0.73 | 0.96 | 0.75 | 0.79 | 1.21 |
| 0.55 | 0.76 | 0.63 | 0.58 | 1.41 |
| 0.62 | 0.95 | 0.57 | 0.66 | 1.15 |
| 0.84 | 1.04 | 0.94 | 0.86 | 1.19 |
| 0.73 | 0.93 | 0.63 | 0.76 | 1.29 |
| 0.54 | 0.70 | 0.68 | 0.57 | 1.28 |
| 0.75 | 0.57 | 0.63 | 0.56 | 1.04 |
| 0.99 | 1.12 | 0.91 | 0.87 | 1.03 |
| 0.77 | 1.02 | 0.73 | 0.68 | 1.08 |
| 0.71 | 0.85 | 0.66 | 0.63 | 1.08 |
| 0.32 | 0.47 | 0.51 | 0.49 | 1.38 |
| 0.95 | 0.98 | 0.83 | 0.63 | 0.93 |
| 0.49 | 0.68 | 0.70 | 0.57 | 1.48 |
| 1.06 | 1.15 | 0.95 | 0.92 | 1.02 |
| 0.72 | 1.22 | 0.80 | 0.93 | 1.34 |
| 0.66 | 0.77 | 0.78 | 0.76 | 1.10 |
| 0.47 | 0.75 | 0.65 | 0.51 | 1.32 |
| 0.60 | 0.61 | 0.76 | 0.64 | 1.05 |
| 0.88 | 0.99 | 0.89 | 0.83 | 1.09 |
| 0.64 | 0.95 | 0.75 | 0.70 | 1.49 |
| 0.66 | 1.00 | 0.78 | 0.76 | 1.33 |
| 0.53 | 0.79 | 0.60 | 0.61 | 1.27 |
| 0.71 | 0.82 | 0.76 | 0.69 | 1.12 |
| 0.72 | 0.54 | 0.67 | 0.53 | 1.15 |
| 0.65 | 0.97 | 0.68 | 0.69 | 1.18 |
| 0.54 | 0.97 | 0.72 | 0.61 | 1.30 |
| 0.82 | 0.55 | 0.63 | 0.56 | 1.02 |
| 0.31 | 0.56 | 0.54 | 0.49 | 1.62 |
| 0.70 | 0.69 | 0.72 | 0.71 | 1.10 |
| 0.77 | 0.99 | 0.76 | 0.64 | 1.27 |
| 0.80 | 0.82 | 0.87 | 0.88 | 1.08 |
| 0.82 | 0.61 | 0.80 | 0.82 | 1.12 |
| 0.52 | 0.67 | 0.52 | 0.55 | 1.13 |
| 0.57 | 0.75 | 0.66 | 0.60 | 1.24 |
| 0.48 | 0.50 | 0.61 | 0.43 | 1.22 |
| 0.59 | 0.74 | 0.74 | 0.62 | 1.47 |
| 0.79 | 0.75 | 0.75 | 0.60 | 1.14 |

|      |      |      |      |      |
|------|------|------|------|------|
| 0.76 | 0.91 | 0.72 | 0.67 | 1.04 |
| 0.79 | 0.75 | 0.70 | 0.67 | 1.08 |
| 0.67 | 1.40 | 0.74 | 0.89 | 1.36 |
| 0.70 | 0.92 | 0.73 | 0.76 | 1.13 |
| 0.43 | 0.62 | 0.69 | 0.53 | 1.60 |
| 0.93 | 0.73 | 0.87 | 0.71 | 1.14 |
| 0.68 | 0.81 | 0.65 | 0.77 | 1.13 |
| 0.34 | 0.53 | 0.54 | 0.53 | 1.65 |
| 0.84 | 1.01 | 1.00 | 0.66 | 1.00 |
| 0.57 | 0.60 | 0.68 | 0.59 | 1.19 |
| 0.61 | 0.78 | 0.70 | 0.75 | 1.35 |
| 0.70 | 0.92 | 0.75 | 0.70 | 1.41 |
| 0.72 | 0.81 | 0.68 | 0.63 | 0.98 |
| 0.63 | 0.73 | 0.65 | 0.63 | 1.16 |
| 0.96 | 1.00 | 0.89 | 0.86 | 1.09 |
| 0.83 | 0.85 | 0.73 | 0.79 | 0.99 |
| 0.46 | 0.74 | 0.51 | 0.61 | 1.40 |
| 0.83 | 0.65 | 0.70 | 0.67 | 0.88 |
| 0.84 | 0.83 | 0.69 | 0.62 | 0.94 |
| 0.80 | 0.96 | 0.54 | 0.44 | 1.02 |
| 0.96 | 1.01 | 0.46 | 0.95 | 0.91 |
| 0.89 | 0.78 | 0.64 | 0.44 | 1.03 |
| 0.74 | 0.96 | 0.74 | 0.73 | 1.03 |
| 0.79 | 0.75 | 0.60 | 0.58 | 1.08 |
| 0.59 | 0.88 | 0.78 | 0.69 | 1.11 |
| 0.80 | 0.72 | 0.80 | 0.73 | 1.08 |
| 0.73 | 0.73 | 0.69 | 0.58 | 1.06 |
| 0.60 | 0.83 | 0.65 | 0.53 | 1.28 |
| 0.85 | 0.92 | 0.62 | 0.54 | 0.86 |
| 0.62 | 0.73 | 0.57 | 0.49 | 1.09 |
| 0.78 | 1.03 | 0.75 | 0.83 | 1.05 |
| 0.73 | 0.88 | 0.63 | 0.70 | 1.16 |
| 0.91 | 1.03 | 0.94 | 0.78 | 1.34 |
| 0.61 | 0.84 | 0.70 | 0.72 | 1.09 |
| 0.83 | 1.01 | 1.01 | 0.95 | 1.28 |
| 0.82 | 0.82 | 0.76 | 0.78 | 1.14 |
| 0.96 | 0.79 | 0.73 | 0.88 | 0.91 |
| 0.82 | 0.78 | 0.76 | 0.83 | 0.90 |
| 0.79 | 0.85 | 0.72 | 0.64 | 0.99 |

|      |      |      |      |      |
|------|------|------|------|------|
| 0.83 | 0.88 | 0.77 | 0.71 | 1.13 |
| 0.72 | 0.90 | 0.77 | 0.67 | 0.99 |
| 0.37 | 0.58 | 0.63 | 0.60 | 1.27 |
| 0.79 | 0.82 | 0.81 | 0.80 | 0.99 |
| 0.58 | 0.76 | 0.57 | 0.57 | 1.36 |
| 0.85 | 2.10 | 0.68 | 0.90 | 1.28 |
| 0.75 | 0.97 | 0.73 | 0.80 | 0.92 |
| 0.95 | 1.39 | 0.56 | 0.75 | 1.14 |
| 0.73 | 1.04 | 0.76 | 0.83 | 1.42 |
| 2.85 | 3.14 | 2.52 | 2.19 | 1.12 |
| 0.72 | 0.89 | 0.74 | 0.71 | 1.15 |
| 0.88 | 0.90 | 0.62 | 0.64 | 1.01 |
| 0.68 | 0.95 | 0.49 | 0.81 | 1.16 |
| 1.05 | 0.85 | 0.72 | 0.96 | 1.02 |
| 0.51 | 0.63 | 0.46 | 0.67 | 1.19 |
| 0.70 | 0.89 | 0.76 | 0.69 | 1.11 |
| 1.04 | 1.10 | 0.96 | 0.84 | 1.08 |
| 0.79 | 0.67 | 0.54 | 0.58 | 1.11 |
| 0.83 | 0.80 | 0.67 | 0.63 | 0.99 |
| 0.79 | 0.87 | 0.83 | 0.70 | 0.99 |
| 0.59 | 0.75 | 0.73 | 0.52 | 1.35 |
| 0.81 | 0.97 | 0.74 | 0.77 | 1.07 |
| 0.82 | 0.62 | 0.53 | 0.52 | 1.02 |
| 0.79 | 0.78 | 0.54 | 0.61 | 1.00 |
| 0.78 | 0.84 | 0.71 | 0.68 | 1.03 |
| 0.87 | 0.87 | 0.72 | 0.69 | 0.95 |
| 0.57 | 0.48 | 0.65 | 0.65 | 1.16 |
| 0.65 | 0.70 | 0.69 | 0.63 | 1.14 |
| 0.55 | 0.72 | 0.60 | 0.56 | 1.17 |
| 0.85 | 0.59 | 0.68 | 0.66 | 1.02 |
| 0.94 | 1.11 | 1.18 | 0.35 | 1.00 |
| 0.61 | 1.00 | 0.71 | 0.72 | 1.27 |
| 0.70 | 1.06 | 0.93 | 0.87 | 1.34 |
| 0.67 | 0.76 | 0.67 | 0.66 | 1.23 |
| 0.95 | 0.77 | 0.61 | 0.61 | 1.02 |
| 0.60 | 0.65 | 0.62 | 0.59 | 1.23 |
| 0.81 | 0.99 | 0.74 | 1.14 | 1.14 |
| 0.71 | 0.87 | 0.73 | 0.70 | 1.25 |
| 1.38 | 1.71 | 1.41 | 1.30 | 1.14 |



|      |      |      |      |      |
|------|------|------|------|------|
| 0.54 | 0.63 | 0.64 | 0.52 | 1.33 |
| 0.48 | 0.72 | 0.66 | 0.58 | 1.45 |
| 0.55 | 0.69 | 0.58 | 0.56 | 1.23 |
| 0.60 | 0.77 | 0.69 | 0.75 | 1.35 |
| 0.65 | 0.80 | 0.60 | 0.76 | 1.43 |
| 0.62 | 0.82 | 0.72 | 0.67 | 1.24 |
| 0.45 | 0.58 | 0.58 | 0.50 | 1.37 |
| 0.67 | 0.71 | 0.66 | 0.65 | 1.15 |
| 0.71 | 0.36 | 0.72 | 0.64 | 0.81 |
| 0.62 | 0.69 | 0.70 | 0.62 | 1.25 |
| 0.54 | 0.75 | 0.67 | 0.61 | 1.20 |
| 0.32 | 0.51 | 0.37 | 0.32 | 1.21 |
| 0.45 | 1.17 | 0.55 | 0.62 | 1.39 |
| 0.60 | 0.77 | 0.65 | 0.55 | 1.17 |
| 0.69 | 0.81 | 0.68 | 0.62 | 1.16 |
| 0.72 | 0.87 | 0.73 | 0.74 | 1.22 |
| 0.77 | 0.86 | 0.73 | 0.75 | 1.10 |
| 0.72 | 0.99 | 0.93 | 0.79 | 1.16 |
| 0.83 | 0.80 | 0.76 | 0.91 | 1.02 |
| 0.58 | 0.83 | 0.78 | 0.65 | 1.41 |
| 0.55 | 0.76 | 0.55 | 0.49 | 1.31 |
| 1.03 | 1.63 | 0.66 | 0.89 | 1.18 |
| 0.64 | 0.83 | 0.62 | 0.61 | 1.15 |
| 0.81 | 0.82 | 0.73 | 0.78 | 1.09 |
| 0.76 | 0.92 | 0.78 | 0.81 | 0.96 |
| 0.56 | 0.70 | 0.64 | 0.58 | 1.20 |
| 0.79 | 0.97 | 0.87 | 0.74 | 1.17 |
| 1.02 | 1.31 | 1.24 | 1.65 | 1.10 |
| 0.74 | 0.77 | 0.76 | 0.59 | 0.87 |
| 0.95 | 0.79 | 0.88 | 0.70 | 0.91 |
| 0.76 | 0.91 | 0.72 | 0.68 | 1.22 |
| 0.63 | 0.92 | 0.72 | 0.71 | 1.14 |
| 0.94 | 0.98 | 0.92 | 1.17 | 1.06 |
| 0.76 | 0.88 | 0.74 | 0.66 | 1.15 |
| 0.63 | 0.29 | 0.60 | 0.50 | 0.50 |
| 0.79 | 0.84 | 0.75 | 0.76 | 1.03 |
| 0.58 | 0.75 | 0.66 | 0.47 | 1.24 |
| 0.82 | 1.00 | 0.96 | 0.79 | 1.21 |
| 0.68 | 0.93 | 0.75 | 0.73 | 1.21 |

|      |      |      |      |      |
|------|------|------|------|------|
| 0.83 | 1.33 | 0.89 | 0.93 | 1.19 |
| 0.86 | 0.94 | 0.82 | 0.80 | 1.01 |
| 0.81 | 0.86 | 0.73 | 0.72 | 1.05 |
| 0.84 | 0.92 | 0.81 | 0.68 | 1.12 |
| 0.97 | 1.18 | 0.87 | 0.89 | 0.96 |
| 0.76 | 0.77 | 0.66 | 0.71 | 1.09 |
| 0.92 | 1.03 | 0.80 | 0.79 | 1.09 |
| 0.83 | 0.69 | 0.75 | 0.72 | 1.12 |
| 0.53 | 0.68 | 0.58 | 0.59 | 1.29 |
| 0.84 | 0.98 | 0.82 | 0.74 | 1.13 |
| 0.59 | 0.60 | 0.60 | 0.48 | 0.99 |
| 0.78 | 0.97 | 0.74 | 0.75 | 0.89 |
| 0.61 | 0.87 | 0.57 | 0.59 | 1.12 |
| 0.58 | 0.78 | 0.59 | 0.62 | 1.32 |
| 0.54 | 0.77 | 0.63 | 0.62 | 1.28 |
| 0.76 | 0.91 | 0.82 | 0.77 | 1.69 |
| 0.84 | 0.89 | 0.76 | 0.78 | 1.13 |
| 0.81 | 0.59 | 0.68 | 0.55 | 0.96 |
| 0.61 | 0.75 | 0.73 | 0.63 | 1.16 |
| 0.65 | 0.77 | 0.70 | 0.64 | 0.90 |
| 0.61 | 0.98 | 0.62 | 0.68 | 1.31 |
| 0.55 | 0.70 | 0.60 | 0.56 | 1.25 |
| 1.04 | 1.26 | 1.01 | 0.97 | 1.10 |
| 0.73 | 0.81 | 0.72 | 0.71 | 1.18 |
| 1.00 | 0.97 | 0.99 | 0.87 | 1.07 |
| 0.61 | 0.95 | 0.80 | 0.67 | 1.35 |
| 0.87 | 0.76 | 0.73 | 0.65 | 1.05 |
| 0.72 | 1.03 | 0.75 | 0.77 | 1.17 |
| 0.63 | 0.70 | 0.59 | 0.58 | 1.21 |
| 0.85 | 0.93 | 0.79 | 0.84 | 1.13 |
| 0.62 | 0.89 | 0.51 | 0.60 | 0.99 |
| 0.83 | 0.83 | 0.77 | 0.69 | 1.13 |
| 0.71 | 1.07 | 0.80 | 0.87 | 1.39 |
| 0.53 | 0.66 | 0.58 | 0.40 | 1.37 |
| 0.94 | 1.01 | 1.01 | 0.91 | 1.17 |
| 0.85 | 0.65 | 0.60 | 0.62 | 1.15 |
| 0.82 | 0.90 | 0.88 | 0.77 | 1.08 |
| 0.48 | 0.68 | 0.61 | 0.54 | 1.35 |
| 0.53 | 0.54 | 0.59 | 0.44 | 1.14 |

|      |      |      |      |      |
|------|------|------|------|------|
| 0.80 | 0.93 | 0.75 | 0.68 | 1.15 |
| 0.60 | 0.78 | 0.72 | 0.65 | 1.26 |
| 0.76 | 0.84 | 0.65 | 0.64 | 1.03 |
| 0.72 | 0.74 | 0.69 | 0.68 | 1.27 |
| 0.66 | 0.75 | 0.72 | 0.64 | 1.21 |
| 0.88 | 0.89 | 0.71 | 0.77 | 0.95 |
| 0.57 | 0.86 | 0.62 | 0.57 | 1.40 |
| 0.72 | 0.90 | 0.67 | 0.69 | 1.19 |
| 0.61 | 0.72 | 0.61 | 0.62 | 1.20 |
| 0.66 | 0.88 | 0.77 | 0.75 | 1.22 |
| 0.86 | 0.83 | 0.72 | 0.75 | 1.09 |
| 0.78 | 0.88 | 0.69 | 0.53 | 1.11 |
| 0.60 | 0.71 | 0.62 | 0.57 | 1.23 |
| 0.77 | 0.94 | 0.80 | 0.80 | 1.18 |
| 0.68 | 0.87 | 0.70 | 0.72 | 1.19 |
| 0.80 | 0.85 | 0.69 | 0.76 | 1.03 |
| 0.56 | 0.73 | 0.68 | 0.60 | 1.39 |
| 0.64 | 0.73 | 0.66 | 0.62 | 1.10 |
| 0.56 | 0.81 | 0.64 | 0.62 | 1.25 |
| 0.78 | 0.92 | 1.01 | 0.71 | 1.43 |
| 0.71 | 0.85 | 0.70 | 0.71 | 1.13 |
| 0.75 | 0.69 | 0.66 | 0.59 | 1.22 |
| 0.71 | 0.78 | 0.51 | 0.52 | 0.98 |
| 0.48 | 0.56 | 0.62 | 0.55 | 1.26 |
| 0.69 | 1.32 | 0.98 | 0.97 | 1.03 |
| 0.86 | 0.98 | 0.81 | 0.65 | 1.07 |
| 0.71 | 0.91 | 0.75 | 0.67 | 1.41 |
| 0.63 | 0.74 | 0.69 | 0.59 | 1.26 |
| 0.67 | 0.94 | 0.73 | 0.66 | 1.36 |
| 0.92 | 0.79 | 0.93 | 0.88 | 1.13 |
| 0.70 | 1.11 | 0.78 | 0.93 | 1.23 |
| 0.68 | 0.72 | 0.96 | 0.59 | 1.40 |
| 0.52 | 0.74 | 0.64 | 0.52 | 1.30 |
| 0.54 | 0.78 | 0.52 | 0.61 | 1.50 |
| 0.68 | 0.90 | 0.70 | 0.73 | 1.10 |
| 0.81 | 0.96 | 0.65 | 0.85 | 1.00 |
| 0.65 | 0.69 | 0.67 | 0.64 | 1.00 |
| 0.64 | 0.79 | 0.58 | 0.62 | 1.47 |
| 0.61 | 0.92 | 0.75 | 0.70 | 1.65 |

|      |      |      |      |      |
|------|------|------|------|------|
| 0.87 | 0.77 | 0.88 | 0.81 | 1.11 |
| 0.83 | 0.92 | 0.77 | 0.66 | 1.08 |
| 0.57 | 0.81 | 0.82 | 0.76 | 1.30 |
| 0.69 | 0.77 | 0.57 | 0.64 | 0.80 |
| 0.55 | 0.96 | 0.63 | 0.59 | 1.33 |
| 0.72 | 1.04 | 0.67 | 0.79 | 1.29 |
| 0.63 | 0.80 | 0.72 | 0.66 | 1.25 |
| 0.63 | 0.86 | 0.54 | 0.51 | 1.15 |
| 0.52 | 0.55 | 0.55 | 0.25 | 0.96 |
| 0.75 | 0.83 | 0.71 | 0.80 | 1.16 |
| 0.66 | 0.78 | 0.78 | 0.64 | 1.03 |
| 0.92 | 1.00 | 0.80 | 0.84 | 1.00 |
| 0.87 | 1.05 | 0.68 | 0.69 | 1.07 |
| 0.75 | 0.95 | 0.60 | 0.57 | 1.15 |
| 0.93 | 0.79 | 0.61 | 0.58 | 0.74 |
| 0.91 | 0.86 | 0.70 | 0.70 | 1.20 |
| 1.11 | 1.12 | 0.84 | 1.28 | 1.03 |
| 0.57 | 0.78 | 0.63 | 0.56 | 1.35 |
| 0.46 | 0.62 | 0.62 | 0.56 | 1.35 |
| 0.71 | 0.77 | 0.72 | 0.82 | 1.23 |
| 0.79 | 1.07 | 0.76 | 0.76 | 1.11 |
| 0.66 | 0.78 | 0.70 | 0.67 | 1.08 |
| 0.87 | 0.82 | 0.80 | 0.71 | 1.04 |
| 0.64 | 0.68 | 0.67 | 0.56 | 1.17 |
| 0.78 | 0.98 | 0.93 | 0.94 | 1.17 |
| 0.88 | 0.98 | 1.36 | 1.17 | 1.36 |
| 0.74 | 0.93 | 0.71 | 0.68 | 1.15 |
| 0.64 | 0.67 | 0.64 | 0.60 | 1.07 |
| 0.89 | 0.84 | 0.85 | 0.81 | 1.10 |
| 0.68 | 0.71 | 0.68 | 0.71 | 1.01 |
| 0.99 | 0.98 | 0.69 | 0.68 | 0.80 |
| 0.84 | 0.93 | 0.82 | 0.79 | 1.09 |
| 0.48 | 0.83 | 0.65 | 0.50 | 1.61 |
| 0.72 | 0.96 | 0.74 | 0.79 | 1.36 |
| 0.60 | 0.75 | 0.67 | 0.66 | 1.25 |
| 0.92 | 0.98 | 0.72 | 0.62 | 0.87 |
| 0.95 | 1.11 | 1.03 | 0.84 | 1.04 |
| 0.82 | 0.93 | 0.77 | 0.73 | 1.17 |
| 0.82 | 0.91 | 0.72 | 0.82 | 1.12 |

|      |      |      |      |      |
|------|------|------|------|------|
| 0.71 | 0.81 | 0.71 | 0.77 | 1.15 |
| 0.63 | 0.63 | 0.68 | 0.58 | 1.13 |
| 0.58 | 0.73 | 0.61 | 0.57 | 1.21 |
| 0.70 | 0.81 | 0.61 | 0.68 | 1.14 |
| 0.84 | 0.59 | 0.77 | 0.70 | 1.11 |
| 0.76 | 1.01 | 0.76 | 0.79 | 1.11 |
| 0.85 | 0.94 | 0.77 | 0.67 | 0.95 |
| 0.66 | 0.76 | 0.63 | 0.61 | 1.06 |
| 0.79 | 0.83 | 0.65 | 0.62 | 0.97 |
| 0.74 | 0.56 | 0.55 | 0.53 | 1.09 |
| 0.51 | 0.58 | 0.60 | 0.55 | 1.25 |
| 0.69 | 0.92 | 0.70 | 0.60 | 1.25 |
| 0.83 | 0.70 | 0.72 | 0.63 | 1.31 |
| 0.62 | 0.92 | 0.68 | 0.69 | 1.33 |
| 0.56 | 0.85 | 0.74 | 0.59 | 1.42 |
| 0.73 | 0.78 | 0.70 | 0.69 | 1.14 |
| 0.74 | 0.55 | 0.71 | 0.65 | 1.17 |
| 0.76 | 0.87 | 0.72 | 0.71 | 1.12 |
| 0.55 | 0.67 | 0.54 | 0.52 | 1.16 |
| 0.65 | 0.80 | 0.64 | 0.55 | 1.15 |
| 0.58 | 0.69 | 0.62 | 0.60 | 1.21 |
| 0.49 | 0.72 | 0.62 | 0.55 | 1.37 |
| 0.69 | 0.69 | 0.62 | 0.60 | 1.14 |
| 0.64 | 0.57 | 0.55 | 0.55 | 1.31 |
| 0.97 | 1.02 | 0.78 | 0.75 | 0.64 |
| 1.00 | 1.25 | 0.94 | 1.00 | 1.20 |
| 0.62 | 0.66 | 0.72 | 0.64 | 1.23 |
| 0.74 | 0.80 | 0.73 | 0.72 | 1.12 |
| 0.92 | 0.68 | 0.59 | 0.61 | 0.99 |
| 0.62 | 0.69 | 0.65 | 0.60 | 1.22 |
| 0.84 | 0.69 | 0.75 | 0.61 | 1.00 |
| 0.72 | 0.91 | 0.60 | 0.61 | 0.95 |
| 0.83 | 1.10 | 0.89 | 0.85 | 1.15 |
| 0.68 | 0.84 | 0.84 | 0.75 | 1.02 |
| 0.80 | 0.84 | 0.72 | 0.68 | 1.03 |
| 0.71 | 1.43 | 0.76 | 0.81 | 1.26 |
| 0.72 | 0.81 | 0.69 | 0.66 | 1.12 |
| 0.64 | 0.71 | 0.69 | 0.66 | 1.20 |
| 0.58 | 0.78 | 0.70 | 0.52 | 1.21 |

|      |      |      |      |      |
|------|------|------|------|------|
| 2.49 | 3.24 | 2.82 | 2.48 | 1.23 |
| 0.52 | 0.44 | 0.61 | 0.58 | 1.31 |
| 0.51 | 0.71 | 0.62 | 0.65 | 1.34 |
| 0.87 | 1.02 | 0.84 | 1.06 | 1.12 |
| 0.73 | 0.99 | 0.61 | 0.94 | 1.14 |
| 0.68 | 1.06 | 0.78 | 0.62 | 1.25 |
| 0.70 | 0.88 | 0.69 | 0.78 | 1.17 |
| 0.64 | 0.80 | 0.53 | 0.73 | 1.35 |
| 0.57 | 0.80 | 0.62 | 0.59 | 1.29 |
| 0.66 | 0.75 | 0.82 | 0.83 | 1.20 |
| 0.63 | 0.88 | 0.63 | 0.47 | 0.98 |
| 0.80 | 0.80 | 0.74 | 0.73 | 1.27 |
| 0.83 | 0.80 | 0.63 | 0.57 | 0.92 |
| 0.73 | 0.98 | 0.78 | 0.70 | 1.16 |
| 0.86 | 1.03 | 1.00 | 0.86 | 1.14 |
| 1.04 | 0.84 | 0.78 | 0.97 | 0.86 |
| 0.59 | 0.74 | 0.56 | 0.54 | 1.09 |
| 0.74 | 0.88 | 0.75 | 0.73 | 1.13 |
| 0.74 | 0.94 | 0.72 | 0.64 | 1.17 |
| 1.00 | 0.92 | 0.70 | 0.69 | 1.04 |
| 0.68 | 0.83 | 0.94 | 0.74 | 1.43 |
| 0.53 | 0.79 | 0.64 | 0.61 | 1.30 |
| 0.51 | 0.87 | 0.57 | 0.52 | 1.30 |
| 0.57 | 0.75 | 0.63 | 0.58 | 1.28 |
| 0.90 | 0.91 | 0.86 | 1.35 | 1.02 |
| 0.61 | 0.68 | 0.56 | 0.45 | 1.31 |
| 0.64 | 0.83 | 0.62 | 0.65 | 1.25 |
| 0.63 | 0.72 | 0.69 | 0.71 | 1.26 |
| 0.71 | 0.86 | 0.68 | 0.65 | 1.15 |
| 0.65 | 1.04 | 0.76 | 0.76 | 1.30 |
| 0.93 | 0.69 | 0.68 | 0.68 | 1.12 |
| 0.50 | 0.49 | 0.73 | 0.55 | 1.56 |
| 0.92 | 0.94 | 0.87 | 0.89 | 0.80 |
| 0.96 | 1.05 | 1.02 | 1.00 | 1.22 |
| 0.80 | 0.94 | 0.79 | 0.85 | 1.11 |
| 0.79 | 0.89 | 0.74 | 0.88 | 1.11 |
| 0.77 | 0.95 | 0.70 | 0.58 | 1.06 |
| 0.63 | 0.74 | 0.70 | 0.68 | 1.28 |
| 0.83 | 0.69 | 0.66 | 0.66 | 1.04 |

|      |      |      |      |      |
|------|------|------|------|------|
| 0.97 | 0.83 | 1.05 | 0.95 | 1.05 |
| 0.79 | 0.76 | 0.69 | 0.73 | 1.00 |
| 0.94 | 0.99 | 0.71 | 0.85 | 1.04 |
| 0.76 | 0.55 | 0.77 | 0.74 | 1.12 |
| 0.60 | 0.98 | 0.73 | 0.77 | 1.05 |
| 0.70 | 0.79 | 0.70 | 0.69 | 1.19 |
| 0.80 | 0.94 | 0.98 | 0.92 | 1.36 |
| 0.70 | 0.86 | 0.70 | 0.65 | 1.21 |
| 0.67 | 0.92 | 0.72 | 0.71 | 1.22 |
| 0.72 | 0.79 | 0.80 | 0.82 | 1.19 |
| 0.72 | 0.77 | 0.63 | 0.56 | 1.30 |
| 0.78 | 0.72 | 0.75 | 0.61 | 1.13 |
| 0.62 | 0.71 | 0.55 | 0.53 | 1.14 |
| 0.78 | 0.83 | 0.81 | 0.86 | 1.22 |
| 0.76 | 0.87 | 0.79 | 0.70 | 1.13 |
| 0.82 | 0.89 | 0.70 | 0.80 | 1.03 |
| 1.08 | 1.04 | 0.85 | 0.81 | 1.00 |
| 0.64 | 0.60 | 0.54 | 0.56 | 1.30 |
| 0.88 | 0.93 | 0.64 | 0.82 | 1.05 |
| 0.63 | 0.80 | 0.67 | 0.62 | 1.24 |
| 0.71 | 0.91 | 0.68 | 0.71 | 1.07 |
| 0.70 | 0.91 | 0.74 | 0.73 | 1.16 |
| 0.48 | 0.64 | 0.53 | 0.67 | 1.44 |
| 0.51 | 0.91 | 0.65 | 0.58 | 1.42 |
| 0.57 | 0.70 | 0.61 | 0.61 | 1.36 |
| 0.78 | 0.92 | 0.77 | 0.65 | 1.31 |
| 0.81 | 0.80 | 0.75 | 0.69 | 0.98 |
| 0.68 | 0.85 | 0.78 | 0.71 | 1.08 |
| 0.86 | 1.02 | 0.71 | 0.82 | 1.20 |
| 0.65 | 0.93 | 0.68 | 0.62 | 1.30 |
| 0.63 | 0.78 | 0.72 | 0.76 | 1.29 |
| 0.68 | 0.88 | 0.90 | 0.70 | 1.41 |
| 0.74 | 0.69 | 0.71 | 0.58 | 1.07 |
| 0.71 | 1.49 | 0.74 | 0.58 | 1.48 |
| 0.53 | 0.64 | 0.63 | 0.50 | 1.11 |
| 0.68 | 0.88 | 0.72 | 0.69 | 1.17 |
| 0.57 | 0.71 | 0.61 | 0.56 | 1.24 |
| 0.55 | 0.81 | 0.59 | 0.47 | 1.49 |
| 0.91 | 1.08 | 1.00 | 0.94 | 0.93 |

|      |      |      |      |      |
|------|------|------|------|------|
| 0.46 | 0.48 | 0.62 | 0.51 | 1.29 |
| 0.73 | 0.94 | 0.77 | 0.70 | 1.20 |
| 0.71 | 0.74 | 0.75 | 0.79 | 1.22 |
| 0.74 | 1.06 | 0.88 | 0.82 | 1.14 |
| 0.42 | 0.52 | 0.58 | 0.49 | 1.43 |
| 0.73 | 1.07 | 0.82 | 0.72 | 1.23 |
| 0.73 | 0.58 | 0.59 | 0.61 | 0.84 |
| 0.60 | 0.80 | 0.51 | 0.40 | 1.16 |
| 0.77 | 0.82 | 0.79 | 1.16 | 1.03 |
| 0.34 | 0.71 | 0.61 | 0.54 | 2.09 |
| 0.73 | 0.60 | 0.70 | 0.63 | 1.16 |
| 0.93 | 1.11 | 0.90 | 0.82 | 1.09 |
| 0.71 | 1.03 | 1.09 | 0.93 | 1.21 |
| 0.68 | 0.82 | 0.53 | 0.68 | 1.16 |
| 0.65 | 0.83 | 0.69 | 0.65 | 1.28 |
| 0.63 | 0.79 | 0.69 | 0.65 | 1.15 |
| 0.62 | 0.81 | 0.69 | 0.67 | 1.37 |
| 0.62 | 0.76 | 0.62 | 0.62 | 1.22 |
| 0.77 | 0.98 | 0.76 | 0.91 | 1.05 |
| 0.60 | 0.66 | 0.63 | 0.67 | 1.06 |
| 0.85 | 0.92 | 0.89 | 0.93 | 1.27 |
| 0.50 | 0.61 | 0.64 | 0.58 | 1.31 |
| 0.75 | 0.99 | 0.69 | 0.93 | 1.28 |
| 6.28 | 7.98 | 6.69 | 5.80 | 1.19 |
| 0.79 | 0.89 | 0.73 | 0.74 | 1.02 |
| 0.90 | 0.95 | 0.83 | 0.89 | 1.06 |
| 0.74 | 0.88 | 0.72 | 0.63 | 1.07 |
| 0.76 | 0.80 | 0.76 | 0.79 | 1.17 |
| 0.64 | 0.94 | 0.65 | 0.54 | 1.16 |
| 0.60 | 0.87 | 0.57 | 0.60 | 1.10 |
| 0.54 | 0.61 | 0.63 | 0.55 | 1.23 |
| 0.75 | 0.92 | 0.82 | 0.81 | 1.23 |
| 0.61 | 0.56 | 0.55 | 0.39 | 0.83 |
| 0.71 | 0.67 | 0.68 | 0.56 | 1.07 |
| 0.59 | 0.71 | 0.69 | 0.58 | 1.23 |
| 0.70 | 0.99 | 0.68 | 0.61 | 1.18 |
| 0.73 | 0.52 | 0.71 | 0.62 | 1.09 |
| 0.41 | 0.88 | 0.75 | 0.74 | 2.38 |
| 0.63 | 0.90 | 0.60 | 0.57 | 1.24 |



|      |      |      |      |      |
|------|------|------|------|------|
| 0.54 | 0.70 | 0.61 | 0.57 | 1.22 |
| 0.81 | 1.02 | 0.89 | 0.79 | 1.17 |
| 0.73 | 0.78 | 1.08 | 0.62 | 1.25 |
| 0.64 | 0.80 | 0.62 | 0.74 | 1.34 |
| 0.49 | 0.58 | 0.58 | 0.56 | 1.39 |
| 0.71 | 0.84 | 0.74 | 0.62 | 1.13 |
| 0.85 | 0.59 | 0.64 | 0.61 | 1.09 |
| 0.83 | 0.96 | 0.74 | 1.05 | 1.14 |
| 0.84 | 0.80 | 0.77 | 0.90 | 0.90 |
| 0.62 | 0.73 | 0.64 | 0.65 | 1.20 |
| 0.90 | 1.23 | 1.01 | 1.06 | 1.20 |
| 0.81 | 0.87 | 0.74 | 0.74 | 1.06 |
| 0.91 | 1.03 | 0.89 | 0.99 | 1.09 |
| 0.80 | 0.84 | 0.74 | 0.72 | 1.05 |
| 0.88 | 0.95 | 0.96 | 0.84 | 1.12 |
| 0.65 | 0.86 | 0.68 | 0.64 | 1.31 |
| 0.74 | 0.87 | 0.65 | 0.63 | 1.30 |
| 0.74 | 0.80 | 0.69 | 0.63 | 1.03 |
| 0.78 | 0.82 | 0.65 | 0.80 | 1.09 |
| 0.68 | 0.89 | 0.68 | 0.75 | 1.29 |
| 0.73 | 0.67 | 0.69 | 0.72 | 0.96 |
| 0.66 | 0.76 | 0.65 | 0.63 | 1.22 |
| 0.63 | 0.72 | 0.63 | 0.64 | 1.08 |
| 0.24 | 0.98 | 0.76 | 0.72 | 3.54 |
| 0.56 | 0.72 | 0.62 | 0.59 | 1.25 |
| 0.66 | 0.73 | 0.67 | 0.56 | 1.20 |
| 0.91 | 1.00 | 0.91 | 0.96 | 1.10 |
| 0.93 | 1.16 | 0.82 | 0.86 | 0.98 |
| 0.83 | 0.93 | 0.80 | 0.84 | 1.07 |
| 1.89 | 2.26 | 1.60 | 1.06 | 1.27 |
| 0.67 | 0.73 | 0.71 | 0.64 | 1.12 |
| 0.67 | 0.88 | 0.64 | 0.60 | 1.21 |
| 0.71 | 0.87 | 0.73 | 0.73 | 1.16 |
| 0.70 | 0.53 | 0.55 | 0.48 | 1.06 |
| 0.69 | 0.72 | 0.66 | 0.65 | 1.03 |
| 0.80 | 1.00 | 0.75 | 0.53 | 1.14 |
| 0.71 | 0.94 | 0.66 | 0.71 | 1.10 |
| 0.75 | 0.88 | 0.70 | 0.65 | 1.09 |
| 0.73 | 0.78 | 0.73 | 0.74 | 1.15 |

|      |      |      |      |      |
|------|------|------|------|------|
| 0.78 | 0.91 | 0.89 | 0.78 | 1.07 |
| 0.76 | 0.85 | 0.80 | 0.78 | 1.06 |
| 0.66 | 0.83 | 0.68 | 0.78 | 1.13 |
| 2.44 | 2.89 | 2.15 | 1.89 | 1.18 |
| 0.73 | 0.82 | 0.75 | 0.76 | 1.15 |
| 0.73 | 0.92 | 0.69 | 0.67 | 1.14 |
| 0.76 | 0.61 | 0.74 | 0.69 | 1.03 |
| 0.76 | 0.98 | 0.72 | 0.74 | 1.29 |
| 0.50 | 1.01 | 0.68 | 0.54 | 1.67 |
| 0.77 | 0.82 | 0.75 | 0.73 | 1.20 |
| 0.55 | 0.73 | 0.61 | 0.59 | 1.33 |
| 0.71 | 0.81 | 0.79 | 0.60 | 0.97 |
| 0.74 | 0.66 | 0.52 | 0.50 | 0.96 |
| 0.62 | 0.72 | 0.65 | 0.58 | 1.15 |
| 0.68 | 0.76 | 0.65 | 0.63 | 1.08 |
| 0.89 | 1.25 | 0.84 | 1.01 | 0.82 |
| 0.86 | 0.84 | 1.22 | 0.68 | 0.90 |
| 0.74 | 0.61 | 0.69 | 0.65 | 1.22 |
| 0.71 | 1.13 | 0.76 | 0.81 | 1.25 |
| 0.79 | 1.02 | 0.69 | 0.66 | 1.29 |
| 0.82 | 1.39 | 0.95 | 1.17 | 1.51 |
| 0.70 | 0.76 | 0.64 | 0.58 | 1.03 |
| 0.69 | 0.80 | 0.71 | 0.66 | 1.16 |
| 0.60 | 0.77 | 0.52 | 0.60 | 1.32 |
| 0.73 | 0.88 | 0.70 | 0.70 | 1.20 |
| 0.67 | 0.94 | 0.77 | 0.69 | 1.23 |
| 0.66 | 0.72 | 0.61 | 0.52 | 1.09 |
| 0.48 | 0.68 | 0.58 | 0.56 | 1.46 |
| 0.62 | 0.74 | 0.62 | 0.60 | 1.17 |
| 0.89 | 1.00 | 0.83 | 0.86 | 1.08 |
| 0.98 | 0.99 | 0.56 | 0.92 | 0.75 |
| 0.53 | 0.72 | 0.51 | 0.48 | 1.27 |
| 0.45 | 0.55 | 0.66 | 0.52 | 1.49 |
| 0.97 | 0.75 | 0.79 | 1.21 | 1.23 |
| 0.37 | 0.59 | 0.47 | 0.47 | 1.78 |
| 0.85 | 0.87 | 0.72 | 0.72 | 0.96 |
| 0.75 | 0.80 | 0.55 | 0.66 | 0.85 |
| 0.53 | 0.69 | 0.60 | 0.54 | 1.22 |
| 0.79 | 0.83 | 0.84 | 0.68 | 1.09 |

|      |      |      |      |      |
|------|------|------|------|------|
| 0.82 | 0.88 | 0.82 | 0.86 | 0.91 |
| 0.28 | 0.43 | 1.09 | 0.40 | 1.53 |
| 0.48 | 0.64 | 0.61 | 0.62 | 1.30 |
| 0.61 | 0.77 | 0.60 | 0.53 | 1.23 |
| 0.80 | 0.88 | 0.74 | 0.70 | 1.01 |
| 0.70 | 0.84 | 0.78 | 0.63 | 1.20 |
| 0.64 | 0.81 | 0.66 | 0.66 | 1.23 |
| 0.59 | 0.69 | 0.63 | 0.55 | 1.18 |
| 0.68 | 0.83 | 0.65 | 0.64 | 1.13 |
| 0.74 | 0.88 | 0.72 | 0.75 | 1.05 |
| 0.56 | 0.80 | 1.41 | 0.66 | 1.10 |
| 1.06 | 1.25 | 1.03 | 0.91 | 1.02 |
| 0.70 | 0.77 | 0.69 | 0.66 | 1.07 |
| 0.69 | 0.76 | 0.69 | 0.66 | 1.03 |
| 0.87 | 1.05 | 0.89 | 0.86 | 1.17 |
| 0.84 | 0.71 | 0.78 | 0.78 | 1.08 |
| 0.74 | 0.92 | 0.74 | 0.65 | 1.26 |
| 0.64 | 0.79 | 0.66 | 0.62 | 1.10 |
| 0.76 | 0.68 | 0.78 | 0.84 | 1.10 |
| 1.10 | 0.93 | 1.12 | 0.62 | 1.03 |
| 0.60 | 0.96 | 0.68 | 0.57 | 1.26 |
| 0.89 | 0.90 | 0.84 | 0.81 | 1.09 |
| 0.93 | 0.69 | 0.62 | 0.64 | 1.01 |
| 0.48 | 0.76 | 0.64 | 0.63 | 1.46 |
| 0.56 | 0.71 | 0.67 | 0.63 | 1.25 |
| 0.64 | 0.61 | 0.38 | 0.74 | 1.02 |
| 0.64 | 0.83 | 0.69 | 0.63 | 1.17 |
| 0.63 | 0.86 | 0.84 | 0.86 | 1.37 |
| 0.87 | 0.91 | 0.72 | 0.71 | 0.98 |
| 0.51 | 0.73 | 0.62 | 0.55 | 1.35 |
| 0.34 | 0.37 | 0.38 | 0.35 | 1.34 |
| 0.77 | 1.61 | 0.74 | 0.65 | 1.50 |
| 0.95 | 0.80 | 0.65 | 0.84 | 1.10 |
| 0.95 | 0.75 | 0.69 | 0.72 | 1.23 |
| 0.93 | 0.73 | 0.63 | 0.67 | 1.08 |
| 0.74 | 0.90 | 0.69 | 0.71 | 1.02 |
| 0.80 | 0.83 | 0.77 | 0.78 | 1.16 |
| 0.89 | 0.92 | 0.97 | 1.19 | 1.24 |
| 0.57 | 0.96 | 0.66 | 0.64 | 1.26 |

|      |      |      |      |      |
|------|------|------|------|------|
| 0.97 | 0.73 | 0.64 | 0.65 | 1.03 |
| 0.55 | 0.67 | 0.63 | 0.59 | 1.32 |
| 1.01 | 0.67 | 1.10 | 0.83 | 1.10 |
| 0.59 | 0.75 | 0.65 | 0.65 | 1.24 |
| 0.94 | 0.76 | 0.62 | 0.65 | 0.98 |
| 0.82 | 0.60 | 0.79 | 0.67 | 1.10 |
| 0.58 | 0.69 | 0.69 | 0.59 | 1.32 |
| 0.65 | 0.62 | 0.75 | 0.62 | 1.25 |
| 0.71 | 0.89 | 0.72 | 0.72 | 1.17 |
| 0.59 | 0.79 | 0.65 | 0.63 | 1.30 |
| 0.65 | 0.89 | 0.69 | 0.63 | 1.19 |
| 0.85 | 1.07 | 0.86 | 0.78 | 1.11 |
| 0.62 | 0.83 | 0.75 | 0.68 | 1.29 |
| 0.86 | 1.22 | 0.68 | 0.77 | 0.98 |
| 0.72 | 0.84 | 0.65 | 0.69 | 1.17 |
| 0.73 | 0.73 | 0.66 | 0.86 | 0.96 |
| 0.66 | 0.91 | 0.76 | 0.73 | 1.38 |
| 0.76 | 0.91 | 0.82 | 0.79 | 1.18 |
| 0.83 | 0.95 | 0.91 | 0.92 | 1.14 |
| 0.66 | 0.79 | 0.60 | 0.60 | 0.97 |
| 0.56 | 0.66 | 0.63 | 0.54 | 1.53 |
| 0.58 | 1.18 | 0.81 | 0.71 | 1.54 |
| 0.97 | 0.78 | 0.67 | 0.76 | 1.07 |
| 0.78 | 0.84 | 0.70 | 0.68 | 1.10 |
| 0.73 | 0.89 | 0.79 | 0.78 | 1.33 |
| 0.47 | 0.68 | 0.62 | 0.57 | 1.48 |
| 0.88 | 1.15 | 0.93 | 0.94 | 1.47 |
| 0.85 | 1.01 | 0.81 | 0.74 | 1.13 |
| 0.54 | 0.78 | 0.72 | 0.59 | 1.07 |
| 0.49 | 0.56 | 0.65 | 0.64 | 1.74 |
| 1.04 | 0.83 | 0.54 | 0.72 | 0.75 |
| 0.71 | 0.85 | 0.68 | 0.68 | 1.06 |
| 0.85 | 0.94 | 0.79 | 0.65 | 0.96 |
| 0.67 | 0.56 | 0.69 | 0.53 | 1.15 |
| 0.78 | 0.91 | 0.76 | 0.74 | 1.08 |
| 0.94 | 0.91 | 0.83 | 1.60 | 0.89 |
| 0.63 | 0.76 | 0.70 | 0.58 | 1.19 |
| 0.65 | 0.79 | 0.69 | 0.67 | 1.19 |
| 0.56 | 0.78 | 0.66 | 0.62 | 1.20 |

|      |      |      |      |      |
|------|------|------|------|------|
| 0.72 | 0.86 | 0.69 | 0.64 | 1.17 |
| 0.62 | 0.80 | 0.82 | 0.86 | 1.30 |
| 0.70 | 0.72 | 0.68 | 0.66 | 1.07 |
| 0.78 | 0.83 | 0.70 | 0.67 | 1.08 |
| 0.98 | 1.20 | 0.95 | 1.27 | 1.37 |
| 0.85 | 0.97 | 0.74 | 0.74 | 1.06 |
| 0.69 | 0.92 | 0.68 | 0.69 | 1.24 |
| 0.70 | 0.87 | 0.70 | 0.68 | 1.15 |
| 0.69 | 0.61 | 0.63 | 0.62 | 1.22 |
| 0.80 | 0.76 | 0.73 | 0.72 | 1.06 |
| 0.77 | 0.83 | 0.72 | 0.71 | 1.17 |
| 0.67 | 0.76 | 0.65 | 0.60 | 1.12 |
| 0.63 | 0.87 | 0.76 | 0.71 | 1.28 |
| 0.67 | 0.76 | 0.70 | 2.38 | 1.17 |
| 0.76 | 0.54 | 0.70 | 0.50 | 1.04 |
| 0.48 | 0.79 | 0.53 | 0.65 | 1.38 |
| 0.60 | 0.60 | 0.74 | 0.53 | 1.40 |
| 0.62 | 0.70 | 0.98 | 0.56 | 1.26 |
| 0.68 | 0.87 | 0.61 | 0.64 | 1.20 |
| 0.89 | 1.48 | 0.98 | 1.09 | 1.21 |
| 0.58 | 0.72 | 0.60 | 0.57 | 1.22 |
| 0.58 | 0.75 | 0.62 | 0.58 | 1.16 |
| 1.71 | 2.27 | 1.94 | 1.65 | 1.17 |
| 0.34 | 0.97 | 0.51 | 0.66 | 1.50 |
| 0.78 | 0.88 | 1.03 | 0.63 | 0.87 |
| 0.71 | 0.84 | 0.73 | 0.75 | 1.45 |
| 0.67 | 1.06 | 0.80 | 0.71 | 1.27 |
| 0.80 | 0.78 | 0.67 | 0.84 | 1.20 |
| 0.89 | 1.16 | 1.05 | 0.92 | 1.14 |
| 1.31 | 1.45 | 1.23 | 1.07 | 1.07 |
| 0.54 | 0.82 | 0.73 | 0.56 | 1.40 |
| 1.00 | 1.00 | 0.85 | 0.63 | 1.01 |
| 0.69 | 0.84 | 0.70 | 0.63 | 1.15 |
| 0.84 | 0.89 | 0.76 | 0.81 | 1.00 |
| 0.88 | 0.91 | 0.77 | 0.72 | 1.04 |
| 0.54 | 0.73 | 0.60 | 0.57 | 1.28 |
| 0.65 | 0.38 | 0.56 | 0.50 | 0.90 |
| 0.62 | 0.81 | 0.63 | 0.54 | 1.30 |
| 0.61 | 0.81 | 0.65 | 0.66 | 1.16 |

|      |      |      |      |      |
|------|------|------|------|------|
| 0.73 | 0.95 | 0.75 | 0.79 | 1.20 |
| 0.74 | 0.61 | 0.72 | 0.59 | 1.14 |
| 0.60 | 0.69 | 0.65 | 0.56 | 1.26 |
| 0.73 | 0.86 | 0.76 | 0.77 | 1.21 |
| 0.71 | 1.04 | 0.83 | 0.70 | 1.37 |
| 1.11 | 0.93 | 0.97 | 0.91 | 0.93 |
| 0.73 | 0.97 | 0.71 | 0.92 | 1.26 |
| 0.85 | 0.95 | 0.76 | 0.71 | 1.07 |
| 0.97 | 1.04 | 0.65 | 0.60 | 0.78 |
| 0.80 | 1.08 | 0.86 | 1.01 | 1.17 |
| 0.75 | 0.78 | 0.67 | 0.60 | 1.08 |
| 0.70 | 1.00 | 0.76 | 0.63 | 1.14 |
| 0.79 | 0.63 | 0.75 | 0.69 | 1.17 |
| 0.74 | 0.97 | 0.95 | 0.81 | 1.27 |
| 0.91 | 2.74 | 0.84 | 1.01 | 1.18 |
| 0.63 | 0.75 | 0.67 | 0.68 | 1.30 |
| 0.93 | 1.01 | 0.82 | 0.71 | 1.04 |
| 0.76 | 1.02 | 0.80 | 0.74 | 1.20 |
| 0.91 | 1.02 | 0.81 | 1.04 | 1.19 |
| 0.55 | 0.73 | 0.61 | 0.57 | 1.27 |
| 0.79 | 0.95 | 0.85 | 0.69 | 1.13 |
| 5.19 | 6.19 | 5.22 | 4.36 | 1.17 |
| 0.67 | 0.76 | 0.67 | 0.64 | 1.11 |
| 0.89 | 0.98 | 0.80 | 1.46 | 1.07 |
| 0.72 | 0.89 | 0.67 | 0.68 | 1.08 |
| 0.80 | 0.96 | 0.77 | 0.66 | 1.14 |
| 0.65 | 0.91 | 0.66 | 0.59 | 1.24 |
| 0.55 | 0.83 | 0.60 | 0.56 | 1.23 |
| 0.42 | 0.68 | 0.46 | 0.63 | 1.24 |
| 0.68 | 0.86 | 0.63 | 0.69 | 1.33 |
| 0.55 | 0.76 | 0.56 | 0.51 | 1.22 |
| 0.88 | 0.98 | 0.80 | 0.86 | 1.03 |
| 0.62 | 0.82 | 0.71 | 0.63 | 1.24 |
| 0.59 | 0.79 | 0.69 | 0.57 | 1.23 |
| 0.75 | 0.73 | 0.68 | 0.66 | 1.10 |
| 0.55 | 0.71 | 0.59 | 0.52 | 1.24 |
| 0.80 | 0.99 | 0.78 | 0.79 | 1.10 |
| 0.77 | 0.73 | 0.77 | 0.77 | 1.10 |
| 1.11 | 1.36 | 1.07 | 0.99 | 1.15 |

|      |      |      |      |      |
|------|------|------|------|------|
| 0.78 | 0.89 | 0.78 | 0.76 | 1.18 |
| 0.87 | 0.89 | 0.80 | 0.72 | 1.04 |
| 0.59 | 1.21 | 0.68 | 0.67 | 1.28 |
| 0.55 | 0.60 | 0.69 | 0.66 | 1.24 |
| 0.59 | 0.84 | 0.85 | 0.94 | 1.36 |
| 0.71 | 0.76 | 0.75 | 0.71 | 1.18 |
| 0.77 | 0.86 | 0.89 | 0.66 | 1.09 |
| 0.74 | 0.82 | 0.70 | 0.54 | 1.10 |
| 0.69 | 0.70 | 0.73 | 0.70 | 1.23 |
| 0.68 | 0.83 | 0.71 | 0.66 | 1.22 |
| 0.73 | 0.58 | 0.63 | 0.57 | 1.24 |
| 0.91 | 1.06 | 0.90 | 1.44 | 1.27 |
| 0.75 | 0.94 | 0.73 | 0.64 | 1.09 |
| 0.77 | 0.88 | 0.74 | 1.18 | 1.09 |
| 0.92 | 1.00 | 0.91 | 0.87 | 1.02 |
| 0.93 | 0.92 | 0.86 | 0.85 | 1.06 |
| 0.90 | 1.02 | 0.91 | 0.98 | 1.08 |
| 0.64 | 1.03 | 0.74 | 0.66 | 1.54 |
| 0.64 | 0.84 | 0.70 | 0.67 | 1.26 |
| 0.55 | 0.81 | 0.62 | 0.60 | 1.14 |
| 0.73 | 0.83 | 0.78 | 0.68 | 1.04 |
| 1.74 | 2.06 | 1.10 | 0.90 | 1.07 |
| 0.83 | 0.83 | 0.60 | 0.83 | 0.90 |
| 0.63 | 0.96 | 0.79 | 0.86 | 0.91 |
| 0.58 | 0.84 | 0.51 | 0.64 | 1.00 |
| 1.00 | 0.77 | 0.72 | 0.67 | 1.06 |
| 0.92 | 0.95 | 0.81 | 0.78 | 1.01 |
| 0.87 | 1.08 | 0.87 | 0.78 | 1.22 |
| 0.68 | 1.53 | 1.02 | 0.91 | 1.49 |
| 0.78 | 0.61 | 0.71 | 0.69 | 1.08 |
| 0.50 | 0.72 | 0.61 | 0.47 | 1.35 |
| 0.53 | 0.80 | 0.76 | 0.68 | 1.42 |
| 0.79 | 0.96 | 0.76 | 0.76 | 1.04 |
| 0.56 | 0.97 | 0.68 | 0.60 | 1.26 |
| 0.67 | 0.84 | 0.71 | 0.64 | 1.21 |
| 0.61 | 0.77 | 0.57 | 0.58 | 1.24 |
| 0.71 | 0.80 | 0.72 | 0.70 | 1.10 |
| 0.56 | 0.61 | 0.65 | 0.51 | 1.14 |
| 0.57 | 0.88 | 0.63 | 0.64 | 1.19 |

|      |      |      |      |      |
|------|------|------|------|------|
| 0.66 | 0.84 | 0.70 | 0.67 | 1.21 |
| 0.75 | 1.23 | 0.67 | 0.83 | 1.38 |
| 0.67 | 0.79 | 0.70 | 0.67 | 1.16 |
| 0.67 | 0.91 | 0.75 | 0.75 | 1.32 |
| 0.61 | 0.68 | 0.64 | 0.51 | 1.15 |
| 0.54 | 0.72 | 0.61 | 0.57 | 1.33 |
| 0.68 | 0.77 | 0.66 | 0.59 | 1.04 |
| 0.52 | 0.80 | 0.60 | 0.61 | 1.39 |
| 0.65 | 0.79 | 0.66 | 0.62 | 1.13 |
| 0.64 | 0.94 | 0.67 | 0.61 | 1.09 |
| 0.56 | 0.76 | 0.68 | 0.79 | 1.36 |
| 0.65 | 0.96 | 0.65 | 0.67 | 1.19 |
| 0.51 | 0.74 | 0.57 | 0.66 | 1.44 |
| 0.80 | 1.14 | 0.79 | 1.26 | 1.27 |
| 0.69 | 0.64 | 0.50 | 0.54 | 1.07 |
| 0.47 | 0.50 | 0.43 | 0.44 | 1.02 |
| 0.70 | 0.74 | 0.69 | 0.74 | 1.09 |
| 0.75 | 0.98 | 0.72 | 0.96 | 1.26 |
| 0.57 | 0.78 | 0.68 | 0.56 | 1.28 |
| 0.77 | 0.84 | 0.84 | 0.81 | 1.13 |
| 0.68 | 0.75 | 0.67 | 0.64 | 1.16 |
| 1.07 | 0.87 | 0.80 | 0.93 | 0.78 |
| 0.72 | 0.86 | 0.72 | 0.69 | 1.19 |
| 0.61 | 0.98 | 0.59 | 0.72 | 1.43 |
| 0.64 | 0.75 | 0.67 | 0.61 | 1.21 |
| 0.56 | 0.75 | 0.67 | 0.60 | 1.31 |
| 0.71 | 0.80 | 0.53 | 0.56 | 0.91 |
| 0.54 | 0.60 | 0.63 | 0.32 | 0.76 |
| 0.94 | 1.40 | 1.03 | 0.95 | 1.37 |
| 0.70 | 0.79 | 0.76 | 0.71 | 1.19 |
| 0.71 | 0.86 | 0.72 | 0.72 | 1.16 |
| 0.59 | 0.85 | 0.66 | 0.64 | 1.22 |
| 0.54 | 0.73 | 0.64 | 0.47 | 1.34 |
| 0.68 | 0.93 | 0.73 | 0.71 | 1.20 |
| 0.60 | 0.70 | 0.68 | 0.70 | 1.14 |
| 0.84 | 0.60 | 0.70 | 0.57 | 0.99 |
| 0.81 | 1.24 | 0.84 | 1.29 | 1.41 |
| 0.88 | 0.83 | 0.84 | 0.86 | 1.07 |
| 0.68 | 0.80 | 0.72 | 0.67 | 1.20 |



|      |      |      |      |      |
|------|------|------|------|------|
| 0.61 | 0.67 | 0.63 | 0.60 | 1.13 |
| 0.55 | 0.70 | 0.65 | 0.63 | 1.24 |
| 0.60 | 0.84 | 0.69 | 0.72 | 1.40 |
| 0.51 | 0.82 | 0.68 | 0.64 | 1.21 |
| 0.70 | 0.79 | 0.66 | 0.63 | 1.05 |
| 0.78 | 0.50 | 0.74 | 0.54 | 0.71 |
| 0.29 | 1.47 | 0.66 | 0.81 | 1.86 |
| 0.58 | 0.64 | 0.65 | 0.48 | 1.21 |
| 0.61 | 0.45 | 0.62 | 0.61 | 1.05 |
| 0.84 | 0.95 | 0.71 | 0.68 | 1.02 |
| 0.66 | 0.74 | 0.69 | 0.63 | 1.17 |
| 0.53 | 0.71 | 0.61 | 0.59 | 1.35 |
| 0.77 | 0.81 | 0.76 | 0.74 | 1.15 |
| 0.65 | 0.90 | 0.72 | 0.66 | 1.31 |
| 1.02 | 0.88 | 0.77 | 0.78 | 1.06 |
| 0.52 | 0.70 | 0.57 | 0.47 | 1.34 |
| 0.73 | 1.06 | 0.61 | 0.61 | 1.07 |
| 3.31 | 3.91 | 3.39 | 2.93 | 1.22 |
| 0.54 | 0.64 | 0.70 | 0.52 | 1.17 |
| 0.66 | 0.84 | 0.63 | 0.61 | 1.17 |
| 0.61 | 0.85 | 0.55 | 0.54 | 1.19 |
| 0.64 | 0.84 | 0.65 | 0.59 | 1.27 |
| 0.89 | 1.00 | 0.84 | 0.87 | 1.04 |
| 0.80 | 0.80 | 0.63 | 0.67 | 1.30 |
| 0.56 | 0.78 | 0.63 | 0.64 | 1.40 |
| 0.81 | 0.94 | 0.82 | 0.82 | 1.26 |
| 0.61 | 0.79 | 0.71 | 0.65 | 1.27 |
| 0.59 | 0.90 | 0.71 | 0.69 | 1.40 |
| 0.81 | 0.69 | 0.86 | 0.84 | 1.12 |
| 0.56 | 0.81 | 0.83 | 0.68 | 1.27 |
| 0.68 | 0.76 | 0.81 | 0.58 | 1.18 |
| 0.60 | 0.68 | 0.64 | 0.63 | 1.15 |
| 0.78 | 0.93 | 0.74 | 0.76 | 1.08 |
| 0.69 | 0.71 | 0.64 | 0.60 | 1.13 |
| 0.62 | 0.78 | 0.70 | 0.69 | 1.17 |
| 0.50 | 0.94 | 0.48 | 0.62 | 1.43 |
| 0.71 | 0.91 | 1.05 | 0.71 | 1.46 |
| 0.62 | 0.74 | 0.73 | 0.67 | 1.39 |
| 0.68 | 0.95 | 0.72 | 0.66 | 1.13 |

|      |      |      |      |      |
|------|------|------|------|------|
| 0.61 | 1.28 | 0.91 | 0.85 | 2.29 |
| 0.78 | 0.90 | 0.81 | 0.71 | 1.24 |
| 0.63 | 0.73 | 0.60 | 0.73 | 1.28 |
| 1.02 | 0.82 | 0.72 | 0.81 | 1.27 |
| 0.77 | 0.77 | 0.82 | 0.77 | 1.11 |
| 0.71 | 0.74 | 0.74 | 0.71 | 1.09 |
| 0.80 | 0.94 | 0.66 | 0.67 | 1.18 |
| 1.56 | 0.95 | 1.65 | 0.89 | 0.60 |
| 0.66 | 1.08 | 0.65 | 0.70 | 1.61 |
| 0.61 | 0.81 | 0.62 | 0.63 | 1.23 |
| 0.51 | 0.85 | 0.78 | 0.63 | 1.40 |
| 0.87 | 0.72 | 0.67 | 0.70 | 1.09 |
| 0.52 | 0.73 | 0.60 | 0.72 | 1.36 |
| 0.68 | 0.83 | 0.79 | 0.72 | 1.13 |
| 0.65 | 0.76 | 0.74 | 0.75 | 1.22 |
| 0.75 | 0.90 | 1.03 | 0.83 | 1.29 |
| 0.69 | 0.79 | 0.67 | 0.70 | 1.11 |
| 0.56 | 0.70 | 0.76 | 0.60 | 1.27 |
| 0.74 | 0.93 | 0.72 | 0.82 | 1.15 |
| 0.60 | 0.76 | 0.64 | 0.62 | 1.15 |
| 0.72 | 1.00 | 0.90 | 0.81 | 1.42 |
| 0.62 | 0.71 | 0.63 | 0.56 | 1.36 |
| 0.72 | 0.95 | 0.61 | 0.69 | 1.14 |
| 0.51 | 0.71 | 0.60 | 0.59 | 1.36 |
| 0.54 | 0.74 | 0.68 | 0.63 | 1.29 |
| 0.76 | 0.57 | 0.64 | 0.60 | 1.19 |
| 0.62 | 0.85 | 0.73 | 0.60 | 1.30 |
| 0.57 | 1.53 | 0.72 | 0.82 | 1.54 |
| 0.61 | 0.73 | 0.67 | 0.68 | 1.42 |
| 0.77 | 0.89 | 0.73 | 0.65 | 1.09 |
| 1.30 | 1.04 | 0.64 | 0.31 | 1.24 |
| 0.84 | 1.29 | 0.74 | 0.81 | 1.09 |
| 0.76 | 0.83 | 0.69 | 0.65 | 1.07 |
| 0.61 | 0.62 | 0.59 | 0.46 | 1.06 |
| 0.64 | 0.69 | 0.59 | 0.75 | 1.09 |
| 0.63 | 0.84 | 0.58 | 0.57 | 1.20 |
| 0.81 | 0.76 | 0.73 | 0.61 | 1.00 |
| 0.77 | 0.88 | 0.73 | 0.69 | 1.02 |
| 0.88 | 0.93 | 0.79 | 0.85 | 1.06 |

|      |      |      |      |      |
|------|------|------|------|------|
| 0.75 | 0.63 | 0.77 | 0.71 | 1.18 |
| 0.68 | 0.81 | 0.59 | 0.63 | 1.05 |
| 0.57 | 0.73 | 0.53 | 0.65 | 1.28 |
| 0.72 | 0.89 | 0.69 | 0.70 | 1.12 |
| 0.79 | 0.85 | 0.70 | 0.70 | 0.99 |
| 0.71 | 0.79 | 0.66 | 0.67 | 1.07 |
| 0.85 | 0.95 | 0.89 | 0.76 | 0.97 |
| 0.71 | 0.79 | 0.71 | 0.74 | 1.02 |
| 0.77 | 0.82 | 0.72 | 0.68 | 0.99 |
| 0.71 | 0.83 | 0.69 | 0.68 | 1.11 |
| 0.64 | 0.73 | 0.58 | 0.64 | 1.07 |
| 0.87 | 0.94 | 0.69 | 0.62 | 1.01 |
| 0.50 | 0.80 | 0.52 | 0.58 | 1.09 |
| 0.69 | 0.86 | 0.72 | 0.71 | 1.26 |
| 0.52 | 0.72 | 0.64 | 0.56 | 1.36 |
| 0.57 | 1.00 | 0.67 | 0.65 | 1.41 |
| 0.77 | 0.90 | 0.69 | 0.68 | 1.14 |
| 0.86 | 0.85 | 0.79 | 0.71 | 0.94 |
| 0.85 | 0.94 | 0.81 | 0.83 | 1.18 |
| 0.94 | 0.85 | 0.80 | 0.86 | 1.21 |
| 0.99 | 1.17 | 0.75 | 0.60 | 0.95 |
| 0.56 | 0.74 | 0.65 | 0.64 | 1.30 |
| 0.67 | 1.02 | 0.66 | 0.61 | 1.42 |
| 0.72 | 0.80 | 0.67 | 0.73 | 1.07 |
| 0.82 | 0.90 | 0.70 | 0.71 | 0.99 |
| 0.93 | 0.86 | 1.00 | 0.83 | 1.01 |
| 0.86 | 0.85 | 0.75 | 0.74 | 0.95 |
| 0.79 | 0.80 | 0.91 | 0.81 | 1.04 |
| 0.85 | 0.95 | 0.72 | 0.71 | 1.07 |
| 0.86 | 1.17 | 0.72 | 0.86 | 1.34 |
| 0.84 | 0.90 | 0.69 | 0.87 | 1.09 |
| 0.61 | 0.85 | 0.65 | 0.74 | 1.33 |
| 0.76 | 0.84 | 0.57 | 0.79 | 1.00 |
| 1.07 | 1.33 | 1.05 | 1.12 | 1.03 |
| 0.92 | 0.94 | 0.89 | 0.79 | 0.89 |
| 0.61 | 0.67 | 0.62 | 0.62 | 1.20 |
| 0.60 | 0.56 | 0.68 | 0.68 | 1.07 |
| 0.67 | 0.66 | 0.54 | 0.28 | 1.01 |
| 0.58 | 0.82 | 0.71 | 0.53 | 1.40 |

|      |      |      |      |       |
|------|------|------|------|-------|
| 0.61 | 0.84 | 0.69 | 0.67 | 1.24  |
| 0.59 | 0.82 | 0.65 | 0.68 | 1.53  |
| 0.68 | 0.84 | 0.73 | 0.73 | 1.12  |
| 0.85 | 0.97 | 0.84 | 0.73 | 1.05  |
| 0.76 | 0.99 | 0.75 | 0.85 | 1.25  |
| 0.54 | 0.90 | 0.65 | 0.60 | 1.35  |
| 0.71 | 0.85 | 0.74 | 0.58 | 1.23  |
| 0.66 | 0.77 | 0.65 | 0.66 | 1.16  |
| 0.60 | 1.00 | 0.65 | 0.48 | 1.37  |
| 0.57 | 0.86 | 0.69 | 0.77 | 1.55  |
| 0.64 | 0.62 | 0.62 | 0.34 | 0.72  |
| 0.57 | 0.73 | 0.64 | 0.59 | 1.29  |
| 0.65 | 0.76 | 0.62 | 0.63 | 1.09  |
| 1.02 | 1.23 | 0.99 | 1.10 | 1.17  |
| 0.79 | 0.90 | 0.75 | 0.55 | 1.08  |
| 0.73 | 0.89 | 0.65 | 0.57 | 1.09  |
| 0.78 | 0.76 | 0.79 | 0.77 | 1.09  |
| 0.57 | 0.75 | 0.65 | 0.61 | 1.26  |
| 0.68 | 0.91 | 0.70 | 0.67 | 1.36  |
| 0.81 | 1.02 | 0.76 | 0.79 | 1.14  |
| 0.70 | 0.65 | 0.56 | 0.67 | 1.27  |
| 0.77 | 1.12 | 0.96 | 0.95 | 14.69 |
| 0.68 | 0.81 | 0.69 | 0.62 | 1.15  |
| 0.76 | 0.90 | 0.74 | 0.68 | 1.18  |
| 0.91 | 0.89 | 0.77 | 0.62 | 1.03  |
| 0.93 | 0.64 | 0.91 | 0.74 | 0.92  |
| 0.78 | 1.03 | 0.66 | 0.71 | 1.25  |
| 0.99 | 1.17 | 0.85 | 0.79 | 1.11  |
| 0.80 | 0.96 | 0.62 | 0.64 | 0.97  |
| 0.72 | 0.87 | 0.79 | 0.68 | 1.11  |
| 0.70 | 0.79 | 0.77 | 0.58 | 1.44  |
| 0.78 | 0.79 | 0.66 | 0.75 | 1.09  |
| 0.60 | 0.83 | 0.59 | 0.49 | 1.20  |
| 0.82 | 0.89 | 0.80 | 0.79 | 1.19  |
| 0.48 | 0.86 | 0.67 | 0.76 | 1.56  |
| 0.81 | 0.90 | 0.84 | 0.80 | 1.17  |
| 0.49 | 0.65 | 0.56 | 0.50 | 1.21  |
| 0.65 | 0.73 | 0.60 | 0.50 | 1.02  |
| 0.57 | 0.68 | 0.66 | 0.60 | 1.25  |

|      |      |      |      |      |
|------|------|------|------|------|
| 0.80 | 0.60 | 0.62 | 0.62 | 1.25 |
| 0.50 | 0.58 | 0.47 | 0.49 | 1.12 |
| 0.68 | 0.89 | 0.69 | 0.64 | 1.19 |
| 0.80 | 0.92 | 0.67 | 0.64 | 1.11 |
| 0.73 | 0.87 | 0.81 | 0.67 | 1.11 |
| 0.57 | 0.98 | 0.96 | 0.75 | 1.23 |
| 0.68 | 0.66 | 0.60 | 0.61 | 1.06 |
| 0.65 | 0.64 | 0.59 | 0.52 | 0.95 |
| 0.84 | 0.88 | 0.71 | 0.64 | 1.08 |
| 0.66 | 0.84 | 0.73 | 0.66 | 1.09 |
| 0.51 | 0.85 | 0.64 | 0.59 | 1.40 |
| 0.88 | 0.69 | 0.79 | 0.66 | 1.01 |
| 0.75 | 0.83 | 0.75 | 0.70 | 1.15 |
| 0.51 | 0.69 | 0.64 | 0.55 | 1.51 |
| 1.41 | 1.38 | 0.81 | 0.60 | 0.73 |
| 0.55 | 0.57 | 0.59 | 0.52 | 1.46 |
| 0.74 | 0.89 | 0.69 | 0.69 | 1.13 |
| 0.91 | 0.90 | 0.86 | 0.99 | 1.13 |
| 0.54 | 0.60 | 0.65 | 0.57 | 1.21 |
| 0.69 | 0.98 | 0.81 | 0.93 | 1.19 |
| 0.81 | 0.76 | 0.83 | 0.87 | 1.26 |
| 0.68 | 0.67 | 0.83 | 0.64 | 1.25 |
| 0.67 | 1.31 | 0.72 | 0.73 | 1.35 |
| 1.24 | 1.55 | 1.57 | 1.13 | 1.35 |
| 0.98 | 1.30 | 0.98 | 0.92 | 1.20 |
| 0.85 | 0.91 | 0.79 | 0.82 | 1.10 |
| 0.78 | 0.62 | 0.60 | 0.65 | 1.14 |
| 0.41 | 0.91 | 0.53 | 0.41 | 1.44 |
| 0.52 | 0.52 | 0.54 | 0.41 | 1.00 |
| 0.56 | 0.82 | 0.60 | 0.53 | 1.44 |
| 0.72 | 0.89 | 0.75 | 0.84 | 1.20 |
| 1.11 | 1.97 | 0.93 | 1.64 | 1.04 |
| 0.82 | 1.09 | 0.96 | 0.92 | 1.14 |
| 1.02 | 1.32 | 0.90 | 0.83 | 0.99 |
| 0.75 | 0.59 | 0.70 | 0.59 | 1.20 |
| 0.84 | 0.95 | 0.79 | 0.84 | 1.15 |
| 0.68 | 0.84 | 0.78 | 0.65 | 1.14 |
| 0.81 | 0.92 | 0.74 | 0.68 | 1.28 |
| 0.54 | 1.02 | 0.78 | 0.72 | 1.37 |

|      |      |      |      |      |
|------|------|------|------|------|
| 0.46 | 0.76 | 0.65 | 0.49 | 1.35 |
| 0.59 | 0.83 | 0.61 | 0.64 | 1.18 |
| 0.44 | 0.56 | 0.67 | 0.64 | 1.31 |
| 0.68 | 0.80 | 0.66 | 0.61 | 1.12 |
| 0.75 | 0.78 | 0.68 | 0.62 | 1.19 |
| 0.89 | 0.62 | 0.78 | 0.63 | 1.02 |
| 0.72 | 0.87 | 0.72 | 0.70 | 1.14 |
| 0.78 | 1.00 | 0.82 | 0.75 | 1.26 |
| 0.50 | 0.82 | 0.66 | 0.58 | 1.37 |
| 1.03 | 0.89 | 1.24 | 0.71 | 1.08 |
| 1.00 | 1.18 | 0.89 | 0.84 | 1.13 |
| 0.65 | 0.83 | 0.70 | 0.62 | 1.21 |
| 0.81 | 1.04 | 0.77 | 0.75 | 1.27 |
| 0.99 | 1.54 | 0.96 | 1.03 | 0.94 |
| 1.07 | 1.22 | 1.00 | 1.18 | 1.32 |
| 0.73 | 0.78 | 0.73 | 0.64 | 1.12 |
| 0.61 | 0.53 | 0.68 | 0.66 | 1.29 |
| 0.62 | 0.74 | 0.79 | 0.63 | 0.92 |
| 0.51 | 0.67 | 0.60 | 0.61 | 1.53 |
| 0.57 | 0.68 | 0.68 | 0.57 | 1.28 |
| 0.78 | 0.88 | 0.70 | 0.64 | 1.09 |
| 0.85 | 0.65 | 0.66 | 0.64 | 1.09 |
| 0.62 | 0.75 | 0.66 | 0.67 | 1.20 |
| 0.63 | 0.83 | 0.72 | 0.59 | 1.21 |
| 0.60 | 0.75 | 0.61 | 0.93 | 2.34 |
| 0.54 | 1.08 | 0.77 | 0.59 | 1.28 |
| 0.54 | 0.64 | 0.69 | 0.50 | 1.11 |
| 0.43 | 0.61 | 0.51 | 0.44 | 1.40 |
| 0.70 | 0.94 | 0.78 | 0.88 | 1.28 |
| 0.65 | 0.82 | 0.65 | 0.64 | 1.13 |
| 0.78 | 0.81 | 0.72 | 0.77 | 1.05 |
| 0.58 | 0.73 | 0.64 | 0.58 | 1.26 |
| 0.86 | 0.87 | 0.94 | 0.75 | 1.05 |
| 0.61 | 0.74 | 0.61 | 0.57 | 1.35 |
| 0.65 | 0.92 | 0.81 | 0.73 | 1.08 |
| 0.61 | 0.95 | 0.61 | 0.69 | 1.36 |
| 0.83 | 0.95 | 0.87 | 0.80 | 1.10 |
| 0.77 | 0.87 | 0.74 | 0.73 | 1.08 |
| 0.75 | 0.99 | 0.68 | 0.80 | 1.19 |

|      |      |      |      |      |
|------|------|------|------|------|
| 0.60 | 0.52 | 0.59 | 0.54 | 1.04 |
| 0.65 | 0.68 | 0.82 | 0.62 | 1.31 |
| 0.60 | 0.66 | 0.65 | 0.58 | 1.05 |
| 0.50 | 0.75 | 0.60 | 0.68 | 1.53 |
| 0.59 | 0.75 | 0.64 | 0.62 | 1.34 |
| 0.85 | 0.98 | 0.81 | 0.72 | 1.15 |
| 0.80 | 0.98 | 0.76 | 0.75 | 1.07 |
| 0.66 | 0.72 | 0.68 | 0.68 | 1.14 |
| 0.59 | 0.77 | 0.70 | 0.56 | 1.17 |
| 0.57 | 0.86 | 0.82 | 0.67 | 1.25 |
| 0.58 | 0.78 | 0.75 | 0.67 | 1.15 |
| 0.71 | 0.84 | 0.67 | 0.64 | 1.14 |
| 0.64 | 0.70 | 0.78 | 0.65 | 1.08 |
| 0.64 | 0.92 | 0.76 | 0.71 | 1.33 |
| 0.71 | 0.89 | 0.76 | 0.72 | 1.27 |
| 0.99 | 1.07 | 0.95 | 1.08 | 1.08 |
| 0.74 | 0.64 | 0.70 | 0.59 | 0.95 |
| 0.64 | 0.81 | 0.75 | 0.73 | 1.35 |
| 0.84 | 0.99 | 0.74 | 0.73 | 1.05 |
| 0.71 | 0.61 | 0.62 | 0.99 | 0.81 |
| 0.76 | 0.69 | 0.75 | 0.65 | 0.92 |
| 0.60 | 0.76 | 0.71 | 0.65 | 1.36 |
| 0.83 | 0.96 | 0.78 | 0.81 | 1.10 |
| 0.96 | 1.14 | 0.83 | 0.92 | 1.05 |
| 0.93 | 0.64 | 0.66 | 0.62 | 1.06 |
| 1.23 | 0.90 | 0.90 | 0.92 | 1.09 |
| 0.98 | 0.81 | 0.71 | 0.83 | 1.18 |
| 0.91 | 1.21 | 0.94 | 0.91 | 1.01 |
| 0.67 | 0.72 | 0.63 | 0.60 | 1.03 |
| 0.94 | 0.72 | 0.62 | 0.63 | 1.05 |
| 0.76 | 0.58 | 0.81 | 0.70 | 1.12 |
| 0.62 | 0.82 | 0.72 | 0.72 | 1.50 |
| 1.65 | 0.80 | 0.56 | 0.52 | 0.39 |
| 0.82 | 0.90 | 0.77 | 0.86 | 1.12 |
| 0.90 | 0.96 | 0.84 | 1.64 | 1.07 |
| 0.76 | 0.61 | 0.74 | 0.71 | 1.17 |
| 0.66 | 0.78 | 0.65 | 0.67 | 1.28 |
| 0.51 | 0.72 | 0.52 | 0.54 | 1.17 |
| 0.76 | 0.86 | 0.78 | 0.75 | 1.06 |

|      |      |      |      |      |
|------|------|------|------|------|
| 0.67 | 0.86 | 0.74 | 0.70 | 1.19 |
| 0.55 | 0.67 | 0.62 | 0.58 | 1.19 |
| 0.63 | 0.87 | 0.72 | 0.67 | 1.29 |
| 0.36 | 0.59 | 0.56 | 0.51 | 1.40 |
| 0.87 | 0.94 | 0.81 | 0.72 | 1.05 |
| 1.08 | 0.90 | 0.71 | 0.82 | 1.03 |
| 0.71 | 1.70 | 0.71 | 0.81 | 1.31 |
| 0.75 | 0.95 | 0.77 | 0.73 | 1.19 |
| 0.54 | 0.76 | 0.60 | 0.47 | 1.35 |
| 0.59 | 0.76 | 0.69 | 0.70 | 1.39 |
| 0.78 | 0.75 | 0.70 | 0.69 | 1.08 |
| 0.81 | 1.01 | 0.79 | 0.71 | 1.16 |
| 0.57 | 0.95 | 0.57 | 0.48 | 1.42 |
| 0.60 | 0.59 | 0.55 | 0.56 | 1.27 |
| 0.64 | 0.89 | 0.68 | 0.61 | 1.18 |
| 0.62 | 0.78 | 0.68 | 0.74 | 1.33 |
| 0.74 | 0.73 | 0.68 | 0.69 | 0.95 |
| 0.53 | 0.63 | 0.62 | 0.54 | 1.22 |
| 0.73 | 0.89 | 0.72 | 0.72 | 1.24 |
| 0.64 | 0.77 | 0.57 | 0.68 | 1.26 |
| 0.74 | 0.81 | 0.72 | 0.68 | 1.19 |
| 0.84 | 0.68 | 0.62 | 0.61 | 1.14 |
| 0.74 | 0.77 | 0.81 | 0.79 | 0.95 |
| 0.72 | 0.74 | 0.68 | 0.73 | 1.09 |
| 0.76 | 0.67 | 0.65 | 0.57 | 0.93 |
| 0.87 | 0.93 | 0.71 | 0.77 | 1.01 |
| 0.62 | 0.70 | 0.55 | 0.53 | 1.09 |
| 0.65 | 0.74 | 0.70 | 0.66 | 1.24 |
| 0.83 | 0.98 | 0.98 | 0.89 | 1.41 |
| 0.76 | 1.04 | 0.76 | 0.50 | 0.83 |
| 0.60 | 0.60 | 0.61 | 0.49 | 1.11 |
| 0.59 | 0.62 | 0.64 | 0.56 | 1.21 |
| 1.02 | 1.16 | 0.79 | 1.04 | 0.97 |
| 0.91 | 1.16 | 0.67 | 0.82 | 1.07 |
| 0.80 | 1.10 | 0.79 | 0.99 | 1.24 |
| 0.74 | 0.93 | 0.79 | 0.70 | 1.20 |
| 0.75 | 0.89 | 0.70 | 0.62 | 1.18 |
| 0.65 | 0.76 | 0.69 | 0.63 | 1.09 |
| 1.02 | 1.04 | 0.81 | 0.82 | 0.97 |



|      |      |      |      |      |
|------|------|------|------|------|
| 0.94 | 0.70 | 0.84 | 0.80 | 0.99 |
| 0.60 | 0.75 | 0.71 | 0.65 | 1.41 |
| 0.49 | 0.59 | 0.57 | 0.45 | 1.16 |
| 0.68 | 0.82 | 0.76 | 0.90 | 1.25 |
| 0.62 | 0.96 | 0.65 | 0.59 | 1.24 |
| 0.77 | 1.00 | 0.75 | 0.78 | 1.03 |
| 0.71 | 0.64 | 0.69 | 0.63 | 1.02 |

**Park et al., Supplementary Table 6**

**Proteins identified with Compound 5-matrix in lysates from Mycobacterium Bovis BCG cell extracts. Generation of IC50 values for test compound Compound 6**

Abbreviations: SSM; number of spectrum-to-sequence matches, UPM; unique peptide matches, NA; not available

| Experiment ID | Protein Name | Mascot Score | SSM | UPM | SSM used for quantification | abundance relative to vehicle |         |         |         |         |         |
|---------------|--------------|--------------|-----|-----|-----------------------------|-------------------------------|---------|---------|---------|---------|---------|
|               |              |              |     |     |                             | TMT126                        | TMT127L | TMT127H | TMT128L | TMT128H | TMT129L |
| X020165       | BCG_3481C    | 1229         | 31  | 21  | 26                          | 0.28                          | 0.32    | 0.47    | 0.62    | 0.80    | 1.00    |
| X020165       | BCG_1908C    | 1061         | 28  | 13  | 15                          | 0.53                          | 0.74    | 0.81    | 0.81    | 0.86    | 1.00    |
| X020165       | BCG_0005     | 546          | 20  | 10  | 10                          | 0.89                          | 0.92    | 0.88    | 1.02    | 1.09    | 1.00    |
| X020165       | BCG_0006     | 1511         | 34  | 24  | 24                          | 0.90                          | 1.00    | 0.90    | 0.96    | 1.00    | 1.00    |
| X020165       | BCG_0007     | 334          | 8   | 6   | 6                           | 0.97                          | 1.11    | 1.12    | 1.06    | 1.03    | 1.00    |
| X020165       | BCG_0008C    | 155          | 3   | 2   | 2                           | 1.04                          | 0.91    | 0.95    | 1.17    | 1.04    | 1.00    |
| X020165       | BCG_0009     | 324          | 11  | 5   | 8                           | 1.11                          | 0.91    | 1.02    | 1.14    | 1.19    | 1.00    |
| X020165       | BCG_0023C    | 402          | 7   | 4   | 4                           | 0.99                          | 0.92    | 0.98    | 1.03    | 1.16    | 1.00    |
| X020165       | BCG_0027C    | 258          | 11  | 4   | 5                           | 0.91                          | 1.11    | 0.90    | 0.87    | 1.12    | 1.00    |
| X020165       | BCG_0029C    | 63           | 2   | 2   | 2                           | 0.61                          | 0.93    | 0.77    | 0.88    | 0.75    | 1.00    |
| X020165       | BCG_0031     | 118          | 5   | 2   | 2                           | 1.02                          | 0.87    | 0.91    | 0.94    | 0.99    | 1.00    |
| X020165       | BCG_0032     | 810          | 16  | 12  | 13                          | 0.94                          | 0.82    | 0.91    | 0.97    | 1.08    | 1.00    |
| X020165       | BCG_0044C    | 502          | 9   | 8   | 8                           | 0.85                          | 0.86    | 0.99    | 0.99    | 1.02    | 1.00    |
| X020165       | BCG_0045C    | 296          | 8   | 3   | 3                           | 0.94                          | 1.15    | 0.96    | 1.00    | 0.97    | 1.00    |
| X020165       | BCG_0046C    | 232          | 6   | 5   | 5                           | 1.03                          | 1.15    | 0.91    | 0.93    | 0.98    | 1.00    |
| X020165       | BCG_0048C    | 453          | 10  | 5   | 5                           | 0.90                          | 0.82    | 0.89    | 0.95    | 1.06    | 1.00    |
| X020165       | BCG_0049C    | 223          | 5   | 5   | 5                           | 1.06                          | 0.94    | 1.03    | 1.03    | 1.09    | 1.00    |
| X020165       | BCG_0050C    | 512          | 13  | 10  | 11                          | 1.25                          | 1.04    | 1.02    | 1.09    | 1.09    | 1.00    |
| X020165       | BCG_0072     | 488          | 12  | 8   | 8                           | 1.05                          | 0.94    | 0.84    | 0.93    | 1.12    | 1.00    |
| X020165       | BCG_0075C    | 312          | 8   | 7   | 7                           | 0.86                          | 0.92    | 0.96    | 0.96    | 0.97    | 1.00    |
| X020165       | BCG_0076C    | 93           | 2   | 2   | 2                           | 1.31                          | 1.12    | 1.06    | 0.98    | 0.98    | 1.00    |
| X020165       | BCG_0077C    | 701          | 16  | 10  | 10                          | 0.89                          | 0.67    | 0.87    | 0.93    | 1.10    | 1.00    |
| X020165       | BCG_0078C    | 276          | 6   | 3   | 3                           | 1.17                          | 1.48    | 1.31    | 1.22    | 1.27    | 1.00    |
| X020165       | BCG_0079C    | 329          | 8   | 4   | 4                           | 0.86                          | 0.90    | 0.93    | 0.94    | 1.03    | 1.00    |
| X020165       | BCG_0081     | 264          | 7   | 2   | 2                           | 1.12                          | 1.32    | 0.89    | 1.08    | 1.10    | 1.00    |
| X020165       | BCG_0082     | 141          | 4   | 2   | 2                           | 0.88                          | 0.99    | 1.11    | 1.00    | 1.01    | 1.00    |
| X020165       | BCG_0083     | 67           | 2   | 2   | 2                           | 1.02                          | 1.12    | 0.98    | 1.23    | 0.96    | 1.00    |
| X020165       | BCG_0084     | 340          | 9   | 6   | 7                           | 0.96                          | 0.88    | 1.12    | 1.01    | 1.03    | 1.00    |

|         |           |     |    |    |    |      |      |      |      |      |      |
|---------|-----------|-----|----|----|----|------|------|------|------|------|------|
| X020165 | BCG_0085  | 490 | 13 | 6  | 6  | 1.08 | 0.89 | 1.07 | 1.08 | 1.12 | 1.00 |
| X020165 | BCG_0086  | 256 | 13 | 7  | 10 | 0.95 | 0.90 | 1.05 | 0.90 | 1.09 | 1.00 |
| X020165 | BCG_0087  | 391 | 15 | 7  | 11 | 0.93 | 0.91 | 1.09 | 1.04 | 1.01 | 1.00 |
| X020165 | BCG_0091  | 72  | 3  | 2  | 2  | 0.95 | 0.83 | 1.00 | 1.14 | 1.14 | 1.00 |
| X020165 | BCG_0097C | 627 | 18 | 12 | 12 | 0.84 | 0.85 | 0.76 | 0.94 | 0.97 | 1.00 |
| X020165 | BCG_0110C | 167 | 4  | 2  | 2  | 1.21 | 0.94 | 0.94 | 1.08 | 1.15 | 1.00 |
| X020165 | BCG_0112  | 163 | 3  | 3  | 3  | 1.30 | 1.38 | 1.05 | 1.13 | 1.15 | 1.00 |
| X020165 | BCG_0121  | 436 | 15 | 9  | 12 | 0.98 | 0.83 | 0.86 | 0.85 | 0.98 | 1.00 |
| X020165 | BCG_0140C | 282 | 8  | 4  | 4  | 1.05 | 1.40 | 1.10 | 1.08 | 0.97 | 1.00 |
| X020165 | BCG_0155C | 85  | 3  | 2  | 2  | 1.09 | 1.40 | 1.18 | 1.18 | 1.12 | 1.00 |
| X020165 | BCG_0157  | 104 | 7  | 2  | 2  | 1.22 | 1.15 | 1.22 | 1.16 | 1.28 | 1.00 |
| X020165 | BCG_0160  | 430 | 10 | 6  | 6  | 1.11 | 0.94 | 1.05 | 1.04 | 1.11 | 1.00 |
| X020165 | BCG_0161  | 684 | 16 | 11 | 11 | 0.87 | 1.19 | 0.89 | 0.97 | 1.02 | 1.00 |
| X020165 | BCG_0165C | 303 | 7  | 5  | 5  | 0.95 | 1.13 | 1.05 | 1.01 | 1.04 | 1.00 |
| X020165 | BCG_0172  | 135 | 4  | 3  | 3  | 1.04 | 1.16 | 1.15 | 0.97 | 1.06 | 1.00 |
| X020165 | BCG_0173C | 122 | 3  | 3  | 3  | 1.16 | 1.12 | 1.17 | 1.13 | 1.16 | 1.00 |
| X020165 | BCG_0177C | 92  | 2  | 2  | 2  | 1.25 | 0.84 | 0.98 | 1.21 | 1.19 | 1.00 |
| X020165 | BCG_0180  | 288 | 5  | 4  | 4  | 0.90 | 0.94 | 0.85 | 0.97 | 1.00 | 1.00 |
| X020165 | BCG_0183  | 815 | 20 | 11 | 12 | 0.87 | 0.86 | 0.91 | 0.84 | 1.06 | 1.00 |
| X020165 | BCG_0184  | 945 | 17 | 11 | 14 | 0.96 | 0.72 | 0.88 | 0.92 | 1.13 | 1.00 |
| X020165 | BCG_0190C | 210 | 7  | 5  | 5  | 0.90 | 0.78 | 0.80 | 0.83 | 0.93 | 1.00 |
| X020165 | BCG_0191  | 659 | 14 | 9  | 9  | 0.89 | 0.97 | 0.89 | 0.97 | 0.99 | 1.00 |
| X020165 | BCG_0193  | 448 | 10 | 5  | 6  | 0.86 | 0.94 | 1.00 | 0.96 | 0.96 | 1.00 |
| X020165 | BCG_0197  | 294 | 6  | 3  | 3  | 1.13 | 1.14 | 1.05 | 1.17 | 1.09 | 1.00 |
| X020165 | BCG_0200  | 256 | 11 | 5  | 8  | 0.98 | 0.87 | 0.90 | 1.11 | 1.11 | 1.00 |
| X020165 | BCG_0206  | 140 | 5  | 3  | 3  | 1.80 | 0.83 | 1.16 | 1.33 | 0.93 | 1.00 |
| X020165 | BCG_0207  | 307 | 7  | 3  | 3  | 0.88 | 0.76 | 1.16 | 1.00 | 0.94 | 1.00 |
| X020165 | BCG_0208  | 175 | 5  | 2  | 2  | 0.92 | 0.98 | 1.42 | 1.04 | 0.93 | 1.00 |
| X020165 | BCG_0209  | 211 | 4  | 4  | 4  | 0.99 | 1.14 | 1.13 | 1.05 | 1.03 | 1.00 |
| X020165 | BCG_0210  | 517 | 12 | 4  | 4  | 0.94 | 0.96 | 1.07 | 0.98 | 0.94 | 1.00 |
| X020165 | BCG_0211  | 275 | 5  | 4  | 4  | 0.89 | 1.10 | 1.01 | 0.92 | 0.92 | 1.00 |
| X020165 | BCG_0212  | 142 | 2  | 2  | 2  | 0.85 | 0.71 | 0.82 | 0.90 | 1.04 | 1.00 |
| X020165 | BCG_0213  | 263 | 7  | 7  | 7  | 1.06 | 1.23 | 1.04 | 1.02 | 1.04 | 1.00 |
| X020165 | BCG_0214  | 132 | 5  | 3  | 3  | 0.97 | 1.04 | 1.06 | 1.06 | 1.08 | 1.00 |
| X020165 | BCG_0215  | 514 | 10 | 5  | 6  | 0.86 | 1.01 | 0.92 | 0.98 | 1.06 | 1.00 |
| X020165 | BCG_0217C | 270 | 8  | 5  | 5  | 1.03 | 1.37 | 1.04 | 1.01 | 1.00 | 1.00 |
| X020165 | BCG_0220  | 245 | 5  | 4  | 5  | 0.96 | 0.87 | 0.90 | 0.95 | 0.98 | 1.00 |
| X020165 | BCG_0224  | 222 | 6  | 3  | 3  | 1.03 | 0.81 | 0.97 | 0.94 | 1.00 | 1.00 |
| X020165 | BCG_0226C | 505 | 10 | 7  | 7  | 0.98 | 0.99 | 0.97 | 1.04 | 1.10 | 1.00 |
| X020165 | BCG_0227  | 282 | 7  | 4  | 4  | 1.06 | 1.00 | 0.91 | 0.93 | 1.13 | 1.00 |

|         |           |      |    |    |    |      |      |      |      |      |      |
|---------|-----------|------|----|----|----|------|------|------|------|------|------|
| X020165 | BCG_0235C | 514  | 10 | 8  | 8  | 1.00 | 0.99 | 1.01 | 1.00 | 1.11 | 1.00 |
| X020165 | BCG_0237  | 158  | 4  | 2  | 2  | 1.03 | 1.02 | 0.96 | 1.13 | 1.13 | 1.00 |
| X020165 | BCG_0243C | 949  | 25 | 14 | 14 | 0.88 | 0.99 | 0.95 | 0.94 | 0.96 | 1.00 |
| X020165 | BCG_0244C | 90   | 2  | 2  | 2  | 1.02 | 1.06 | 1.20 | 1.09 | 1.20 | 1.00 |
| X020165 | BCG_0248  | 529  | 15 | 7  | 7  | 1.09 | 0.97 | 1.02 | 0.94 | 1.11 | 1.00 |
| X020165 | BCG_0253  | 370  | 9  | 7  | 7  | 0.91 | 0.78 | 0.78 | 0.88 | 1.03 | 1.00 |
| X020165 | BCG_0254C | 145  | 3  | 2  | 2  | 1.03 | 0.88 | 0.97 | 1.15 | 1.04 | 1.00 |
| X020165 | BCG_0264C | 691  | 16 | 10 | 11 | 0.83 | 0.70 | 0.85 | 0.75 | 0.91 | 1.00 |
| X020165 | BCG_0268  | 289  | 10 | 4  | 5  | 0.97 | 1.13 | 0.93 | 0.97 | 1.09 | 1.00 |
| X020165 | BCG_0271C | 379  | 8  | 4  | 4  | 0.89 | 0.91 | 0.76 | 0.82 | 1.00 | 1.00 |
| X020165 | BCG_0275  | 198  | 8  | 4  | 4  | 1.13 | 1.28 | 1.11 | 1.14 | 1.04 | 1.00 |
| X020165 | BCG_0276  | 123  | 3  | 3  | 3  | 1.02 | 0.80 | 1.04 | 1.07 | 1.13 | 1.00 |
| X020165 | BCG_0279C | 95   | 4  | 2  | 2  | 0.90 | 1.62 | 0.97 | 0.90 | 1.07 | 1.00 |
| X020165 | BCG_0280C | 1233 | 27 | 18 | 20 | 0.92 | 0.96 | 0.96 | 1.01 | 1.07 | 1.00 |
| X020165 | BCG_0281  | 811  | 23 | 12 | 14 | 1.00 | 0.90 | 1.05 | 1.07 | 1.15 | 1.00 |
| X020165 | BCG_0282C | 622  | 17 | 8  | 8  | 0.87 | 0.95 | 0.91 | 0.95 | 1.12 | 1.00 |
| X020165 | BCG_0285C | 865  | 22 | 15 | 18 | 0.91 | 0.83 | 0.95 | 0.99 | 1.04 | 1.00 |
| X020165 | BCG_0286C | 1392 | 36 | 24 | 26 | 0.92 | 0.89 | 1.01 | 1.04 | 1.09 | 1.00 |
| X020165 | BCG_0287C | 280  | 6  | 5  | 5  | 0.80 | 0.84 | 0.89 | 0.97 | 1.02 | 1.00 |
| X020165 | BCG_0289C | 379  | 11 | 7  | 7  | 1.09 | 1.08 | 1.15 | 1.15 | 1.08 | 1.00 |
| X020165 | BCG_0298C | 388  | 10 | 5  | 5  | 1.19 | 1.18 | 1.31 | 1.04 | 0.99 | 1.00 |
| X020165 | BCG_0300C | 92   | 3  | 2  | 2  | 1.20 | 1.50 | 1.26 | 1.17 | 0.99 | 1.00 |
| X020165 | BCG_0308  | 730  | 18 | 13 | 14 | 0.80 | 0.69 | 0.84 | 0.87 | 1.05 | 1.00 |
| X020165 | BCG_0309C | 131  | 4  | 2  | 2  | 0.90 | 0.86 | 0.94 | 0.97 | 1.13 | 1.00 |
| X020165 | BCG_0310C | 84   | 3  | 2  | 2  | 1.03 | 1.04 | 0.99 | 1.03 | 0.95 | 1.00 |
| X020165 | BCG_0321  | 380  | 10 | 4  | 4  | 1.18 | 1.22 | 0.96 | 1.02 | 1.12 | 1.00 |
| X020165 | BCG_0324  | 411  | 11 | 7  | 7  | 0.99 | 1.02 | 1.04 | 1.03 | 0.95 | 1.00 |
| X020165 | BCG_0330  | 105  | 3  | 3  | 3  | 0.83 | 1.38 | 1.07 | 1.11 | 0.98 | 1.00 |
| X020165 | BCG_0336C | 183  | 3  | 3  | 3  | 1.04 | 0.98 | 0.97 | 1.04 | 1.04 | 1.00 |
| X020165 | BCG_0347C | 143  | 5  | 4  | 4  | 1.26 | 1.05 | 1.17 | 1.20 | 1.09 | 1.00 |
| X020165 | BCG_0370  | 229  | 5  | 2  | 2  | 0.92 | 0.99 | 0.84 | 0.90 | 1.01 | 1.00 |
| X020165 | BCG_0371  | 78   | 2  | 2  | 2  | 1.24 | 1.03 | 1.08 | 1.13 | 1.11 | 1.00 |
| X020165 | BCG_0372  | 157  | 3  | 2  | 2  | 1.18 | 1.35 | 1.12 | 1.17 | 1.11 | 1.00 |
| X020165 | BCG_0377C | 881  | 24 | 14 | 14 | 0.91 | 1.17 | 0.89 | 0.97 | 0.93 | 1.00 |
| X020165 | BCG_0389  | 1654 | 60 | 29 | 46 | 0.99 | 0.90 | 1.13 | 1.10 | 1.13 | 1.00 |
| X020165 | BCG_0390  | 148  | 5  | 3  | 3  | 0.99 | 1.03 | 0.97 | 1.01 | 0.96 | 1.00 |
| X020165 | BCG_0391  | 491  | 11 | 8  | 8  | 1.09 | 1.15 | 1.11 | 1.15 | 1.10 | 1.00 |
| X020165 | BCG_0395C | 263  | 10 | 6  | 6  | 1.02 | 1.16 | 0.82 | 0.91 | 1.02 | 1.00 |
| X020165 | BCG_0396  | 167  | 5  | 3  | 3  | 0.99 | 1.19 | 0.90 | 0.93 | 0.95 | 1.00 |
| X020165 | BCG_0401C | 567  | 12 | 10 | 12 | 1.00 | 0.87 | 0.96 | 1.00 | 1.06 | 1.00 |

|         |           |      |    |    |    |      |      |      |      |      |      |
|---------|-----------|------|----|----|----|------|------|------|------|------|------|
| X020165 | BCG_0402  | 80   | 4  | 3  | 3  | 1.12 | 0.90 | 1.05 | 1.02 | 1.09 | 1.00 |
| X020165 | BCG_0403C | 308  | 6  | 4  | 4  | 0.98 | 0.85 | 1.01 | 0.96 | 0.99 | 1.00 |
| X020165 | BCG_0417  | 212  | 6  | 5  | 6  | 1.13 | 0.89 | 0.93 | 1.08 | 1.07 | 1.00 |
| X020165 | BCG_0420C | 130  | 3  | 2  | 2  | 0.98 | 0.86 | 0.83 | 0.90 | 1.00 | 1.00 |
| X020165 | BCG_0421C | 158  | 5  | 3  | 3  | 1.18 | 1.00 | 1.10 | 1.02 | 1.16 | 1.00 |
| X020165 | BCG_0422C | 1365 | 33 | 23 | 23 | 0.88 | 0.91 | 0.85 | 0.91 | 1.06 | 1.00 |
| X020165 | BCG_0426  | 186  | 3  | 3  | 3  | 0.94 | 1.26 | 0.88 | 0.99 | 0.94 | 1.00 |
| X020165 | BCG_0431C | 241  | 5  | 4  | 4  | 0.98 | 0.94 | 0.95 | 0.95 | 0.99 | 1.00 |
| X020165 | BCG_0437C | 567  | 14 | 11 | 11 | 1.04 | 0.86 | 0.91 | 0.91 | 0.97 | 1.00 |
| X020165 | BCG_0445C | 293  | 6  | 5  | 5  | 0.99 | 0.97 | 0.93 | 0.94 | 1.01 | 1.00 |
| X020165 | BCG_0446  | 464  | 10 | 8  | 8  | 0.89 | 0.80 | 0.81 | 0.91 | 0.99 | 1.00 |
| X020165 | BCG_0447  | 271  | 8  | 6  | 6  | 1.03 | 1.18 | 1.04 | 1.05 | 1.01 | 1.00 |
| X020165 | BCG_0449C | 255  | 8  | 3  | 3  | 0.85 | 0.88 | 0.91 | 0.92 | 1.08 | 1.00 |
| X020165 | BCG_0450C | 155  | 5  | 3  | 3  | 1.05 | 1.06 | 1.04 | 1.01 | 1.00 | 1.00 |
| X020165 | BCG_0451C | 154  | 6  | 4  | 4  | 1.12 | 1.10 | 1.09 | 1.04 | 0.91 | 1.00 |
| X020165 | BCG_0457  | 548  | 12 | 11 | 11 | 0.89 | 0.91 | 0.98 | 0.92 | 0.97 | 1.00 |
| X020165 | BCG_0461C | 141  | 2  | 2  | 2  | 0.92 | 0.91 | 0.90 | 1.09 | 0.93 | 1.00 |
| X020165 | BCG_0462C | 406  | 10 | 5  | 5  | 0.85 | 1.14 | 0.81 | 0.79 | 0.88 | 1.00 |
| X020165 | BCG_0466C | 142  | 3  | 3  | 3  | 1.24 | 0.89 | 1.12 | 1.16 | 1.23 | 1.00 |
| X020165 | BCG_0468C | 157  | 4  | 3  | 3  | 1.19 | 1.33 | 0.99 | 1.18 | 1.04 | 1.00 |
| X020165 | BCG_0470  | 117  | 2  | 2  | 2  | 1.02 | 1.24 | 1.05 | 1.09 | 1.04 | 1.00 |
| X020165 | BCG_0471  | 163  | 3  | 3  | 3  | 1.01 | 1.34 | 1.02 | 1.07 | 0.90 | 1.00 |
| X020165 | BCG_0472  | 204  | 7  | 3  | 3  | 0.92 | 1.26 | 0.92 | 0.98 | 1.16 | 1.00 |
| X020165 | BCG_0474C | 233  | 6  | 4  | 4  | 0.89 | 0.88 | 0.80 | 0.86 | 0.88 | 1.00 |
| X020165 | BCG_0476C | 210  | 4  | 4  | 4  | 1.00 | 0.87 | 1.01 | 1.01 | 0.94 | 1.00 |
| X020165 | BCG_0478C | 232  | 6  | 2  | 2  | 1.25 | 0.93 | 1.06 | 1.00 | 1.40 | 1.00 |
| X020165 | BCG_0479  | 2355 | 94 | 30 | 63 | 0.98 | 0.78 | 1.01 | 1.01 | 1.07 | 1.00 |
| X020165 | BCG_0498  | 165  | 4  | 4  | 4  | 0.87 | 0.92 | 0.88 | 0.90 | 0.92 | 1.00 |
| X020165 | BCG_0502  | 1115 | 22 | 17 | 17 | 0.86 | 0.76 | 0.90 | 0.94 | 1.02 | 1.00 |
| X020165 | BCG_0504C | 436  | 12 | 6  | 9  | 1.11 | 0.98 | 1.03 | 1.01 | 0.99 | 1.00 |
| X020165 | BCG_0505C | 269  | 8  | 5  | 5  | 0.99 | 1.11 | 0.92 | 1.11 | 1.29 | 1.00 |
| X020165 | BCG_0506  | 376  | 10 | 6  | 7  | 1.00 | 0.92 | 1.05 | 1.07 | 1.13 | 1.00 |
| X020165 | BCG_0507  | 560  | 17 | 13 | 13 | 0.89 | 0.88 | 0.89 | 0.92 | 1.04 | 1.00 |
| X020165 | BCG_0508  | 761  | 15 | 12 | 12 | 0.96 | 0.86 | 0.95 | 0.98 | 1.04 | 1.00 |
| X020165 | BCG_0509  | 689  | 15 | 10 | 11 | 0.86 | 0.68 | 0.85 | 0.85 | 1.08 | 1.00 |
| X020165 | BCG_0510C | 625  | 18 | 9  | 12 | 0.91 | 0.95 | 1.06 | 1.01 | 0.98 | 1.00 |
| X020165 | BCG_0513C | 179  | 4  | 3  | 3  | 1.28 | 0.87 | 0.97 | 0.87 | 1.11 | 1.00 |
| X020165 | BCG_0516  | 486  | 13 | 9  | 10 | 1.05 | 0.84 | 1.02 | 1.03 | 1.26 | 1.00 |
| X020165 | BCG_0520C | 348  | 7  | 4  | 4  | 0.66 | 0.82 | 0.78 | 0.78 | 0.93 | 1.00 |
| X020165 | BCG_0521C | 207  | 4  | 2  | 2  | 0.98 | 0.83 | 1.03 | 0.98 | 1.10 | 1.00 |

|         |           |     |    |    |    |      |      |      |      |      |      |
|---------|-----------|-----|----|----|----|------|------|------|------|------|------|
| X020165 | BCG_0525C | 414 | 8  | 4  | 4  | 0.92 | 0.81 | 0.90 | 0.92 | 1.09 | 1.00 |
| X020165 | BCG_0530  | 413 | 8  | 7  | 7  | 0.98 | 0.86 | 0.86 | 0.93 | 1.06 | 1.00 |
| X020165 | BCG_0531  | 231 | 6  | 3  | 3  | 0.94 | 1.24 | 1.15 | 1.03 | 1.05 | 1.00 |
| X020165 | BCG_0532  | 346 | 9  | 6  | 6  | 0.98 | 0.90 | 0.84 | 0.88 | 1.02 | 1.00 |
| X020165 | BCG_0539  | 246 | 4  | 4  | 4  | 1.01 | 1.36 | 1.11 | 1.15 | 1.10 | 1.00 |
| X020165 | BCG_0540  | 283 | 6  | 5  | 5  | 0.89 | 0.87 | 1.06 | 0.92 | 1.03 | 1.00 |
| X020165 | BCG_0542  | 296 | 9  | 3  | 3  | 0.86 | 0.80 | 0.83 | 0.95 | 1.01 | 1.00 |
| X020165 | BCG_0543  | 111 | 2  | 2  | 2  | 0.80 | 0.74 | 0.93 | 0.95 | 1.05 | 1.00 |
| X020165 | BCG_0545  | 167 | 3  | 2  | 2  | 1.11 | 1.01 | 0.96 | 0.96 | 1.05 | 1.00 |
| X020165 | BCG_0546C | 359 | 7  | 7  | 7  | 1.04 | 0.88 | 0.97 | 1.04 | 1.07 | 1.00 |
| X020165 | BCG_0547C | 179 | 6  | 5  | 6  | 0.90 | 0.72 | 0.77 | 0.80 | 0.97 | 1.00 |
| X020165 | BCG_0553  | 185 | 4  | 2  | 2  | 1.37 | 0.77 | 1.13 | 1.31 | 1.26 | 1.00 |
| X020165 | BCG_0554  | 630 | 13 | 7  | 7  | 0.88 | 0.92 | 0.93 | 0.97 | 1.03 | 1.00 |
| X020165 | BCG_0555  | 418 | 9  | 6  | 6  | 0.82 | 0.89 | 0.91 | 0.87 | 0.91 | 1.00 |
| X020165 | BCG_0556  | 250 | 6  | 3  | 3  | 0.87 | 0.83 | 0.86 | 0.95 | 1.07 | 1.00 |
| X020165 | BCG_0566C | 253 | 6  | 4  | 4  | 0.88 | 0.96 | 1.08 | 1.10 | 1.07 | 1.00 |
| X020165 | BCG_0567  | 265 | 7  | 2  | 2  | 0.73 | 0.72 | 0.73 | 0.74 | 0.87 | 1.00 |
| X020165 | BCG_0568  | 319 | 7  | 3  | 3  | 1.18 | 1.27 | 1.27 | 1.35 | 1.28 | 1.00 |
| X020165 | BCG_0569  | 84  | 3  | 2  | 2  | 0.91 | 1.05 | 0.90 | 0.96 | 0.93 | 1.00 |
| X020165 | BCG_0571  | 139 | 6  | 3  | 3  | 1.05 | 1.21 | 1.05 | 1.03 | 0.99 | 1.00 |
| X020165 | BCG_0573  | 645 | 17 | 11 | 12 | 1.02 | 1.40 | 1.15 | 1.11 | 1.15 | 1.00 |
| X020165 | BCG_0577C | 125 | 3  | 2  | 2  | 1.07 | 0.82 | 0.93 | 0.88 | 1.02 | 1.00 |
| X020165 | BCG_0582  | 117 | 3  | 3  | 3  | 0.95 | 1.03 | 1.05 | 0.97 | 0.98 | 1.00 |
| X020165 | BCG_0591C | 273 | 7  | 2  | 2  | 0.84 | 0.75 | 0.92 | 0.87 | 0.99 | 1.00 |
| X020165 | BCG_0592C | 313 | 9  | 3  | 3  | 1.05 | 1.08 | 0.96 | 1.04 | 1.01 | 1.00 |
| X020165 | BCG_0599  | 162 | 7  | 2  | 2  | 1.03 | 1.11 | 1.11 | 1.27 | 1.08 | 1.00 |
| X020165 | BCG_0600  | 111 | 5  | 3  | 3  | 1.50 | 1.29 | 0.95 | 1.08 | 1.02 | 1.00 |
| X020165 | BCG_0603  | 220 | 4  | 3  | 3  | 1.31 | 1.02 | 0.97 | 0.98 | 1.04 | 1.00 |
| X020165 | BCG_0607  | 363 | 6  | 4  | 4  | 1.13 | 1.13 | 1.11 | 1.06 | 1.09 | 1.00 |
| X020165 | BCG_0611C | 672 | 14 | 9  | 9  | 0.98 | 0.83 | 0.84 | 0.91 | 1.12 | 1.00 |
| X020165 | BCG_0613  | 487 | 9  | 7  | 7  | 0.95 | 0.95 | 1.06 | 0.90 | 1.01 | 1.00 |
| X020165 | BCG_0621  | 209 | 5  | 3  | 3  | 1.13 | 0.86 | 1.09 | 1.13 | 1.18 | 1.00 |
| X020165 | BCG_0625C | 169 | 5  | 4  | 5  | 1.07 | 0.83 | 1.16 | 1.03 | 1.14 | 1.00 |
| X020165 | BCG_0660C | 379 | 10 | 6  | 6  | 0.91 | 1.39 | 0.95 | 0.94 | 1.01 | 1.00 |
| X020165 | BCG_0680C | 148 | 5  | 4  | 4  | 0.67 | 0.76 | 0.74 | 0.71 | 0.71 | 1.00 |
| X020165 | BCG_0681C | 255 | 5  | 3  | 3  | 1.53 | 1.02 | 1.42 | 1.19 | 1.14 | 1.00 |
| X020165 | BCG_0683  | 78  | 6  | 2  | 2  | 0.92 | 1.03 | 1.27 | 1.26 | 1.09 | 1.00 |
| X020165 | BCG_0684  | 187 | 7  | 3  | 3  | 0.98 | 0.76 | 0.91 | 0.91 | 1.06 | 1.00 |
| X020165 | BCG_0685  | 321 | 8  | 8  | 8  | 1.06 | 0.89 | 0.94 | 1.07 | 1.10 | 1.00 |
| X020165 | BCG_0686  | 302 | 11 | 6  | 7  | 1.07 | 1.04 | 1.77 | 1.07 | 1.10 | 1.00 |

|         |           |      |     |    |    |      |      |      |      |      |      |
|---------|-----------|------|-----|----|----|------|------|------|------|------|------|
| X020165 | BCG_0687  | 242  | 6   | 3  | 4  | 0.98 | 1.18 | 1.10 | 1.04 | 0.99 | 1.00 |
| X020165 | BCG_0688  | 428  | 10  | 3  | 4  | 1.05 | 0.83 | 0.99 | 1.05 | 1.14 | 1.00 |
| X020165 | BCG_0689  | 475  | 12  | 8  | 10 | 0.83 | 0.79 | 1.00 | 0.93 | 0.91 | 1.00 |
| X020165 | BCG_0690  | 920  | 29  | 16 | 20 | 1.03 | 1.04 | 1.14 | 0.98 | 0.99 | 1.00 |
| X020165 | BCG_0691C | 443  | 10  | 6  | 6  | 0.99 | 0.86 | 0.94 | 0.93 | 1.07 | 1.00 |
| X020165 | BCG_0692C | 77   | 2   | 2  | 2  | 1.11 | 0.84 | 1.01 | 1.21 | 1.11 | 1.00 |
| X020165 | BCG_0693C | 208  | 3   | 3  | 3  | 1.06 | 1.08 | 0.97 | 0.96 | 1.14 | 1.00 |
| X020165 | BCG_0695C | 323  | 8   | 5  | 6  | 0.87 | 0.96 | 0.80 | 0.78 | 0.88 | 1.00 |
| X020165 | BCG_0696C | 435  | 12  | 6  | 6  | 1.06 | 0.97 | 0.92 | 1.02 | 1.18 | 1.00 |
| X020165 | BCG_0700  | 739  | 20  | 11 | 16 | 0.93 | 0.89 | 1.09 | 0.95 | 0.96 | 1.00 |
| X020165 | BCG_0701  | 381  | 17  | 6  | 12 | 1.21 | 1.02 | 1.21 | 1.17 | 1.06 | 1.00 |
| X020165 | BCG_0704  | 415  | 11  | 6  | 6  | 0.82 | 1.01 | 0.91 | 0.96 | 0.95 | 1.00 |
| X020165 | BCG_0712  | 399  | 9   | 6  | 6  | 0.94 | 0.91 | 0.85 | 0.89 | 0.92 | 1.00 |
| X020165 | BCG_0716  | 2680 | 81  | 43 | 57 | 0.93 | 1.12 | 0.95 | 0.97 | 1.13 | 1.00 |
| X020165 | BCG_0717  | 4495 | 119 | 75 | 89 | 0.89 | 1.07 | 0.94 | 0.93 | 1.12 | 1.00 |
| X020165 | BCG_0719  | 215  | 3   | 3  | 3  | 1.03 | 0.94 | 0.92 | 0.94 | 0.98 | 1.00 |
| X020165 | BCG_0721  | 155  | 4   | 3  | 3  | 0.88 | 0.88 | 0.70 | 0.86 | 0.81 | 1.00 |
| X020165 | BCG_0725C | 251  | 5   | 2  | 2  | 0.87 | 1.11 | 0.88 | 0.92 | 0.92 | 1.00 |
| X020165 | BCG_0726C | 323  | 6   | 4  | 4  | 0.87 | 0.90 | 0.86 | 0.85 | 0.96 | 1.00 |
| X020165 | BCG_0727  | 276  | 5   | 3  | 3  | 0.94 | 0.73 | 0.98 | 0.93 | 1.06 | 1.00 |
| X020165 | BCG_0731  | 207  | 8   | 3  | 3  | 0.80 | 1.04 | 0.82 | 0.92 | 0.90 | 1.00 |
| X020165 | BCG_0732  | 600  | 23  | 11 | 16 | 0.90 | 0.91 | 0.97 | 1.00 | 1.01 | 1.00 |
| X020165 | BCG_0733  | 1172 | 27  | 17 | 17 | 0.84 | 0.78 | 0.76 | 0.92 | 1.06 | 1.00 |
| X020165 | BCG_0734  | 1473 | 50  | 20 | 31 | 0.95 | 0.74 | 0.88 | 0.89 | 1.08 | 1.00 |
| X020165 | BCG_0735  | 120  | 5   | 2  | 2  | 1.17 | 1.36 | 1.24 | 1.23 | 0.99 | 1.00 |
| X020165 | BCG_0737  | 225  | 6   | 4  | 5  | 0.88 | 0.86 | 0.87 | 0.92 | 1.10 | 1.00 |
| X020165 | BCG_0743  | 246  | 6   | 4  | 4  | 0.91 | 0.94 | 0.98 | 0.91 | 0.98 | 1.00 |
| X020165 | BCG_0750  | 449  | 13  | 9  | 12 | 0.93 | 1.06 | 1.12 | 1.03 | 1.03 | 1.00 |
| X020165 | BCG_0751  | 707  | 21  | 12 | 17 | 0.95 | 0.90 | 0.95 | 0.97 | 1.00 | 1.00 |
| X020165 | BCG_0752  | 460  | 12  | 9  | 10 | 0.91 | 0.95 | 1.06 | 1.02 | 0.95 | 1.00 |
| X020165 | BCG_0753  | 410  | 12  | 7  | 7  | 0.96 | 0.89 | 1.11 | 0.99 | 0.99 | 1.00 |
| X020165 | BCG_0755  | 286  | 12  | 6  | 8  | 0.91 | 0.89 | 1.00 | 0.92 | 0.95 | 1.00 |
| X020165 | BCG_0757  | 1413 | 44  | 25 | 31 | 0.94 | 0.90 | 0.85 | 0.97 | 1.02 | 1.00 |
| X020165 | BCG_0758  | 221  | 11  | 3  | 4  | 0.95 | 0.90 | 0.83 | 0.88 | 1.09 | 1.00 |
| X020165 | BCG_0759  | 192  | 6   | 5  | 5  | 0.93 | 0.99 | 1.12 | 1.26 | 1.08 | 1.00 |
| X020165 | BCG_0760  | 435  | 18  | 8  | 10 | 0.84 | 0.81 | 0.89 | 0.86 | 0.88 | 1.00 |
| X020165 | BCG_0764  | 462  | 19  | 11 | 12 | 0.88 | 0.93 | 1.02 | 0.95 | 0.95 | 1.00 |
| X020165 | BCG_0765  | 231  | 7   | 6  | 6  | 0.91 | 1.08 | 1.06 | 1.05 | 1.01 | 1.00 |
| X020165 | BCG_0766  | 587  | 18  | 10 | 14 | 0.91 | 0.89 | 1.03 | 1.01 | 1.01 | 1.00 |
| X020165 | BCG_0768  | 447  | 19  | 9  | 10 | 0.90 | 0.90 | 1.16 | 1.04 | 1.04 | 1.00 |

|         |           |      |    |    |    |      |      |      |      |      |      |
|---------|-----------|------|----|----|----|------|------|------|------|------|------|
| X020165 | BCG_0769  | 412  | 14 | 7  | 9  | 0.91 | 0.91 | 1.10 | 0.99 | 0.99 | 1.00 |
| X020165 | BCG_0770  | 233  | 9  | 5  | 5  | 0.75 | 0.81 | 0.78 | 0.82 | 0.81 | 1.00 |
| X020165 | BCG_0771  | 762  | 22 | 12 | 14 | 0.86 | 1.20 | 0.89 | 1.07 | 1.18 | 1.00 |
| X020165 | BCG_0772  | 164  | 5  | 3  | 4  | 0.88 | 1.00 | 1.07 | 0.96 | 0.94 | 1.00 |
| X020165 | BCG_0773  | 275  | 8  | 4  | 6  | 0.86 | 0.90 | 1.14 | 0.96 | 0.99 | 1.00 |
| X020165 | BCG_0774  | 204  | 6  | 5  | 5  | 1.01 | 0.95 | 0.98 | 0.98 | 0.98 | 1.00 |
| X020165 | BCG_0780  | 291  | 7  | 5  | 5  | 0.98 | 0.83 | 0.88 | 0.96 | 1.07 | 1.00 |
| X020165 | BCG_0781C | 284  | 7  | 4  | 4  | 1.05 | 0.76 | 0.92 | 0.96 | 1.16 | 1.00 |
| X020165 | BCG_0782  | 342  | 14 | 6  | 6  | 0.91 | 0.90 | 1.13 | 1.04 | 1.05 | 1.00 |
| X020165 | BCG_0783  | 539  | 13 | 11 | 12 | 1.12 | 0.91 | 1.00 | 1.12 | 1.19 | 1.00 |
| X020165 | BCG_0803C | 50   | 2  | 2  | 2  | 0.87 | 1.07 | 0.86 | 0.80 | 0.83 | 1.00 |
| X020165 | BCG_0804C | 650  | 12 | 6  | 6  | 0.97 | 0.90 | 0.92 | 0.98 | 1.02 | 1.00 |
| X020165 | BCG_0809  | 516  | 10 | 7  | 7  | 0.86 | 0.75 | 0.94 | 0.94 | 1.04 | 1.00 |
| X020165 | BCG_0812C | 190  | 3  | 3  | 3  | 1.00 | 0.81 | 0.86 | 0.96 | 1.14 | 1.00 |
| X020165 | BCG_0813C | 718  | 26 | 10 | 15 | 0.85 | 0.70 | 0.82 | 0.86 | 1.04 | 1.00 |
| X020165 | BCG_0824  | 638  | 14 | 10 | 10 | 0.99 | 1.02 | 0.97 | 0.94 | 0.87 | 1.00 |
| X020165 | BCG_0829  | 376  | 9  | 4  | 4  | 0.95 | 0.97 | 0.94 | 0.99 | 0.98 | 1.00 |
| X020165 | BCG_0833  | 132  | 4  | 3  | 3  | 1.02 | 1.19 | 0.95 | 1.02 | 0.98 | 1.00 |
| X020165 | BCG_0835  | 393  | 10 | 7  | 7  | 1.08 | 0.94 | 1.01 | 0.90 | 1.01 | 1.00 |
| X020165 | BCG_0840  | 118  | 2  | 2  | 2  | 1.41 | 1.18 | 1.26 | 1.30 | 1.11 | 1.00 |
| X020165 | BCG_0841  | 261  | 5  | 4  | 4  | 1.03 | 0.92 | 0.98 | 0.98 | 1.11 | 1.00 |
| X020165 | BCG_0850C | 497  | 10 | 6  | 6  | 0.87 | 1.02 | 0.94 | 0.85 | 0.76 | 1.00 |
| X020165 | BCG_0852  | 166  | 6  | 3  | 3  | 0.93 | 0.84 | 1.09 | 1.07 | 1.04 | 1.00 |
| X020165 | BCG_0853  | 82   | 2  | 2  | 2  | 0.90 | 1.05 | 0.80 | 1.18 | 0.92 | 1.00 |
| X020165 | BCG_0855  | 260  | 8  | 4  | 4  | 0.94 | 1.10 | 1.03 | 1.09 | 1.19 | 1.00 |
| X020165 | BCG_0858C | 60   | 3  | 2  | 2  | 0.92 | 1.37 | 0.95 | 0.91 | 0.93 | 1.00 |
| X020165 | BCG_0861  | 372  | 10 | 5  | 5  | 0.94 | 0.91 | 0.86 | 0.95 | 1.06 | 1.00 |
| X020165 | BCG_0863C | 100  | 5  | 2  | 2  | 0.90 | 1.07 | 0.85 | 0.87 | 0.86 | 1.00 |
| X020165 | BCG_0866C | 188  | 5  | 3  | 3  | 1.19 | 0.91 | 1.04 | 1.27 | 1.18 | 1.00 |
| X020165 | BCG_0871  | 148  | 2  | 2  | 2  | 1.02 | 0.98 | 0.89 | 0.80 | 0.99 | 1.00 |
| X020165 | BCG_0877C | 700  | 18 | 12 | 14 | 1.01 | 0.83 | 0.94 | 0.98 | 1.14 | 1.00 |
| X020165 | BCG_0884C | 616  | 15 | 10 | 12 | 1.06 | 0.82 | 1.02 | 1.04 | 1.18 | 1.00 |
| X020165 | BCG_0896C | 142  | 4  | 4  | 4  | 1.11 | 1.07 | 1.11 | 1.07 | 1.05 | 1.00 |
| X020165 | BCG_0905C | 183  | 6  | 2  | 2  | 0.90 | 0.71 | 0.93 | 0.97 | 1.15 | 1.00 |
| X020165 | BCG_0911  | 683  | 13 | 8  | 9  | 0.85 | 0.79 | 0.90 | 0.94 | 1.03 | 1.00 |
| X020165 | BCG_0912  | 1357 | 31 | 22 | 25 | 0.78 | 0.86 | 0.83 | 0.94 | 1.04 | 1.00 |
| X020165 | BCG_0923  | 188  | 8  | 4  | 4  | 1.02 | 1.14 | 1.16 | 1.14 | 1.08 | 1.00 |
| X020165 | BCG_0925  | 1077 | 24 | 18 | 20 | 0.91 | 0.88 | 0.98 | 1.02 | 1.06 | 1.00 |
| X020165 | BCG_0936C | 176  | 5  | 3  | 3  | 1.08 | 0.89 | 1.02 | 1.01 | 1.13 | 1.00 |
| X020165 | BCG_0941C | 130  | 4  | 3  | 3  | 0.81 | 0.87 | 0.75 | 0.99 | 0.95 | 1.00 |



|         |           |     |    |    |    |      |      |      |      |      |      |
|---------|-----------|-----|----|----|----|------|------|------|------|------|------|
| X020165 | BCG_0944  | 195 | 8  | 2  | 2  | 0.98 | 0.86 | 0.90 | 0.88 | 1.04 | 1.00 |
| X020165 | BCG_0948  | 789 | 18 | 14 | 17 | 0.84 | 0.77 | 0.91 | 0.94 | 1.05 | 1.00 |
| X020165 | BCG_0954C | 144 | 3  | 2  | 2  | 0.96 | 1.02 | 0.92 | 1.01 | 0.95 | 1.00 |
| X020165 | BCG_0955C | 468 | 10 | 7  | 7  | 0.97 | 0.79 | 0.92 | 0.92 | 1.09 | 1.00 |
| X020165 | BCG_0957  | 468 | 10 | 8  | 9  | 1.02 | 0.93 | 0.97 | 1.01 | 1.04 | 1.00 |
| X020165 | BCG_0977C | 320 | 8  | 5  | 5  | 1.04 | 1.06 | 0.88 | 0.97 | 0.99 | 1.00 |
| X020165 | BCG_0978C | 203 | 3  | 3  | 3  | 1.09 | 0.83 | 1.11 | 1.10 | 1.19 | 1.00 |
| X020165 | BCG_0979C | 116 | 4  | 3  | 3  | 1.03 | 1.78 | 0.85 | 1.06 | 1.11 | 1.00 |
| X020165 | BCG_0980  | 520 | 11 | 9  | 10 | 0.86 | 0.83 | 0.88 | 0.93 | 1.03 | 1.00 |
| X020165 | BCG_0984C | 197 | 6  | 6  | 6  | 0.94 | 0.97 | 0.89 | 0.98 | 1.08 | 1.00 |
| X020165 | BCG_0985C | 239 | 5  | 4  | 4  | 0.81 | 0.79 | 0.81 | 0.93 | 0.93 | 1.00 |
| X020165 | BCG_0988  | 86  | 2  | 2  | 2  | 0.90 | 0.90 | 0.93 | 1.00 | 1.18 | 1.00 |
| X020165 | BCG_0991C | 79  | 2  | 2  | 2  | 1.25 | 1.70 | 1.25 | 1.22 | 1.10 | 1.00 |
| X020165 | BCG_0999  | 132 | 4  | 3  | 3  | 0.87 | 1.01 | 0.84 | 0.87 | 0.90 | 1.00 |
| X020165 | BCG_1000C | 352 | 8  | 4  | 4  | 0.92 | 0.73 | 0.89 | 0.96 | 1.18 | 1.00 |
| X020165 | BCG_1003  | 156 | 4  | 2  | 2  | 0.96 | 1.17 | 1.09 | 1.08 | 1.01 | 1.00 |
| X020165 | BCG_1005  | 924 | 26 | 17 | 21 | 0.94 | 0.81 | 0.86 | 0.93 | 1.10 | 1.00 |
| X020165 | BCG_1006  | 568 | 14 | 9  | 12 | 1.01 | 0.86 | 0.94 | 0.97 | 1.06 | 1.00 |
| X020165 | BCG_1011  | 296 | 8  | 3  | 3  | 0.83 | 0.78 | 0.82 | 0.88 | 1.01 | 1.00 |
| X020165 | BCG_1012  | 232 | 6  | 4  | 4  | 1.17 | 1.16 | 0.98 | 1.02 | 1.07 | 1.00 |
| X020165 | BCG_1022  | 175 | 5  | 3  | 3  | 1.38 | 0.93 | 1.00 | 1.06 | 1.07 | 1.00 |
| X020165 | BCG_1023  | 362 | 12 | 7  | 7  | 0.81 | 1.14 | 0.94 | 1.02 | 0.96 | 1.00 |
| X020165 | BCG_1036  | 208 | 6  | 4  | 4  | 1.03 | 1.06 | 1.03 | 0.96 | 1.02 | 1.00 |
| X020165 | BCG_1039  | 457 | 6  | 6  | 6  | 1.13 | 0.96 | 0.90 | 0.96 | 1.04 | 1.00 |
| X020165 | BCG_1046C | 202 | 4  | 4  | 4  | 0.98 | 0.91 | 1.03 | 1.06 | 1.09 | 1.00 |
| X020165 | BCG_1049  | 526 | 10 | 5  | 5  | 0.97 | 1.12 | 1.32 | 1.08 | 1.03 | 1.00 |
| X020165 | BCG_1050  | 124 | 5  | 3  | 4  | 1.17 | 1.25 | 0.97 | 0.93 | 1.10 | 1.00 |
| X020165 | BCG_1058  | 284 | 9  | 5  | 5  | 1.03 | 1.00 | 1.05 | 1.04 | 1.13 | 1.00 |
| X020165 | BCG_1064C | 491 | 10 | 6  | 6  | 0.91 | 0.85 | 1.02 | 0.97 | 1.07 | 1.00 |
| X020165 | BCG_1067  | 400 | 11 | 7  | 7  | 0.88 | 1.00 | 0.88 | 0.90 | 0.99 | 1.00 |
| X020165 | BCG_1072C | 303 | 7  | 5  | 5  | 0.86 | 0.93 | 0.97 | 0.91 | 0.91 | 1.00 |
| X020165 | BCG_1074C | 738 | 18 | 11 | 11 | 0.88 | 0.80 | 0.82 | 0.89 | 1.02 | 1.00 |
| X020165 | BCG_1075C | 415 | 9  | 4  | 4  | 1.03 | 1.16 | 1.06 | 1.04 | 1.04 | 1.00 |
| X020165 | BCG_1077  | 71  | 3  | 2  | 2  | 1.06 | 1.95 | 1.03 | 1.23 | 0.96 | 1.00 |
| X020165 | BCG_1078  | 94  | 3  | 2  | 2  | 1.48 | 1.12 | 1.16 | 1.22 | 1.16 | 1.00 |
| X020165 | BCG_1080  | 742 | 13 | 11 | 11 | 0.98 | 1.05 | 1.09 | 1.07 | 1.02 | 1.00 |
| X020165 | BCG_1083  | 152 | 4  | 3  | 3  | 0.98 | 0.96 | 0.82 | 0.95 | 0.95 | 1.00 |
| X020165 | BCG_1114  | 142 | 4  | 2  | 2  | 1.18 | 0.99 | 1.06 | 1.15 | 1.17 | 1.00 |
| X020165 | BCG_1116  | 101 | 3  | 3  | 3  | 1.07 | 0.96 | 0.92 | 0.92 | 1.00 | 1.00 |
| X020165 | BCG_1119  | 95  | 2  | 2  | 2  | 1.39 | 0.97 | 1.28 | 1.29 | 1.15 | 1.00 |

|         |           |      |    |    |    |      |      |      |      |      |      |
|---------|-----------|------|----|----|----|------|------|------|------|------|------|
| X020165 | BCG_1128C | 468  | 10 | 5  | 6  | 1.00 | 0.90 | 0.99 | 0.98 | 1.06 | 1.00 |
| X020165 | BCG_1129C | 324  | 7  | 6  | 6  | 0.96 | 0.84 | 0.78 | 0.82 | 1.00 | 1.00 |
| X020165 | BCG_1132C | 680  | 15 | 10 | 11 | 1.03 | 0.93 | 0.99 | 1.01 | 1.20 | 1.00 |
| X020165 | BCG_1135  | 462  | 9  | 6  | 6  | 0.85 | 0.85 | 0.88 | 0.89 | 1.00 | 1.00 |
| X020165 | BCG_1136  | 283  | 9  | 5  | 6  | 0.92 | 0.85 | 0.97 | 0.93 | 1.02 | 1.00 |
| X020165 | BCG_1138C | 520  | 10 | 9  | 9  | 1.13 | 0.83 | 0.98 | 1.25 | 1.13 | 1.00 |
| X020165 | BCG_1140  | 291  | 9  | 4  | 4  | 0.99 | 0.85 | 0.92 | 1.00 | 1.04 | 1.00 |
| X020165 | BCG_1153  | 814  | 20 | 14 | 15 | 0.97 | 0.82 | 0.91 | 0.92 | 1.08 | 1.00 |
| X020165 | BCG_1154  | 935  | 22 | 13 | 13 | 0.96 | 0.79 | 0.93 | 0.94 | 1.14 | 1.00 |
| X020165 | BCG_1157C | 62   | 2  | 2  | 2  | 0.90 | 1.09 | 0.97 | 1.00 | 0.91 | 1.00 |
| X020165 | BCG_1158C | 703  | 19 | 16 | 16 | 0.91 | 0.83 | 0.94 | 0.95 | 1.05 | 1.00 |
| X020165 | BCG_1159C | 357  | 11 | 6  | 8  | 0.95 | 1.18 | 0.99 | 1.05 | 0.97 | 1.00 |
| X020165 | BCG_1166C | 214  | 7  | 3  | 3  | 1.03 | 0.77 | 1.03 | 1.06 | 1.09 | 1.00 |
| X020165 | BCG_1169C | 286  | 7  | 3  | 4  | 0.76 | 0.78 | 0.87 | 1.05 | 0.99 | 1.00 |
| X020165 | BCG_1179C | 192  | 7  | 4  | 4  | 1.16 | 1.15 | 1.32 | 0.98 | 1.15 | 1.00 |
| X020165 | BCG_1182  | 423  | 13 | 7  | 7  | 1.04 | 1.08 | 0.99 | 1.04 | 1.01 | 1.00 |
| X020165 | BCG_1183  | 351  | 10 | 7  | 8  | 0.93 | 1.00 | 0.91 | 0.95 | 1.04 | 1.00 |
| X020165 | BCG_1194C | 1981 | 47 | 34 | 39 | 0.92 | 0.88 | 0.77 | 0.90 | 1.14 | 1.00 |
| X020165 | BCG_1202  | 64   | 2  | 2  | 2  | 0.90 | 1.02 | 0.90 | 0.91 | 0.97 | 1.00 |
| X020165 | BCG_1203C | 213  | 5  | 2  | 2  | 1.04 | 0.91 | 0.98 | 1.02 | 0.98 | 1.00 |
| X020165 | BCG_1206  | 460  | 10 | 4  | 4  | 1.02 | 1.15 | 0.95 | 1.07 | 1.05 | 1.00 |
| X020165 | BCG_1217  | 110  | 3  | 3  | 3  | 1.06 | 1.00 | 0.92 | 1.30 | 1.26 | 1.00 |
| X020165 | BCG_1221C | 174  | 4  | 3  | 4  | 1.16 | 1.12 | 1.06 | 1.10 | 0.94 | 1.00 |
| X020165 | BCG_1241  | 214  | 4  | 3  | 3  | 1.27 | 1.21 | 1.07 | 1.15 | 1.20 | 1.00 |
| X020165 | BCG_1252  | 420  | 9  | 6  | 6  | 0.83 | 0.74 | 0.90 | 0.81 | 0.94 | 1.00 |
| X020165 | BCG_1253  | 296  | 7  | 4  | 4  | 0.95 | 0.83 | 0.86 | 0.94 | 1.03 | 1.00 |
| X020165 | BCG_1261C | 485  | 13 | 8  | 9  | 0.92 | 1.01 | 0.87 | 0.95 | 1.03 | 1.00 |
| X020165 | BCG_1262  | 232  | 6  | 5  | 5  | 1.12 | 1.11 | 0.90 | 0.97 | 0.98 | 1.00 |
| X020165 | BCG_1266  | 374  | 10 | 5  | 5  | 0.96 | 0.89 | 0.93 | 0.88 | 1.06 | 1.00 |
| X020165 | BCG_1269  | 120  | 5  | 2  | 2  | 0.75 | 0.95 | 0.88 | 0.88 | 0.81 | 1.00 |
| X020165 | BCG_1277C | 107  | 3  | 2  | 2  | 1.07 | 1.18 | 1.01 | 1.12 | 0.92 | 1.00 |
| X020165 | BCG_1278C | 256  | 6  | 5  | 5  | 1.06 | 1.04 | 1.30 | 1.02 | 1.06 | 1.00 |
| X020165 | BCG_1283  | 902  | 16 | 13 | 13 | 0.95 | 0.94 | 1.11 | 1.03 | 1.04 | 1.00 |
| X020165 | BCG_1289C | 331  | 7  | 7  | 7  | 0.98 | 1.06 | 1.04 | 1.04 | 1.02 | 1.00 |
| X020165 | BCG_1294  | 150  | 4  | 2  | 2  | 0.89 | 1.18 | 0.96 | 0.91 | 0.81 | 1.00 |
| X020165 | BCG_1298  | 200  | 5  | 4  | 4  | 0.94 | 1.16 | 0.93 | 0.97 | 0.99 | 1.00 |
| X020165 | BCG_1300  | 1065 | 19 | 15 | 17 | 1.02 | 0.97 | 0.93 | 0.98 | 1.15 | 1.00 |
| X020165 | BCG_1305C | 445  | 9  | 9  | 9  | 1.02 | 0.97 | 0.93 | 1.01 | 1.00 | 1.00 |
| X020165 | BCG_1308C | 1586 | 45 | 25 | 25 | 0.86 | 1.06 | 0.94 | 0.99 | 1.14 | 1.00 |
| X020165 | BCG_1313  | 466  | 11 | 4  | 4  | 0.73 | 1.06 | 0.87 | 0.91 | 0.80 | 1.00 |

|         |           |      |    |    |    |      |      |      |      |      |      |
|---------|-----------|------|----|----|----|------|------|------|------|------|------|
| X020165 | BCG_1320C | 198  | 5  | 4  | 4  | 1.05 | 0.89 | 1.04 | 1.05 | 1.06 | 1.00 |
| X020165 | BCG_1322  | 243  | 8  | 3  | 3  | 1.05 | 1.09 | 0.83 | 1.07 | 0.95 | 1.00 |
| X020165 | BCG_1324  | 182  | 5  | 2  | 2  | 0.87 | 1.04 | 1.00 | 1.00 | 1.00 | 1.00 |
| X020165 | BCG_1326C | 134  | 4  | 2  | 2  | 0.95 | 0.69 | 0.85 | 0.98 | 1.02 | 1.00 |
| X020165 | BCG_1328C | 120  | 3  | 2  | 2  | 1.05 | 1.39 | 1.13 | 1.17 | 0.94 | 1.00 |
| X020165 | BCG_1329C | 323  | 5  | 4  | 4  | 1.04 | 1.16 | 1.04 | 1.10 | 1.03 | 1.00 |
| X020165 | BCG_1333  | 84   | 3  | 3  | 3  | 1.02 | 1.26 | 1.12 | 1.09 | 0.99 | 1.00 |
| X020165 | BCG_1334  | 339  | 7  | 6  | 6  | 0.91 | 0.94 | 1.01 | 0.98 | 0.92 | 1.00 |
| X020165 | BCG_1338  | 218  | 6  | 2  | 2  | 0.91 | 0.97 | 1.01 | 0.90 | 1.02 | 1.00 |
| X020165 | BCG_1339C | 216  | 7  | 4  | 4  | 1.02 | 1.02 | 1.15 | 1.08 | 1.10 | 1.00 |
| X020165 | BCG_1340C | 321  | 8  | 3  | 3  | 0.82 | 0.86 | 0.85 | 0.95 | 0.95 | 1.00 |
| X020165 | BCG_1342C | 206  | 5  | 3  | 3  | 0.86 | 1.02 | 0.96 | 0.89 | 0.85 | 1.00 |
| X020165 | BCG_1343  | 141  | 3  | 2  | 2  | 0.90 | 0.81 | 0.91 | 0.87 | 1.08 | 1.00 |
| X020165 | BCG_1352  | 435  | 7  | 5  | 5  | 0.92 | 0.84 | 1.01 | 1.00 | 1.11 | 1.00 |
| X020165 | BCG_1353  | 353  | 6  | 3  | 3  | 0.93 | 0.91 | 0.86 | 0.91 | 1.12 | 1.00 |
| X020165 | BCG_1354  | 547  | 12 | 9  | 9  | 0.95 | 1.47 | 1.07 | 1.08 | 1.02 | 1.00 |
| X020165 | BCG_1355  | 388  | 9  | 5  | 6  | 1.00 | 0.82 | 0.94 | 0.97 | 1.09 | 1.00 |
| X020165 | BCG_1357  | 1326 | 32 | 22 | 23 | 0.82 | 0.86 | 0.90 | 0.95 | 0.96 | 1.00 |
| X020165 | BCG_1359  | 204  | 5  | 3  | 3  | 0.96 | 1.19 | 0.88 | 0.96 | 0.94 | 1.00 |
| X020165 | BCG_1361  | 111  | 3  | 3  | 3  | 1.14 | 1.32 | 1.12 | 1.25 | 1.13 | 1.00 |
| X020165 | BCG_1364  | 80   | 4  | 2  | 3  | 1.00 | 1.50 | 1.18 | 1.05 | 1.01 | 1.00 |
| X020165 | BCG_1367  | 808  | 18 | 12 | 13 | 0.98 | 1.04 | 1.16 | 1.10 | 1.06 | 1.00 |
| X020165 | BCG_1368  | 1303 | 37 | 24 | 25 | 0.83 | 0.79 | 0.91 | 0.88 | 0.98 | 1.00 |
| X020165 | BCG_1369  | 536  | 13 | 7  | 7  | 0.90 | 0.95 | 0.97 | 0.97 | 0.96 | 1.00 |
| X020165 | BCG_1370  | 1080 | 29 | 16 | 21 | 0.93 | 0.81 | 1.03 | 0.97 | 1.08 | 1.00 |
| X020165 | BCG_1371  | 176  | 5  | 2  | 2  | 1.09 | 0.90 | 1.03 | 1.03 | 1.07 | 1.00 |
| X020165 | BCG_1376  | 213  | 5  | 4  | 4  | 0.94 | 1.12 | 0.86 | 1.02 | 1.02 | 1.00 |
| X020165 | BCG_1385  | 939  | 15 | 10 | 11 | 0.93 | 0.78 | 0.98 | 0.95 | 1.09 | 1.00 |
| X020165 | BCG_1386  | 502  | 8  | 5  | 5  | 1.10 | 0.80 | 1.01 | 1.09 | 1.25 | 1.00 |
| X020165 | BCG_1389C | 958  | 22 | 13 | 15 | 1.02 | 0.95 | 1.08 | 1.00 | 1.05 | 1.00 |
| X020165 | BCG_1390  | 740  | 15 | 12 | 12 | 0.99 | 1.03 | 0.94 | 1.00 | 1.09 | 1.00 |
| X020165 | BCG_1398  | 63   | 2  | 2  | 2  | 1.08 | 1.55 | 0.95 | 1.13 | 1.05 | 1.00 |
| X020165 | BCG_1402  | 186  | 3  | 3  | 3  | 0.93 | 0.92 | 1.02 | 1.02 | 1.03 | 1.00 |
| X020165 | BCG_1422  | 93   | 3  | 2  | 2  | 0.92 | 1.22 | 0.98 | 0.93 | 0.98 | 1.00 |
| X020165 | BCG_1425C | 310  | 6  | 4  | 4  | 0.89 | 0.88 | 0.99 | 0.98 | 1.01 | 1.00 |
| X020165 | BCG_1429C | 331  | 8  | 3  | 3  | 1.02 | 1.06 | 0.99 | 0.89 | 0.96 | 1.00 |
| X020165 | BCG_1440  | 257  | 7  | 3  | 3  | 1.16 | 1.06 | 0.98 | 1.02 | 0.96 | 1.00 |
| X020165 | BCG_1441  | 215  | 5  | 3  | 3  | 1.15 | 1.25 | 1.24 | 1.19 | 0.99 | 1.00 |
| X020165 | BCG_1445  | 347  | 11 | 6  | 6  | 1.00 | 1.21 | 0.96 | 1.02 | 1.00 | 1.00 |
| X020165 | BCG_1449  | 370  | 15 | 7  | 10 | 1.12 | 1.22 | 1.10 | 1.48 | 1.55 | 1.00 |

|         |           |      |    |    |    |      |      |      |      |      |      |
|---------|-----------|------|----|----|----|------|------|------|------|------|------|
| X020165 | BCG_1451  | 101  | 2  | 2  | 2  | 1.07 | 1.02 | 0.96 | 0.99 | 0.86 | 1.00 |
| X020165 | BCG_1452  | 321  | 9  | 5  | 5  | 0.91 | 1.11 | 1.00 | 0.94 | 0.92 | 1.00 |
| X020165 | BCG_1453  | 448  | 14 | 8  | 9  | 0.98 | 1.17 | 1.02 | 1.03 | 1.08 | 1.00 |
| X020165 | BCG_1458C | 84   | 3  | 2  | 2  | 0.96 | 1.08 | 0.79 | 0.94 | 0.95 | 1.00 |
| X020165 | BCG_1465  | 233  | 5  | 3  | 3  | 0.99 | 0.94 | 0.91 | 1.01 | 1.03 | 1.00 |
| X020165 | BCG_1470  | 375  | 8  | 5  | 5  | 0.90 | 1.10 | 0.89 | 1.16 | 1.03 | 1.00 |
| X020165 | BCG_1472C | 292  | 11 | 5  | 6  | 1.05 | 1.00 | 1.02 | 1.06 | 0.97 | 1.00 |
| X020165 | BCG_1473  | 188  | 5  | 3  | 3  | 1.09 | 0.91 | 0.94 | 0.95 | 1.00 | 1.00 |
| X020165 | BCG_1477  | 221  | 5  | 5  | 5  | 0.98 | 0.85 | 0.98 | 1.01 | 1.01 | 1.00 |
| X020165 | BCG_1482  | 255  | 8  | 4  | 5  | 0.96 | 1.11 | 1.01 | 1.04 | 1.08 | 1.00 |
| X020165 | BCG_1483  | 130  | 3  | 2  | 2  | 1.13 | 1.01 | 1.01 | 1.03 | 1.10 | 1.00 |
| X020165 | BCG_1484  | 371  | 7  | 3  | 3  | 1.00 | 1.03 | 1.07 | 1.09 | 1.13 | 1.00 |
| X020165 | BCG_1488C | 198  | 6  | 3  | 3  | 0.88 | 0.82 | 0.78 | 0.90 | 0.89 | 1.00 |
| X020165 | BCG_1497  | 643  | 13 | 9  | 11 | 0.90 | 0.82 | 0.87 | 0.96 | 1.05 | 1.00 |
| X020165 | BCG_1498  | 595  | 8  | 7  | 7  | 0.91 | 0.75 | 0.82 | 0.86 | 1.04 | 1.00 |
| X020165 | BCG_1499  | 331  | 9  | 6  | 6  | 0.97 | 0.79 | 0.85 | 0.92 | 1.07 | 1.00 |
| X020165 | BCG_1504C | 90   | 4  | 2  | 2  | 0.82 | 0.75 | 0.87 | 0.80 | 0.88 | 1.00 |
| X020165 | BCG_1506C | 257  | 5  | 4  | 4  | 1.20 | 0.85 | 1.08 | 1.09 | 1.19 | 1.00 |
| X020165 | BCG_1507C | 237  | 8  | 6  | 6  | 1.01 | 1.25 | 0.99 | 1.06 | 1.06 | 1.00 |
| X020165 | BCG_1508C | 286  | 12 | 6  | 6  | 1.02 | 1.05 | 0.95 | 0.99 | 1.06 | 1.00 |
| X020165 | BCG_1509C | 657  | 14 | 13 | 13 | 1.03 | 0.84 | 0.93 | 0.99 | 1.14 | 1.00 |
| X020165 | BCG_1510C | 782  | 23 | 12 | 12 | 0.97 | 0.86 | 0.91 | 0.99 | 1.08 | 1.00 |
| X020165 | BCG_1515C | 309  | 6  | 4  | 4  | 0.97 | 1.02 | 1.11 | 0.89 | 1.27 | 1.00 |
| X020165 | BCG_1516  | 128  | 5  | 3  | 3  | 0.90 | 0.90 | 0.97 | 0.94 | 1.00 | 1.00 |
| X020165 | BCG_1519C | 151  | 5  | 3  | 3  | 0.95 | 0.96 | 0.99 | 0.99 | 1.07 | 1.00 |
| X020165 | BCG_1522  | 356  | 9  | 6  | 6  | 0.86 | 0.88 | 1.00 | 0.96 | 0.99 | 1.00 |
| X020165 | BCG_1523  | 562  | 13 | 11 | 11 | 1.01 | 0.96 | 0.99 | 1.00 | 1.09 | 1.00 |
| X020165 | BCG_1524  | 517  | 10 | 7  | 8  | 0.92 | 0.77 | 0.94 | 0.92 | 1.01 | 1.00 |
| X020165 | BCG_1525  | 520  | 8  | 6  | 6  | 0.89 | 0.80 | 0.87 | 0.92 | 1.12 | 1.00 |
| X020165 | BCG_1526  | 158  | 3  | 2  | 2  | 1.15 | 0.91 | 1.15 | 1.11 | 1.09 | 1.00 |
| X020165 | BCG_1537C | 1567 | 41 | 22 | 22 | 0.94 | 0.98 | 0.86 | 0.91 | 1.18 | 1.00 |
| X020165 | BCG_1538  | 144  | 2  | 2  | 2  | 1.03 | 1.58 | 1.24 | 1.18 | 1.00 | 1.00 |
| X020165 | BCG_1541  | 938  | 23 | 17 | 20 | 1.15 | 0.92 | 1.06 | 1.08 | 1.17 | 1.00 |
| X020165 | BCG_1542  | 346  | 11 | 6  | 6  | 0.97 | 0.82 | 1.07 | 1.09 | 1.16 | 1.00 |
| X020165 | BCG_1543  | 249  | 8  | 5  | 5  | 0.90 | 0.86 | 0.92 | 0.94 | 1.04 | 1.00 |
| X020165 | BCG_1545  | 404  | 11 | 5  | 5  | 1.01 | 0.92 | 0.99 | 0.99 | 1.07 | 1.00 |
| X020165 | BCG_1546  | 556  | 13 | 10 | 11 | 0.90 | 0.89 | 0.98 | 0.93 | 0.91 | 1.00 |
| X020165 | BCG_1550  | 1108 | 28 | 17 | 18 | 0.85 | 1.00 | 1.07 | 0.97 | 0.97 | 1.00 |
| X020165 | BCG_1555  | 352  | 11 | 6  | 6  | 0.86 | 1.07 | 0.90 | 0.98 | 1.00 | 1.00 |
| X020165 | BCG_1556  | 572  | 10 | 5  | 5  | 0.89 | 0.87 | 0.94 | 0.99 | 1.09 | 1.00 |

|         |           |      |    |    |    |      |      |      |      |      |      |
|---------|-----------|------|----|----|----|------|------|------|------|------|------|
| X020165 | BCG_1560  | 142  | 5  | 3  | 3  | 0.98 | 1.21 | 0.98 | 1.05 | 0.93 | 1.00 |
| X020165 | BCG_1575  | 50   | 2  | 2  | 2  | 1.00 | 1.31 | 1.08 | 0.81 | 0.91 | 1.00 |
| X020165 | BCG_1579C | 874  | 25 | 18 | 18 | 1.00 | 1.28 | 1.01 | 1.09 | 1.07 | 1.00 |
| X020165 | BCG_1583  | 170  | 3  | 2  | 2  | 1.02 | 0.91 | 1.11 | 0.99 | 1.22 | 1.00 |
| X020165 | BCG_1585  | 215  | 8  | 4  | 5  | 0.90 | 0.82 | 0.90 | 1.02 | 0.90 | 1.00 |
| X020165 | BCG_1588  | 91   | 5  | 2  | 2  | 0.89 | 1.17 | 0.85 | 1.00 | 1.03 | 1.00 |
| X020165 | BCG_1590C | 120  | 4  | 3  | 3  | 1.06 | 0.90 | 0.90 | 1.00 | 1.02 | 1.00 |
| X020165 | BCG_1595  | 1066 | 22 | 14 | 15 | 1.04 | 0.89 | 1.00 | 0.94 | 1.01 | 1.00 |
| X020165 | BCG_1599  | 127  | 3  | 2  | 2  | 1.17 | 1.15 | 1.20 | 1.21 | 1.22 | 1.00 |
| X020165 | BCG_1600  | 143  | 8  | 3  | 3  | 0.93 | 0.91 | 0.83 | 0.92 | 0.92 | 1.00 |
| X020165 | BCG_1610  | 370  | 9  | 5  | 5  | 1.08 | 0.80 | 1.02 | 1.15 | 1.11 | 1.00 |
| X020165 | BCG_1624  | 266  | 7  | 5  | 5  | 0.92 | 0.89 | 0.98 | 0.97 | 0.95 | 1.00 |
| X020165 | BCG_1627  | 85   | 2  | 2  | 2  | 1.03 | 0.88 | 0.98 | 0.99 | 0.99 | 1.00 |
| X020165 | BCG_1632  | 80   | 2  | 2  | 2  | 0.97 | 0.94 | 0.86 | 0.91 | 0.99 | 1.00 |
| X020165 | BCG_1634  | 160  | 5  | 3  | 3  | 0.91 | 0.76 | 0.84 | 0.97 | 1.03 | 1.00 |
| X020165 | BCG_1637  | 83   | 2  | 2  | 2  | 1.00 | 1.05 | 0.93 | 0.97 | 0.93 | 1.00 |
| X020165 | BCG_1638  | 58   | 3  | 2  | 2  | 0.99 | 1.10 | 1.03 | 1.01 | 1.01 | 1.00 |
| X020165 | BCG_1639  | 100  | 3  | 2  | 2  | 0.91 | 1.13 | 1.19 | 1.13 | 1.03 | 1.00 |
| X020165 | BCG_1641  | 382  | 8  | 6  | 6  | 1.10 | 0.94 | 1.15 | 1.23 | 1.19 | 1.00 |
| X020165 | BCG_1643  | 94   | 2  | 2  | 2  | 0.94 | 0.92 | 0.90 | 0.87 | 1.01 | 1.00 |
| X020165 | BCG_1647  | 334  | 5  | 3  | 3  | 0.99 | 1.01 | 1.06 | 1.02 | 1.08 | 1.00 |
| X020165 | BCG_1649  | 545  | 10 | 7  | 7  | 1.03 | 0.87 | 1.01 | 1.02 | 1.09 | 1.00 |
| X020165 | BCG_1650  | 481  | 8  | 7  | 7  | 0.98 | 0.97 | 0.97 | 1.00 | 1.09 | 1.00 |
| X020165 | BCG_1651  | 551  | 10 | 9  | 9  | 1.02 | 0.96 | 0.90 | 1.00 | 1.04 | 1.00 |
| X020165 | BCG_1652  | 590  | 12 | 8  | 8  | 0.85 | 0.93 | 1.04 | 0.97 | 0.98 | 1.00 |
| X020165 | BCG_1655  | 829  | 18 | 12 | 13 | 0.89 | 0.92 | 0.91 | 0.93 | 1.07 | 1.00 |
| X020165 | BCG_1661C | 150  | 6  | 3  | 3  | 0.91 | 1.38 | 1.06 | 1.16 | 1.04 | 1.00 |
| X020165 | BCG_1664  | 615  | 10 | 7  | 7  | 0.94 | 0.77 | 0.83 | 0.84 | 1.04 | 1.00 |
| X020165 | BCG_1667  | 596  | 16 | 8  | 8  | 0.84 | 1.05 | 0.92 | 0.94 | 1.05 | 1.00 |
| X020165 | BCG_1668  | 1643 | 63 | 32 | 44 | 0.94 | 0.94 | 1.04 | 0.94 | 0.93 | 1.00 |
| X020165 | BCG_1669  | 216  | 5  | 3  | 3  | 1.06 | 0.96 | 0.93 | 0.99 | 1.04 | 1.00 |
| X020165 | BCG_1674  | 525  | 12 | 9  | 10 | 1.16 | 0.95 | 1.03 | 1.15 | 1.17 | 1.00 |
| X020165 | BCG_1675C | 103  | 2  | 2  | 2  | 0.80 | 0.75 | 0.98 | 0.89 | 1.04 | 1.00 |
| X020165 | BCG_1676  | 1354 | 31 | 23 | 23 | 1.01 | 1.22 | 0.99 | 0.95 | 1.08 | 1.00 |
| X020165 | BCG_1680  | 445  | 14 | 10 | 11 | 0.93 | 1.17 | 1.03 | 1.09 | 1.23 | 1.00 |
| X020165 | BCG_1682  | 238  | 9  | 3  | 4  | 0.88 | 0.89 | 1.14 | 1.07 | 1.03 | 1.00 |
| X020165 | BCG_1683  | 94   | 3  | 2  | 2  | 1.02 | 1.03 | 1.01 | 0.93 | 0.98 | 1.00 |
| X020165 | BCG_1688  | 231  | 8  | 4  | 4  | 0.72 | 0.82 | 1.25 | 0.79 | 0.83 | 1.00 |
| X020165 | BCG_1689  | 507  | 13 | 7  | 7  | 0.93 | 1.10 | 0.96 | 1.03 | 0.97 | 1.00 |
| X020165 | BCG_1691  | 246  | 4  | 3  | 3  | 1.02 | 0.89 | 0.92 | 0.95 | 1.04 | 1.00 |

|         |           |      |    |    |    |      |      |      |      |      |      |
|---------|-----------|------|----|----|----|------|------|------|------|------|------|
| X020165 | BCG_1692  | 200  | 5  | 3  | 3  | 0.98 | 0.87 | 0.85 | 0.90 | 0.91 | 1.00 |
| X020165 | BCG_1693  | 240  | 7  | 3  | 3  | 0.89 | 0.85 | 0.94 | 0.95 | 1.06 | 1.00 |
| X020165 | BCG_1694  | 252  | 6  | 4  | 4  | 1.04 | 0.96 | 0.92 | 0.99 | 1.04 | 1.00 |
| X020165 | BCG_1695  | 120  | 3  | 3  | 3  | 0.94 | 0.88 | 0.85 | 0.85 | 1.10 | 1.00 |
| X020165 | BCG_1697  | 600  | 13 | 10 | 10 | 0.89 | 0.91 | 0.88 | 1.00 | 0.97 | 1.00 |
| X020165 | BCG_1698  | 232  | 4  | 4  | 4  | 1.01 | 1.11 | 0.97 | 1.00 | 0.96 | 1.00 |
| X020165 | BCG_1717  | 246  | 4  | 3  | 3  | 1.05 | 1.05 | 1.18 | 1.06 | 1.11 | 1.00 |
| X020165 | BCG_1718  | 95   | 3  | 2  | 2  | 1.20 | 1.07 | 1.17 | 1.08 | 1.03 | 1.00 |
| X020165 | BCG_1721  | 374  | 12 | 6  | 6  | 0.90 | 1.09 | 0.88 | 0.92 | 1.08 | 1.00 |
| X020165 | BCG_1727  | 284  | 5  | 3  | 3  | 1.01 | 0.83 | 0.90 | 0.89 | 1.09 | 1.00 |
| X020165 | BCG_1729  | 359  | 5  | 4  | 4  | 0.99 | 1.04 | 1.17 | 1.13 | 1.03 | 1.00 |
| X020165 | BCG_1730  | 170  | 3  | 2  | 2  | 0.86 | 1.09 | 0.75 | 0.89 | 0.91 | 1.00 |
| X020165 | BCG_1733  | 149  | 4  | 2  | 2  | 0.95 | 1.03 | 0.91 | 0.96 | 0.88 | 1.00 |
| X020165 | BCG_1737  | 96   | 2  | 2  | 2  | 0.98 | 0.90 | 0.95 | 1.07 | 1.02 | 1.00 |
| X020165 | BCG_1741C | 371  | 9  | 7  | 8  | 1.05 | 0.93 | 0.96 | 0.98 | 1.12 | 1.00 |
| X020165 | BCG_1747  | 220  | 6  | 4  | 4  | 0.88 | 1.07 | 0.93 | 1.10 | 0.94 | 1.00 |
| X020165 | BCG_1749  | 87   | 4  | 2  | 2  | 1.05 | 1.13 | 1.02 | 0.96 | 1.13 | 1.00 |
| X020165 | BCG_1750  | 444  | 8  | 6  | 7  | 0.87 | 0.91 | 0.99 | 0.97 | 0.98 | 1.00 |
| X020165 | BCG_1751  | 83   | 3  | 2  | 2  | 0.96 | 0.78 | 1.01 | 0.97 | 1.21 | 1.00 |
| X020165 | BCG_1770  | 475  | 17 | 9  | 9  | 0.89 | 0.87 | 0.94 | 0.95 | 0.96 | 1.00 |
| X020165 | BCG_1771C | 198  | 5  | 3  | 3  | 1.12 | 0.91 | 1.03 | 1.10 | 1.12 | 1.00 |
| X020165 | BCG_1777  | 100  | 2  | 2  | 2  | 1.06 | 0.92 | 1.95 | 0.93 | 1.00 | 1.00 |
| X020165 | BCG_1786  | 182  | 6  | 2  | 2  | 0.93 | 1.04 | 1.05 | 1.06 | 0.93 | 1.00 |
| X020165 | BCG_1790  | 147  | 5  | 2  | 2  | 1.03 | 0.90 | 1.13 | 1.11 | 1.10 | 1.00 |
| X020165 | BCG_1803C | 283  | 8  | 4  | 6  | 0.96 | 1.03 | 1.08 | 0.99 | 1.02 | 1.00 |
| X020165 | BCG_1807  | 410  | 11 | 8  | 8  | 1.01 | 1.09 | 0.93 | 0.99 | 1.10 | 1.00 |
| X020165 | BCG_1811C | 117  | 2  | 2  | 2  | 1.05 | 1.30 | 1.05 | 0.97 | 0.97 | 1.00 |
| X020165 | BCG_1812C | 1183 | 29 | 19 | 20 | 1.02 | 1.04 | 1.07 | 1.00 | 1.01 | 1.00 |
| X020165 | BCG_1813  | 507  | 11 | 6  | 7  | 1.04 | 0.81 | 0.99 | 0.94 | 1.07 | 1.00 |
| X020165 | BCG_1815  | 393  | 10 | 7  | 7  | 1.02 | 1.01 | 1.02 | 0.93 | 1.01 | 1.00 |
| X020165 | BCG_1816  | 627  | 17 | 9  | 9  | 1.04 | 1.27 | 1.09 | 1.05 | 1.09 | 1.00 |
| X020165 | BCG_1825  | 261  | 4  | 2  | 3  | 1.02 | 0.90 | 0.77 | 0.75 | 0.80 | 1.00 |
| X020165 | BCG_1826  | 482  | 10 | 5  | 5  | 0.84 | 0.66 | 0.83 | 0.88 | 0.99 | 1.00 |
| X020165 | BCG_1827  | 413  | 9  | 7  | 7  | 0.99 | 1.19 | 1.04 | 1.01 | 0.95 | 1.00 |
| X020165 | BCG_1828  | 180  | 4  | 2  | 2  | 0.90 | 1.20 | 0.94 | 0.92 | 0.96 | 1.00 |
| X020165 | BCG_1846C | 131  | 4  | 2  | 2  | 0.96 | 1.00 | 0.80 | 0.94 | 0.97 | 1.00 |
| X020165 | BCG_1854C | 478  | 14 | 9  | 9  | 0.83 | 1.42 | 0.95 | 1.02 | 0.96 | 1.00 |
| X020165 | BCG_1856  | 744  | 20 | 11 | 11 | 1.04 | 1.07 | 0.99 | 1.02 | 1.07 | 1.00 |
| X020165 | BCG_1862  | 423  | 11 | 7  | 9  | 1.17 | 0.83 | 1.01 | 1.19 | 1.20 | 1.00 |
| X020165 | BCG_1864  | 164  | 5  | 3  | 3  | 0.91 | 1.16 | 0.99 | 1.22 | 1.01 | 1.00 |

|         |           |      |    |    |    |      |      |      |      |      |      |
|---------|-----------|------|----|----|----|------|------|------|------|------|------|
| X020165 | BCG_1868C | 266  | 14 | 5  | 5  | 0.93 | 0.91 | 1.11 | 0.94 | 0.91 | 1.00 |
| X020165 | BCG_1871C | 586  | 10 | 8  | 8  | 0.83 | 0.85 | 0.97 | 0.99 | 1.07 | 1.00 |
| X020165 | BCG_1872C | 1375 | 33 | 24 | 26 | 0.94 | 0.76 | 0.82 | 0.94 | 1.13 | 1.00 |
| X020165 | BCG_1879C | 271  | 8  | 6  | 6  | 0.94 | 1.23 | 0.96 | 1.06 | 1.02 | 1.00 |
| X020165 | BCG_1890C | 466  | 11 | 8  | 8  | 1.30 | 1.13 | 1.01 | 0.94 | 0.97 | 1.00 |
| X020165 | BCG_1891C | 590  | 11 | 10 | 10 | 0.91 | 0.76 | 0.89 | 0.88 | 1.13 | 1.00 |
| X020165 | BCG_1892C | 216  | 8  | 3  | 3  | 1.05 | 1.09 | 0.96 | 0.99 | 0.97 | 1.00 |
| X020165 | BCG_1896  | 126  | 3  | 3  | 3  | 1.18 | 1.03 | 0.99 | 1.25 | 1.04 | 1.00 |
| X020165 | BCG_1901C | 172  | 3  | 3  | 3  | 0.93 | 0.97 | 0.86 | 0.85 | 0.93 | 1.00 |
| X020165 | BCG_1905C | 623  | 11 | 9  | 9  | 0.91 | 0.80 | 0.84 | 0.88 | 1.03 | 1.00 |
| X020165 | BCG_1907C | 99   | 4  | 2  | 2  | 1.15 | 1.21 | 1.02 | 1.17 | 1.17 | 1.00 |
| X020165 | BCG_1912  | 421  | 11 | 7  | 10 | 0.88 | 1.18 | 0.97 | 1.01 | 1.04 | 1.00 |
| X020165 | BCG_1917C | 155  | 6  | 3  | 3  | 1.11 | 1.17 | 1.05 | 0.97 | 1.04 | 1.00 |
| X020165 | BCG_1919C | 106  | 5  | 3  | 3  | 0.84 | 0.84 | 0.79 | 0.73 | 1.10 | 1.00 |
| X020165 | BCG_1920C | 242  | 6  | 4  | 4  | 1.28 | 1.07 | 1.33 | 1.32 | 1.16 | 1.00 |
| X020165 | BCG_1923C | 197  | 4  | 2  | 2  | 0.99 | 0.89 | 1.16 | 1.00 | 1.27 | 1.00 |
| X020165 | BCG_1925C | 324  | 8  | 7  | 7  | 0.85 | 1.07 | 0.97 | 0.99 | 0.93 | 1.00 |
| X020165 | BCG_1940  | 212  | 4  | 2  | 2  | 1.05 | 0.99 | 1.00 | 1.01 | 1.11 | 1.00 |
| X020165 | BCG_1947C | 1340 | 28 | 22 | 24 | 0.84 | 0.74 | 0.77 | 0.96 | 1.09 | 1.00 |
| X020165 | BCG_1951C | 328  | 16 | 6  | 9  | 0.99 | 0.90 | 0.90 | 0.93 | 1.07 | 1.00 |
| X020165 | BCG_1954  | 1751 | 44 | 29 | 31 | 0.83 | 0.87 | 0.94 | 0.95 | 1.04 | 1.00 |
| X020165 | BCG_1958C | 367  | 10 | 8  | 8  | 1.17 | 0.89 | 0.99 | 0.99 | 1.02 | 1.00 |
| X020165 | BCG_1964  | 522  | 12 | 8  | 8  | 0.91 | 1.00 | 1.13 | 0.98 | 1.11 | 1.00 |
| X020165 | BCG_1965C | 56   | 2  | 2  | 2  | 1.21 | 1.61 | 1.11 | 1.15 | 0.88 | 1.00 |
| X020165 | BCG_1968C | 256  | 6  | 5  | 5  | 1.00 | 0.83 | 0.98 | 0.93 | 0.97 | 1.00 |
| X020165 | BCG_1971  | 367  | 7  | 5  | 5  | 1.39 | 1.12 | 1.14 | 1.37 | 1.25 | 1.00 |
| X020165 | BCG_1995  | 161  | 6  | 3  | 3  | 1.08 | 1.17 | 0.96 | 1.08 | 0.99 | 1.00 |
| X020165 | BCG_1996  | 165  | 4  | 3  | 3  | 0.81 | 0.87 | 0.81 | 0.80 | 1.05 | 1.00 |
| X020165 | BCG_2010C | 78   | 2  | 2  | 2  | 1.18 | 0.98 | 0.88 | 0.91 | 0.94 | 1.00 |
| X020165 | BCG_2019  | 223  | 6  | 3  | 3  | 1.02 | 1.04 | 1.02 | 0.99 | 1.00 | 1.00 |
| X020165 | BCG_2022C | 93   | 3  | 3  | 3  | 1.14 | 1.01 | 1.03 | 1.05 | 1.13 | 1.00 |
| X020165 | BCG_2035  | 104  | 4  | 2  | 2  | 1.08 | 1.38 | 1.05 | 1.16 | 0.99 | 1.00 |
| X020165 | BCG_2039C | 60   | 2  | 2  | 2  | 1.24 | 1.38 | 1.16 | 1.08 | 1.14 | 1.00 |
| X020165 | BCG_2047C | 77   | 2  | 2  | 2  | 1.03 | 1.70 | 1.20 | 1.08 | 1.15 | 1.00 |
| X020165 | BCG_2050C | 353  | 11 | 7  | 8  | 1.17 | 1.11 | 1.05 | 1.25 | 1.17 | 1.00 |
| X020165 | BCG_2051  | 231  | 5  | 2  | 2  | 0.83 | 0.77 | 0.93 | 0.86 | 0.74 | 1.00 |
| X020165 | BCG_2066C | 221  | 9  | 6  | 6  | 1.01 | 1.30 | 0.93 | 0.99 | 0.90 | 1.00 |
| X020165 | BCG_2067C | 1617 | 42 | 23 | 24 | 0.91 | 1.02 | 0.97 | 0.90 | 0.74 | 1.00 |
| X020165 | BCG_2070C | 671  | 13 | 9  | 9  | 0.89 | 0.93 | 0.94 | 0.96 | 1.01 | 1.00 |
| X020165 | BCG_2073  | 669  | 22 | 10 | 13 | 0.92 | 0.82 | 0.80 | 0.80 | 0.89 | 1.00 |

|         |           |     |    |    |    |      |      |      |      |      |      |
|---------|-----------|-----|----|----|----|------|------|------|------|------|------|
| X020165 | BCG_2080C | 217 | 5  | 4  | 4  | 1.14 | 1.24 | 1.13 | 1.09 | 1.16 | 1.00 |
| X020165 | BCG_2111C | 269 | 5  | 3  | 3  | 0.77 | 0.73 | 0.88 | 0.83 | 0.97 | 1.00 |
| X020165 | BCG_2112C | 831 | 21 | 11 | 11 | 1.00 | 1.30 | 1.05 | 1.02 | 1.08 | 1.00 |
| X020165 | BCG_2115C | 140 | 4  | 2  | 2  | 1.30 | 1.10 | 1.01 | 1.19 | 1.09 | 1.00 |
| X020165 | BCG_2117C | 797 | 23 | 14 | 15 | 1.01 | 1.15 | 1.07 | 1.05 | 1.07 | 1.00 |
| X020165 | BCG_2120  | 493 | 17 | 6  | 6  | 0.98 | 1.29 | 0.95 | 0.88 | 1.01 | 1.00 |
| X020165 | BCG_2126C | 472 | 11 | 7  | 7  | 0.89 | 0.92 | 1.08 | 1.04 | 1.08 | 1.00 |
| X020165 | BCG_2127C | 434 | 10 | 8  | 8  | 0.92 | 0.99 | 1.13 | 1.02 | 1.04 | 1.00 |
| X020165 | BCG_2128C | 199 | 3  | 2  | 2  | 0.80 | 0.78 | 0.85 | 0.86 | 0.91 | 1.00 |
| X020165 | BCG_2129C | 104 | 4  | 2  | 2  | 0.90 | 1.13 | 0.86 | 0.96 | 0.93 | 1.00 |
| X020165 | BCG_2132C | 631 | 17 | 12 | 12 | 0.99 | 1.07 | 1.13 | 1.05 | 1.01 | 1.00 |
| X020165 | BCG_2135C | 454 | 10 | 8  | 8  | 0.75 | 0.90 | 0.74 | 0.80 | 0.85 | 1.00 |
| X020165 | BCG_2138C | 253 | 7  | 3  | 3  | 1.09 | 1.00 | 0.91 | 0.97 | 1.02 | 1.00 |
| X020165 | BCG_2146C | 381 | 9  | 4  | 4  | 1.04 | 0.85 | 0.92 | 1.05 | 1.01 | 1.00 |
| X020165 | BCG_2147C | 259 | 7  | 4  | 4  | 0.89 | 0.98 | 1.04 | 1.05 | 1.04 | 1.00 |
| X020165 | BCG_2148C | 129 | 3  | 2  | 2  | 1.18 | 0.74 | 0.97 | 1.14 | 0.96 | 1.00 |
| X020165 | BCG_2150C | 326 | 10 | 6  | 7  | 1.03 | 0.93 | 1.18 | 1.00 | 1.01 | 1.00 |
| X020165 | BCG_2151C | 134 | 3  | 2  | 2  | 0.98 | 1.30 | 1.29 | 0.85 | 0.90 | 1.00 |
| X020165 | BCG_2156  | 223 | 5  | 3  | 3  | 0.98 | 0.80 | 0.93 | 1.03 | 0.97 | 1.00 |
| X020165 | BCG_2158C | 316 | 6  | 2  | 2  | 0.95 | 0.66 | 0.88 | 0.89 | 1.11 | 1.00 |
| X020165 | BCG_2162C | 944 | 24 | 15 | 15 | 1.26 | 1.30 | 1.45 | 1.71 | 1.20 | 1.00 |
| X020165 | BCG_2163C | 59  | 2  | 2  | 2  | 1.34 | 1.17 | 1.12 | 1.24 | 1.05 | 1.00 |
| X020165 | BCG_2164C | 122 | 5  | 2  | 2  | 1.11 | 1.50 | 1.14 | 1.26 | 1.09 | 1.00 |
| X020165 | BCG_2165C | 113 | 5  | 3  | 3  | 1.08 | 1.43 | 1.20 | 1.32 | 1.06 | 1.00 |
| X020165 | BCG_2167C | 463 | 9  | 6  | 8  | 1.21 | 0.94 | 1.09 | 0.99 | 1.13 | 1.00 |
| X020165 | BCG_2168C | 286 | 8  | 3  | 3  | 0.86 | 1.08 | 0.91 | 0.96 | 0.95 | 1.00 |
| X020165 | BCG_2170C | 241 | 7  | 3  | 3  | 1.11 | 1.18 | 1.15 | 1.22 | 1.05 | 1.00 |
| X020165 | BCG_2172C | 307 | 7  | 5  | 5  | 1.01 | 0.88 | 0.96 | 1.01 | 1.03 | 1.00 |
| X020165 | BCG_2174C | 218 | 4  | 4  | 4  | 1.08 | 1.04 | 1.07 | 1.05 | 1.07 | 1.00 |
| X020165 | BCG_2182C | 75  | 3  | 2  | 2  | 1.04 | 0.87 | 0.98 | 0.96 | 1.05 | 1.00 |
| X020165 | BCG_2183C | 132 | 5  | 3  | 3  | 0.94 | 1.02 | 0.89 | 1.09 | 1.13 | 1.00 |
| X020165 | BCG_2187C | 329 | 7  | 4  | 5  | 0.90 | 0.79 | 0.84 | 0.89 | 1.10 | 1.00 |
| X020165 | BCG_2188  | 151 | 6  | 3  | 3  | 1.11 | 1.13 | 0.96 | 1.09 | 1.01 | 1.00 |
| X020165 | BCG_2193C | 748 | 18 | 14 | 14 | 0.92 | 0.88 | 0.97 | 0.97 | 1.02 | 1.00 |
| X020165 | BCG_2197C | 176 | 6  | 3  | 3  | 1.05 | 0.95 | 1.21 | 1.09 | 1.13 | 1.00 |
| X020165 | BCG_2200C | 313 | 9  | 6  | 8  | 1.07 | 0.78 | 0.98 | 1.02 | 1.27 | 1.00 |
| X020165 | BCG_2204C | 240 | 6  | 3  | 3  | 1.14 | 1.82 | 1.17 | 1.14 | 0.97 | 1.00 |
| X020165 | BCG_2208C | 244 | 6  | 4  | 4  | 1.00 | 1.13 | 0.85 | 0.90 | 0.94 | 1.00 |
| X020165 | BCG_2210  | 100 | 2  | 2  | 2  | 1.02 | 1.03 | 1.11 | 1.11 | 1.13 | 1.00 |
| X020165 | BCG_2211  | 489 | 13 | 11 | 11 | 0.90 | 0.91 | 0.97 | 0.99 | 1.02 | 1.00 |



|         |           |      |     |    |     |      |      |      |      |      |      |
|---------|-----------|------|-----|----|-----|------|------|------|------|------|------|
| X020165 | BCG_2212  | 315  | 9   | 8  | 8   | 0.92 | 1.05 | 1.02 | 1.00 | 0.97 | 1.00 |
| X020165 | BCG_2214C | 138  | 3   | 3  | 3   | 0.78 | 1.00 | 0.81 | 0.86 | 0.90 | 1.00 |
| X020165 | BCG_2216C | 416  | 13  | 12 | 12  | 0.98 | 1.10 | 1.03 | 1.04 | 1.03 | 1.00 |
| X020165 | BCG_2217  | 263  | 7   | 5  | 5   | 1.02 | 0.87 | 0.99 | 0.99 | 0.99 | 1.00 |
| X020165 | BCG_2218C | 417  | 11  | 8  | 8   | 1.08 | 0.86 | 1.06 | 1.06 | 1.20 | 1.00 |
| X020165 | BCG_2219  | 372  | 7   | 5  | 5   | 0.90 | 0.96 | 1.05 | 1.00 | 1.02 | 1.00 |
| X020165 | BCG_2220C | 242  | 5   | 4  | 4   | 1.08 | 0.97 | 1.10 | 1.31 | 1.11 | 1.00 |
| X020165 | BCG_2223  | 143  | 4   | 2  | 2   | 1.17 | 1.51 | 0.92 | 1.08 | 1.04 | 1.00 |
| X020165 | BCG_2226C | 505  | 11  | 10 | 11  | 1.06 | 0.92 | 0.84 | 0.93 | 1.06 | 1.00 |
| X020165 | BCG_2227C | 298  | 5   | 5  | 5   | 0.98 | 0.74 | 0.91 | 0.99 | 1.11 | 1.00 |
| X020165 | BCG_2230C | 553  | 14  | 9  | 9   | 0.99 | 1.05 | 0.99 | 0.97 | 1.02 | 1.00 |
| X020165 | BCG_2231  | 976  | 20  | 16 | 16  | 0.69 | 0.77 | 0.77 | 0.95 | 0.87 | 1.00 |
| X020165 | BCG_2232  | 357  | 5   | 4  | 4   | 1.04 | 0.97 | 0.94 | 1.13 | 1.21 | 1.00 |
| X020165 | BCG_2235  | 314  | 7   | 6  | 6   | 0.97 | 0.92 | 0.89 | 0.87 | 1.05 | 1.00 |
| X020165 | BCG_2237  | 2096 | 180 | 27 | 103 | 0.90 | 0.82 | 0.94 | 0.86 | 0.87 | 1.00 |
| X020165 | BCG_2239C | 573  | 20  | 8  | 9   | 0.97 | 0.94 | 1.03 | 0.87 | 0.91 | 1.00 |
| X020165 | BCG_2241C | 365  | 11  | 7  | 7   | 0.87 | 1.06 | 0.98 | 1.00 | 0.95 | 1.00 |
| X020165 | BCG_2243  | 572  | 12  | 10 | 10  | 0.89 | 0.92 | 0.92 | 0.88 | 0.98 | 1.00 |
| X020165 | BCG_2248C | 142  | 5   | 2  | 2   | 0.93 | 1.06 | 0.95 | 1.11 | 1.02 | 1.00 |
| X020165 | BCG_2254  | 202  | 4   | 3  | 3   | 1.03 | 0.83 | 1.02 | 1.06 | 1.03 | 1.00 |
| X020165 | BCG_2255C | 146  | 4   | 3  | 3   | 1.10 | 1.08 | 1.18 | 1.19 | 0.96 | 1.00 |
| X020165 | BCG_2258  | 517  | 18  | 11 | 11  | 0.85 | 1.06 | 0.87 | 0.93 | 1.14 | 1.00 |
| X020165 | BCG_2259  | 203  | 7   | 4  | 4   | 1.03 | 1.11 | 1.06 | 1.09 | 1.09 | 1.00 |
| X020165 | BCG_2260  | 121  | 3   | 2  | 2   | 1.18 | 1.08 | 1.03 | 1.14 | 1.18 | 1.00 |
| X020165 | BCG_2261  | 282  | 6   | 4  | 4   | 1.20 | 0.93 | 1.11 | 1.26 | 1.18 | 1.00 |
| X020165 | BCG_2262  | 307  | 10  | 5  | 5   | 0.90 | 0.83 | 0.85 | 0.92 | 1.01 | 1.00 |
| X020165 | BCG_2263  | 529  | 11  | 8  | 9   | 0.99 | 0.82 | 0.95 | 0.95 | 1.09 | 1.00 |
| X020165 | BCG_2264  | 462  | 11  | 7  | 7   | 0.92 | 0.87 | 0.97 | 0.96 | 1.11 | 1.00 |
| X020165 | BCG_2269  | 472  | 12  | 6  | 6   | 0.94 | 0.97 | 0.88 | 0.89 | 0.96 | 1.00 |
| X020165 | BCG_2276C | 412  | 8   | 6  | 7   | 0.99 | 0.83 | 0.98 | 0.99 | 1.13 | 1.00 |
| X020165 | BCG_2277  | 290  | 5   | 4  | 4   | 1.06 | 1.12 | 0.94 | 1.03 | 1.06 | 1.00 |
| X020165 | BCG_2295  | 548  | 13  | 7  | 7   | 0.96 | 0.81 | 0.92 | 1.00 | 1.09 | 1.00 |
| X020165 | BCG_2299  | 283  | 8   | 3  | 3   | 1.37 | 1.25 | 1.29 | 1.22 | 1.07 | 1.00 |
| X020165 | BCG_2305  | 265  | 6   | 6  | 6   | 0.97 | 1.02 | 1.07 | 1.01 | 1.02 | 1.00 |
| X020165 | BCG_2310  | 337  | 9   | 6  | 6   | 1.14 | 1.08 | 1.02 | 1.15 | 1.10 | 1.00 |
| X020165 | BCG_2312  | 481  | 11  | 10 | 10  | 0.95 | 0.77 | 0.82 | 0.87 | 0.93 | 1.00 |
| X020165 | BCG_2314  | 853  | 18  | 12 | 12  | 1.01 | 0.95 | 1.02 | 0.98 | 1.09 | 1.00 |
| X020165 | BCG_2315C | 977  | 22  | 15 | 15  | 0.92 | 0.87 | 0.90 | 0.96 | 1.07 | 1.00 |
| X020165 | BCG_2335C | 142  | 3   | 2  | 2   | 1.04 | 0.74 | 0.89 | 0.95 | 1.05 | 1.00 |
| X020165 | BCG_2336C | 83   | 5   | 2  | 2   | 1.11 | 1.39 | 1.02 | 1.09 | 1.03 | 1.00 |

|         |           |      |    |    |    |      |      |      |      |      |      |
|---------|-----------|------|----|----|----|------|------|------|------|------|------|
| X020165 | BCG_2347C | 289  | 7  | 4  | 4  | 0.90 | 0.91 | 0.97 | 0.93 | 0.85 | 1.00 |
| X020165 | BCG_2356  | 493  | 11 | 7  | 7  | 0.96 | 0.86 | 0.81 | 0.92 | 0.99 | 1.00 |
| X020165 | BCG_2367C | 149  | 3  | 2  | 2  | 0.90 | 0.89 | 0.85 | 0.84 | 0.84 | 1.00 |
| X020165 | BCG_2368  | 672  | 15 | 11 | 11 | 1.12 | 1.38 | 1.14 | 1.07 | 1.01 | 1.00 |
| X020165 | BCG_2371C | 500  | 15 | 8  | 9  | 0.87 | 0.87 | 0.99 | 0.97 | 1.01 | 1.00 |
| X020165 | BCG_2372  | 73   | 2  | 2  | 2  | 1.39 | 1.21 | 1.01 | 1.75 | 1.09 | 1.00 |
| X020165 | BCG_2375C | 159  | 4  | 2  | 2  | 1.04 | 1.18 | 1.18 | 1.00 | 1.07 | 1.00 |
| X020165 | BCG_2377  | 729  | 14 | 11 | 11 | 0.96 | 0.86 | 0.95 | 0.94 | 0.94 | 1.00 |
| X020165 | BCG_2387C | 318  | 10 | 8  | 8  | 0.97 | 0.95 | 1.04 | 1.04 | 1.01 | 1.00 |
| X020165 | BCG_2388C | 145  | 4  | 2  | 2  | 1.06 | 0.86 | 0.95 | 1.21 | 0.95 | 1.00 |
| X020165 | BCG_2401  | 95   | 3  | 2  | 2  | 0.80 | 1.06 | 0.82 | 0.86 | 0.84 | 1.00 |
| X020165 | BCG_2405  | 739  | 21 | 14 | 14 | 0.94 | 0.80 | 0.90 | 0.88 | 1.12 | 1.00 |
| X020165 | BCG_2412C | 147  | 3  | 2  | 2  | 1.25 | 1.16 | 0.97 | 1.02 | 0.98 | 1.00 |
| X020165 | BCG_2415C | 156  | 3  | 2  | 2  | 0.87 | 0.90 | 0.88 | 0.97 | 0.83 | 1.00 |
| X020165 | BCG_2418  | 359  | 13 | 4  | 4  | 1.09 | 0.97 | 1.15 | 0.95 | 1.03 | 1.00 |
| X020165 | BCG_2420C | 255  | 11 | 2  | 2  | 0.95 | 1.62 | 0.88 | 1.01 | 1.16 | 1.00 |
| X020165 | BCG_2426C | 154  | 3  | 2  | 2  | 0.92 | 1.17 | 0.88 | 0.85 | 0.84 | 1.00 |
| X020165 | BCG_2428  | 253  | 9  | 5  | 5  | 1.08 | 1.02 | 1.12 | 1.02 | 0.94 | 1.00 |
| X020165 | BCG_2432C | 177  | 5  | 5  | 5  | 1.01 | 1.10 | 1.03 | 1.06 | 1.10 | 1.00 |
| X020165 | BCG_2433C | 81   | 3  | 2  | 2  | 1.31 | 1.10 | 1.31 | 1.33 | 1.20 | 1.00 |
| X020165 | BCG_2434C | 116  | 2  | 2  | 2  | 1.00 | 1.11 | 1.13 | 1.12 | 1.16 | 1.00 |
| X020165 | BCG_2436C | 152  | 3  | 2  | 2  | 1.13 | 1.05 | 1.25 | 1.16 | 1.04 | 1.00 |
| X020165 | BCG_2443C | 151  | 3  | 3  | 3  | 1.25 | 1.36 | 1.14 | 1.18 | 1.09 | 1.00 |
| X020165 | BCG_2444C | 458  | 11 | 8  | 8  | 1.03 | 0.92 | 1.09 | 0.99 | 1.16 | 1.00 |
| X020165 | BCG_2447  | 767  | 17 | 12 | 13 | 1.18 | 0.90 | 1.03 | 1.15 | 1.25 | 1.00 |
| X020165 | BCG_2448  | 143  | 5  | 2  | 3  | 0.93 | 0.83 | 0.86 | 0.89 | 1.01 | 1.00 |
| X020165 | BCG_2457C | 283  | 10 | 6  | 6  | 1.08 | 1.02 | 1.13 | 1.13 | 1.10 | 1.00 |
| X020165 | BCG_2460C | 69   | 3  | 2  | 2  | 1.05 | 0.98 | 1.08 | 1.15 | 1.08 | 1.00 |
| X020165 | BCG_2461C | 189  | 8  | 5  | 6  | 0.89 | 1.01 | 1.21 | 1.04 | 1.06 | 1.00 |
| X020165 | BCG_2462C | 289  | 8  | 4  | 6  | 0.93 | 0.90 | 1.08 | 1.00 | 0.99 | 1.00 |
| X020165 | BCG_2464C | 1259 | 33 | 19 | 19 | 0.82 | 1.20 | 0.95 | 0.98 | 0.97 | 1.00 |
| X020165 | BCG_2467C | 101  | 4  | 2  | 2  | 1.01 | 0.86 | 1.03 | 0.98 | 1.14 | 1.00 |
| X020165 | BCG_2468C | 447  | 14 | 7  | 7  | 0.95 | 1.29 | 0.84 | 0.99 | 1.07 | 1.00 |
| X020165 | BCG_2469C | 325  | 7  | 5  | 5  | 0.90 | 1.11 | 0.94 | 0.96 | 0.96 | 1.00 |
| X020165 | BCG_2473C | 184  | 3  | 3  | 3  | 1.05 | 0.88 | 0.99 | 1.07 | 1.11 | 1.00 |
| X020165 | BCG_2474C | 462  | 9  | 9  | 9  | 0.92 | 0.83 | 0.93 | 0.93 | 1.04 | 1.00 |
| X020165 | BCG_2475C | 347  | 9  | 7  | 7  | 0.89 | 0.90 | 0.96 | 1.02 | 1.01 | 1.00 |
| X020165 | BCG_2477C | 503  | 13 | 8  | 8  | 0.84 | 0.89 | 0.98 | 0.94 | 0.99 | 1.00 |
| X020165 | BCG_2480C | 248  | 11 | 5  | 6  | 1.12 | 0.94 | 0.99 | 1.02 | 1.13 | 1.00 |
| X020165 | BCG_2481C | 443  | 10 | 7  | 7  | 1.06 | 1.07 | 1.07 | 1.02 | 1.08 | 1.00 |

|         |           |      |     |    |    |      |      |      |      |      |      |
|---------|-----------|------|-----|----|----|------|------|------|------|------|------|
| X020165 | BCG_2482C | 887  | 19  | 10 | 11 | 1.10 | 0.98 | 1.03 | 1.13 | 1.16 | 1.00 |
| X020165 | BCG_2485C | 319  | 9   | 7  | 7  | 1.08 | 1.33 | 1.01 | 1.05 | 1.09 | 1.00 |
| X020165 | BCG_2487  | 749  | 18  | 10 | 10 | 0.92 | 0.89 | 0.87 | 0.97 | 1.13 | 1.00 |
| X020165 | BCG_2494C | 98   | 2   | 2  | 2  | 1.42 | 1.27 | 1.09 | 1.20 | 1.19 | 1.00 |
| X020165 | BCG_2495C | 169  | 5   | 3  | 3  | 0.97 | 0.99 | 0.98 | 1.09 | 1.15 | 1.00 |
| X020165 | BCG_2496C | 2776 | 66  | 50 | 50 | 0.87 | 1.14 | 0.97 | 0.96 | 1.08 | 1.00 |
| X020165 | BCG_2497C | 866  | 20  | 15 | 16 | 0.95 | 0.80 | 0.89 | 0.95 | 1.12 | 1.00 |
| X020165 | BCG_2500C | 343  | 15  | 6  | 6  | 1.01 | 1.20 | 0.92 | 0.92 | 1.00 | 1.00 |
| X020165 | BCG_2501C | 291  | 8   | 5  | 5  | 0.76 | 0.89 | 0.90 | 0.80 | 1.07 | 1.00 |
| X020165 | BCG_2515C | 407  | 10  | 5  | 5  | 0.94 | 0.94 | 1.12 | 1.03 | 1.03 | 1.00 |
| X020165 | BCG_2517C | 255  | 6   | 4  | 4  | 0.95 | 1.04 | 1.02 | 1.04 | 1.03 | 1.00 |
| X020165 | BCG_2518C | 271  | 5   | 4  | 4  | 1.05 | 1.04 | 1.17 | 1.12 | 1.15 | 1.00 |
| X020165 | BCG_2519C | 50   | 2   | 2  | 2  | 1.00 | 1.36 | 1.00 | 1.06 | 1.03 | 1.00 |
| X020165 | BCG_2521C | 1808 | 47  | 30 | 34 | 1.02 | 1.02 | 1.03 | 0.98 | 0.91 | 1.00 |
| X020165 | BCG_2522C | 1294 | 28  | 21 | 25 | 0.94 | 0.87 | 0.86 | 0.84 | 0.85 | 1.00 |
| X020165 | BCG_2529  | 357  | 5   | 3  | 3  | 0.90 | 0.84 | 0.98 | 0.98 | 1.08 | 1.00 |
| X020165 | BCG_2530C | 83   | 3   | 3  | 3  | 0.92 | 0.86 | 0.74 | 0.99 | 1.05 | 1.00 |
| X020165 | BCG_2541C | 112  | 8   | 4  | 5  | 1.00 | 0.90 | 0.97 | 0.94 | 0.95 | 1.00 |
| X020165 | BCG_2542  | 260  | 8   | 5  | 5  | 1.05 | 1.07 | 0.99 | 1.01 | 1.09 | 1.00 |
| X020165 | BCG_2545C | 4713 | 111 | 76 | 83 | 0.91 | 0.99 | 0.93 | 0.89 | 0.69 | 1.00 |
| X020165 | BCG_2550  | 170  | 4   | 2  | 2  | 0.86 | 0.78 | 0.91 | 0.93 | 1.00 | 1.00 |
| X020165 | BCG_2553C | 220  | 7   | 3  | 3  | 0.91 | 1.03 | 0.82 | 0.91 | 0.96 | 1.00 |
| X020165 | BCG_2556C | 166  | 6   | 5  | 5  | 1.11 | 1.20 | 1.00 | 1.02 | 1.08 | 1.00 |
| X020165 | BCG_2557C | 459  | 12  | 7  | 7  | 0.95 | 0.87 | 0.91 | 0.95 | 1.05 | 1.00 |
| X020165 | BCG_2558  | 242  | 6   | 5  | 5  | 0.87 | 1.07 | 1.01 | 1.11 | 1.05 | 1.00 |
| X020165 | BCG_2560C | 96   | 3   | 3  | 3  | 1.04 | 1.09 | 0.97 | 1.00 | 1.06 | 1.00 |
| X020165 | BCG_2562C | 334  | 8   | 4  | 4  | 0.97 | 1.10 | 0.97 | 1.09 | 0.96 | 1.00 |
| X020165 | BCG_2576C | 461  | 11  | 8  | 9  | 0.95 | 0.97 | 0.92 | 0.82 | 0.92 | 1.00 |
| X020165 | BCG_2578C | 1461 | 32  | 23 | 23 | 0.85 | 1.10 | 0.91 | 0.94 | 1.04 | 1.00 |
| X020165 | BCG_2585  | 615  | 13  | 9  | 9  | 0.88 | 1.15 | 0.90 | 0.92 | 0.96 | 1.00 |
| X020165 | BCG_2586  | 416  | 8   | 5  | 5  | 0.84 | 0.71 | 0.96 | 0.88 | 1.04 | 1.00 |
| X020165 | BCG_2587  | 175  | 5   | 3  | 3  | 0.90 | 1.01 | 0.84 | 0.96 | 1.03 | 1.00 |
| X020165 | BCG_2595C | 429  | 11  | 6  | 6  | 1.02 | 1.18 | 0.96 | 1.01 | 1.03 | 1.00 |
| X020165 | BCG_2597  | 284  | 8   | 3  | 3  | 1.05 | 1.02 | 1.10 | 0.93 | 0.96 | 1.00 |
| X020165 | BCG_2598  | 175  | 3   | 3  | 3  | 1.23 | 1.18 | 0.97 | 1.03 | 0.99 | 1.00 |
| X020165 | BCG_2602  | 276  | 8   | 5  | 5  | 1.28 | 1.29 | 1.09 | 1.81 | 1.18 | 1.00 |
| X020165 | BCG_2603C | 224  | 7   | 2  | 2  | 1.06 | 1.00 | 0.81 | 1.00 | 1.04 | 1.00 |
| X020165 | BCG_2604C | 103  | 5   | 3  | 3  | 1.16 | 0.98 | 1.07 | 1.09 | 1.11 | 1.00 |
| X020165 | BCG_2605  | 131  | 3   | 2  | 2  | 0.78 | 0.69 | 0.88 | 1.06 | 0.72 | 1.00 |
| X020165 | BCG_2607C | 571  | 9   | 8  | 8  | 0.86 | 0.89 | 1.03 | 0.98 | 1.20 | 1.00 |

|         |           |     |    |    |    |      |      |      |      |      |      |
|---------|-----------|-----|----|----|----|------|------|------|------|------|------|
| X020165 | BCG_2609C | 315 | 7  | 5  | 5  | 0.76 | 0.88 | 1.02 | 0.84 | 0.89 | 1.00 |
| X020165 | BCG_2610C | 375 | 9  | 6  | 6  | 0.84 | 1.00 | 1.03 | 0.97 | 1.01 | 1.00 |
| X020165 | BCG_2612  | 340 | 8  | 5  | 5  | 0.93 | 1.13 | 0.79 | 0.96 | 1.02 | 1.00 |
| X020165 | BCG_2616C | 355 | 7  | 7  | 7  | 1.13 | 1.06 | 0.99 | 1.06 | 1.13 | 1.00 |
| X020165 | BCG_2628C | 129 | 4  | 2  | 2  | 0.92 | 0.69 | 0.93 | 0.92 | 1.27 | 1.00 |
| X020165 | BCG_2630C | 296 | 7  | 6  | 6  | 1.01 | 0.90 | 0.98 | 1.60 | 1.01 | 1.00 |
| X020165 | BCG_2631C | 499 | 14 | 6  | 10 | 0.92 | 1.01 | 1.02 | 1.01 | 1.02 | 1.00 |
| X020165 | BCG_2632  | 146 | 4  | 3  | 3  | 0.95 | 0.99 | 0.92 | 1.04 | 1.02 | 1.00 |
| X020165 | BCG_2636C | 89  | 4  | 2  | 2  | 0.85 | 1.25 | 0.85 | 0.84 | 0.89 | 1.00 |
| X020165 | BCG_2644C | 89  | 2  | 2  | 2  | 0.97 | 0.90 | 0.83 | 1.01 | 1.00 | 1.00 |
| X020165 | BCG_2649  | 685 | 17 | 9  | 10 | 1.04 | 1.12 | 1.06 | 0.99 | 0.96 | 1.00 |
| X020165 | BCG_2650  | 441 | 11 | 7  | 8  | 1.08 | 0.89 | 0.94 | 0.95 | 1.01 | 1.00 |
| X020165 | BCG_2651C | 92  | 2  | 2  | 2  | 1.08 | 1.03 | 1.02 | 0.99 | 1.04 | 1.00 |
| X020165 | BCG_2653C | 191 | 3  | 3  | 3  | 1.15 | 0.89 | 0.97 | 1.08 | 1.13 | 1.00 |
| X020165 | BCG_2654C | 149 | 6  | 3  | 3  | 0.83 | 0.89 | 0.87 | 0.80 | 0.84 | 1.00 |
| X020165 | BCG_2656  | 218 | 4  | 3  | 3  | 1.24 | 0.92 | 1.02 | 1.09 | 1.20 | 1.00 |
| X020165 | BCG_2659C | 123 | 2  | 2  | 2  | 0.95 | 0.95 | 1.08 | 0.95 | 0.90 | 1.00 |
| X020165 | BCG_2668  | 339 | 6  | 4  | 4  | 0.98 | 0.83 | 0.89 | 1.03 | 1.09 | 1.00 |
| X020165 | BCG_2684  | 864 | 29 | 14 | 18 | 0.98 | 0.95 | 1.17 | 1.00 | 0.96 | 1.00 |
| X020165 | BCG_2685  | 129 | 5  | 3  | 3  | 1.00 | 1.39 | 1.11 | 1.02 | 1.06 | 1.00 |
| X020165 | BCG_2686  | 148 | 6  | 3  | 3  | 0.92 | 1.01 | 0.97 | 0.97 | 0.90 | 1.00 |
| X020165 | BCG_2689C | 318 | 9  | 5  | 5  | 0.91 | 0.82 | 0.93 | 0.91 | 1.05 | 1.00 |
| X020165 | BCG_2690C | 153 | 4  | 3  | 3  | 1.11 | 1.33 | 0.98 | 1.04 | 1.08 | 1.00 |
| X020165 | BCG_2692  | 248 | 4  | 4  | 4  | 0.93 | 0.88 | 1.01 | 1.20 | 1.05 | 1.00 |
| X020165 | BCG_2696  | 139 | 4  | 3  | 3  | 1.21 | 0.92 | 1.13 | 1.23 | 1.12 | 1.00 |
| X020165 | BCG_2702C | 202 | 5  | 2  | 2  | 0.89 | 1.03 | 0.93 | 1.03 | 0.99 | 1.00 |
| X020165 | BCG_2704  | 225 | 6  | 4  | 4  | 1.12 | 1.03 | 1.07 | 1.17 | 1.16 | 1.00 |
| X020165 | BCG_2709C | 224 | 6  | 3  | 3  | 1.48 | 1.73 | 0.93 | 1.05 | 1.25 | 1.00 |
| X020165 | BCG_2715  | 171 | 4  | 2  | 2  | 0.90 | 0.93 | 0.90 | 0.83 | 0.98 | 1.00 |
| X020165 | BCG_2716  | 932 | 19 | 13 | 14 | 0.86 | 0.89 | 0.88 | 0.90 | 1.03 | 1.00 |
| X020165 | BCG_2723  | 193 | 3  | 3  | 3  | 0.99 | 1.02 | 0.95 | 1.11 | 1.11 | 1.00 |
| X020165 | BCG_2724  | 548 | 10 | 8  | 8  | 1.23 | 1.09 | 1.11 | 1.01 | 1.13 | 1.00 |
| X020165 | BCG_2727  | 144 | 5  | 2  | 2  | 0.97 | 1.01 | 0.97 | 1.06 | 1.15 | 1.00 |
| X020165 | BCG_2731C | 213 | 5  | 3  | 3  | 1.03 | 1.17 | 1.18 | 1.08 | 1.16 | 1.00 |
| X020165 | BCG_2733  | 136 | 4  | 3  | 3  | 1.91 | 0.71 | 1.06 | 1.02 | 1.26 | 1.00 |
| X020165 | BCG_2734C | 428 | 7  | 5  | 5  | 1.74 | 0.89 | 0.86 | 1.03 | 0.87 | 1.00 |
| X020165 | BCG_2739C | 54  | 2  | 2  | 2  | 1.08 | 1.11 | 1.03 | 1.03 | 1.03 | 1.00 |
| X020165 | BCG_2744  | 213 | 6  | 4  | 4  | 0.94 | 1.33 | 1.09 | 1.14 | 0.96 | 1.00 |
| X020165 | BCG_2745C | 144 | 4  | 2  | 2  | 1.00 | 1.26 | 0.90 | 0.94 | 0.87 | 1.00 |
| X020165 | BCG_2750C | 447 | 8  | 3  | 3  | 0.91 | 1.17 | 1.05 | 1.01 | 1.04 | 1.00 |

|         |           |      |    |    |    |      |      |      |      |      |      |
|---------|-----------|------|----|----|----|------|------|------|------|------|------|
| X020165 | BCG_2759C | 262  | 5  | 4  | 4  | 0.91 | 1.08 | 1.14 | 1.01 | 0.94 | 1.00 |
| X020165 | BCG_2760C | 1241 | 33 | 17 | 25 | 0.95 | 1.03 | 1.19 | 1.08 | 1.02 | 1.00 |
| X020165 | BCG_2767  | 240  | 6  | 3  | 3  | 1.05 | 0.92 | 1.12 | 1.03 | 1.04 | 1.00 |
| X020165 | BCG_2768C | 502  | 12 | 7  | 7  | 1.13 | 1.17 | 1.17 | 1.17 | 1.02 | 1.00 |
| X020165 | BCG_2769C | 382  | 11 | 5  | 5  | 1.12 | 1.22 | 1.00 | 1.08 | 1.11 | 1.00 |
| X020165 | BCG_2770C | 69   | 2  | 2  | 2  | 0.84 | 0.90 | 0.82 | 0.85 | 0.98 | 1.00 |
| X020165 | BCG_2780C | 618  | 32 | 11 | 22 | 1.01 | 1.04 | 1.10 | 0.96 | 0.94 | 1.00 |
| X020165 | BCG_2782  | 383  | 14 | 8  | 10 | 1.08 | 1.13 | 1.16 | 1.08 | 1.09 | 1.00 |
| X020165 | BCG_2783C | 233  | 5  | 3  | 3  | 0.86 | 1.25 | 0.75 | 0.85 | 0.80 | 1.00 |
| X020165 | BCG_2790C | 262  | 6  | 4  | 4  | 0.83 | 0.84 | 0.83 | 0.86 | 1.03 | 1.00 |
| X020165 | BCG_2800C | 488  | 9  | 8  | 8  | 0.91 | 0.97 | 0.87 | 0.92 | 1.01 | 1.00 |
| X020165 | BCG_2801C | 1802 | 53 | 29 | 40 | 0.87 | 0.81 | 0.91 | 0.91 | 0.96 | 1.00 |
| X020165 | BCG_2803C | 209  | 10 | 4  | 5  | 1.10 | 0.92 | 1.08 | 1.04 | 1.01 | 1.00 |
| X020165 | BCG_2808C | 369  | 7  | 7  | 7  | 0.90 | 0.86 | 0.87 | 0.89 | 0.99 | 1.00 |
| X020165 | BCG_2811C | 301  | 7  | 4  | 4  | 0.86 | 1.02 | 0.94 | 1.15 | 0.95 | 1.00 |
| X020165 | BCG_2820C | 296  | 6  | 3  | 3  | 1.12 | 1.16 | 0.99 | 1.06 | 1.01 | 1.00 |
| X020165 | BCG_2851  | 363  | 6  | 3  | 3  | 0.96 | 0.96 | 1.13 | 1.03 | 1.12 | 1.00 |
| X020165 | BCG_2857C | 374  | 5  | 5  | 5  | 0.98 | 0.91 | 1.01 | 0.96 | 1.08 | 1.00 |
| X020165 | BCG_2858C | 192  | 5  | 3  | 3  | 0.85 | 0.86 | 0.96 | 1.11 | 1.03 | 1.00 |
| X020165 | BCG_2859C | 1209 | 29 | 21 | 22 | 0.89 | 1.30 | 0.80 | 0.92 | 1.34 | 1.00 |
| X020165 | BCG_2861C | 440  | 12 | 7  | 7  | 0.92 | 0.92 | 0.82 | 0.88 | 0.89 | 1.00 |
| X020165 | BCG_2862C | 476  | 9  | 8  | 8  | 0.98 | 0.84 | 0.96 | 0.86 | 1.17 | 1.00 |
| X020165 | BCG_2865C | 601  | 17 | 9  | 9  | 0.93 | 0.96 | 0.95 | 1.01 | 1.03 | 1.00 |
| X020165 | BCG_2867C | 60   | 2  | 2  | 2  | 1.06 | 0.99 | 0.81 | 0.92 | 0.97 | 1.00 |
| X020165 | BCG_2872C | 134  | 5  | 3  | 3  | 1.21 | 1.07 | 1.04 | 1.04 | 1.05 | 1.00 |
| X020165 | BCG_2875  | 348  | 9  | 3  | 3  | 1.20 | 1.18 | 1.09 | 1.22 | 1.30 | 1.00 |
| X020165 | BCG_2879C | 164  | 3  | 3  | 3  | 1.08 | 0.97 | 0.95 | 1.10 | 1.05 | 1.00 |
| X020165 | BCG_2880C | 147  | 5  | 3  | 3  | 0.85 | 0.90 | 0.88 | 0.92 | 1.04 | 1.00 |
| X020165 | BCG_2882C | 1557 | 47 | 16 | 22 | 0.91 | 0.82 | 1.02 | 0.89 | 0.92 | 1.00 |
| X020165 | BCG_2883C | 214  | 5  | 5  | 5  | 1.08 | 0.88 | 0.85 | 0.99 | 1.43 | 1.00 |
| X020165 | BCG_2890C | 721  | 14 | 11 | 12 | 0.99 | 0.84 | 0.91 | 0.98 | 1.08 | 1.00 |
| X020165 | BCG_2901C | 164  | 6  | 3  | 3  | 1.22 | 1.20 | 1.01 | 1.05 | 1.09 | 1.00 |
| X020165 | BCG_2903C | 490  | 12 | 9  | 10 | 1.16 | 1.01 | 0.96 | 1.07 | 1.17 | 1.00 |
| X020165 | BCG_2904C | 385  | 7  | 5  | 5  | 1.01 | 1.04 | 0.98 | 0.96 | 1.05 | 1.00 |
| X020165 | BCG_2909C | 966  | 22 | 16 | 17 | 1.13 | 0.97 | 1.10 | 0.96 | 0.94 | 1.00 |
| X020165 | BCG_2910C | 910  | 19 | 13 | 15 | 0.90 | 0.72 | 0.87 | 0.92 | 1.07 | 1.00 |
| X020165 | BCG_2911C | 626  | 22 | 13 | 16 | 1.03 | 1.00 | 0.94 | 1.01 | 1.00 | 1.00 |
| X020165 | BCG_2916C | 208  | 5  | 3  | 3  | 1.02 | 1.00 | 0.91 | 0.99 | 1.06 | 1.00 |
| X020165 | BCG_2922C | 371  | 9  | 7  | 7  | 0.98 | 0.94 | 0.95 | 0.98 | 1.05 | 1.00 |
| X020165 | BCG_2924C | 243  | 8  | 4  | 4  | 0.86 | 1.37 | 0.87 | 1.10 | 1.02 | 1.00 |

|         |           |      |    |    |    |      |      |      |      |      |      |
|---------|-----------|------|----|----|----|------|------|------|------|------|------|
| X020165 | BCG_2925C | 423  | 14 | 8  | 8  | 0.77 | 0.79 | 0.91 | 0.88 | 1.00 | 1.00 |
| X020165 | BCG_2929C | 319  | 6  | 5  | 5  | 1.08 | 1.06 | 1.14 | 1.13 | 1.03 | 1.00 |
| X020165 | BCG_2930C | 235  | 8  | 5  | 6  | 0.94 | 0.94 | 1.06 | 1.05 | 1.01 | 1.00 |
| X020165 | BCG_2937C | 748  | 15 | 10 | 10 | 0.86 | 0.90 | 0.88 | 0.95 | 1.16 | 1.00 |
| X020165 | BCG_2942C | 688  | 15 | 11 | 12 | 0.90 | 0.98 | 0.97 | 0.88 | 0.95 | 1.00 |
| X020165 | BCG_2943C | 936  | 23 | 14 | 14 | 0.97 | 1.24 | 1.02 | 0.98 | 1.09 | 1.00 |
| X020165 | BCG_2944C | 153  | 3  | 2  | 2  | 0.91 | 0.78 | 1.04 | 0.93 | 1.09 | 1.00 |
| X020165 | BCG_2947C | 195  | 5  | 3  | 3  | 0.96 | 1.15 | 0.89 | 0.92 | 1.07 | 1.00 |
| X020165 | BCG_2949C | 462  | 14 | 9  | 9  | 0.97 | 1.15 | 1.06 | 1.06 | 1.00 | 1.00 |
| X020165 | BCG_2950  | 312  | 6  | 5  | 5  | 0.99 | 0.93 | 0.91 | 0.98 | 1.03 | 1.00 |
| X020165 | BCG_2952  | 617  | 14 | 8  | 8  | 1.00 | 0.98 | 0.93 | 1.06 | 1.05 | 1.00 |
| X020165 | BCG_2957  | 780  | 17 | 9  | 9  | 1.03 | 1.16 | 1.01 | 1.02 | 1.10 | 1.00 |
| X020165 | BCG_2958  | 281  | 8  | 5  | 5  | 1.10 | 1.15 | 0.98 | 1.01 | 1.01 | 1.00 |
| X020165 | BCG_2962C | 3340 | 83 | 49 | 58 | 0.91 | 1.21 | 0.96 | 1.01 | 1.08 | 1.00 |
| X020165 | BCG_2963  | 699  | 18 | 11 | 12 | 1.01 | 1.01 | 1.01 | 1.02 | 1.17 | 1.00 |
| X020165 | BCG_2964  | 487  | 10 | 8  | 8  | 0.83 | 1.17 | 0.95 | 1.07 | 0.89 | 1.00 |
| X020165 | BCG_2967C | 500  | 8  | 7  | 7  | 0.98 | 1.05 | 0.94 | 0.95 | 1.06 | 1.00 |
| X020165 | BCG_2968C | 1315 | 26 | 18 | 18 | 0.93 | 1.18 | 0.96 | 0.98 | 1.01 | 1.00 |
| X020165 | BCG_2969C | 704  | 15 | 8  | 8  | 0.84 | 0.87 | 1.00 | 1.00 | 0.95 | 1.00 |
| X020165 | BCG_2970C | 373  | 9  | 5  | 5  | 0.97 | 1.02 | 1.02 | 0.99 | 1.06 | 1.00 |
| X020165 | BCG_2971C | 376  | 9  | 6  | 6  | 1.03 | 1.19 | 0.95 | 1.02 | 1.15 | 1.00 |
| X020165 | BCG_2972C | 637  | 13 | 10 | 11 | 0.95 | 0.82 | 0.95 | 0.92 | 1.03 | 1.00 |
| X020165 | BCG_2973  | 231  | 6  | 4  | 4  | 0.94 | 0.75 | 0.73 | 0.85 | 1.04 | 1.00 |
| X020165 | BCG_2974  | 592  | 12 | 8  | 9  | 0.92 | 0.87 | 0.91 | 0.89 | 1.07 | 1.00 |
| X020165 | BCG_2976C | 191  | 5  | 3  | 3  | 1.22 | 0.92 | 1.00 | 0.96 | 1.15 | 1.00 |
| X020165 | BCG_2978  | 141  | 4  | 3  | 3  | 1.10 | 0.90 | 0.94 | 0.94 | 0.99 | 1.00 |
| X020165 | BCG_2980C | 274  | 8  | 5  | 5  | 0.85 | 0.86 | 0.87 | 0.89 | 0.91 | 1.00 |
| X020165 | BCG_2983C | 256  | 6  | 4  | 4  | 0.94 | 1.10 | 1.21 | 1.04 | 0.96 | 1.00 |
| X020165 | BCG_2984  | 83   | 2  | 2  | 2  | 1.00 | 1.16 | 1.21 | 1.28 | 1.16 | 1.00 |
| X020165 | BCG_2985  | 504  | 15 | 9  | 10 | 0.95 | 0.91 | 0.97 | 0.92 | 0.91 | 1.00 |
| X020165 | BCG_2988C | 574  | 12 | 8  | 8  | 0.84 | 1.10 | 0.91 | 1.01 | 1.10 | 1.00 |
| X020165 | BCG_2990C | 385  | 10 | 7  | 7  | 0.97 | 0.86 | 0.90 | 0.99 | 1.02 | 1.00 |
| X020165 | BCG_2991C | 597  | 12 | 9  | 9  | 0.93 | 0.99 | 0.84 | 0.90 | 0.92 | 1.00 |
| X020165 | BCG_2993  | 788  | 14 | 10 | 10 | 1.03 | 0.85 | 0.92 | 0.93 | 1.14 | 1.00 |
| X020165 | BCG_2997C | 70   | 3  | 2  | 2  | 1.18 | 1.27 | 0.94 | 1.10 | 1.19 | 1.00 |
| X020165 | BCG_3002C | 466  | 13 | 10 | 10 | 0.85 | 0.86 | 0.93 | 0.92 | 0.91 | 1.00 |
| X020165 | BCG_3003C | 147  | 3  | 3  | 3  | 0.97 | 1.06 | 0.85 | 1.17 | 1.02 | 1.00 |
| X020165 | BCG_3005  | 574  | 14 | 8  | 8  | 0.90 | 0.84 | 0.88 | 1.00 | 1.13 | 1.00 |
| X020165 | BCG_3007C | 247  | 6  | 5  | 5  | 0.71 | 0.85 | 0.83 | 0.82 | 0.90 | 1.00 |
| X020165 | BCG_3008C | 419  | 10 | 6  | 6  | 0.88 | 0.71 | 0.87 | 0.85 | 1.02 | 1.00 |

|         |           |      |    |    |    |      |      |      |      |      |      |
|---------|-----------|------|----|----|----|------|------|------|------|------|------|
| X020165 | BCG_3009C | 799  | 21 | 14 | 15 | 1.04 | 0.99 | 1.00 | 1.05 | 1.12 | 1.00 |
| X020165 | BCG_3010  | 789  | 17 | 13 | 13 | 1.16 | 1.00 | 0.98 | 0.88 | 1.04 | 1.00 |
| X020165 | BCG_3013C | 633  | 15 | 9  | 9  | 1.07 | 1.10 | 1.02 | 1.07 | 1.11 | 1.00 |
| X020165 | BCG_3014C | 222  | 5  | 3  | 3  | 1.14 | 1.31 | 0.97 | 1.04 | 1.07 | 1.00 |
| X020165 | BCG_3016C | 460  | 9  | 6  | 6  | 0.90 | 0.88 | 0.94 | 0.92 | 1.09 | 1.00 |
| X020165 | BCG_3017C | 1235 | 24 | 17 | 18 | 0.88 | 0.87 | 0.97 | 0.94 | 1.02 | 1.00 |
| X020165 | BCG_3023C | 534  | 17 | 9  | 10 | 0.75 | 0.70 | 0.73 | 0.72 | 0.91 | 1.00 |
| X020165 | BCG_3024C | 126  | 5  | 2  | 2  | 0.88 | 0.86 | 0.96 | 1.12 | 0.98 | 1.00 |
| X020165 | BCG_3025C | 124  | 5  | 3  | 4  | 1.04 | 1.70 | 1.07 | 1.10 | 1.11 | 1.00 |
| X020165 | BCG_3027C | 191  | 3  | 3  | 3  | 1.16 | 0.98 | 1.00 | 1.08 | 1.11 | 1.00 |
| X020165 | BCG_3031C | 708  | 18 | 12 | 13 | 0.98 | 1.00 | 0.93 | 0.99 | 1.06 | 1.00 |
| X020165 | BCG_3032C | 344  | 12 | 7  | 7  | 1.00 | 1.00 | 0.94 | 1.01 | 1.07 | 1.00 |
| X020165 | BCG_3033C | 496  | 9  | 6  | 6  | 0.95 | 0.91 | 0.94 | 1.02 | 1.06 | 1.00 |
| X020165 | BCG_3034C | 137  | 2  | 2  | 2  | 1.11 | 1.20 | 1.02 | 1.29 | 1.01 | 1.00 |
| X020165 | BCG_3037C | 88   | 3  | 2  | 2  | 0.97 | 1.27 | 0.98 | 0.96 | 0.91 | 1.00 |
| X020165 | BCG_3051C | 720  | 14 | 11 | 13 | 1.05 | 0.82 | 0.90 | 0.99 | 1.13 | 1.00 |
| X020165 | BCG_3052C | 546  | 16 | 9  | 9  | 0.95 | 0.78 | 0.84 | 0.92 | 1.08 | 1.00 |
| X020165 | BCG_3054  | 370  | 12 | 7  | 7  | 1.03 | 1.33 | 1.02 | 1.11 | 0.95 | 1.00 |
| X020165 | BCG_3056  | 167  | 6  | 2  | 2  | 1.14 | 1.52 | 1.34 | 1.17 | 1.09 | 1.00 |
| X020165 | BCG_3058C | 317  | 11 | 6  | 6  | 0.97 | 0.87 | 1.09 | 0.93 | 0.99 | 1.00 |
| X020165 | BCG_3059  | 80   | 2  | 2  | 2  | 0.98 | 1.17 | 0.82 | 0.85 | 0.92 | 1.00 |
| X020165 | BCG_3062C | 242  | 4  | 3  | 3  | 0.98 | 1.19 | 1.08 | 1.03 | 0.98 | 1.00 |
| X020165 | BCG_3063C | 149  | 3  | 3  | 3  | 0.84 | 0.83 | 0.95 | 0.95 | 1.07 | 1.00 |
| X020165 | BCG_3066C | 254  | 6  | 5  | 5  | 1.00 | 1.15 | 0.94 | 1.02 | 1.15 | 1.00 |
| X020165 | BCG_3069  | 621  | 19 | 11 | 17 | 0.93 | 0.76 | 0.88 | 0.94 | 1.06 | 1.00 |
| X020165 | BCG_3072C | 321  | 10 | 7  | 7  | 1.03 | 0.95 | 0.96 | 0.99 | 1.12 | 1.00 |
| X020165 | BCG_3073C | 117  | 5  | 2  | 2  | 1.09 | 1.03 | 0.98 | 1.03 | 1.05 | 1.00 |
| X020165 | BCG_3074C | 405  | 12 | 5  | 5  | 0.88 | 0.87 | 0.83 | 0.90 | 1.12 | 1.00 |
| X020165 | BCG_3075C | 815  | 20 | 14 | 14 | 0.93 | 0.88 | 0.90 | 0.98 | 1.16 | 1.00 |
| X020165 | BCG_3079C | 112  | 3  | 3  | 3  | 0.98 | 1.17 | 1.00 | 0.99 | 1.03 | 1.00 |
| X020165 | BCG_3082C | 156  | 4  | 3  | 3  | 0.91 | 1.46 | 1.00 | 0.98 | 0.95 | 1.00 |
| X020165 | BCG_3093C | 211  | 5  | 3  | 3  | 1.21 | 1.23 | 1.02 | 1.05 | 1.03 | 1.00 |
| X020165 | BCG_3100C | 373  | 8  | 5  | 5  | 1.24 | 0.92 | 1.07 | 1.10 | 1.12 | 1.00 |
| X020165 | BCG_3102  | 368  | 9  | 6  | 6  | 1.12 | 1.17 | 1.13 | 1.05 | 1.02 | 1.00 |
| X020165 | BCG_3115  | 402  | 8  | 6  | 6  | 0.93 | 1.16 | 1.21 | 1.08 | 0.99 | 1.00 |
| X020165 | BCG_3116  | 436  | 12 | 5  | 5  | 1.13 | 1.71 | 1.38 | 1.43 | 1.09 | 1.00 |
| X020165 | BCG_3118C | 390  | 8  | 7  | 7  | 1.10 | 1.24 | 0.98 | 0.93 | 0.85 | 1.00 |
| X020165 | BCG_3124C | 356  | 8  | 7  | 7  | 1.09 | 1.06 | 1.02 | 1.08 | 1.12 | 1.00 |
| X020165 | BCG_3126C | 264  | 10 | 7  | 7  | 0.91 | 1.22 | 0.89 | 0.99 | 0.89 | 1.00 |
| X020165 | BCG_3127C | 568  | 15 | 8  | 10 | 0.89 | 0.97 | 0.99 | 0.98 | 1.05 | 1.00 |

|         |           |      |    |    |    |      |      |      |      |      |      |
|---------|-----------|------|----|----|----|------|------|------|------|------|------|
| X020165 | BCG_3129C | 107  | 3  | 2  | 2  | 1.13 | 1.31 | 1.07 | 1.06 | 1.14 | 1.00 |
| X020165 | BCG_3130C | 405  | 11 | 5  | 5  | 0.99 | 0.89 | 0.90 | 1.03 | 1.10 | 1.00 |
| X020165 | BCG_3131  | 312  | 9  | 5  | 5  | 0.96 | 1.08 | 0.93 | 0.99 | 1.06 | 1.00 |
| X020165 | BCG_3141  | 188  | 4  | 2  | 2  | 1.14 | 1.19 | 1.00 | 1.02 | 0.85 | 1.00 |
| X020165 | BCG_3142  | 809  | 28 | 18 | 23 | 1.00 | 0.77 | 0.92 | 0.92 | 1.12 | 1.00 |
| X020165 | BCG_3153C | 297  | 11 | 6  | 6  | 0.94 | 1.22 | 1.06 | 0.92 | 1.00 | 1.00 |
| X020165 | BCG_3156C | 437  | 9  | 5  | 5  | 1.05 | 0.96 | 1.00 | 1.06 | 1.12 | 1.00 |
| X020165 | BCG_3157C | 145  | 5  | 3  | 3  | 0.99 | 1.30 | 0.87 | 1.13 | 1.02 | 1.00 |
| X020165 | BCG_3158  | 181  | 4  | 2  | 2  | 1.11 | 1.38 | 1.24 | 1.18 | 1.00 | 1.00 |
| X020165 | BCG_3160  | 240  | 6  | 4  | 4  | 0.94 | 1.20 | 0.85 | 0.95 | 1.00 | 1.00 |
| X020165 | BCG_3162  | 661  | 14 | 8  | 9  | 0.80 | 0.83 | 0.93 | 0.94 | 1.00 | 1.00 |
| X020165 | BCG_3163  | 842  | 21 | 13 | 15 | 0.85 | 0.81 | 0.94 | 0.97 | 1.03 | 1.00 |
| X020165 | BCG_3164  | 353  | 9  | 5  | 5  | 0.97 | 0.90 | 0.89 | 0.98 | 1.09 | 1.00 |
| X020165 | BCG_3166  | 118  | 3  | 3  | 3  | 1.03 | 0.89 | 1.07 | 1.07 | 1.04 | 1.00 |
| X020165 | BCG_3168  | 130  | 2  | 2  | 2  | 0.89 | 1.05 | 1.11 | 1.13 | 0.94 | 1.00 |
| X020165 | BCG_3169  | 267  | 8  | 5  | 6  | 1.30 | 1.05 | 1.09 | 1.09 | 1.15 | 1.00 |
| X020165 | BCG_3170  | 172  | 4  | 3  | 3  | 0.98 | 0.90 | 0.93 | 0.97 | 1.05 | 1.00 |
| X020165 | BCG_3171  | 358  | 9  | 7  | 7  | 0.89 | 0.78 | 0.91 | 0.92 | 0.97 | 1.00 |
| X020165 | BCG_3172  | 133  | 3  | 2  | 2  | 1.12 | 0.98 | 0.99 | 1.14 | 1.07 | 1.00 |
| X020165 | BCG_3173  | 420  | 14 | 7  | 7  | 0.87 | 0.87 | 0.88 | 0.91 | 1.02 | 1.00 |
| X020165 | BCG_3174  | 507  | 16 | 9  | 9  | 0.91 | 0.90 | 0.86 | 0.92 | 1.01 | 1.00 |
| X020165 | BCG_3176  | 184  | 4  | 3  | 3  | 0.94 | 1.00 | 1.03 | 0.97 | 1.07 | 1.00 |
| X020165 | BCG_3179  | 153  | 7  | 4  | 5  | 0.93 | 1.28 | 0.92 | 1.06 | 0.93 | 1.00 |
| X020165 | BCG_3181  | 190  | 5  | 3  | 3  | 0.82 | 1.20 | 0.90 | 0.87 | 0.79 | 1.00 |
| X020165 | BCG_3185C | 686  | 16 | 13 | 13 | 0.98 | 0.89 | 1.01 | 1.02 | 1.08 | 1.00 |
| X020165 | BCG_3197C | 66   | 2  | 2  | 2  | 1.07 | 1.07 | 1.26 | 1.17 | 1.20 | 1.00 |
| X020165 | BCG_3215C | 1220 | 34 | 20 | 20 | 0.83 | 1.39 | 0.91 | 0.92 | 0.96 | 1.00 |
| X020165 | BCG_3223  | 224  | 4  | 4  | 4  | 0.91 | 0.93 | 0.94 | 1.01 | 0.98 | 1.00 |
| X020165 | BCG_3225C | 439  | 11 | 6  | 6  | 0.94 | 0.90 | 0.99 | 0.88 | 0.97 | 1.00 |
| X020165 | BCG_3231C | 91   | 3  | 2  | 2  | 1.17 | 1.63 | 0.93 | 1.04 | 1.06 | 1.00 |
| X020165 | BCG_3232C | 385  | 9  | 7  | 7  | 1.05 | 1.06 | 0.96 | 1.05 | 1.05 | 1.00 |
| X020165 | BCG_3234  | 254  | 7  | 4  | 4  | 1.01 | 0.96 | 0.95 | 1.11 | 1.11 | 1.00 |
| X020165 | BCG_3235C | 170  | 3  | 3  | 3  | 1.03 | 0.94 | 0.86 | 1.11 | 1.04 | 1.00 |
| X020165 | BCG_3238  | 1022 | 25 | 17 | 17 | 0.90 | 1.01 | 0.86 | 0.98 | 0.89 | 1.00 |
| X020165 | BCG_3240C | 183  | 7  | 3  | 3  | 0.93 | 0.88 | 0.93 | 0.92 | 0.96 | 1.00 |
| X020165 | BCG_3251C | 527  | 13 | 6  | 6  | 1.16 | 0.94 | 1.07 | 1.11 | 1.16 | 1.00 |
| X020165 | BCG_3252  | 794  | 28 | 13 | 22 | 1.13 | 0.85 | 1.01 | 0.99 | 1.15 | 1.00 |
| X020165 | BCG_3255C | 525  | 10 | 9  | 9  | 1.06 | 1.13 | 0.96 | 0.97 | 0.95 | 1.00 |
| X020165 | BCG_3257  | 424  | 10 | 8  | 8  | 1.05 | 1.02 | 1.03 | 1.04 | 1.10 | 1.00 |
| X020165 | BCG_3259C | 334  | 10 | 3  | 3  | 0.98 | 1.05 | 1.09 | 1.01 | 0.98 | 1.00 |



|         |           |      |    |    |    |      |      |      |      |      |      |
|---------|-----------|------|----|----|----|------|------|------|------|------|------|
| X020165 | BCG_3263C | 103  | 5  | 2  | 2  | 0.80 | 1.15 | 0.88 | 0.93 | 0.98 | 1.00 |
| X020165 | BCG_3269C | 1423 | 35 | 22 | 23 | 0.87 | 1.27 | 0.94 | 0.97 | 1.26 | 1.00 |
| X020165 | BCG_3273C | 89   | 3  | 2  | 2  | 0.96 | 1.20 | 0.99 | 1.04 | 1.03 | 1.00 |
| X020165 | BCG_3275C | 429  | 10 | 5  | 7  | 0.95 | 0.74 | 0.88 | 0.91 | 1.06 | 1.00 |
| X020165 | BCG_3276C | 243  | 6  | 2  | 2  | 0.88 | 1.02 | 0.92 | 0.92 | 1.05 | 1.00 |
| X020165 | BCG_3277C | 1214 | 42 | 22 | 27 | 0.94 | 0.76 | 0.94 | 0.93 | 1.10 | 1.00 |
| X020165 | BCG_3284C | 207  | 6  | 4  | 4  | 1.16 | 1.04 | 1.04 | 1.05 | 1.15 | 1.00 |
| X020165 | BCG_3285C | 333  | 6  | 4  | 4  | 1.09 | 0.96 | 1.11 | 1.11 | 0.99 | 1.00 |
| X020165 | BCG_3291  | 262  | 8  | 4  | 4  | 0.96 | 1.16 | 1.00 | 1.00 | 1.04 | 1.00 |
| X020165 | BCG_3293C | 430  | 10 | 7  | 8  | 0.96 | 0.95 | 0.93 | 0.96 | 1.05 | 1.00 |
| X020165 | BCG_3294C | 211  | 4  | 3  | 3  | 0.69 | 0.88 | 0.74 | 0.75 | 0.90 | 1.00 |
| X020165 | BCG_3297  | 128  | 5  | 3  | 3  | 1.10 | 1.53 | 0.95 | 1.14 | 0.96 | 1.00 |
| X020165 | BCG_3298  | 260  | 5  | 3  | 3  | 1.35 | 1.19 | 1.02 | 1.08 | 1.05 | 1.00 |
| X020165 | BCG_3299  | 592  | 17 | 10 | 11 | 0.91 | 1.07 | 0.95 | 0.98 | 0.94 | 1.00 |
| X020165 | BCG_3302  | 499  | 11 | 8  | 8  | 0.85 | 0.97 | 1.05 | 0.91 | 0.97 | 1.00 |
| X020165 | BCG_3303C | 944  | 25 | 14 | 18 | 0.91 | 0.86 | 0.90 | 0.96 | 1.04 | 1.00 |
| X020165 | BCG_3305C | 1698 | 58 | 21 | 34 | 0.98 | 0.88 | 1.02 | 0.96 | 0.88 | 1.00 |
| X020165 | BCG_3309  | 1281 | 39 | 20 | 31 | 0.89 | 0.83 | 0.98 | 0.85 | 0.92 | 1.00 |
| X020165 | BCG_3310  | 99   | 3  | 2  | 2  | 1.31 | 1.20 | 1.36 | 1.48 | 1.18 | 1.00 |
| X020165 | BCG_3312  | 490  | 12 | 9  | 9  | 0.99 | 0.94 | 0.77 | 0.87 | 0.96 | 1.00 |
| X020165 | BCG_3314  | 1470 | 47 | 24 | 30 | 0.98 | 0.96 | 1.07 | 0.92 | 0.88 | 1.00 |
| X020165 | BCG_3315C | 117  | 3  | 3  | 3  | 0.90 | 1.42 | 0.97 | 0.93 | 0.94 | 1.00 |
| X020165 | BCG_3321  | 276  | 8  | 6  | 6  | 1.02 | 0.91 | 1.01 | 1.01 | 1.06 | 1.00 |
| X020165 | BCG_3322  | 510  | 12 | 10 | 10 | 1.02 | 1.17 | 0.93 | 1.05 | 1.04 | 1.00 |
| X020165 | BCG_3324  | 480  | 12 | 7  | 7  | 0.94 | 0.94 | 0.83 | 0.84 | 0.97 | 1.00 |
| X020165 | BCG_3325  | 447  | 15 | 6  | 6  | 0.98 | 1.12 | 0.95 | 1.08 | 1.00 | 1.00 |
| X020165 | BCG_3334  | 172  | 4  | 3  | 3  | 1.01 | 1.01 | 0.99 | 1.03 | 1.11 | 1.00 |
| X020165 | BCG_3335  | 243  | 6  | 3  | 3  | 0.90 | 0.88 | 0.83 | 0.85 | 1.02 | 1.00 |
| X020165 | BCG_3340C | 545  | 15 | 9  | 10 | 0.99 | 1.05 | 1.15 | 1.20 | 1.05 | 1.00 |
| X020165 | BCG_3349C | 155  | 4  | 3  | 3  | 1.07 | 1.37 | 1.16 | 1.20 | 1.18 | 1.00 |
| X020165 | BCG_3356C | 119  | 3  | 3  | 3  | 1.02 | 1.35 | 0.89 | 0.99 | 0.95 | 1.00 |
| X020165 | BCG_3364C | 185  | 6  | 2  | 2  | 1.32 | 1.37 | 1.11 | 1.11 | 1.01 | 1.00 |
| X020165 | BCG_3366C | 361  | 11 | 4  | 4  | 0.96 | 0.92 | 0.93 | 0.99 | 1.09 | 1.00 |
| X020165 | BCG_3367C | 916  | 22 | 14 | 16 | 0.98 | 0.96 | 0.95 | 1.05 | 1.05 | 1.00 |
| X020165 | BCG_3368C | 153  | 5  | 3  | 3  | 1.52 | 1.18 | 1.08 | 0.99 | 0.92 | 1.00 |
| X020165 | BCG_3370C | 170  | 5  | 2  | 2  | 1.96 | 0.88 | 1.01 | 1.33 | 1.23 | 1.00 |
| X020165 | BCG_3371C | 133  | 5  | 2  | 2  | 0.94 | 1.09 | 0.90 | 0.92 | 0.91 | 1.00 |
| X020165 | BCG_3376  | 237  | 6  | 4  | 4  | 1.13 | 0.94 | 1.11 | 1.05 | 1.05 | 1.00 |
| X020165 | BCG_3379C | 251  | 6  | 4  | 4  | 0.92 | 1.02 | 0.96 | 0.95 | 1.09 | 1.00 |
| X020165 | BCG_3383  | 101  | 4  | 3  | 3  | 1.09 | 1.03 | 1.06 | 1.04 | 1.00 | 1.00 |

|         |           |      |    |    |    |      |      |      |      |      |      |
|---------|-----------|------|----|----|----|------|------|------|------|------|------|
| X020165 | BCG_3384  | 506  | 15 | 9  | 9  | 0.93 | 1.07 | 0.88 | 0.97 | 1.06 | 1.00 |
| X020165 | BCG_3385  | 140  | 7  | 3  | 3  | 1.02 | 1.07 | 0.95 | 0.94 | 0.97 | 1.00 |
| X020165 | BCG_3408  | 171  | 3  | 3  | 3  | 0.95 | 1.04 | 0.94 | 0.95 | 0.88 | 1.00 |
| X020165 | BCG_3410  | 285  | 5  | 4  | 4  | 1.05 | 0.98 | 0.95 | 1.10 | 1.07 | 1.00 |
| X020165 | BCG_3412  | 147  | 4  | 2  | 2  | 1.05 | 1.16 | 1.09 | 1.07 | 1.12 | 1.00 |
| X020165 | BCG_3428C | 115  | 5  | 2  | 2  | 0.93 | 0.78 | 0.84 | 1.02 | 1.05 | 1.00 |
| X020165 | BCG_3440C | 89   | 3  | 2  | 2  | 0.94 | 0.83 | 0.93 | 1.02 | 1.17 | 1.00 |
| X020165 | BCG_3441  | 104  | 4  | 2  | 2  | 1.03 | 0.88 | 1.11 | 0.87 | 1.20 | 1.00 |
| X020165 | BCG_3445  | 189  | 6  | 3  | 3  | 0.99 | 0.78 | 0.86 | 0.90 | 0.99 | 1.00 |
| X020165 | BCG_3453C | 195  | 5  | 4  | 4  | 0.81 | 0.78 | 0.85 | 0.86 | 0.83 | 1.00 |
| X020165 | BCG_3458C | 788  | 16 | 11 | 12 | 1.04 | 0.90 | 1.05 | 1.04 | 1.18 | 1.00 |
| X020165 | BCG_3461C | 241  | 5  | 5  | 5  | 0.81 | 0.71 | 0.80 | 0.86 | 1.05 | 1.00 |
| X020165 | BCG_3466C | 344  | 10 | 9  | 9  | 0.94 | 1.11 | 0.90 | 0.93 | 1.08 | 1.00 |
| X020165 | BCG_3469  | 361  | 8  | 7  | 7  | 1.00 | 0.87 | 1.00 | 0.98 | 1.09 | 1.00 |
| X020165 | BCG_3470  | 234  | 7  | 3  | 3  | 1.26 | 1.06 | 1.00 | 1.10 | 1.18 | 1.00 |
| X020165 | BCG_3471  | 555  | 14 | 9  | 9  | 0.93 | 1.03 | 0.93 | 1.08 | 1.06 | 1.00 |
| X020165 | BCG_3474C | 80   | 2  | 2  | 2  | 1.10 | 0.76 | 0.92 | 0.92 | 0.88 | 1.00 |
| X020165 | BCG_3479C | 421  | 12 | 6  | 6  | 0.97 | 1.14 | 1.07 | 0.97 | 1.00 | 1.00 |
| X020165 | BCG_3480C | 324  | 9  | 4  | 4  | 0.94 | 0.90 | 1.06 | 1.01 | 1.09 | 1.00 |
| X020165 | BCG_3487C | 1660 | 52 | 22 | 35 | 0.89 | 0.78 | 0.89 | 0.92 | 1.06 | 1.00 |
| X020165 | BCG_3488C | 621  | 27 | 9  | 19 | 1.09 | 0.78 | 0.89 | 1.12 | 1.11 | 1.00 |
| X020165 | BCG_3502C | 430  | 11 | 6  | 6  | 1.07 | 0.97 | 1.05 | 1.10 | 1.09 | 1.00 |
| X020165 | BCG_3507C | 349  | 7  | 4  | 4  | 1.06 | 1.35 | 0.95 | 1.07 | 1.04 | 1.00 |
| X020165 | BCG_3508C | 413  | 17 | 9  | 12 | 0.96 | 0.94 | 1.01 | 1.00 | 0.98 | 1.00 |
| X020165 | BCG_3509C | 343  | 11 | 7  | 9  | 1.02 | 1.08 | 1.13 | 1.04 | 1.00 | 1.00 |
| X020165 | BCG_3520C | 105  | 4  | 3  | 3  | 1.18 | 0.89 | 1.12 | 1.05 | 1.04 | 1.00 |
| X020165 | BCG_3521C | 460  | 16 | 10 | 12 | 0.87 | 0.94 | 1.06 | 1.00 | 1.06 | 1.00 |
| X020165 | BCG_3522C | 1184 | 38 | 21 | 28 | 0.93 | 0.89 | 1.07 | 0.97 | 1.02 | 1.00 |
| X020165 | BCG_3523C | 700  | 24 | 10 | 14 | 0.96 | 0.95 | 1.04 | 0.98 | 1.01 | 1.00 |
| X020165 | BCG_3524C | 218  | 7  | 5  | 5  | 1.04 | 0.96 | 1.15 | 0.98 | 1.27 | 1.00 |
| X020165 | BCG_3525C | 568  | 22 | 9  | 11 | 0.76 | 0.76 | 0.92 | 0.80 | 0.94 | 1.00 |
| X020165 | BCG_3527C | 186  | 5  | 4  | 5  | 0.90 | 0.99 | 1.02 | 1.10 | 1.24 | 1.00 |
| X020165 | BCG_3529  | 268  | 6  | 4  | 4  | 1.05 | 0.92 | 0.95 | 1.02 | 1.12 | 1.00 |
| X020165 | BCG_3530  | 163  | 6  | 2  | 2  | 1.16 | 1.10 | 1.25 | 1.13 | 1.26 | 1.00 |
| X020165 | BCG_3549C | 190  | 5  | 2  | 2  | 1.19 | 1.16 | 1.02 | 1.08 | 1.12 | 1.00 |
| X020165 | BCG_3554  | 292  | 10 | 4  | 4  | 0.87 | 1.08 | 0.84 | 0.79 | 0.93 | 1.00 |
| X020165 | BCG_3556C | 184  | 4  | 2  | 2  | 0.87 | 0.92 | 0.94 | 0.90 | 1.00 | 1.00 |
| X020165 | BCG_3561C | 109  | 2  | 2  | 2  | 0.91 | 0.92 | 1.05 | 0.88 | 0.81 | 1.00 |
| X020165 | BCG_3573C | 631  | 11 | 9  | 9  | 1.07 | 1.00 | 0.98 | 1.05 | 1.07 | 1.00 |
| X020165 | BCG_3579  | 141  | 4  | 2  | 2  | 0.98 | 1.16 | 0.95 | 0.96 | 1.12 | 1.00 |

|         |           |      |    |    |    |      |      |      |      |      |      |
|---------|-----------|------|----|----|----|------|------|------|------|------|------|
| X020165 | BCG_3583  | 420  | 13 | 9  | 10 | 1.02 | 0.95 | 0.98 | 0.87 | 0.97 | 1.00 |
| X020165 | BCG_3584C | 376  | 9  | 5  | 6  | 0.86 | 0.78 | 0.88 | 0.92 | 1.05 | 1.00 |
| X020165 | BCG_3592C | 260  | 8  | 7  | 7  | 1.05 | 0.96 | 1.08 | 0.91 | 1.09 | 1.00 |
| X020165 | BCG_3598C | 213  | 4  | 3  | 3  | 0.95 | 0.85 | 0.87 | 0.97 | 1.08 | 1.00 |
| X020165 | BCG_3611  | 247  | 7  | 4  | 4  | 0.94 | 0.79 | 1.07 | 1.10 | 1.24 | 1.00 |
| X020165 | BCG_3620C | 207  | 6  | 4  | 4  | 1.07 | 1.28 | 1.07 | 0.98 | 1.08 | 1.00 |
| X020165 | BCG_3634C | 133  | 4  | 2  | 2  | 1.03 | 0.87 | 0.89 | 1.14 | 1.01 | 1.00 |
| X020165 | BCG_3635C | 599  | 13 | 9  | 9  | 0.99 | 0.89 | 0.92 | 0.92 | 1.01 | 1.00 |
| X020165 | BCG_3640C | 212  | 7  | 3  | 3  | 0.80 | 1.00 | 1.04 | 0.92 | 0.98 | 1.00 |
| X020165 | BCG_3645C | 398  | 9  | 6  | 6  | 1.01 | 1.03 | 0.98 | 1.04 | 1.03 | 1.00 |
| X020165 | BCG_3647C | 105  | 3  | 2  | 2  | 0.98 | 0.92 | 1.00 | 1.19 | 1.13 | 1.00 |
| X020165 | BCG_3648C | 421  | 10 | 7  | 7  | 1.17 | 0.90 | 0.93 | 1.00 | 1.14 | 1.00 |
| X020165 | BCG_3649  | 290  | 5  | 4  | 4  | 0.82 | 0.76 | 0.88 | 0.93 | 1.01 | 1.00 |
| X020165 | BCG_3652C | 188  | 4  | 3  | 3  | 0.80 | 0.73 | 0.86 | 0.84 | 0.97 | 1.00 |
| X020165 | BCG_3653C | 387  | 7  | 7  | 7  | 1.10 | 0.93 | 0.98 | 1.02 | 1.11 | 1.00 |
| X020165 | BCG_3657  | 154  | 2  | 2  | 2  | 1.00 | 0.80 | 0.88 | 0.95 | 1.08 | 1.00 |
| X020165 | BCG_3661C | 1674 | 40 | 26 | 27 | 0.90 | 0.98 | 0.84 | 0.92 | 1.04 | 1.00 |
| X020165 | BCG_3662C | 210  | 7  | 4  | 5  | 1.07 | 1.22 | 1.12 | 1.18 | 1.46 | 1.00 |
| X020165 | BCG_3663C | 407  | 11 | 5  | 5  | 0.93 | 0.94 | 0.92 | 0.95 | 1.07 | 1.00 |
| X020165 | BCG_3664C | 148  | 5  | 3  | 3  | 1.19 | 1.30 | 1.04 | 1.13 | 1.15 | 1.00 |
| X020165 | BCG_3674C | 636  | 13 | 8  | 8  | 0.81 | 0.99 | 0.94 | 0.92 | 0.96 | 1.00 |
| X020165 | BCG_3680C | 311  | 8  | 5  | 5  | 0.64 | 0.91 | 0.81 | 0.89 | 0.79 | 1.00 |
| X020165 | BCG_3682C | 172  | 3  | 3  | 3  | 1.00 | 0.91 | 0.95 | 1.02 | 1.02 | 1.00 |
| X020165 | BCG_3684C | 259  | 10 | 3  | 3  | 1.04 | 1.28 | 1.02 | 1.04 | 0.98 | 1.00 |
| X020165 | BCG_3685C | 188  | 4  | 3  | 3  | 1.03 | 0.96 | 1.09 | 1.16 | 1.02 | 1.00 |
| X020165 | BCG_3686  | 413  | 8  | 7  | 8  | 1.13 | 1.05 | 0.99 | 1.23 | 1.17 | 1.00 |
| X020165 | BCG_3692C | 328  | 6  | 5  | 5  | 1.03 | 1.05 | 1.01 | 0.95 | 1.00 | 1.00 |
| X020165 | BCG_3703  | 332  | 8  | 3  | 3  | 1.14 | 1.60 | 1.04 | 1.10 | 1.01 | 1.00 |
| X020165 | BCG_3704C | 1767 | 36 | 26 | 27 | 0.95 | 1.22 | 0.90 | 0.96 | 1.05 | 1.00 |
| X020165 | BCG_3706C | 238  | 9  | 5  | 7  | 1.41 | 1.07 | 1.13 | 1.39 | 1.20 | 1.00 |
| X020165 | BCG_3719  | 145  | 6  | 3  | 3  | 0.91 | 0.93 | 0.99 | 1.00 | 1.04 | 1.00 |
| X020165 | BCG_3725  | 326  | 8  | 5  | 5  | 0.95 | 0.84 | 0.92 | 0.99 | 1.10 | 1.00 |
| X020165 | BCG_3727  | 151  | 5  | 4  | 4  | 0.83 | 1.05 | 0.92 | 1.15 | 0.94 | 1.00 |
| X020165 | BCG_3729C | 339  | 6  | 5  | 5  | 0.90 | 0.90 | 0.91 | 0.92 | 0.97 | 1.00 |
| X020165 | BCG_3732C | 161  | 5  | 5  | 5  | 0.87 | 1.02 | 0.86 | 0.90 | 1.03 | 1.00 |
| X020165 | BCG_3734  | 410  | 11 | 5  | 5  | 1.24 | 1.08 | 1.09 | 1.01 | 1.13 | 1.00 |
| X020165 | BCG_3736C | 184  | 3  | 2  | 2  | 1.02 | 0.88 | 0.91 | 1.09 | 1.17 | 1.00 |
| X020165 | BCG_3738  | 215  | 6  | 2  | 2  | 0.97 | 0.90 | 0.86 | 0.99 | 0.91 | 1.00 |
| X020165 | BCG_3739  | 410  | 9  | 4  | 4  | 0.86 | 0.80 | 0.90 | 0.98 | 1.00 | 1.00 |
| X020165 | BCG_3741  | 371  | 12 | 4  | 4  | 0.89 | 0.93 | 0.83 | 0.98 | 0.95 | 1.00 |

|         |           |      |    |    |    |      |      |      |      |      |      |
|---------|-----------|------|----|----|----|------|------|------|------|------|------|
| X020165 | BCG_3742  | 177  | 6  | 4  | 4  | 1.17 | 1.09 | 0.98 | 0.96 | 0.99 | 1.00 |
| X020165 | BCG_3743  | 316  | 7  | 4  | 4  | 0.94 | 0.83 | 0.99 | 0.93 | 1.03 | 1.00 |
| X020165 | BCG_3747C | 191  | 3  | 3  | 3  | 1.03 | 0.80 | 0.86 | 0.88 | 1.07 | 1.00 |
| X020165 | BCG_3750  | 152  | 3  | 3  | 3  | 1.00 | 1.26 | 1.01 | 1.01 | 0.95 | 1.00 |
| X020165 | BCG_3751  | 435  | 9  | 4  | 4  | 0.96 | 0.98 | 0.96 | 0.91 | 1.07 | 1.00 |
| X020165 | BCG_3752  | 162  | 6  | 3  | 3  | 0.99 | 1.20 | 0.98 | 1.04 | 1.03 | 1.00 |
| X020165 | BCG_3755C | 404  | 8  | 6  | 6  | 0.99 | 1.13 | 0.94 | 1.05 | 1.06 | 1.00 |
| X020165 | BCG_3768C | 577  | 11 | 7  | 7  | 0.93 | 0.91 | 0.76 | 0.89 | 0.99 | 1.00 |
| X020165 | BCG_3769C | 588  | 14 | 10 | 10 | 0.96 | 0.96 | 1.01 | 1.02 | 1.06 | 1.00 |
| X020165 | BCG_3770  | 894  | 25 | 19 | 20 | 0.90 | 1.24 | 0.92 | 0.92 | 1.01 | 1.00 |
| X020165 | BCG_3776C | 176  | 4  | 3  | 3  | 1.15 | 0.86 | 0.93 | 1.14 | 1.13 | 1.00 |
| X020165 | BCG_3778C | 276  | 6  | 5  | 5  | 1.01 | 0.78 | 1.01 | 0.96 | 1.07 | 1.00 |
| X020165 | BCG_3779  | 242  | 5  | 2  | 2  | 0.80 | 0.67 | 0.86 | 0.81 | 1.18 | 1.00 |
| X020165 | BCG_3780  | 860  | 22 | 11 | 12 | 0.97 | 0.87 | 1.02 | 0.91 | 1.03 | 1.00 |
| X020165 | BCG_3782C | 694  | 18 | 14 | 14 | 0.94 | 0.82 | 0.84 | 0.89 | 1.06 | 1.00 |
| X020165 | BCG_3794C | 442  | 8  | 5  | 5  | 1.06 | 1.04 | 1.12 | 1.09 | 1.18 | 1.00 |
| X020165 | BCG_3806  | 363  | 10 | 4  | 6  | 1.06 | 1.02 | 1.03 | 1.21 | 1.24 | 1.00 |
| X020165 | BCG_3811C | 241  | 5  | 4  | 4  | 1.13 | 1.44 | 1.12 | 1.09 | 0.93 | 1.00 |
| X020165 | BCG_3820C | 256  | 6  | 4  | 4  | 1.09 | 0.97 | 1.02 | 1.17 | 1.00 | 1.00 |
| X020165 | BCG_3836  | 615  | 14 | 13 | 13 | 0.90 | 0.91 | 0.88 | 0.94 | 1.05 | 1.00 |
| X020165 | BCG_3837  | 400  | 16 | 8  | 8  | 1.06 | 0.99 | 0.96 | 1.04 | 0.98 | 1.00 |
| X020165 | BCG_3839  | 111  | 4  | 2  | 2  | 1.03 | 1.33 | 0.82 | 1.16 | 1.02 | 1.00 |
| X020165 | BCG_3840C | 291  | 6  | 4  | 4  | 0.89 | 0.70 | 0.81 | 0.92 | 0.92 | 1.00 |
| X020165 | BCG_3841  | 67   | 2  | 2  | 2  | 1.18 | 1.02 | 1.10 | 1.34 | 1.00 | 1.00 |
| X020165 | BCG_3842  | 277  | 6  | 6  | 6  | 1.13 | 1.02 | 0.99 | 1.22 | 1.10 | 1.00 |
| X020165 | BCG_3843  | 149  | 5  | 3  | 3  | 0.91 | 1.05 | 0.85 | 0.99 | 0.99 | 1.00 |
| X020165 | BCG_3844  | 409  | 9  | 7  | 7  | 0.91 | 0.83 | 0.97 | 0.95 | 0.96 | 1.00 |
| X020165 | BCG_3850  | 90   | 2  | 2  | 2  | 1.14 | 1.18 | 1.06 | 1.31 | 1.09 | 1.00 |
| X020165 | BCG_3852  | 194  | 6  | 3  | 3  | 0.91 | 0.92 | 0.83 | 0.95 | 0.98 | 1.00 |
| X020165 | BCG_3853  | 562  | 12 | 9  | 10 | 0.85 | 1.21 | 0.80 | 0.83 | 1.01 | 1.00 |
| X020165 | BCG_3855  | 168  | 5  | 3  | 3  | 0.90 | 1.12 | 0.84 | 0.91 | 0.83 | 1.00 |
| X020165 | BCG_3856  | 75   | 4  | 2  | 2  | 1.13 | 1.15 | 1.17 | 1.16 | 1.07 | 1.00 |
| X020165 | BCG_3857  | 277  | 8  | 6  | 6  | 0.96 | 1.34 | 0.91 | 0.99 | 0.92 | 1.00 |
| X020165 | BCG_3861C | 1517 | 39 | 19 | 28 | 0.89 | 0.84 | 0.98 | 0.88 | 0.91 | 1.00 |
| X020165 | BCG_3862C | 1318 | 38 | 27 | 29 | 0.84 | 1.29 | 0.89 | 0.97 | 1.02 | 1.00 |
| X020165 | BCG_3863C | 1154 | 24 | 19 | 19 | 0.91 | 0.93 | 0.91 | 0.93 | 1.04 | 1.00 |
| X020165 | BCG_3864C | 305  | 9  | 4  | 4  | 1.10 | 1.08 | 1.11 | 1.09 | 0.99 | 1.00 |
| X020165 | BCG_3866C | 264  | 6  | 4  | 5  | 1.06 | 1.04 | 1.12 | 1.06 | 1.29 | 1.00 |
| X020165 | BCG_3867C | 228  | 5  | 3  | 3  | 0.91 | 1.08 | 1.14 | 0.96 | 1.00 | 1.00 |
| X020165 | BCG_3870C | 484  | 13 | 9  | 9  | 0.86 | 1.00 | 0.91 | 0.96 | 0.98 | 1.00 |

|         |           |      |    |    |    |      |      |      |      |      |      |
|---------|-----------|------|----|----|----|------|------|------|------|------|------|
| X020165 | BCG_3871C | 219  | 8  | 5  | 5  | 0.85 | 0.87 | 0.84 | 0.90 | 1.00 | 1.00 |
| X020165 | BCG_3876C | 115  | 2  | 2  | 2  | 0.64 | 0.70 | 0.79 | 0.74 | 0.99 | 1.00 |
| X020165 | BCG_3878C | 386  | 9  | 6  | 6  | 1.09 | 0.95 | 1.26 | 1.04 | 1.06 | 1.00 |
| X020165 | BCG_3879  | 486  | 12 | 6  | 6  | 1.02 | 1.06 | 0.90 | 0.96 | 0.93 | 1.00 |
| X020165 | BCG_3880  | 523  | 14 | 9  | 9  | 1.05 | 1.05 | 0.88 | 1.02 | 1.07 | 1.00 |
| X020165 | BCG_3881  | 444  | 17 | 11 | 14 | 0.94 | 0.98 | 1.04 | 0.92 | 1.05 | 1.00 |
| X020165 | BCG_3897C | 278  | 6  | 2  | 2  | 0.89 | 1.45 | 0.90 | 0.89 | 0.96 | 1.00 |
| X020165 | BCG_3901C | 343  | 8  | 4  | 4  | 1.02 | 0.89 | 1.07 | 1.00 | 1.13 | 1.00 |
| X020165 | BCG_3904  | 375  | 9  | 7  | 8  | 0.96 | 0.96 | 1.02 | 1.00 | 1.04 | 1.00 |
| X020165 | BCG_3905C | 143  | 5  | 2  | 2  | 0.97 | 1.00 | 0.90 | 0.85 | 0.90 | 1.00 |
| X020165 | BCG_3906C | 128  | 7  | 2  | 2  | 1.03 | 1.26 | 0.99 | 1.00 | 0.90 | 1.00 |
| X020165 | BCG_3909  | 324  | 10 | 4  | 4  | 1.02 | 0.87 | 0.69 | 0.86 | 1.13 | 1.00 |
| X020165 | BCG_3912  | 300  | 10 | 7  | 8  | 1.11 | 1.14 | 1.00 | 1.10 | 1.13 | 1.00 |
| X020165 | BCG_3915  | 260  | 6  | 4  | 4  | 1.07 | 1.09 | 1.16 | 1.12 | 1.58 | 1.00 |
| X020165 | BCG_3917C | 45   | 2  | 2  | 2  | 0.93 | 1.01 | 0.89 | 0.98 | 0.97 | 1.00 |
| X020165 | BCG_3921C | 678  | 13 | 10 | 10 | 0.94 | 0.93 | 0.85 | 0.97 | 1.07 | 1.00 |
| X020165 | BCG_3922C | 1053 | 24 | 20 | 20 | 0.93 | 1.13 | 0.85 | 0.99 | 1.05 | 1.00 |
| X020165 | BCG_3926  | 188  | 7  | 4  | 4  | 1.08 | 1.08 | 0.98 | 1.06 | 1.11 | 1.00 |
| X020165 | BCG_3927  | 373  | 11 | 6  | 10 | 0.87 | 0.84 | 0.84 | 0.90 | 0.98 | 1.00 |
| X020165 | BCG_3928  | 218  | 5  | 4  | 4  | 1.11 | 1.01 | 1.11 | 1.03 | 1.03 | 1.00 |
| X020165 | BCG_3931  | 899  | 23 | 16 | 17 | 0.94 | 0.86 | 0.86 | 0.94 | 1.05 | 1.00 |
| X020165 | BCG_3935C | 210  | 4  | 3  | 3  | 1.03 | 0.89 | 0.97 | 1.07 | 1.15 | 1.00 |
| X020165 | BCG_3936C | 569  | 11 | 7  | 7  | 0.96 | 0.86 | 0.93 | 1.03 | 1.08 | 1.00 |
| X020165 | BCG_3964C | 250  | 6  | 3  | 3  | 0.95 | 1.10 | 0.93 | 1.06 | 1.02 | 1.00 |
| X020165 | BCG_3965  | 184  | 6  | 4  | 4  | 0.97 | 0.97 | 0.93 | 0.90 | 1.02 | 1.00 |
| X020165 | BCG_3967  | 179  | 4  | 4  | 4  | 1.00 | 1.32 | 1.09 | 1.12 | 1.05 | 1.00 |
| X020165 | BCG_3971  | 280  | 5  | 2  | 2  | 0.98 | 0.89 | 1.05 | 1.08 | 1.19 | 1.00 |
| X020165 | BCG_3972  | 312  | 11 | 6  | 8  | 1.20 | 0.90 | 1.02 | 1.28 | 1.17 | 1.00 |
| X020165 | BCG_3976C | 119  | 3  | 2  | 2  | 0.92 | 0.98 | 0.92 | 0.92 | 0.92 | 1.00 |
| X020165 | BCG_3978C | 578  | 9  | 8  | 8  | 1.07 | 0.96 | 1.13 | 1.24 | 1.03 | 1.00 |

| Hill | IC50         | pIC50       |
|------|--------------|-------------|
| 0.64 | 0.81         | 6.09        |
| 1.00 | 20.00        | 4.70        |
| 1.00 | $\geq 40.00$ | $\leq 4.40$ |
| 1.00 | $\geq 40.00$ | $\leq 4.40$ |
| 1.16 | $\geq 40.00$ | $\leq 4.40$ |
| NA   | $\geq 40.00$ | $\leq 4.40$ |
| 1.00 | $\geq 40.00$ | $\leq 4.40$ |
| NA   | $\geq 40.00$ | $\leq 4.40$ |
| 1.00 | $\geq 40.00$ | $\leq 4.40$ |
| 1.00 | $\geq 40.00$ | $\leq 4.40$ |
| 1.00 | $\geq 40.00$ | $\leq 4.40$ |
| 1.00 | $\geq 40.00$ | $\leq 4.40$ |
| 1.00 | $\geq 40.00$ | $\leq 4.40$ |
| 0.74 | $\geq 40.00$ | $\leq 4.40$ |
| NA   | $\geq 40.00$ | $\leq 4.40$ |
| 1.00 | $\geq 40.00$ | $\leq 4.40$ |
| 1.00 | $\geq 40.00$ | $\leq 4.40$ |
| 1.00 | $\geq 40.00$ | $\leq 4.40$ |
| NA   | $\geq 40.00$ | $\leq 4.40$ |
| 1.00 | $\geq 40.00$ | $\leq 4.40$ |
| 1.00 | $\geq 40.00$ | $\leq 4.40$ |
| NA   | $\geq 40.00$ | $\leq 4.40$ |
| 1.00 | $\geq 40.00$ | $\leq 4.40$ |
| NA   | $\geq 40.00$ | $\leq 4.40$ |
| 0.96 | $\geq 40.00$ | $\leq 4.40$ |
| NA   | $\geq 40.00$ | $\leq 4.40$ |
| 1.00 | $\geq 40.00$ | $\leq 4.40$ |
| 1.00 | $\geq 40.00$ | $\leq 4.40$ |
| 1.00 | $\geq 40.00$ | $\leq 4.40$ |

|      |              |             |
|------|--------------|-------------|
| 1.00 | $\geq 40.00$ | $\leq 4.40$ |
| 1.00 | $\geq 40.00$ | $\leq 4.40$ |
| NA   | $\geq 40.00$ | $\leq 4.40$ |
| 0.82 | $\geq 40.00$ | $\leq 4.40$ |
| 1.00 | $\geq 40.00$ | $\leq 4.40$ |
| 1.00 | $\geq 40.00$ | $\leq 4.40$ |
| NA   | $\geq 40.00$ | $\leq 4.40$ |
| 1.00 | $\geq 40.00$ | $\leq 4.40$ |
| NA   | $\geq 40.00$ | $\leq 4.40$ |
| NA   | $\geq 40.00$ | $\leq 4.40$ |
| NA   | $\geq 40.00$ | $\leq 4.40$ |
| NA   | $\geq 40.00$ | $\leq 4.40$ |
| 1.38 | $\geq 40.00$ | $\leq 4.40$ |
| NA   | $\geq 40.00$ | $\leq 4.40$ |
| NA   | $\geq 40.00$ | $\leq 4.40$ |
| NA   | $\geq 40.00$ | $\leq 4.40$ |
| NA   | $\geq 40.00$ | $\leq 4.40$ |
| 0.54 | $\geq 40.00$ | $\leq 4.40$ |
| NA   | $\geq 40.00$ | $\leq 4.40$ |
| 0.54 | $\geq 40.00$ | $\leq 4.40$ |
| 1.00 | $\geq 40.00$ | $\leq 4.40$ |
| 1.00 | $\geq 40.00$ | $\leq 4.40$ |
| 1.00 | $\geq 40.00$ | $\leq 4.40$ |
| NA   | $\geq 40.00$ | $\leq 4.40$ |
| 1.00 | $\geq 40.00$ | $\leq 4.40$ |
| NA   | $\geq 40.00$ | $\leq 4.40$ |
| 1.00 | $\geq 40.00$ | $\leq 4.40$ |
| 1.00 | $\geq 40.00$ | $\leq 4.40$ |
| 1.00 | $\geq 40.00$ | $\leq 4.40$ |
| 1.00 | $\geq 40.00$ | $\leq 4.40$ |
| 1.00 | $\geq 40.00$ | $\leq 4.40$ |
| 1.00 | $\geq 40.00$ | $\leq 4.40$ |
| 1.00 | $\geq 40.00$ | $\leq 4.40$ |
| 1.00 | $\geq 40.00$ | $\leq 4.40$ |
| NA   | $\geq 40.00$ | $\leq 4.40$ |
| 1.00 | $\geq 40.00$ | $\leq 4.40$ |
| 1.00 | $\geq 40.00$ | $\leq 4.40$ |
| NA   | $\geq 40.00$ | $\leq 4.40$ |
| 1.00 | $\geq 40.00$ | $\leq 4.40$ |
| 1.93 | $\geq 40.00$ | $\leq 4.40$ |
| NA   | $\geq 40.00$ | $\leq 4.40$ |
| NA   | $\geq 40.00$ | $\leq 4.40$ |

|      |              |             |
|------|--------------|-------------|
| NA   | $\geq 40.00$ | $\leq 4.40$ |
| 1.00 | $\geq 40.00$ | $\leq 4.40$ |
| 1.43 | $\geq 40.00$ | $\leq 4.40$ |
| NA   | $\geq 40.00$ | $\leq 4.40$ |
| NA   | $\geq 40.00$ | $\leq 4.40$ |
| 1.00 | $\geq 40.00$ | $\leq 4.40$ |
| 1.00 | $\geq 40.00$ | $\leq 4.40$ |
| 1.00 | $\geq 40.00$ | $\leq 4.40$ |
| 1.00 | $\geq 40.00$ | $\leq 4.40$ |
| 1.00 | $\geq 40.00$ | $\leq 4.40$ |
| 1.00 | $\geq 40.00$ | $\leq 4.40$ |
| NA   | $\geq 40.00$ | $\leq 4.40$ |
| 1.00 | $\geq 40.00$ | $\leq 4.40$ |
| 0.84 | $\geq 40.00$ | $\leq 4.40$ |
| 1.00 | $\geq 40.00$ | $\leq 4.40$ |
| 1.00 | $\geq 40.00$ | $\leq 4.40$ |
| 1.00 | $\geq 40.00$ | $\leq 4.40$ |
| 0.56 | $\geq 40.00$ | $\leq 4.40$ |
| 1.00 | $\geq 40.00$ | $\leq 4.40$ |
| 0.50 | $\geq 40.00$ | $\leq 4.40$ |
| NA   | $\geq 40.00$ | $\leq 4.40$ |
| NA   | $\geq 40.00$ | $\leq 4.40$ |
| NA   | $\geq 40.00$ | $\leq 4.40$ |
| 1.00 | $\geq 40.00$ | $\leq 4.40$ |
| 1.00 | $\geq 40.00$ | $\leq 4.40$ |
| NA   | $\geq 40.00$ | $\leq 4.40$ |
| NA   | $\geq 40.00$ | $\leq 4.40$ |
| NA   | $\geq 40.00$ | $\leq 4.40$ |
| NA   | $\geq 40.00$ | $\leq 4.40$ |
| 2.36 | $\geq 40.00$ | $\leq 4.40$ |
| NA   | $\geq 40.00$ | $\leq 4.40$ |
| 1.00 | $\geq 40.00$ | $\leq 4.40$ |
| NA   | $\geq 40.00$ | $\leq 4.40$ |
| NA   | $\geq 40.00$ | $\leq 4.40$ |
| 1.00 | $\geq 40.00$ | $\leq 4.40$ |
| 2.46 | $\geq 40.00$ | $\leq 4.40$ |
| NA   | $\geq 40.00$ | $\leq 4.40$ |
| NA   | $\geq 40.00$ | $\leq 4.40$ |
| NA   | $\geq 40.00$ | $\leq 4.40$ |
| 1.00 | $\geq 40.00$ | $\leq 4.40$ |
| 1.00 | $\geq 40.00$ | $\leq 4.40$ |



|      |              |             |
|------|--------------|-------------|
| NA   | $\geq 40.00$ | $\leq 4.40$ |
| 1.00 | $\geq 40.00$ | $\leq 4.40$ |
| NA   | $\geq 40.00$ | $\leq 4.40$ |
| 0.56 | $\geq 40.00$ | $\leq 4.40$ |
| NA   | $\geq 40.00$ | $\leq 4.40$ |
| 1.00 | $\geq 40.00$ | $\leq 4.40$ |
| 1.00 | $\geq 40.00$ | $\leq 4.40$ |
| 1.00 | $\geq 40.00$ | $\leq 4.40$ |
| 1.00 | $\geq 40.00$ | $\leq 4.40$ |
| 1.00 | $\geq 40.00$ | $\leq 4.40$ |
| 1.00 | $\geq 40.00$ | $\leq 4.40$ |
| 1.00 | $\geq 40.00$ | $\leq 4.40$ |
| NA   | $\geq 40.00$ | $\leq 4.40$ |
| 1.00 | $\geq 40.00$ | $\leq 4.40$ |
| NA   | $\geq 40.00$ | $\leq 4.40$ |
| NA   | $\geq 40.00$ | $\leq 4.40$ |
| 1.00 | $\geq 40.00$ | $\leq 4.40$ |
| 1.00 | $\geq 40.00$ | $\leq 4.40$ |
| 1.00 | $\geq 40.00$ | $\leq 4.40$ |
| NA   | $\geq 40.00$ | $\leq 4.40$ |
| NA   | $\geq 40.00$ | $\leq 4.40$ |
| NA   | $\geq 40.00$ | $\leq 4.40$ |
| NA   | $\geq 40.00$ | $\leq 4.40$ |
| NA   | $\geq 40.00$ | $\leq 4.40$ |
| 1.00 | $\geq 40.00$ | $\leq 4.40$ |
| 1.55 | $\geq 40.00$ | $\leq 4.40$ |
| NA   | $\geq 40.00$ | $\leq 4.40$ |
| 1.00 | $\geq 40.00$ | $\leq 4.40$ |
| 1.00 | $\geq 40.00$ | $\leq 4.40$ |
| 1.00 | $\geq 40.00$ | $\leq 4.40$ |
| 1.00 | $\geq 40.00$ | $\leq 4.40$ |
| NA   | $\geq 40.00$ | $\leq 4.40$ |
| 1.00 | $\geq 40.00$ | $\leq 4.40$ |
| 1.00 | $\geq 40.00$ | $\leq 4.40$ |
| 1.00 | $\geq 40.00$ | $\leq 4.40$ |
| 1.00 | $\geq 40.00$ | $\leq 4.40$ |
| 1.69 | $\geq 40.00$ | $\leq 4.40$ |
| 1.00 | $\geq 40.00$ | $\leq 4.40$ |
| 1.00 | $\geq 40.00$ | $\leq 4.40$ |
| 1.00 | $\geq 40.00$ | $\leq 4.40$ |
| 1.00 | $\geq 40.00$ | $\leq 4.40$ |

|      |         |        |
|------|---------|--------|
| 2.40 | ≥ 40.00 | ≤ 4.40 |
| 1.00 | ≥ 40.00 | ≤ 4.40 |
| 0.51 | ≥ 40.00 | ≤ 4.40 |
| 1.00 | ≥ 40.00 | ≤ 4.40 |
| NA   | ≥ 40.00 | ≤ 4.40 |
| 1.00 | ≥ 40.00 | ≤ 4.40 |
| 1.00 | ≥ 40.00 | ≤ 4.40 |
| 0.54 | ≥ 40.00 | ≤ 4.40 |
| NA   | ≥ 40.00 | ≤ 4.40 |
| 1.00 | ≥ 40.00 | ≤ 4.40 |
| 1.00 | ≥ 40.00 | ≤ 4.40 |
| NA   | ≥ 40.00 | ≤ 4.40 |
| 1.76 | ≥ 40.00 | ≤ 4.40 |
| 1.00 | ≥ 40.00 | ≤ 4.40 |
| 0.75 | ≥ 40.00 | ≤ 4.40 |
| 1.00 | ≥ 40.00 | ≤ 4.40 |
| 1.00 | ≥ 40.00 | ≤ 4.40 |
| NA   | ≥ 40.00 | ≤ 4.40 |
| NA   | ≥ 40.00 | ≤ 4.40 |
| NA   | ≥ 40.00 | ≤ 4.40 |
| NA   | ≥ 40.00 | ≤ 4.40 |
| NA   | ≥ 40.00 | ≤ 4.40 |
| 1.00 | ≥ 40.00 | ≤ 4.40 |
| 1.00 | ≥ 40.00 | ≤ 4.40 |
| NA   | ≥ 40.00 | ≤ 4.40 |
| NA   | ≥ 40.00 | ≤ 4.40 |
| NA   | ≥ 40.00 | ≤ 4.40 |
| 1.00 | ≥ 40.00 | ≤ 4.40 |
| NA   | ≥ 40.00 | ≤ 4.40 |
| 1.00 | ≥ 40.00 | ≤ 4.40 |
| NA   | ≥ 40.00 | ≤ 4.40 |
| 1.00 | ≥ 40.00 | ≤ 4.40 |
| 2.39 | ≥ 40.00 | ≤ 4.40 |
| NA   | ≥ 40.00 | ≤ 4.40 |
| 1.00 | ≥ 40.00 | ≤ 4.40 |
| NA   | ≥ 40.00 | ≤ 4.40 |
| 1.00 | ≥ 40.00 | ≤ 4.40 |
| 1.00 | ≥ 40.00 | ≤ 4.40 |
| 1.00 | ≥ 40.00 | ≤ 4.40 |
| 1.00 | ≥ 40.00 | ≤ 4.40 |

|      |         |        |
|------|---------|--------|
| 1.53 | ≥ 40.00 | ≤ 4.40 |
| 1.00 | ≥ 40.00 | ≤ 4.40 |
| 1.00 | ≥ 40.00 | ≤ 4.40 |
| 1.00 | ≥ 40.00 | ≤ 4.40 |
| 1.00 | ≥ 40.00 | ≤ 4.40 |
| 1.00 | ≥ 40.00 | ≤ 4.40 |
| NA   | ≥ 40.00 | ≤ 4.40 |
| 1.82 | ≥ 40.00 | ≤ 4.40 |
| NA   | ≥ 40.00 | ≤ 4.40 |
| NA   | ≥ 40.00 | ≤ 4.40 |
| NA   | ≥ 40.00 | ≤ 4.40 |
| 1.00 | ≥ 40.00 | ≤ 4.40 |
| 1.00 | ≥ 40.00 | ≤ 4.40 |
| NA   | ≥ 40.00 | ≤ 4.40 |
| 1.00 | ≥ 40.00 | ≤ 4.40 |
| 1.00 | ≥ 40.00 | ≤ 4.40 |
| 1.00 | ≥ 40.00 | ≤ 4.40 |
| 1.00 | ≥ 40.00 | ≤ 4.40 |
| 1.00 | ≥ 40.00 | ≤ 4.40 |
| 1.00 | ≥ 40.00 | ≤ 4.40 |
| 1.00 | ≥ 40.00 | ≤ 4.40 |
| 1.00 | ≥ 40.00 | ≤ 4.40 |
| 1.00 | ≥ 40.00 | ≤ 4.40 |
| 1.00 | ≥ 40.00 | ≤ 4.40 |
| 1.00 | ≥ 40.00 | ≤ 4.40 |
| 1.00 | ≥ 40.00 | ≤ 4.40 |
| 1.00 | ≥ 40.00 | ≤ 4.40 |
| 1.00 | ≥ 40.00 | ≤ 4.40 |
| 1.00 | ≥ 40.00 | ≤ 4.40 |
| 0.50 | ≥ 40.00 | ≤ 4.40 |
| NA   | ≥ 40.00 | ≤ 4.40 |
| 1.00 | ≥ 40.00 | ≤ 4.40 |
| 1.00 | ≥ 40.00 | ≤ 4.40 |
| 1.00 | ≥ 40.00 | ≤ 4.40 |
| 1.00 | ≥ 40.00 | ≤ 4.40 |
| 1.00 | ≥ 40.00 | ≤ 4.40 |
| 1.00 | ≥ 40.00 | ≤ 4.40 |
| 1.00 | ≥ 40.00 | ≤ 4.40 |
| NA   | ≥ 40.00 | ≤ 4.40 |
| 1.00 | ≥ 40.00 | ≤ 4.40 |
| 1.17 | ≥ 40.00 | ≤ 4.40 |
| 1.00 | ≥ 40.00 | ≤ 4.40 |
| 1.00 | ≥ 40.00 | ≤ 4.40 |
| 1.00 | ≥ 40.00 | ≤ 4.40 |
| 1.00 | ≥ 40.00 | ≤ 4.40 |
| 1.00 | ≥ 40.00 | ≤ 4.40 |
| 1.00 | ≥ 40.00 | ≤ 4.40 |
| 1.00 | ≥ 40.00 | ≤ 4.40 |
| 1.00 | ≥ 40.00 | ≤ 4.40 |
| NA   | ≥ 40.00 | ≤ 4.40 |

|      |              |             |
|------|--------------|-------------|
| 1.00 | $\geq 40.00$ | $\leq 4.40$ |
| 1.00 | $\geq 40.00$ | $\leq 4.40$ |
| 1.00 | $\geq 40.00$ | $\leq 4.40$ |
| 1.00 | $\geq 40.00$ | $\leq 4.40$ |
| NA   | $\geq 40.00$ | $\leq 4.40$ |
| 1.00 | $\geq 40.00$ | $\leq 4.40$ |
| 1.00 | $\geq 40.00$ | $\leq 4.40$ |
| 1.00 | $\geq 40.00$ | $\leq 4.40$ |
| 1.00 | $\geq 40.00$ | $\leq 4.40$ |
| 1.00 | $\geq 40.00$ | $\leq 4.40$ |
| 1.00 | $\geq 40.00$ | $\leq 4.40$ |
| 1.00 | $\geq 40.00$ | $\leq 4.40$ |
| 1.00 | $\geq 40.00$ | $\leq 4.40$ |
| 1.00 | $\geq 40.00$ | $\leq 4.40$ |
| 1.00 | $\geq 40.00$ | $\leq 4.40$ |
| 1.62 | $\geq 40.00$ | $\leq 4.40$ |
| 1.00 | $\geq 40.00$ | $\leq 4.40$ |
| NA   | $\geq 40.00$ | $\leq 4.40$ |
| 1.00 | $\geq 40.00$ | $\leq 4.40$ |
| 1.00 | $\geq 40.00$ | $\leq 4.40$ |
| NA   | $\geq 40.00$ | $\leq 4.40$ |
| NA   | $\geq 40.00$ | $\leq 4.40$ |
| 1.00 | $\geq 40.00$ | $\leq 4.40$ |
| NA   | $\geq 40.00$ | $\leq 4.40$ |
| 0.93 | $\geq 40.00$ | $\leq 4.40$ |
| NA   | $\geq 40.00$ | $\leq 4.40$ |
| 1.00 | $\geq 40.00$ | $\leq 4.40$ |
| 1.85 | $\geq 40.00$ | $\leq 4.40$ |
| 2.06 | $\geq 40.00$ | $\leq 4.40$ |
| 1.00 | $\geq 40.00$ | $\leq 4.40$ |
| 1.00 | $\geq 40.00$ | $\leq 4.40$ |
| NA   | $\geq 40.00$ | $\leq 4.40$ |
| 1.00 | $\geq 40.00$ | $\leq 4.40$ |
| 1.00 | $\geq 40.00$ | $\leq 4.40$ |
| NA   | $\geq 40.00$ | $\leq 4.40$ |
| 0.59 | $\geq 40.00$ | $\leq 4.40$ |
| 1.00 | $\geq 40.00$ | $\leq 4.40$ |
| 0.53 | $\geq 40.00$ | $\leq 4.40$ |
| NA   | $\geq 40.00$ | $\leq 4.40$ |
| 1.31 | $\geq 40.00$ | $\leq 4.40$ |
| 1.00 | $\geq 40.00$ | $\leq 4.40$ |
| 1.00 | $\geq 40.00$ | $\leq 4.40$ |

|      |         |        |
|------|---------|--------|
| 1.00 | ≥ 40.00 | ≤ 4.40 |
| 0.53 | ≥ 40.00 | ≤ 4.40 |
| NA   | ≥ 40.00 | ≤ 4.40 |
| 1.00 | ≥ 40.00 | ≤ 4.40 |
| 1.00 | ≥ 40.00 | ≤ 4.40 |
| NA   | ≥ 40.00 | ≤ 4.40 |
| 1.00 | ≥ 40.00 | ≤ 4.40 |
| 1.00 | ≥ 40.00 | ≤ 4.40 |
| 0.54 | ≥ 40.00 | ≤ 4.40 |
| 1.00 | ≥ 40.00 | ≤ 4.40 |
| 1.00 | ≥ 40.00 | ≤ 4.40 |
| NA   | ≥ 40.00 | ≤ 4.40 |
| NA   | ≥ 40.00 | ≤ 4.40 |
| NA   | ≥ 40.00 | ≤ 4.40 |
| NA   | ≥ 40.00 | ≤ 4.40 |
| 1.00 | ≥ 40.00 | ≤ 4.40 |
| 0.60 | ≥ 40.00 | ≤ 4.40 |
| NA   | ≥ 40.00 | ≤ 4.40 |
| 1.00 | ≥ 40.00 | ≤ 4.40 |
| NA   | ≥ 40.00 | ≤ 4.40 |
| 1.00 | ≥ 40.00 | ≤ 4.40 |
| 1.00 | ≥ 40.00 | ≤ 4.40 |
| NA   | ≥ 40.00 | ≤ 4.40 |
| 1.00 | ≥ 40.00 | ≤ 4.40 |
| 1.00 | ≥ 40.00 | ≤ 4.40 |
| 1.00 | ≥ 40.00 | ≤ 4.40 |
| NA   | ≥ 40.00 | ≤ 4.40 |
| NA   | ≥ 40.00 | ≤ 4.40 |
| 1.00 | ≥ 40.00 | ≤ 4.40 |
| 1.00 | ≥ 40.00 | ≤ 4.40 |
| 1.00 | ≥ 40.00 | ≤ 4.40 |
| 2.11 | ≥ 40.00 | ≤ 4.40 |
| 1.00 | ≥ 40.00 | ≤ 4.40 |
| NA   | ≥ 40.00 | ≤ 4.40 |
| NA   | ≥ 40.00 | ≤ 4.40 |
| NA   | ≥ 40.00 | ≤ 4.40 |
| 1.00 | ≥ 40.00 | ≤ 4.40 |
| 1.00 | ≥ 40.00 | ≤ 4.40 |
| NA   | ≥ 40.00 | ≤ 4.40 |
| 1.00 | ≥ 40.00 | ≤ 4.40 |
| NA   | ≥ 40.00 | ≤ 4.40 |

|      |              |             |
|------|--------------|-------------|
| NA   | $\geq 40.00$ | $\leq 4.40$ |
| 1.00 | $\geq 40.00$ | $\leq 4.40$ |
| NA   | $\geq 40.00$ | $\leq 4.40$ |
| 1.00 | $\geq 40.00$ | $\leq 4.40$ |
| NA   | $\geq 40.00$ | $\leq 4.40$ |
| 1.00 | $\geq 40.00$ | $\leq 4.40$ |
| 1.00 | $\geq 40.00$ | $\leq 4.40$ |
| NA   | $\geq 40.00$ | $\leq 4.40$ |
| 1.00 | $\geq 40.00$ | $\leq 4.40$ |
| 1.00 | $\geq 40.00$ | $\leq 4.40$ |
| 1.00 | $\geq 40.00$ | $\leq 4.40$ |
| 1.00 | $\geq 40.00$ | $\leq 4.40$ |
| 1.00 | $\geq 40.00$ | $\leq 4.40$ |
| 0.55 | $\geq 40.00$ | $\leq 4.40$ |
| NA   | $\geq 40.00$ | $\leq 4.40$ |
| NA   | $\geq 40.00$ | $\leq 4.40$ |
| 1.00 | $\geq 40.00$ | $\leq 4.40$ |
| 1.00 | $\geq 40.00$ | $\leq 4.40$ |
| 1.00 | $\geq 40.00$ | $\leq 4.40$ |
| NA   | $\geq 40.00$ | $\leq 4.40$ |
| NA   | $\geq 40.00$ | $\leq 4.40$ |
| NA   | $\geq 40.00$ | $\leq 4.40$ |
| NA   | $\geq 40.00$ | $\leq 4.40$ |
| NA   | $\geq 40.00$ | $\leq 4.40$ |
| 1.00 | $\geq 40.00$ | $\leq 4.40$ |
| 1.00 | $\geq 40.00$ | $\leq 4.40$ |
| 1.00 | $\geq 40.00$ | $\leq 4.40$ |
| NA   | $\geq 40.00$ | $\leq 4.40$ |
| 1.00 | $\geq 40.00$ | $\leq 4.40$ |
| 1.00 | $\geq 40.00$ | $\leq 4.40$ |
| NA   | $\geq 40.00$ | $\leq 4.40$ |
| NA   | $\geq 40.00$ | $\leq 4.40$ |
| NA   | $\geq 40.00$ | $\leq 4.40$ |
| 1.00 | $\geq 40.00$ | $\leq 4.40$ |
| 1.00 | $\geq 40.00$ | $\leq 4.40$ |
| 0.60 | $\geq 40.00$ | $\leq 4.40$ |
| NA   | $\geq 40.00$ | $\leq 4.40$ |
| NA   | $\geq 40.00$ | $\leq 4.40$ |
| 1.00 | $\geq 40.00$ | $\leq 4.40$ |
| 1.00 | $\geq 40.00$ | $\leq 4.40$ |

|      |              |             |
|------|--------------|-------------|
| 1.00 | $\geq 40.00$ | $\leq 4.40$ |
| NA   | $\geq 40.00$ | $\leq 4.40$ |
| 1.00 | $\geq 40.00$ | $\leq 4.40$ |
| 1.00 | $\geq 40.00$ | $\leq 4.40$ |
| NA   | $\geq 40.00$ | $\leq 4.40$ |
| NA   | $\geq 40.00$ | $\leq 4.40$ |
| NA   | $\geq 40.00$ | $\leq 4.40$ |
| 1.00 | $\geq 40.00$ | $\leq 4.40$ |
| 1.00 | $\geq 40.00$ | $\leq 4.40$ |
| NA   | $\geq 40.00$ | $\leq 4.40$ |
| 0.58 | $\geq 40.00$ | $\leq 4.40$ |
| 1.00 | $\geq 40.00$ | $\leq 4.40$ |
| 1.00 | $\geq 40.00$ | $\leq 4.40$ |
| 1.00 | $\geq 40.00$ | $\leq 4.40$ |
| NA   | $\geq 40.00$ | $\leq 4.40$ |
| 0.88 | $\geq 40.00$ | $\leq 4.40$ |
| 1.00 | $\geq 40.00$ | $\leq 4.40$ |
| 0.62 | $\geq 40.00$ | $\leq 4.40$ |
| 1.00 | $\geq 40.00$ | $\leq 4.40$ |
| NA   | $\geq 40.00$ | $\leq 4.40$ |
| 1.00 | $\geq 40.00$ | $\leq 4.40$ |
| NA   | $\geq 40.00$ | $\leq 4.40$ |
| 1.00 | $\geq 40.00$ | $\leq 4.40$ |
| 1.00 | $\geq 40.00$ | $\leq 4.40$ |
| 1.00 | $\geq 40.00$ | $\leq 4.40$ |
| 1.00 | $\geq 40.00$ | $\leq 4.40$ |
| NA   | $\geq 40.00$ | $\leq 4.40$ |
| 1.00 | $\geq 40.00$ | $\leq 4.40$ |
| 1.00 | $\geq 40.00$ | $\leq 4.40$ |
| 1.00 | $\geq 40.00$ | $\leq 4.40$ |
| 1.00 | $\geq 40.00$ | $\leq 4.40$ |
| NA   | $\geq 40.00$ | $\leq 4.40$ |
| 1.00 | $\geq 40.00$ | $\leq 4.40$ |
| 1.00 | $\geq 40.00$ | $\leq 4.40$ |
| NA   | $\geq 40.00$ | $\leq 4.40$ |
| 1.00 | $\geq 40.00$ | $\leq 4.40$ |
| NA   | $\geq 40.00$ | $\leq 4.40$ |
| NA   | $\geq 40.00$ | $\leq 4.40$ |
| 1.00 | $\geq 40.00$ | $\leq 4.40$ |
| NA   | $\geq 40.00$ | $\leq 4.40$ |





|      |              |             |
|------|--------------|-------------|
| NA   | $\geq 40.00$ | $\leq 4.40$ |
| NA   | $\geq 40.00$ | $\leq 4.40$ |
| 1.00 | $\geq 40.00$ | $\leq 4.40$ |
| 1.00 | $\geq 40.00$ | $\leq 4.40$ |
| 1.00 | $\geq 40.00$ | $\leq 4.40$ |
| 1.00 | $\geq 40.00$ | $\leq 4.40$ |
| 1.00 | $\geq 40.00$ | $\leq 4.40$ |
| 1.00 | $\geq 40.00$ | $\leq 4.40$ |
| NA   | $\geq 40.00$ | $\leq 4.40$ |
| NA   | $\geq 40.00$ | $\leq 4.40$ |
| 1.00 | $\geq 40.00$ | $\leq 4.40$ |
| 1.00 | $\geq 40.00$ | $\leq 4.40$ |
| 1.98 | $\geq 40.00$ | $\leq 4.40$ |
| 0.55 | $\geq 40.00$ | $\leq 4.40$ |
| 1.00 | $\geq 40.00$ | $\leq 4.40$ |
| 1.00 | $\geq 40.00$ | $\leq 4.40$ |
| 1.00 | $\geq 40.00$ | $\leq 4.40$ |
| 1.00 | $\geq 40.00$ | $\leq 4.40$ |
| 0.92 | $\geq 40.00$ | $\leq 4.40$ |
| 1.00 | $\geq 40.00$ | $\leq 4.40$ |
| 1.00 | $\geq 40.00$ | $\leq 4.40$ |
| 1.78 | $\geq 40.00$ | $\leq 4.40$ |
| NA   | $\geq 40.00$ | $\leq 4.40$ |
| 1.00 | $\geq 40.00$ | $\leq 4.40$ |
| 1.00 | $\geq 40.00$ | $\leq 4.40$ |
| 1.00 | $\geq 40.00$ | $\leq 4.40$ |
| 1.20 | $\geq 40.00$ | $\leq 4.40$ |
| NA   | $\geq 40.00$ | $\leq 4.40$ |
| NA   | $\geq 40.00$ | $\leq 4.40$ |
| 1.00 | $\geq 40.00$ | $\leq 4.40$ |
| 1.00 | $\geq 40.00$ | $\leq 4.40$ |
| 0.72 | $\geq 40.00$ | $\leq 4.40$ |
| NA   | $\geq 40.00$ | $\leq 4.40$ |
| 2.11 | $\geq 40.00$ | $\leq 4.40$ |
| 0.53 | $\geq 40.00$ | $\leq 4.40$ |
| 1.00 | $\geq 40.00$ | $\leq 4.40$ |
| 1.00 | $\geq 40.00$ | $\leq 4.40$ |
| NA   | $\geq 40.00$ | $\leq 4.40$ |
| NA   | $\geq 40.00$ | $\leq 4.40$ |
| NA   | $\geq 40.00$ | $\leq 4.40$ |
| 1.00 | $\geq 40.00$ | $\leq 4.40$ |
| 1.39 | $\geq 40.00$ | $\leq 4.40$ |

|      |              |             |
|------|--------------|-------------|
| 1.00 | $\geq 40.00$ | $\leq 4.40$ |
| 1.00 | $\geq 40.00$ | $\leq 4.40$ |
| 1.00 | $\geq 40.00$ | $\leq 4.40$ |
| 1.00 | $\geq 40.00$ | $\leq 4.40$ |
| 1.00 | $\geq 40.00$ | $\leq 4.40$ |
| 1.00 | $\geq 40.00$ | $\leq 4.40$ |
| 1.00 | $\geq 40.00$ | $\leq 4.40$ |
| NA   | $\geq 40.00$ | $\leq 4.40$ |
| NA   | $\geq 40.00$ | $\leq 4.40$ |
| 1.00 | $\geq 40.00$ | $\leq 4.40$ |
| 1.00 | $\geq 40.00$ | $\leq 4.40$ |
| NA   | $\geq 40.00$ | $\leq 4.40$ |
| 1.00 | $\geq 40.00$ | $\leq 4.40$ |
| 1.00 | $\geq 40.00$ | $\leq 4.40$ |
| 1.00 | $\geq 40.00$ | $\leq 4.40$ |
| NA   | $\geq 40.00$ | $\leq 4.40$ |
| 1.00 | $\geq 40.00$ | $\leq 4.40$ |
| NA   | $\geq 40.00$ | $\leq 4.40$ |
| 0.87 | $\geq 40.00$ | $\leq 4.40$ |
| 1.02 | $\geq 40.00$ | $\leq 4.40$ |
| 1.00 | $\geq 40.00$ | $\leq 4.40$ |
| NA   | $\geq 40.00$ | $\leq 4.40$ |
| 1.00 | $\geq 40.00$ | $\leq 4.40$ |
| 1.00 | $\geq 40.00$ | $\leq 4.40$ |
| 2.04 | $\geq 40.00$ | $\leq 4.40$ |
| NA   | $\geq 40.00$ | $\leq 4.40$ |
| 1.00 | $\geq 40.00$ | $\leq 4.40$ |
| 1.00 | $\geq 40.00$ | $\leq 4.40$ |
| NA   | $\geq 40.00$ | $\leq 4.40$ |
| 1.00 | $\geq 40.00$ | $\leq 4.40$ |
| NA   | $\geq 40.00$ | $\leq 4.40$ |
| NA   | $\geq 40.00$ | $\leq 4.40$ |
| NA   | $\geq 40.00$ | $\leq 4.40$ |
| 1.00 | $\geq 40.00$ | $\leq 4.40$ |
| NA   | $\geq 40.00$ | $\leq 4.40$ |
| NA   | $\geq 40.00$ | $\leq 4.40$ |
| 1.00 | $\geq 40.00$ | $\leq 4.40$ |
| NA   | $\geq 40.00$ | $\leq 4.40$ |
| NA   | $\geq 40.00$ | $\leq 4.40$ |
| 1.00 | $\geq 40.00$ | $\leq 4.40$ |
| 1.00 | $\geq 40.00$ | $\leq 4.40$ |

|      |              |             |
|------|--------------|-------------|
| 1.00 | $\geq 40.00$ | $\leq 4.40$ |
| 0.66 | $\geq 40.00$ | $\leq 4.40$ |
| 0.54 | $\geq 40.00$ | $\leq 4.40$ |
| NA   | $\geq 40.00$ | $\leq 4.40$ |
| NA   | $\geq 40.00$ | $\leq 4.40$ |
| 0.59 | $\geq 40.00$ | $\leq 4.40$ |
| 1.00 | $\geq 40.00$ | $\leq 4.40$ |
| 1.00 | $\geq 40.00$ | $\leq 4.40$ |
| 1.00 | $\geq 40.00$ | $\leq 4.40$ |
| 1.00 | $\geq 40.00$ | $\leq 4.40$ |
| NA   | $\geq 40.00$ | $\leq 4.40$ |
| NA   | $\geq 40.00$ | $\leq 4.40$ |
| NA   | $\geq 40.00$ | $\leq 4.40$ |
| 1.00 | $\geq 40.00$ | $\leq 4.40$ |
| NA   | $\geq 40.00$ | $\leq 4.40$ |
| NA   | $\geq 40.00$ | $\leq 4.40$ |
| 1.00 | $\geq 40.00$ | $\leq 4.40$ |
| 1.00 | $\geq 40.00$ | $\leq 4.40$ |
| 0.51 | $\geq 40.00$ | $\leq 4.40$ |
| NA   | $\geq 40.00$ | $\leq 4.40$ |
| 0.67 | $\geq 40.00$ | $\leq 4.40$ |
| 1.00 | $\geq 40.00$ | $\leq 4.40$ |
| 1.00 | $\geq 40.00$ | $\leq 4.40$ |
| NA   | $\geq 40.00$ | $\leq 4.40$ |
| 1.00 | $\geq 40.00$ | $\leq 4.40$ |
| NA   | $\geq 40.00$ | $\leq 4.40$ |
| NA   | $\geq 40.00$ | $\leq 4.40$ |
| NA   | $\geq 40.00$ | $\leq 4.40$ |
| 1.00 | $\geq 40.00$ | $\leq 4.40$ |
| NA   | $\geq 40.00$ | $\leq 4.40$ |
| NA   | $\geq 40.00$ | $\leq 4.40$ |
| NA   | $\geq 40.00$ | $\leq 4.40$ |
| NA   | $\geq 40.00$ | $\leq 4.40$ |
| 1.00 | $\geq 40.00$ | $\leq 4.40$ |
| 1.00 | $\geq 40.00$ | $\leq 4.40$ |
| NA   | $\geq 40.00$ | $\leq 4.40$ |
| 1.53 | $\geq 40.00$ | $\leq 4.40$ |
| 1.00 | $\geq 40.00$ | $\leq 4.40$ |

|      |              |             |
|------|--------------|-------------|
| NA   | $\geq 40.00$ | $\leq 4.40$ |
| 1.00 | $\geq 40.00$ | $\leq 4.40$ |
| 1.00 | $\geq 40.00$ | $\leq 4.40$ |
| NA   | $\geq 40.00$ | $\leq 4.40$ |
| NA   | $\geq 40.00$ | $\leq 4.40$ |
| 1.00 | $\geq 40.00$ | $\leq 4.40$ |
| 1.00 | $\geq 40.00$ | $\leq 4.40$ |
| NA   | $\geq 40.00$ | $\leq 4.40$ |
| 1.00 | $\geq 40.00$ | $\leq 4.40$ |
| 1.00 | $\geq 40.00$ | $\leq 4.40$ |
| NA   | $\geq 40.00$ | $\leq 4.40$ |
| 1.00 | $\geq 40.00$ | $\leq 4.40$ |
| NA   | $\geq 40.00$ | $\leq 4.40$ |
| 1.00 | $\geq 40.00$ | $\leq 4.40$ |
| 1.00 | $\geq 40.00$ | $\leq 4.40$ |
| NA   | $\geq 40.00$ | $\leq 4.40$ |
| NA   | $\geq 40.00$ | $\leq 4.40$ |
| NA   | $\geq 40.00$ | $\leq 4.40$ |
| 1.00 | $\geq 40.00$ | $\leq 4.40$ |
| 1.00 | $\geq 40.00$ | $\leq 4.40$ |
| NA   | $\geq 40.00$ | $\leq 4.40$ |
| NA   | $\geq 40.00$ | $\leq 4.40$ |
| NA   | $\geq 40.00$ | $\leq 4.40$ |
| NA   | $\geq 40.00$ | $\leq 4.40$ |
| NA   | $\geq 40.00$ | $\leq 4.40$ |
| NA   | $\geq 40.00$ | $\leq 4.40$ |
| NA   | $\geq 40.00$ | $\leq 4.40$ |
| 1.00 | $\geq 40.00$ | $\leq 4.40$ |
| NA   | $\geq 40.00$ | $\leq 4.40$ |
| 1.00 | $\geq 40.00$ | $\leq 4.40$ |
| 1.00 | $\geq 40.00$ | $\leq 4.40$ |
| 0.58 | $\geq 40.00$ | $\leq 4.40$ |
| NA   | $\geq 40.00$ | $\leq 4.40$ |
| 1.45 | $\geq 40.00$ | $\leq 4.40$ |
| NA   | $\geq 40.00$ | $\leq 4.40$ |
| 1.00 | $\geq 40.00$ | $\leq 4.40$ |
| NA   | $\geq 40.00$ | $\leq 4.40$ |
| 1.00 | $\geq 40.00$ | $\leq 4.40$ |
| NA   | $\geq 40.00$ | $\leq 4.40$ |
| 1.02 | $\geq 40.00$ | $\leq 4.40$ |

|      |              |             |
|------|--------------|-------------|
| 1.00 | $\geq 40.00$ | $\leq 4.40$ |
| 1.00 | $\geq 40.00$ | $\leq 4.40$ |
| 1.00 | $\geq 40.00$ | $\leq 4.40$ |
| 2.44 | $\geq 40.00$ | $\leq 4.40$ |
| 1.00 | $\geq 40.00$ | $\leq 4.40$ |
| 1.00 | $\geq 40.00$ | $\leq 4.40$ |
| NA   | $\geq 40.00$ | $\leq 4.40$ |
| 1.00 | $\geq 40.00$ | $\leq 4.40$ |
| NA   | $\geq 40.00$ | $\leq 4.40$ |
| 1.00 | $\geq 40.00$ | $\leq 4.40$ |
| 1.00 | $\geq 40.00$ | $\leq 4.40$ |
| 1.00 | $\geq 40.00$ | $\leq 4.40$ |
| NA   | $\geq 40.00$ | $\leq 4.40$ |
| NA   | $\geq 40.00$ | $\leq 4.40$ |
| 1.00 | $\geq 40.00$ | $\leq 4.40$ |
| NA   | $\geq 40.00$ | $\leq 4.40$ |
| 1.00 | $\geq 40.00$ | $\leq 4.40$ |
| 2.39 | $\geq 40.00$ | $\leq 4.40$ |
| NA   | $\geq 40.00$ | $\leq 4.40$ |
| 1.00 | $\geq 40.00$ | $\leq 4.40$ |
| NA   | $\geq 40.00$ | $\leq 4.40$ |
| 1.00 | $\geq 40.00$ | $\leq 4.40$ |
| NA   | $\geq 40.00$ | $\leq 4.40$ |
| NA   | $\geq 40.00$ | $\leq 4.40$ |
| 1.00 | $\geq 40.00$ | $\leq 4.40$ |
| 0.56 | $\geq 40.00$ | $\leq 4.40$ |
| 1.00 | $\geq 40.00$ | $\leq 4.40$ |
| 1.52 | $\geq 40.00$ | $\leq 4.40$ |
| 1.00 | $\geq 40.00$ | $\leq 4.40$ |
| 1.00 | $\geq 40.00$ | $\leq 4.40$ |
| NA   | $\geq 40.00$ | $\leq 4.40$ |
| 1.00 | $\geq 40.00$ | $\leq 4.40$ |
| NA   | $\geq 40.00$ | $\leq 4.40$ |
| NA   | $\geq 40.00$ | $\leq 4.40$ |
| NA   | $\geq 40.00$ | $\leq 4.40$ |
| 1.00 | $\geq 40.00$ | $\leq 4.40$ |
| NA   | $\geq 40.00$ | $\leq 4.40$ |
| 1.00 | $\geq 40.00$ | $\leq 4.40$ |
| 1.00 | $\geq 40.00$ | $\leq 4.40$ |
| NA   | $\geq 40.00$ | $\leq 4.40$ |

|      |         |        |
|------|---------|--------|
| 1.00 | ≥ 40.00 | ≤ 4.40 |
| 1.00 | ≥ 40.00 | ≤ 4.40 |
| 1.00 | ≥ 40.00 | ≤ 4.40 |
| NA   | ≥ 40.00 | ≤ 4.40 |
| 0.79 | ≥ 40.00 | ≤ 4.40 |
| NA   | ≥ 40.00 | ≤ 4.40 |
| NA   | ≥ 40.00 | ≤ 4.40 |
| 1.00 | ≥ 40.00 | ≤ 4.40 |
| 1.00 | ≥ 40.00 | ≤ 4.40 |
| NA   | ≥ 40.00 | ≤ 4.40 |
| NA   | ≥ 40.00 | ≤ 4.40 |
| 1.00 | ≥ 40.00 | ≤ 4.40 |
| NA   | ≥ 40.00 | ≤ 4.40 |
| 1.00 | ≥ 40.00 | ≤ 4.40 |
| 1.00 | ≥ 40.00 | ≤ 4.40 |
| 1.00 | ≥ 40.00 | ≤ 4.40 |
| 1.75 | ≥ 40.00 | ≤ 4.40 |
| 1.00 | ≥ 40.00 | ≤ 4.40 |
| NA   | ≥ 40.00 | ≤ 4.40 |
| 1.00 | ≥ 40.00 | ≤ 4.40 |
| NA   | ≥ 40.00 | ≤ 4.40 |
| NA   | ≥ 40.00 | ≤ 4.40 |
| NA   | ≥ 40.00 | ≤ 4.40 |
| NA   | ≥ 40.00 | ≤ 4.40 |
| NA   | ≥ 40.00 | ≤ 4.40 |
| 1.00 | ≥ 40.00 | ≤ 4.40 |
| 1.00 | ≥ 40.00 | ≤ 4.40 |
| 0.55 | ≥ 40.00 | ≤ 4.40 |
| NA   | ≥ 40.00 | ≤ 4.40 |
| NA   | ≥ 40.00 | ≤ 4.40 |
| NA   | ≥ 40.00 | ≤ 4.40 |
| 1.00 | ≥ 40.00 | ≤ 4.40 |
| NA   | ≥ 40.00 | ≤ 4.40 |
| 1.19 | ≥ 40.00 | ≤ 4.40 |
| 1.00 | ≥ 40.00 | ≤ 4.40 |
| 1.00 | ≥ 40.00 | ≤ 4.40 |
| 1.00 | ≥ 40.00 | ≤ 4.40 |
| 0.69 | ≥ 40.00 | ≤ 4.40 |
| 1.00 | ≥ 40.00 | ≤ 4.40 |
| 1.00 | ≥ 40.00 | ≤ 4.40 |
| 1.00 | ≥ 40.00 | ≤ 4.40 |
| NA   | ≥ 40.00 | ≤ 4.40 |



|      |         |        |
|------|---------|--------|
| 1.00 | ≥ 40.00 | ≤ 4.40 |
| 1.00 | ≥ 40.00 | ≤ 4.40 |
| NA   | ≥ 40.00 | ≤ 4.40 |
| NA   | ≥ 40.00 | ≤ 4.40 |
| 0.65 | ≥ 40.00 | ≤ 4.40 |
| NA   | ≥ 40.00 | ≤ 4.40 |
| 1.00 | ≥ 40.00 | ≤ 4.40 |
| 1.00 | ≥ 40.00 | ≤ 4.40 |
| 1.00 | ≥ 40.00 | ≤ 4.40 |
| 0.59 | ≥ 40.00 | ≤ 4.40 |
| NA   | ≥ 40.00 | ≤ 4.40 |
| 1.00 | ≥ 40.00 | ≤ 4.40 |
| NA   | ≥ 40.00 | ≤ 4.40 |
| NA   | ≥ 40.00 | ≤ 4.40 |
| 1.00 | ≥ 40.00 | ≤ 4.40 |
| NA   | ≥ 40.00 | ≤ 4.40 |
| 1.32 | ≥ 40.00 | ≤ 4.40 |
| 1.00 | ≥ 40.00 | ≤ 4.40 |
| NA   | ≥ 40.00 | ≤ 4.40 |
| 1.00 | ≥ 40.00 | ≤ 4.40 |
| NA   | ≥ 40.00 | ≤ 4.40 |
| 0.68 | ≥ 40.00 | ≤ 4.40 |
| 1.00 | ≥ 40.00 | ≤ 4.40 |
| NA   | ≥ 40.00 | ≤ 4.40 |
| 0.67 | ≥ 40.00 | ≤ 4.40 |
| 1.00 | ≥ 40.00 | ≤ 4.40 |
| NA   | ≥ 40.00 | ≤ 4.40 |
| NA   | ≥ 40.00 | ≤ 4.40 |
| 1.49 | ≥ 40.00 | ≤ 4.40 |
| 0.80 | ≥ 40.00 | ≤ 4.40 |
| 1.00 | ≥ 40.00 | ≤ 4.40 |
| NA   | ≥ 40.00 | ≤ 4.40 |
| NA   | ≥ 40.00 | ≤ 4.40 |
| NA   | ≥ 40.00 | ≤ 4.40 |
| 1.00 | ≥ 40.00 | ≤ 4.40 |
| 1.00 | ≥ 40.00 | ≤ 4.40 |
| NA   | ≥ 40.00 | ≤ 4.40 |
| 1.00 | ≥ 40.00 | ≤ 4.40 |
| 1.00 | ≥ 40.00 | ≤ 4.40 |
| NA   | ≥ 40.00 | ≤ 4.40 |



|      |              |             |
|------|--------------|-------------|
| NA   | $\geq 40.00$ | $\leq 4.40$ |
| 1.00 | $\geq 40.00$ | $\leq 4.40$ |
| 1.00 | $\geq 40.00$ | $\leq 4.40$ |
| NA   | $\geq 40.00$ | $\leq 4.40$ |
| NA   | $\geq 40.00$ | $\leq 4.40$ |
| 1.00 | $\geq 40.00$ | $\leq 4.40$ |
| NA   | $\geq 40.00$ | $\leq 4.40$ |
| NA   | $\geq 40.00$ | $\leq 4.40$ |
| 1.00 | $\geq 40.00$ | $\leq 4.40$ |
| 1.00 | $\geq 40.00$ | $\leq 4.40$ |
| 1.55 | $\geq 40.00$ | $\leq 4.40$ |
| 1.00 | $\geq 40.00$ | $\leq 4.40$ |
| NA   | $\geq 40.00$ | $\leq 4.40$ |
| 1.00 | $\geq 40.00$ | $\leq 4.40$ |
| NA   | $\geq 40.00$ | $\leq 4.40$ |
| NA   | $\geq 40.00$ | $\leq 4.40$ |
| NA   | $\geq 40.00$ | $\leq 4.40$ |
| 1.00 | $\geq 40.00$ | $\leq 4.40$ |
| 1.00 | $\geq 40.00$ | $\leq 4.40$ |
| 1.00 | $\geq 40.00$ | $\leq 4.40$ |
| 1.00 | $\geq 40.00$ | $\leq 4.40$ |
| 1.00 | $\geq 40.00$ | $\leq 4.40$ |
| NA   | $\geq 40.00$ | $\leq 4.40$ |
| 1.00 | $\geq 40.00$ | $\leq 4.40$ |
| NA   | $\geq 40.00$ | $\leq 4.40$ |
| NA   | $\geq 40.00$ | $\leq 4.40$ |
| NA   | $\geq 40.00$ | $\leq 4.40$ |
| NA   | $\geq 40.00$ | $\leq 4.40$ |
| 0.77 | $\geq 40.00$ | $\leq 4.40$ |
| 1.00 | $\geq 40.00$ | $\leq 4.40$ |
| NA   | $\geq 40.00$ | $\leq 4.40$ |
| 1.00 | $\geq 40.00$ | $\leq 4.40$ |
| NA   | $\geq 40.00$ | $\leq 4.40$ |
| NA   | $\geq 40.00$ | $\leq 4.40$ |
| 1.00 | $\geq 40.00$ | $\leq 4.40$ |
| NA   | $\geq 40.00$ | $\leq 4.40$ |
| 1.00 | $\geq 40.00$ | $\leq 4.40$ |
| NA   | $\geq 40.00$ | $\leq 4.40$ |
| 1.00 | $\geq 40.00$ | $\leq 4.40$ |
| 1.00 | $\geq 40.00$ | $\leq 4.40$ |
| NA   | $\geq 40.00$ | $\leq 4.40$ |

|      |              |             |
|------|--------------|-------------|
| 1.00 | $\geq 40.00$ | $\leq 4.40$ |
| NA   | $\geq 40.00$ | $\leq 4.40$ |
| 1.00 | $\geq 40.00$ | $\leq 4.40$ |
| 1.00 | $\geq 40.00$ | $\leq 4.40$ |
| 1.00 | $\geq 40.00$ | $\leq 4.40$ |
| 1.00 | $\geq 40.00$ | $\leq 4.40$ |
| 1.00 | $\geq 40.00$ | $\leq 4.40$ |
| 2.50 | $\geq 40.00$ | $\leq 4.40$ |
| 1.00 | $\geq 40.00$ | $\leq 4.40$ |
| 1.00 | $\geq 40.00$ | $\leq 4.40$ |
| 1.00 | $\geq 40.00$ | $\leq 4.40$ |
| NA   | $\geq 40.00$ | $\leq 4.40$ |
| NA   | $\geq 40.00$ | $\leq 4.40$ |
| NA   | $\geq 40.00$ | $\leq 4.40$ |
| 1.00 | $\geq 40.00$ | $\leq 4.40$ |
| NA   | $\geq 40.00$ | $\leq 4.40$ |
| NA   | $\geq 40.00$ | $\leq 4.40$ |
| NA   | $\geq 40.00$ | $\leq 4.40$ |
| 1.00 | $\geq 40.00$ | $\leq 4.40$ |
| 1.00 | $\geq 40.00$ | $\leq 4.40$ |
| NA   | $\geq 40.00$ | $\leq 4.40$ |
| 0.75 | $\geq 40.00$ | $\leq 4.40$ |
| 1.00 | $\geq 40.00$ | $\leq 4.40$ |
| 1.00 | $\geq 40.00$ | $\leq 4.40$ |
| 1.00 | $\geq 40.00$ | $\leq 4.40$ |
| 1.00 | $\geq 40.00$ | $\leq 4.40$ |
| 1.00 | $\geq 40.00$ | $\leq 4.40$ |
| 1.00 | $\geq 40.00$ | $\leq 4.40$ |
| NA   | $\geq 40.00$ | $\leq 4.40$ |
| NA   | $\geq 40.00$ | $\leq 4.40$ |
| 1.00 | $\geq 40.00$ | $\leq 4.40$ |
| 1.00 | $\geq 40.00$ | $\leq 4.40$ |
| 1.00 | $\geq 40.00$ | $\leq 4.40$ |
| 1.00 | $\geq 40.00$ | $\leq 4.40$ |
| 1.00 | $\geq 40.00$ | $\leq 4.40$ |
| NA   | $\geq 40.00$ | $\leq 4.40$ |
| 1.00 | $\geq 40.00$ | $\leq 4.40$ |
| 1.32 | $\geq 40.00$ | $\leq 4.40$ |
| 1.00 | $\geq 40.00$ | $\leq 4.40$ |
| 1.00 | $\geq 40.00$ | $\leq 4.40$ |
| 1.00 | $\geq 40.00$ | $\leq 4.40$ |

|      |              |             |
|------|--------------|-------------|
| 1.00 | $\geq 40.00$ | $\leq 4.40$ |
| NA   | $\geq 40.00$ | $\leq 4.40$ |
| NA   | $\geq 40.00$ | $\leq 4.40$ |
| NA   | $\geq 40.00$ | $\leq 4.40$ |
| NA   | $\geq 40.00$ | $\leq 4.40$ |
| 0.97 | $\geq 40.00$ | $\leq 4.40$ |
| 1.00 | $\geq 40.00$ | $\leq 4.40$ |
| NA   | $\geq 40.00$ | $\leq 4.40$ |
| NA   | $\geq 40.00$ | $\leq 4.40$ |
| NA   | $\geq 40.00$ | $\leq 4.40$ |
| 1.00 | $\geq 40.00$ | $\leq 4.40$ |
| 1.00 | $\geq 40.00$ | $\leq 4.40$ |
| 1.00 | $\geq 40.00$ | $\leq 4.40$ |
| 1.00 | $\geq 40.00$ | $\leq 4.40$ |
| 1.00 | $\geq 40.00$ | $\leq 4.40$ |
| 1.00 | $\geq 40.00$ | $\leq 4.40$ |
| 0.55 | $\geq 40.00$ | $\leq 4.40$ |
| NA   | $\geq 40.00$ | $\leq 4.40$ |
| NA   | $\geq 40.00$ | $\leq 4.40$ |
| 1.00 | $\geq 40.00$ | $\leq 4.40$ |
| 1.00 | $\geq 40.00$ | $\leq 4.40$ |
| 1.00 | $\geq 40.00$ | $\leq 4.40$ |
| 0.68 | $\geq 40.00$ | $\leq 4.40$ |
| 1.00 | $\geq 40.00$ | $\leq 4.40$ |
| 1.00 | $\geq 40.00$ | $\leq 4.40$ |
| NA   | $\geq 40.00$ | $\leq 4.40$ |
| NA   | $\geq 40.00$ | $\leq 4.40$ |
| NA   | $\geq 40.00$ | $\leq 4.40$ |
| NA   | $\geq 40.00$ | $\leq 4.40$ |
| 1.00 | $\geq 40.00$ | $\leq 4.40$ |
| 1.00 | $\geq 40.00$ | $\leq 4.40$ |
| NA   | $\geq 40.00$ | $\leq 4.40$ |
| NA   | $\geq 40.00$ | $\leq 4.40$ |
| NA   | $\geq 40.00$ | $\leq 4.40$ |
| NA   | $\geq 40.00$ | $\leq 4.40$ |
| NA   | $\geq 40.00$ | $\leq 4.40$ |
| NA   | $\geq 40.00$ | $\leq 4.40$ |
| 1.00 | $\geq 40.00$ | $\leq 4.40$ |
| 1.00 | $\geq 40.00$ | $\leq 4.40$ |

|      |              |             |
|------|--------------|-------------|
| NA   | $\geq 40.00$ | $\leq 4.40$ |
| 1.00 | $\geq 40.00$ | $\leq 4.40$ |
| NA   | $\geq 40.00$ | $\leq 4.40$ |
| NA   | $\geq 40.00$ | $\leq 4.40$ |
| 1.00 | $\geq 40.00$ | $\leq 4.40$ |
| 1.00 | $\geq 40.00$ | $\leq 4.40$ |
| NA   | $\geq 40.00$ | $\leq 4.40$ |
| 1.52 | $\geq 40.00$ | $\leq 4.40$ |
| NA   | $\geq 40.00$ | $\leq 4.40$ |
| 1.00 | $\geq 40.00$ | $\leq 4.40$ |
| 1.00 | $\geq 40.00$ | $\leq 4.40$ |
| 0.62 | $\geq 40.00$ | $\leq 4.40$ |
| NA   | $\geq 40.00$ | $\leq 4.40$ |
| 1.02 | $\geq 40.00$ | $\leq 4.40$ |
| 1.00 | $\geq 40.00$ | $\leq 4.40$ |
| NA   | $\geq 40.00$ | $\leq 4.40$ |
| 1.00 | $\geq 40.00$ | $\leq 4.40$ |
| 1.00 | $\geq 40.00$ | $\leq 4.40$ |
| NA   | $\geq 40.00$ | $\leq 4.40$ |
| 1.00 | $\geq 40.00$ | $\leq 4.40$ |
| 1.00 | $\geq 40.00$ | $\leq 4.40$ |
| 1.00 | $\geq 40.00$ | $\leq 4.40$ |
| 0.97 | $\geq 40.00$ | $\leq 4.40$ |
| 1.00 | $\geq 40.00$ | $\leq 4.40$ |
| 1.00 | $\geq 40.00$ | $\leq 4.40$ |
| NA   | $\geq 40.00$ | $\leq 4.40$ |
| NA   | $\geq 40.00$ | $\leq 4.40$ |
| 1.00 | $\geq 40.00$ | $\leq 4.40$ |
| 1.00 | $\geq 40.00$ | $\leq 4.40$ |
| 1.00 | $\geq 40.00$ | $\leq 4.40$ |
| NA   | $\geq 40.00$ | $\leq 4.40$ |
| NA   | $\geq 40.00$ | $\leq 4.40$ |
| 1.00 | $\geq 40.00$ | $\leq 4.40$ |
| 2.05 | $\geq 40.00$ | $\leq 4.40$ |
| 1.00 | $\geq 40.00$ | $\leq 4.40$ |
| NA   | $\geq 40.00$ | $\leq 4.40$ |
| 1.00 | $\geq 40.00$ | $\leq 4.40$ |
| NA   | $\geq 40.00$ | $\leq 4.40$ |
| NA   | $\geq 40.00$ | $\leq 4.40$ |
| 1.98 | $\geq 40.00$ | $\leq 4.40$ |

|      |              |             |
|------|--------------|-------------|
| NA   | $\geq 40.00$ | $\leq 4.40$ |
| 1.00 | $\geq 40.00$ | $\leq 4.40$ |
| 1.00 | $\geq 40.00$ | $\leq 4.40$ |
| 1.00 | $\geq 40.00$ | $\leq 4.40$ |
| 1.00 | $\geq 40.00$ | $\leq 4.40$ |
| 0.56 | $\geq 40.00$ | $\leq 4.40$ |
| NA   | $\geq 40.00$ | $\leq 4.40$ |
| NA   | $\geq 40.00$ | $\leq 4.40$ |
| 1.00 | $\geq 40.00$ | $\leq 4.40$ |
| 1.00 | $\geq 40.00$ | $\leq 4.40$ |
| 1.00 | $\geq 40.00$ | $\leq 4.40$ |
| 1.00 | $\geq 40.00$ | $\leq 4.40$ |
| NA   | $\geq 40.00$ | $\leq 4.40$ |
| 1.00 | $\geq 40.00$ | $\leq 4.40$ |
| 1.74 | $\geq 40.00$ | $\leq 4.40$ |
| 1.00 | $\geq 40.00$ | $\leq 4.40$ |
| 1.00 | $\geq 40.00$ | $\leq 4.40$ |
| 1.00 | $\geq 40.00$ | $\leq 4.40$ |
| NA   | $\geq 40.00$ | $\leq 4.40$ |
| 1.00 | $\geq 40.00$ | $\leq 4.40$ |
| NA   | $\geq 40.00$ | $\leq 4.40$ |
| 0.58 | $\geq 40.00$ | $\leq 4.40$ |
| 1.00 | $\geq 40.00$ | $\leq 4.40$ |
| 1.00 | $\geq 40.00$ | $\leq 4.40$ |
| NA   | $\geq 40.00$ | $\leq 4.40$ |
| 2.22 | $\geq 40.00$ | $\leq 4.40$ |
| 1.00 | $\geq 40.00$ | $\leq 4.40$ |
| 1.00 | $\geq 40.00$ | $\leq 4.40$ |
| NA   | $\geq 40.00$ | $\leq 4.40$ |
| NA   | $\geq 40.00$ | $\leq 4.40$ |
| 1.00 | $\geq 40.00$ | $\leq 4.40$ |
| NA   | $\geq 40.00$ | $\leq 4.40$ |
| NA   | $\geq 40.00$ | $\leq 4.40$ |
| 1.00 | $\geq 40.00$ | $\leq 4.40$ |
| NA   | $\geq 40.00$ | $\leq 4.40$ |
| 1.00 | $\geq 40.00$ | $\leq 4.40$ |
| 1.00 | $\geq 40.00$ | $\leq 4.40$ |
| NA   | $\geq 40.00$ | $\leq 4.40$ |
| 1.00 | $\geq 40.00$ | $\leq 4.40$ |
| NA   | $\geq 40.00$ | $\leq 4.40$ |

|      |         |        |
|------|---------|--------|
| 0.95 | ≥ 40.00 | ≤ 4.40 |
| 1.00 | ≥ 40.00 | ≤ 4.40 |
| 1.00 | ≥ 40.00 | ≤ 4.40 |
| 1.00 | ≥ 40.00 | ≤ 4.40 |
| NA   | ≥ 40.00 | ≤ 4.40 |
| 1.00 | ≥ 40.00 | ≤ 4.40 |
| 1.00 | ≥ 40.00 | ≤ 4.40 |
| 1.00 | ≥ 40.00 | ≤ 4.40 |
| 1.00 | ≥ 40.00 | ≤ 4.40 |
| 1.00 | ≥ 40.00 | ≤ 4.40 |
| 1.00 | ≥ 40.00 | ≤ 4.40 |
| 1.00 | ≥ 40.00 | ≤ 4.40 |
| 1.00 | ≥ 40.00 | ≤ 4.40 |
| 1.00 | ≥ 40.00 | ≤ 4.40 |
| 1.00 | ≥ 40.00 | ≤ 4.40 |
| 1.00 | ≥ 40.00 | ≤ 4.40 |
| NA   | ≥ 40.00 | ≤ 4.40 |
| NA   | ≥ 40.00 | ≤ 4.40 |
| NA   | ≥ 40.00 | ≤ 4.40 |
| NA   | ≥ 40.00 | ≤ 4.40 |
| 1.76 | ≥ 40.00 | ≤ 4.40 |
| 1.00 | ≥ 40.00 | ≤ 4.40 |
| 0.53 | ≥ 40.00 | ≤ 4.40 |
| 1.00 | ≥ 40.00 | ≤ 4.40 |
| 1.00 | ≥ 40.00 | ≤ 4.40 |
| 1.00 | ≥ 40.00 | ≤ 4.40 |
| 1.00 | ≥ 40.00 | ≤ 4.40 |
| 1.00 | ≥ 40.00 | ≤ 4.40 |
| NA   | ≥ 40.00 | ≤ 4.40 |
| NA   | ≥ 40.00 | ≤ 4.40 |
| 1.00 | ≥ 40.00 | ≤ 4.40 |
| 1.00 | ≥ 40.00 | ≤ 4.40 |
| NA   | ≥ 40.00 | ≤ 4.40 |
| NA   | ≥ 40.00 | ≤ 4.40 |
| 1.00 | ≥ 40.00 | ≤ 4.40 |
| 1.00 | ≥ 40.00 | ≤ 4.40 |
| NA   | ≥ 40.00 | ≤ 4.40 |
| NA   | ≥ 40.00 | ≤ 4.40 |
| 1.00 | ≥ 40.00 | ≤ 4.40 |

|      |              |             |
|------|--------------|-------------|
| NA   | $\geq 40.00$ | $\leq 4.40$ |
| 0.55 | $\geq 40.00$ | $\leq 4.40$ |
| 1.00 | $\geq 40.00$ | $\leq 4.40$ |
| 1.00 | $\geq 40.00$ | $\leq 4.40$ |
| 1.00 | $\geq 40.00$ | $\leq 4.40$ |
| 1.00 | $\geq 40.00$ | $\leq 4.40$ |
| NA   | $\geq 40.00$ | $\leq 4.40$ |
| NA   | $\geq 40.00$ | $\leq 4.40$ |
| 1.00 | $\geq 40.00$ | $\leq 4.40$ |
| 1.00 | $\geq 40.00$ | $\leq 4.40$ |
| 1.00 | $\geq 40.00$ | $\leq 4.40$ |
| NA   | $\geq 40.00$ | $\leq 4.40$ |
| 1.00 | $\geq 40.00$ | $\leq 4.40$ |
| 1.00 | $\geq 40.00$ | $\leq 4.40$ |
| 1.00 | $\geq 40.00$ | $\leq 4.40$ |
| 1.00 | $\geq 40.00$ | $\leq 4.40$ |
| 1.00 | $\geq 40.00$ | $\leq 4.40$ |
| 1.37 | $\geq 40.00$ | $\leq 4.40$ |
| 1.00 | $\geq 40.00$ | $\leq 4.40$ |
| 1.00 | $\geq 40.00$ | $\leq 4.40$ |
| NA   | $\geq 40.00$ | $\leq 4.40$ |
| 1.00 | $\geq 40.00$ | $\leq 4.40$ |
| 1.00 | $\geq 40.00$ | $\leq 4.40$ |
| 1.00 | $\geq 40.00$ | $\leq 4.40$ |
| NA   | $\geq 40.00$ | $\leq 4.40$ |
| NA   | $\geq 40.00$ | $\leq 4.40$ |
| 1.00 | $\geq 40.00$ | $\leq 4.40$ |
| NA   | $\geq 40.00$ | $\leq 4.40$ |
| NA   | $\geq 40.00$ | $\leq 4.40$ |
| 1.81 | $\geq 40.00$ | $\leq 4.40$ |
| NA   | $\geq 40.00$ | $\leq 4.40$ |
| 2.04 | $\geq 40.00$ | $\leq 4.40$ |
| 1.00 | $\geq 40.00$ | $\leq 4.40$ |
| NA   | $\geq 40.00$ | $\leq 4.40$ |
| 1.00 | $\geq 40.00$ | $\leq 4.40$ |
| 1.00 | $\geq 40.00$ | $\leq 4.40$ |
| NA   | $\geq 40.00$ | $\leq 4.40$ |
| 1.00 | $\geq 40.00$ | $\leq 4.40$ |
| 1.00 | $\geq 40.00$ | $\leq 4.40$ |
| 1.00 | $\geq 40.00$ | $\leq 4.40$ |
| 1.00 | $\geq 40.00$ | $\leq 4.40$ |

|      |              |             |
|------|--------------|-------------|
| NA   | $\geq 40.00$ | $\leq 4.40$ |
| 1.00 | $\geq 40.00$ | $\leq 4.40$ |
| 1.00 | $\geq 40.00$ | $\leq 4.40$ |
| 1.00 | $\geq 40.00$ | $\leq 4.40$ |
| NA   | $\geq 40.00$ | $\leq 4.40$ |
| 2.15 | $\geq 40.00$ | $\leq 4.40$ |
| NA   | $\geq 40.00$ | $\leq 4.40$ |
| 1.00 | $\geq 40.00$ | $\leq 4.40$ |
| NA   | $\geq 40.00$ | $\leq 4.40$ |
| NA   | $\geq 40.00$ | $\leq 4.40$ |
| NA   | $\geq 40.00$ | $\leq 4.40$ |
| 1.00 | $\geq 40.00$ | $\leq 4.40$ |
| 1.00 | $\geq 40.00$ | $\leq 4.40$ |
| 1.00 | $\geq 40.00$ | $\leq 4.40$ |
| 1.00 | $\geq 40.00$ | $\leq 4.40$ |
| NA   | $\geq 40.00$ | $\leq 4.40$ |
| 1.00 | $\geq 40.00$ | $\leq 4.40$ |
| NA   | $\geq 40.00$ | $\leq 4.40$ |
| NA   | $\geq 40.00$ | $\leq 4.40$ |
| 1.00 | $\geq 40.00$ | $\leq 4.40$ |
| NA   | $\geq 40.00$ | $\leq 4.40$ |
| NA   | $\geq 40.00$ | $\leq 4.40$ |
| 1.00 | $\geq 40.00$ | $\leq 4.40$ |
| 1.00 | $\geq 40.00$ | $\leq 4.40$ |
| 1.95 | $\geq 40.00$ | $\leq 4.40$ |
| 0.78 | $\geq 40.00$ | $\leq 4.40$ |
| 1.00 | $\geq 40.00$ | $\leq 4.40$ |
| NA   | $\geq 40.00$ | $\leq 4.40$ |
| 0.63 | $\geq 40.00$ | $\leq 4.40$ |
| NA   | $\geq 40.00$ | $\leq 4.40$ |
| 1.00 | $\geq 40.00$ | $\leq 4.40$ |
| NA   | $\geq 40.00$ | $\leq 4.40$ |
| 1.00 | $\geq 40.00$ | $\leq 4.40$ |
| 0.67 | $\geq 40.00$ | $\leq 4.40$ |
| 1.00 | $\geq 40.00$ | $\leq 4.40$ |
| NA   | $\geq 40.00$ | $\leq 4.40$ |
| NA   | $\geq 40.00$ | $\leq 4.40$ |
| 1.00 | $\geq 40.00$ | $\leq 4.40$ |
| NA   | $\geq 40.00$ | $\leq 4.40$ |
| 1.00 | $\geq 40.00$ | $\leq 4.40$ |





**Park et al., Supplementary Table S7**

**Proteins identified with Compound 5-matrix in lysates from Mycobacterium Bovis BCG cell extracts. Generation of IC50 values for test compound Compound 7**

Abbreviations: SSM; number of spectrum-to-sequence matches, UPM; unique peptide matches, NA; not available

| Experiment ID | Protein Name | Mascot Score | SSM | UPM | SSM used for quantification | abundance relative to vehicle |         |         |         |         |         |
|---------------|--------------|--------------|-----|-----|-----------------------------|-------------------------------|---------|---------|---------|---------|---------|
|               |              |              |     |     |                             | TMT126                        | TMT127L | TMT127H | TMT128L | TMT128H | TMT129L |
| X020167       | BCG_0005     | 326          | 9   | 3   | 3                           | 0.97                          | 0.97    | 1.07    | 1.06    | 0.99    | 1.00    |
| X020167       | BCG_0006     | 1163         | 30  | 18  | 19                          | 1.34                          | 0.99    | 1.06    | 1.06    | 1.11    | 1.00    |
| X020167       | BCG_0007     | 254          | 7   | 5   | 5                           | 0.93                          | 0.98    | 1.05    | 1.01    | 0.99    | 1.00    |
| X020167       | BCG_0008C    | 164          | 3   | 3   | 3                           | 0.85                          | 0.93    | 0.90    | 0.81    | 0.95    | 1.00    |
| X020167       | BCG_0009     | 321          | 12  | 5   | 7                           | 0.92                          | 0.96    | 1.06    | 1.00    | 1.08    | 1.00    |
| X020167       | BCG_0023C    | 443          | 8   | 6   | 6                           | 0.90                          | 0.92    | 0.95    | 0.97    | 0.98    | 1.00    |
| X020167       | BCG_0027C    | 251          | 10  | 5   | 6                           | 1.10                          | 0.75    | 0.89    | 0.73    | 1.01    | 1.00    |
| X020167       | BCG_0029C    | 106          | 4   | 4   | 4                           | 0.95                          | 1.14    | 0.89    | 1.05    | 1.01    | 1.00    |
| X020167       | BCG_0032     | 285          | 9   | 4   | 4                           | 1.03                          | 0.95    | 1.05    | 0.94    | 1.00    | 1.00    |
| X020167       | BCG_0044C    | 458          | 12  | 9   | 9                           | 0.97                          | 0.97    | 1.05    | 1.09    | 1.14    | 1.00    |
| X020167       | BCG_0045C    | 264          | 9   | 4   | 4                           | 0.91                          | 0.87    | 1.08    | 0.94    | 1.06    | 1.00    |
| X020167       | BCG_0048C    | 242          | 6   | 2   | 2                           | 0.96                          | 0.89    | 1.09    | 0.99    | 1.05    | 1.00    |
| X020167       | BCG_0049C    | 154          | 4   | 2   | 2                           | 0.96                          | 0.79    | 0.93    | 0.95    | 0.99    | 1.00    |
| X020167       | BCG_0050C    | 560          | 13  | 10  | 10                          | 0.94                          | 0.96    | 1.04    | 1.03    | 1.00    | 1.00    |
| X020167       | BCG_0072     | 169          | 7   | 2   | 2                           | 1.08                          | 0.86    | 1.01    | 0.94    | 1.11    | 1.00    |
| X020167       | BCG_0075C    | 194          | 9   | 4   | 4                           | 0.79                          | 0.97    | 0.85    | 0.94    | 0.86    | 1.00    |
| X020167       | BCG_0077C    | 642          | 17  | 11  | 13                          | 0.98                          | 0.89    | 1.00    | 0.98    | 1.08    | 1.00    |
| X020167       | BCG_0078C    | 210          | 5   | 4   | 4                           | 1.15                          | 1.45    | 1.15    | 1.19    | 0.95    | 1.00    |
| X020167       | BCG_0083     | 71           | 2   | 2   | 2                           | 1.26                          | 1.28    | 1.00    | 1.12    | 1.00    | 1.00    |
| X020167       | BCG_0084     | 314          | 9   | 6   | 8                           | 0.94                          | 1.17    | 1.05    | 1.04    | 1.03    | 1.00    |
| X020167       | BCG_0085     | 515          | 12  | 7   | 7                           | 0.90                          | 1.08    | 1.01    | 1.06    | 1.06    | 1.00    |
| X020167       | BCG_0086     | 301          | 15  | 8   | 10                          | 0.86                          | 0.81    | 1.09    | 0.81    | 0.91    | 1.00    |
| X020167       | BCG_0087     | 276          | 9   | 6   | 6                           | 0.78                          | 0.93    | 0.90    | 0.93    | 0.95    | 1.00    |
| X020167       | BCG_0091     | 169          | 6   | 3   | 3                           | 2.09                          | 0.88    | 0.99    | 0.91    | 1.06    | 1.00    |
| X020167       | BCG_0097C    | 387          | 13  | 8   | 8                           | 1.00                          | 0.99    | 1.06    | 1.05    | 1.05    | 1.00    |
| X020167       | BCG_0112     | 200          | 5   | 4   | 4                           | 1.05                          | 0.97    | 0.95    | 0.99    | 1.00    | 1.00    |
| X020167       | BCG_0121     | 412          | 12  | 8   | 9                           | 1.14                          | 1.03    | 0.97    | 0.90    | 1.05    | 1.00    |
| X020167       | BCG_0123     | 100          | 3   | 2   | 2                           | 1.37                          | 1.01    | 1.02    | 1.01    | 1.02    | 1.00    |

|         |           |      |    |    |    |      |      |      |      |      |      |
|---------|-----------|------|----|----|----|------|------|------|------|------|------|
| X020167 | BCG_0125  | 124  | 3  | 2  | 2  | 1.12 | 1.11 | 0.88 | 1.29 | 0.86 | 1.00 |
| X020167 | BCG_0155C | 243  | 8  | 4  | 5  | 0.81 | 1.01 | 0.93 | 1.08 | 0.82 | 1.00 |
| X020167 | BCG_0157  | 132  | 7  | 3  | 3  | 1.19 | 1.12 | 1.06 | 1.07 | 0.99 | 1.00 |
| X020167 | BCG_0160  | 202  | 8  | 3  | 3  | 1.05 | 1.01 | 1.02 | 1.06 | 1.02 | 1.00 |
| X020167 | BCG_0161  | 430  | 12 | 8  | 8  | 0.93 | 0.94 | 0.88 | 0.95 | 0.96 | 1.00 |
| X020167 | BCG_0165C | 125  | 5  | 2  | 2  | 1.53 | 1.13 | 1.10 | 1.21 | 1.12 | 1.00 |
| X020167 | BCG_0172  | 68   | 3  | 2  | 2  | 1.20 | 0.97 | 1.11 | 1.05 | 0.88 | 1.00 |
| X020167 | BCG_0173C | 89   | 3  | 2  | 2  | 1.08 | 1.31 | 1.12 | 1.09 | 0.98 | 1.00 |
| X020167 | BCG_0180  | 124  | 4  | 2  | 2  | 0.88 | 1.03 | 1.05 | 0.94 | 0.99 | 1.00 |
| X020167 | BCG_0183  | 860  | 22 | 14 | 14 | 0.87 | 0.80 | 0.87 | 0.73 | 1.04 | 1.00 |
| X020167 | BCG_0184  | 756  | 16 | 8  | 10 | 0.94 | 0.92 | 1.04 | 0.93 | 1.11 | 1.00 |
| X020167 | BCG_0191  | 981  | 19 | 14 | 16 | 0.98 | 0.95 | 1.03 | 1.02 | 1.05 | 1.00 |
| X020167 | BCG_0193  | 385  | 9  | 5  | 5  | 0.95 | 0.92 | 1.05 | 1.02 | 1.14 | 1.00 |
| X020167 | BCG_0197  | 141  | 3  | 3  | 3  | 1.15 | 1.12 | 1.10 | 0.98 | 1.13 | 1.00 |
| X020167 | BCG_0200  | 154  | 3  | 3  | 3  | 0.83 | 0.88 | 0.92 | 0.89 | 1.10 | 1.00 |
| X020167 | BCG_0207  | 235  | 6  | 2  | 2  | 0.99 | 1.03 | 0.90 | 0.90 | 1.07 | 1.00 |
| X020167 | BCG_0209  | 210  | 6  | 2  | 2  | 0.97 | 1.01 | 0.96 | 1.02 | 0.93 | 1.00 |
| X020167 | BCG_0210  | 237  | 6  | 3  | 3  | 1.02 | 1.02 | 0.96 | 0.96 | 0.99 | 1.00 |
| X020167 | BCG_0211  | 144  | 6  | 3  | 3  | 0.97 | 1.04 | 0.92 | 1.05 | 0.96 | 1.00 |
| X020167 | BCG_0213  | 173  | 4  | 3  | 3  | 0.92 | 0.90 | 0.98 | 0.94 | 1.06 | 1.00 |
| X020167 | BCG_0215  | 489  | 8  | 6  | 6  | 0.83 | 1.02 | 0.90 | 0.96 | 1.03 | 1.00 |
| X020167 | BCG_0217C | 168  | 5  | 3  | 3  | 1.09 | 1.03 | 0.99 | 1.00 | 0.99 | 1.00 |
| X020167 | BCG_0220  | 329  | 8  | 6  | 6  | 0.99 | 0.90 | 0.95 | 0.94 | 1.09 | 1.00 |
| X020167 | BCG_0226C | 251  | 8  | 3  | 3  | 1.13 | 0.99 | 0.98 | 1.00 | 1.19 | 1.00 |
| X020167 | BCG_0227  | 265  | 7  | 4  | 4  | 0.96 | 1.16 | 0.92 | 0.94 | 1.02 | 1.00 |
| X020167 | BCG_0235C | 224  | 6  | 4  | 4  | 0.78 | 0.79 | 0.91 | 0.82 | 0.99 | 1.00 |
| X020167 | BCG_0239C | 58   | 3  | 2  | 2  | 1.21 | 1.19 | 1.25 | 1.10 | 1.09 | 1.00 |
| X020167 | BCG_0243C | 630  | 19 | 11 | 11 | 0.95 | 0.91 | 1.04 | 1.02 | 1.09 | 1.00 |
| X020167 | BCG_0248  | 130  | 5  | 3  | 3  | 1.24 | 1.15 | 1.12 | 1.05 | 0.97 | 1.00 |
| X020167 | BCG_0252C | 66   | 2  | 2  | 2  | 0.99 | 1.18 | 1.01 | 1.01 | 0.88 | 1.00 |
| X020167 | BCG_0253  | 179  | 6  | 4  | 4  | 0.99 | 0.93 | 0.96 | 0.91 | 1.04 | 1.00 |
| X020167 | BCG_0264C | 680  | 17 | 9  | 10 | 0.85 | 0.84 | 0.98 | 0.99 | 1.07 | 1.00 |
| X020167 | BCG_0271C | 414  | 8  | 3  | 3  | 1.06 | 1.00 | 1.05 | 0.99 | 0.97 | 1.00 |
| X020167 | BCG_0275  | 78   | 6  | 2  | 2  | 1.01 | 1.11 | 0.98 | 0.95 | 0.81 | 1.00 |
| X020167 | BCG_0279C | 83   | 4  | 2  | 2  | 2.21 | 0.95 | 1.50 | 0.96 | 1.11 | 1.00 |
| X020167 | BCG_0280C | 1175 | 28 | 18 | 21 | 0.95 | 0.89 | 0.99 | 1.00 | 1.05 | 1.00 |
| X020167 | BCG_0281  | 629  | 19 | 11 | 12 | 1.43 | 1.05 | 1.19 | 1.03 | 1.06 | 1.00 |
| X020167 | BCG_0282C | 518  | 10 | 9  | 9  | 0.92 | 0.94 | 0.97 | 0.91 | 1.03 | 1.00 |
| X020167 | BCG_0285C | 789  | 20 | 13 | 15 | 0.94 | 0.95 | 0.98 | 0.95 | 1.06 | 1.00 |
| X020167 | BCG_0286C | 1035 | 29 | 18 | 18 | 0.95 | 0.94 | 1.06 | 1.03 | 1.09 | 1.00 |

|         |           |      |    |    |    |      |      |      |      |      |      |
|---------|-----------|------|----|----|----|------|------|------|------|------|------|
| X020167 | BCG_0287C | 240  | 5  | 3  | 3  | 1.02 | 1.05 | 1.05 | 1.17 | 1.13 | 1.00 |
| X020167 | BCG_0288C | 101  | 2  | 2  | 2  | 1.28 | 1.11 | 1.20 | 1.25 | 1.12 | 1.00 |
| X020167 | BCG_0289C | 206  | 7  | 4  | 4  | 0.87 | 0.84 | 0.99 | 0.94 | 1.13 | 1.00 |
| X020167 | BCG_0298C | 239  | 8  | 4  | 4  | 1.11 | 1.21 | 1.04 | 1.02 | 1.04 | 1.00 |
| X020167 | BCG_0308  | 485  | 14 | 9  | 9  | 0.88 | 0.89 | 0.96 | 0.95 | 1.02 | 1.00 |
| X020167 | BCG_0324  | 144  | 4  | 2  | 2  | 1.10 | 1.02 | 0.99 | 1.15 | 0.98 | 1.00 |
| X020167 | BCG_0330  | 107  | 4  | 2  | 2  | 1.04 | 1.00 | 1.23 | 1.09 | 1.22 | 1.00 |
| X020167 | BCG_0347C | 58   | 3  | 2  | 2  | 1.55 | 1.45 | 0.99 | 1.62 | 0.92 | 1.00 |
| X020167 | BCG_0357C | 87   | 3  | 3  | 3  | 0.97 | 0.84 | 0.96 | 0.89 | 1.01 | 1.00 |
| X020167 | BCG_0370  | 93   | 2  | 2  | 2  | 1.04 | 0.98 | 0.85 | 0.83 | 1.02 | 1.00 |
| X020167 | BCG_0377C | 516  | 19 | 9  | 9  | 1.08 | 0.95 | 0.99 | 1.06 | 1.07 | 1.00 |
| X020167 | BCG_0389  | 1786 | 61 | 30 | 47 | 0.81 | 0.88 | 1.05 | 1.02 | 1.07 | 1.00 |
| X020167 | BCG_0390  | 382  | 14 | 7  | 8  | 1.00 | 1.18 | 1.11 | 1.15 | 1.11 | 1.00 |
| X020167 | BCG_0391  | 228  | 8  | 4  | 4  | 0.96 | 1.04 | 0.95 | 1.04 | 1.01 | 1.00 |
| X020167 | BCG_0396  | 192  | 4  | 3  | 3  | 1.11 | 1.02 | 1.22 | 0.98 | 0.92 | 1.00 |
| X020167 | BCG_0398C | 118  | 2  | 2  | 2  | 0.93 | 1.03 | 0.96 | 0.94 | 0.98 | 1.00 |
| X020167 | BCG_0399  | 145  | 4  | 2  | 2  | 1.01 | 1.31 | 1.06 | 1.12 | 0.92 | 1.00 |
| X020167 | BCG_0401C | 533  | 12 | 11 | 11 | 0.81 | 0.83 | 1.03 | 0.90 | 1.06 | 1.00 |
| X020167 | BCG_0402  | 45   | 2  | 2  | 2  | 0.93 | 0.89 | 1.02 | 0.96 | 1.17 | 1.00 |
| X020167 | BCG_0403C | 251  | 5  | 4  | 4  | 1.07 | 0.86 | 1.03 | 0.95 | 1.00 | 1.00 |
| X020167 | BCG_0417  | 154  | 6  | 2  | 4  | 0.93 | 0.95 | 0.91 | 1.08 | 0.96 | 1.00 |
| X020167 | BCG_0422C | 939  | 20 | 14 | 14 | 1.14 | 0.93 | 1.07 | 1.02 | 1.14 | 1.00 |
| X020167 | BCG_0427  | 82   | 3  | 2  | 2  | 1.04 | 1.02 | 1.01 | 1.15 | 1.09 | 1.00 |
| X020167 | BCG_0428  | 100  | 2  | 2  | 2  | 0.99 | 1.04 | 0.95 | 0.98 | 0.98 | 1.00 |
| X020167 | BCG_0431C | 168  | 3  | 2  | 2  | 1.01 | 0.80 | 0.93 | 0.73 | 0.90 | 1.00 |
| X020167 | BCG_0437C | 408  | 13 | 8  | 10 | 0.83 | 0.80 | 0.73 | 0.93 | 0.91 | 1.00 |
| X020167 | BCG_0445C | 221  | 5  | 5  | 5  | 1.09 | 0.92 | 0.90 | 0.93 | 1.02 | 1.00 |
| X020167 | BCG_0446  | 316  | 7  | 5  | 5  | 0.93 | 0.82 | 0.89 | 0.87 | 0.98 | 1.00 |
| X020167 | BCG_0451C | 154  | 4  | 2  | 2  | 0.81 | 0.81 | 0.86 | 0.82 | 0.90 | 1.00 |
| X020167 | BCG_0452  | 85   | 3  | 2  | 2  | 0.95 | 1.12 | 1.01 | 0.94 | 0.83 | 1.00 |
| X020167 | BCG_0457  | 583  | 14 | 9  | 9  | 1.05 | 1.12 | 1.10 | 1.02 | 1.07 | 1.00 |
| X020167 | BCG_0462C | 242  | 8  | 4  | 4  | 1.09 | 1.01 | 1.00 | 0.98 | 1.03 | 1.00 |
| X020167 | BCG_0466C | 62   | 2  | 2  | 2  | 0.93 | 0.84 | 0.82 | 0.99 | 0.94 | 1.00 |
| X020167 | BCG_0468C | 133  | 3  | 2  | 2  | 1.03 | 0.87 | 1.04 | 0.90 | 1.05 | 1.00 |
| X020167 | BCG_0476C | 139  | 3  | 3  | 3  | 0.90 | 0.88 | 0.92 | 0.89 | 1.10 | 1.00 |
| X020167 | BCG_0478C | 155  | 3  | 2  | 2  | 1.36 | 1.07 | 0.99 | 1.21 | 1.13 | 1.00 |
| X020167 | BCG_0479  | 2178 | 85 | 27 | 53 | 0.89 | 0.88 | 1.13 | 1.03 | 1.14 | 1.00 |
| X020167 | BCG_0502  | 984  | 19 | 14 | 15 | 0.82 | 0.83 | 0.95 | 0.91 | 1.05 | 1.00 |
| X020167 | BCG_0504C | 403  | 14 | 6  | 8  | 0.95 | 1.05 | 1.03 | 1.01 | 1.00 | 1.00 |
| X020167 | BCG_0505C | 122  | 6  | 2  | 2  | 0.93 | 0.86 | 1.00 | 0.91 | 1.00 | 1.00 |

|         |           |     |    |    |    |      |      |      |      |      |      |
|---------|-----------|-----|----|----|----|------|------|------|------|------|------|
| X020167 | BCG_0506  | 116 | 4  | 2  | 2  | 1.57 | 1.42 | 1.31 | 1.45 | 1.16 | 1.00 |
| X020167 | BCG_0507  | 267 | 7  | 2  | 2  | 0.83 | 0.81 | 0.90 | 0.90 | 1.01 | 1.00 |
| X020167 | BCG_0508  | 608 | 10 | 8  | 8  | 0.92 | 0.96 | 1.10 | 1.00 | 1.05 | 1.00 |
| X020167 | BCG_0509  | 618 | 13 | 7  | 7  | 0.92 | 0.85 | 0.93 | 0.89 | 0.97 | 1.00 |
| X020167 | BCG_0510C | 723 | 19 | 10 | 11 | 0.84 | 0.86 | 1.01 | 0.96 | 1.12 | 1.00 |
| X020167 | BCG_0513C | 169 | 6  | 2  | 2  | 0.96 | 0.90 | 0.89 | 0.93 | 0.93 | 1.00 |
| X020167 | BCG_0516  | 572 | 14 | 10 | 10 | 1.50 | 0.85 | 0.89 | 0.75 | 0.87 | 1.00 |
| X020167 | BCG_0520C | 327 | 7  | 6  | 6  | 1.62 | 0.90 | 1.19 | 1.13 | 1.27 | 1.00 |
| X020167 | BCG_0521C | 159 | 4  | 2  | 2  | 0.93 | 0.85 | 0.90 | 0.85 | 0.90 | 1.00 |
| X020167 | BCG_0525C | 217 | 5  | 2  | 2  | 0.98 | 1.07 | 0.98 | 1.11 | 0.98 | 1.00 |
| X020167 | BCG_0530  | 208 | 5  | 3  | 3  | 1.11 | 0.98 | 1.00 | 1.00 | 1.13 | 1.00 |
| X020167 | BCG_0531  | 247 | 8  | 5  | 5  | 0.85 | 1.07 | 0.94 | 0.92 | 0.80 | 1.00 |
| X020167 | BCG_0532  | 178 | 4  | 3  | 3  | 1.09 | 0.90 | 1.05 | 0.99 | 1.12 | 1.00 |
| X020167 | BCG_0537C | 64  | 2  | 2  | 2  | 1.01 | 0.76 | 0.80 | 0.74 | 0.99 | 1.00 |
| X020167 | BCG_0540  | 283 | 6  | 5  | 5  | 1.12 | 1.00 | 1.06 | 0.90 | 1.01 | 1.00 |
| X020167 | BCG_0542  | 221 | 6  | 4  | 4  | 0.90 | 0.93 | 0.95 | 0.96 | 0.88 | 1.00 |
| X020167 | BCG_0543  | 161 | 3  | 2  | 2  | 1.49 | 1.56 | 1.32 | 1.10 | 1.24 | 1.00 |
| X020167 | BCG_0546C | 342 | 9  | 6  | 6  | 1.01 | 1.02 | 1.01 | 1.02 | 1.14 | 1.00 |
| X020167 | BCG_0547C | 118 | 4  | 4  | 4  | 0.93 | 0.95 | 0.96 | 0.94 | 1.02 | 1.00 |
| X020167 | BCG_0554  | 362 | 10 | 5  | 5  | 0.98 | 0.99 | 0.98 | 0.96 | 0.93 | 1.00 |
| X020167 | BCG_0555  | 332 | 8  | 6  | 6  | 1.04 | 0.99 | 1.00 | 1.07 | 1.03 | 1.00 |
| X020167 | BCG_0556  | 154 | 5  | 2  | 2  | 1.00 | 0.85 | 1.07 | 0.97 | 1.24 | 1.00 |
| X020167 | BCG_0566C | 119 | 4  | 3  | 3  | 1.24 | 1.13 | 0.97 | 0.95 | 1.22 | 1.00 |
| X020167 | BCG_0567  | 209 | 8  | 4  | 4  | 0.85 | 0.81 | 0.84 | 0.89 | 0.80 | 1.00 |
| X020167 | BCG_0573  | 436 | 13 | 8  | 9  | 0.96 | 1.03 | 1.00 | 1.02 | 1.17 | 1.00 |
| X020167 | BCG_0592C | 197 | 5  | 4  | 4  | 0.93 | 1.10 | 0.98 | 0.99 | 0.98 | 1.00 |
| X020167 | BCG_0599  | 122 | 5  | 2  | 2  | 1.13 | 1.25 | 1.08 | 1.03 | 0.98 | 1.00 |
| X020167 | BCG_0603  | 132 | 2  | 2  | 2  | 1.30 | 1.18 | 1.21 | 1.06 | 1.13 | 1.00 |
| X020167 | BCG_0607  | 194 | 5  | 3  | 3  | 1.39 | 1.01 | 1.12 | 1.04 | 1.02 | 1.00 |
| X020167 | BCG_0611C | 230 | 7  | 4  | 4  | 0.87 | 0.85 | 0.99 | 0.89 | 1.04 | 1.00 |
| X020167 | BCG_0613  | 229 | 5  | 3  | 3  | 1.02 | 0.88 | 0.83 | 0.76 | 0.84 | 1.00 |
| X020167 | BCG_0614  | 99  | 3  | 2  | 2  | 1.14 | 1.14 | 1.22 | 1.07 | 1.01 | 1.00 |
| X020167 | BCG_0622  | 313 | 5  | 4  | 4  | 1.55 | 1.01 | 1.79 | 1.26 | 1.55 | 1.00 |
| X020167 | BCG_0625C | 189 | 6  | 4  | 5  | 1.07 | 0.97 | 1.02 | 0.98 | 1.05 | 1.00 |
| X020167 | BCG_0660C | 224 | 6  | 3  | 3  | 0.87 | 0.88 | 0.84 | 0.78 | 0.83 | 1.00 |
| X020167 | BCG_0680C | 167 | 4  | 3  | 3  | 0.94 | 0.95 | 1.06 | 0.98 | 1.06 | 1.00 |
| X020167 | BCG_0681C | 83  | 3  | 2  | 2  | 0.98 | 1.18 | 0.88 | 0.91 | 1.15 | 1.00 |
| X020167 | BCG_0683  | 95  | 7  | 3  | 4  | 0.77 | 0.96 | 0.99 | 1.02 | 0.99 | 1.00 |
| X020167 | BCG_0685  | 237 | 8  | 6  | 6  | 0.85 | 0.86 | 0.96 | 0.97 | 1.04 | 1.00 |
| X020167 | BCG_0686  | 168 | 6  | 4  | 4  | 1.04 | 1.02 | 1.07 | 1.05 | 0.99 | 1.00 |

|         |           |      |     |    |    |      |      |      |      |      |      |
|---------|-----------|------|-----|----|----|------|------|------|------|------|------|
| X020167 | BCG_0687  | 254  | 6   | 4  | 5  | 1.12 | 0.96 | 0.99 | 1.03 | 1.02 | 1.00 |
| X020167 | BCG_0688  | 267  | 8   | 6  | 6  | 1.01 | 1.02 | 1.03 | 0.96 | 1.43 | 1.00 |
| X020167 | BCG_0689  | 552  | 17  | 8  | 10 | 0.79 | 0.92 | 0.86 | 0.96 | 0.89 | 1.00 |
| X020167 | BCG_0690  | 951  | 29  | 17 | 19 | 0.86 | 0.90 | 0.90 | 0.98 | 0.90 | 1.00 |
| X020167 | BCG_0691C | 152  | 5   | 4  | 4  | 1.00 | 1.00 | 1.03 | 1.01 | 1.08 | 1.00 |
| X020167 | BCG_0692C | 92   | 4   | 2  | 2  | 1.39 | 1.11 | 0.96 | 1.18 | 1.07 | 1.00 |
| X020167 | BCG_0693C | 156  | 5   | 4  | 4  | 0.98 | 0.99 | 1.02 | 1.07 | 1.00 | 1.00 |
| X020167 | BCG_0695C | 224  | 7   | 4  | 4  | 0.93 | 1.06 | 0.87 | 1.02 | 0.93 | 1.00 |
| X020167 | BCG_0696C | 212  | 8   | 3  | 3  | 1.27 | 0.77 | 0.85 | 1.21 | 0.86 | 1.00 |
| X020167 | BCG_0700  | 599  | 19  | 9  | 12 | 0.75 | 0.84 | 0.84 | 0.93 | 0.89 | 1.00 |
| X020167 | BCG_0701  | 353  | 19  | 6  | 14 | 0.72 | 0.79 | 0.89 | 0.95 | 0.89 | 1.00 |
| X020167 | BCG_0704  | 523  | 13  | 7  | 7  | 0.97 | 0.81 | 1.11 | 0.99 | 1.18 | 1.00 |
| X020167 | BCG_0712  | 283  | 10  | 4  | 4  | 1.02 | 0.99 | 1.12 | 1.04 | 1.15 | 1.00 |
| X020167 | BCG_0716  | 2314 | 65  | 36 | 42 | 1.02 | 0.90 | 1.04 | 1.01 | 1.10 | 1.00 |
| X020167 | BCG_0717  | 4106 | 106 | 71 | 80 | 0.97 | 0.82 | 0.97 | 0.93 | 1.11 | 1.00 |
| X020167 | BCG_0719  | 134  | 3   | 3  | 3  | 1.71 | 0.71 | 0.99 | 0.88 | 1.01 | 1.00 |
| X020167 | BCG_0724  | 189  | 5   | 3  | 3  | 0.98 | 0.86 | 0.94 | 0.81 | 0.87 | 1.00 |
| X020167 | BCG_0726C | 232  | 5   | 4  | 4  | 0.95 | 1.03 | 1.03 | 1.04 | 1.18 | 1.00 |
| X020167 | BCG_0727  | 125  | 3   | 2  | 2  | 1.24 | 1.07 | 0.96 | 1.03 | 0.99 | 1.00 |
| X020167 | BCG_0731  | 126  | 10  | 4  | 7  | 0.83 | 0.73 | 0.91 | 0.76 | 1.07 | 1.00 |
| X020167 | BCG_0732  | 564  | 24  | 12 | 17 | 0.82 | 0.95 | 0.88 | 0.95 | 0.93 | 1.00 |
| X020167 | BCG_0733  | 1037 | 26  | 18 | 19 | 0.96 | 0.89 | 1.00 | 0.95 | 1.03 | 1.00 |
| X020167 | BCG_0734  | 1304 | 43  | 19 | 26 | 0.95 | 0.91 | 1.02 | 0.94 | 1.05 | 1.00 |
| X020167 | BCG_0737  | 128  | 3   | 3  | 3  | 0.97 | 0.83 | 1.04 | 0.87 | 1.08 | 1.00 |
| X020167 | BCG_0750  | 489  | 14  | 9  | 11 | 0.92 | 1.09 | 0.90 | 1.00 | 0.95 | 1.00 |
| X020167 | BCG_0751  | 692  | 24  | 14 | 21 | 0.97 | 0.99 | 0.97 | 1.04 | 0.97 | 1.00 |
| X020167 | BCG_0752  | 455  | 14  | 7  | 10 | 0.79 | 0.83 | 0.89 | 0.94 | 0.88 | 1.00 |
| X020167 | BCG_0753  | 470  | 13  | 6  | 7  | 0.74 | 0.79 | 0.94 | 0.91 | 0.91 | 1.00 |
| X020167 | BCG_0754  | 471  | 20  | 8  | 10 | 0.96 | 0.87 | 0.92 | 1.00 | 1.09 | 1.00 |
| X020167 | BCG_0755  | 324  | 13  | 6  | 10 | 0.86 | 0.81 | 0.97 | 0.97 | 0.85 | 1.00 |
| X020167 | BCG_0756  | 231  | 8   | 4  | 4  | 1.13 | 0.95 | 1.13 | 1.20 | 1.28 | 1.00 |
| X020167 | BCG_0757  | 1118 | 38  | 19 | 24 | 0.83 | 0.90 | 0.96 | 0.93 | 0.97 | 1.00 |
| X020167 | BCG_0758  | 239  | 14  | 5  | 5  | 0.85 | 0.87 | 1.09 | 0.99 | 1.11 | 1.00 |
| X020167 | BCG_0759  | 317  | 10  | 6  | 6  | 1.03 | 1.17 | 1.11 | 1.26 | 0.99 | 1.00 |
| X020167 | BCG_0760  | 442  | 17  | 7  | 10 | 0.79 | 0.86 | 0.87 | 0.92 | 0.86 | 1.00 |
| X020167 | BCG_0764  | 553  | 19  | 12 | 13 | 0.87 | 0.95 | 0.97 | 0.96 | 1.02 | 1.00 |
| X020167 | BCG_0765  | 253  | 9   | 6  | 7  | 0.79 | 0.85 | 1.05 | 0.93 | 0.99 | 1.00 |
| X020167 | BCG_0766  | 565  | 19  | 9  | 12 | 0.83 | 0.89 | 0.96 | 0.97 | 1.00 | 1.00 |
| X020167 | BCG_0768  | 414  | 17  | 8  | 9  | 0.92 | 1.02 | 0.92 | 1.01 | 0.93 | 1.00 |
| X020167 | BCG_0769  | 418  | 16  | 7  | 11 | 0.84 | 0.92 | 0.96 | 0.96 | 0.97 | 1.00 |

|         |           |      |    |    |    |      |      |      |      |      |      |
|---------|-----------|------|----|----|----|------|------|------|------|------|------|
| X020167 | BCG_0770  | 185  | 5  | 4  | 4  | 1.04 | 1.17 | 1.09 | 1.13 | 0.96 | 1.00 |
| X020167 | BCG_0771  | 775  | 15 | 13 | 14 | 1.76 | 1.04 | 1.41 | 1.01 | 1.23 | 1.00 |
| X020167 | BCG_0772  | 128  | 7  | 2  | 3  | 1.08 | 0.75 | 1.42 | 0.90 | 0.97 | 1.00 |
| X020167 | BCG_0773  | 358  | 12 | 4  | 8  | 0.88 | 0.93 | 0.97 | 1.08 | 0.91 | 1.00 |
| X020167 | BCG_0774  | 191  | 3  | 3  | 3  | 1.15 | 0.96 | 1.06 | 1.04 | 1.04 | 1.00 |
| X020167 | BCG_0780  | 441  | 10 | 6  | 6  | 0.93 | 0.88 | 1.02 | 0.94 | 1.12 | 1.00 |
| X020167 | BCG_0781C | 273  | 7  | 4  | 4  | 1.01 | 0.95 | 0.99 | 0.95 | 1.02 | 1.00 |
| X020167 | BCG_0782  | 297  | 10 | 6  | 6  | 1.05 | 0.97 | 1.13 | 1.01 | 1.03 | 1.00 |
| X020167 | BCG_0783  | 521  | 14 | 9  | 10 | 0.85 | 0.86 | 0.97 | 0.91 | 1.05 | 1.00 |
| X020167 | BCG_0804C | 381  | 13 | 7  | 7  | 0.99 | 1.12 | 1.06 | 1.11 | 1.02 | 1.00 |
| X020167 | BCG_0809  | 327  | 7  | 4  | 4  | 0.99 | 0.93 | 0.96 | 0.99 | 1.06 | 1.00 |
| X020167 | BCG_0811C | 105  | 3  | 2  | 2  | 1.07 | 1.06 | 0.94 | 1.08 | 0.97 | 1.00 |
| X020167 | BCG_0812C | 168  | 3  | 3  | 3  | 0.97 | 0.88 | 1.01 | 1.01 | 1.14 | 1.00 |
| X020167 | BCG_0813C | 507  | 18 | 8  | 9  | 0.80 | 0.87 | 0.97 | 0.94 | 1.03 | 1.00 |
| X020167 | BCG_0822  | 154  | 4  | 3  | 3  | 1.01 | 0.92 | 0.93 | 0.92 | 1.07 | 1.00 |
| X020167 | BCG_0824  | 510  | 14 | 8  | 8  | 0.87 | 0.95 | 0.80 | 1.10 | 0.78 | 1.00 |
| X020167 | BCG_0829  | 123  | 3  | 3  | 3  | 1.30 | 1.06 | 0.95 | 1.04 | 1.05 | 1.00 |
| X020167 | BCG_0831C | 148  | 4  | 2  | 2  | 1.26 | 1.08 | 1.14 | 1.02 | 1.04 | 1.00 |
| X020167 | BCG_0835  | 344  | 8  | 6  | 6  | 1.15 | 1.12 | 1.01 | 0.93 | 0.97 | 1.00 |
| X020167 | BCG_0841  | 147  | 3  | 3  | 3  | 1.10 | 1.13 | 1.03 | 1.08 | 1.03 | 1.00 |
| X020167 | BCG_0850C | 486  | 10 | 6  | 6  | 0.96 | 0.88 | 0.98 | 0.88 | 0.85 | 1.00 |
| X020167 | BCG_0855  | 85   | 3  | 2  | 2  | 1.25 | 1.34 | 1.14 | 1.38 | 1.22 | 1.00 |
| X020167 | BCG_0856  | 114  | 3  | 2  | 2  | 1.10 | 1.20 | 0.90 | 0.99 | 0.83 | 1.00 |
| X020167 | BCG_0858C | 89   | 3  | 3  | 3  | 1.00 | 0.87 | 0.84 | 0.71 | 0.95 | 1.00 |
| X020167 | BCG_0861  | 192  | 6  | 3  | 3  | 0.84 | 0.79 | 0.96 | 0.95 | 1.00 | 1.00 |
| X020167 | BCG_0863C | 129  | 3  | 2  | 2  | 0.94 | 0.81 | 0.85 | 0.91 | 1.12 | 1.00 |
| X020167 | BCG_0866C | 196  | 7  | 2  | 2  | 0.92 | 1.15 | 1.10 | 1.12 | 1.09 | 1.00 |
| X020167 | BCG_0877C | 595  | 17 | 11 | 13 | 0.90 | 0.83 | 0.98 | 0.91 | 1.06 | 1.00 |
| X020167 | BCG_0884C | 467  | 12 | 6  | 6  | 1.17 | 1.26 | 1.19 | 1.10 | 1.18 | 1.00 |
| X020167 | BCG_0906  | 68   | 2  | 2  | 2  | 0.74 | 0.67 | 0.69 | 0.72 | 0.69 | 1.00 |
| X020167 | BCG_0911  | 374  | 9  | 5  | 6  | 0.87 | 0.95 | 1.11 | 1.06 | 1.15 | 1.00 |
| X020167 | BCG_0912  | 973  | 23 | 13 | 14 | 0.93 | 0.89 | 1.01 | 0.99 | 1.11 | 1.00 |
| X020167 | BCG_0923  | 351  | 12 | 6  | 8  | 0.76 | 0.84 | 0.81 | 0.86 | 0.84 | 1.00 |
| X020167 | BCG_0925  | 1037 | 26 | 18 | 19 | 0.89 | 0.90 | 0.97 | 0.99 | 1.02 | 1.00 |
| X020167 | BCG_0936C | 168  | 5  | 4  | 4  | 0.88 | 0.90 | 1.01 | 0.93 | 1.10 | 1.00 |
| X020167 | BCG_0941C | 103  | 3  | 2  | 2  | 1.13 | 0.77 | 0.92 | 0.78 | 0.86 | 1.00 |
| X020167 | BCG_0948  | 483  | 14 | 10 | 12 | 0.82 | 0.90 | 0.99 | 1.05 | 1.07 | 1.00 |
| X020167 | BCG_0955C | 431  | 12 | 7  | 7  | 1.07 | 0.99 | 1.03 | 0.97 | 0.94 | 1.00 |
| X020167 | BCG_0957  | 419  | 10 | 7  | 8  | 0.92 | 0.93 | 0.94 | 0.89 | 1.05 | 1.00 |
| X020167 | BCG_0963  | 104  | 3  | 2  | 2  | 0.92 | 0.80 | 0.98 | 1.03 | 0.92 | 1.00 |

|         |           |     |    |    |    |      |      |      |      |      |      |
|---------|-----------|-----|----|----|----|------|------|------|------|------|------|
| X020167 | BCG_0977C | 266 | 7  | 4  | 4  | 1.00 | 0.94 | 0.91 | 0.87 | 0.91 | 1.00 |
| X020167 | BCG_0978C | 121 | 3  | 2  | 2  | 1.05 | 1.19 | 0.94 | 0.97 | 0.94 | 1.00 |
| X020167 | BCG_0980  | 513 | 11 | 8  | 8  | 0.91 | 0.92 | 0.97 | 0.90 | 1.00 | 1.00 |
| X020167 | BCG_0984C | 95  | 3  | 2  | 2  | 0.93 | 0.79 | 0.90 | 0.88 | 0.93 | 1.00 |
| X020167 | BCG_0985C | 222 | 7  | 4  | 4  | 0.77 | 0.86 | 0.97 | 0.90 | 0.98 | 1.00 |
| X020167 | BCG_0988  | 199 | 6  | 2  | 4  | 0.84 | 0.91 | 0.93 | 0.90 | 1.00 | 1.00 |
| X020167 | BCG_0994C | 116 | 3  | 2  | 2  | 1.08 | 1.18 | 0.99 | 1.03 | 1.05 | 1.00 |
| X020167 | BCG_1000C | 240 | 6  | 5  | 5  | 1.14 | 0.97 | 1.02 | 0.97 | 1.02 | 1.00 |
| X020167 | BCG_1005  | 691 | 19 | 12 | 14 | 0.95 | 0.86 | 0.99 | 0.90 | 1.00 | 1.00 |
| X020167 | BCG_1006  | 496 | 14 | 7  | 8  | 0.91 | 0.96 | 0.97 | 0.95 | 0.99 | 1.00 |
| X020167 | BCG_1011  | 101 | 3  | 2  | 2  | 1.07 | 0.95 | 0.93 | 0.89 | 0.96 | 1.00 |
| X020167 | BCG_1012  | 111 | 4  | 2  | 2  | 1.04 | 1.01 | 1.02 | 1.06 | 1.11 | 1.00 |
| X020167 | BCG_1022  | 132 | 5  | 3  | 3  | 1.26 | 1.09 | 1.07 | 1.09 | 1.05 | 1.00 |
| X020167 | BCG_1023  | 380 | 13 | 9  | 9  | 0.99 | 0.94 | 1.01 | 1.06 | 1.11 | 1.00 |
| X020167 | BCG_1034  | 75  | 3  | 2  | 2  | 1.37 | 0.95 | 1.48 | 1.15 | 1.54 | 1.00 |
| X020167 | BCG_1039  | 466 | 7  | 6  | 6  | 1.08 | 1.02 | 0.99 | 0.90 | 1.06 | 1.00 |
| X020167 | BCG_1049  | 141 | 4  | 4  | 4  | 1.01 | 1.08 | 1.08 | 0.93 | 1.06 | 1.00 |
| X020167 | BCG_1050  | 160 | 5  | 3  | 3  | 1.33 | 1.29 | 1.18 | 1.14 | 1.16 | 1.00 |
| X020167 | BCG_1064C | 260 | 7  | 2  | 2  | 1.15 | 1.23 | 0.96 | 1.00 | 1.03 | 1.00 |
| X020167 | BCG_1067  | 447 | 12 | 9  | 9  | 1.19 | 0.89 | 0.97 | 0.91 | 0.95 | 1.00 |
| X020167 | BCG_1072C | 244 | 7  | 4  | 4  | 0.86 | 0.91 | 0.93 | 0.92 | 0.91 | 1.00 |
| X020167 | BCG_1074C | 547 | 16 | 8  | 9  | 0.94 | 1.02 | 0.99 | 1.01 | 1.07 | 1.00 |
| X020167 | BCG_1075C | 132 | 3  | 2  | 2  | 0.79 | 0.92 | 0.87 | 0.87 | 0.84 | 1.00 |
| X020167 | BCG_1080  | 495 | 10 | 8  | 8  | 0.87 | 0.89 | 1.06 | 1.11 | 1.10 | 1.00 |
| X020167 | BCG_1116  | 78  | 3  | 2  | 2  | 1.17 | 1.17 | 1.04 | 1.21 | 1.15 | 1.00 |
| X020167 | BCG_1118  | 140 | 3  | 3  | 3  | 1.35 | 1.18 | 1.03 | 0.98 | 1.30 | 1.00 |
| X020167 | BCG_1128C | 444 | 12 | 7  | 8  | 0.94 | 1.01 | 0.98 | 1.02 | 1.02 | 1.00 |
| X020167 | BCG_1129C | 222 | 5  | 3  | 3  | 1.06 | 1.03 | 1.02 | 1.04 | 1.01 | 1.00 |
| X020167 | BCG_1132C | 370 | 7  | 6  | 6  | 1.02 | 0.91 | 1.00 | 0.94 | 1.14 | 1.00 |
| X020167 | BCG_1135  | 228 | 4  | 3  | 3  | 1.01 | 1.09 | 1.05 | 1.04 | 1.14 | 1.00 |
| X020167 | BCG_1136  | 271 | 10 | 4  | 7  | 1.02 | 1.06 | 1.05 | 1.09 | 1.04 | 1.00 |
| X020167 | BCG_1138C | 518 | 10 | 8  | 8  | 0.87 | 0.95 | 1.03 | 1.03 | 1.05 | 1.00 |
| X020167 | BCG_1140  | 267 | 6  | 4  | 4  | 1.00 | 0.90 | 0.88 | 0.96 | 0.99 | 1.00 |
| X020167 | BCG_1153  | 577 | 15 | 9  | 9  | 0.89 | 0.84 | 1.02 | 0.92 | 1.04 | 1.00 |
| X020167 | BCG_1154  | 765 | 15 | 10 | 10 | 1.12 | 1.00 | 1.03 | 1.00 | 1.16 | 1.00 |
| X020167 | BCG_1158C | 642 | 16 | 14 | 14 | 0.93 | 0.92 | 1.01 | 0.96 | 1.05 | 1.00 |
| X020167 | BCG_1159C | 330 | 9  | 5  | 5  | 0.93 | 1.11 | 1.01 | 1.02 | 1.01 | 1.00 |
| X020167 | BCG_1166C | 69  | 2  | 2  | 2  | 0.96 | 0.92 | 1.11 | 0.80 | 0.88 | 1.00 |
| X020167 | BCG_1169C | 454 | 10 | 7  | 8  | 1.04 | 0.98 | 1.03 | 1.02 | 1.07 | 1.00 |
| X020167 | BCG_1179C | 145 | 6  | 2  | 2  | 1.60 | 1.01 | 1.44 | 0.89 | 1.13 | 1.00 |



|         |           |      |    |    |    |      |      |      |      |      |      |
|---------|-----------|------|----|----|----|------|------|------|------|------|------|
| X020167 | BCG_1182  | 137  | 5  | 4  | 4  | 1.30 | 1.23 | 1.06 | 1.12 | 1.19 | 1.00 |
| X020167 | BCG_1183  | 328  | 11 | 6  | 6  | 0.93 | 1.01 | 0.97 | 0.99 | 1.01 | 1.00 |
| X020167 | BCG_1194C | 1747 | 44 | 31 | 35 | 1.07 | 1.00 | 1.07 | 1.01 | 1.11 | 1.00 |
| X020167 | BCG_1206  | 294  | 6  | 4  | 4  | 1.24 | 1.13 | 1.08 | 1.07 | 1.04 | 1.00 |
| X020167 | BCG_1217  | 88   | 4  | 3  | 3  | 1.14 | 0.92 | 0.93 | 0.94 | 0.93 | 1.00 |
| X020167 | BCG_1221C | 120  | 5  | 3  | 4  | 0.90 | 0.83 | 0.78 | 0.94 | 0.86 | 1.00 |
| X020167 | BCG_1241  | 158  | 3  | 3  | 3  | 0.85 | 0.90 | 0.85 | 0.90 | 0.88 | 1.00 |
| X020167 | BCG_1252  | 389  | 8  | 6  | 6  | 1.06 | 1.03 | 0.98 | 0.99 | 1.12 | 1.00 |
| X020167 | BCG_1253  | 105  | 2  | 2  | 2  | 1.21 | 0.89 | 1.06 | 0.90 | 0.98 | 1.00 |
| X020167 | BCG_1261C | 327  | 7  | 6  | 6  | 1.03 | 1.13 | 0.98 | 1.00 | 1.06 | 1.00 |
| X020167 | BCG_1266  | 135  | 7  | 2  | 2  | 1.07 | 0.86 | 0.99 | 1.06 | 1.26 | 1.00 |
| X020167 | BCG_1278C | 198  | 7  | 4  | 4  | 1.10 | 0.92 | 0.89 | 0.97 | 0.98 | 1.00 |
| X020167 | BCG_1283  | 937  | 15 | 13 | 13 | 0.91 | 1.03 | 1.06 | 1.03 | 1.04 | 1.00 |
| X020167 | BCG_1289C | 191  | 5  | 4  | 4  | 1.08 | 1.07 | 1.01 | 1.10 | 1.17 | 1.00 |
| X020167 | BCG_1294  | 114  | 4  | 2  | 2  | 0.94 | 0.84 | 1.01 | 1.02 | 1.15 | 1.00 |
| X020167 | BCG_1298  | 135  | 3  | 2  | 2  | 1.43 | 1.19 | 1.22 | 1.18 | 1.14 | 1.00 |
| X020167 | BCG_1300  | 783  | 15 | 11 | 11 | 1.02 | 1.01 | 1.00 | 0.98 | 1.11 | 1.00 |
| X020167 | BCG_1305C | 351  | 7  | 4  | 5  | 0.99 | 0.88 | 0.99 | 0.94 | 1.04 | 1.00 |
| X020167 | BCG_1308C | 1261 | 37 | 18 | 18 | 0.98 | 0.90 | 1.08 | 1.07 | 1.10 | 1.00 |
| X020167 | BCG_1313  | 372  | 9  | 4  | 4  | 0.98 | 0.98 | 0.86 | 1.01 | 0.96 | 1.00 |
| X020167 | BCG_1320C | 105  | 2  | 2  | 2  | 1.05 | 0.98 | 1.14 | 0.96 | 1.14 | 1.00 |
| X020167 | BCG_1322  | 92   | 4  | 2  | 2  | 1.34 | 1.31 | 1.04 | 1.00 | 1.23 | 1.00 |
| X020167 | BCG_1324  | 175  | 5  | 4  | 5  | 0.80 | 0.96 | 0.83 | 0.97 | 0.89 | 1.00 |
| X020167 | BCG_1329C | 369  | 8  | 7  | 7  | 0.90 | 0.97 | 0.94 | 0.96 | 1.01 | 1.00 |
| X020167 | BCG_1333  | 83   | 3  | 2  | 2  | 1.01 | 0.98 | 1.00 | 0.93 | 0.99 | 1.00 |
| X020167 | BCG_1334  | 478  | 11 | 9  | 9  | 0.85 | 0.95 | 0.95 | 0.95 | 1.03 | 1.00 |
| X020167 | BCG_1338  | 170  | 8  | 3  | 3  | 1.23 | 1.15 | 1.05 | 1.01 | 1.05 | 1.00 |
| X020167 | BCG_1340C | 210  | 7  | 3  | 3  | 1.13 | 0.92 | 0.93 | 0.98 | 1.06 | 1.00 |
| X020167 | BCG_1342C | 203  | 6  | 4  | 4  | 0.94 | 0.97 | 1.04 | 1.04 | 1.02 | 1.00 |
| X020167 | BCG_1352  | 224  | 8  | 2  | 2  | 1.03 | 0.95 | 0.94 | 0.86 | 0.98 | 1.00 |
| X020167 | BCG_1354  | 536  | 12 | 10 | 10 | 0.97 | 1.10 | 1.06 | 1.07 | 1.02 | 1.00 |
| X020167 | BCG_1355  | 313  | 7  | 3  | 3  | 1.04 | 0.96 | 0.97 | 0.99 | 1.07 | 1.00 |
| X020167 | BCG_1357  | 1433 | 38 | 26 | 29 | 1.06 | 1.09 | 1.10 | 1.09 | 1.13 | 1.00 |
| X020167 | BCG_1358  | 127  | 3  | 3  | 3  | 0.75 | 0.99 | 0.91 | 0.92 | 0.96 | 1.00 |
| X020167 | BCG_1367  | 854  | 20 | 15 | 15 | 0.94 | 0.96 | 1.05 | 1.05 | 1.05 | 1.00 |
| X020167 | BCG_1368  | 1102 | 31 | 23 | 26 | 0.90 | 0.89 | 1.07 | 1.01 | 1.12 | 1.00 |
| X020167 | BCG_1369  | 571  | 15 | 9  | 9  | 1.03 | 1.08 | 0.96 | 1.03 | 1.05 | 1.00 |
| X020167 | BCG_1370  | 1105 | 31 | 16 | 21 | 0.95 | 1.07 | 0.99 | 1.02 | 1.19 | 1.00 |
| X020167 | BCG_1371  | 260  | 6  | 4  | 4  | 1.03 | 1.04 | 0.94 | 1.02 | 1.01 | 1.00 |
| X020167 | BCG_1385  | 553  | 12 | 8  | 8  | 1.07 | 1.05 | 1.09 | 0.99 | 0.96 | 1.00 |

|         |           |      |    |    |    |      |      |      |      |      |      |
|---------|-----------|------|----|----|----|------|------|------|------|------|------|
| X020167 | BCG_1386  | 515  | 9  | 5  | 5  | 1.30 | 1.05 | 1.18 | 1.03 | 1.20 | 1.00 |
| X020167 | BCG_1389C | 897  | 24 | 17 | 18 | 0.90 | 0.95 | 0.85 | 1.01 | 0.98 | 1.00 |
| X020167 | BCG_1397  | 88   | 3  | 2  | 2  | 1.02 | 0.96 | 0.97 | 1.03 | 0.94 | 1.00 |
| X020167 | BCG_1402  | 79   | 3  | 2  | 2  | 1.35 | 1.17 | 1.05 | 1.33 | 1.05 | 1.00 |
| X020167 | BCG_1425C | 147  | 5  | 5  | 5  | 0.84 | 1.08 | 0.94 | 0.95 | 0.96 | 1.00 |
| X020167 | BCG_1429C | 160  | 5  | 3  | 3  | 0.98 | 0.90 | 1.04 | 1.03 | 1.14 | 1.00 |
| X020167 | BCG_1438C | 54   | 2  | 2  | 2  | 1.11 | 1.13 | 0.99 | 0.90 | 0.97 | 1.00 |
| X020167 | BCG_1441  | 127  | 4  | 2  | 2  | 0.95 | 0.86 | 0.93 | 0.95 | 1.18 | 1.00 |
| X020167 | BCG_1444  | 172  | 4  | 2  | 2  | 1.06 | 1.08 | 1.01 | 0.97 | 1.07 | 1.00 |
| X020167 | BCG_1449  | 385  | 13 | 7  | 10 | 1.67 | 0.88 | 1.17 | 0.95 | 0.97 | 1.00 |
| X020167 | BCG_1452  | 232  | 7  | 5  | 5  | 1.03 | 1.00 | 1.01 | 1.01 | 0.99 | 1.00 |
| X020167 | BCG_1453  | 614  | 16 | 11 | 13 | 1.01 | 1.02 | 1.06 | 1.11 | 1.06 | 1.00 |
| X020167 | BCG_1458C | 44   | 2  | 2  | 2  | 0.98 | 0.92 | 0.98 | 1.24 | 0.95 | 1.00 |
| X020167 | BCG_1465  | 145  | 2  | 2  | 2  | 1.02 | 0.98 | 1.05 | 0.94 | 1.12 | 1.00 |
| X020167 | BCG_1472C | 457  | 9  | 8  | 8  | 0.90 | 0.93 | 1.01 | 0.91 | 0.98 | 1.00 |
| X020167 | BCG_1473  | 253  | 6  | 4  | 4  | 0.85 | 0.76 | 0.82 | 0.81 | 0.96 | 1.00 |
| X020167 | BCG_1477  | 198  | 4  | 3  | 3  | 1.13 | 1.06 | 1.01 | 1.04 | 1.04 | 1.00 |
| X020167 | BCG_1484  | 303  | 7  | 3  | 3  | 1.70 | 1.88 | 1.10 | 1.06 | 1.09 | 1.00 |
| X020167 | BCG_1497  | 563  | 12 | 7  | 8  | 0.91 | 0.82 | 1.00 | 0.92 | 1.09 | 1.00 |
| X020167 | BCG_1498  | 308  | 7  | 3  | 3  | 0.91 | 0.83 | 0.94 | 0.84 | 1.16 | 1.00 |
| X020167 | BCG_1499  | 303  | 8  | 5  | 5  | 0.95 | 0.93 | 0.93 | 0.92 | 1.08 | 1.00 |
| X020167 | BCG_1507C | 360  | 9  | 3  | 3  | 1.03 | 1.20 | 1.06 | 0.98 | 1.04 | 1.00 |
| X020167 | BCG_1508C | 136  | 5  | 2  | 2  | 1.14 | 0.87 | 1.07 | 0.97 | 1.06 | 1.00 |
| X020167 | BCG_1509C | 434  | 11 | 9  | 9  | 0.88 | 0.99 | 1.00 | 0.92 | 1.05 | 1.00 |
| X020167 | BCG_1510C | 685  | 17 | 10 | 10 | 0.94 | 0.90 | 1.03 | 0.99 | 1.09 | 1.00 |
| X020167 | BCG_1515C | 204  | 4  | 3  | 3  | 0.92 | 0.74 | 0.92 | 0.81 | 0.96 | 1.00 |
| X020167 | BCG_1522  | 213  | 7  | 5  | 5  | 0.95 | 0.93 | 1.01 | 1.00 | 1.07 | 1.00 |
| X020167 | BCG_1523  | 258  | 8  | 5  | 5  | 0.79 | 0.81 | 0.72 | 0.76 | 0.76 | 1.00 |
| X020167 | BCG_1524  | 542  | 11 | 8  | 8  | 0.90 | 0.90 | 1.01 | 0.94 | 1.09 | 1.00 |
| X020167 | BCG_1525  | 289  | 7  | 4  | 4  | 1.10 | 0.94 | 1.01 | 0.93 | 1.04 | 1.00 |
| X020167 | BCG_1526  | 163  | 3  | 2  | 2  | 0.98 | 0.98 | 0.97 | 1.01 | 1.03 | 1.00 |
| X020167 | BCG_1527  | 247  | 4  | 3  | 3  | 1.09 | 1.27 | 1.15 | 1.18 | 1.09 | 1.00 |
| X020167 | BCG_1532  | 104  | 2  | 2  | 2  | 0.86 | 0.93 | 0.87 | 0.92 | 0.97 | 1.00 |
| X020167 | BCG_1537C | 1051 | 29 | 17 | 17 | 1.14 | 0.95 | 1.04 | 0.98 | 1.03 | 1.00 |
| X020167 | BCG_1541  | 698  | 22 | 14 | 19 | 0.94 | 0.90 | 0.99 | 0.96 | 1.07 | 1.00 |
| X020167 | BCG_1542  | 180  | 5  | 4  | 4  | 1.19 | 1.05 | 1.00 | 1.01 | 0.99 | 1.00 |
| X020167 | BCG_1543  | 220  | 7  | 3  | 3  | 1.01 | 1.01 | 0.95 | 0.98 | 1.01 | 1.00 |
| X020167 | BCG_1545  | 339  | 9  | 6  | 7  | 1.02 | 1.04 | 0.94 | 1.06 | 0.97 | 1.00 |
| X020167 | BCG_1546  | 477  | 15 | 7  | 9  | 0.79 | 0.93 | 0.79 | 0.96 | 0.86 | 1.00 |
| X020167 | BCG_1550  | 1098 | 25 | 16 | 17 | 0.86 | 0.90 | 1.08 | 1.00 | 1.08 | 1.00 |

|         |           |      |    |    |    |      |      |      |      |      |      |
|---------|-----------|------|----|----|----|------|------|------|------|------|------|
| X020167 | BCG_1551  | 45   | 2  | 2  | 2  | 1.29 | 1.26 | 1.21 | 1.28 | 1.30 | 1.00 |
| X020167 | BCG_1555  | 147  | 4  | 2  | 2  | 1.11 | 1.32 | 1.19 | 1.09 | 1.10 | 1.00 |
| X020167 | BCG_1556  | 373  | 7  | 2  | 2  | 0.87 | 0.75 | 0.92 | 0.72 | 1.20 | 1.00 |
| X020167 | BCG_1579C | 641  | 22 | 8  | 8  | 1.27 | 1.01 | 1.08 | 1.51 | 1.06 | 1.00 |
| X020167 | BCG_1595  | 934  | 20 | 13 | 13 | 0.91 | 0.94 | 1.08 | 0.99 | 1.05 | 1.00 |
| X020167 | BCG_1610  | 401  | 8  | 5  | 5  | 1.11 | 1.10 | 1.06 | 0.99 | 1.04 | 1.00 |
| X020167 | BCG_1624  | 339  | 8  | 6  | 6  | 0.82 | 0.84 | 0.85 | 0.89 | 0.91 | 1.00 |
| X020167 | BCG_1634  | 95   | 4  | 2  | 2  | 0.88 | 0.87 | 0.89 | 0.91 | 0.96 | 1.00 |
| X020167 | BCG_1636C | 268  | 6  | 3  | 3  | 1.19 | 1.09 | 0.92 | 1.00 | 0.86 | 1.00 |
| X020167 | BCG_1639  | 101  | 3  | 3  | 3  | 0.86 | 0.90 | 0.90 | 0.92 | 0.92 | 1.00 |
| X020167 | BCG_1641  | 299  | 7  | 5  | 5  | 1.06 | 0.99 | 0.90 | 1.02 | 1.03 | 1.00 |
| X020167 | BCG_1643  | 182  | 5  | 3  | 3  | 0.90 | 0.86 | 0.92 | 0.93 | 1.00 | 1.00 |
| X020167 | BCG_1649  | 442  | 10 | 8  | 8  | 1.11 | 1.01 | 1.00 | 0.97 | 0.99 | 1.00 |
| X020167 | BCG_1650  | 408  | 10 | 5  | 6  | 1.05 | 1.03 | 0.97 | 1.05 | 0.97 | 1.00 |
| X020167 | BCG_1651  | 377  | 9  | 7  | 7  | 0.95 | 0.91 | 0.96 | 0.89 | 1.03 | 1.00 |
| X020167 | BCG_1652  | 263  | 6  | 4  | 4  | 1.12 | 1.12 | 0.94 | 0.99 | 0.91 | 1.00 |
| X020167 | BCG_1655  | 524  | 14 | 7  | 8  | 0.93 | 0.82 | 1.00 | 0.91 | 1.02 | 1.00 |
| X020167 | BCG_1664  | 357  | 7  | 7  | 7  | 1.00 | 0.82 | 0.95 | 0.90 | 1.07 | 1.00 |
| X020167 | BCG_1668  | 1817 | 70 | 33 | 51 | 0.74 | 0.89 | 0.87 | 0.96 | 0.87 | 1.00 |
| X020167 | BCG_1674  | 659  | 13 | 9  | 9  | 0.96 | 0.99 | 1.04 | 0.97 | 1.13 | 1.00 |
| X020167 | BCG_1675C | 123  | 3  | 2  | 2  | 0.71 | 0.78 | 0.85 | 1.02 | 0.93 | 1.00 |
| X020167 | BCG_1676  | 966  | 23 | 17 | 17 | 0.95 | 0.84 | 0.90 | 0.86 | 0.99 | 1.00 |
| X020167 | BCG_1680  | 512  | 14 | 10 | 10 | 1.34 | 0.92 | 1.14 | 0.87 | 0.96 | 1.00 |
| X020167 | BCG_1681  | 101  | 7  | 2  | 3  | 0.74 | 1.01 | 1.09 | 1.13 | 0.85 | 1.00 |
| X020167 | BCG_1682  | 268  | 11 | 5  | 6  | 0.72 | 0.81 | 0.84 | 0.91 | 0.89 | 1.00 |
| X020167 | BCG_1688  | 160  | 4  | 2  | 2  | 0.96 | 1.03 | 1.01 | 0.98 | 1.11 | 1.00 |
| X020167 | BCG_1689  | 230  | 8  | 4  | 4  | 1.00 | 1.12 | 0.97 | 1.13 | 0.95 | 1.00 |
| X020167 | BCG_1691  | 242  | 5  | 3  | 3  | 0.91 | 0.75 | 0.90 | 0.87 | 0.97 | 1.00 |
| X020167 | BCG_1693  | 108  | 4  | 2  | 3  | 0.96 | 0.87 | 0.96 | 0.93 | 1.05 | 1.00 |
| X020167 | BCG_1694  | 113  | 3  | 2  | 2  | 1.15 | 0.86 | 0.83 | 0.88 | 0.84 | 1.00 |
| X020167 | BCG_1695  | 72   | 4  | 2  | 2  | 1.10 | 0.78 | 0.87 | 0.76 | 0.94 | 1.00 |
| X020167 | BCG_1697  | 315  | 7  | 6  | 6  | 0.90 | 0.87 | 1.00 | 0.97 | 1.06 | 1.00 |
| X020167 | BCG_1721  | 343  | 10 | 4  | 4  | 1.05 | 0.88 | 0.88 | 0.91 | 1.03 | 1.00 |
| X020167 | BCG_1729  | 500  | 12 | 7  | 7  | 0.91 | 1.16 | 0.82 | 1.19 | 1.27 | 1.00 |
| X020167 | BCG_1741C | 296  | 9  | 6  | 6  | 1.08 | 0.95 | 1.07 | 0.94 | 1.07 | 1.00 |
| X020167 | BCG_1747  | 176  | 7  | 2  | 2  | 0.85 | 0.87 | 0.92 | 0.92 | 0.95 | 1.00 |
| X020167 | BCG_1750  | 272  | 8  | 4  | 6  | 0.87 | 1.00 | 0.89 | 0.97 | 0.92 | 1.00 |
| X020167 | BCG_1770  | 391  | 11 | 7  | 7  | 0.97 | 0.99 | 0.99 | 1.05 | 1.14 | 1.00 |
| X020167 | BCG_1771C | 195  | 4  | 4  | 4  | 0.85 | 0.86 | 0.99 | 0.97 | 1.01 | 1.00 |
| X020167 | BCG_1777  | 147  | 3  | 3  | 3  | 0.96 | 0.92 | 0.96 | 0.96 | 1.05 | 1.00 |

|         |           |      |    |    |    |      |      |      |      |      |      |
|---------|-----------|------|----|----|----|------|------|------|------|------|------|
| X020167 | BCG_1790  | 196  | 7  | 4  | 4  | 1.09 | 1.05 | 0.99 | 0.99 | 1.07 | 1.00 |
| X020167 | BCG_1803C | 283  | 10 | 7  | 8  | 0.87 | 1.05 | 1.01 | 0.95 | 1.05 | 1.00 |
| X020167 | BCG_1807  | 537  | 13 | 9  | 9  | 0.94 | 0.96 | 1.00 | 0.91 | 1.05 | 1.00 |
| X020167 | BCG_1812C | 1183 | 31 | 20 | 21 | 0.95 | 0.99 | 1.02 | 1.04 | 1.05 | 1.00 |
| X020167 | BCG_1813  | 368  | 8  | 5  | 5  | 0.95 | 0.89 | 0.85 | 0.94 | 0.96 | 1.00 |
| X020167 | BCG_1815  | 268  | 6  | 4  | 4  | 1.03 | 0.93 | 0.91 | 1.02 | 1.10 | 1.00 |
| X020167 | BCG_1816  | 352  | 9  | 6  | 6  | 1.02 | 0.90 | 0.98 | 0.96 | 1.10 | 1.00 |
| X020167 | BCG_1826  | 380  | 7  | 6  | 6  | 0.90 | 0.82 | 0.92 | 0.79 | 1.04 | 1.00 |
| X020167 | BCG_1827  | 232  | 6  | 3  | 3  | 0.83 | 0.86 | 0.89 | 0.99 | 0.84 | 1.00 |
| X020167 | BCG_1830  | 70   | 4  | 2  | 2  | 1.07 | 1.09 | 0.93 | 0.92 | 0.83 | 1.00 |
| X020167 | BCG_1854C | 268  | 8  | 6  | 6  | 1.18 | 1.12 | 1.13 | 1.12 | 1.12 | 1.00 |
| X020167 | BCG_1856  | 296  | 8  | 4  | 4  | 0.98 | 0.88 | 1.00 | 0.94 | 1.09 | 1.00 |
| X020167 | BCG_1862  | 408  | 11 | 4  | 6  | 1.03 | 0.96 | 1.02 | 1.01 | 1.14 | 1.00 |
| X020167 | BCG_1864  | 121  | 4  | 3  | 3  | 1.12 | 1.06 | 1.08 | 1.09 | 1.06 | 1.00 |
| X020167 | BCG_1868C | 174  | 9  | 4  | 4  | 1.13 | 0.97 | 1.08 | 1.02 | 1.10 | 1.00 |
| X020167 | BCG_1871C | 514  | 9  | 6  | 6  | 0.99 | 1.01 | 1.08 | 1.02 | 1.02 | 1.00 |
| X020167 | BCG_1872C | 1051 | 31 | 19 | 21 | 1.00 | 0.91 | 1.01 | 0.93 | 1.05 | 1.00 |
| X020167 | BCG_1879C | 167  | 6  | 3  | 3  | 0.99 | 0.91 | 0.95 | 0.93 | 1.00 | 1.00 |
| X020167 | BCG_1888  | 181  | 4  | 2  | 2  | 0.81 | 0.84 | 0.88 | 0.88 | 1.01 | 1.00 |
| X020167 | BCG_1890C | 486  | 11 | 7  | 7  | 0.91 | 0.84 | 0.87 | 0.84 | 0.97 | 1.00 |
| X020167 | BCG_1891C | 447  | 11 | 9  | 9  | 0.93 | 0.88 | 0.86 | 0.91 | 0.91 | 1.00 |
| X020167 | BCG_1901C | 169  | 3  | 3  | 3  | 1.11 | 1.00 | 1.09 | 1.03 | 0.97 | 1.00 |
| X020167 | BCG_1905C | 436  | 10 | 5  | 5  | 1.19 | 1.00 | 1.03 | 0.98 | 1.02 | 1.00 |
| X020167 | BCG_1908C | 1029 | 29 | 17 | 20 | 1.01 | 0.83 | 0.92 | 0.80 | 1.16 | 1.00 |
| X020167 | BCG_1911  | 107  | 3  | 2  | 2  | 0.93 | 0.88 | 0.90 | 0.94 | 0.96 | 1.00 |
| X020167 | BCG_1912  | 346  | 10 | 7  | 8  | 0.78 | 0.87 | 0.82 | 0.79 | 0.88 | 1.00 |
| X020167 | BCG_1920C | 148  | 3  | 2  | 2  | 1.48 | 1.33 | 1.10 | 1.12 | 1.29 | 1.00 |
| X020167 | BCG_1925C | 157  | 5  | 2  | 2  | 1.13 | 1.08 | 1.06 | 0.94 | 1.19 | 1.00 |
| X020167 | BCG_1947C | 1134 | 24 | 19 | 21 | 0.91 | 0.84 | 1.00 | 0.97 | 1.08 | 1.00 |
| X020167 | BCG_1951C | 352  | 17 | 6  | 7  | 1.40 | 0.98 | 1.28 | 0.93 | 1.05 | 1.00 |
| X020167 | BCG_1954  | 1251 | 34 | 24 | 24 | 0.99 | 1.02 | 1.09 | 1.05 | 1.12 | 1.00 |
| X020167 | BCG_1958C | 300  | 9  | 5  | 5  | 1.20 | 1.13 | 1.01 | 0.98 | 1.07 | 1.00 |
| X020167 | BCG_1963C | 178  | 7  | 4  | 4  | 0.94 | 1.18 | 1.10 | 1.16 | 1.07 | 1.00 |
| X020167 | BCG_1964  | 548  | 14 | 7  | 7  | 0.90 | 0.94 | 0.93 | 0.94 | 1.12 | 1.00 |
| X020167 | BCG_1968C | 348  | 10 | 7  | 8  | 1.05 | 0.95 | 0.95 | 1.01 | 1.00 | 1.00 |
| X020167 | BCG_1971  | 332  | 6  | 4  | 4  | 0.91 | 0.86 | 1.03 | 0.98 | 1.07 | 1.00 |
| X020167 | BCG_2010C | 109  | 4  | 2  | 2  | 1.11 | 0.92 | 1.03 | 1.10 | 1.18 | 1.00 |
| X020167 | BCG_2019  | 201  | 5  | 3  | 3  | 0.94 | 0.88 | 0.96 | 0.88 | 0.95 | 1.00 |
| X020167 | BCG_2022C | 84   | 2  | 2  | 2  | 0.77 | 0.79 | 0.91 | 0.91 | 1.06 | 1.00 |
| X020167 | BCG_2035  | 83   | 3  | 2  | 2  | 1.09 | 1.00 | 1.09 | 1.07 | 1.04 | 1.00 |

|         |           |      |    |    |    |      |      |      |      |      |      |
|---------|-----------|------|----|----|----|------|------|------|------|------|------|
| X020167 | BCG_2050C | 352  | 14 | 7  | 8  | 0.92 | 0.86 | 1.03 | 0.96 | 1.08 | 1.00 |
| X020167 | BCG_2067C | 909  | 24 | 16 | 16 | 0.95 | 0.87 | 0.94 | 0.89 | 0.91 | 1.00 |
| X020167 | BCG_2068C | 133  | 2  | 2  | 2  | 1.53 | 1.17 | 1.47 | 1.11 | 1.15 | 1.00 |
| X020167 | BCG_2069  | 227  | 6  | 3  | 4  | 1.54 | 0.92 | 1.00 | 1.15 | 1.15 | 1.00 |
| X020167 | BCG_2070C | 359  | 10 | 7  | 7  | 0.91 | 0.93 | 0.95 | 0.91 | 1.02 | 1.00 |
| X020167 | BCG_2073  | 640  | 18 | 11 | 12 | 1.41 | 1.03 | 1.04 | 0.91 | 1.13 | 1.00 |
| X020167 | BCG_2080C | 110  | 3  | 3  | 3  | 1.06 | 1.13 | 1.02 | 1.03 | 1.12 | 1.00 |
| X020167 | BCG_2111C | 299  | 7  | 5  | 5  | 0.79 | 1.04 | 0.95 | 0.90 | 1.10 | 1.00 |
| X020167 | BCG_2112C | 747  | 21 | 15 | 15 | 1.03 | 1.11 | 0.94 | 1.07 | 0.93 | 1.00 |
| X020167 | BCG_2114C | 150  | 3  | 3  | 3  | 0.73 | 0.72 | 0.88 | 0.86 | 1.01 | 1.00 |
| X020167 | BCG_2117C | 648  | 17 | 11 | 12 | 0.97 | 0.90 | 1.03 | 0.97 | 1.04 | 1.00 |
| X020167 | BCG_2126C | 221  | 6  | 3  | 3  | 0.97 | 0.94 | 1.11 | 1.00 | 1.17 | 1.00 |
| X020167 | BCG_2127C | 433  | 9  | 8  | 8  | 0.86 | 0.95 | 1.06 | 1.02 | 1.10 | 1.00 |
| X020167 | BCG_2128C | 245  | 5  | 4  | 4  | 0.76 | 0.93 | 0.96 | 1.09 | 1.04 | 1.00 |
| X020167 | BCG_2129C | 93   | 4  | 2  | 2  | 1.22 | 1.14 | 0.95 | 1.07 | 1.06 | 1.00 |
| X020167 | BCG_2132C | 661  | 22 | 11 | 11 | 0.95 | 0.92 | 0.96 | 1.02 | 0.97 | 1.00 |
| X020167 | BCG_2135C | 449  | 12 | 9  | 9  | 0.97 | 0.92 | 0.87 | 1.11 | 1.03 | 1.00 |
| X020167 | BCG_2146C | 189  | 7  | 2  | 2  | 1.06 | 1.15 | 0.88 | 0.97 | 0.91 | 1.00 |
| X020167 | BCG_2147C | 174  | 6  | 3  | 3  | 1.15 | 1.26 | 1.06 | 1.02 | 1.03 | 1.00 |
| X020167 | BCG_2150C | 419  | 9  | 5  | 5  | 0.95 | 1.01 | 0.76 | 1.02 | 0.79 | 1.00 |
| X020167 | BCG_2157C | 183  | 4  | 2  | 2  | 0.96 | 0.96 | 0.79 | 1.02 | 0.91 | 1.00 |
| X020167 | BCG_2158C | 145  | 5  | 3  | 3  | 1.07 | 0.98 | 0.87 | 0.91 | 1.00 | 1.00 |
| X020167 | BCG_2162C | 1035 | 34 | 16 | 21 | 0.92 | 1.17 | 1.07 | 1.24 | 1.08 | 1.00 |
| X020167 | BCG_2163C | 46   | 2  | 2  | 2  | 1.21 | 1.06 | 1.16 | 1.07 | 0.99 | 1.00 |
| X020167 | BCG_2167C | 361  | 7  | 5  | 5  | 0.92 | 0.85 | 0.88 | 0.83 | 0.92 | 1.00 |
| X020167 | BCG_2168C | 347  | 9  | 6  | 6  | 1.24 | 0.92 | 0.97 | 0.96 | 1.01 | 1.00 |
| X020167 | BCG_2170C | 120  | 3  | 3  | 3  | 1.06 | 1.16 | 0.99 | 1.05 | 1.00 | 1.00 |
| X020167 | BCG_2172C | 121  | 3  | 2  | 2  | 1.16 | 1.14 | 0.94 | 1.03 | 0.90 | 1.00 |
| X020167 | BCG_2182C | 108  | 3  | 3  | 3  | 1.88 | 1.26 | 1.17 | 1.11 | 1.00 | 1.00 |
| X020167 | BCG_2183C | 246  | 7  | 5  | 5  | 0.70 | 0.68 | 0.77 | 0.72 | 0.90 | 1.00 |
| X020167 | BCG_2187C | 341  | 7  | 4  | 4  | 0.97 | 1.07 | 0.93 | 0.90 | 1.01 | 1.00 |
| X020167 | BCG_2190C | 114  | 5  | 3  | 3  | 0.97 | 1.25 | 0.99 | 1.25 | 0.87 | 1.00 |
| X020167 | BCG_2193C | 485  | 12 | 8  | 8  | 0.99 | 0.98 | 1.04 | 1.08 | 1.11 | 1.00 |
| X020167 | BCG_2200C | 480  | 15 | 8  | 11 | 0.80 | 0.81 | 0.92 | 0.83 | 1.04 | 1.00 |
| X020167 | BCG_2204C | 145  | 4  | 2  | 2  | 1.31 | 1.08 | 1.07 | 0.99 | 0.95 | 1.00 |
| X020167 | BCG_2210  | 161  | 5  | 4  | 4  | 0.89 | 0.83 | 0.97 | 0.91 | 1.01 | 1.00 |
| X020167 | BCG_2211  | 577  | 12 | 9  | 9  | 1.06 | 0.95 | 0.99 | 1.03 | 1.06 | 1.00 |
| X020167 | BCG_2212  | 190  | 7  | 5  | 6  | 0.98 | 0.93 | 1.01 | 1.06 | 1.09 | 1.00 |
| X020167 | BCG_2214C | 80   | 2  | 2  | 2  | 0.96 | 0.78 | 0.92 | 0.90 | 0.97 | 1.00 |
| X020167 | BCG_2216C | 482  | 13 | 8  | 8  | 0.89 | 0.95 | 0.99 | 1.12 | 1.05 | 1.00 |

|         |           |     |    |    |    |      |      |      |      |      |      |
|---------|-----------|-----|----|----|----|------|------|------|------|------|------|
| X020167 | BCG_2217  | 143 | 6  | 2  | 2  | 1.09 | 0.87 | 1.09 | 0.90 | 1.12 | 1.00 |
| X020167 | BCG_2218C | 421 | 11 | 7  | 7  | 1.09 | 1.35 | 1.06 | 1.30 | 1.08 | 1.00 |
| X020167 | BCG_2219  | 136 | 3  | 2  | 2  | 0.80 | 0.91 | 0.95 | 0.91 | 0.95 | 1.00 |
| X020167 | BCG_2220C | 337 | 9  | 5  | 6  | 0.91 | 0.97 | 1.06 | 1.27 | 1.15 | 1.00 |
| X020167 | BCG_2226C | 260 | 6  | 5  | 5  | 0.91 | 0.90 | 0.98 | 0.88 | 0.98 | 1.00 |
| X020167 | BCG_2227C | 226 | 6  | 4  | 5  | 0.91 | 0.85 | 0.97 | 1.26 | 1.06 | 1.00 |
| X020167 | BCG_2230C | 413 | 11 | 5  | 5  | 1.05 | 0.98 | 0.98 | 0.96 | 1.09 | 1.00 |
| X020167 | BCG_2231  | 984 | 23 | 15 | 17 | 0.91 | 0.88 | 1.09 | 1.07 | 1.13 | 1.00 |
| X020167 | BCG_2235  | 424 | 9  | 7  | 7  | 0.95 | 0.74 | 0.82 | 0.75 | 0.97 | 1.00 |
| X020167 | BCG_2239C | 449 | 16 | 6  | 8  | 0.92 | 1.11 | 0.86 | 1.02 | 0.88 | 1.00 |
| X020167 | BCG_2241C | 289 | 8  | 6  | 6  | 0.92 | 0.92 | 1.00 | 0.98 | 1.06 | 1.00 |
| X020167 | BCG_2243  | 492 | 11 | 8  | 8  | 0.86 | 0.76 | 1.08 | 0.79 | 1.00 | 1.00 |
| X020167 | BCG_2254  | 95  | 3  | 2  | 2  | 1.02 | 0.82 | 0.88 | 0.88 | 0.99 | 1.00 |
| X020167 | BCG_2255C | 151 | 4  | 3  | 3  | 1.12 | 1.00 | 1.11 | 1.06 | 1.18 | 1.00 |
| X020167 | BCG_2258  | 352 | 14 | 9  | 9  | 1.10 | 0.98 | 1.10 | 1.08 | 1.23 | 1.00 |
| X020167 | BCG_2260  | 70  | 3  | 2  | 2  | 1.54 | 1.14 | 1.03 | 1.13 | 0.83 | 1.00 |
| X020167 | BCG_2261  | 347 | 9  | 5  | 6  | 0.96 | 0.93 | 0.99 | 1.07 | 1.10 | 1.00 |
| X020167 | BCG_2262  | 151 | 7  | 3  | 3  | 0.84 | 0.82 | 0.97 | 0.95 | 1.05 | 1.00 |
| X020167 | BCG_2263  | 429 | 11 | 8  | 8  | 1.07 | 1.01 | 1.02 | 0.99 | 1.06 | 1.00 |
| X020167 | BCG_2264  | 574 | 12 | 8  | 8  | 1.12 | 1.06 | 1.11 | 1.00 | 1.12 | 1.00 |
| X020167 | BCG_2276C | 309 | 6  | 5  | 5  | 1.00 | 1.00 | 0.98 | 0.90 | 1.01 | 1.00 |
| X020167 | BCG_2280  | 53  | 3  | 2  | 2  | 1.72 | 1.18 | 1.25 | 1.22 | 1.33 | 1.00 |
| X020167 | BCG_2295  | 404 | 9  | 8  | 8  | 0.97 | 0.99 | 0.95 | 0.97 | 0.98 | 1.00 |
| X020167 | BCG_2299  | 229 | 7  | 3  | 3  | 1.02 | 1.10 | 0.96 | 1.14 | 0.94 | 1.00 |
| X020167 | BCG_2305  | 206 | 8  | 2  | 2  | 0.91 | 0.89 | 0.99 | 1.00 | 1.12 | 1.00 |
| X020167 | BCG_2312  | 344 | 8  | 7  | 7  | 1.15 | 0.95 | 0.98 | 0.95 | 1.18 | 1.00 |
| X020167 | BCG_2314  | 715 | 13 | 13 | 13 | 0.92 | 0.95 | 1.11 | 0.99 | 1.21 | 1.00 |
| X020167 | BCG_2315C | 866 | 21 | 14 | 14 | 0.99 | 0.93 | 1.01 | 0.94 | 1.03 | 1.00 |
| X020167 | BCG_2356  | 444 | 9  | 8  | 8  | 0.87 | 0.89 | 0.95 | 0.94 | 0.97 | 1.00 |
| X020167 | BCG_2368  | 481 | 13 | 9  | 9  | 0.98 | 1.01 | 0.96 | 0.95 | 0.96 | 1.00 |
| X020167 | BCG_2371C | 189 | 6  | 3  | 3  | 1.02 | 1.00 | 1.03 | 0.94 | 1.05 | 1.00 |
| X020167 | BCG_2372  | 83  | 2  | 2  | 2  | 1.21 | 1.02 | 0.92 | 0.97 | 1.05 | 1.00 |
| X020167 | BCG_2377  | 603 | 10 | 7  | 7  | 1.08 | 0.94 | 0.91 | 0.94 | 1.08 | 1.00 |
| X020167 | BCG_2380C | 119 | 2  | 2  | 2  | 1.11 | 0.94 | 0.97 | 1.04 | 1.05 | 1.00 |
| X020167 | BCG_2387C | 390 | 11 | 10 | 10 | 0.86 | 0.97 | 0.92 | 0.96 | 0.98 | 1.00 |
| X020167 | BCG_2401  | 128 | 3  | 2  | 2  | 0.98 | 0.87 | 0.97 | 0.94 | 1.14 | 1.00 |
| X020167 | BCG_2405  | 384 | 13 | 6  | 6  | 1.10 | 1.05 | 0.98 | 1.03 | 0.97 | 1.00 |
| X020167 | BCG_2412C | 38  | 2  | 2  | 2  | 1.18 | 0.95 | 1.13 | 1.00 | 1.04 | 1.00 |
| X020167 | BCG_2415C | 123 | 3  | 2  | 2  | 1.11 | 1.02 | 0.90 | 1.09 | 1.10 | 1.00 |
| X020167 | BCG_2418  | 215 | 7  | 4  | 4  | 0.79 | 0.89 | 0.96 | 0.90 | 1.15 | 1.00 |

|         |           |      |     |    |    |      |      |      |      |      |      |
|---------|-----------|------|-----|----|----|------|------|------|------|------|------|
| X020167 | BCG_2428  | 247  | 10  | 5  | 7  | 0.91 | 1.02 | 0.90 | 1.01 | 0.84 | 1.00 |
| X020167 | BCG_2432C | 107  | 4   | 2  | 2  | 0.99 | 0.83 | 0.91 | 0.93 | 0.95 | 1.00 |
| X020167 | BCG_2436C | 199  | 6   | 3  | 3  | 0.87 | 0.93 | 0.91 | 0.99 | 0.88 | 1.00 |
| X020167 | BCG_2444C | 209  | 8   | 4  | 4  | 1.34 | 0.97 | 1.04 | 0.94 | 1.05 | 1.00 |
| X020167 | BCG_2447  | 531  | 14  | 10 | 12 | 1.00 | 0.98 | 1.09 | 0.99 | 1.16 | 1.00 |
| X020167 | BCG_2457C | 294  | 10  | 6  | 6  | 1.04 | 0.98 | 1.01 | 0.98 | 0.91 | 1.00 |
| X020167 | BCG_2460C | 60   | 2   | 2  | 2  | 1.24 | 0.96 | 1.03 | 1.07 | 1.03 | 1.00 |
| X020167 | BCG_2461C | 183  | 5   | 5  | 5  | 0.94 | 0.95 | 1.11 | 1.10 | 0.91 | 1.00 |
| X020167 | BCG_2462C | 283  | 8   | 5  | 7  | 0.87 | 0.84 | 1.00 | 0.91 | 0.92 | 1.00 |
| X020167 | BCG_2464C | 1389 | 33  | 21 | 21 | 1.13 | 1.02 | 1.15 | 1.10 | 1.17 | 1.00 |
| X020167 | BCG_2465C | 284  | 6   | 5  | 5  | 0.93 | 0.95 | 1.01 | 0.93 | 1.02 | 1.00 |
| X020167 | BCG_2469C | 274  | 6   | 4  | 4  | 1.04 | 0.95 | 1.06 | 0.98 | 1.02 | 1.00 |
| X020167 | BCG_2474C | 332  | 8   | 6  | 6  | 1.27 | 1.07 | 1.07 | 1.09 | 1.10 | 1.00 |
| X020167 | BCG_2475C | 136  | 4   | 3  | 3  | 0.98 | 1.03 | 1.04 | 0.98 | 1.02 | 1.00 |
| X020167 | BCG_2477C | 378  | 10  | 5  | 5  | 0.90 | 0.87 | 1.01 | 0.93 | 1.10 | 1.00 |
| X020167 | BCG_2480C | 163  | 10  | 3  | 3  | 0.82 | 0.80 | 0.89 | 0.91 | 1.03 | 1.00 |
| X020167 | BCG_2481C | 527  | 10  | 6  | 7  | 1.07 | 1.09 | 1.04 | 0.97 | 0.97 | 1.00 |
| X020167 | BCG_2482C | 552  | 13  | 5  | 5  | 1.01 | 0.99 | 1.08 | 1.03 | 1.03 | 1.00 |
| X020167 | BCG_2485C | 241  | 5   | 5  | 5  | 1.10 | 1.10 | 1.04 | 1.05 | 1.00 | 1.00 |
| X020167 | BCG_2487  | 290  | 9   | 5  | 5  | 1.13 | 1.06 | 1.03 | 1.12 | 0.96 | 1.00 |
| X020167 | BCG_2496C | 1974 | 46  | 33 | 33 | 1.00 | 0.96 | 1.02 | 1.10 | 1.09 | 1.00 |
| X020167 | BCG_2497C | 658  | 17  | 11 | 11 | 0.89 | 0.89 | 1.00 | 0.95 | 1.05 | 1.00 |
| X020167 | BCG_2500C | 242  | 7   | 2  | 2  | 1.28 | 0.97 | 0.94 | 0.95 | 1.00 | 1.00 |
| X020167 | BCG_2501C | 175  | 6   | 2  | 2  | 1.95 | 0.96 | 1.08 | 0.86 | 1.07 | 1.00 |
| X020167 | BCG_2515C | 601  | 16  | 10 | 10 | 0.98 | 0.99 | 1.05 | 1.05 | 1.07 | 1.00 |
| X020167 | BCG_2517C | 204  | 5   | 2  | 2  | 1.09 | 0.95 | 1.04 | 1.00 | 1.13 | 1.00 |
| X020167 | BCG_2518C | 447  | 7   | 6  | 6  | 0.94 | 0.91 | 0.86 | 0.90 | 0.90 | 1.00 |
| X020167 | BCG_2521C | 1944 | 53  | 33 | 39 | 0.85 | 0.95 | 0.82 | 1.07 | 0.88 | 1.00 |
| X020167 | BCG_2522C | 1503 | 36  | 23 | 28 | 0.89 | 0.98 | 0.77 | 1.07 | 0.90 | 1.00 |
| X020167 | BCG_2529  | 254  | 7   | 4  | 4  | 0.94 | 0.93 | 1.10 | 0.92 | 1.20 | 1.00 |
| X020167 | BCG_2541C | 197  | 8   | 5  | 6  | 0.83 | 0.92 | 0.87 | 0.97 | 0.98 | 1.00 |
| X020167 | BCG_2542  | 200  | 5   | 3  | 3  | 1.01 | 0.85 | 0.99 | 0.93 | 1.12 | 1.00 |
| X020167 | BCG_2545C | 3924 | 100 | 63 | 66 | 0.99 | 0.89 | 0.97 | 0.94 | 1.06 | 1.00 |
| X020167 | BCG_2550  | 355  | 8   | 7  | 7  | 1.14 | 0.98 | 1.00 | 1.03 | 1.04 | 1.00 |
| X020167 | BCG_2555C | 61   | 2   | 2  | 2  | 0.88 | 0.78 | 0.91 | 0.94 | 0.99 | 1.00 |
| X020167 | BCG_2556C | 78   | 5   | 3  | 3  | 1.03 | 0.92 | 1.05 | 0.95 | 1.02 | 1.00 |
| X020167 | BCG_2557C | 383  | 10  | 4  | 5  | 1.04 | 0.96 | 1.03 | 0.93 | 1.11 | 1.00 |
| X020167 | BCG_2558  | 224  | 7   | 4  | 4  | 0.94 | 1.01 | 1.02 | 1.00 | 1.00 | 1.00 |
| X020167 | BCG_2560C | 69   | 2   | 2  | 2  | 0.91 | 1.06 | 0.94 | 0.95 | 0.86 | 1.00 |
| X020167 | BCG_2561C | 134  | 2   | 2  | 2  | 2.09 | 0.87 | 1.14 | 0.87 | 0.90 | 1.00 |

|         |           |     |    |    |    |      |      |      |      |      |      |
|---------|-----------|-----|----|----|----|------|------|------|------|------|------|
| X020167 | BCG_2576C | 389 | 10 | 6  | 7  | 0.95 | 0.81 | 1.02 | 0.94 | 1.03 | 1.00 |
| X020167 | BCG_2578C | 865 | 19 | 12 | 12 | 1.06 | 0.99 | 1.05 | 1.06 | 1.05 | 1.00 |
| X020167 | BCG_2585  | 559 | 11 | 7  | 8  | 0.98 | 0.95 | 1.03 | 1.02 | 1.05 | 1.00 |
| X020167 | BCG_2586  | 322 | 7  | 5  | 5  | 0.87 | 1.06 | 0.94 | 0.98 | 0.84 | 1.00 |
| X020167 | BCG_2594C | 147 | 4  | 3  | 3  | 0.86 | 0.91 | 0.86 | 0.93 | 0.94 | 1.00 |
| X020167 | BCG_2597  | 254 | 8  | 5  | 5  | 1.07 | 1.09 | 0.98 | 1.05 | 1.07 | 1.00 |
| X020167 | BCG_2598  | 167 | 4  | 2  | 2  | 0.90 | 0.92 | 0.94 | 1.06 | 1.06 | 1.00 |
| X020167 | BCG_2602  | 127 | 5  | 3  | 3  | 1.08 | 1.16 | 1.02 | 0.98 | 1.01 | 1.00 |
| X020167 | BCG_2605  | 124 | 4  | 2  | 2  | 0.95 | 1.04 | 0.94 | 1.05 | 0.85 | 1.00 |
| X020167 | BCG_2607C | 535 | 9  | 6  | 6  | 0.79 | 0.80 | 0.96 | 0.92 | 0.97 | 1.00 |
| X020167 | BCG_2609C | 306 | 7  | 7  | 7  | 1.08 | 0.84 | 0.93 | 0.91 | 1.04 | 1.00 |
| X020167 | BCG_2610C | 276 | 9  | 6  | 6  | 1.01 | 1.12 | 1.02 | 1.07 | 1.06 | 1.00 |
| X020167 | BCG_2611C | 91  | 2  | 2  | 2  | 0.88 | 1.12 | 1.00 | 1.04 | 1.13 | 1.00 |
| X020167 | BCG_2616C | 319 | 8  | 6  | 6  | 1.23 | 0.79 | 0.92 | 0.85 | 0.95 | 1.00 |
| X020167 | BCG_2628C | 179 | 4  | 3  | 3  | 0.78 | 0.79 | 0.94 | 0.86 | 1.06 | 1.00 |
| X020167 | BCG_2631C | 521 | 13 | 8  | 11 | 0.94 | 0.96 | 1.08 | 1.02 | 1.07 | 1.00 |
| X020167 | BCG_2639C | 108 | 4  | 2  | 2  | 1.08 | 0.92 | 1.02 | 0.98 | 0.88 | 1.00 |
| X020167 | BCG_2646C | 158 | 5  | 2  | 3  | 0.86 | 1.03 | 0.97 | 0.92 | 0.92 | 1.00 |
| X020167 | BCG_2649  | 655 | 18 | 10 | 11 | 1.17 | 1.09 | 1.16 | 1.12 | 1.11 | 1.00 |
| X020167 | BCG_2650  | 312 | 9  | 7  | 7  | 1.10 | 1.07 | 1.06 | 1.03 | 1.03 | 1.00 |
| X020167 | BCG_2653C | 185 | 4  | 3  | 4  | 1.00 | 0.93 | 1.07 | 1.03 | 1.04 | 1.00 |
| X020167 | BCG_2654C | 91  | 3  | 3  | 3  | 0.93 | 1.12 | 0.82 | 1.04 | 0.88 | 1.00 |
| X020167 | BCG_2656  | 135 | 3  | 3  | 3  | 1.09 | 0.95 | 0.87 | 0.94 | 0.96 | 1.00 |
| X020167 | BCG_2684  | 860 | 27 | 11 | 14 | 0.83 | 1.07 | 0.82 | 1.04 | 0.85 | 1.00 |
| X020167 | BCG_2685  | 254 | 9  | 5  | 5  | 1.06 | 1.06 | 1.05 | 1.13 | 1.10 | 1.00 |
| X020167 | BCG_2687  | 78  | 3  | 2  | 2  | 1.21 | 1.10 | 1.14 | 1.12 | 1.11 | 1.00 |
| X020167 | BCG_2692  | 163 | 3  | 3  | 3  | 1.30 | 1.36 | 1.15 | 1.30 | 1.03 | 1.00 |
| X020167 | BCG_2696  | 119 | 3  | 2  | 2  | 1.46 | 1.10 | 1.77 | 1.03 | 1.23 | 1.00 |
| X020167 | BCG_2702C | 206 | 6  | 3  | 3  | 0.98 | 0.88 | 0.95 | 0.90 | 0.98 | 1.00 |
| X020167 | BCG_2704  | 129 | 5  | 2  | 2  | 1.08 | 1.05 | 0.98 | 0.98 | 0.91 | 1.00 |
| X020167 | BCG_2710C | 72  | 2  | 2  | 2  | 1.27 | 1.08 | 1.07 | 1.21 | 1.06 | 1.00 |
| X020167 | BCG_2713  | 70  | 4  | 2  | 2  | 1.02 | 1.06 | 0.93 | 1.18 | 0.87 | 1.00 |
| X020167 | BCG_2715  | 269 | 6  | 4  | 4  | 0.91 | 0.95 | 0.92 | 0.92 | 0.88 | 1.00 |
| X020167 | BCG_2716  | 687 | 17 | 10 | 10 | 1.63 | 0.97 | 1.08 | 1.02 | 1.14 | 1.00 |
| X020167 | BCG_2724  | 325 | 7  | 5  | 5  | 1.10 | 1.08 | 1.05 | 0.96 | 1.07 | 1.00 |
| X020167 | BCG_2731C | 180 | 4  | 2  | 2  | 1.19 | 1.07 | 1.01 | 1.05 | 0.90 | 1.00 |
| X020167 | BCG_2734C | 462 | 8  | 4  | 4  | 0.84 | 0.82 | 0.99 | 1.01 | 1.05 | 1.00 |
| X020167 | BCG_2744  | 412 | 14 | 9  | 9  | 0.72 | 0.89 | 0.83 | 0.94 | 0.88 | 1.00 |
| X020167 | BCG_2750C | 438 | 9  | 6  | 6  | 0.81 | 0.82 | 0.96 | 0.94 | 1.12 | 1.00 |
| X020167 | BCG_2759C | 260 | 5  | 4  | 4  | 0.97 | 0.92 | 1.04 | 1.14 | 1.11 | 1.00 |



|         |           |      |    |    |    |      |      |      |      |      |      |
|---------|-----------|------|----|----|----|------|------|------|------|------|------|
| X020167 | BCG_2760C | 1129 | 32 | 13 | 19 | 0.79 | 0.91 | 1.00 | 1.00 | 1.05 | 1.00 |
| X020167 | BCG_2767  | 306  | 9  | 3  | 3  | 1.16 | 0.87 | 1.04 | 1.04 | 1.15 | 1.00 |
| X020167 | BCG_2768C | 381  | 11 | 8  | 8  | 1.18 | 1.11 | 1.01 | 1.10 | 0.99 | 1.00 |
| X020167 | BCG_2769C | 215  | 8  | 2  | 2  | 1.38 | 1.15 | 1.11 | 1.14 | 0.97 | 1.00 |
| X020167 | BCG_2780C | 610  | 34 | 10 | 19 | 0.73 | 0.89 | 0.79 | 1.04 | 0.84 | 1.00 |
| X020167 | BCG_2781C | 116  | 2  | 2  | 2  | 0.93 | 0.83 | 0.84 | 0.94 | 1.00 | 1.00 |
| X020167 | BCG_2782  | 424  | 14 | 8  | 9  | 1.02 | 1.12 | 1.02 | 1.01 | 1.05 | 1.00 |
| X020167 | BCG_2795C | 142  | 5  | 3  | 3  | 1.33 | 1.44 | 1.28 | 1.30 | 1.36 | 1.00 |
| X020167 | BCG_2800C | 627  | 12 | 6  | 7  | 1.04 | 0.88 | 0.97 | 0.89 | 1.00 | 1.00 |
| X020167 | BCG_2801C | 1990 | 64 | 32 | 47 | 0.94 | 1.00 | 0.98 | 1.10 | 1.01 | 1.00 |
| X020167 | BCG_2803C | 252  | 10 | 5  | 6  | 0.84 | 0.86 | 0.90 | 0.96 | 0.87 | 1.00 |
| X020167 | BCG_2811C | 352  | 10 | 4  | 4  | 0.86 | 0.83 | 0.76 | 0.94 | 0.84 | 1.00 |
| X020167 | BCG_2813C | 87   | 3  | 2  | 2  | 0.97 | 1.05 | 0.89 | 1.32 | 0.72 | 1.00 |
| X020167 | BCG_2820C | 333  | 8  | 3  | 3  | 1.22 | 1.05 | 1.04 | 1.01 | 1.03 | 1.00 |
| X020167 | BCG_2851  | 247  | 5  | 2  | 2  | 1.22 | 1.41 | 1.21 | 1.05 | 0.96 | 1.00 |
| X020167 | BCG_2857C | 265  | 5  | 4  | 4  | 0.99 | 0.97 | 0.94 | 0.99 | 0.91 | 1.00 |
| X020167 | BCG_2858C | 223  | 4  | 2  | 2  | 1.20 | 1.18 | 1.17 | 1.13 | 1.02 | 1.00 |
| X020167 | BCG_2859C | 1103 | 30 | 20 | 22 | 2.62 | 0.98 | 1.11 | 0.97 | 1.08 | 1.00 |
| X020167 | BCG_2865C | 169  | 4  | 2  | 2  | 1.00 | 0.94 | 0.97 | 1.12 | 1.04 | 1.00 |
| X020167 | BCG_2872C | 65   | 3  | 2  | 2  | 1.10 | 1.09 | 1.14 | 0.96 | 0.92 | 1.00 |
| X020167 | BCG_2875  | 140  | 6  | 2  | 2  | 1.02 | 1.12 | 1.07 | 1.00 | 1.03 | 1.00 |
| X020167 | BCG_2882C | 1437 | 51 | 20 | 28 | 0.69 | 0.92 | 0.72 | 1.00 | 0.79 | 1.00 |
| X020167 | BCG_2883C | 210  | 5  | 4  | 4  | 0.93 | 0.91 | 0.96 | 0.89 | 1.19 | 1.00 |
| X020167 | BCG_2890C | 614  | 15 | 9  | 9  | 0.97 | 0.97 | 0.98 | 0.98 | 0.98 | 1.00 |
| X020167 | BCG_2901C | 150  | 3  | 2  | 2  | 0.93 | 0.90 | 0.87 | 0.99 | 0.99 | 1.00 |
| X020167 | BCG_2903C | 423  | 9  | 7  | 7  | 1.03 | 0.96 | 1.02 | 0.92 | 1.01 | 1.00 |
| X020167 | BCG_2904C | 237  | 6  | 2  | 3  | 0.98 | 1.00 | 1.00 | 0.96 | 1.02 | 1.00 |
| X020167 | BCG_2909C | 663  | 16 | 10 | 10 | 1.52 | 0.97 | 0.91 | 1.01 | 1.09 | 1.00 |
| X020167 | BCG_2910C | 1087 | 23 | 16 | 19 | 0.95 | 0.89 | 0.97 | 0.91 | 1.02 | 1.00 |
| X020167 | BCG_2911C | 830  | 30 | 16 | 19 | 0.92 | 0.99 | 0.92 | 1.04 | 1.04 | 1.00 |
| X020167 | BCG_2914  | 55   | 2  | 2  | 2  | 1.07 | 0.88 | 0.77 | 1.02 | 0.92 | 1.00 |
| X020167 | BCG_2924C | 99   | 3  | 3  | 3  | 0.97 | 1.00 | 0.89 | 1.05 | 0.85 | 1.00 |
| X020167 | BCG_2925C | 423  | 16 | 8  | 8  | 0.79 | 0.84 | 0.98 | 0.97 | 1.11 | 1.00 |
| X020167 | BCG_2929C | 319  | 10 | 5  | 5  | 0.88 | 1.06 | 0.99 | 1.07 | 0.97 | 1.00 |
| X020167 | BCG_2930C | 261  | 8  | 6  | 6  | 0.92 | 0.82 | 0.97 | 0.89 | 0.85 | 1.00 |
| X020167 | BCG_2937C | 492  | 13 | 6  | 6  | 1.04 | 0.94 | 0.92 | 0.92 | 0.97 | 1.00 |
| X020167 | BCG_2940C | 118  | 4  | 2  | 2  | 1.10 | 1.25 | 1.10 | 1.72 | 1.06 | 1.00 |
| X020167 | BCG_2942C | 514  | 12 | 8  | 8  | 0.95 | 1.04 | 1.02 | 0.96 | 1.02 | 1.00 |
| X020167 | BCG_2943C | 501  | 16 | 8  | 8  | 1.11 | 1.05 | 0.95 | 1.09 | 1.03 | 1.00 |
| X020167 | BCG_2947C | 147  | 4  | 2  | 2  | 0.87 | 1.04 | 0.94 | 0.94 | 0.99 | 1.00 |

|         |           |      |    |    |    |      |      |      |      |      |      |
|---------|-----------|------|----|----|----|------|------|------|------|------|------|
| X020167 | BCG_2949C | 682  | 16 | 9  | 9  | 0.69 | 0.80 | 0.87 | 0.83 | 0.91 | 1.00 |
| X020167 | BCG_2950  | 221  | 4  | 2  | 2  | 0.79 | 0.91 | 0.87 | 0.85 | 0.96 | 1.00 |
| X020167 | BCG_2952  | 158  | 7  | 2  | 2  | 1.12 | 0.94 | 0.96 | 0.97 | 1.11 | 1.00 |
| X020167 | BCG_2957  | 195  | 6  | 3  | 3  | 1.36 | 1.10 | 1.07 | 1.05 | 1.08 | 1.00 |
| X020167 | BCG_2958  | 149  | 4  | 3  | 3  | 0.81 | 0.71 | 0.77 | 0.70 | 0.92 | 1.00 |
| X020167 | BCG_2962C | 3037 | 78 | 52 | 53 | 0.98 | 0.96 | 1.01 | 1.02 | 1.05 | 1.00 |
| X020167 | BCG_2963  | 404  | 12 | 6  | 6  | 1.07 | 1.06 | 1.01 | 0.99 | 1.02 | 1.00 |
| X020167 | BCG_2964  | 416  | 12 | 5  | 6  | 1.24 | 1.08 | 1.06 | 1.12 | 1.09 | 1.00 |
| X020167 | BCG_2967C | 392  | 7  | 5  | 5  | 0.95 | 0.80 | 0.90 | 0.89 | 0.87 | 1.00 |
| X020167 | BCG_2968C | 934  | 23 | 16 | 16 | 1.08 | 0.98 | 0.97 | 0.99 | 1.02 | 1.00 |
| X020167 | BCG_2969C | 278  | 6  | 3  | 3  | 0.97 | 0.89 | 0.97 | 0.94 | 1.02 | 1.00 |
| X020167 | BCG_2970C | 278  | 6  | 4  | 4  | 1.07 | 1.00 | 0.97 | 0.94 | 1.10 | 1.00 |
| X020167 | BCG_2972C | 529  | 12 | 9  | 9  | 1.03 | 0.93 | 0.98 | 0.95 | 1.14 | 1.00 |
| X020167 | BCG_2973  | 174  | 5  | 4  | 4  | 1.00 | 0.95 | 0.97 | 0.95 | 1.03 | 1.00 |
| X020167 | BCG_2974  | 348  | 10 | 5  | 6  | 0.97 | 0.85 | 0.88 | 0.93 | 1.06 | 1.00 |
| X020167 | BCG_2976C | 276  | 7  | 5  | 5  | 1.20 | 1.03 | 0.95 | 0.97 | 1.01 | 1.00 |
| X020167 | BCG_2980C | 200  | 6  | 3  | 3  | 1.05 | 1.21 | 1.14 | 1.14 | 1.00 | 1.00 |
| X020167 | BCG_2985  | 535  | 15 | 10 | 12 | 0.93 | 1.08 | 0.85 | 1.06 | 0.90 | 1.00 |
| X020167 | BCG_2988C | 558  | 17 | 8  | 8  | 1.13 | 1.10 | 1.12 | 1.05 | 1.14 | 1.00 |
| X020167 | BCG_2990C | 419  | 12 | 9  | 9  | 0.96 | 0.92 | 1.00 | 1.03 | 1.03 | 1.00 |
| X020167 | BCG_2991C | 316  | 7  | 4  | 4  | 1.03 | 1.00 | 0.96 | 0.96 | 0.93 | 1.00 |
| X020167 | BCG_2993  | 603  | 10 | 6  | 7  | 0.87 | 0.82 | 1.00 | 0.86 | 1.08 | 1.00 |
| X020167 | BCG_3002C | 411  | 9  | 8  | 8  | 0.79 | 0.93 | 0.75 | 0.98 | 0.83 | 1.00 |
| X020167 | BCG_3005  | 346  | 8  | 4  | 4  | 0.96 | 0.84 | 0.98 | 1.01 | 0.99 | 1.00 |
| X020167 | BCG_3006  | 328  | 10 | 6  | 6  | 0.96 | 0.97 | 0.88 | 0.87 | 0.92 | 1.00 |
| X020167 | BCG_3008C | 567  | 12 | 10 | 10 | 1.01 | 1.18 | 1.02 | 1.00 | 1.09 | 1.00 |
| X020167 | BCG_3009C | 546  | 13 | 9  | 10 | 1.01 | 0.91 | 0.98 | 0.99 | 1.03 | 1.00 |
| X020167 | BCG_3010  | 805  | 18 | 12 | 13 | 1.38 | 0.86 | 1.26 | 0.92 | 0.92 | 1.00 |
| X020167 | BCG_3013C | 220  | 5  | 3  | 3  | 0.88 | 0.98 | 0.93 | 0.94 | 0.99 | 1.00 |
| X020167 | BCG_3014C | 202  | 6  | 3  | 3  | 0.97 | 0.91 | 0.98 | 0.95 | 1.05 | 1.00 |
| X020167 | BCG_3016C | 290  | 7  | 3  | 3  | 1.12 | 1.21 | 1.12 | 1.24 | 1.16 | 1.00 |
| X020167 | BCG_3017C | 982  | 19 | 13 | 14 | 0.96 | 1.00 | 1.05 | 1.05 | 1.07 | 1.00 |
| X020167 | BCG_3023C | 418  | 9  | 6  | 6  | 0.93 | 0.81 | 0.98 | 0.89 | 1.03 | 1.00 |
| X020167 | BCG_3024C | 168  | 5  | 2  | 2  | 1.30 | 1.31 | 1.18 | 1.18 | 1.10 | 1.00 |
| X020167 | BCG_3025C | 76   | 5  | 2  | 2  | 0.92 | 1.02 | 1.03 | 1.08 | 0.92 | 1.00 |
| X020167 | BCG_3027C | 73   | 2  | 2  | 2  | 1.19 | 0.99 | 0.97 | 1.00 | 1.16 | 1.00 |
| X020167 | BCG_3031C | 484  | 14 | 8  | 8  | 0.97 | 1.02 | 1.00 | 1.05 | 1.03 | 1.00 |
| X020167 | BCG_3032C | 181  | 5  | 4  | 4  | 0.99 | 0.98 | 1.02 | 1.01 | 1.11 | 1.00 |
| X020167 | BCG_3033C | 300  | 8  | 4  | 4  | 0.98 | 1.02 | 0.97 | 0.97 | 0.99 | 1.00 |
| X020167 | BCG_3051C | 432  | 11 | 8  | 8  | 0.96 | 0.90 | 0.97 | 0.92 | 1.00 | 1.00 |

|         |           |     |    |    |    |      |      |      |      |      |      |
|---------|-----------|-----|----|----|----|------|------|------|------|------|------|
| X020167 | BCG_3052C | 475 | 16 | 8  | 8  | 0.93 | 0.88 | 1.00 | 0.87 | 1.08 | 1.00 |
| X020167 | BCG_3054  | 449 | 9  | 6  | 6  | 1.17 | 1.08 | 1.06 | 1.06 | 1.07 | 1.00 |
| X020167 | BCG_3056  | 148 | 3  | 2  | 2  | 1.12 | 0.98 | 0.94 | 1.14 | 1.22 | 1.00 |
| X020167 | BCG_3058C | 315 | 8  | 6  | 6  | 0.90 | 1.09 | 0.96 | 1.02 | 1.01 | 1.00 |
| X020167 | BCG_3066C | 294 | 6  | 5  | 5  | 1.07 | 0.96 | 0.96 | 0.94 | 1.01 | 1.00 |
| X020167 | BCG_3067C | 127 | 9  | 2  | 2  | 0.97 | 1.13 | 0.86 | 1.06 | 0.90 | 1.00 |
| X020167 | BCG_3069  | 545 | 12 | 8  | 10 | 0.84 | 0.89 | 0.95 | 0.95 | 0.97 | 1.00 |
| X020167 | BCG_3072C | 292 | 9  | 5  | 5  | 0.98 | 1.00 | 0.95 | 1.00 | 1.03 | 1.00 |
| X020167 | BCG_3074C | 378 | 12 | 7  | 7  | 0.90 | 0.75 | 0.92 | 0.74 | 0.95 | 1.00 |
| X020167 | BCG_3075C | 517 | 18 | 7  | 7  | 1.03 | 0.90 | 0.94 | 0.95 | 1.02 | 1.00 |
| X020167 | BCG_3079C | 167 | 4  | 4  | 4  | 0.89 | 0.84 | 0.88 | 0.85 | 1.07 | 1.00 |
| X020167 | BCG_3082C | 168 | 5  | 4  | 4  | 1.03 | 0.99 | 0.97 | 1.04 | 1.12 | 1.00 |
| X020167 | BCG_3100C | 567 | 11 | 8  | 8  | 0.96 | 0.89 | 0.98 | 0.94 | 1.11 | 1.00 |
| X020167 | BCG_3107C | 90  | 3  | 2  | 2  | 1.09 | 1.18 | 0.85 | 0.94 | 0.93 | 1.00 |
| X020167 | BCG_3115  | 232 | 6  | 4  | 4  | 0.95 | 1.04 | 1.10 | 1.07 | 1.12 | 1.00 |
| X020167 | BCG_3116  | 411 | 10 | 7  | 8  | 1.10 | 1.04 | 1.10 | 1.20 | 1.15 | 1.00 |
| X020167 | BCG_3118C | 299 | 7  | 5  | 5  | 1.25 | 1.04 | 1.01 | 1.22 | 1.19 | 1.00 |
| X020167 | BCG_3124C | 219 | 6  | 4  | 4  | 0.97 | 0.91 | 1.03 | 0.95 | 1.10 | 1.00 |
| X020167 | BCG_3126C | 180 | 7  | 4  | 4  | 0.90 | 0.91 | 0.98 | 0.95 | 0.99 | 1.00 |
| X020167 | BCG_3127C | 600 | 13 | 8  | 9  | 1.08 | 0.86 | 1.03 | 0.91 | 1.02 | 1.00 |
| X020167 | BCG_3130C | 144 | 5  | 4  | 4  | 0.99 | 0.84 | 0.94 | 0.86 | 1.03 | 1.00 |
| X020167 | BCG_3131  | 77  | 3  | 2  | 2  | 1.28 | 1.14 | 1.03 | 1.00 | 0.92 | 1.00 |
| X020167 | BCG_3142  | 689 | 24 | 15 | 18 | 0.96 | 0.98 | 1.08 | 1.00 | 1.08 | 1.00 |
| X020167 | BCG_3153C | 180 | 7  | 3  | 3  | 1.02 | 0.88 | 0.95 | 0.98 | 1.11 | 1.00 |
| X020167 | BCG_3156C | 188 | 5  | 4  | 4  | 0.94 | 0.96 | 0.97 | 0.99 | 0.93 | 1.00 |
| X020167 | BCG_3158  | 65  | 4  | 2  | 4  | 1.02 | 1.27 | 1.16 | 1.13 | 1.11 | 1.00 |
| X020167 | BCG_3160  | 194 | 5  | 3  | 3  | 0.95 | 0.80 | 0.89 | 0.89 | 0.97 | 1.00 |
| X020167 | BCG_3162  | 466 | 9  | 7  | 7  | 1.00 | 0.85 | 1.03 | 0.95 | 1.22 | 1.00 |
| X020167 | BCG_3163  | 739 | 18 | 12 | 14 | 0.90 | 0.98 | 1.03 | 1.04 | 1.10 | 1.00 |
| X020167 | BCG_3164  | 113 | 3  | 2  | 2  | 1.09 | 1.31 | 1.08 | 1.00 | 1.06 | 1.00 |
| X020167 | BCG_3166  | 57  | 2  | 2  | 2  | 1.18 | 1.30 | 1.20 | 1.32 | 1.13 | 1.00 |
| X020167 | BCG_3169  | 174 | 5  | 3  | 3  | 0.89 | 0.82 | 0.81 | 0.90 | 0.89 | 1.00 |
| X020167 | BCG_3170  | 94  | 2  | 2  | 2  | 0.92 | 0.90 | 0.98 | 0.96 | 1.09 | 1.00 |
| X020167 | BCG_3171  | 195 | 4  | 4  | 4  | 0.72 | 0.75 | 0.73 | 0.87 | 0.86 | 1.00 |
| X020167 | BCG_3172  | 186 | 4  | 2  | 2  | 0.92 | 0.87 | 0.97 | 0.96 | 0.99 | 1.00 |
| X020167 | BCG_3173  | 193 | 7  | 2  | 2  | 0.92 | 0.92 | 0.99 | 0.98 | 1.12 | 1.00 |
| X020167 | BCG_3174  | 294 | 9  | 5  | 5  | 1.01 | 0.89 | 1.01 | 0.95 | 0.94 | 1.00 |
| X020167 | BCG_3175  | 162 | 3  | 3  | 3  | 0.81 | 0.82 | 1.03 | 0.99 | 1.23 | 1.00 |
| X020167 | BCG_3176  | 137 | 4  | 4  | 4  | 0.86 | 0.95 | 1.08 | 0.85 | 1.11 | 1.00 |
| X020167 | BCG_3179  | 139 | 5  | 2  | 3  | 0.91 | 1.09 | 0.99 | 0.98 | 0.93 | 1.00 |

|         |           |      |    |    |    |      |      |      |      |      |      |
|---------|-----------|------|----|----|----|------|------|------|------|------|------|
| X020167 | BCG_3181  | 122  | 3  | 2  | 3  | 1.02 | 0.92 | 1.05 | 1.05 | 1.01 | 1.00 |
| X020167 | BCG_3185C | 498  | 12 | 10 | 10 | 1.03 | 0.96 | 1.04 | 1.01 | 1.07 | 1.00 |
| X020167 | BCG_3215C | 1114 | 28 | 16 | 16 | 1.07 | 1.00 | 1.09 | 1.11 | 1.13 | 1.00 |
| X020167 | BCG_3223  | 180  | 4  | 3  | 3  | 0.99 | 0.96 | 0.93 | 0.92 | 1.04 | 1.00 |
| X020167 | BCG_3225C | 356  | 11 | 5  | 5  | 0.86 | 0.97 | 0.93 | 0.92 | 0.93 | 1.00 |
| X020167 | BCG_3232C | 315  | 7  | 2  | 2  | 0.97 | 0.93 | 0.99 | 0.99 | 1.04 | 1.00 |
| X020167 | BCG_3233C | 142  | 5  | 3  | 3  | 1.02 | 1.06 | 0.99 | 1.08 | 1.01 | 1.00 |
| X020167 | BCG_3234  | 103  | 5  | 2  | 2  | 1.10 | 0.93 | 1.20 | 1.10 | 1.49 | 1.00 |
| X020167 | BCG_3235C | 209  | 3  | 2  | 2  | 0.96 | 0.90 | 1.01 | 1.00 | 1.13 | 1.00 |
| X020167 | BCG_3238  | 845  | 21 | 14 | 15 | 0.87 | 0.99 | 0.86 | 1.04 | 0.84 | 1.00 |
| X020167 | BCG_3240C | 227  | 9  | 6  | 6  | 0.92 | 0.88 | 0.99 | 1.06 | 1.06 | 1.00 |
| X020167 | BCG_3251C | 372  | 10 | 6  | 7  | 0.89 | 0.87 | 0.93 | 0.94 | 1.06 | 1.00 |
| X020167 | BCG_3252  | 796  | 28 | 14 | 19 | 1.05 | 1.07 | 1.05 | 1.00 | 1.10 | 1.00 |
| X020167 | BCG_3255C | 252  | 8  | 6  | 6  | 0.94 | 1.13 | 0.76 | 0.96 | 0.87 | 1.00 |
| X020167 | BCG_3259C | 238  | 8  | 2  | 2  | 0.94 | 0.95 | 0.84 | 0.94 | 0.93 | 1.00 |
| X020167 | BCG_3269C | 1001 | 24 | 15 | 16 | 1.75 | 0.92 | 1.02 | 0.94 | 1.05 | 1.00 |
| X020167 | BCG_3270C | 212  | 4  | 4  | 4  | 0.72 | 0.88 | 1.02 | 0.90 | 1.07 | 1.00 |
| X020167 | BCG_3275C | 355  | 8  | 5  | 7  | 0.88 | 0.86 | 1.00 | 0.88 | 1.02 | 1.00 |
| X020167 | BCG_3277C | 967  | 30 | 18 | 21 | 0.99 | 0.92 | 1.07 | 1.02 | 1.06 | 1.00 |
| X020167 | BCG_3285C | 250  | 7  | 3  | 3  | 0.93 | 0.99 | 0.87 | 0.93 | 0.97 | 1.00 |
| X020167 | BCG_3286C | 75   | 2  | 2  | 2  | 1.16 | 1.18 | 1.11 | 1.08 | 1.04 | 1.00 |
| X020167 | BCG_3293C | 371  | 9  | 5  | 5  | 0.93 | 0.89 | 0.87 | 0.94 | 0.97 | 1.00 |
| X020167 | BCG_3294C | 169  | 4  | 2  | 2  | 1.00 | 0.90 | 0.99 | 1.03 | 1.12 | 1.00 |
| X020167 | BCG_3297  | 104  | 4  | 2  | 2  | 0.98 | 1.21 | 1.09 | 1.03 | 0.83 | 1.00 |
| X020167 | BCG_3298  | 286  | 7  | 5  | 7  | 0.95 | 0.94 | 1.08 | 1.11 | 1.14 | 1.00 |
| X020167 | BCG_3299  | 413  | 14 | 8  | 9  | 0.96 | 0.91 | 1.04 | 1.01 | 1.05 | 1.00 |
| X020167 | BCG_3302  | 406  | 8  | 5  | 5  | 0.87 | 0.85 | 1.01 | 0.93 | 1.09 | 1.00 |
| X020167 | BCG_3303C | 579  | 17 | 10 | 10 | 0.89 | 0.94 | 1.00 | 0.99 | 1.05 | 1.00 |
| X020167 | BCG_3304C | 105  | 3  | 2  | 2  | 1.14 | 1.15 | 1.14 | 1.05 | 1.07 | 1.00 |
| X020167 | BCG_3305C | 1643 | 69 | 21 | 38 | 0.83 | 0.93 | 0.76 | 1.01 | 0.81 | 1.00 |
| X020167 | BCG_3309  | 1360 | 52 | 23 | 39 | 0.66 | 0.81 | 0.67 | 0.94 | 0.80 | 1.00 |
| X020167 | BCG_3310  | 188  | 7  | 4  | 4  | 1.00 | 0.97 | 0.92 | 1.33 | 0.92 | 1.00 |
| X020167 | BCG_3312  | 392  | 12 | 9  | 9  | 0.90 | 0.87 | 0.92 | 0.90 | 0.95 | 1.00 |
| X020167 | BCG_3314  | 2272 | 63 | 29 | 38 | 0.78 | 0.93 | 0.70 | 0.99 | 0.80 | 1.00 |
| X020167 | BCG_3321  | 139  | 5  | 3  | 3  | 1.18 | 1.16 | 1.01 | 1.01 | 1.14 | 1.00 |
| X020167 | BCG_3322  | 147  | 5  | 3  | 3  | 0.91 | 0.96 | 0.87 | 0.95 | 0.87 | 1.00 |
| X020167 | BCG_3324  | 325  | 9  | 3  | 3  | 1.03 | 0.78 | 0.86 | 0.85 | 0.99 | 1.00 |
| X020167 | BCG_3325  | 228  | 8  | 3  | 3  | 1.23 | 0.93 | 0.96 | 1.20 | 1.04 | 1.00 |
| X020167 | BCG_3334  | 147  | 3  | 2  | 2  | 1.05 | 1.18 | 1.02 | 1.13 | 1.01 | 1.00 |
| X020167 | BCG_3335  | 201  | 5  | 3  | 3  | 0.95 | 0.71 | 0.78 | 0.89 | 0.93 | 1.00 |

|         |           |      |    |    |    |      |      |      |      |      |      |
|---------|-----------|------|----|----|----|------|------|------|------|------|------|
| X020167 | BCG_3340C | 503  | 16 | 8  | 9  | 0.96 | 1.07 | 1.01 | 1.00 | 1.07 | 1.00 |
| X020167 | BCG_3349C | 182  | 5  | 2  | 2  | 0.98 | 0.97 | 1.09 | 1.00 | 1.14 | 1.00 |
| X020167 | BCG_3366C | 276  | 7  | 2  | 2  | 0.88 | 0.86 | 0.77 | 0.77 | 0.91 | 1.00 |
| X020167 | BCG_3367C | 325  | 10 | 6  | 7  | 1.22 | 1.02 | 1.06 | 1.06 | 1.10 | 1.00 |
| X020167 | BCG_3376  | 291  | 8  | 6  | 6  | 0.85 | 0.88 | 1.00 | 0.93 | 0.98 | 1.00 |
| X020167 | BCG_3384  | 215  | 8  | 3  | 3  | 1.15 | 0.92 | 1.03 | 0.98 | 1.11 | 1.00 |
| X020167 | BCG_3410  | 85   | 4  | 2  | 2  | 1.23 | 1.19 | 0.97 | 1.14 | 0.96 | 1.00 |
| X020167 | BCG_3440C | 99   | 3  | 2  | 2  | 1.05 | 1.18 | 1.12 | 1.09 | 1.33 | 1.00 |
| X020167 | BCG_3441  | 116  | 4  | 3  | 3  | 0.65 | 0.88 | 0.88 | 0.83 | 0.96 | 1.00 |
| X020167 | BCG_3445  | 255  | 7  | 4  | 4  | 1.00 | 0.92 | 1.01 | 0.96 | 0.96 | 1.00 |
| X020167 | BCG_3453C | 206  | 4  | 3  | 3  | 1.01 | 0.89 | 1.05 | 1.07 | 1.03 | 1.00 |
| X020167 | BCG_3458C | 551  | 10 | 9  | 9  | 1.01 | 1.03 | 1.03 | 0.95 | 1.03 | 1.00 |
| X020167 | BCG_3461C | 131  | 3  | 2  | 2  | 0.87 | 0.89 | 0.93 | 0.81 | 0.98 | 1.00 |
| X020167 | BCG_3466C | 194  | 8  | 3  | 3  | 1.00 | 1.03 | 1.00 | 1.05 | 1.17 | 1.00 |
| X020167 | BCG_3469  | 285  | 6  | 4  | 4  | 1.01 | 1.00 | 0.95 | 0.95 | 1.06 | 1.00 |
| X020167 | BCG_3470  | 229  | 6  | 5  | 5  | 1.03 | 0.93 | 0.94 | 0.96 | 1.00 | 1.00 |
| X020167 | BCG_3471  | 586  | 15 | 11 | 12 | 0.98 | 1.07 | 1.08 | 1.11 | 1.12 | 1.00 |
| X020167 | BCG_3479C | 315  | 9  | 4  | 4  | 1.31 | 1.38 | 1.04 | 1.21 | 1.15 | 1.00 |
| X020167 | BCG_3480C | 248  | 5  | 3  | 3  | 0.95 | 0.96 | 0.78 | 1.07 | 1.07 | 1.00 |
| X020167 | BCG_3481C | 1704 | 48 | 27 | 40 | 0.77 | 0.82 | 0.93 | 0.95 | 1.02 | 1.00 |
| X020167 | BCG_3487C | 1571 | 39 | 22 | 26 | 1.10 | 0.87 | 1.05 | 0.96 | 1.08 | 1.00 |
| X020167 | BCG_3488C | 659  | 27 | 9  | 22 | 0.85 | 0.84 | 1.01 | 0.95 | 1.15 | 1.00 |
| X020167 | BCG_3502C | 231  | 5  | 3  | 3  | 1.01 | 0.89 | 0.96 | 0.93 | 0.99 | 1.00 |
| X020167 | BCG_3507C | 182  | 5  | 3  | 3  | 1.17 | 0.96 | 0.92 | 0.99 | 0.97 | 1.00 |
| X020167 | BCG_3508C | 483  | 18 | 10 | 13 | 0.71 | 0.73 | 0.85 | 0.88 | 0.95 | 1.00 |
| X020167 | BCG_3509C | 309  | 17 | 7  | 11 | 0.90 | 0.94 | 1.01 | 1.00 | 0.94 | 1.00 |
| X020167 | BCG_3521C | 545  | 17 | 12 | 14 | 0.96 | 0.92 | 1.01 | 0.97 | 0.91 | 1.00 |
| X020167 | BCG_3522C | 1015 | 35 | 16 | 21 | 0.73 | 0.80 | 0.91 | 0.93 | 0.98 | 1.00 |
| X020167 | BCG_3523C | 821  | 29 | 13 | 21 | 0.77 | 0.88 | 0.90 | 0.94 | 0.87 | 1.00 |
| X020167 | BCG_3524C | 281  | 12 | 6  | 9  | 0.67 | 0.74 | 0.89 | 0.73 | 0.99 | 1.00 |
| X020167 | BCG_3525C | 628  | 27 | 12 | 14 | 0.74 | 0.83 | 0.86 | 0.94 | 0.89 | 1.00 |
| X020167 | BCG_3527C | 122  | 4  | 2  | 3  | 0.95 | 0.95 | 1.12 | 0.91 | 1.18 | 1.00 |
| X020167 | BCG_3550  | 118  | 2  | 2  | 2  | 1.01 | 1.04 | 1.05 | 1.01 | 0.93 | 1.00 |
| X020167 | BCG_3554  | 176  | 5  | 3  | 3  | 1.20 | 0.94 | 1.05 | 0.99 | 0.99 | 1.00 |
| X020167 | BCG_3557C | 156  | 3  | 2  | 2  | 1.44 | 1.26 | 1.10 | 1.07 | 1.01 | 1.00 |
| X020167 | BCG_3573C | 479  | 11 | 8  | 8  | 1.08 | 1.06 | 1.06 | 1.05 | 1.01 | 1.00 |
| X020167 | BCG_3583  | 359  | 12 | 7  | 9  | 1.16 | 0.94 | 1.07 | 0.97 | 1.14 | 1.00 |
| X020167 | BCG_3584C | 246  | 5  | 2  | 2  | 1.16 | 1.18 | 0.99 | 0.91 | 1.13 | 1.00 |
| X020167 | BCG_3592C | 218  | 7  | 5  | 5  | 1.94 | 0.89 | 1.47 | 0.93 | 1.03 | 1.00 |
| X020167 | BCG_3611  | 195  | 6  | 4  | 4  | 1.07 | 1.01 | 1.02 | 0.93 | 1.15 | 1.00 |

|         |           |      |    |    |    |      |      |      |      |      |      |
|---------|-----------|------|----|----|----|------|------|------|------|------|------|
| X020167 | BCG_3633C | 92   | 6  | 2  | 2  | 1.12 | 1.01 | 1.03 | 0.97 | 1.09 | 1.00 |
| X020167 | BCG_3635C | 328  | 8  | 2  | 2  | 0.72 | 0.80 | 0.92 | 0.91 | 1.16 | 1.00 |
| X020167 | BCG_3648C | 521  | 12 | 9  | 9  | 0.97 | 0.95 | 1.02 | 0.97 | 1.05 | 1.00 |
| X020167 | BCG_3649  | 331  | 7  | 5  | 5  | 0.85 | 0.89 | 1.00 | 0.90 | 1.02 | 1.00 |
| X020167 | BCG_3652C | 185  | 3  | 2  | 2  | 0.82 | 0.79 | 1.11 | 0.94 | 1.16 | 1.00 |
| X020167 | BCG_3653C | 240  | 7  | 3  | 3  | 1.03 | 1.15 | 0.97 | 0.96 | 0.90 | 1.00 |
| X020167 | BCG_3661C | 1324 | 35 | 14 | 15 | 1.07 | 0.91 | 1.08 | 1.09 | 1.19 | 1.00 |
| X020167 | BCG_3662C | 177  | 5  | 4  | 4  | 1.03 | 1.13 | 0.96 | 0.93 | 0.94 | 1.00 |
| X020167 | BCG_3663C | 93   | 4  | 2  | 2  | 0.84 | 0.85 | 0.98 | 0.90 | 0.89 | 1.00 |
| X020167 | BCG_3674C | 348  | 12 | 8  | 8  | 0.96 | 0.83 | 0.99 | 1.00 | 0.96 | 1.00 |
| X020167 | BCG_3678C | 113  | 3  | 2  | 2  | 0.97 | 1.03 | 0.90 | 0.96 | 0.94 | 1.00 |
| X020167 | BCG_3680C | 183  | 4  | 2  | 2  | 0.81 | 0.72 | 1.04 | 0.90 | 1.14 | 1.00 |
| X020167 | BCG_3685C | 104  | 2  | 2  | 2  | 1.42 | 1.39 | 0.97 | 1.09 | 0.96 | 1.00 |
| X020167 | BCG_3686  | 321  | 8  | 5  | 5  | 1.05 | 0.95 | 1.05 | 0.98 | 1.02 | 1.00 |
| X020167 | BCG_3704C | 1383 | 41 | 22 | 24 | 1.19 | 0.97 | 0.98 | 1.00 | 0.98 | 1.00 |
| X020167 | BCG_3706C | 254  | 11 | 5  | 8  | 0.98 | 1.00 | 1.10 | 1.16 | 1.08 | 1.00 |
| X020167 | BCG_3727  | 103  | 4  | 4  | 4  | 0.88 | 0.99 | 1.05 | 0.98 | 1.04 | 1.00 |
| X020167 | BCG_3729C | 256  | 8  | 4  | 4  | 0.97 | 0.92 | 0.89 | 0.97 | 0.93 | 1.00 |
| X020167 | BCG_3734  | 454  | 10 | 7  | 7  | 1.14 | 1.11 | 1.13 | 1.09 | 1.05 | 1.00 |
| X020167 | BCG_3738  | 98   | 3  | 2  | 2  | 0.75 | 1.20 | 0.86 | 0.83 | 0.95 | 1.00 |
| X020167 | BCG_3742  | 79   | 3  | 2  | 2  | 1.45 | 1.08 | 1.02 | 1.10 | 1.21 | 1.00 |
| X020167 | BCG_3747C | 287  | 6  | 5  | 5  | 0.87 | 0.89 | 0.93 | 0.90 | 0.94 | 1.00 |
| X020167 | BCG_3751  | 206  | 4  | 2  | 2  | 1.06 | 1.09 | 1.01 | 0.95 | 1.10 | 1.00 |
| X020167 | BCG_3752  | 244  | 8  | 4  | 4  | 1.04 | 1.12 | 0.99 | 1.28 | 1.00 | 1.00 |
| X020167 | BCG_3768C | 221  | 5  | 3  | 3  | 0.98 | 0.98 | 1.01 | 0.89 | 1.02 | 1.00 |
| X020167 | BCG_3769C | 428  | 10 | 6  | 6  | 1.08 | 1.12 | 1.07 | 0.99 | 1.07 | 1.00 |
| X020167 | BCG_3770  | 610  | 19 | 14 | 14 | 1.00 | 1.02 | 1.03 | 1.02 | 1.02 | 1.00 |
| X020167 | BCG_3776C | 162  | 4  | 3  | 3  | 0.91 | 0.83 | 1.00 | 1.01 | 1.07 | 1.00 |
| X020167 | BCG_3778C | 160  | 5  | 2  | 2  | 0.92 | 0.92 | 1.05 | 0.94 | 1.06 | 1.00 |
| X020167 | BCG_3780  | 573  | 12 | 7  | 8  | 1.11 | 0.94 | 0.98 | 0.95 | 1.10 | 1.00 |
| X020167 | BCG_3782C | 258  | 10 | 6  | 6  | 0.99 | 0.97 | 1.04 | 0.94 | 1.27 | 1.00 |
| X020167 | BCG_3794C | 241  | 5  | 3  | 3  | 1.27 | 1.26 | 1.06 | 1.10 | 0.97 | 1.00 |
| X020167 | BCG_3806  | 253  | 6  | 3  | 4  | 1.10 | 1.08 | 1.04 | 0.99 | 1.08 | 1.00 |
| X020167 | BCG_3820C | 205  | 5  | 4  | 4  | 1.11 | 0.98 | 1.00 | 0.95 | 1.01 | 1.00 |
| X020167 | BCG_3822  | 155  | 5  | 2  | 2  | 0.83 | 0.82 | 0.94 | 0.92 | 0.98 | 1.00 |
| X020167 | BCG_3836  | 527  | 11 | 8  | 9  | 0.83 | 0.82 | 0.95 | 0.90 | 1.01 | 1.00 |
| X020167 | BCG_3837  | 204  | 10 | 5  | 5  | 1.24 | 1.14 | 1.06 | 1.04 | 1.05 | 1.00 |
| X020167 | BCG_3840C | 135  | 3  | 2  | 2  | 1.24 | 1.17 | 0.98 | 1.12 | 1.04 | 1.00 |
| X020167 | BCG_3842  | 305  | 9  | 5  | 5  | 1.00 | 0.98 | 1.08 | 1.05 | 1.19 | 1.00 |
| X020167 | BCG_3844  | 405  | 11 | 7  | 7  | 1.15 | 0.96 | 1.07 | 1.12 | 1.10 | 1.00 |

|         |           |      |    |    |    |      |      |      |      |      |      |
|---------|-----------|------|----|----|----|------|------|------|------|------|------|
| X020167 | BCG_3853  | 432  | 9  | 7  | 8  | 0.87 | 0.78 | 0.95 | 0.86 | 1.08 | 1.00 |
| X020167 | BCG_3857  | 440  | 14 | 8  | 8  | 1.00 | 1.00 | 1.10 | 1.07 | 1.12 | 1.00 |
| X020167 | BCG_3861C | 1485 | 43 | 19 | 30 | 0.76 | 0.96 | 0.76 | 1.01 | 0.84 | 1.00 |
| X020167 | BCG_3862C | 978  | 29 | 21 | 21 | 0.95 | 0.92 | 1.01 | 0.99 | 1.07 | 1.00 |
| X020167 | BCG_3863C | 1037 | 22 | 17 | 17 | 1.00 | 0.98 | 1.08 | 0.99 | 1.15 | 1.00 |
| X020167 | BCG_3864C | 236  | 7  | 3  | 3  | 1.04 | 1.00 | 1.07 | 1.01 | 1.29 | 1.00 |
| X020167 | BCG_3866C | 279  | 9  | 5  | 5  | 1.05 | 1.04 | 0.99 | 1.01 | 0.96 | 1.00 |
| X020167 | BCG_3867C | 298  | 8  | 5  | 5  | 1.16 | 1.10 | 1.14 | 1.21 | 1.06 | 1.00 |
| X020167 | BCG_3868C | 207  | 5  | 3  | 3  | 1.01 | 0.91 | 1.25 | 1.04 | 1.32 | 1.00 |
| X020167 | BCG_3870C | 334  | 11 | 7  | 7  | 0.99 | 0.89 | 0.95 | 1.10 | 0.95 | 1.00 |
| X020167 | BCG_3876C | 145  | 4  | 2  | 2  | 0.98 | 0.98 | 1.05 | 1.07 | 1.05 | 1.00 |
| X020167 | BCG_3877C | 90   | 3  | 2  | 2  | 1.21 | 1.17 | 0.96 | 1.16 | 0.83 | 1.00 |
| X020167 | BCG_3878C | 517  | 12 | 8  | 8  | 1.23 | 1.20 | 1.12 | 1.17 | 1.11 | 1.00 |
| X020167 | BCG_3879  | 511  | 11 | 7  | 7  | 1.04 | 1.06 | 0.75 | 1.08 | 1.08 | 1.00 |
| X020167 | BCG_3880  | 305  | 8  | 5  | 5  | 1.08 | 1.02 | 1.02 | 1.05 | 1.17 | 1.00 |
| X020167 | BCG_3881  | 421  | 17 | 10 | 13 | 0.96 | 0.97 | 0.90 | 0.94 | 1.03 | 1.00 |
| X020167 | BCG_3897C | 146  | 3  | 2  | 2  | 1.15 | 1.02 | 0.99 | 1.06 | 0.96 | 1.00 |
| X020167 | BCG_3901C | 291  | 6  | 2  | 2  | 0.81 | 0.80 | 1.02 | 0.87 | 0.97 | 1.00 |
| X020167 | BCG_3904  | 317  | 10 | 6  | 6  | 0.84 | 0.87 | 0.98 | 0.95 | 1.02 | 1.00 |
| X020167 | BCG_3905C | 96   | 4  | 2  | 2  | 1.50 | 1.03 | 1.61 | 0.95 | 0.96 | 1.00 |
| X020167 | BCG_3906C | 122  | 6  | 2  | 2  | 0.98 | 1.00 | 0.93 | 1.01 | 0.91 | 1.00 |
| X020167 | BCG_3909  | 257  | 7  | 5  | 5  | 0.88 | 0.83 | 0.97 | 0.86 | 1.02 | 1.00 |
| X020167 | BCG_3912  | 246  | 7  | 5  | 6  | 0.93 | 0.99 | 0.89 | 0.93 | 0.92 | 1.00 |
| X020167 | BCG_3915  | 241  | 7  | 4  | 4  | 1.54 | 0.83 | 1.06 | 0.96 | 0.99 | 1.00 |
| X020167 | BCG_3921C | 256  | 7  | 5  | 5  | 0.99 | 0.97 | 1.00 | 1.10 | 1.03 | 1.00 |
| X020167 | BCG_3922C | 400  | 12 | 5  | 5  | 1.20 | 0.97 | 1.00 | 1.27 | 1.04 | 1.00 |
| X020167 | BCG_3927  | 257  | 9  | 6  | 8  | 0.92 | 0.88 | 0.97 | 0.97 | 1.04 | 1.00 |
| X020167 | BCG_3928  | 202  | 5  | 4  | 4  | 0.79 | 0.78 | 0.85 | 0.83 | 0.89 | 1.00 |
| X020167 | BCG_3930  | 71   | 2  | 2  | 2  | 0.99 | 1.01 | 1.01 | 1.02 | 1.12 | 1.00 |
| X020167 | BCG_3931  | 592  | 13 | 9  | 10 | 1.05 | 1.05 | 1.02 | 1.04 | 1.02 | 1.00 |
| X020167 | BCG_3935C | 314  | 5  | 3  | 3  | 1.13 | 1.22 | 1.16 | 1.22 | 1.14 | 1.00 |
| X020167 | BCG_3936C | 403  | 9  | 5  | 5  | 0.80 | 0.83 | 0.99 | 0.92 | 1.01 | 1.00 |
| X020167 | BCG_3964C | 165  | 4  | 2  | 2  | 1.13 | 1.09 | 1.02 | 1.00 | 1.04 | 1.00 |
| X020167 | BCG_3967  | 178  | 5  | 3  | 3  | 1.09 | 1.07 | 1.05 | 1.01 | 0.87 | 1.00 |
| X020167 | BCG_3971  | 195  | 5  | 3  | 3  | 0.98 | 1.01 | 0.84 | 0.85 | 0.96 | 1.00 |
| X020167 | BCG_3972  | 320  | 13 | 6  | 7  | 0.68 | 0.68 | 0.77 | 1.32 | 0.85 | 1.00 |
| X020167 | BCG_3978C | 491  | 10 | 7  | 9  | 0.90 | 0.83 | 0.93 | 0.99 | 1.04 | 1.00 |

| Hill | IC50         | pIC50       |
|------|--------------|-------------|
| NA   | $\geq 40.00$ | $\leq 4.40$ |
| 1.00 | $\geq 40.00$ | $\leq 4.40$ |
| 1.00 | $\geq 40.00$ | $\leq 4.40$ |
| 1.00 | $\geq 40.00$ | $\leq 4.40$ |
| 1.00 | $\geq 40.00$ | $\leq 4.40$ |
| 1.00 | $\geq 40.00$ | $\leq 4.40$ |
| 1.00 | $\geq 40.00$ | $\leq 4.40$ |
| 1.00 | $\geq 40.00$ | $\leq 4.40$ |
| 1.00 | $\geq 40.00$ | $\leq 4.40$ |
| 1.00 | $\geq 40.00$ | $\leq 4.40$ |
| NA   | $\geq 40.00$ | $\leq 4.40$ |
| 1.00 | $\geq 40.00$ | $\leq 4.40$ |
| 1.00 | $\geq 40.00$ | $\leq 4.40$ |
| 0.55 | $\geq 40.00$ | $\leq 4.40$ |
| 1.00 | $\geq 40.00$ | $\leq 4.40$ |
| 1.00 | $\geq 40.00$ | $\leq 4.40$ |
| 1.00 | $\geq 40.00$ | $\leq 4.40$ |
| 1.00 | $\geq 40.00$ | $\leq 4.40$ |
| NA   | $\geq 40.00$ | $\leq 4.40$ |
| NA   | $\geq 40.00$ | $\leq 4.40$ |
| NA   | $\geq 40.00$ | $\leq 4.40$ |
| 1.00 | $\geq 40.00$ | $\leq 4.40$ |
| NA   | $\geq 40.00$ | $\leq 4.40$ |
| 0.62 | $\geq 40.00$ | $\leq 4.40$ |
| 1.00 | $\geq 40.00$ | $\leq 4.40$ |
| 1.00 | $\geq 40.00$ | $\leq 4.40$ |
| 1.00 | $\geq 40.00$ | $\leq 4.40$ |
| NA   | $\geq 40.00$ | $\leq 4.40$ |
| NA   | $\geq 40.00$ | $\leq 4.40$ |



|      |         |        |
|------|---------|--------|
| 1.00 | ≥ 40.00 | ≤ 4.40 |
| 1.00 | ≥ 40.00 | ≤ 4.40 |
| NA   | ≥ 40.00 | ≤ 4.40 |
| NA   | ≥ 40.00 | ≤ 4.40 |
| 1.00 | ≥ 40.00 | ≤ 4.40 |
| NA   | ≥ 40.00 | ≤ 4.40 |
| NA   | ≥ 40.00 | ≤ 4.40 |
| NA   | ≥ 40.00 | ≤ 4.40 |
| 1.00 | ≥ 40.00 | ≤ 4.40 |
| 1.00 | ≥ 40.00 | ≤ 4.40 |
| NA   | ≥ 40.00 | ≤ 4.40 |
| 1.00 | ≥ 40.00 | ≤ 4.40 |
| NA   | ≥ 40.00 | ≤ 4.40 |
| NA   | ≥ 40.00 | ≤ 4.40 |
| 0.81 | ≥ 40.00 | ≤ 4.40 |
| NA   | ≥ 40.00 | ≤ 4.40 |
| NA   | ≥ 40.00 | ≤ 4.40 |
| 1.00 | ≥ 40.00 | ≤ 4.40 |
| 1.00 | ≥ 40.00 | ≤ 4.40 |
| 1.00 | ≥ 40.00 | ≤ 4.40 |
| 1.00 | ≥ 40.00 | ≤ 4.40 |
| 1.00 | ≥ 40.00 | ≤ 4.40 |
| 1.00 | ≥ 40.00 | ≤ 4.40 |
| NA   | ≥ 40.00 | ≤ 4.40 |
| 1.00 | ≥ 40.00 | ≤ 4.40 |
| 1.01 | ≥ 40.00 | ≤ 4.40 |
| 1.00 | ≥ 40.00 | ≤ 4.40 |
| NA   | ≥ 40.00 | ≤ 4.40 |
| 1.00 | ≥ 40.00 | ≤ 4.40 |
| NA   | ≥ 40.00 | ≤ 4.40 |
| NA   | ≥ 40.00 | ≤ 4.40 |
| 1.00 | ≥ 40.00 | ≤ 4.40 |
| 0.84 | ≥ 40.00 | ≤ 4.40 |
| NA   | ≥ 40.00 | ≤ 4.40 |
| NA   | ≥ 40.00 | ≤ 4.40 |
| 1.00 | ≥ 40.00 | ≤ 4.40 |
| 1.00 | ≥ 40.00 | ≤ 4.40 |
| NA   | ≥ 40.00 | ≤ 4.40 |
| 1.00 | ≥ 40.00 | ≤ 4.40 |
| NA   | ≥ 40.00 | ≤ 4.40 |
| 1.00 | ≥ 40.00 | ≤ 4.40 |

|      |              |             |
|------|--------------|-------------|
| NA   | $\geq 40.00$ | $\leq 4.40$ |
| NA   | $\geq 40.00$ | $\leq 4.40$ |
| 0.94 | $\geq 40.00$ | $\leq 4.40$ |
| NA   | $\geq 40.00$ | $\leq 4.40$ |
| 1.00 | $\geq 40.00$ | $\leq 4.40$ |
| 1.00 | $\geq 40.00$ | $\leq 4.40$ |
| 1.00 | $\geq 40.00$ | $\leq 4.40$ |
| NA   | $\geq 40.00$ | $\leq 4.40$ |
| NA   | $\geq 40.00$ | $\leq 4.40$ |
| NA   | $\geq 40.00$ | $\leq 4.40$ |
| NA   | $\geq 40.00$ | $\leq 4.40$ |
| 1.05 | $\geq 40.00$ | $\leq 4.40$ |
| NA   | $\geq 40.00$ | $\leq 4.40$ |
| 1.00 | $\geq 40.00$ | $\leq 4.40$ |
| NA   | $\geq 40.00$ | $\leq 4.40$ |
| NA   | $\geq 40.00$ | $\leq 4.40$ |
| NA   | $\geq 40.00$ | $\leq 4.40$ |
| 1.90 | $\geq 40.00$ | $\leq 4.40$ |
| 1.00 | $\geq 40.00$ | $\leq 4.40$ |
| NA   | $\geq 40.00$ | $\leq 4.40$ |
| 1.00 | $\geq 40.00$ | $\leq 4.40$ |
| NA   | $\geq 40.00$ | $\leq 4.40$ |
| 1.00 | $\geq 40.00$ | $\leq 4.40$ |
| 1.00 | $\geq 40.00$ | $\leq 4.40$ |
| 1.00 | $\geq 40.00$ | $\leq 4.40$ |
| 1.00 | $\geq 40.00$ | $\leq 4.40$ |
| 1.00 | $\geq 40.00$ | $\leq 4.40$ |
| 1.00 | $\geq 40.00$ | $\leq 4.40$ |
| 1.00 | $\geq 40.00$ | $\leq 4.40$ |
| 1.00 | $\geq 40.00$ | $\leq 4.40$ |
| NA   | $\geq 40.00$ | $\leq 4.40$ |
| NA   | $\geq 40.00$ | $\leq 4.40$ |
| NA   | $\geq 40.00$ | $\leq 4.40$ |
| 1.00 | $\geq 40.00$ | $\leq 4.40$ |
| 1.00 | $\geq 40.00$ | $\leq 4.40$ |
| NA   | $\geq 40.00$ | $\leq 4.40$ |
| NA   | $\geq 40.00$ | $\leq 4.40$ |
| 2.45 | $\geq 40.00$ | $\leq 4.40$ |
| 0.70 | $\geq 40.00$ | $\leq 4.40$ |
| 1.00 | $\geq 40.00$ | $\leq 4.40$ |
| 1.00 | $\geq 40.00$ | $\leq 4.40$ |

|      |              |             |
|------|--------------|-------------|
| NA   | $\geq 40.00$ | $\leq 4.40$ |
| 0.53 | $\geq 40.00$ | $\leq 4.40$ |
| 1.00 | $\geq 40.00$ | $\leq 4.40$ |
| 1.52 | $\geq 40.00$ | $\leq 4.40$ |
| 1.00 | $\geq 40.00$ | $\leq 4.40$ |
| 1.00 | $\geq 40.00$ | $\leq 4.40$ |
| 1.00 | $\geq 40.00$ | $\leq 4.40$ |
| NA   | $\geq 40.00$ | $\leq 4.40$ |
| NA   | $\geq 40.00$ | $\leq 4.40$ |
| 1.00 | $\geq 40.00$ | $\leq 4.40$ |
| NA   | $\geq 40.00$ | $\leq 4.40$ |
| NA   | $\geq 40.00$ | $\leq 4.40$ |
| 1.00 | $\geq 40.00$ | $\leq 4.40$ |
| 1.00 | $\geq 40.00$ | $\leq 4.40$ |
| NA   | $\geq 40.00$ | $\leq 4.40$ |
| 1.74 | $\geq 40.00$ | $\leq 4.40$ |
| NA   | $\geq 40.00$ | $\leq 4.40$ |
| 1.00 | $\geq 40.00$ | $\leq 4.40$ |
| 1.00 | $\geq 40.00$ | $\leq 4.40$ |
| 1.00 | $\geq 40.00$ | $\leq 4.40$ |
| NA   | $\geq 40.00$ | $\leq 4.40$ |
| 1.00 | $\geq 40.00$ | $\leq 4.40$ |
| NA   | $\geq 40.00$ | $\leq 4.40$ |
| 1.00 | $\geq 40.00$ | $\leq 4.40$ |
| NA   | $\geq 40.00$ | $\leq 4.40$ |
| 1.00 | $\geq 40.00$ | $\leq 4.40$ |
| NA   | $\geq 40.00$ | $\leq 4.40$ |
| NA   | $\geq 40.00$ | $\leq 4.40$ |
| NA   | $\geq 40.00$ | $\leq 4.40$ |
| 0.91 | $\geq 40.00$ | $\leq 4.40$ |
| NA   | $\geq 40.00$ | $\leq 4.40$ |
| NA   | $\geq 40.00$ | $\leq 4.40$ |
| NA   | $\geq 40.00$ | $\leq 4.40$ |
| 1.00 | $\geq 40.00$ | $\leq 4.40$ |
| 1.00 | $\geq 40.00$ | $\leq 4.40$ |
| 1.00 | $\geq 40.00$ | $\leq 4.40$ |
| 1.00 | $\geq 40.00$ | $\leq 4.40$ |
| 1.00 | $\geq 40.00$ | $\leq 4.40$ |
| 0.88 | $\geq 40.00$ | $\leq 4.40$ |
| NA   | $\geq 40.00$ | $\leq 4.40$ |

|      |         |        |
|------|---------|--------|
| 1.00 | ≥ 40.00 | ≤ 4.40 |
| NA   | ≥ 40.00 | ≤ 4.40 |
| 0.59 | ≥ 40.00 | ≤ 4.40 |
| 1.06 | ≥ 40.00 | ≤ 4.40 |
| NA   | ≥ 40.00 | ≤ 4.40 |
| NA   | ≥ 40.00 | ≤ 4.40 |
| 1.00 | ≥ 40.00 | ≤ 4.40 |
| NA   | ≥ 40.00 | ≤ 4.40 |
| NA   | ≥ 40.00 | ≤ 4.40 |
| 1.00 | ≥ 40.00 | ≤ 4.40 |
| 1.00 | ≥ 40.00 | ≤ 4.40 |
| 1.00 | ≥ 40.00 | ≤ 4.40 |
| 1.00 | ≥ 40.00 | ≤ 4.40 |
| 1.00 | ≥ 40.00 | ≤ 4.40 |
| 1.00 | ≥ 40.00 | ≤ 4.40 |
| 1.00 | ≥ 40.00 | ≤ 4.40 |
| 1.00 | ≥ 40.00 | ≤ 4.40 |
| 1.00 | ≥ 40.00 | ≤ 4.40 |
| NA   | ≥ 40.00 | ≤ 4.40 |
| NA   | ≥ 40.00 | ≤ 4.40 |
| 1.00 | ≥ 40.00 | ≤ 4.40 |
| 0.73 | ≥ 40.00 | ≤ 4.40 |
| 1.00 | ≥ 40.00 | ≤ 4.40 |
| 1.00 | ≥ 40.00 | ≤ 4.40 |
| 1.00 | ≥ 40.00 | ≤ 4.40 |
| 1.00 | ≥ 40.00 | ≤ 4.40 |
| NA   | ≥ 40.00 | ≤ 4.40 |
| 1.00 | ≥ 40.00 | ≤ 4.40 |
| 1.00 | ≥ 40.00 | ≤ 4.40 |
| 1.00 | ≥ 40.00 | ≤ 4.40 |
| 1.00 | ≥ 40.00 | ≤ 4.40 |
| 1.00 | ≥ 40.00 | ≤ 4.40 |
| 0.63 | ≥ 40.00 | ≤ 4.40 |
| 1.00 | ≥ 40.00 | ≤ 4.40 |
| 0.79 | ≥ 40.00 | ≤ 4.40 |
| 1.00 | ≥ 40.00 | ≤ 4.40 |
| 1.00 | ≥ 40.00 | ≤ 4.40 |
| 1.00 | ≥ 40.00 | ≤ 4.40 |
| 1.19 | ≥ 40.00 | ≤ 4.40 |
| 0.76 | ≥ 40.00 | ≤ 4.40 |
| 0.66 | ≥ 40.00 | ≤ 4.40 |
| 1.00 | ≥ 40.00 | ≤ 4.40 |
| 0.82 | ≥ 40.00 | ≤ 4.40 |

|      |              |             |
|------|--------------|-------------|
| NA   | $\geq 40.00$ | $\leq 4.40$ |
| NA   | $\geq 40.00$ | $\leq 4.40$ |
| 1.00 | $\geq 40.00$ | $\leq 4.40$ |
| NA   | $\geq 40.00$ | $\leq 4.40$ |
| NA   | $\geq 40.00$ | $\leq 4.40$ |
| 1.00 | $\geq 40.00$ | $\leq 4.40$ |
| 1.00 | $\geq 40.00$ | $\leq 4.40$ |
| 1.00 | $\geq 40.00$ | $\leq 4.40$ |
| 1.00 | $\geq 40.00$ | $\leq 4.40$ |
| 1.00 | $\geq 40.00$ | $\leq 4.40$ |
| 1.00 | $\geq 40.00$ | $\leq 4.40$ |
| 1.00 | $\geq 40.00$ | $\leq 4.40$ |
| 1.00 | $\geq 40.00$ | $\leq 4.40$ |
| 1.00 | $\geq 40.00$ | $\leq 4.40$ |
| 0.68 | $\geq 40.00$ | $\leq 4.40$ |
| 1.00 | $\geq 40.00$ | $\leq 4.40$ |
| NA   | $\geq 40.00$ | $\leq 4.40$ |
| NA   | $\geq 40.00$ | $\leq 4.40$ |
| NA   | $\geq 40.00$ | $\leq 4.40$ |
| NA   | $\geq 40.00$ | $\leq 4.40$ |
| NA   | $\geq 40.00$ | $\leq 4.40$ |
| 1.00 | $\geq 40.00$ | $\leq 4.40$ |
| NA   | $\geq 40.00$ | $\leq 4.40$ |
| NA   | $\geq 40.00$ | $\leq 4.40$ |
| 1.00 | $\geq 40.00$ | $\leq 4.40$ |
| 1.00 | $\geq 40.00$ | $\leq 4.40$ |
| 0.65 | $\geq 40.00$ | $\leq 4.40$ |
| 1.08 | $\geq 40.00$ | $\leq 4.40$ |
| 0.85 | $\geq 40.00$ | $\leq 4.40$ |
| NA   | $\geq 40.00$ | $\leq 4.40$ |
| 1.00 | $\geq 40.00$ | $\leq 4.40$ |
| 1.00 | $\geq 40.00$ | $\leq 4.40$ |
| 1.00 | $\geq 40.00$ | $\leq 4.40$ |
| 1.00 | $\geq 40.00$ | $\leq 4.40$ |
| 1.00 | $\geq 40.00$ | $\leq 4.40$ |
| 2.00 | $\geq 40.00$ | $\leq 4.40$ |
| 2.18 | $\geq 40.00$ | $\leq 4.40$ |
| 0.97 | $\geq 40.00$ | $\leq 4.40$ |
| NA   | $\geq 40.00$ | $\leq 4.40$ |
| NA   | $\geq 40.00$ | $\leq 4.40$ |
| 0.57 | $\geq 40.00$ | $\leq 4.40$ |

|      |              |             |
|------|--------------|-------------|
| 1.00 | $\geq 40.00$ | $\leq 4.40$ |
| 1.00 | $\geq 40.00$ | $\leq 4.40$ |
| 1.00 | $\geq 40.00$ | $\leq 4.40$ |
| 1.00 | $\geq 40.00$ | $\leq 4.40$ |
| 0.70 | $\geq 40.00$ | $\leq 4.40$ |
| 0.77 | $\geq 40.00$ | $\leq 4.40$ |
| 1.00 | $\geq 40.00$ | $\leq 4.40$ |
| 1.00 | $\geq 40.00$ | $\leq 4.40$ |
| 1.00 | $\geq 40.00$ | $\leq 4.40$ |
| 1.00 | $\geq 40.00$ | $\leq 4.40$ |
| 1.00 | $\geq 40.00$ | $\leq 4.40$ |
| NA   | $\geq 40.00$ | $\leq 4.40$ |
| 1.00 | $\geq 40.00$ | $\leq 4.40$ |
| NA   | $\geq 40.00$ | $\leq 4.40$ |
| 1.00 | $\geq 40.00$ | $\leq 4.40$ |
| 1.00 | $\geq 40.00$ | $\leq 4.40$ |
| NA   | $\geq 40.00$ | $\leq 4.40$ |
| NA   | $\geq 40.00$ | $\leq 4.40$ |
| NA   | $\geq 40.00$ | $\leq 4.40$ |
| NA   | $\geq 40.00$ | $\leq 4.40$ |
| 1.00 | $\geq 40.00$ | $\leq 4.40$ |
| 1.16 | $\geq 40.00$ | $\leq 4.40$ |
| 1.00 | $\geq 40.00$ | $\leq 4.40$ |
| 1.00 | $\geq 40.00$ | $\leq 4.40$ |
| 1.00 | $\geq 40.00$ | $\leq 4.40$ |
| 1.00 | $\geq 40.00$ | $\leq 4.40$ |
| NA   | $\geq 40.00$ | $\leq 4.40$ |
| NA   | $\geq 40.00$ | $\leq 4.40$ |
| 1.00 | $\geq 40.00$ | $\leq 4.40$ |
| NA   | $\geq 40.00$ | $\leq 4.40$ |
| 1.00 | $\geq 40.00$ | $\leq 4.40$ |
| 1.00 | $\geq 40.00$ | $\leq 4.40$ |
| NA   | $\geq 40.00$ | $\leq 4.40$ |
| 1.00 | $\geq 40.00$ | $\leq 4.40$ |
| 1.00 | $\geq 40.00$ | $\leq 4.40$ |
| 0.77 | $\geq 40.00$ | $\leq 4.40$ |
| 1.00 | $\geq 40.00$ | $\leq 4.40$ |
| 1.00 | $\geq 40.00$ | $\leq 4.40$ |
| NA   | $\geq 40.00$ | $\leq 4.40$ |
| NA   | $\geq 40.00$ | $\leq 4.40$ |
| NA   | $\geq 40.00$ | $\leq 4.40$ |
| NA   | $\geq 40.00$ | $\leq 4.40$ |

|      |              |             |
|------|--------------|-------------|
| NA   | $\geq 40.00$ | $\leq 4.40$ |
| 1.00 | $\geq 40.00$ | $\leq 4.40$ |
| 1.00 | $\geq 40.00$ | $\leq 4.40$ |
| NA   | $\geq 40.00$ | $\leq 4.40$ |
| 1.00 | $\geq 40.00$ | $\leq 4.40$ |
| 1.00 | $\geq 40.00$ | $\leq 4.40$ |
| 1.00 | $\geq 40.00$ | $\leq 4.40$ |
| NA   | $\geq 40.00$ | $\leq 4.40$ |
| 1.00 | $\geq 40.00$ | $\leq 4.40$ |
| 1.00 | $\geq 40.00$ | $\leq 4.40$ |
| 1.00 | $\geq 40.00$ | $\leq 4.40$ |
| 1.00 | $\geq 40.00$ | $\leq 4.40$ |
| 1.00 | $\geq 40.00$ | $\leq 4.40$ |
| 1.00 | $\geq 40.00$ | $\leq 4.40$ |
| NA   | $\geq 40.00$ | $\leq 4.40$ |
| 1.00 | $\geq 40.00$ | $\leq 4.40$ |
| NA   | $\geq 40.00$ | $\leq 4.40$ |
| NA   | $\geq 40.00$ | $\leq 4.40$ |
| 1.00 | $\geq 40.00$ | $\leq 4.40$ |
| 1.00 | $\geq 40.00$ | $\leq 4.40$ |
| 1.00 | $\geq 40.00$ | $\leq 4.40$ |
| 1.00 | $\geq 40.00$ | $\leq 4.40$ |
| 1.00 | $\geq 40.00$ | $\leq 4.40$ |
| NA   | $\geq 40.00$ | $\leq 4.40$ |
| 0.66 | $\geq 40.00$ | $\leq 4.40$ |
| 1.00 | $\geq 40.00$ | $\leq 4.40$ |
| NA   | $\geq 40.00$ | $\leq 4.40$ |
| 1.10 | $\geq 40.00$ | $\leq 4.40$ |
| NA   | $\geq 40.00$ | $\leq 4.40$ |
| 2.49 | $\geq 40.00$ | $\leq 4.40$ |
| 1.00 | $\geq 40.00$ | $\leq 4.40$ |
| NA   | $\geq 40.00$ | $\leq 4.40$ |
| 1.00 | $\geq 40.00$ | $\leq 4.40$ |
| 1.00 | $\geq 40.00$ | $\leq 4.40$ |
| NA   | $\geq 40.00$ | $\leq 4.40$ |
| 1.92 | $\geq 40.00$ | $\leq 4.40$ |
| 1.00 | $\geq 40.00$ | $\leq 4.40$ |
| 1.00 | $\geq 40.00$ | $\leq 4.40$ |
| NA   | $\geq 40.00$ | $\leq 4.40$ |
| NA   | $\geq 40.00$ | $\leq 4.40$ |
| NA   | $\geq 40.00$ | $\leq 4.40$ |
| NA   | $\geq 40.00$ | $\leq 4.40$ |

|      |              |             |
|------|--------------|-------------|
| NA   | $\geq 40.00$ | $\leq 4.40$ |
| 0.73 | $\geq 40.00$ | $\leq 4.40$ |
| NA   | $\geq 40.00$ | $\leq 4.40$ |
| NA   | $\geq 40.00$ | $\leq 4.40$ |
| 1.00 | $\geq 40.00$ | $\leq 4.40$ |
| 1.00 | $\geq 40.00$ | $\leq 4.40$ |
| NA   | $\geq 40.00$ | $\leq 4.40$ |
| NA   | $\geq 40.00$ | $\leq 4.40$ |
| NA   | $\geq 40.00$ | $\leq 4.40$ |
| 1.00 | $\geq 40.00$ | $\leq 4.40$ |
| NA   | $\geq 40.00$ | $\leq 4.40$ |
| 1.00 | $\geq 40.00$ | $\leq 4.40$ |
| 1.00 | $\geq 40.00$ | $\leq 4.40$ |
| NA   | $\geq 40.00$ | $\leq 4.40$ |
| 1.00 | $\geq 40.00$ | $\leq 4.40$ |
| 1.00 | $\geq 40.00$ | $\leq 4.40$ |
| NA   | $\geq 40.00$ | $\leq 4.40$ |
| 1.00 | $\geq 40.00$ | $\leq 4.40$ |
| 1.00 | $\geq 40.00$ | $\leq 4.40$ |
| 1.00 | $\geq 40.00$ | $\leq 4.40$ |
| 1.00 | $\geq 40.00$ | $\leq 4.40$ |
| 1.00 | $\geq 40.00$ | $\leq 4.40$ |
| 1.00 | $\geq 40.00$ | $\leq 4.40$ |
| 1.00 | $\geq 40.00$ | $\leq 4.40$ |
| 1.00 | $\geq 40.00$ | $\leq 4.40$ |
| 1.00 | $\geq 40.00$ | $\leq 4.40$ |
| 1.00 | $\geq 40.00$ | $\leq 4.40$ |
| NA   | $\geq 40.00$ | $\leq 4.40$ |
| 1.00 | $\geq 40.00$ | $\leq 4.40$ |
| NA   | $\geq 40.00$ | $\leq 4.40$ |
| NA   | $\geq 40.00$ | $\leq 4.40$ |
| 1.00 | $\geq 40.00$ | $\leq 4.40$ |
| 1.00 | $\geq 40.00$ | $\leq 4.40$ |
| 1.00 | $\geq 40.00$ | $\leq 4.40$ |
| NA   | $\geq 40.00$ | $\leq 4.40$ |
| NA   | $\geq 40.00$ | $\leq 4.40$ |
| 1.00 | $\geq 40.00$ | $\leq 4.40$ |
| 1.00 | $\geq 40.00$ | $\leq 4.40$ |
| 1.00 | $\geq 40.00$ | $\leq 4.40$ |



|      |         |        |
|------|---------|--------|
| NA   | ≥ 40.00 | ≤ 4.40 |
| NA   | ≥ 40.00 | ≤ 4.40 |
| 1.00 | ≥ 40.00 | ≤ 4.40 |
| 1.00 | ≥ 40.00 | ≤ 4.40 |
| 1.00 | ≥ 40.00 | ≤ 4.40 |
| NA   | ≥ 40.00 | ≤ 4.40 |
| 1.00 | ≥ 40.00 | ≤ 4.40 |
| 1.00 | ≥ 40.00 | ≤ 4.40 |
| NA   | ≥ 40.00 | ≤ 4.40 |
| 1.00 | ≥ 40.00 | ≤ 4.40 |
| NA   | ≥ 40.00 | ≤ 4.40 |
| 0.55 | ≥ 40.00 | ≤ 4.40 |
| NA   | ≥ 40.00 | ≤ 4.40 |
| NA   | ≥ 40.00 | ≤ 4.40 |
| 1.00 | ≥ 40.00 | ≤ 4.40 |
| NA   | ≥ 40.00 | ≤ 4.40 |
| 0.67 | ≥ 40.00 | ≤ 4.40 |
| 1.00 | ≥ 40.00 | ≤ 4.40 |
| 1.00 | ≥ 40.00 | ≤ 4.40 |
| NA   | ≥ 40.00 | ≤ 4.40 |
| 1.00 | ≥ 40.00 | ≤ 4.40 |
| 1.00 | ≥ 40.00 | ≤ 4.40 |
| NA   | ≥ 40.00 | ≤ 4.40 |
| 1.00 | ≥ 40.00 | ≤ 4.40 |
| 1.00 | ≥ 40.00 | ≤ 4.40 |
| NA   | ≥ 40.00 | ≤ 4.40 |
| NA   | ≥ 40.00 | ≤ 4.40 |
| 1.00 | ≥ 40.00 | ≤ 4.40 |
| 1.00 | ≥ 40.00 | ≤ 4.40 |
| 1.00 | ≥ 40.00 | ≤ 4.40 |
| 1.00 | ≥ 40.00 | ≤ 4.40 |
| 1.00 | ≥ 40.00 | ≤ 4.40 |
| 1.00 | ≥ 40.00 | ≤ 4.40 |
| 1.00 | ≥ 40.00 | ≤ 4.40 |
| NA   | ≥ 40.00 | ≤ 4.40 |
| 0.75 | ≥ 40.00 | ≤ 4.40 |
| 1.00 | ≥ 40.00 | ≤ 4.40 |
| NA   | ≥ 40.00 | ≤ 4.40 |
| 0.76 | ≥ 40.00 | ≤ 4.40 |
| 1.00 | ≥ 40.00 | ≤ 4.40 |

|      |              |             |
|------|--------------|-------------|
| NA   | $\geq 40.00$ | $\leq 4.40$ |
| 1.00 | $\geq 40.00$ | $\leq 4.40$ |
| 1.00 | $\geq 40.00$ | $\leq 4.40$ |
| 1.00 | $\geq 40.00$ | $\leq 4.40$ |
| 1.00 | $\geq 40.00$ | $\leq 4.40$ |
| 1.00 | $\geq 40.00$ | $\leq 4.40$ |
| 1.00 | $\geq 40.00$ | $\leq 4.40$ |
| 1.00 | $\geq 40.00$ | $\leq 4.40$ |
| 0.57 | $\geq 40.00$ | $\leq 4.40$ |
| NA   | $\geq 40.00$ | $\leq 4.40$ |
| NA   | $\geq 40.00$ | $\leq 4.40$ |
| 1.00 | $\geq 40.00$ | $\leq 4.40$ |
| NA   | $\geq 40.00$ | $\leq 4.40$ |
| NA   | $\geq 40.00$ | $\leq 4.40$ |
| NA   | $\geq 40.00$ | $\leq 4.40$ |
| NA   | $\geq 40.00$ | $\leq 4.40$ |
| 1.00 | $\geq 40.00$ | $\leq 4.40$ |
| NA   | $\geq 40.00$ | $\leq 4.40$ |
| 1.00 | $\geq 40.00$ | $\leq 4.40$ |
| 1.00 | $\geq 40.00$ | $\leq 4.40$ |
| 1.00 | $\geq 40.00$ | $\leq 4.40$ |
| NA   | $\geq 40.00$ | $\leq 4.40$ |
| NA   | $\geq 40.00$ | $\leq 4.40$ |
| NA   | $\geq 40.00$ | $\leq 4.40$ |
| 1.00 | $\geq 40.00$ | $\leq 4.40$ |
| 1.00 | $\geq 40.00$ | $\leq 4.40$ |
| NA   | $\geq 40.00$ | $\leq 4.40$ |
| NA   | $\geq 40.00$ | $\leq 4.40$ |
| 1.00 | $\geq 40.00$ | $\leq 4.40$ |
| NA   | $\geq 40.00$ | $\leq 4.40$ |
| NA   | $\geq 40.00$ | $\leq 4.40$ |
| NA   | $\geq 40.00$ | $\leq 4.40$ |
| 0.76 | $\geq 40.00$ | $\leq 4.40$ |
| NA   | $\geq 40.00$ | $\leq 4.40$ |
| 1.00 | $\geq 40.00$ | $\leq 4.40$ |
| 1.00 | $\geq 40.00$ | $\leq 4.40$ |
| 1.00 | $\geq 40.00$ | $\leq 4.40$ |
| 2.17 | $\geq 40.00$ | $\leq 4.40$ |
| 0.57 | $\geq 40.00$ | $\leq 4.40$ |
| NA   | $\geq 40.00$ | $\leq 4.40$ |

|      |              |             |
|------|--------------|-------------|
| 1.00 | $\geq 40.00$ | $\leq 4.40$ |
| 1.00 | $\geq 40.00$ | $\leq 4.40$ |
| NA   | $\geq 40.00$ | $\leq 4.40$ |
| 1.00 | $\geq 40.00$ | $\leq 4.40$ |
| NA   | $\geq 40.00$ | $\leq 4.40$ |
| NA   | $\geq 40.00$ | $\leq 4.40$ |
| NA   | $\geq 40.00$ | $\leq 4.40$ |
| 1.00 | $\geq 40.00$ | $\leq 4.40$ |
| NA   | $\geq 40.00$ | $\leq 4.40$ |
| 1.00 | $\geq 40.00$ | $\leq 4.40$ |
| 1.00 | $\geq 40.00$ | $\leq 4.40$ |
| NA   | $\geq 40.00$ | $\leq 4.40$ |
| 1.00 | $\geq 40.00$ | $\leq 4.40$ |
| 1.01 | $\geq 40.00$ | $\leq 4.40$ |
| NA   | $\geq 40.00$ | $\leq 4.40$ |
| 1.00 | $\geq 40.00$ | $\leq 4.40$ |
| 1.00 | $\geq 40.00$ | $\leq 4.40$ |
| 1.00 | $\geq 40.00$ | $\leq 4.40$ |
| NA   | $\geq 40.00$ | $\leq 4.40$ |
| 1.00 | $\geq 40.00$ | $\leq 4.40$ |
| 1.75 | $\geq 40.00$ | $\leq 4.40$ |
| NA   | $\geq 40.00$ | $\leq 4.40$ |
| 1.00 | $\geq 40.00$ | $\leq 4.40$ |
| NA   | $\geq 40.00$ | $\leq 4.40$ |
| 0.53 | $\geq 40.00$ | $\leq 4.40$ |
| 1.00 | $\geq 40.00$ | $\leq 4.40$ |
| 1.00 | $\geq 40.00$ | $\leq 4.40$ |
| NA   | $\geq 40.00$ | $\leq 4.40$ |
| NA   | $\geq 40.00$ | $\leq 4.40$ |
| 1.00 | $\geq 40.00$ | $\leq 4.40$ |
| NA   | $\geq 40.00$ | $\leq 4.40$ |
| NA   | $\geq 40.00$ | $\leq 4.40$ |
| NA   | $\geq 40.00$ | $\leq 4.40$ |
| 0.53 | $\geq 40.00$ | $\leq 4.40$ |
| NA   | $\geq 40.00$ | $\leq 4.40$ |
| 0.60 | $\geq 40.00$ | $\leq 4.40$ |
| 1.00 | $\geq 40.00$ | $\leq 4.40$ |
| 1.00 | $\geq 40.00$ | $\leq 4.40$ |
| 1.00 | $\geq 40.00$ | $\leq 4.40$ |
| 1.72 | $\geq 40.00$ | $\leq 4.40$ |

|      |              |             |
|------|--------------|-------------|
| 1.00 | $\geq 40.00$ | $\leq 4.40$ |
| NA   | $\geq 40.00$ | $\leq 4.40$ |
| 0.58 | $\geq 40.00$ | $\leq 4.40$ |
| 1.00 | $\geq 40.00$ | $\leq 4.40$ |
| 1.00 | $\geq 40.00$ | $\leq 4.40$ |
| NA   | $\geq 40.00$ | $\leq 4.40$ |
| 1.00 | $\geq 40.00$ | $\leq 4.40$ |
| 1.00 | $\geq 40.00$ | $\leq 4.40$ |
| 1.00 | $\geq 40.00$ | $\leq 4.40$ |
| 2.13 | $\geq 40.00$ | $\leq 4.40$ |
| 2.32 | $\geq 40.00$ | $\leq 4.40$ |
| 0.73 | $\geq 40.00$ | $\leq 4.40$ |
| 1.00 | $\geq 40.00$ | $\leq 4.40$ |
| NA   | $\geq 40.00$ | $\leq 4.40$ |
| NA   | $\geq 40.00$ | $\leq 4.40$ |
| NA   | $\geq 40.00$ | $\leq 4.40$ |
| 1.00 | $\geq 40.00$ | $\leq 4.40$ |
| 0.65 | $\geq 40.00$ | $\leq 4.40$ |
| NA   | $\geq 40.00$ | $\leq 4.40$ |
| NA   | $\geq 40.00$ | $\leq 4.40$ |
| 1.00 | $\geq 40.00$ | $\leq 4.40$ |
| NA   | $\geq 40.00$ | $\leq 4.40$ |
| 1.00 | $\geq 40.00$ | $\leq 4.40$ |
| 1.00 | $\geq 40.00$ | $\leq 4.40$ |
| 1.86 | $\geq 40.00$ | $\leq 4.40$ |
| 1.00 | $\geq 40.00$ | $\leq 4.40$ |
| NA   | $\geq 40.00$ | $\leq 4.40$ |
| 1.00 | $\geq 40.00$ | $\leq 4.40$ |
| 0.96 | $\geq 40.00$ | $\leq 4.40$ |
| 1.00 | $\geq 40.00$ | $\leq 4.40$ |
| 2.20 | $\geq 40.00$ | $\leq 4.40$ |
| NA   | $\geq 40.00$ | $\leq 4.40$ |
| 1.00 | $\geq 40.00$ | $\leq 4.40$ |
| 1.00 | $\geq 40.00$ | $\leq 4.40$ |
| 1.00 | $\geq 40.00$ | $\leq 4.40$ |
| 1.00 | $\geq 40.00$ | $\leq 4.40$ |
| NA   | $\geq 40.00$ | $\leq 4.40$ |
| NA   | $\geq 40.00$ | $\leq 4.40$ |
| NA   | $\geq 40.00$ | $\leq 4.40$ |
| 0.96 | $\geq 40.00$ | $\leq 4.40$ |

|      |         |        |
|------|---------|--------|
| NA   | ≥ 40.00 | ≤ 4.40 |
| 1.00 | ≥ 40.00 | ≤ 4.40 |
| 1.00 | ≥ 40.00 | ≤ 4.40 |
| NA   | ≥ 40.00 | ≤ 4.40 |
| 1.00 | ≥ 40.00 | ≤ 4.40 |
| NA   | ≥ 40.00 | ≤ 4.40 |
| 1.00 | ≥ 40.00 | ≤ 4.40 |
| 1.00 | ≥ 40.00 | ≤ 4.40 |
| 0.61 | ≥ 40.00 | ≤ 4.40 |
| NA   | ≥ 40.00 | ≤ 4.40 |
| 1.87 | ≥ 40.00 | ≤ 4.40 |
| 1.82 | ≥ 40.00 | ≤ 4.40 |
| NA   | ≥ 40.00 | ≤ 4.40 |
| 1.00 | ≥ 40.00 | ≤ 4.40 |
| 1.45 | ≥ 40.00 | ≤ 4.40 |
| 0.54 | ≥ 40.00 | ≤ 4.40 |
| NA   | ≥ 40.00 | ≤ 4.40 |
| NA   | ≥ 40.00 | ≤ 4.40 |
| NA   | ≥ 40.00 | ≤ 4.40 |
| NA   | ≥ 40.00 | ≤ 4.40 |
| 1.00 | ≥ 40.00 | ≤ 4.40 |
| 1.00 | ≥ 40.00 | ≤ 4.40 |
| 1.00 | ≥ 40.00 | ≤ 4.40 |
| NA   | ≥ 40.00 | ≤ 4.40 |
| 1.00 | ≥ 40.00 | ≤ 4.40 |
| 1.00 | ≥ 40.00 | ≤ 4.40 |
| 1.96 | ≥ 40.00 | ≤ 4.40 |
| NA   | ≥ 40.00 | ≤ 4.40 |
| 1.00 | ≥ 40.00 | ≤ 4.40 |
| NA   | ≥ 40.00 | ≤ 4.40 |
| 1.00 | ≥ 40.00 | ≤ 4.40 |
| 1.00 | ≥ 40.00 | ≤ 4.40 |
| 1.00 | ≥ 40.00 | ≤ 4.40 |
| 1.00 | ≥ 40.00 | ≤ 4.40 |
| 1.00 | ≥ 40.00 | ≤ 4.40 |
| 1.00 | ≥ 40.00 | ≤ 4.40 |
| NA   | ≥ 40.00 | ≤ 4.40 |
| 1.00 | ≥ 40.00 | ≤ 4.40 |
| 1.00 | ≥ 40.00 | ≤ 4.40 |
| 1.00 | ≥ 40.00 | ≤ 4.40 |

|      |              |             |
|------|--------------|-------------|
| 1.00 | $\geq 40.00$ | $\leq 4.40$ |
| NA   | $\geq 40.00$ | $\leq 4.40$ |
| 1.00 | $\geq 40.00$ | $\leq 4.40$ |
| NA   | $\geq 40.00$ | $\leq 4.40$ |
| 1.00 | $\geq 40.00$ | $\leq 4.40$ |
| NA   | $\geq 40.00$ | $\leq 4.40$ |
| 1.00 | $\geq 40.00$ | $\leq 4.40$ |
| NA   | $\geq 40.00$ | $\leq 4.40$ |
| NA   | $\geq 40.00$ | $\leq 4.40$ |
| 0.54 | $\geq 40.00$ | $\leq 4.40$ |
| NA   | $\geq 40.00$ | $\leq 4.40$ |
| NA   | $\geq 40.00$ | $\leq 4.40$ |
| 1.00 | $\geq 40.00$ | $\leq 4.40$ |
| 1.00 | $\geq 40.00$ | $\leq 4.40$ |
| 0.61 | $\geq 40.00$ | $\leq 4.40$ |
| 1.00 | $\geq 40.00$ | $\leq 4.40$ |
| NA   | $\geq 40.00$ | $\leq 4.40$ |
| 1.00 | $\geq 40.00$ | $\leq 4.40$ |
| NA   | $\geq 40.00$ | $\leq 4.40$ |
| NA   | $\geq 40.00$ | $\leq 4.40$ |
| 1.00 | $\geq 40.00$ | $\leq 4.40$ |
| NA   | $\geq 40.00$ | $\leq 4.40$ |
| 1.00 | $\geq 40.00$ | $\leq 4.40$ |
| 1.00 | $\geq 40.00$ | $\leq 4.40$ |
| NA   | $\geq 40.00$ | $\leq 4.40$ |
| NA   | $\geq 40.00$ | $\leq 4.40$ |
| NA   | $\geq 40.00$ | $\leq 4.40$ |
| NA   | $\geq 40.00$ | $\leq 4.40$ |
| 1.00 | $\geq 40.00$ | $\leq 4.40$ |
| NA   | $\geq 40.00$ | $\leq 4.40$ |
| NA   | $\geq 40.00$ | $\leq 4.40$ |
| 1.00 | $\geq 40.00$ | $\leq 4.40$ |
| 1.00 | $\geq 40.00$ | $\leq 4.40$ |
| 1.00 | $\geq 40.00$ | $\leq 4.40$ |
| NA   | $\geq 40.00$ | $\leq 4.40$ |
| NA   | $\geq 40.00$ | $\leq 4.40$ |
| 0.69 | $\geq 40.00$ | $\leq 4.40$ |
| 1.00 | $\geq 40.00$ | $\leq 4.40$ |
| 0.73 | $\geq 40.00$ | $\leq 4.40$ |
| 1.00 | $\geq 40.00$ | $\leq 4.40$ |

|      |              |             |
|------|--------------|-------------|
| 1.00 | $\geq 40.00$ | $\leq 4.40$ |
| NA   | $\geq 40.00$ | $\leq 4.40$ |
| NA   | $\geq 40.00$ | $\leq 4.40$ |
| NA   | $\geq 40.00$ | $\leq 4.40$ |
| 1.00 | $\geq 40.00$ | $\leq 4.40$ |
| 1.00 | $\geq 40.00$ | $\leq 4.40$ |
| NA   | $\geq 40.00$ | $\leq 4.40$ |
| NA   | $\geq 40.00$ | $\leq 4.40$ |
| NA   | $\geq 40.00$ | $\leq 4.40$ |
| NA   | $\geq 40.00$ | $\leq 4.40$ |
| 1.00 | $\geq 40.00$ | $\leq 4.40$ |
| 1.00 | $\geq 40.00$ | $\leq 4.40$ |
| 1.00 | $\geq 40.00$ | $\leq 4.40$ |
| NA   | $\geq 40.00$ | $\leq 4.40$ |
| NA   | $\geq 40.00$ | $\leq 4.40$ |
| 1.00 | $\geq 40.00$ | $\leq 4.40$ |
| NA   | $\geq 40.00$ | $\leq 4.40$ |
| 1.00 | $\geq 40.00$ | $\leq 4.40$ |
| NA   | $\geq 40.00$ | $\leq 4.40$ |
| NA   | $\geq 40.00$ | $\leq 4.40$ |
| NA   | $\geq 40.00$ | $\leq 4.40$ |
| 1.00 | $\geq 40.00$ | $\leq 4.40$ |
| NA   | $\geq 40.00$ | $\leq 4.40$ |
| 1.00 | $\geq 40.00$ | $\leq 4.40$ |
| 1.34 | $\geq 40.00$ | $\leq 4.40$ |
| NA   | $\geq 40.00$ | $\leq 4.40$ |
| 1.00 | $\geq 40.00$ | $\leq 4.40$ |
| 1.00 | $\geq 40.00$ | $\leq 4.40$ |
| 1.00 | $\geq 40.00$ | $\leq 4.40$ |
| 1.00 | $\geq 40.00$ | $\leq 4.40$ |
| NA   | $\geq 40.00$ | $\leq 4.40$ |
| NA   | $\geq 40.00$ | $\leq 4.40$ |
| 0.82 | $\geq 40.00$ | $\leq 4.40$ |
| 1.00 | $\geq 40.00$ | $\leq 4.40$ |
| 0.58 | $\geq 40.00$ | $\leq 4.40$ |
| 1.00 | $\geq 40.00$ | $\leq 4.40$ |
| 1.00 | $\geq 40.00$ | $\leq 4.40$ |
| 1.00 | $\geq 40.00$ | $\leq 4.40$ |
| NA   | $\geq 40.00$ | $\leq 4.40$ |
| 1.00 | $\geq 40.00$ | $\leq 4.40$ |

|      |              |             |
|------|--------------|-------------|
| 1.00 | $\geq 40.00$ | $\leq 4.40$ |
| 1.00 | $\geq 40.00$ | $\leq 4.40$ |
| 1.00 | $\geq 40.00$ | $\leq 4.40$ |
| NA   | $\geq 40.00$ | $\leq 4.40$ |
| 1.00 | $\geq 40.00$ | $\leq 4.40$ |
| 1.00 | $\geq 40.00$ | $\leq 4.40$ |
| NA   | $\geq 40.00$ | $\leq 4.40$ |
| NA   | $\geq 40.00$ | $\leq 4.40$ |
| 1.00 | $\geq 40.00$ | $\leq 4.40$ |
| 1.00 | $\geq 40.00$ | $\leq 4.40$ |
| 1.00 | $\geq 40.00$ | $\leq 4.40$ |
| NA   | $\geq 40.00$ | $\leq 4.40$ |
| NA   | $\geq 40.00$ | $\leq 4.40$ |
| 1.00 | $\geq 40.00$ | $\leq 4.40$ |
| 1.00 | $\geq 40.00$ | $\leq 4.40$ |
| 1.00 | $\geq 40.00$ | $\leq 4.40$ |
| NA   | $\geq 40.00$ | $\leq 4.40$ |
| NA   | $\geq 40.00$ | $\leq 4.40$ |
| NA   | $\geq 40.00$ | $\leq 4.40$ |
| 1.00 | $\geq 40.00$ | $\leq 4.40$ |
| NA   | $\geq 40.00$ | $\leq 4.40$ |
| 0.82 | $\geq 40.00$ | $\leq 4.40$ |
| 1.00 | $\geq 40.00$ | $\leq 4.40$ |
| 1.00 | $\geq 40.00$ | $\leq 4.40$ |
| 1.00 | $\geq 40.00$ | $\leq 4.40$ |
| 1.00 | $\geq 40.00$ | $\leq 4.40$ |
| 1.00 | $\geq 40.00$ | $\leq 4.40$ |
| 1.00 | $\geq 40.00$ | $\leq 4.40$ |
| 1.00 | $\geq 40.00$ | $\leq 4.40$ |
| 1.00 | $\geq 40.00$ | $\leq 4.40$ |
| 1.00 | $\geq 40.00$ | $\leq 4.40$ |
| 1.00 | $\geq 40.00$ | $\leq 4.40$ |
| 1.00 | $\geq 40.00$ | $\leq 4.40$ |
| 1.00 | $\geq 40.00$ | $\leq 4.40$ |
| 1.00 | $\geq 40.00$ | $\leq 4.40$ |
| 1.00 | $\geq 40.00$ | $\leq 4.40$ |
| 1.00 | $\geq 40.00$ | $\leq 4.40$ |
| 1.00 | $\geq 40.00$ | $\leq 4.40$ |
| 1.00 | $\geq 40.00$ | $\leq 4.40$ |
| 1.00 | $\geq 40.00$ | $\leq 4.40$ |
| 1.00 | $\geq 40.00$ | $\leq 4.40$ |
| 1.00 | $\geq 40.00$ | $\leq 4.40$ |
| 1.00 | $\geq 40.00$ | $\leq 4.40$ |
| 1.00 | $\geq 40.00$ | $\leq 4.40$ |
| 1.00 | $\geq 40.00$ | $\leq 4.40$ |
| 1.83 | $\geq 40.00$ | $\leq 4.40$ |
| 1.00 | $\geq 40.00$ | $\leq 4.40$ |



|      |              |             |
|------|--------------|-------------|
| NA   | $\geq 40.00$ | $\leq 4.40$ |
| NA   | $\geq 40.00$ | $\leq 4.40$ |
| NA   | $\geq 40.00$ | $\leq 4.40$ |
| 1.00 | $\geq 40.00$ | $\leq 4.40$ |
| 1.00 | $\geq 40.00$ | $\leq 4.40$ |
| NA   | $\geq 40.00$ | $\leq 4.40$ |
| 1.00 | $\geq 40.00$ | $\leq 4.40$ |
| 1.00 | $\geq 40.00$ | $\leq 4.40$ |
| 1.00 | $\geq 40.00$ | $\leq 4.40$ |
| 0.56 | $\geq 40.00$ | $\leq 4.40$ |
| 0.59 | $\geq 40.00$ | $\leq 4.40$ |
| NA   | $\geq 40.00$ | $\leq 4.40$ |
| 1.00 | $\geq 40.00$ | $\leq 4.40$ |
| NA   | $\geq 40.00$ | $\leq 4.40$ |
| 1.00 | $\geq 40.00$ | $\leq 4.40$ |
| NA   | $\geq 40.00$ | $\leq 4.40$ |
| NA   | $\geq 40.00$ | $\leq 4.40$ |
| 1.00 | $\geq 40.00$ | $\leq 4.40$ |
| 1.41 | $\geq 40.00$ | $\leq 4.40$ |
| NA   | $\geq 40.00$ | $\leq 4.40$ |
| 1.00 | $\geq 40.00$ | $\leq 4.40$ |
| NA   | $\geq 40.00$ | $\leq 4.40$ |
| 1.00 | $\geq 40.00$ | $\leq 4.40$ |
| 1.00 | $\geq 40.00$ | $\leq 4.40$ |
| 1.00 | $\geq 40.00$ | $\leq 4.40$ |
| 1.00 | $\geq 40.00$ | $\leq 4.40$ |
| NA   | $\geq 40.00$ | $\leq 4.40$ |
| 1.00 | $\geq 40.00$ | $\leq 4.40$ |
| 1.00 | $\geq 40.00$ | $\leq 4.40$ |
| 1.00 | $\geq 40.00$ | $\leq 4.40$ |
| NA   | $\geq 40.00$ | $\leq 4.40$ |
| NA   | $\geq 40.00$ | $\leq 4.40$ |
| 1.00 | $\geq 40.00$ | $\leq 4.40$ |
| 1.00 | $\geq 40.00$ | $\leq 4.40$ |
| 1.00 | $\geq 40.00$ | $\leq 4.40$ |
| 1.00 | $\geq 40.00$ | $\leq 4.40$ |
| NA   | $\geq 40.00$ | $\leq 4.40$ |
| 1.00 | $\geq 40.00$ | $\leq 4.40$ |
| 0.84 | $\geq 40.00$ | $\leq 4.40$ |
| 1.63 | $\geq 40.00$ | $\leq 4.40$ |
| 1.00 | $\geq 40.00$ | $\leq 4.40$ |

|      |              |             |
|------|--------------|-------------|
| 1.00 | $\geq 40.00$ | $\leq 4.40$ |
| 1.00 | $\geq 40.00$ | $\leq 4.40$ |
| NA   | $\geq 40.00$ | $\leq 4.40$ |
| NA   | $\geq 40.00$ | $\leq 4.40$ |
| 2.35 | $\geq 40.00$ | $\leq 4.40$ |
| 1.00 | $\geq 40.00$ | $\leq 4.40$ |
| 1.00 | $\geq 40.00$ | $\leq 4.40$ |
| NA   | $\geq 40.00$ | $\leq 4.40$ |
| 1.00 | $\geq 40.00$ | $\leq 4.40$ |
| NA   | $\geq 40.00$ | $\leq 4.40$ |
| 1.15 | $\geq 40.00$ | $\leq 4.40$ |
| 0.94 | $\geq 40.00$ | $\leq 4.40$ |
| NA   | $\geq 40.00$ | $\leq 4.40$ |
| NA   | $\geq 40.00$ | $\leq 4.40$ |
| 1.00 | $\geq 40.00$ | $\leq 4.40$ |
| 1.00 | $\geq 40.00$ | $\leq 4.40$ |
| 1.04 | $\geq 40.00$ | $\leq 4.40$ |
| 1.00 | $\geq 40.00$ | $\leq 4.40$ |
| 1.00 | $\geq 40.00$ | $\leq 4.40$ |
| 1.00 | $\geq 40.00$ | $\leq 4.40$ |
| NA   | $\geq 40.00$ | $\leq 4.40$ |
| 1.00 | $\geq 40.00$ | $\leq 4.40$ |
| 1.00 | $\geq 40.00$ | $\leq 4.40$ |
| NA   | $\geq 40.00$ | $\leq 4.40$ |
| 1.00 | $\geq 40.00$ | $\leq 4.40$ |
| 1.00 | $\geq 40.00$ | $\leq 4.40$ |
| 1.00 | $\geq 40.00$ | $\leq 4.40$ |
| 1.00 | $\geq 40.00$ | $\leq 4.40$ |
| NA   | $\geq 40.00$ | $\leq 4.40$ |
| 1.00 | $\geq 40.00$ | $\leq 4.40$ |
| 1.00 | $\geq 40.00$ | $\leq 4.40$ |
| NA   | $\geq 40.00$ | $\leq 4.40$ |
| 1.00 | $\geq 40.00$ | $\leq 4.40$ |
| 1.00 | $\geq 40.00$ | $\leq 4.40$ |
| NA   | $\geq 40.00$ | $\leq 4.40$ |
| NA   | $\geq 40.00$ | $\leq 4.40$ |
| 1.00 | $\geq 40.00$ | $\leq 4.40$ |
| NA   | $\geq 40.00$ | $\leq 4.40$ |
| NA   | $\geq 40.00$ | $\leq 4.40$ |
| 1.00 | $\geq 40.00$ | $\leq 4.40$ |

|      |              |             |
|------|--------------|-------------|
| 1.00 | $\geq 40.00$ | $\leq 4.40$ |
| NA   | $\geq 40.00$ | $\leq 4.40$ |
| 1.00 | $\geq 40.00$ | $\leq 4.40$ |
| NA   | $\geq 40.00$ | $\leq 4.40$ |
| 0.80 | $\geq 40.00$ | $\leq 4.40$ |
| NA   | $\geq 40.00$ | $\leq 4.40$ |
| NA   | $\geq 40.00$ | $\leq 4.40$ |
| NA   | $\geq 40.00$ | $\leq 4.40$ |
| 1.00 | $\geq 40.00$ | $\leq 4.40$ |
| 1.00 | $\geq 40.00$ | $\leq 4.40$ |
| 1.00 | $\geq 40.00$ | $\leq 4.40$ |
| 1.00 | $\geq 40.00$ | $\leq 4.40$ |
| 1.00 | $\geq 40.00$ | $\leq 4.40$ |
| 1.00 | $\geq 40.00$ | $\leq 4.40$ |
| 1.00 | $\geq 40.00$ | $\leq 4.40$ |
| NA   | $\geq 40.00$ | $\leq 4.40$ |
| 1.00 | $\geq 40.00$ | $\leq 4.40$ |
| 1.00 | $\geq 40.00$ | $\leq 4.40$ |
| NA   | $\geq 40.00$ | $\leq 4.40$ |
| 1.00 | $\geq 40.00$ | $\leq 4.40$ |
| 0.51 | $\geq 40.00$ | $\leq 4.40$ |
| NA   | $\geq 40.00$ | $\leq 4.40$ |
| 1.00 | $\geq 40.00$ | $\leq 4.40$ |
| 1.00 | $\geq 40.00$ | $\leq 4.40$ |
| 1.00 | $\geq 40.00$ | $\leq 4.40$ |
| 1.00 | $\geq 40.00$ | $\leq 4.40$ |
| 1.00 | $\geq 40.00$ | $\leq 4.40$ |
| 1.00 | $\geq 40.00$ | $\leq 4.40$ |
| 1.00 | $\geq 40.00$ | $\leq 4.40$ |
| 0.51 | $\geq 40.00$ | $\leq 4.40$ |
| 1.00 | $\geq 40.00$ | $\leq 4.40$ |
| 0.52 | $\geq 40.00$ | $\leq 4.40$ |
| 1.00 | $\geq 40.00$ | $\leq 4.40$ |
| NA   | $\geq 40.00$ | $\leq 4.40$ |
| NA   | $\geq 40.00$ | $\leq 4.40$ |
| 1.00 | $\geq 40.00$ | $\leq 4.40$ |
| NA   | $\geq 40.00$ | $\leq 4.40$ |
| NA   | $\geq 40.00$ | $\leq 4.40$ |
| NA   | $\geq 40.00$ | $\leq 4.40$ |
| NA   | $\geq 40.00$ | $\leq 4.40$ |
| 1.00 | $\geq 40.00$ | $\leq 4.40$ |
| NA   | $\geq 40.00$ | $\leq 4.40$ |

|      |              |             |
|------|--------------|-------------|
| NA   | $\geq 40.00$ | $\leq 4.40$ |
| 0.68 | $\geq 40.00$ | $\leq 4.40$ |
| 1.00 | $\geq 40.00$ | $\leq 4.40$ |
| 0.91 | $\geq 40.00$ | $\leq 4.40$ |
| 0.90 | $\geq 40.00$ | $\leq 4.40$ |
| NA   | $\geq 40.00$ | $\leq 4.40$ |
| 1.00 | $\geq 40.00$ | $\leq 4.40$ |
| 1.00 | $\geq 40.00$ | $\leq 4.40$ |
| 1.00 | $\geq 40.00$ | $\leq 4.40$ |
| 1.00 | $\geq 40.00$ | $\leq 4.40$ |
| NA   | $\geq 40.00$ | $\leq 4.40$ |
| NA   | $\geq 40.00$ | $\leq 4.40$ |
| NA   | $\geq 40.00$ | $\leq 4.40$ |
| 1.00 | $\geq 40.00$ | $\leq 4.40$ |
| 1.00 | $\geq 40.00$ | $\leq 4.40$ |
| NA   | $\geq 40.00$ | $\leq 4.40$ |
| 2.29 | $\geq 40.00$ | $\leq 4.40$ |
| 1.00 | $\geq 40.00$ | $\leq 4.40$ |
| NA   | $\geq 40.00$ | $\leq 4.40$ |
| NA   | $\geq 40.00$ | $\leq 4.40$ |
| NA   | $\geq 40.00$ | $\leq 4.40$ |
| 1.00 | $\geq 40.00$ | $\leq 4.40$ |
| 1.00 | $\geq 40.00$ | $\leq 4.40$ |
| 1.80 | $\geq 40.00$ | $\leq 4.40$ |
| 1.00 | $\geq 40.00$ | $\leq 4.40$ |
| NA   | $\geq 40.00$ | $\leq 4.40$ |
| 1.86 | $\geq 40.00$ | $\leq 4.40$ |
| 1.00 | $\geq 40.00$ | $\leq 4.40$ |
| 1.00 | $\geq 40.00$ | $\leq 4.40$ |
| 1.00 | $\geq 40.00$ | $\leq 4.40$ |
| 1.00 | $\geq 40.00$ | $\leq 4.40$ |
| NA   | $\geq 40.00$ | $\leq 4.40$ |
| NA   | $\geq 40.00$ | $\leq 4.40$ |
| NA   | $\geq 40.00$ | $\leq 4.40$ |
| 0.54 | $\geq 40.00$ | $\leq 4.40$ |
| 0.60 | $\geq 40.00$ | $\leq 4.40$ |
| NA   | $\geq 40.00$ | $\leq 4.40$ |
| NA   | $\geq 40.00$ | $\leq 4.40$ |
| NA   | $\geq 40.00$ | $\leq 4.40$ |
| NA   | $\geq 40.00$ | $\leq 4.40$ |

|      |              |             |
|------|--------------|-------------|
| 0.64 | $\geq 40.00$ | $\leq 4.40$ |
| 1.00 | $\geq 40.00$ | $\leq 4.40$ |
| 0.58 | $\geq 40.00$ | $\leq 4.40$ |
| 1.00 | $\geq 40.00$ | $\leq 4.40$ |
| 1.00 | $\geq 40.00$ | $\leq 4.40$ |
| 1.19 | $\geq 40.00$ | $\leq 4.40$ |
| NA   | $\geq 40.00$ | $\leq 4.40$ |
| NA   | $\geq 40.00$ | $\leq 4.40$ |
| 1.00 | $\geq 40.00$ | $\leq 4.40$ |
| 1.00 | $\geq 40.00$ | $\leq 4.40$ |
| NA   | $\geq 40.00$ | $\leq 4.40$ |
| NA   | $\geq 40.00$ | $\leq 4.40$ |
| NA   | $\geq 40.00$ | $\leq 4.40$ |
| 1.00 | $\geq 40.00$ | $\leq 4.40$ |
| 1.00 | $\geq 40.00$ | $\leq 4.40$ |
| 1.00 | $\geq 40.00$ | $\leq 4.40$ |
| NA   | $\geq 40.00$ | $\leq 4.40$ |
| 0.62 | $\geq 40.00$ | $\leq 4.40$ |
| 1.00 | $\geq 40.00$ | $\leq 4.40$ |
| NA   | $\geq 40.00$ | $\leq 4.40$ |
| NA   | $\geq 40.00$ | $\leq 4.40$ |
| 0.60 | $\geq 40.00$ | $\leq 4.40$ |
| 1.00 | $\geq 40.00$ | $\leq 4.40$ |
| 1.00 | $\geq 40.00$ | $\leq 4.40$ |
| NA   | $\geq 40.00$ | $\leq 4.40$ |
| NA   | $\geq 40.00$ | $\leq 4.40$ |
| 1.00 | $\geq 40.00$ | $\leq 4.40$ |
| 1.00 | $\geq 40.00$ | $\leq 4.40$ |
| 1.00 | $\geq 40.00$ | $\leq 4.40$ |
| NA   | $\geq 40.00$ | $\leq 4.40$ |
| NA   | $\geq 40.00$ | $\leq 4.40$ |
| 0.61 | $\geq 40.00$ | $\leq 4.40$ |
| NA   | $\geq 40.00$ | $\leq 4.40$ |
| NA   | $\geq 40.00$ | $\leq 4.40$ |
| 1.00 | $\geq 40.00$ | $\leq 4.40$ |
| 1.00 | $\geq 40.00$ | $\leq 4.40$ |
| 0.70 | $\geq 40.00$ | $\leq 4.40$ |

**Park et al., Supplementary Table 8**

**Proteins identified with Compound 4-matrix in lysates from HEK293 cells, K562 cells, and placenta tissue. Generation of IC50 values for test compound Compound 6**

Abbreviations: SSM; number of spectrum-to-sequence matches, UPM; unique peptide matches, NA; not available

| Experiment ID | Protein Name | IPI accession number | Mascot Score | SSM | UPM | SSM used for quantification | abundance relative to vehicle |         |         |         |         |
|---------------|--------------|----------------------|--------------|-----|-----|-----------------------------|-------------------------------|---------|---------|---------|---------|
|               |              |                      |              |     |     |                             | TMT126                        | TMT127L | TMT127H | TMT128L | TMT128H |
| X020168       | 7 KDA PRG    | IPI00877923.1        | 53           | 2   | 2   | 2                           | 0.26                          | 0.20    | 0.16    | 0.31    | 0.23    |
| X020168       | AARS         | IPI00910701.1        | 392          | 15  | 10  | 10                          | 0.19                          | 0.22    | 0.17    | 0.28    | 0.20    |
| X020168       | ABCE1        | IPI00303207.3        | 197          | 7   | 3   | 3                           | 0.15                          | 0.22    | 0.15    | 0.21    | 0.17    |
| X020168       | ACADM        | IPI00513827.3        | 81           | 3   | 3   | 3                           | 0.23                          | 0.24    | 0.21    | 0.31    | 0.25    |
| X020168       | ACADVL       | IPI00028031.2        | 253          | 7   | 5   | 5                           | 0.29                          | 0.29    | 0.23    | 0.36    | 0.26    |
| X020168       | ACAT1        | IPI00030363.1        | 420          | 9   | 7   | 7                           | 0.15                          | 0.16    | 0.13    | 0.21    | 0.16    |
| X020168       | ACO2         | IPI00790739.1        | 518          | 12  | 5   | 5                           | 0.14                          | 0.16    | 0.12    | 0.23    | 0.14    |
| X020168       | ACSL3        | IPI00031397.3        | 88           | 3   | 2   | 2                           | 0.17                          | 0.21    | 0.22    | 0.26    | 0.21    |
| X020168       | ACTB         | IPI00894498.1        | 1029         | 39  | 6   | 9                           | 0.30                          | 0.31    | 0.21    | 0.28    | 0.23    |
| X020168       | AGK          | IPI00019353.4        | 298          | 6   | 4   | 4                           | 0.36                          | 0.31    | 0.33    | 0.36    | 0.36    |
| X020168       | AIFM1        | IPI00000690.1        | 535          | 13  | 9   | 9                           | 0.26                          | 0.25    | 0.23    | 0.30    | 0.27    |
| X020168       | AK2          | IPI00215901.1        | 441          | 12  | 8   | 9                           | 0.16                          | 0.18    | 0.13    | 0.19    | 0.15    |
| X020168       | ALDH1B1      | IPI00103467.4        | 107          | 3   | 2   | 2                           | 0.19                          | 0.19    | 0.13    | 0.22    | 0.18    |
| X020168       | ANP32E       | IPI00165393.1        | 417          | 8   | 6   | 6                           | 0.28                          | 0.18    | 0.17    | 0.23    | 0.20    |
| X020168       | ANXA1        | IPI00218918.5        | 811          | 27  | 14  | 15                          | 0.29                          | 0.29    | 0.25    | 0.33    | 0.26    |
| X020168       | ANXA7        | IPI00002460.3        | 222          | 6   | 3   | 3                           | 0.24                          | 0.29    | 0.26    | 0.29    | 0.27    |
| X020168       | AP2M1        | IPI00909772.1        | 185          | 7   | 5   | 5                           | 0.30                          | 0.33    | 0.31    | 0.38    | 0.33    |
| X020168       | AP2S1        | IPI00219840.4        | 75           | 2   | 2   | 2                           | 0.28                          | 0.25    | 0.31    | 0.37    | 0.28    |
| X020168       | API5         | IPI00855856.2        | 139          | 6   | 3   | 3                           | 0.19                          | 0.17    | 0.17    | 0.26    | 0.19    |
| X020168       | APIP         | IPI00911064.1        | 75           | 3   | 2   | 2                           | 0.32                          | 0.30    | 0.35    | 0.42    | 0.41    |
| X020168       | APOBEC3      | IPI00872929.2        | 118          | 4   | 2   | 2                           | 0.24                          | 0.27    | 0.29    | 0.31    | 0.30    |
| X020168       | APRT         | IPI00218693.8        | 85           | 3   | 3   | 3                           | 0.17                          | 0.25    | 0.19    | 0.25    | 0.18    |
| X020168       | ARF3         | IPI00215917.3        | 346          | 9   | 3   | 4                           | 0.17                          | 0.19    | 0.15    | 0.22    | 0.17    |
| X020168       | ARHGEF2      | IPI00472160.5        | 205          | 8   | 3   | 3                           | 0.31                          | 0.33    | 0.33    | 0.38    | 0.49    |
| X020168       | ARL8B        | IPI00018871.2        | 277          | 8   | 2   | 2                           | 0.03                          | 0.09    | 0.03    | 0.09    | 0.04    |
| X020168       | ASAH1        | IPI00418446.4        | 124          | 5   | 3   | 3                           | 0.32                          | 0.34    | 0.28    | 0.35    | 0.33    |
| X020168       | ATP1B3       | IPI00008167.1        | 141          | 4   | 2   | 2                           | 0.28                          | 0.38    | 0.29    | 0.28    | 0.33    |
| X020168       | ATP5A1       | IPI00440493.2        | 1092         | 30  | 21  | 24                          | 0.17                          | 0.18    | 0.16    | 0.24    | 0.19    |

|         |          |               |      |    |    |    |      |      |      |      |      |
|---------|----------|---------------|------|----|----|----|------|------|------|------|------|
| X020168 | ATP5B    | IPI00303476.1 | 790  | 14 | 12 | 13 | 0.21 | 0.25 | 0.19 | 0.28 | 0.24 |
| X020168 | ATP5D    | IPI00024920.1 | 118  | 2  | 2  | 2  | 0.14 | 0.15 | 0.14 | 0.17 | 0.13 |
| X020168 | ATP5E    | IPI00215878.6 | 87   | 4  | 2  | 2  | 0.17 | 0.15 | 0.13 | 0.20 | 0.14 |
| X020168 | ATP5L    | IPI00027448.3 | 87   | 4  | 2  | 2  | 0.13 | 0.18 | 0.14 | 0.18 | 0.15 |
| X020168 | BAG2     | IPI00000643.1 | 338  | 8  | 5  | 5  | 0.25 | 0.26 | 0.21 | 0.28 | 0.26 |
| X020168 | BAT1     | IPI00641829.5 | 525  | 16 | 5  | 5  | 0.22 | 0.21 | 0.21 | 0.32 | 0.22 |
| X020168 | BCAP31   | IPI00642984.2 | 325  | 11 | 6  | 6  | 0.15 | 0.18 | 0.12 | 0.20 | 0.15 |
| X020168 | BRP44    | IPI00022832.1 | 95   | 4  | 3  | 4  | 0.22 | 0.24 | 0.23 | 0.27 | 0.22 |
| X020168 | BTF3     | IPI00221035.4 | 155  | 7  | 3  | 4  | 0.29 | 0.28 | 0.29 | 0.31 | 0.28 |
| X020168 | BUD31    | IPI00013180.2 | 172  | 6  | 5  | 5  | 0.30 | 0.28 | 0.27 | 0.32 | 0.26 |
| X020168 | C19ORF53 | IPI00022317.3 | 122  | 4  | 3  | 3  | 0.17 | 0.15 | 0.15 | 0.11 | 0.13 |
| X020168 | C1ORF57  | IPI00514501.1 | 154  | 5  | 4  | 4  | 0.28 | 0.29 | 0.28 | 0.33 | 0.30 |
| X020168 | C1QBP    | IPI00014230.1 | 377  | 6  | 4  | 5  | 0.07 | 0.09 | 0.07 | 0.12 | 0.08 |
| X020168 | C22ORF28 | IPI00550689.3 | 431  | 13 | 9  | 9  | 0.31 | 0.33 | 0.29 | 0.35 | 0.33 |
| X020168 | C6ORF66  | IPI00023064.1 | 165  | 5  | 4  | 4  | 0.21 | 0.22 | 0.17 | 0.27 | 0.21 |
| X020168 | CACYBP   | IPI00395627.3 | 302  | 7  | 6  | 6  | 0.27 | 0.26 | 0.24 | 0.32 | 0.27 |
| X020168 | CALR     | IPI00020599.1 | 538  | 17 | 11 | 12 | 0.11 | 0.14 | 0.10 | 0.19 | 0.13 |
| X020168 | CALU     | IPI00789155.1 | 299  | 6  | 4  | 4  | 0.24 | 0.32 | 0.29 | 0.25 | 0.28 |
| X020168 | CANX     | IPI00020984.2 | 672  | 17 | 13 | 14 | 0.15 | 0.18 | 0.14 | 0.24 | 0.16 |
| X020168 | CCDC124  | IPI00060627.2 | 161  | 5  | 3  | 3  | 0.33 | 0.33 | 0.32 | 0.34 | 0.37 |
| X020168 | CCT2     | IPI00297779.7 | 873  | 24 | 16 | 18 | 0.26 | 0.26 | 0.23 | 0.33 | 0.25 |
| X020168 | CCT4     | IPI00302927.6 | 696  | 17 | 13 | 13 | 0.27 | 0.28 | 0.27 | 0.35 | 0.28 |
| X020168 | CCT5     | IPI00010720.1 | 876  | 25 | 17 | 18 | 0.26 | 0.31 | 0.25 | 0.34 | 0.28 |
| X020168 | CCT6A    | IPI00027626.3 | 678  | 18 | 11 | 11 | 0.26 | 0.27 | 0.26 | 0.35 | 0.28 |
| X020168 | CCT7     | IPI00018465.1 | 838  | 22 | 12 | 13 | 0.21 | 0.24 | 0.20 | 0.28 | 0.24 |
| X020168 | CCT8     | IPI00784090.2 | 1348 | 33 | 26 | 29 | 0.24 | 0.26 | 0.23 | 0.32 | 0.26 |
| X020168 | CDC2     | IPI00026689.4 | 84   | 3  | 3  | 3  | 0.27 | 0.31 | 0.25 | 0.32 | 0.27 |
| X020168 | CDC42    | IPI00909484.1 | 271  | 7  | 4  | 4  | 0.19 | 0.21 | 0.15 | 0.22 | 0.17 |
| X020168 | CFL1     | IPI00012011.6 | 553  | 16 | 10 | 10 | 0.20 | 0.22 | 0.17 | 0.24 | 0.19 |
| X020168 | CHCHD3   | IPI00015833.1 | 271  | 8  | 6  | 6  | 0.25 | 0.24 | 0.22 | 0.31 | 0.26 |
| X020168 | CIRBP    | IPI00641579.1 | 114  | 4  | 3  | 3  | 0.13 | 0.17 | 0.10 | 0.13 | 0.13 |
| X020168 | CISD2    | IPI00166865.3 | 111  | 2  | 2  | 2  | 0.29 | 0.31 | 0.28 | 0.35 | 0.31 |
| X020168 | CKB      | IPI00022977.1 | 487  | 12 | 9  | 10 | 0.12 | 0.16 | 0.08 | 0.19 | 0.10 |
| X020168 | CLIC1    | IPI00010896.3 | 493  | 12 | 6  | 6  | 0.06 | 0.09 | 0.04 | 0.13 | 0.06 |
| X020168 | CLNS1A   | IPI00004795.1 | 117  | 2  | 2  | 2  | 0.25 | 0.24 | 0.25 | 0.30 | 0.26 |
| X020168 | CLTA     | IPI00014587.1 | 73   | 4  | 4  | 4  | 0.19 | 0.19 | 0.19 | 0.24 | 0.20 |
| X020168 | CMPK1    | IPI00219953.5 | 295  | 7  | 4  | 4  | 0.13 | 0.22 | 0.12 | 0.21 | 0.13 |
| X020168 | COMT     | IPI00011284.1 | 299  | 10 | 5  | 7  | 0.10 | 0.13 | 0.10 | 0.16 | 0.12 |
| X020168 | COPZ1    | IPI00032851.1 | 150  | 3  | 2  | 2  | 0.09 | 0.12 | 0.10 | 0.18 | 0.13 |
| X020168 | CORO1A   | IPI00010133.3 | 194  | 6  | 3  | 3  | 0.19 | 0.22 | 0.19 | 0.26 | 0.22 |

|         |         |                |     |    |    |    |      |      |      |      |      |
|---------|---------|----------------|-----|----|----|----|------|------|------|------|------|
| X020168 | CORO1B  | IPI00007058.1  | 183 | 5  | 4  | 4  | 0.25 | 0.29 | 0.26 | 0.37 | 0.29 |
| X020168 | COTL1   | IPI00017704.3  | 61  | 2  | 2  | 2  | 0.19 | 0.21 | 0.14 | 0.23 | 0.15 |
| X020168 | COX2    | IPI00916440.1  | 130 | 3  | 3  | 3  | 0.06 | 0.06 | 0.08 | 0.09 | 0.05 |
| X020168 | COX4I1  | IPI00006579.1  | 100 | 3  | 2  | 2  | 0.14 | 0.17 | 0.14 | 0.24 | 0.16 |
| X020168 | CRYZ    | IPI00000792.1  | 145 | 5  | 4  | 4  | 0.23 | 0.23 | 0.20 | 0.25 | 0.21 |
| X020168 | CS      | IPI00025366.4  | 237 | 6  | 5  | 5  | 0.08 | 0.10 | 0.07 | 0.15 | 0.10 |
| X020168 | CUTA    | IPI00034319.2  | 131 | 4  | 3  | 3  | 0.32 | 0.33 | 0.29 | 0.33 | 0.33 |
| X020168 | CYB5R3  | IPI00328415.11 | 148 | 3  | 2  | 2  | 0.16 | 0.16 | 0.15 | 0.17 | 0.13 |
| X020168 | CYC1    | IPI00029264.3  | 80  | 3  | 2  | 2  | 0.07 | 0.10 | 0.07 | 0.10 | 0.06 |
| X020168 | CYCS    | IPI00465315.6  | 127 | 5  | 4  | 5  | 0.08 | 0.09 | 0.07 | 0.14 | 0.08 |
| X020168 | DAD1    | IPI00009407.8  | 85  | 3  | 3  | 3  | 0.22 | 0.33 | 0.21 | 0.29 | 0.25 |
| X020168 | DCI     | IPI00300567.1  | 378 | 6  | 5  | 6  | 0.07 | 0.08 | 0.06 | 0.12 | 0.08 |
| X020168 | DCXR    | IPI00448095.3  | 155 | 4  | 3  | 3  | 0.29 | 0.29 | 0.26 | 0.33 | 0.28 |
| X020168 | DDOST   | IPI00297084.7  | 498 | 13 | 10 | 10 | 0.19 | 0.24 | 0.17 | 0.29 | 0.22 |
| X020168 | DDX21   | IPI00015953.3  | 363 | 9  | 5  | 5  | 0.23 | 0.22 | 0.21 | 0.25 | 0.24 |
| X020168 | DDX5    | IPI00017617.1  | 609 | 19 | 13 | 14 | 0.25 | 0.25 | 0.27 | 0.26 | 0.25 |
| X020168 | DECR1   | IPI00003482.1  | 368 | 9  | 8  | 8  | 0.14 | 0.17 | 0.14 | 0.19 | 0.14 |
| X020168 | DEK     | IPI00871695.1  | 413 | 17 | 10 | 11 | 0.30 | 0.34 | 0.38 | 0.33 | 0.38 |
| X020168 | DHX9    | IPI00844578.1  | 781 | 19 | 13 | 13 | 0.28 | 0.29 | 0.26 | 0.34 | 0.28 |
| X020168 | DLAT    | IPI00021338.2  | 485 | 12 | 9  | 9  | 0.19 | 0.21 | 0.18 | 0.28 | 0.23 |
| X020168 | DLD     | IPI00015911.1  | 438 | 11 | 8  | 8  | 0.17 | 0.18 | 0.16 | 0.24 | 0.17 |
| X020168 | DLST    | IPI00420108.5  | 192 | 7  | 4  | 4  | 0.27 | 0.28 | 0.24 | 0.30 | 0.25 |
| X020168 | DNAJB11 | IPI00008454.1  | 211 | 5  | 2  | 2  | 0.17 | 0.21 | 0.16 | 0.23 | 0.19 |
| X020168 | DNAJC19 | IPI00304306.5  | 172 | 9  | 3  | 3  | 0.32 | 0.29 | 0.32 | 0.36 | 0.33 |
| X020168 | DNAJC9  | IPI00154975.3  | 506 | 13 | 8  | 8  | 0.18 | 0.27 | 0.21 | 0.27 | 0.22 |
| X020168 | DPM1    | IPI00796864.1  | 88  | 2  | 2  | 2  | 0.32 | 0.23 | 0.23 | 0.32 | 0.25 |
| X020168 | DRG1    | IPI00031836.3  | 539 | 12 | 9  | 9  | 0.29 | 0.29 | 0.30 | 0.34 | 0.31 |
| X020168 | ECHS1   | IPI00024993.4  | 161 | 5  | 2  | 2  | 0.21 | 0.33 | 0.22 | 0.28 | 0.23 |
| X020168 | EEF1B2  | IPI00178440.3  | 335 | 9  | 5  | 6  | 0.20 | 0.20 | 0.22 | 0.27 | 0.24 |
| X020168 | EEF1D   | IPI00642971.3  | 575 | 13 | 9  | 9  | 0.25 | 0.29 | 0.23 | 0.32 | 0.26 |
| X020168 | EEF1G   | IPI00000875.7  | 607 | 19 | 14 | 15 | 0.29 | 0.31 | 0.28 | 0.40 | 0.32 |
| X020168 | EIF2B2  | IPI00028083.1  | 75  | 3  | 2  | 2  | 0.24 | 0.23 | 0.19 | 0.34 | 0.26 |
| X020168 | EIF2S1  | IPI00219678.3  | 277 | 8  | 5  | 6  | 0.27 | 0.29 | 0.25 | 0.31 | 0.35 |
| X020168 | EIF2S2  | IPI00021728.3  | 525 | 12 | 10 | 11 | 0.33 | 0.30 | 0.29 | 0.35 | 0.39 |
| X020168 | EIF2S3  | IPI00297982.7  | 458 | 11 | 8  | 8  | 0.25 | 0.24 | 0.22 | 0.27 | 0.31 |
| X020168 | EIF3I   | IPI00012795.3  | 306 | 8  | 6  | 6  | 0.29 | 0.35 | 0.29 | 0.33 | 0.32 |
| X020168 | EIF4A1  | IPI00025491.1  | 757 | 18 | 4  | 5  | 0.19 | 0.28 | 0.20 | 0.26 | 0.21 |
| X020168 | EIF4A3  | IPI00009328.4  | 361 | 8  | 7  | 7  | 0.16 | 0.21 | 0.18 | 0.24 | 0.18 |
| X020168 | EIF4B   | IPI00012079.3  | 341 | 12 | 6  | 6  | 0.31 | 0.32 | 0.34 | 0.37 | 0.33 |
| X020168 | EIF4G2  | IPI00015952.2  | 68  | 3  | 2  | 2  | 0.34 | 0.37 | 0.28 | 0.54 | 0.45 |



|         |          |                |     |    |    |    |      |      |      |      |      |
|---------|----------|----------------|-----|----|----|----|------|------|------|------|------|
| X020168 | EIF4H    | IPI00014263.1  | 268 | 6  | 3  | 4  | 0.26 | 0.24 | 0.23 | 0.27 | 0.26 |
| X020168 | EIF6     | IPI00010105.1  | 116 | 3  | 2  | 2  | 0.19 | 0.23 | 0.16 | 0.16 | 0.16 |
| X020168 | ELAVL1   | IPI00301936.4  | 247 | 8  | 5  | 5  | 0.12 | 0.12 | 0.13 | 0.17 | 0.12 |
| X020168 | ETF1     | IPI00429191.3  | 256 | 6  | 5  | 5  | 0.15 | 0.20 | 0.16 | 0.24 | 0.17 |
| X020168 | ETFFA    | IPI00010810.1  | 352 | 11 | 8  | 8  | 0.10 | 0.12 | 0.10 | 0.20 | 0.12 |
| X020168 | ETFB     | IPI00556451.2  | 146 | 4  | 3  | 3  | 0.16 | 0.19 | 0.15 | 0.21 | 0.14 |
| X020168 | EWSR1    | IPI00009841.5  | 170 | 6  | 5  | 5  | 0.29 | 0.24 | 0.35 | 0.24 | 0.35 |
| X020168 | EXOSC6   | IPI00073602.1  | 199 | 4  | 3  | 3  | 0.27 | 0.29 | 0.27 | 0.31 | 0.27 |
| X020168 | EXOSC9   | IPI00029697.3  | 83  | 3  | 2  | 2  | 0.27 | 0.26 | 0.28 | 0.28 | 0.28 |
| X020168 | FAF2     | IPI00172656.6  | 68  | 2  | 2  | 2  | 0.20 | 0.20 | 0.21 | 0.26 | 0.23 |
| X020168 | FAM62A   | IPI00746655.1  | 429 | 13 | 8  | 8  | 0.28 | 0.27 | 0.28 | 0.38 | 0.30 |
| X020168 | FDXR     | IPI00911050.1  | 104 | 5  | 3  | 3  | 0.21 | 0.25 | 0.20 | 0.24 | 0.21 |
| X020168 | FEN1     | IPI00026215.1  | 264 | 10 | 5  | 6  | 0.26 | 0.22 | 0.24 | 0.27 | 0.28 |
| X020168 | FERMT3   | IPI00397834.1  | 311 | 7  | 6  | 6  | 0.18 | 0.18 | 0.14 | 0.24 | 0.17 |
| X020168 | FH       | IPI00296053.3  | 609 | 14 | 9  | 9  | 0.12 | 0.14 | 0.10 | 0.19 | 0.11 |
| X020168 | FKBP3    | IPI00024157.1  | 203 | 7  | 4  | 4  | 0.31 | 0.29 | 0.28 | 0.34 | 0.32 |
| X020168 | FSCN1    | IPI00747810.2  | 430 | 11 | 9  | 9  | 0.25 | 0.28 | 0.22 | 0.33 | 0.23 |
| X020168 | FUBP1    | IPI00641948.2  | 419 | 14 | 10 | 10 | 0.24 | 0.21 | 0.21 | 0.30 | 0.22 |
| X020168 | G3BP2    | IPI00009057.2  | 174 | 6  | 2  | 2  | 0.20 | 0.19 | 0.19 | 0.25 | 0.19 |
| X020168 | GANAB    | IPI00383581.4  | 490 | 15 | 11 | 12 | 0.20 | 0.19 | 0.16 | 0.24 | 0.19 |
| X020168 | GAR1     | IPI00872985.1  | 203 | 7  | 6  | 6  | 0.21 | 0.17 | 0.16 | 0.18 | 0.16 |
| X020168 | GLUD1    | IPI00016801.1  | 445 | 9  | 7  | 7  | 0.24 | 0.25 | 0.21 | 0.28 | 0.23 |
| X020168 | GNB2L1   | IPI00641950.4  | 848 | 19 | 17 | 18 | 0.28 | 0.32 | 0.28 | 0.33 | 0.30 |
| X020168 | GOT2     | IPI00018206.3  | 280 | 8  | 5  | 5  | 0.18 | 0.20 | 0.14 | 0.22 | 0.16 |
| X020168 | GSTK1    | IPI00440703.1  | 188 | 4  | 2  | 2  | 0.12 | 0.20 | 0.18 | 0.25 | 0.19 |
| X020168 | GSTO1    | IPI00019755.3  | 216 | 7  | 5  | 5  | 0.18 | 0.25 | 0.16 | 0.23 | 0.17 |
| X020168 | GSTP1    | IPI00219757.13 | 670 | 13 | 10 | 12 | 0.12 | 0.19 | 0.11 | 0.17 | 0.12 |
| X020168 | GTF2E2   | IPI00019981.1  | 66  | 2  | 2  | 2  | 0.33 | 0.34 | 0.37 | 0.34 | 0.38 |
| X020168 | H1FX     | IPI00021924.1  | 123 | 3  | 3  | 3  | 0.20 | 0.25 | 0.21 | 0.19 | 0.22 |
| X020168 | H2AFX    | IPI00219037.5  | 129 | 3  | 2  | 2  | 0.09 | 0.11 | 0.06 | 0.13 | 0.06 |
| X020168 | H2AFY    | IPI00304171.6  | 220 | 5  | 3  | 3  | 0.10 | 0.13 | 0.13 | 0.18 | 0.14 |
| X020168 | HADH     | IPI00298406.3  | 220 | 7  | 5  | 5  | 0.22 | 0.22 | 0.22 | 0.27 | 0.22 |
| X020168 | HADHB    | IPI00022793.5  | 394 | 9  | 7  | 7  | 0.17 | 0.20 | 0.19 | 0.26 | 0.21 |
| X020168 | HAT1     | IPI00024719.1  | 74  | 3  | 2  | 2  | 0.30 | 0.29 | 0.29 | 0.38 | 0.30 |
| X020168 | HBE1     | IPI00217471.3  | 192 | 4  | 3  | 3  | 0.10 | 0.12 | 0.08 | 0.17 | 0.09 |
| X020168 | HBZ      | IPI00217473.5  | 419 | 9  | 7  | 8  | 0.10 | 0.11 | 0.10 | 0.15 | 0.11 |
| X020168 | HCG_2004 | IPI00478208.2  | 245 | 7  | 5  | 6  | 0.16 | 0.15 | 0.14 | 0.16 | 0.13 |
| X020168 | HINT1    | IPI00239077.5  | 178 | 5  | 3  | 3  | 0.13 | 0.14 | 0.13 | 0.18 | 0.15 |
| X020168 | HMGB1    | IPI00419258.4  | 493 | 21 | 6  | 9  | 0.28 | 0.27 | 0.29 | 0.31 | 0.28 |
| X020168 | HNRNPA0  | IPI00011913.1  | 186 | 5  | 3  | 3  | 0.20 | 0.24 | 0.22 | 0.24 | 0.21 |

|         |          |               |      |    |    |    |      |      |      |      |      |
|---------|----------|---------------|------|----|----|----|------|------|------|------|------|
| X020168 | HNRNPA2  | IPI00874030.3 | 825  | 22 | 15 | 19 | 0.08 | 0.09 | 0.08 | 0.13 | 0.10 |
| X020168 | HNRNPA3  | IPI00419373.1 | 436  | 20 | 9  | 12 | 0.15 | 0.16 | 0.14 | 0.21 | 0.16 |
| X020168 | HNRNPC   | IPI00477313.3 | 595  | 18 | 11 | 14 | 0.08 | 0.09 | 0.09 | 0.15 | 0.10 |
| X020168 | HNRNPD   | IPI00028888.1 | 213  | 12 | 5  | 6  | 0.14 | 0.14 | 0.14 | 0.19 | 0.14 |
| X020168 | HNRNPF   | IPI00003881.5 | 538  | 14 | 10 | 11 | 0.28 | 0.29 | 0.28 | 0.34 | 0.31 |
| X020168 | HNRNPH1  | IPI00479191.2 | 827  | 21 | 7  | 9  | 0.30 | 0.30 | 0.27 | 0.35 | 0.30 |
| X020168 | HNRNPH2  | IPI00917181.1 | 165  | 6  | 4  | 4  | 0.12 | 0.12 | 0.11 | 0.14 | 0.11 |
| X020168 | HNRNPH3  | IPI00013877.2 | 542  | 11 | 9  | 10 | 0.11 | 0.11 | 0.10 | 0.16 | 0.12 |
| X020168 | HNRNPK   | IPI00216746.1 | 812  | 24 | 15 | 20 | 0.12 | 0.12 | 0.11 | 0.17 | 0.13 |
| X020168 | HNRNPL   | IPI00027834.3 | 582  | 15 | 8  | 8  | 0.12 | 0.17 | 0.11 | 0.17 | 0.14 |
| X020168 | HNRNPM   | IPI00171903.2 | 994  | 47 | 21 | 27 | 0.21 | 0.22 | 0.19 | 0.27 | 0.21 |
| X020168 | HNRNPUL  | IPI00456887.2 | 259  | 7  | 4  | 4  | 0.15 | 0.17 | 0.15 | 0.22 | 0.17 |
| X020168 | HNRPA1L  | IPI00215965.2 | 805  | 24 | 11 | 14 | 0.09 | 0.10 | 0.09 | 0.14 | 0.11 |
| X020168 | HNRPDL   | IPI00011274.3 | 376  | 12 | 5  | 5  | 0.11 | 0.16 | 0.11 | 0.18 | 0.13 |
| X020168 | HP1BP3   | IPI00642238.4 | 70   | 3  | 3  | 3  | 0.27 | 0.26 | 0.24 | 0.22 | 0.30 |
| X020168 | HSD17B10 | IPI00017726.1 | 642  | 10 | 8  | 9  | 0.22 | 0.22 | 0.21 | 0.26 | 0.23 |
| X020168 | HSD17B11 | IPI00329598.2 | 69   | 3  | 2  | 2  | 0.16 | 0.11 | 0.14 | 0.19 | 0.14 |
| X020168 | HSP90AA1 | IPI00382470.3 | 816  | 25 | 14 | 17 | 0.30 | 0.34 | 0.28 | 0.41 | 0.34 |
| X020168 | HSP90B1  | IPI00027230.3 | 941  | 22 | 18 | 18 | 0.21 | 0.23 | 0.20 | 0.32 | 0.22 |
| X020168 | HSPD1    | IPI00784154.1 | 1631 | 36 | 25 | 29 | 0.23 | 0.25 | 0.22 | 0.34 | 0.24 |
| X020168 | HSPE1    | IPI00220362.5 | 279  | 10 | 8  | 10 | 0.07 | 0.07 | 0.06 | 0.11 | 0.07 |
| X020168 | HYOU1    | IPI00000877.1 | 428  | 11 | 6  | 6  | 0.18 | 0.19 | 0.16 | 0.26 | 0.18 |
| X020168 | IDH2     | IPI00011107.2 | 242  | 10 | 4  | 4  | 0.18 | 0.20 | 0.13 | 0.23 | 0.19 |
| X020168 | IDH3A    | IPI00030702.1 | 153  | 5  | 2  | 2  | 0.18 | 0.16 | 0.16 | 0.19 | 0.15 |
| X020168 | IGF2BP1  | IPI00008557.5 | 529  | 15 | 12 | 12 | 0.13 | 0.13 | 0.14 | 0.21 | 0.16 |
| X020168 | IGF2BP2  | IPI00179713.6 | 173  | 6  | 2  | 2  | 0.19 | 0.15 | 0.19 | 0.27 | 0.19 |
| X020168 | ILF2     | IPI00872107.1 | 385  | 8  | 7  | 8  | 0.17 | 0.16 | 0.15 | 0.23 | 0.16 |
| X020168 | JTV1     | IPI00011916.1 | 265  | 8  | 5  | 5  | 0.31 | 0.35 | 0.32 | 0.39 | 0.35 |
| X020168 | KHDRBS1  | IPI00008575.3 | 336  | 14 | 11 | 11 | 0.31 | 0.27 | 0.36 | 0.33 | 0.34 |
| X020168 | LBR      | IPI00292135.1 | 153  | 8  | 4  | 4  | 0.20 | 0.24 | 0.22 | 0.28 | 0.24 |
| X020168 | LETM1    | IPI00017592.1 | 193  | 5  | 4  | 4  | 0.34 | 0.31 | 0.33 | 0.38 | 0.36 |
| X020168 | LMAN1    | IPI00026530.4 | 146  | 5  | 2  | 2  | 0.24 | 0.26 | 0.22 | 0.29 | 0.22 |
| X020168 | LOC44249 | IPI00554481.1 | 204  | 7  | 5  | 5  | 0.19 | 0.20 | 0.15 | 0.22 | 0.19 |
| X020168 | LOC65078 | IPI00887241.1 | 135  | 4  | 3  | 4  | 0.28 | 0.32 | 0.28 | 0.35 | 0.30 |
| X020168 | LOC65418 | IPI00887678.1 | 557  | 18 | 9  | 13 | 0.18 | 0.20 | 0.17 | 0.23 | 0.18 |
| X020168 | LOC72865 | IPI00398964.2 | 429  | 14 | 9  | 9  | 0.11 | 0.15 | 0.11 | 0.15 | 0.12 |
| X020168 | LONP1    | IPI00005158.1 | 307  | 11 | 4  | 4  | 0.32 | 0.28 | 0.25 | 0.34 | 0.29 |
| X020168 | LRPPRC   | IPI00783271.1 | 703  | 16 | 11 | 11 | 0.26 | 0.26 | 0.23 | 0.35 | 0.26 |
| X020168 | LSM12    | IPI00867714.1 | 83   | 2  | 2  | 2  | 0.29 | 0.30 | 0.30 | 0.32 | 0.37 |
| X020168 | LSM2     | IPI00032460.3 | 148  | 2  | 2  | 2  | 0.12 | 0.15 | 0.13 | 0.17 | 0.14 |

|         |         |               |     |    |    |    |      |      |      |      |      |
|---------|---------|---------------|-----|----|----|----|------|------|------|------|------|
| X020168 | LSM3    | IPI00219229.3 | 113 | 4  | 2  | 2  | 0.16 | 0.16 | 0.14 | 0.20 | 0.15 |
| X020168 | LSM8    | IPI00219871.5 | 139 | 4  | 2  | 2  | 0.26 | 0.23 | 0.21 | 0.30 | 0.24 |
| X020168 | LYAR    | IPI00015838.3 | 290 | 9  | 7  | 7  | 0.31 | 0.32 | 0.31 | 0.30 | 0.30 |
| X020168 | M11S1   | IPI00783872.2 | 319 | 8  | 4  | 4  | 0.37 | 0.33 | 0.36 | 0.35 | 0.39 |
| X020168 | M6PR    | IPI00025049.1 | 103 | 4  | 2  | 2  | 0.15 | 0.18 | 0.11 | 0.15 | 0.12 |
| X020168 | MACROD1 | IPI00155601.1 | 106 | 3  | 2  | 2  | 0.27 | 0.27 | 0.23 | 0.29 | 0.27 |
| X020168 | MAGOH   | IPI00059292.3 | 247 | 7  | 6  | 6  | 0.18 | 0.19 | 0.18 | 0.21 | 0.18 |
| X020168 | MAP1B   | IPI00008868.3 | 151 | 7  | 4  | 4  | 0.24 | 0.25 | 0.26 | 0.30 | 0.24 |
| X020168 | MAPRE1  | IPI00017596.3 | 260 | 6  | 3  | 3  | 0.28 | 0.27 | 0.25 | 0.34 | 0.28 |
| X020168 | MBD3    | IPI00439194.1 | 77  | 2  | 2  | 2  | 0.38 | 0.36 | 0.35 | 0.36 | 0.40 |
| X020168 | MBNL1   | IPI00021692.2 | 102 | 3  | 3  | 3  | 0.19 | 0.20 | 0.17 | 0.24 | 0.20 |
| X020168 | MCM2    | IPI00184330.5 | 381 | 10 | 7  | 7  | 0.29 | 0.29 | 0.28 | 0.37 | 0.29 |
| X020168 | MCM4    | IPI00018349.5 | 259 | 10 | 4  | 5  | 0.22 | 0.26 | 0.22 | 0.32 | 0.25 |
| X020168 | MCM6    | IPI00031517.1 | 551 | 18 | 12 | 12 | 0.25 | 0.27 | 0.24 | 0.31 | 0.27 |
| X020168 | MCTS1   | IPI00645446.1 | 92  | 4  | 3  | 4  | 0.34 | 0.35 | 0.31 | 0.34 | 0.34 |
| X020168 | MDH2    | IPI00291006.2 | 953 | 21 | 18 | 19 | 0.08 | 0.11 | 0.07 | 0.13 | 0.08 |
| X020168 | MOBKL1B | IPI00873106.1 | 89  | 2  | 2  | 2  | 0.11 | 0.09 | 0.09 | 0.15 | 0.10 |
| X020168 | MOV10   | IPI00444452.3 | 193 | 7  | 4  | 4  | 0.37 | 0.30 | 0.34 | 0.37 | 0.35 |
| X020168 | MRPL11  | IPI00007001.1 | 158 | 4  | 2  | 2  | 0.19 | 0.20 | 0.18 | 0.25 | 0.18 |
| X020168 | MRPL12  | IPI00005537.2 | 108 | 2  | 2  | 2  | 0.16 | 0.16 | 0.16 | 0.18 | 0.14 |
| X020168 | MRPL39  | IPI00084571.4 | 218 | 6  | 3  | 3  | 0.27 | 0.28 | 0.24 | 0.32 | 0.29 |
| X020168 | MRPL40  | IPI00099871.1 | 124 | 5  | 3  | 3  | 0.31 | 0.34 | 0.31 | 0.35 | 0.34 |
| X020168 | MRPL48  | IPI00295066.4 | 104 | 2  | 2  | 2  | 0.21 | 0.21 | 0.22 | 0.25 | 0.25 |
| X020168 | MRPL49  | IPI00013195.1 | 60  | 2  | 2  | 2  | 0.28 | 0.28 | 0.30 | 0.33 | 0.29 |
| X020168 | MRPL53  | IPI00061531.4 | 55  | 2  | 2  | 2  | 0.22 | 0.25 | 0.24 | 0.27 | 0.25 |
| X020168 | MRPS2   | IPI00006970.2 | 46  | 2  | 2  | 2  | 0.15 | 0.17 | 0.18 | 0.25 | 0.15 |
| X020168 | MRPS23  | IPI00032881.2 | 124 | 4  | 4  | 4  | 0.31 | 0.32 | 0.31 | 0.33 | 0.33 |
| X020168 | MSN     | IPI00219365.3 | 749 | 26 | 15 | 16 | 0.25 | 0.29 | 0.24 | 0.37 | 0.26 |
| X020168 | MTCH2   | IPI00003833.3 | 113 | 4  | 3  | 3  | 0.11 | 0.11 | 0.12 | 0.25 | 0.14 |
| X020168 | MUTED   | IPI00171438.2 | 111 | 4  | 2  | 2  | 0.31 | 0.29 | 0.29 | 0.31 | 0.28 |
| X020168 | NARS    | IPI00306960.3 | 354 | 9  | 8  | 8  | 0.24 | 0.26 | 0.22 | 0.31 | 0.26 |
| X020168 | NASP    | IPI00332499.1 | 461 | 12 | 9  | 9  | 0.23 | 0.24 | 0.22 | 0.31 | 0.24 |
| X020168 | NDUFA6  | IPI00419266.1 | 77  | 2  | 2  | 2  | 0.13 | 0.17 | 0.12 | 0.17 | 0.13 |
| X020168 | NDUFA9  | IPI00003968.1 | 153 | 6  | 2  | 2  | 0.28 | 0.23 | 0.26 | 0.33 | 0.22 |
| X020168 | NDUFB10 | IPI00479905.5 | 201 | 4  | 4  | 4  | 0.14 | 0.15 | 0.13 | 0.20 | 0.16 |
| X020168 | NDUFB5  | IPI00013459.1 | 61  | 3  | 2  | 2  | 0.15 | 0.16 | 0.14 | 0.24 | 0.14 |
| X020168 | NDUFS2  | IPI00025239.2 | 104 | 6  | 4  | 4  | 0.18 | 0.18 | 0.19 | 0.30 | 0.19 |
| X020168 | NDUFS3  | IPI00025796.3 | 248 | 6  | 5  | 5  | 0.25 | 0.23 | 0.22 | 0.29 | 0.20 |
| X020168 | NDUFS8  | IPI00010845.3 | 121 | 5  | 2  | 3  | 0.36 | 0.24 | 0.22 | 0.30 | 0.33 |
| X020168 | NDUFV2  | IPI00646556.1 | 171 | 4  | 2  | 2  | 0.20 | 0.18 | 0.18 | 0.25 | 0.18 |

|         |         |               |      |    |    |    |      |      |      |      |      |
|---------|---------|---------------|------|----|----|----|------|------|------|------|------|
| X020168 | NHP2L1  | IPI00893746.1 | 151  | 4  | 3  | 3  | 0.17 | 0.20 | 0.20 | 0.22 | 0.18 |
| X020168 | NME1-NM | IPI00604590.3 | 277  | 10 | 5  | 6  | 0.19 | 0.25 | 0.17 | 0.26 | 0.18 |
| X020168 | NMT1    | IPI00329692.3 | 230  | 8  | 5  | 5  | 0.31 | 0.26 | 0.25 | 0.38 | 0.28 |
| X020168 | NOL7    | IPI00007729.1 | 164  | 5  | 4  | 4  | 0.30 | 0.28 | 0.24 | 0.28 | 0.24 |
| X020168 | NPM1    | IPI00549248.4 | 603  | 17 | 12 | 15 | 0.29 | 0.27 | 0.27 | 0.36 | 0.29 |
| X020168 | NUDC    | IPI00550746.4 | 516  | 12 | 8  | 8  | 0.33 | 0.32 | 0.31 | 0.39 | 0.35 |
| X020168 | OLA1    | IPI00916847.1 | 259  | 7  | 3  | 3  | 0.27 | 0.26 | 0.20 | 0.34 | 0.24 |
| X020168 | P4HB    | IPI00010796.1 | 710  | 19 | 14 | 15 | 0.16 | 0.21 | 0.16 | 0.24 | 0.17 |
| X020168 | PA2G4   | IPI00807557.1 | 763  | 26 | 14 | 17 | 0.14 | 0.15 | 0.12 | 0.20 | 0.14 |
| X020168 | PAICS   | IPI00217223.1 | 660  | 14 | 11 | 12 | 0.23 | 0.24 | 0.20 | 0.30 | 0.22 |
| X020168 | PARP1   | IPI00449049.5 | 2032 | 65 | 39 | 45 | 0.25 | 0.25 | 0.29 | 0.27 | 0.32 |
| X020168 | PCBP2   | IPI00796337.1 | 401  | 8  | 5  | 5  | 0.23 | 0.23 | 0.22 | 0.29 | 0.23 |
| X020168 | PCNA    | IPI00021700.3 | 101  | 4  | 2  | 2  | 0.30 | 0.31 | 0.21 | 0.28 | 0.25 |
| X020168 | PDCD5   | IPI00908931.1 | 184  | 7  | 3  | 3  | 0.28 | 0.27 | 0.25 | 0.32 | 0.28 |
| X020168 | PDHB    | IPI00003925.6 | 230  | 5  | 5  | 5  | 0.13 | 0.14 | 0.11 | 0.16 | 0.12 |
| X020168 | PDIA3   | IPI00025252.1 | 1105 | 24 | 21 | 22 | 0.19 | 0.20 | 0.18 | 0.26 | 0.20 |
| X020168 | PDIA4   | IPI00009904.1 | 503  | 16 | 7  | 7  | 0.20 | 0.22 | 0.21 | 0.27 | 0.23 |
| X020168 | PDIA6   | IPI00299571.5 | 635  | 14 | 10 | 10 | 0.19 | 0.20 | 0.18 | 0.26 | 0.19 |
| X020168 | PFDN1   | IPI00000051.4 | 58   | 2  | 2  | 2  | 0.26 | 0.24 | 0.22 | 0.30 | 0.22 |
| X020168 | PFDN2   | IPI00006052.3 | 308  | 7  | 5  | 5  | 0.29 | 0.32 | 0.28 | 0.33 | 0.30 |
| X020168 | PFDN6   | IPI00005657.1 | 230  | 6  | 4  | 4  | 0.22 | 0.24 | 0.20 | 0.27 | 0.23 |
| X020168 | PFN1    | IPI00216691.5 | 344  | 9  | 5  | 7  | 0.07 | 0.08 | 0.05 | 0.11 | 0.06 |
| X020168 | PGD     | IPI00747533.2 | 445  | 14 | 9  | 9  | 0.12 | 0.16 | 0.11 | 0.23 | 0.13 |
| X020168 | PGRMC1  | IPI00220739.3 | 110  | 4  | 2  | 2  | 0.23 | 0.29 | 0.29 | 0.29 | 0.28 |
| X020168 | PHGDH   | IPI00011200.5 | 735  | 14 | 12 | 12 | 0.25 | 0.27 | 0.24 | 0.33 | 0.27 |
| X020168 | PITPNB  | IPI00395939.3 | 76   | 4  | 2  | 2  | 0.31 | 0.31 | 0.26 | 0.32 | 0.33 |
| X020168 | PMPCB   | IPI00289535.6 | 98   | 2  | 2  | 2  | 0.26 | 0.29 | 0.22 | 0.28 | 0.28 |
| X020168 | POLR2L  | IPI00003311.1 | 97   | 3  | 2  | 2  | 0.28 | 0.26 | 0.22 | 0.31 | 0.24 |
| X020168 | PPA1    | IPI00015018.1 | 270  | 7  | 5  | 5  | 0.23 | 0.24 | 0.22 | 0.28 | 0.23 |
| X020168 | PPIB    | IPI00646304.4 | 642  | 21 | 14 | 17 | 0.25 | 0.24 | 0.26 | 0.26 | 0.25 |
| X020168 | PPIF    | IPI00026519.1 | 78   | 4  | 2  | 2  | 0.18 | 0.20 | 0.16 | 0.22 | 0.19 |
| X020168 | PRDX2   | IPI00027350.3 | 485  | 12 | 8  | 8  | 0.17 | 0.24 | 0.16 | 0.20 | 0.18 |
| X020168 | PRKCSH  | IPI00026154.3 | 353  | 13 | 7  | 7  | 0.20 | 0.19 | 0.17 | 0.21 | 0.17 |
| X020168 | PSMA2   | IPI00219622.3 | 151  | 5  | 2  | 2  | 0.19 | 0.28 | 0.22 | 0.24 | 0.22 |
| X020168 | PSMA3   | IPI00419249.5 | 328  | 9  | 7  | 7  | 0.22 | 0.25 | 0.18 | 0.23 | 0.19 |
| X020168 | PSMA4   | IPI00299155.5 | 286  | 10 | 5  | 5  | 0.20 | 0.27 | 0.19 | 0.25 | 0.20 |
| X020168 | PSMA5   | IPI00291922.2 | 98   | 3  | 2  | 2  | 0.21 | 0.28 | 0.18 | 0.24 | 0.23 |
| X020168 | PSMA6   | IPI00029623.1 | 361  | 7  | 6  | 6  | 0.20 | 0.27 | 0.20 | 0.23 | 0.21 |
| X020168 | PSMA7   | IPI00024175.3 | 346  | 8  | 4  | 4  | 0.20 | 0.29 | 0.17 | 0.25 | 0.21 |
| X020168 | PSMB2   | IPI00028006.1 | 203  | 6  | 4  | 5  | 0.22 | 0.28 | 0.19 | 0.26 | 0.22 |

|         |         |               |     |    |   |    |      |      |      |      |      |
|---------|---------|---------------|-----|----|---|----|------|------|------|------|------|
| X020168 | PSMB6   | IPI00000811.2 | 195 | 4  | 4 | 4  | 0.23 | 0.29 | 0.20 | 0.23 | 0.25 |
| X020168 | PSMB7   | IPI00003217.3 | 157 | 4  | 4 | 4  | 0.17 | 0.21 | 0.16 | 0.20 | 0.17 |
| X020168 | PSMC1   | IPI00011126.6 | 191 | 5  | 3 | 3  | 0.23 | 0.23 | 0.22 | 0.28 | 0.23 |
| X020168 | PSMC2   | IPI00021435.3 | 429 | 11 | 8 | 8  | 0.21 | 0.26 | 0.21 | 0.33 | 0.26 |
| X020168 | PSMC6   | IPI00021926.3 | 291 | 7  | 4 | 4  | 0.25 | 0.27 | 0.23 | 0.30 | 0.26 |
| X020168 | PSMD11  | IPI00105598.3 | 333 | 8  | 6 | 6  | 0.24 | 0.22 | 0.22 | 0.30 | 0.23 |
| X020168 | PSMD13  | IPI00375380.4 | 323 | 9  | 5 | 5  | 0.18 | 0.21 | 0.17 | 0.26 | 0.20 |
| X020168 | PSMD3   | IPI00011603.2 | 457 | 12 | 5 | 5  | 0.21 | 0.23 | 0.20 | 0.30 | 0.21 |
| X020168 | PSMD4   | IPI00216247.2 | 121 | 2  | 2 | 2  | 0.20 | 0.17 | 0.19 | 0.29 | 0.21 |
| X020168 | PSMD6   | IPI00014151.3 | 131 | 4  | 3 | 3  | 0.26 | 0.29 | 0.26 | 0.37 | 0.30 |
| X020168 | PSMG2   | IPI00644482.1 | 193 | 6  | 3 | 3  | 0.27 | 0.28 | 0.25 | 0.35 | 0.28 |
| X020168 | PTBP1   | IPI00183626.8 | 438 | 11 | 5 | 6  | 0.25 | 0.27 | 0.25 | 0.31 | 0.29 |
| X020168 | PTMA    | IPI00827535.1 | 111 | 2  | 2 | 2  | 0.22 | 0.21 | 0.20 | 0.19 | 0.26 |
| X020168 | PTMS    | IPI00783736.1 | 111 | 2  | 2 | 2  | 0.34 | 0.31 | 0.31 | 0.35 | 0.33 |
| X020168 | PTPLAD1 | IPI00008998.3 | 149 | 5  | 3 | 3  | 0.35 | 0.38 | 0.38 | 0.44 | 0.48 |
| X020168 | QKI     | IPI00410118.1 | 70  | 3  | 2 | 2  | 0.24 | 0.22 | 0.21 | 0.29 | 0.21 |
| X020168 | RAB10   | IPI00016513.5 | 188 | 6  | 6 | 6  | 0.14 | 0.16 | 0.12 | 0.19 | 0.11 |
| X020168 | RAB11B  | IPI00020436.4 | 358 | 9  | 6 | 6  | 0.12 | 0.16 | 0.11 | 0.17 | 0.13 |
| X020168 | RAB1A   | IPI00005719.1 | 91  | 3  | 2 | 3  | 0.19 | 0.18 | 0.15 | 0.21 | 0.15 |
| X020168 | RAB1B   | IPI00008964.3 | 280 | 8  | 3 | 3  | 0.16 | 0.21 | 0.14 | 0.21 | 0.15 |
| X020168 | RAB2A   | IPI00873632.1 | 220 | 4  | 3 | 3  | 0.17 | 0.26 | 0.14 | 0.21 | 0.17 |
| X020168 | RAB5C   | IPI00016339.4 | 267 | 6  | 4 | 4  | 0.22 | 0.22 | 0.16 | 0.26 | 0.19 |
| X020168 | RALY    | IPI00011268.2 | 387 | 11 | 8 | 8  | 0.17 | 0.18 | 0.17 | 0.22 | 0.18 |
| X020168 | RAN     | IPI00792352.1 | 373 | 9  | 7 | 7  | 0.15 | 0.18 | 0.13 | 0.21 | 0.15 |
| X020168 | RANBP1  | IPI00878611.1 | 142 | 6  | 2 | 2  | 0.12 | 0.14 | 0.11 | 0.20 | 0.13 |
| X020168 | RBBP4   | IPI00328319.8 | 370 | 9  | 4 | 4  | 0.20 | 0.20 | 0.32 | 0.26 | 0.24 |
| X020168 | RBM8A   | IPI00001757.1 | 167 | 4  | 4 | 4  | 0.26 | 0.24 | 0.24 | 0.28 | 0.24 |
| X020168 | RCC1    | IPI00001661.3 | 179 | 5  | 2 | 2  | 0.19 | 0.19 | 0.12 | 0.22 | 0.14 |
| X020168 | RHOA    | IPI00478231.2 | 215 | 6  | 5 | 5  | 0.17 | 0.20 | 0.14 | 0.19 | 0.17 |
| X020168 | RHOG    | IPI00017342.1 | 44  | 2  | 2 | 2  | 0.20 | 0.20 | 0.17 | 0.24 | 0.21 |
| X020168 | RNH1    | IPI00550069.3 | 509 | 11 | 7 | 7  | 0.14 | 0.19 | 0.13 | 0.22 | 0.15 |
| X020168 | RPL10A  | IPI00827508.2 | 506 | 17 | 8 | 11 | 0.17 | 0.18 | 0.17 | 0.20 | 0.16 |
| X020168 | RPL11   | IPI00376798.3 | 127 | 5  | 2 | 2  | 0.30 | 0.33 | 0.29 | 0.26 | 0.31 |
| X020168 | RPL12   | IPI00024933.3 | 601 | 15 | 9 | 9  | 0.17 | 0.19 | 0.17 | 0.21 | 0.17 |
| X020168 | RPL13   | IPI00465361.4 | 397 | 14 | 7 | 8  | 0.29 | 0.28 | 0.25 | 0.31 | 0.27 |
| X020168 | RPL14   | IPI00555744.6 | 264 | 9  | 4 | 4  | 0.19 | 0.20 | 0.17 | 0.21 | 0.18 |
| X020168 | RPL18   | IPI00215719.6 | 330 | 9  | 6 | 6  | 0.28 | 0.28 | 0.26 | 0.33 | 0.31 |
| X020168 | RPL18A  | IPI00472864.2 | 347 | 8  | 7 | 7  | 0.12 | 0.10 | 0.10 | 0.14 | 0.10 |
| X020168 | RPL23A  | IPI00789159.1 | 192 | 4  | 3 | 3  | 0.17 | 0.16 | 0.16 | 0.14 | 0.12 |
| X020168 | RPL30   | IPI00219156.7 | 260 | 7  | 5 | 7  | 0.21 | 0.24 | 0.23 | 0.25 | 0.25 |

|         |           |               |     |    |    |    |      |      |      |      |      |
|---------|-----------|---------------|-----|----|----|----|------|------|------|------|------|
| X020168 | RPL36     | IPI00216237.5 | 85  | 3  | 2  | 2  | 0.24 | 0.25 | 0.21 | 0.29 | 0.26 |
| X020168 | RPL38     | IPI00215790.6 | 140 | 7  | 2  | 3  | 0.25 | 0.27 | 0.24 | 0.26 | 0.24 |
| X020168 | RPL5      | IPI00000494.6 | 486 | 18 | 8  | 9  | 0.20 | 0.21 | 0.16 | 0.20 | 0.18 |
| X020168 | RPL7      | IPI00872387.1 | 422 | 12 | 9  | 9  | 0.12 | 0.14 | 0.14 | 0.17 | 0.13 |
| X020168 | RPLP0-LIK | IPI00871646.1 | 595 | 17 | 13 | 14 | 0.22 | 0.24 | 0.22 | 0.26 | 0.22 |
| X020168 | RPN1      | IPI00025874.2 | 648 | 17 | 13 | 13 | 0.30 | 0.34 | 0.27 | 0.36 | 0.32 |
| X020168 | RPN2      | IPI00028635.4 | 244 | 5  | 4  | 4  | 0.23 | 0.26 | 0.21 | 0.35 | 0.27 |
| X020168 | RPS10     | IPI00478810.1 | 439 | 23 | 10 | 13 | 0.27 | 0.26 | 0.24 | 0.33 | 0.25 |
| X020168 | RPS12     | IPI00847579.1 | 360 | 10 | 7  | 8  | 0.24 | 0.26 | 0.26 | 0.26 | 0.27 |
| X020168 | RPS13     | IPI00221089.5 | 359 | 14 | 8  | 9  | 0.19 | 0.18 | 0.17 | 0.21 | 0.17 |
| X020168 | RPS14     | IPI00026271.5 | 276 | 6  | 5  | 5  | 0.28 | 0.28 | 0.29 | 0.30 | 0.30 |
| X020168 | RPS15     | IPI00479058.2 | 81  | 5  | 2  | 3  | 0.26 | 0.25 | 0.23 | 0.26 | 0.25 |
| X020168 | RPS15A    | IPI00221091.9 | 337 | 10 | 8  | 9  | 0.11 | 0.11 | 0.11 | 0.14 | 0.10 |
| X020168 | RPS17     | IPI00791157.1 | 213 | 9  | 5  | 5  | 0.23 | 0.24 | 0.24 | 0.26 | 0.23 |
| X020168 | RPS19     | IPI00215780.5 | 456 | 15 | 10 | 13 | 0.23 | 0.22 | 0.23 | 0.26 | 0.24 |
| X020168 | RPS20     | IPI00794659.1 | 216 | 8  | 3  | 5  | 0.29 | 0.29 | 0.29 | 0.34 | 0.32 |
| X020168 | RPS21     | IPI00387084.1 | 330 | 12 | 5  | 6  | 0.23 | 0.29 | 0.23 | 0.29 | 0.23 |
| X020168 | RPS25     | IPI00012750.3 | 141 | 4  | 2  | 2  | 0.13 | 0.12 | 0.13 | 0.13 | 0.09 |
| X020168 | RPS3A     | IPI00472119.2 | 752 | 25 | 16 | 18 | 0.23 | 0.25 | 0.21 | 0.24 | 0.21 |
| X020168 | RPS5      | IPI00008433.4 | 400 | 12 | 7  | 8  | 0.29 | 0.29 | 0.29 | 0.33 | 0.31 |
| X020168 | RPS7      | IPI00013415.1 | 343 | 10 | 8  | 10 | 0.15 | 0.17 | 0.17 | 0.18 | 0.15 |
| X020168 | RPSA      | IPI00413108.4 | 705 | 16 | 9  | 11 | 0.31 | 0.32 | 0.31 | 0.34 | 0.32 |
| X020168 | RTCD1     | IPI00221327.1 | 144 | 4  | 3  | 3  | 0.23 | 0.28 | 0.24 | 0.26 | 0.22 |
| X020168 | RTN3      | IPI00743293.2 | 113 | 3  | 2  | 2  | 0.25 | 0.28 | 0.24 | 0.32 | 0.24 |
| X020168 | RUVBL2    | IPI00009104.7 | 732 | 18 | 14 | 14 | 0.29 | 0.29 | 0.28 | 0.35 | 0.31 |
| X020168 | S100P     | IPI00017526.1 | 145 | 3  | 2  | 2  | 0.27 | 0.29 | 0.25 | 0.28 | 0.26 |
| X020168 | SACM1L    | IPI00022275.6 | 82  | 2  | 2  | 2  | 0.15 | 0.12 | 0.12 | 0.21 | 0.15 |
| X020168 | SAE1      | IPI00033130.3 | 220 | 6  | 2  | 2  | 0.12 | 0.22 | 0.13 | 0.21 | 0.14 |
| X020168 | SAMSN1    | IPI00339277.1 | 49  | 2  | 2  | 2  | 0.28 | 0.32 | 0.36 | 0.37 | 0.34 |
| X020168 | SAR1A     | IPI00015954.1 | 111 | 3  | 2  | 2  | 0.12 | 0.14 | 0.11 | 0.18 | 0.11 |
| X020168 | SARS      | IPI00514587.1 | 208 | 8  | 6  | 6  | 0.20 | 0.21 | 0.17 | 0.25 | 0.21 |
| X020168 | SBDS      | IPI00427330.3 | 273 | 7  | 6  | 6  | 0.30 | 0.29 | 0.27 | 0.34 | 0.31 |
| X020168 | SCYE1     | IPI00793201.1 | 205 | 6  | 2  | 2  | 0.32 | 0.34 | 0.33 | 0.35 | 0.37 |
| X020168 | SDF2L1    | IPI00106642.4 | 199 | 6  | 3  | 3  | 0.21 | 0.23 | 0.20 | 0.25 | 0.20 |
| X020168 | SEC11A    | IPI00790799.1 | 58  | 3  | 3  | 3  | 0.15 | 0.14 | 0.10 | 0.17 | 0.14 |
| X020168 | SEC22B    | IPI00006865.3 | 296 | 8  | 5  | 5  | 0.26 | 0.26 | 0.21 | 0.31 | 0.25 |
| X020168 | SEC61B    | IPI00220835.7 | 130 | 4  | 2  | 3  | 0.27 | 0.23 | 0.22 | 0.27 | 0.23 |
| X020168 | SERBP1    | IPI00410693.3 | 610 | 13 | 12 | 12 | 0.23 | 0.21 | 0.26 | 0.24 | 0.25 |
| X020168 | SERPINH   | IPI00032140.4 | 324 | 8  | 6  | 7  | 0.24 | 0.25 | 0.23 | 0.34 | 0.25 |
| X020168 | SET       | IPI00072377.1 | 391 | 8  | 6  | 6  | 0.24 | 0.18 | 0.15 | 0.22 | 0.19 |

|         |          |               |     |    |    |    |      |      |      |      |      |
|---------|----------|---------------|-----|----|----|----|------|------|------|------|------|
| X020168 | SFRS1    | IPI00218591.2 | 559 | 16 | 9  | 9  | 0.25 | 0.29 | 0.27 | 0.32 | 0.29 |
| X020168 | SFRS10   | IPI00555647.3 | 232 | 6  | 4  | 4  | 0.09 | 0.14 | 0.10 | 0.14 | 0.11 |
| X020168 | SFRS3    | IPI00010204.1 | 203 | 10 | 6  | 6  | 0.24 | 0.25 | 0.28 | 0.29 | 0.27 |
| X020168 | SFRS5    | IPI00915825.1 | 133 | 4  | 3  | 3  | 0.35 | 0.36 | 0.40 | 0.44 | 0.44 |
| X020168 | SFRS9    | IPI00012340.1 | 225 | 7  | 4  | 4  | 0.17 | 0.15 | 0.16 | 0.22 | 0.16 |
| X020168 | SFXN1    | IPI00009368.4 | 87  | 4  | 3  | 3  | 0.21 | 0.19 | 0.22 | 0.27 | 0.17 |
| X020168 | SHMT2    | IPI00789370.1 | 725 | 21 | 15 | 16 | 0.20 | 0.21 | 0.19 | 0.28 | 0.20 |
| X020168 | SLC16A1  | IPI00024650.1 | 109 | 4  | 3  | 3  | 0.28 | 0.24 | 0.29 | 0.33 | 0.29 |
| X020168 | SLC1A5   | IPI00019472.4 | 292 | 6  | 6  | 6  | 0.17 | 0.15 | 0.13 | 0.19 | 0.14 |
| X020168 | SLC25A1  | IPI00294159.3 | 248 | 6  | 5  | 5  | 0.16 | 0.17 | 0.14 | 0.20 | 0.16 |
| X020168 | SLC25A11 | IPI00219729.3 | 91  | 4  | 2  | 2  | 0.22 | 0.23 | 0.20 | 0.28 | 0.19 |
| X020168 | SLC25A21 | IPI00012690.1 | 94  | 2  | 2  | 2  | 0.19 | 0.17 | 0.13 | 0.21 | 0.15 |
| X020168 | SLC25A24 | IPI00337494.7 | 120 | 4  | 3  | 3  | 0.28 | 0.30 | 0.23 | 0.34 | 0.25 |
| X020168 | SLC25A3  | IPI00022202.3 | 436 | 15 | 10 | 11 | 0.21 | 0.25 | 0.23 | 0.27 | 0.24 |
| X020168 | SLC25A6  | IPI00291467.7 | 171 | 3  | 2  | 2  | 0.32 | 0.29 | 0.30 | 0.34 | 0.33 |
| X020168 | SLC39A7  | IPI00021888.5 | 57  | 2  | 2  | 2  | 0.19 | 0.24 | 0.22 | 0.26 | 0.20 |
| X020168 | SLC4A1   | IPI00791534.1 | 105 | 4  | 3  | 3  | 0.22 | 0.14 | 0.20 | 0.40 | 0.38 |
| X020168 | SLC7A5   | IPI00008986.1 | 224 | 4  | 2  | 2  | 0.28 | 0.31 | 0.29 | 0.39 | 0.35 |
| X020168 | SNAP29   | IPI00032831.4 | 80  | 3  | 2  | 2  | 0.14 | 0.15 | 0.11 | 0.21 | 0.16 |
| X020168 | SND1     | IPI00140420.4 | 888 | 19 | 14 | 16 | 0.16 | 0.17 | 0.13 | 0.25 | 0.17 |
| X020168 | SNRPD3   | IPI00879750.1 | 171 | 8  | 4  | 5  | 0.28 | 0.29 | 0.31 | 0.31 | 0.28 |
| X020168 | SNRPF    | IPI00220528.6 | 216 | 8  | 3  | 5  | 0.23 | 0.23 | 0.23 | 0.26 | 0.21 |
| X020168 | SPCS2    | IPI00472939.2 | 130 | 4  | 3  | 3  | 0.22 | 0.22 | 0.17 | 0.29 | 0.20 |
| X020168 | SPCS3    | IPI00300299.6 | 141 | 4  | 2  | 2  | 0.14 | 0.18 | 0.11 | 0.23 | 0.15 |
| X020168 | SPN      | IPI00027430.1 | 67  | 2  | 2  | 2  | 0.29 | 0.22 | 0.21 | 0.33 | 0.23 |
| X020168 | SPTA1    | IPI00220741.6 | 104 | 3  | 2  | 2  | 0.39 | 0.35 | 0.34 | 0.45 | 0.46 |
| X020168 | SPTB     | IPI00914949.1 | 118 | 5  | 2  | 2  | 0.15 | 0.15 | 0.11 | 0.24 | 0.18 |
| X020168 | SRP14    | IPI00293434.2 | 319 | 8  | 7  | 7  | 0.31 | 0.30 | 0.30 | 0.30 | 0.29 |
| X020168 | SRP19    | IPI00295889.2 | 158 | 3  | 2  | 2  | 0.25 | 0.22 | 0.24 | 0.29 | 0.29 |
| X020168 | SSBP1    | IPI00029744.1 | 320 | 6  | 6  | 6  | 0.12 | 0.12 | 0.11 | 0.17 | 0.13 |
| X020168 | ST13     | IPI00032826.1 | 240 | 5  | 3  | 3  | 0.31 | 0.27 | 0.29 | 0.36 | 0.33 |
| X020168 | STAU1    | IPI00000001.2 | 140 | 3  | 3  | 3  | 0.26 | 0.27 | 0.26 | 0.36 | 0.29 |
| X020168 | STMN1    | IPI00479997.4 | 259 | 8  | 5  | 5  | 0.18 | 0.19 | 0.18 | 0.29 | 0.22 |
| X020168 | STT3A    | IPI00297492.2 | 336 | 14 | 5  | 5  | 0.35 | 0.39 | 0.30 | 0.45 | 0.41 |
| X020168 | TAGLN2   | IPI00647915.1 | 414 | 12 | 8  | 10 | 0.22 | 0.24 | 0.18 | 0.27 | 0.22 |
| X020168 | TALDO1   | IPI00744692.1 | 547 | 16 | 10 | 10 | 0.10 | 0.14 | 0.08 | 0.13 | 0.09 |
| X020168 | TARDBP   | IPI00025815.2 | 319 | 6  | 4  | 4  | 0.16 | 0.19 | 0.13 | 0.23 | 0.19 |
| X020168 | TBL2     | IPI00000948.3 | 186 | 7  | 2  | 2  | 0.28 | 0.32 | 0.33 | 0.36 | 0.33 |
| X020168 | TFB1M    | IPI00291525.1 | 116 | 4  | 2  | 2  | 0.28 | 0.21 | 0.23 | 0.32 | 0.25 |
| X020168 | TFRC     | IPI00022462.2 | 449 | 12 | 7  | 7  | 0.27 | 0.30 | 0.25 | 0.32 | 0.29 |

|         |         |               |     |    |    |    |      |      |      |      |      |
|---------|---------|---------------|-----|----|----|----|------|------|------|------|------|
| X020168 | THOC4   | IPI00328840.9 | 314 | 6  | 3  | 3  | 0.26 | 0.22 | 0.26 | 0.23 | 0.27 |
| X020168 | THOC6   | IPI00328985.1 | 126 | 3  | 2  | 2  | 0.31 | 0.33 | 0.36 | 0.34 | 0.38 |
| X020168 | THYN1   | IPI00383163.5 | 152 | 6  | 5  | 5  | 0.26 | 0.25 | 0.24 | 0.26 | 0.22 |
| X020168 | TIMM44  | IPI00306516.1 | 405 | 10 | 5  | 6  | 0.31 | 0.28 | 0.26 | 0.36 | 0.30 |
| X020168 | TIMM8A  | IPI00028376.1 | 127 | 3  | 3  | 3  | 0.17 | 0.25 | 0.17 | 0.19 | 0.18 |
| X020168 | TMED10  | IPI00028055.4 | 178 | 5  | 3  | 4  | 0.15 | 0.19 | 0.11 | 0.22 | 0.15 |
| X020168 | TMED2   | IPI00016608.1 | 176 | 9  | 3  | 5  | 0.11 | 0.14 | 0.09 | 0.13 | 0.10 |
| X020168 | TMEM33  | IPI00299084.1 | 270 | 9  | 5  | 6  | 0.34 | 0.31 | 0.30 | 0.37 | 0.37 |
| X020168 | TOMM20  | IPI00016676.1 | 68  | 2  | 2  | 2  | 0.14 | 0.14 | 0.13 | 0.18 | 0.14 |
| X020168 | TOMM70A | IPI00015602.1 | 155 | 6  | 4  | 4  | 0.24 | 0.25 | 0.24 | 0.33 | 0.27 |
| X020168 | TPM4    | IPI00010779.4 | 162 | 6  | 2  | 2  | 0.24 | 0.28 | 0.26 | 0.35 | 0.23 |
| X020168 | TRAP1   | IPI00030275.5 | 513 | 15 | 8  | 9  | 0.20 | 0.19 | 0.18 | 0.33 | 0.23 |
| X020168 | TRAPPC3 | IPI00004324.1 | 99  | 3  | 2  | 2  | 0.14 | 0.18 | 0.13 | 0.23 | 0.14 |
| X020168 | TSG101  | IPI00018434.1 | 114 | 4  | 2  | 2  | 0.26 | 0.33 | 0.29 | 0.31 | 0.37 |
| X020168 | TSN     | IPI00018768.1 | 197 | 4  | 4  | 4  | 0.27 | 0.30 | 0.26 | 0.31 | 0.29 |
| X020168 | TUFM    | IPI00027107.5 | 913 | 21 | 15 | 17 | 0.16 | 0.16 | 0.14 | 0.23 | 0.16 |
| X020168 | UBA2    | IPI00023234.3 | 252 | 7  | 4  | 4  | 0.19 | 0.23 | 0.19 | 0.26 | 0.19 |
| X020168 | UBE2I   | IPI00450472.3 | 115 | 3  | 3  | 3  | 0.15 | 0.15 | 0.13 | 0.19 | 0.14 |
| X020168 | UBE2K   | IPI00021370.1 | 112 | 4  | 2  | 2  | 0.22 | 0.24 | 0.17 | 0.25 | 0.17 |
| X020168 | UBE2M   | IPI00022597.1 | 150 | 4  | 4  | 4  | 0.20 | 0.18 | 0.17 | 0.24 | 0.17 |
| X020168 | UBE2N   | IPI00003949.1 | 204 | 5  | 3  | 3  | 0.16 | 0.20 | 0.15 | 0.21 | 0.15 |
| X020168 | UQCRB   | IPI00220416.3 | 138 | 3  | 2  | 2  | 0.09 | 0.11 | 0.07 | 0.12 | 0.09 |
| X020168 | UQCRC1  | IPI00013847.4 | 167 | 5  | 3  | 3  | 0.23 | 0.23 | 0.22 | 0.29 | 0.28 |
| X020168 | UQCRH   | IPI00296022.1 | 66  | 2  | 2  | 2  | 0.23 | 0.23 | 0.19 | 0.29 | 0.23 |
| X020168 | UQCRQ   | IPI00024742.7 | 60  | 2  | 2  | 2  | 0.20 | 0.15 | 0.18 | 0.25 | 0.17 |
| X020168 | USP10   | IPI00291946.8 | 143 | 3  | 2  | 2  | 0.30 | 0.24 | 0.28 | 0.32 | 0.25 |
| X020168 | USP14   | IPI00872664.1 | 269 | 10 | 3  | 3  | 0.22 | 0.28 | 0.20 | 0.30 | 0.22 |
| X020168 | VAMP7   | IPI00013236.3 | 49  | 2  | 2  | 2  | 0.32 | 0.27 | 0.25 | 0.34 | 0.27 |
| X020168 | VAPA    | IPI00374657.2 | 298 | 12 | 7  | 7  | 0.10 | 0.11 | 0.10 | 0.16 | 0.12 |
| X020168 | VAPB    | IPI00006211.4 | 142 | 4  | 4  | 4  | 0.21 | 0.22 | 0.19 | 0.25 | 0.20 |
| X020168 | VASP    | IPI00902584.1 | 280 | 6  | 5  | 5  | 0.25 | 0.22 | 0.20 | 0.31 | 0.22 |
| X020168 | VAT1    | IPI00156689.3 | 76  | 2  | 2  | 2  | 0.13 | 0.15 | 0.10 | 0.17 | 0.11 |
| X020168 | VBP1    | IPI00334159.6 | 248 | 6  | 5  | 5  | 0.25 | 0.32 | 0.26 | 0.32 | 0.28 |
| X020168 | VIM     | IPI00418471.6 | 993 | 23 | 19 | 21 | 0.22 | 0.24 | 0.19 | 0.30 | 0.21 |
| X020168 | VPS26A  | IPI00411426.3 | 94  | 6  | 2  | 2  | 0.30 | 0.35 | 0.28 | 0.37 | 0.32 |
| X020168 | VTN     | IPI00298971.1 | 95  | 3  | 2  | 2  | 0.28 | 0.30 | 0.27 | 0.31 | 0.29 |
| X020168 | WARS    | IPI00295400.1 | 461 | 10 | 8  | 8  | 0.11 | 0.13 | 0.11 | 0.19 | 0.13 |
| X020168 | XRCC6   | IPI00644712.4 | 601 | 19 | 11 | 13 | 0.33 | 0.32 | 0.31 | 0.40 | 0.46 |
| X020168 | YARS    | IPI00007074.5 | 834 | 23 | 18 | 18 | 0.30 | 0.30 | 0.26 | 0.38 | 0.30 |
| X020168 | YWHAB   | IPI00216318.5 | 122 | 4  | 2  | 2  | 0.24 | 0.29 | 0.21 | 0.31 | 0.23 |



|         |          |               |      |     |    |     |      |      |      |      |      |
|---------|----------|---------------|------|-----|----|-----|------|------|------|------|------|
| X020168 | YWHAE    | IPI00000816.1 | 648  | 19  | 10 | 12  | 0.17 | 0.27 | 0.16 | 0.24 | 0.17 |
| X020168 | YWHAG    | IPI00220642.7 | 295  | 10  | 3  | 3   | 0.13 | 0.15 | 0.09 | 0.21 | 0.11 |
| X020168 | YWHAQ    | IPI00018146.1 | 185  | 3   | 3  | 3   | 0.21 | 0.26 | 0.19 | 0.28 | 0.22 |
| X020168 | PRPF38B  | IPI00018098.4 | 524  | 14  | 11 | 12  | 0.42 | 0.51 | 0.78 | 0.64 | 0.84 |
| X020168 | NQO2     | IPI00219129.9 | 488  | 10  | 7  | 9   | 0.49 | 0.63 | 0.75 | 0.84 | 0.73 |
| X020168 | A2M      | IPI00478003.1 | 1955 | 47  | 22 | 24  | 1.02 | 0.94 | 0.95 | 0.96 | 1.03 |
| X020168 | ACAA2    | IPI00873829.1 | 418  | 12  | 10 | 10  | 0.81 | 0.79 | 0.81 | 0.79 | 0.82 |
| X020168 | ACAD8    | IPI00747159.1 | 388  | 10  | 8  | 8   | 0.74 | 0.74 | 0.73 | 0.77 | 0.73 |
| X020168 | AGL      | IPI00328318.7 | 1012 | 32  | 24 | 25  | 0.82 | 0.77 | 0.75 | 0.82 | 0.77 |
| X020168 | AHNAK    | IPI00021812.2 | 350  | 14  | 4  | 4   | 0.84 | 0.85 | 0.83 | 0.85 | 0.93 |
| X020168 | ALDH7A1  | IPI00221234.7 | 406  | 8   | 4  | 4   | 0.77 | 0.84 | 0.70 | 0.74 | 0.76 |
| X020168 | ARG1     | IPI00398768.1 | 318  | 10  | 6  | 7   | 0.81 | 1.99 | 0.70 | 0.67 | 1.24 |
| X020168 | BOLA2    | IPI00301434.4 | 243  | 7   | 4  | 4   | 0.80 | 0.83 | 0.87 | 0.91 | 0.85 |
| X020168 | C12ORF10 | IPI00029444.1 | 860  | 23  | 14 | 19  | 0.72 | 0.73 | 0.71 | 0.72 | 0.68 |
| X020168 | C4B      | IPI00418163.3 | 183  | 8   | 3  | 3   | 0.73 | 0.74 | 0.68 | 0.74 | 0.72 |
| X020168 | CAD      | IPI00301263.2 | 6463 | 210 | 96 | 144 | 1.03 | 0.98 | 1.01 | 0.98 | 1.00 |
| X020168 | CALD1    | IPI00014516.1 | 193  | 6   | 3  | 3   | 0.84 | 0.66 | 0.70 | 0.75 | 0.83 |
| X020168 | CAPZA2   | IPI00026182.5 | 331  | 5   | 4  | 4   | 0.74 | 0.81 | 0.66 | 0.80 | 0.75 |
| X020168 | CASP14   | IPI00013885.1 | 541  | 15  | 10 | 11  | 0.97 | 2.16 | 0.68 | 0.99 | 1.23 |
| X020168 | CD5L     | IPI00025204.1 | 46   | 4   | 2  | 2   | 1.09 | 0.91 | 0.84 | 0.93 | 0.85 |
| X020168 | CKAP4    | IPI00141318.2 | 363  | 7   | 5  | 5   | 0.71 | 0.80 | 0.89 | 0.69 | 0.87 |
| X020168 | CPSF6    | IPI00030654.1 | 586  | 18  | 9  | 12  | 0.71 | 0.82 | 0.85 | 0.67 | 0.66 |
| X020168 | CRKL     | IPI00004839.1 | 825  | 24  | 15 | 20  | 0.77 | 0.80 | 0.77 | 0.83 | 0.80 |
| X020168 | CSH1     | IPI00025785.2 | 404  | 12  | 6  | 9   | 0.83 | 0.84 | 0.81 | 0.87 | 0.82 |
| X020168 | CSRP2    | IPI00002824.7 | 247  | 11  | 6  | 6   | 0.81 | 0.85 | 0.73 | 0.87 | 0.84 |
| X020168 | CSTB     | IPI00021828.1 | 251  | 8   | 3  | 3   | 0.97 | 0.87 | 0.88 | 0.98 | 0.93 |
| X020168 | CTPS     | IPI00290142.5 | 627  | 15  | 8  | 8   | 0.73 | 0.75 | 0.73 | 0.83 | 0.75 |
| X020168 | CYP19A1  | IPI00879236.1 | 318  | 10  | 4  | 4   | 0.92 | 0.91 | 0.85 | 0.97 | 0.82 |
| X020168 | DCD      | IPI00847793.1 | 295  | 8   | 6  | 7   | 1.58 | 1.79 | 1.28 | 1.42 | 1.03 |
| X020168 | DCK      | IPI00020454.1 | 910  | 33  | 14 | 22  | 1.05 | 1.06 | 0.89 | 1.00 | 0.90 |
| X020168 | DGUOK    | IPI00004461.2 | 113  | 5   | 4  | 4   | 0.72 | 0.76 | 0.73 | 0.82 | 0.76 |
| X020168 | DHFR     | IPI00887771.1 | 1046 | 72  | 13 | 37  | 1.07 | 1.07 | 1.16 | 1.14 | 1.18 |
| X020168 | DNAJC10  | IPI00293260.5 | 908  | 23  | 17 | 19  | 0.98 | 0.99 | 0.95 | 1.01 | 0.96 |
| X020168 | DNPEP    | IPI00015856.4 | 512  | 13  | 7  | 7   | 0.69 | 0.70 | 0.70 | 0.71 | 0.66 |
| X020168 | DSC1     | IPI00386975.2 | 379  | 7   | 5  | 5   | 0.92 | 0.85 | 0.67 | 0.75 | 0.93 |
| X020168 | DSG1     | IPI00025753.1 | 783  | 18  | 14 | 16  | 1.01 | 1.11 | 0.73 | 0.86 | 0.81 |
| X020168 | FABP5    | IPI00007797.3 | 395  | 12  | 7  | 8   | 0.74 | 4.65 | 0.80 | 0.71 | 0.68 |
| X020168 | FASN     | IPI00026781.2 | 2589 | 64  | 46 | 48  | 0.75 | 0.78 | 0.71 | 0.76 | 0.76 |
| X020168 | FBLN1    | IPI00889740.1 | 317  | 7   | 3  | 3   | 1.12 | 1.16 | 1.13 | 1.35 | 1.09 |
| X020168 | FLG      | IPI00026256.2 | 170  | 4   | 4  | 4   | 1.39 | 3.32 | 0.91 | 0.90 | 0.93 |

|         |          |                |      |     |    |     |      |      |      |      |      |
|---------|----------|----------------|------|-----|----|-----|------|------|------|------|------|
| X020168 | FLG2     | IPI00397801.4  | 319  | 9   | 8  | 9   | 1.09 | 1.86 | 0.79 | 1.01 | 1.04 |
| X020168 | FLJ11151 | IPI00305010.3  | 275  | 7   | 5  | 5   | 0.69 | 0.79 | 0.65 | 0.78 | 0.74 |
| X020168 | FLJ12529 | IPI00915356.1  | 499  | 12  | 11 | 11  | 0.68 | 0.82 | 0.87 | 0.66 | 0.66 |
| X020168 | FN3KRP   | IPI00099986.5  | 266  | 12  | 6  | 8   | 0.72 | 0.75 | 0.73 | 0.80 | 0.71 |
| X020168 | GART     | IPI00025273.1  | 3792 | 162 | 51 | 110 | 1.08 | 1.11 | 1.06 | 0.95 | 1.02 |
| X020168 | GCDH     | IPI00024317.1  | 506  | 16  | 9  | 11  | 0.74 | 0.73 | 0.73 | 0.75 | 0.73 |
| X020168 | GGCT     | IPI00031564.1  | 288  | 5   | 5  | 5   | 0.85 | 1.24 | 0.78 | 0.89 | 0.91 |
| X020168 | GLOD4    | IPI00007102.3  | 311  | 11  | 6  | 6   | 0.73 | 0.70 | 0.68 | 0.78 | 0.68 |
| X020168 | GLUL     | IPI00010130.3  | 672  | 19  | 15 | 16  | 0.86 | 0.93 | 0.86 | 0.82 | 0.84 |
| X020168 | GSDMA    | IPI00166200.4  | 165  | 5   | 4  | 4   | 1.86 | 1.57 | 0.79 | 1.38 | 1.06 |
| X020168 | GSR      | IPI00016862.1  | 491  | 12  | 7  | 7   | 0.71 | 0.72 | 0.71 | 0.75 | 0.78 |
| X020168 | GSTM3    | IPI00246975.8  | 156  | 5   | 3  | 3   | 0.76 | 0.84 | 0.83 | 0.79 | 0.71 |
| X020168 | HDAC6    | IPI00005711.4  | 406  | 9   | 7  | 7   | 0.76 | 0.69 | 0.67 | 0.77 | 0.75 |
| X020168 | HSD11B2  | IPI00300050.3  | 207  | 5   | 4  | 4   | 0.72 | 0.68 | 0.77 | 0.74 | 0.81 |
| X020168 | HSD17B4  | IPI00909582.1  | 2404 | 75  | 39 | 62  | 1.10 | 1.02 | 0.97 | 1.07 | 1.02 |
| X020168 | HSD3B1   | IPI00246994.6  | 174  | 6   | 3  | 3   | 0.86 | 0.91 | 0.89 | 0.94 | 0.96 |
| X020168 | HTATSF1  | IPI00013788.1  | 276  | 14  | 3  | 3   | 0.78 | 0.82 | 0.86 | 0.75 | 0.82 |
| X020168 | IGJ      | IPI00178926.2  | 62   | 2   | 2  | 2   | 0.72 | 0.81 | 0.71 | 1.05 | 0.69 |
| X020168 | IMPDH1   | IPI00375527.4  | 1159 | 34  | 16 | 22  | 0.79 | 1.00 | 1.02 | 1.01 | 1.00 |
| X020168 | IMPDH2   | IPI00291510.3  | 2328 | 104 | 30 | 75  | 0.89 | 1.01 | 1.11 | 1.10 | 1.16 |
| X020168 | INPP5K   | IPI00374574.2  | 118  | 4   | 2  | 2   | 0.94 | 1.01 | 0.99 | 0.98 | 0.95 |
| X020168 | IQGAP2   | IPI00299048.6  | 284  | 11  | 4  | 4   | 0.79 | 0.68 | 0.70 | 0.88 | 0.90 |
| X020168 | KIAA0664 | IPI00024425.5  | 455  | 13  | 7  | 7   | 0.85 | 0.79 | 0.75 | 0.87 | 0.71 |
| X020168 | KLHL23   | IPI00062213.4  | 76   | 2   | 2  | 2   | 0.89 | 0.82 | 0.73 | 0.80 | 0.79 |
| X020168 | KNG1     | IPI00032328.2  | 257  | 7   | 3  | 3   | 0.87 | 0.87 | 0.77 | 1.03 | 0.84 |
| X020168 | LGALS3BF | IPI00023673.1  | 489  | 12  | 9  | 10  | 0.72 | 0.74 | 0.72 | 0.77 | 0.71 |
| X020168 | LOC28488 | IPI00293276.10 | 138  | 9   | 3  | 4   | 0.91 | 0.80 | 0.72 | 0.89 | 0.71 |
| X020168 | LPCAT1   | IPI00171626.3  | 68   | 2   | 2  | 2   | 0.84 | 0.83 | 0.69 | 0.76 | 0.66 |
| X020168 | MCCC1    | IPI00024580.4  | 312  | 9   | 4  | 4   | 0.81 | 0.80 | 0.73 | 0.86 | 0.74 |
| X020168 | MKRN1    | IPI00033350.3  | 100  | 2   | 2  | 2   | 0.86 | 0.96 | 0.85 | 0.83 | 0.84 |
| X020168 | MKRN2    | IPI00396406.6  | 738  | 27  | 18 | 21  | 0.77 | 0.78 | 0.76 | 0.81 | 0.79 |
| X020168 | MSRB3    | IPI00479793.2  | 92   | 4   | 3  | 3   | 0.83 | 0.75 | 0.83 | 0.85 | 0.86 |
| X020168 | NCKAP1   | IPI00409684.2  | 265  | 6   | 3  | 3   | 0.66 | 0.68 | 0.70 | 0.78 | 0.73 |
| X020168 | NUDT1    | IPI00004392.2  | 408  | 9   | 6  | 7   | 0.95 | 1.03 | 1.03 | 0.98 | 0.93 |
| X020168 | NUP155   | IPI00026625.1  | 1381 | 30  | 23 | 23  | 0.82 | 0.80 | 0.78 | 0.85 | 0.83 |
| X020168 | OLFM4    | IPI00022255.1  | 382  | 9   | 5  | 5   | 0.79 | 0.84 | 0.78 | 0.82 | 0.79 |
| X020168 | OPA1     | IPI00107753.2  | 956  | 22  | 15 | 15  | 0.76 | 0.79 | 0.81 | 0.84 | 0.84 |
| X020168 | P11      | IPI00795429.1  | 1008 | 54  | 18 | 32  | 1.04 | 1.04 | 1.04 | 1.02 | 0.98 |
| X020168 | PARS2    | IPI00553006.1  | 275  | 8   | 3  | 3   | 0.73 | 0.77 | 0.69 | 0.72 | 0.69 |
| X020168 | PC       | IPI00299402.1  | 2563 | 68  | 47 | 54  | 0.97 | 0.92 | 0.97 | 0.93 | 0.93 |

|         |          |               |      |    |    |    |      |       |      |      |      |
|---------|----------|---------------|------|----|----|----|------|-------|------|------|------|
| X020168 | PCBD1    | IPI00218568.7 | 559  | 27 | 8  | 14 | 0.95 | 0.93  | 0.92 | 0.90 | 0.88 |
| X020168 | PCBD2    | IPI00329646.4 | 394  | 10 | 6  | 8  | 0.99 | 0.97  | 0.98 | 0.98 | 0.95 |
| X020168 | PCCA     | IPI00796978.3 | 3110 | 96 | 49 | 74 | 0.99 | 1.00  | 1.02 | 0.97 | 0.97 |
| X020168 | PCCB     | IPI00007247.4 | 1602 | 47 | 25 | 36 | 0.98 | 0.96  | 0.97 | 0.88 | 0.83 |
| X020168 | PDE10A   | IPI00215786.3 | 1185 | 28 | 21 | 22 | 0.69 | 0.66  | 0.69 | 0.67 | 0.68 |
| X020168 | PDXK     | IPI00013004.1 | 526  | 13 | 9  | 10 | 0.82 | 0.90  | 0.85 | 0.88 | 0.82 |
| X020168 | PFN2     | IPI00219468.4 | 285  | 5  | 2  | 2  | 0.88 | 0.82  | 0.89 | 0.90 | 0.91 |
| X020168 | PI4K2B   | IPI00291068.3 | 281  | 8  | 6  | 6  | 0.83 | 0.70  | 0.72 | 0.77 | 0.65 |
| X020168 | PLG      | IPI00019580.1 | 1309 | 36 | 25 | 27 | 0.84 | 0.87  | 0.83 | 0.80 | 0.85 |
| X020168 | PPIL4    | IPI00642862.1 | 545  | 12 | 10 | 10 | 0.72 | 0.86  | 0.86 | 0.72 | 0.70 |
| X020168 | PPP4C    | IPI00012833.1 | 168  | 5  | 4  | 4  | 0.77 | 0.90  | 0.70 | 0.71 | 0.81 |
| X020168 | PRKDC    | IPI00296337.2 | 3342 | 96 | 66 | 68 | 0.70 | 0.66  | 0.67 | 0.72 | 0.69 |
| X020168 | PROSC    | IPI00016346.1 | 255  | 8  | 6  | 6  | 0.81 | 0.79  | 0.75 | 0.83 | 0.76 |
| X020168 | PSG3     | IPI00002903.3 | 81   | 2  | 2  | 2  | 0.74 | 0.86  | 0.75 | 0.80 | 0.76 |
| X020168 | PSME1    | IPI00748256.2 | 543  | 13 | 10 | 10 | 0.65 | 0.67  | 0.68 | 0.67 | 0.67 |
| X020168 | PTER     | IPI00100933.1 | 457  | 11 | 9  | 9  | 0.79 | 0.79  | 0.74 | 0.78 | 0.79 |
| X020168 | PUF60    | IPI00069750.2 | 1300 | 36 | 22 | 30 | 0.85 | 0.92  | 1.00 | 0.80 | 0.74 |
| X020168 | PZP      | IPI00025426.2 | 180  | 6  | 5  | 5  | 0.80 | 0.80  | 0.79 | 0.81 | 0.87 |
| X020168 | Q9UL88_H | IPI00783024.1 | 164  | 2  | 2  | 2  | 1.11 | 1.19  | 1.26 | 1.05 | 1.11 |
| X020168 | RABGGTB  | IPI00295849.3 | 198  | 5  | 2  | 2  | 0.76 | 0.79  | 0.72 | 0.83 | 0.75 |
| X020168 | S100A14  | IPI00010214.1 | 85   | 2  | 2  | 2  | 1.07 | 1.97  | 0.67 | 0.85 | 0.87 |
| X020168 | S100A7   | IPI00219806.7 | 233  | 10 | 3  | 6  | 1.23 | 21.55 | 0.50 | 0.53 | 0.92 |
| X020168 | S100A8   | IPI00007047.1 | 260  | 10 | 8  | 10 | 0.71 | 12.57 | 0.49 | 0.58 | 0.55 |
| X020168 | SEC16A   | IPI00641384.2 | 271  | 10 | 6  | 6  | 0.73 | 0.77  | 0.66 | 0.76 | 0.69 |
| X020168 | SEC23A   | IPI00017375.2 | 371  | 10 | 7  | 7  | 0.68 | 0.67  | 0.66 | 0.71 | 0.65 |
| X020168 | SEC24C   | IPI00024661.4 | 794  | 18 | 14 | 14 | 0.74 | 0.70  | 0.69 | 0.74 | 0.70 |
| X020168 | SERPINB2 | IPI00007117.1 | 378  | 10 | 6  | 7  | 0.80 | 0.78  | 0.75 | 0.88 | 0.78 |
| X020168 | SERPINC1 | IPI00032179.2 | 111  | 4  | 3  | 3  | 0.77 | 0.71  | 0.78 | 0.86 | 0.76 |
| X020168 | SF3B1    | IPI00026089.3 | 1175 | 29 | 20 | 21 | 0.72 | 0.70  | 0.79 | 0.65 | 0.72 |
| X020168 | SKIV2L2  | IPI00647217.2 | 497  | 17 | 11 | 11 | 0.68 | 0.70  | 0.66 | 0.67 | 0.67 |
| X020168 | SMARCC1  | IPI00234252.3 | 348  | 11 | 5  | 5  | 0.67 | 0.74  | 0.74 | 0.72 | 0.72 |
| X020168 | TF       | IPI00022463.1 | 1203 | 24 | 20 | 21 | 0.78 | 0.79  | 0.70 | 0.82 | 0.76 |
| X020168 | TGM3     | IPI00300376.4 | 625  | 15 | 9  | 9  | 1.10 | 1.95  | 0.75 | 1.06 | 0.93 |
| X020168 | TPPP3    | IPI00306413.3 | 147  | 3  | 3  | 3  | 0.88 | 0.88  | 0.78 | 0.83 | 0.85 |
| X020168 | TRIM25   | IPI00029629.3 | 677  | 17 | 12 | 12 | 0.69 | 0.72  | 0.68 | 0.93 | 0.71 |
| X020168 | TRIM59   | IPI00432462.2 | 172  | 7  | 2  | 2  | 0.79 | 0.80  | 0.94 | 0.95 | 0.80 |
| X020168 | TWISTNB  | IPI00005477.3 | 138  | 4  | 2  | 2  | 0.74 | 0.71  | 0.85 | 0.65 | 0.65 |
| X020168 | TXN      | IPI00216298.6 | 287  | 10 | 5  | 7  | 0.85 | 0.93  | 0.81 | 0.98 | 0.87 |
| X020168 | TYMS     | IPI00221108.5 | 273  | 7  | 2  | 2  | 0.93 | 1.04  | 0.91 | 0.91 | 1.06 |
| X020168 | USP24    | IPI00902614.2 | 279  | 10 | 5  | 5  | 0.83 | 0.78  | 0.79 | 0.82 | 0.74 |

|         |         |               |      |    |    |    |      |      |      |      |      |
|---------|---------|---------------|------|----|----|----|------|------|------|------|------|
| X020168 | USP9X   | IPI00221012.7 | 231  | 11 | 4  | 4  | 0.87 | 0.80 | 0.82 | 0.87 | 0.82 |
| X020168 | XTP3TPA | IPI00012197.1 | 437  | 8  | 7  | 7  | 0.73 | 0.76 | 0.76 | 0.78 | 0.80 |
| X020168 | ZC3H11A | IPI00328306.9 | 1978 | 58 | 32 | 35 | 1.00 | 1.00 | 0.95 | 0.94 | 0.95 |
| X020168 | ZC3H14  | IPI00903256.1 | 1370 | 40 | 22 | 23 | 0.89 | 0.91 | 0.90 | 0.88 | 0.90 |
| X020168 | ZC3H4   | IPI00187011.4 | 265  | 7  | 4  | 5  | 0.75 | 0.77 | 0.77 | 0.68 | 0.82 |
| X020168 | ZC3H8   | IPI00307760.7 | 370  | 12 | 8  | 8  | 1.04 | 1.06 | 1.03 | 1.01 | 1.04 |

| TMT129L | Hill | IC50        | pIC50       |
|---------|------|-------------|-------------|
| 1.00    | 1.00 | $\leq 0.16$ | $\geq 6.81$ |
| 1.00    | 1.00 | $\leq 0.16$ | $\geq 6.81$ |
| 1.00    | 1.00 | $\leq 0.16$ | $\geq 6.81$ |
| 1.00    | 1.00 | $\leq 0.16$ | $\geq 6.81$ |
| 1.00    | 1.00 | $\leq 0.16$ | $\geq 6.81$ |
| 1.00    | 1.00 | $\leq 0.16$ | $\geq 6.81$ |
| 1.00    | 1.00 | $\leq 0.16$ | $\geq 6.81$ |
| 1.00    | 1.00 | $\leq 0.16$ | $\geq 6.81$ |
| 1.00    | 1.00 | $\leq 0.16$ | $\geq 6.81$ |
| 1.00    | 1.00 | $\leq 0.16$ | $\geq 6.81$ |
| 1.00    | 1.00 | $\leq 0.16$ | $\geq 6.81$ |
| 1.00    | 1.00 | $\leq 0.16$ | $\geq 6.81$ |
| 1.00    | 1.00 | $\leq 0.16$ | $\geq 6.81$ |
| 1.00    | 1.00 | $\leq 0.16$ | $\geq 6.81$ |
| 1.00    | 1.00 | $\leq 0.16$ | $\geq 6.81$ |
| 1.00    | 1.00 | $\leq 0.16$ | $\geq 6.81$ |
| 1.00    | 1.00 | $\leq 0.16$ | $\geq 6.81$ |
| 1.00    | 1.00 | $\leq 0.16$ | $\geq 6.81$ |
| 1.00    | 1.00 | $\leq 0.16$ | $\geq 6.81$ |
| 1.00    | 1.00 | $\leq 0.16$ | $\geq 6.81$ |
| 1.00    | 0.52 | $\leq 0.16$ | $\geq 6.81$ |
| 1.00    | 1.00 | $\leq 0.16$ | $\geq 6.81$ |
| 1.00    | 1.00 | $\leq 0.16$ | $\geq 6.81$ |
| 1.00    | 1.00 | $\leq 0.16$ | $\geq 6.81$ |
| 1.00    | 0.53 | $\leq 0.16$ | $\geq 6.81$ |
| 1.00    | 1.00 | $\leq 0.16$ | $\geq 6.81$ |
| 1.00    | 1.00 | $\leq 0.16$ | $\geq 6.81$ |
| 1.00    | 1.00 | $\leq 0.16$ | $\geq 6.81$ |
| 1.00    | 1.00 | $\leq 0.16$ | $\geq 6.81$ |





























|      |      |           |             |
|------|------|-----------|-------------|
| 1.00 | NA   | $\geq 40$ | $\leq 4.40$ |
| 1.00 | 1.00 | $\geq 40$ | $\leq 4.40$ |
| 1.00 | 1.00 | $\geq 40$ | $\leq 4.40$ |
| 1.00 | 1.00 | $\geq 40$ | $\leq 4.40$ |
| 1.00 | 1.00 | $\geq 40$ | $\leq 4.40$ |
| 1.00 | 1.00 | $\geq 40$ | $\leq 4.40$ |
| 1.00 | 1.00 | $\geq 40$ | $\leq 4.40$ |
| 1.00 | 1.00 | $\geq 40$ | $\leq 4.40$ |
| 1.00 | 1.00 | $\geq 40$ | $\leq 4.40$ |
| 1.00 | 1.00 | $\geq 40$ | $\leq 4.40$ |
| 1.00 | 1.00 | $\geq 40$ | $\leq 4.40$ |
| 1.00 | 1.00 | $\geq 40$ | $\leq 4.40$ |
| 1.00 | 1.00 | $\geq 40$ | $\leq 4.40$ |
| 1.00 | 1.00 | $\geq 40$ | $\leq 4.40$ |
| 1.00 | 1.00 | $\geq 40$ | $\leq 4.40$ |
| 1.00 | 1.00 | $\geq 40$ | $\leq 4.40$ |
| 1.00 | 1.00 | $\geq 40$ | $\leq 4.40$ |
| 1.00 | 1.00 | $\geq 40$ | $\leq 4.40$ |
| 1.00 | 1.00 | $\geq 40$ | $\leq 4.40$ |
| 1.00 | 1.00 | $\geq 40$ | $\leq 4.40$ |
| 1.00 | 1.00 | $\geq 40$ | $\leq 4.40$ |
| 1.00 | 1.00 | $\geq 40$ | $\leq 4.40$ |
| 1.00 | 1.00 | $\geq 40$ | $\leq 4.40$ |
| 1.00 | 1.00 | $\geq 40$ | $\leq 4.40$ |
| 1.00 | 1.00 | $\geq 40$ | $\leq 4.40$ |
| 1.00 | 1.00 | $\geq 40$ | $\leq 4.40$ |
| 1.00 | 1.00 | $\geq 40$ | $\leq 4.40$ |
| 1.00 | 1.00 | $\geq 40$ | $\leq 4.40$ |
| 1.00 | 1.00 | $\geq 40$ | $\leq 4.40$ |
| 1.00 | 1.00 | $\geq 40$ | $\leq 4.40$ |
| 1.00 | 1.00 | $\geq 40$ | $\leq 4.40$ |
| 1.00 | 1.00 | $\geq 40$ | $\leq 4.40$ |
| 1.00 | 1.00 | $\geq 40$ | $\leq 4.40$ |
| 1.00 | 1.00 | $\geq 40$ | $\leq 4.40$ |
| 1.00 | 1.00 | $\geq 40$ | $\leq 4.40$ |
| 1.00 | 0.60 | $\geq 40$ | $\leq 4.40$ |
| 1.00 | NA   | $\geq 40$ | $\leq 4.40$ |
| 1.00 | 1.00 | $\geq 40$ | $\leq 4.40$ |

|      |      |           |             |
|------|------|-----------|-------------|
| 1.00 | 1.00 | $\geq 40$ | $\leq 4.40$ |
| 1.00 | 1.00 | $\geq 40$ | $\leq 4.40$ |
| 1.00 | 1.00 | $\geq 40$ | $\leq 4.40$ |
| 1.00 | NA   | $\geq 40$ | $\leq 4.40$ |
| 1.00 | 1.00 | $\geq 40$ | $\leq 4.40$ |
| 1.00 | NA   | $\geq 40$ | $\leq 4.40$ |

**Park et al., Supplementary Table 9**

**Proteins identified with Compound 5-matrix in lysates from HEK293 cells, K562 cells, and placenta tissue. Generated IC50 values for test compound Compound 6**

Abbreviations: SSM; number of spectrum-to-sequence matches, UPM; unique peptide matches, NA; not available

| Experiment ID | Protein Name | IPI accession number | Mascot Score | SSM | UPM | SSM used for quantification | abundance relative to vehicle |         |         |         |         |
|---------------|--------------|----------------------|--------------|-----|-----|-----------------------------|-------------------------------|---------|---------|---------|---------|
|               |              |                      |              |     |     |                             | TMT126                        | TMT127L | TMT127H | TMT128L | TMT128H |
| X020169       | FABP5        | IPI00007797.3        | 222          | 6   | 5   | 5                           | 0.34                          | 0.38    | 0.28    | 0.43    | 0.61    |
| X020169       | PRPF38B      | IPI00018098.4        | 491          | 14  | 12  | 13                          | 0.59                          | 0.72    | 0.81    | 0.87    | 0.81    |
| X020169       | SEPT_2       | IPI00871851.2        | 372          | 10  | 4   | 4                           | 1.08                          | 0.93    | 0.96    | 0.89    | 0.95    |
| X020169       | SEPT_7       | IPI00033025.8        | 93           | 2   | 2   | 2                           | 0.98                          | 0.92    | 0.97    | 0.94    | 0.85    |
| X020169       | SEPT_9       | IPI00784614.1        | 84           | 3   | 2   | 2                           | 0.96                          | 0.95    | 0.93    | 0.79    | 0.76    |
| X020169       | SEPT_15      | IPI00030877.2        | 189          | 3   | 2   | 2                           | 0.97                          | 0.98    | 0.94    | 1.08    | 0.96    |
| X020169       | A2M          | IPI00478003.1        | 1967         | 47  | 21  | 24                          | 0.86                          | 0.93    | 0.96    | 0.97    | 1.11    |
| X020169       | ABCF1        | IPI00873899.1        | 1431         | 36  | 25  | 30                          | 1.09                          | 1.13    | 1.08    | 0.94    | 1.12    |
| X020169       | ABHD14B      | IPI00063827.1        | 72           | 2   | 2   | 2                           | 1.13                          | 0.93    | 1.02    | 1.03    | 0.90    |
| X020169       | ACACA        | IPI00396015.5        | 594          | 19  | 12  | 12                          | 1.04                          | 0.92    | 0.98    | 1.09    | 1.03    |
| X020169       | ACADVL       | IPI00028031.2        | 235          | 7   | 5   | 5                           | 1.33                          | 0.92    | 0.97    | 0.80    | 0.83    |
| X020169       | ACLY         | IPI00394838.3        | 1179         | 27  | 18  | 18                          | 1.03                          | 0.86    | 0.92    | 0.95    | 1.20    |
| X020169       | ACOT9        | IPI00646015.1        | 77           | 2   | 2   | 2                           | 1.12                          | 0.87    | 0.93    | 0.86    | 0.94    |
| X020169       | ACP1         | IPI00219861.3        | 130          | 3   | 2   | 2                           | 1.19                          | 0.90    | 0.79    | 0.81    | 0.83    |
| X020169       | ACTB         | IPI00894498.1        | 995          | 32  | 5   | 7                           | 1.36                          | 0.82    | 0.87    | 0.82    | 1.07    |
| X020169       | ACTC1        | IPI00023006.1        | 114          | 5   | 2   | 3                           | 1.25                          | 0.91    | 0.96    | 0.94    | 1.18    |
| X020169       | ACTL6A       | IPI00003627.1        | 255          | 6   | 6   | 6                           | 1.04                          | 1.23    | 1.05    | 1.06    | 1.04    |
| X020169       | ACTN4        | IPI00013808.1        | 369          | 12  | 9   | 9                           | 0.97                          | 0.74    | 0.74    | 0.75    | 0.76    |
| X020169       | ACTR2        | IPI00470573.1        | 172          | 5   | 2   | 2                           | 0.98                          | 0.86    | 0.81    | 0.86    | 0.89    |
| X020169       | ADSS         | IPI00026833.4        | 227          | 6   | 5   | 5                           | 0.98                          | 1.03    | 0.98    | 0.99    | 0.93    |
| X020169       | AFG3L2       | IPI00001091.4        | 152          | 7   | 3   | 3                           | 1.12                          | 0.94    | 0.94    | 0.87    | 0.95    |
| X020169       | AGK          | IPI00019353.4        | 239          | 7   | 4   | 4                           | 1.07                          | 1.06    | 0.88    | 0.79    | 0.83    |
| X020169       | AGT          | IPI00032220.3        | 126          | 4   | 2   | 2                           | 0.88                          | 1.07    | 1.04    | 1.11    | 1.02    |
| X020169       | AHCY         | IPI00012007.6        | 467          | 10  | 9   | 9                           | 1.10                          | 0.88    | 0.89    | 0.82    | 0.83    |
| X020169       | AHNAK        | IPI00021812.2        | 367          | 17  | 6   | 6                           | 0.91                          | 0.96    | 0.89    | 0.89    | 0.95    |
| X020169       | AHSG         | IPI00022431.1        | 214          | 6   | 5   | 5                           | 1.38                          | 0.97    | 0.88    | 0.96    | 0.92    |
| X020169       | AIFM1        | IPI00000690.1        | 497          | 11  | 7   | 7                           | 1.42                          | 0.92    | 0.87    | 0.83    | 0.77    |

|         |          |               |     |    |    |    |      |      |      |      |      |
|---------|----------|---------------|-----|----|----|----|------|------|------|------|------|
| X020169 | AIP      | IPI00010460.1 | 385 | 8  | 6  | 6  | 0.90 | 1.00 | 0.91 | 0.96 | 0.96 |
| X020169 | AK2      | IPI00215901.1 | 328 | 9  | 8  | 8  | 2.56 | 0.92 | 0.88 | 0.94 | 0.84 |
| X020169 | AKAP8L   | IPI00297455.5 | 223 | 5  | 2  | 2  | 0.89 | 0.96 | 1.04 | 0.95 | 1.05 |
| X020169 | AKR1C1   | IPI00029733.1 | 70  | 5  | 3  | 3  | 1.43 | 0.95 | 0.87 | 1.10 | 0.83 |
| X020169 | ALAD     | IPI00442121.3 | 85  | 2  | 2  | 2  | 0.85 | 0.75 | 0.78 | 0.95 | 0.88 |
| X020169 | ALDH18A1 | IPI00008982.1 | 479 | 13 | 9  | 9  | 1.09 | 0.98 | 1.01 | 1.06 | 1.03 |
| X020169 | ALDH7A1  | IPI00221234.7 | 403 | 8  | 4  | 4  | 0.94 | 1.04 | 1.03 | 0.97 | 1.00 |
| X020169 | ALDH9A1  | IPI00479877.4 | 46  | 3  | 2  | 2  | 1.11 | 0.91 | 0.92 | 0.93 | 0.92 |
| X020169 | ALKBH4   | IPI00033770.5 | 198 | 5  | 4  | 4  | 0.97 | 1.00 | 1.03 | 0.99 | 0.92 |
| X020169 | ALOX12B  | IPI00025278.1 | 101 | 4  | 3  | 3  | 0.67 | 0.74 | 0.76 | 0.75 | 0.78 |
| X020169 | AMBP     | IPI00022426.1 | 284 | 8  | 4  | 4  | 1.11 | 1.61 | 1.27 | 1.43 | 1.25 |
| X020169 | ANKRD11  | IPI00914930.1 | 107 | 6  | 2  | 2  | 0.87 | 1.12 | 0.89 | 1.01 | 1.01 |
| X020169 | ANP32A   | IPI00025849.1 | 112 | 4  | 3  | 3  | 1.25 | 1.02 | 2.31 | 0.84 | 0.96 |
| X020169 | ANP32B   | IPI00007423.1 | 291 | 9  | 3  | 4  | 1.68 | 1.07 | 1.98 | 0.92 | 0.96 |
| X020169 | ANXA1    | IPI00218918.5 | 970 | 25 | 16 | 16 | 1.37 | 1.02 | 0.88 | 0.85 | 0.90 |
| X020169 | ANXA11   | IPI00414320.1 | 80  | 3  | 2  | 2  | 1.34 | 0.78 | 0.85 | 0.84 | 0.87 |
| X020169 | AP2A1    | IPI00304577.3 | 157 | 7  | 4  | 4  | 1.04 | 0.93 | 1.01 | 0.93 | 1.00 |
| X020169 | AP2B1    | IPI00784366.1 | 353 | 9  | 7  | 7  | 1.06 | 1.08 | 1.10 | 0.98 | 1.08 |
| X020169 | AP2S1    | IPI00219840.4 | 64  | 2  | 2  | 2  | 1.12 | 0.97 | 1.08 | 1.03 | 0.99 |
| X020169 | AP3B1    | IPI00021129.4 | 743 | 20 | 13 | 13 | 0.97 | 1.02 | 1.00 | 0.99 | 1.07 |
| X020169 | AP3D1    | IPI00719680.1 | 789 | 21 | 12 | 13 | 1.11 | 1.04 | 1.11 | 1.02 | 1.12 |
| X020169 | AP3M1    | IPI00032459.1 | 123 | 4  | 4  | 4  | 1.18 | 1.36 | 1.11 | 1.01 | 1.00 |
| X020169 | AP3S1    | IPI00014624.2 | 114 | 3  | 2  | 2  | 1.16 | 1.21 | 1.06 | 0.97 | 1.09 |
| X020169 | APEX1    | IPI00215911.3 | 99  | 4  | 2  | 2  | 1.14 | 1.20 | 1.08 | 1.01 | 0.96 |
| X020169 | APIP     | IPI00911064.1 | 105 | 4  | 3  | 4  | 1.09 | 1.00 | 1.03 | 1.10 | 0.95 |
| X020169 | APOBEC3  | IPI00872929.2 | 90  | 4  | 3  | 3  | 1.40 | 1.02 | 1.06 | 1.06 | 1.00 |
| X020169 | ARCN1    | IPI00298520.3 | 270 | 8  | 5  | 5  | 1.09 | 0.95 | 0.93 | 0.89 | 0.88 |
| X020169 | ARG1     | IPI00398768.1 | 189 | 7  | 4  | 4  | 0.77 | 1.10 | 0.78 | 1.05 | 0.74 |
| X020169 | ARGLU1   | IPI00478834.3 | 307 | 14 | 7  | 7  | 1.01 | 1.10 | 1.04 | 1.01 | 1.03 |
| X020169 | ARHGEF2  | IPI00472160.5 | 159 | 6  | 3  | 3  | 1.09 | 1.04 | 0.97 | 0.97 | 0.94 |
| X020169 | ARL1     | IPI00219518.7 | 153 | 3  | 3  | 3  | 1.38 | 0.95 | 0.95 | 1.03 | 0.94 |
| X020169 | ARL6IP5  | IPI00007426.1 | 72  | 3  | 2  | 2  | 0.95 | 0.95 | 0.86 | 0.82 | 0.71 |
| X020169 | ARMET    | IPI00328748.4 | 169 | 5  | 3  | 3  | 1.18 | 1.36 | 1.05 | 1.00 | 1.15 |
| X020169 | ARPC3    | IPI00005162.3 | 39  | 2  | 2  | 2  | 0.98 | 1.05 | 0.90 | 1.03 | 1.02 |
| X020169 | ARPC4    | IPI00554811.2 | 177 | 6  | 4  | 4  | 1.28 | 0.91 | 0.80 | 0.78 | 0.81 |
| X020169 | ARPC5L   | IPI00414554.5 | 53  | 2  | 2  | 2  | 1.43 | 0.91 | 1.04 | 0.86 | 0.92 |
| X020169 | ARS2     | IPI00375144.5 | 354 | 11 | 9  | 9  | 1.22 | 1.05 | 1.14 | 1.05 | 1.09 |
| X020169 | ATAD3A   | IPI00643435.1 | 407 | 14 | 8  | 8  | 0.99 | 1.00 | 0.84 | 0.79 | 0.83 |
| X020169 | ATF2     | IPI00234446.2 | 52  | 2  | 2  | 2  | 0.98 | 1.06 | 1.00 | 0.95 | 0.95 |
| X020169 | ATP1A1   | IPI00006482.1 | 361 | 8  | 4  | 4  | 1.05 | 0.87 | 0.84 | 0.75 | 0.84 |

|         |          |               |      |     |    |     |      |      |      |      |      |
|---------|----------|---------------|------|-----|----|-----|------|------|------|------|------|
| X020169 | ATP5O    | IPI00007611.1 | 233  | 5   | 5  | 5   | 1.30 | 0.82 | 0.85 | 0.80 | 0.79 |
| X020169 | AUP1     | IPI00001891.1 | 56   | 2   | 2  | 2   | 0.91 | 0.69 | 0.75 | 0.85 | 0.75 |
| X020169 | B4DWA0   | IPI00744851.2 | 155  | 3   | 3  | 3   | 1.67 | 1.00 | 1.03 | 0.81 | 0.78 |
| X020169 | BAG2     | IPI00000643.1 | 161  | 4   | 3  | 3   | 1.31 | 0.81 | 0.90 | 0.78 | 0.78 |
| X020169 | BBX      | IPI00300222.6 | 88   | 3   | 2  | 2   | 0.84 | 1.00 | 0.89 | 0.87 | 0.92 |
| X020169 | BCAT1    | IPI00382412.4 | 155  | 4   | 3  | 3   | 1.07 | 1.11 | 1.14 | 1.06 | 1.10 |
| X020169 | BCLAF1   | IPI00006079.1 | 139  | 8   | 5  | 5   | 1.13 | 1.18 | 1.06 | 1.06 | 1.02 |
| X020169 | BOLA2    | IPI00301434.4 | 234  | 7   | 4  | 5   | 1.06 | 1.38 | 1.16 | 1.33 | 1.10 |
| X020169 | BTBD9    | IPI00396190.2 | 189  | 7   | 5  | 5   | 0.99 | 1.13 | 1.09 | 1.09 | 1.11 |
| X020169 | BTF3     | IPI00221035.4 | 252  | 8   | 3  | 3   | 1.24 | 1.23 | 1.10 | 1.03 | 1.00 |
| X020169 | BUB3     | IPI00013468.1 | 346  | 9   | 6  | 7   | 1.10 | 1.01 | 0.96 | 0.96 | 0.94 |
| X020169 | BUD31    | IPI00013180.2 | 92   | 3   | 3  | 3   | 1.37 | 1.19 | 0.95 | 0.93 | 0.97 |
| X020169 | BZW1     | IPI00916503.1 | 246  | 8   | 3  | 3   | 0.99 | 1.07 | 1.05 | 0.98 | 0.91 |
| X020169 | BZW2     | IPI00022305.4 | 283  | 10  | 7  | 7   | 1.17 | 0.96 | 0.84 | 0.85 | 0.88 |
| X020169 | C10ORF1  | IPI00478758.2 | 169  | 5   | 3  | 3   | 0.84 | 0.97 | 0.98 | 0.92 | 1.14 |
| X020169 | C11ORF31 | IPI00218054.2 | 113  | 2   | 2  | 2   | 1.11 | 1.24 | 1.01 | 0.99 | 0.97 |
| X020169 | C12ORF10 | IPI00029444.1 | 946  | 25  | 16 | 19  | 0.92 | 1.05 | 1.03 | 1.06 | 1.03 |
| X020169 | C14ORF16 | IPI00792100.1 | 381  | 9   | 5  | 5   | 0.99 | 0.94 | 0.82 | 0.88 | 0.81 |
| X020169 | C16ORF80 | IPI00001655.1 | 249  | 7   | 5  | 6   | 1.05 | 1.14 | 1.09 | 0.97 | 1.03 |
| X020169 | C16ORF88 | IPI00554560.4 | 120  | 4   | 2  | 2   | 1.05 | 1.01 | 1.06 | 0.93 | 0.94 |
| X020169 | C18ORF22 | IPI00103853.7 | 116  | 4   | 3  | 3   | 0.90 | 1.02 | 1.05 | 0.96 | 0.96 |
| X020169 | C19ORF43 | IPI00031526.3 | 119  | 5   | 2  | 2   | 0.98 | 1.09 | 0.95 | 0.86 | 0.98 |
| X020169 | C19ORF53 | IPI00022317.3 | 115  | 4   | 2  | 2   | 1.52 | 1.37 | 1.10 | 0.89 | 0.87 |
| X020169 | C1ORF128 | IPI00015351.2 | 149  | 7   | 5  | 5   | 0.85 | 0.96 | 0.95 | 1.01 | 0.93 |
| X020169 | C1ORF35  | IPI00293746.2 | 265  | 7   | 5  | 5   | 1.01 | 1.11 | 1.25 | 1.09 | 0.92 |
| X020169 | C21ORF70 | IPI00027898.3 | 141  | 4   | 3  | 3   | 1.37 | 1.29 | 1.23 | 1.01 | 1.03 |
| X020169 | C22ORF28 | IPI00550689.3 | 282  | 9   | 7  | 7   | 1.06 | 0.95 | 0.91 | 0.85 | 0.83 |
| X020169 | C3       | IPI00783987.2 | 199  | 6   | 4  | 4   | 1.13 | 1.05 | 1.09 | 1.04 | 0.99 |
| X020169 | C3ORF21  | IPI00171410.1 | 129  | 3   | 3  | 3   | 0.96 | 1.07 | 0.91 | 1.07 | 1.03 |
| X020169 | C3ORF26  | IPI00031679.2 | 89   | 3   | 3  | 3   | 1.56 | 0.93 | 0.99 | 0.80 | 0.81 |
| X020169 | C4B      | IPI00418163.3 | 405  | 14  | 6  | 6   | 1.02 | 1.17 | 1.13 | 1.16 | 1.03 |
| X020169 | C4ORF43  | IPI00019962.3 | 157  | 6   | 3  | 3   | 0.94 | 1.09 | 0.97 | 0.86 | 1.09 |
| X020169 | C8B      | IPI00294395.1 | 103  | 4   | 2  | 2   | 0.80 | 1.08 | 0.96 | 0.99 | 0.86 |
| X020169 | C9ORF86  | IPI00827967.1 | 443  | 12  | 2  | 2   | 1.13 | 1.30 | 1.23 | 1.21 | 1.20 |
| X020169 | CA2      | IPI00218414.5 | 124  | 2   | 2  | 2   | 1.20 | 1.18 | 1.07 | 1.23 | 1.11 |
| X020169 | CACYBP   | IPI00395627.3 | 342  | 8   | 6  | 6   | 1.28 | 0.95 | 0.91 | 0.79 | 0.89 |
| X020169 | CAD      | IPI00301263.2 | 5695 | 196 | 98 | 148 | 1.01 | 0.98 | 1.11 | 1.16 | 1.24 |
| X020169 | CALM1    | IPI00916600.1 | 117  | 5   | 2  | 2   | 1.29 | 0.96 | 0.82 | 0.87 | 0.94 |
| X020169 | CALML5   | IPI00021536.2 | 175  | 5   | 4  | 4   | 1.12 | 1.16 | 0.84 | 1.94 | 0.97 |
| X020169 | CAND1    | IPI00100160.3 | 151  | 5   | 3  | 3   | 0.96 | 0.77 | 1.05 | 0.92 | 0.90 |

|         |        |               |      |    |    |    |      |      |      |      |      |
|---------|--------|---------------|------|----|----|----|------|------|------|------|------|
| X020169 | CANX   | IPI00020984.2 | 367  | 12 | 6  | 6  | 1.98 | 0.86 | 0.91 | 0.76 | 0.73 |
| X020169 | CAP1   | IPI00008274.7 | 287  | 8  | 4  | 4  | 1.24 | 0.74 | 0.77 | 0.72 | 0.68 |
| X020169 | CAPN1  | IPI00011285.1 | 239  | 6  | 4  | 4  | 0.99 | 0.85 | 0.84 | 0.88 | 0.78 |
| X020169 | CAPN6  | IPI00002547.1 | 492  | 12 | 10 | 10 | 0.93 | 1.12 | 1.06 | 1.03 | 0.99 |
| X020169 | CAPZA1 | IPI00005969.3 | 578  | 12 | 5  | 5  | 1.04 | 1.09 | 0.98 | 1.02 | 0.97 |
| X020169 | CAPZB  | IPI00218782.3 | 380  | 9  | 7  | 7  | 0.99 | 1.01 | 0.92 | 0.93 | 0.93 |
| X020169 | CARM1  | IPI00639957.2 | 219  | 6  | 4  | 4  | 1.00 | 1.16 | 1.06 | 1.08 | 1.09 |
| X020169 | CARS   | IPI00027443.5 | 225  | 10 | 6  | 6  | 0.93 | 0.94 | 1.04 | 1.06 | 0.94 |
| X020169 | CAT    | IPI00465436.4 | 499  | 13 | 9  | 9  | 0.93 | 0.86 | 0.86 | 1.01 | 0.80 |
| X020169 | CBS    | IPI00219649.4 | 474  | 12 | 10 | 10 | 1.03 | 1.08 | 1.04 | 1.02 | 0.98 |
| X020169 | CBX5   | IPI00024662.1 | 87   | 5  | 2  | 2  | 1.46 | 1.01 | 0.88 | 0.84 | 0.92 |
| X020169 | CCAR1  | IPI00217357.2 | 212  | 6  | 2  | 2  | 0.97 | 1.04 | 1.04 | 0.95 | 1.13 |
| X020169 | CCDC55 | IPI00790230.1 | 463  | 15 | 12 | 13 | 1.10 | 1.21 | 1.10 | 1.09 | 1.07 |
| X020169 | CCDC59 | IPI00329594.4 | 185  | 5  | 3  | 4  | 1.04 | 1.20 | 1.14 | 1.02 | 1.14 |
| X020169 | CCDC72 | IPI00006378.3 | 83   | 2  | 2  | 2  | 1.00 | 1.55 | 1.14 | 1.12 | 1.12 |
| X020169 | CCNK   | IPI00783214.2 | 494  | 11 | 10 | 10 | 1.05 | 1.11 | 1.11 | 1.01 | 0.99 |
| X020169 | CCT2   | IPI00297779.7 | 723  | 21 | 14 | 15 | 1.29 | 0.84 | 0.97 | 0.91 | 0.79 |
| X020169 | CCT3   | IPI00553185.2 | 602  | 15 | 10 | 11 | 1.17 | 0.80 | 0.79 | 0.73 | 0.73 |
| X020169 | CCT4   | IPI00302927.6 | 721  | 17 | 14 | 14 | 1.15 | 0.82 | 0.81 | 0.81 | 0.79 |
| X020169 | CCT5   | IPI00010720.1 | 784  | 23 | 15 | 15 | 1.12 | 0.80 | 0.82 | 0.72 | 0.74 |
| X020169 | CCT6A  | IPI00027626.3 | 475  | 14 | 11 | 11 | 1.09 | 0.77 | 0.75 | 0.70 | 0.68 |
| X020169 | CCT7   | IPI00018465.1 | 786  | 21 | 14 | 14 | 1.24 | 0.80 | 0.82 | 0.73 | 0.75 |
| X020169 | CCT8   | IPI00784090.2 | 1161 | 32 | 20 | 20 | 1.21 | 0.77 | 0.78 | 0.68 | 0.70 |
| X020169 | CD2BP2 | IPI00006103.1 | 255  | 7  | 5  | 6  | 1.09 | 1.12 | 1.02 | 0.94 | 0.93 |
| X020169 | CDA    | IPI00027983.1 | 118  | 3  | 2  | 2  | 0.94 | 1.07 | 0.98 | 1.02 | 1.07 |
| X020169 | CDC2L1 | IPI00215999.1 | 589  | 20 | 15 | 15 | 1.17 | 0.91 | 0.95 | 0.87 | 0.92 |
| X020169 | CDC42  | IPI00909484.1 | 306  | 8  | 5  | 5  | 1.55 | 0.89 | 0.94 | 0.78 | 0.79 |
| X020169 | CDC5L  | IPI00465294.2 | 160  | 5  | 4  | 4  | 1.14 | 1.22 | 1.11 | 0.99 | 0.95 |
| X020169 | CDC73  | IPI00300659.4 | 699  | 21 | 12 | 12 | 1.01 | 1.14 | 1.07 | 0.99 | 1.14 |
| X020169 | CDK2   | IPI00031681.1 | 238  | 6  | 4  | 4  | 1.37 | 1.00 | 0.95 | 0.92 | 0.97 |
| X020169 | CDK6   | IPI00023529.1 | 45   | 2  | 2  | 2  | 1.13 | 0.89 | 0.96 | 1.00 | 0.91 |
| X020169 | CDK9   | IPI00552413.2 | 127  | 4  | 4  | 4  | 1.00 | 1.06 | 0.99 | 1.04 | 0.99 |
| X020169 | CFL1   | IPI00012011.6 | 346  | 8  | 4  | 4  | 1.42 | 0.90 | 0.89 | 0.82 | 0.82 |
| X020169 | CHD4   | IPI00455210.1 | 311  | 12 | 7  | 7  | 0.97 | 1.12 | 1.06 | 1.11 | 1.13 |
| X020169 | CHEK1  | IPI00023664.3 | 71   | 4  | 2  | 2  | 0.90 | 1.14 | 1.01 | 1.01 | 0.99 |
| X020169 | CHERP  | IPI00333010.8 | 358  | 11 | 6  | 6  | 1.12 | 1.06 | 1.05 | 1.06 | 1.14 |
| X020169 | ch-TOG | IPI00028275.2 | 237  | 10 | 3  | 3  | 1.19 | 0.96 | 0.99 | 0.89 | 1.02 |
| X020169 | CIP29  | IPI00798360.1 | 147  | 5  | 4  | 4  | 1.18 | 1.03 | 0.96 | 0.80 | 0.88 |
| X020169 | CKAP4  | IPI00141318.2 | 836  | 19 | 13 | 13 | 1.03 | 1.24 | 1.02 | 1.06 | 0.97 |
| X020169 | CKB    | IPI00022977.1 | 132  | 6  | 3  | 3  | 1.46 | 0.96 | 1.05 | 1.06 | 0.90 |

|         |         |               |      |    |    |    |      |      |      |      |      |
|---------|---------|---------------|------|----|----|----|------|------|------|------|------|
| X020169 | CLTC    | IPI00024067.4 | 783  | 24 | 15 | 15 | 0.87 | 0.73 | 0.84 | 0.80 | 0.85 |
| X020169 | CMAS    | IPI00303158.3 | 240  | 6  | 5  | 5  | 1.21 | 1.15 | 1.06 | 1.03 | 0.98 |
| X020169 | CMBL    | IPI00383046.3 | 453  | 14 | 9  | 10 | 1.04 | 1.07 | 1.06 | 1.05 | 1.02 |
| X020169 | CNBP    | IPI00895806.1 | 123  | 4  | 2  | 2  | 1.82 | 0.80 | 0.72 | 0.73 | 0.66 |
| X020169 | CNN2    | IPI00910593.1 | 373  | 9  | 5  | 5  | 0.88 | 1.04 | 0.93 | 0.93 | 0.91 |
| X020169 | CNN3    | IPI00873410.1 | 94   | 2  | 2  | 2  | 0.82 | 0.92 | 0.97 | 1.04 | 0.95 |
| X020169 | CNOT1   | IPI00166010.6 | 135  | 7  | 2  | 2  | 1.21 | 0.85 | 1.48 | 1.32 | 0.84 |
| X020169 | CNP     | IPI00306667.5 | 84   | 5  | 2  | 2  | 1.04 | 1.07 | 1.03 | 1.01 | 0.96 |
| X020169 | COIL    | IPI00006442.1 | 70   | 3  | 2  | 2  | 1.17 | 0.99 | 0.93 | 0.94 | 0.77 |
| X020169 | COL14A1 | IPI00176193.6 | 218  | 5  | 4  | 4  | 1.08 | 1.04 | 1.18 | 1.08 | 1.11 |
| X020169 | COMT    | IPI00011284.1 | 380  | 8  | 5  | 5  | 1.98 | 0.83 | 0.86 | 0.83 | 0.83 |
| X020169 | COPA    | IPI00646493.1 | 289  | 8  | 4  | 4  | 0.96 | 0.73 | 0.97 | 0.67 | 0.87 |
| X020169 | COPB1   | IPI00295851.4 | 576  | 15 | 10 | 10 | 0.96 | 0.88 | 0.95 | 0.86 | 0.90 |
| X020169 | COPS5   | IPI00009958.6 | 75   | 3  | 2  | 2  | 1.10 | 0.96 | 0.83 | 0.89 | 0.76 |
| X020169 | CORO1C  | IPI00867509.1 | 480  | 13 | 8  | 8  | 1.06 | 0.98 | 0.94 | 0.90 | 0.97 |
| X020169 | COX17   | IPI00218144.3 | 120  | 3  | 2  | 2  | 1.03 | 1.19 | 1.20 | 1.22 | 0.97 |
| X020169 | CPOX    | IPI00093057.6 | 41   | 2  | 2  | 2  | 1.45 | 1.12 | 1.06 | 1.23 | 1.10 |
| X020169 | CPSF1   | IPI00026219.4 | 1004 | 30 | 18 | 18 | 0.96 | 0.96 | 1.06 | 1.04 | 1.14 |
| X020169 | CPSF2   | IPI00419531.2 | 810  | 21 | 11 | 11 | 1.09 | 1.14 | 1.14 | 0.97 | 1.09 |
| X020169 | CPSF3   | IPI00007818.3 | 417  | 12 | 9  | 9  | 0.92 | 1.07 | 1.06 | 0.93 | 1.03 |
| X020169 | CPSF4   | IPI00009137.1 | 221  | 7  | 5  | 5  | 0.95 | 1.02 | 0.95 | 1.08 | 1.00 |
| X020169 | CPSF6   | IPI00030654.1 | 597  | 20 | 10 | 15 | 1.00 | 1.20 | 1.12 | 1.10 | 1.10 |
| X020169 | CRKL    | IPI00004839.1 | 918  | 22 | 16 | 19 | 0.91 | 1.09 | 1.06 | 1.02 | 1.04 |
| X020169 | CRKRS   | IPI00021175.1 | 431  | 11 | 5  | 5  | 0.91 | 0.90 | 0.94 | 0.94 | 0.91 |
| X020169 | CROP    | IPI00107745.3 | 783  | 23 | 12 | 13 | 0.94 | 1.12 | 1.00 | 0.98 | 1.00 |
| X020169 | CSE1L   | IPI00022744.5 | 957  | 24 | 18 | 18 | 0.85 | 0.90 | 0.84 | 0.73 | 0.83 |
| X020169 | CSH1    | IPI00025785.2 | 356  | 13 | 5  | 9  | 0.94 | 1.11 | 1.05 | 1.08 | 1.05 |
| X020169 | CSK     | IPI00013212.1 | 349  | 8  | 5  | 5  | 0.92 | 0.98 | 1.06 | 0.98 | 1.35 |
| X020169 | CSNK1A1 | IPI00448798.6 | 104  | 3  | 2  | 2  | 1.40 | 1.59 | 1.18 | 1.23 | 1.28 |
| X020169 | CSNK2A1 | IPI00016613.2 | 180  | 4  | 3  | 3  | 1.09 | 1.07 | 1.04 | 0.93 | 1.12 |
| X020169 | CSRP2   | IPI00002824.7 | 377  | 14 | 5  | 5  | 0.79 | 1.00 | 0.92 | 0.97 | 0.95 |
| X020169 | CSTA    | IPI00032325.1 | 258  | 9  | 4  | 4  | 1.73 | 0.96 | 0.78 | 3.29 | 0.76 |
| X020169 | CSTB    | IPI00021828.1 | 348  | 10 | 6  | 6  | 0.94 | 1.09 | 0.99 | 1.10 | 1.06 |
| X020169 | CSTF2   | IPI00902991.1 | 210  | 5  | 3  | 3  | 1.16 | 0.97 | 0.88 | 0.98 | 0.85 |
| X020169 | CTNND1  | IPI00182540.5 | 187  | 7  | 4  | 4  | 1.04 | 1.01 | 1.10 | 1.04 | 1.03 |
| X020169 | CTPS    | IPI00290142.5 | 828  | 19 | 11 | 11 | 0.94 | 1.01 | 1.01 | 1.01 | 1.01 |
| X020169 | CTPS2   | IPI00645702.1 | 265  | 8  | 5  | 5  | 1.10 | 1.02 | 0.98 | 0.95 | 0.95 |
| X020169 | CTSB    | IPI00295741.4 | 84   | 3  | 2  | 3  | 1.22 | 1.08 | 0.99 | 1.05 | 0.95 |
| X020169 | CTSC    | IPI00022810.1 | 69   | 3  | 2  | 2  | 0.89 | 0.85 | 0.86 | 0.91 | 0.85 |
| X020169 | CTSD    | IPI00011229.1 | 466  | 11 | 9  | 10 | 1.10 | 0.90 | 0.87 | 0.92 | 0.75 |



|         |         |               |      |    |    |    |      |      |      |      |      |
|---------|---------|---------------|------|----|----|----|------|------|------|------|------|
| X020169 | CTTN    | IPI00746806.1 | 428  | 15 | 9  | 9  | 0.98 | 1.05 | 0.98 | 0.99 | 0.98 |
| X020169 | CUL3    | IPI00014312.1 | 213  | 9  | 4  | 5  | 1.02 | 1.14 | 1.13 | 1.11 | 1.09 |
| X020169 | CUL5    | IPI00216003.4 | 118  | 7  | 2  | 2  | 1.05 | 0.97 | 1.10 | 1.27 | 0.91 |
| X020169 | CUTA    | IPI00034319.2 | 112  | 2  | 2  | 2  | 1.19 | 1.10 | 0.96 | 1.03 | 1.02 |
| X020169 | CXORF26 | IPI00107104.1 | 94   | 4  | 2  | 2  | 1.04 | 0.96 | 0.88 | 0.92 | 0.83 |
| X020169 | CXORF56 | IPI00005055.4 | 147  | 3  | 3  | 3  | 1.01 | 1.09 | 1.12 | 1.00 | 1.05 |
| X020169 | CYFIP1  | IPI00903062.1 | 156  | 6  | 3  | 3  | 0.91 | 0.93 | 0.93 | 1.11 | 0.93 |
| X020169 | CYP11A1 | IPI00295771.6 | 351  | 10 | 6  | 6  | 0.76 | 1.06 | 0.93 | 0.94 | 0.87 |
| X020169 | CYP19A1 | IPI00879236.1 | 472  | 11 | 11 | 11 | 0.94 | 1.00 | 1.02 | 1.11 | 1.02 |
| X020169 | DAP3    | IPI00018120.1 | 166  | 4  | 2  | 2  | 1.09 | 0.82 | 0.95 | 0.92 | 0.89 |
| X020169 | DARS    | IPI00216951.2 | 597  | 16 | 9  | 9  | 1.03 | 0.91 | 0.91 | 0.91 | 0.84 |
| X020169 | DAZAP1  | IPI00165230.1 | 163  | 6  | 2  | 2  | 1.56 | 0.73 | 0.76 | 0.77 | 0.79 |
| X020169 | DCD     | IPI00847793.1 | 370  | 11 | 7  | 10 | 1.85 | 0.87 | 0.84 | 2.00 | 0.92 |
| X020169 | DCN     | IPI00012119.1 | 106  | 3  | 3  | 3  | 1.12 | 0.95 | 2.10 | 1.14 | 0.83 |
| X020169 | DCTD    | IPI00554705.1 | 120  | 4  | 3  | 3  | 1.07 | 1.17 | 1.08 | 1.26 | 1.07 |
| X020169 | DDB1    | IPI00293464.5 | 582  | 17 | 12 | 12 | 0.98 | 0.90 | 0.92 | 0.98 | 0.99 |
| X020169 | DDX1    | IPI00293655.3 | 407  | 12 | 10 | 11 | 1.08 | 1.05 | 1.00 | 0.99 | 0.97 |
| X020169 | DDX17   | IPI00023785.6 | 727  | 23 | 14 | 16 | 1.17 | 1.01 | 0.98 | 0.86 | 0.95 |
| X020169 | DDX21   | IPI00015953.3 | 308  | 8  | 3  | 3  | 0.99 | 0.78 | 0.88 | 0.66 | 0.68 |
| X020169 | DDX23   | IPI00006725.2 | 318  | 9  | 7  | 7  | 1.21 | 0.92 | 0.99 | 0.88 | 0.91 |
| X020169 | DDX3X   | IPI00215637.5 | 1255 | 33 | 22 | 24 | 1.12 | 1.12 | 1.11 | 0.96 | 0.97 |
| X020169 | DDX41   | IPI00007208.4 | 142  | 4  | 3  | 3  | 1.02 | 1.01 | 1.07 | 0.91 | 1.05 |
| X020169 | DDX42   | IPI00409671.3 | 514  | 12 | 9  | 9  | 1.16 | 1.01 | 1.01 | 0.93 | 0.98 |
| X020169 | DDX46   | IPI00329791.9 | 1738 | 51 | 32 | 36 | 0.82 | 0.91 | 0.92 | 0.91 | 0.92 |
| X020169 | DDX47   | IPI00023972.5 | 247  | 9  | 3  | 3  | 1.22 | 1.18 | 1.17 | 1.16 | 1.09 |
| X020169 | DDX49   | IPI00003739.5 | 222  | 6  | 3  | 4  | 1.15 | 1.22 | 1.10 | 0.99 | 1.11 |
| X020169 | DDX5    | IPI00017617.1 | 1168 | 32 | 20 | 20 | 1.27 | 1.05 | 1.01 | 0.87 | 0.93 |
| X020169 | DDX52   | IPI00032423.2 | 65   | 2  | 2  | 2  | 1.95 | 1.18 | 1.27 | 0.76 | 0.94 |
| X020169 | DEK     | IPI00871695.1 | 492  | 14 | 11 | 12 | 1.41 | 0.88 | 0.98 | 0.82 | 0.78 |
| X020169 | DENR    | IPI00306280.3 | 241  | 5  | 3  | 3  | 1.26 | 0.97 | 1.02 | 0.96 | 1.07 |
| X020169 | DHCR24  | IPI00016703.2 | 91   | 4  | 2  | 2  | 0.90 | 0.81 | 0.83 | 0.69 | 0.71 |
| X020169 | DHFR    | IPI00887771.1 | 1037 | 70 | 15 | 35 | 0.93 | 1.22 | 1.14 | 1.15 | 1.16 |
| X020169 | DHX15   | IPI00396435.3 | 1301 | 39 | 26 | 32 | 1.02 | 1.14 | 1.10 | 1.06 | 1.05 |
| X020169 | DHX16   | IPI00297178.6 | 359  | 14 | 5  | 5  | 1.15 | 1.15 | 1.10 | 1.07 | 1.16 |
| X020169 | DHX36   | IPI00027415.2 | 426  | 11 | 7  | 7  | 0.95 | 0.89 | 1.05 | 1.02 | 1.06 |
| X020169 | DHX38   | IPI00294211.2 | 125  | 4  | 2  | 2  | 0.92 | 0.98 | 0.94 | 1.03 | 0.81 |
| X020169 | DHX40   | IPI00410110.3 | 122  | 4  | 3  | 3  | 0.92 | 0.88 | 0.95 | 0.98 | 0.93 |
| X020169 | DHX57   | IPI00168885.5 | 75   | 5  | 2  | 2  | 0.72 | 0.70 | 0.94 | 0.96 | 0.88 |
| X020169 | DHX8    | IPI00031508.1 | 116  | 5  | 2  | 2  | 0.88 | 1.04 | 0.92 | 1.19 | 0.92 |
| X020169 | DHX9    | IPI00844578.1 | 369  | 10 | 7  | 7  | 1.03 | 0.72 | 0.76 | 0.65 | 0.75 |

|         |          |               |      |    |    |    |      |      |      |      |      |
|---------|----------|---------------|------|----|----|----|------|------|------|------|------|
| X020169 | DIAPH1   | IPI00852685.1 | 225  | 9  | 5  | 5  | 0.81 | 0.80 | 0.85 | 0.83 | 0.81 |
| X020169 | DIDO1    | IPI00619921.3 | 167  | 7  | 3  | 3  | 1.07 | 1.13 | 1.05 | 1.07 | 0.99 |
| X020169 | DJ-1     | IPI00298547.3 | 533  | 12 | 10 | 11 | 1.17 | 1.06 | 1.04 | 1.01 | 1.01 |
| X020169 | DLD      | IPI00015911.1 | 289  | 11 | 7  | 7  | 1.59 | 0.82 | 0.80 | 0.72 | 0.74 |
| X020169 | DNAJA1   | IPI00012535.1 | 99   | 5  | 3  | 3  | 0.93 | 0.99 | 0.90 | 0.90 | 0.91 |
| X020169 | DNAJA3   | IPI00294610.3 | 40   | 2  | 2  | 2  | 1.10 | 0.92 | 0.95 | 0.84 | 0.86 |
| X020169 | DNAJC10  | IPI00293260.5 | 1000 | 25 | 19 | 20 | 0.92 | 1.12 | 1.12 | 1.13 | 1.12 |
| X020169 | DNAJC7   | IPI00329629.6 | 92   | 5  | 2  | 2  | 0.98 | 0.99 | 0.97 | 1.06 | 0.98 |
| X020169 | DNAJC8   | IPI00003438.2 | 188  | 8  | 6  | 6  | 1.12 | 1.21 | 1.03 | 0.97 | 1.02 |
| X020169 | DNAJC9   | IPI00154975.3 | 471  | 11 | 7  | 7  | 1.56 | 0.92 | 1.08 | 0.85 | 0.75 |
| X020169 | DNPEP    | IPI00015856.4 | 520  | 12 | 9  | 9  | 0.86 | 1.00 | 0.99 | 1.00 | 0.97 |
| X020169 | DR1      | IPI00008991.1 | 117  | 3  | 2  | 2  | 1.09 | 1.09 | 1.05 | 0.96 | 1.03 |
| X020169 | DRG1     | IPI00031836.3 | 430  | 11 | 6  | 6  | 1.22 | 1.14 | 1.03 | 0.90 | 1.01 |
| X020169 | DSC3     | IPI00031549.5 | 124  | 4  | 2  | 2  | 0.79 | 0.81 | 0.80 | 0.77 | 0.74 |
| X020169 | DSG1     | IPI00025753.1 | 891  | 23 | 14 | 19 | 0.67 | 0.90 | 0.72 | 0.85 | 0.68 |
| X020169 | DSTN     | IPI00473014.5 | 248  | 7  | 4  | 4  | 0.93 | 0.98 | 0.96 | 1.02 | 1.06 |
| X020169 | DUT      | IPI00749113.2 | 417  | 9  | 8  | 8  | 1.00 | 1.15 | 1.09 | 1.12 | 1.00 |
| X020169 | DYNC1H1  | IPI00456969.1 | 838  | 32 | 13 | 13 | 1.02 | 0.93 | 0.99 | 1.10 | 1.05 |
| X020169 | DYNC1I2  | IPI00744015.1 | 50   | 2  | 2  | 2  | 0.99 | 0.95 | 1.06 | 1.14 | 0.88 |
| X020169 | EBNA1BP2 | IPI00745955.3 | 113  | 3  | 3  | 3  | 1.06 | 0.89 | 0.87 | 0.77 | 0.77 |
| X020169 | ECH1     | IPI00011416.2 | 180  | 4  | 2  | 2  | 1.94 | 0.83 | 0.78 | 0.72 | 0.72 |
| X020169 | EDC3     | IPI00018009.2 | 86   | 4  | 2  | 2  | 0.94 | 1.06 | 1.05 | 0.97 | 1.12 |
| X020169 | EDF1     | IPI00021570.1 | 133  | 4  | 4  | 4  | 1.26 | 1.30 | 1.11 | 0.99 | 0.96 |
| X020169 | EEF1A1   | IPI00396485.3 | 1035 | 43 | 7  | 11 | 1.21 | 1.17 | 1.17 | 1.00 | 1.04 |
| X020169 | EEF1B2   | IPI00178440.3 | 283  | 10 | 6  | 6  | 1.38 | 0.82 | 0.93 | 0.72 | 0.84 |
| X020169 | EEF1D    | IPI00642971.3 | 416  | 9  | 6  | 6  | 1.30 | 0.81 | 0.83 | 0.75 | 0.71 |
| X020169 | EEF1E1   | IPI00003588.1 | 151  | 4  | 3  | 3  | 1.19 | 0.80 | 0.88 | 0.71 | 0.75 |
| X020169 | EEF1G    | IPI00000875.7 | 557  | 17 | 13 | 13 | 1.23 | 0.95 | 0.90 | 0.86 | 0.84 |
| X020169 | EEF2     | IPI00186290.6 | 1044 | 30 | 19 | 20 | 1.09 | 0.81 | 0.80 | 0.69 | 0.78 |
| X020169 | EFHD2    | IPI00060181.1 | 234  | 6  | 5  | 5  | 1.18 | 1.07 | 1.01 | 1.00 | 0.98 |
| X020169 | EFTUD2   | IPI00003519.1 | 1273 | 29 | 22 | 24 | 1.01 | 0.97 | 0.98 | 0.93 | 1.08 |
| X020169 | EIF1AP1  | IPI00232533.5 | 337  | 12 | 8  | 8  | 1.03 | 1.40 | 1.17 | 1.04 | 1.20 |
| X020169 | EIF2B3   | IPI00006504.3 | 129  | 4  | 3  | 3  | 1.10 | 0.88 | 0.83 | 0.82 | 0.81 |
| X020169 | EIF2S1   | IPI00219678.3 | 304  | 10 | 7  | 8  | 1.28 | 1.13 | 1.05 | 0.85 | 0.94 |
| X020169 | EIF2S2   | IPI00021728.3 | 476  | 11 | 10 | 11 | 1.18 | 1.12 | 0.98 | 0.91 | 0.86 |
| X020169 | EIF2S3   | IPI00297982.7 | 453  | 11 | 8  | 8  | 1.19 | 1.13 | 0.99 | 0.81 | 0.86 |
| X020169 | EIF3A    | IPI00029012.1 | 332  | 15 | 7  | 7  | 1.09 | 0.88 | 1.02 | 0.91 | 0.92 |
| X020169 | EIF3B    | IPI00719752.2 | 633  | 17 | 9  | 9  | 1.03 | 0.97 | 0.99 | 0.93 | 1.10 |
| X020169 | EIF3C    | IPI00646839.1 | 376  | 11 | 7  | 7  | 0.95 | 0.95 | 0.89 | 0.91 | 0.85 |
| X020169 | EIF3D    | IPI00006181.1 | 218  | 6  | 4  | 4  | 1.04 | 1.04 | 1.13 | 0.90 | 0.90 |

|         |         |               |      |    |    |    |      |      |      |      |      |
|---------|---------|---------------|------|----|----|----|------|------|------|------|------|
| X020169 | EIF3E   | IPI00013068.1 | 460  | 12 | 9  | 9  | 1.08 | 1.06 | 1.05 | 0.94 | 0.94 |
| X020169 | EIF3F   | IPI00654777.2 | 272  | 9  | 6  | 6  | 1.14 | 1.16 | 1.11 | 1.03 | 0.98 |
| X020169 | EIF3G   | IPI00290460.3 | 367  | 8  | 6  | 6  | 1.15 | 1.16 | 1.06 | 0.90 | 0.95 |
| X020169 | EIF3H   | IPI00647650.3 | 268  | 6  | 4  | 4  | 0.96 | 1.09 | 1.02 | 0.95 | 0.98 |
| X020169 | EIF3I   | IPI00012795.3 | 275  | 9  | 6  | 6  | 1.08 | 1.07 | 0.98 | 0.95 | 0.99 |
| X020169 | EIF3J   | IPI00290461.3 | 75   | 3  | 2  | 2  | 1.44 | 1.07 | 0.98 | 0.89 | 0.90 |
| X020169 | EIF3K   | IPI00033143.1 | 155  | 4  | 3  | 3  | 1.25 | 1.10 | 1.02 | 0.94 | 1.02 |
| X020169 | EIF3L   | IPI00465233.1 | 544  | 13 | 8  | 8  | 0.95 | 1.10 | 0.99 | 0.87 | 0.93 |
| X020169 | EIF3M   | IPI00102069.5 | 426  | 9  | 7  | 7  | 1.02 | 1.16 | 1.04 | 0.92 | 0.99 |
| X020169 | EIF4A3  | IPI00009328.4 | 135  | 4  | 3  | 3  | 1.39 | 0.81 | 0.79 | 0.81 | 0.74 |
| X020169 | EIF4B   | IPI00012079.3 | 342  | 13 | 6  | 6  | 1.12 | 1.13 | 1.06 | 0.94 | 0.97 |
| X020169 | EIF4E   | IPI00908416.1 | 70   | 2  | 2  | 2  | 0.85 | 0.89 | 0.91 | 0.87 | 0.92 |
| X020169 | EIF4G1  | IPI00552639.2 | 230  | 8  | 4  | 4  | 0.96 | 0.93 | 0.91 | 0.82 | 0.88 |
| X020169 | EIF4H   | IPI00014263.1 | 141  | 3  | 2  | 2  | 1.33 | 1.07 | 0.94 | 0.75 | 0.86 |
| X020169 | EIF5    | IPI00022648.2 | 275  | 6  | 5  | 5  | 1.01 | 1.04 | 1.05 | 0.92 | 1.01 |
| X020169 | EIF5B   | IPI00299254.3 | 1641 | 50 | 35 | 38 | 1.05 | 0.98 | 0.99 | 0.95 | 0.95 |
| X020169 | EPB41L2 | IPI00015973.1 | 307  | 10 | 7  | 7  | 1.04 | 1.03 | 1.08 | 0.95 | 1.02 |
| X020169 | EPB41L5 | IPI00376221.2 | 177  | 5  | 2  | 2  | 1.00 | 1.08 | 1.02 | 1.01 | 1.08 |
| X020169 | EPRS    | IPI00013452.9 | 1086 | 30 | 18 | 18 | 0.91 | 0.79 | 0.89 | 0.92 | 0.92 |
| X020169 | ERH     | IPI00029631.1 | 126  | 3  | 3  | 3  | 1.18 | 1.06 | 1.04 | 1.03 | 0.97 |
| X020169 | ERO1L   | IPI00872773.1 | 205  | 4  | 3  | 3  | 0.97 | 0.94 | 0.96 | 0.97 | 0.96 |
| X020169 | ERP29   | IPI00024911.1 | 219  | 4  | 4  | 4  | 1.55 | 1.08 | 0.85 | 0.91 | 0.87 |
| X020169 | EXOSC10 | IPI00009464.1 | 104  | 3  | 3  | 3  | 1.08 | 1.07 | 1.02 | 0.90 | 0.97 |
| X020169 | EZR     | IPI00872684.1 | 270  | 10 | 6  | 6  | 1.05 | 1.02 | 0.91 | 0.91 | 0.87 |
| X020169 | F13A1   | IPI00884176.1 | 259  | 9  | 3  | 3  | 1.25 | 0.99 | 1.02 | 1.04 | 0.98 |
| X020169 | FAM32A  | IPI00022402.3 | 134  | 3  | 3  | 3  | 1.03 | 1.26 | 1.07 | 1.01 | 1.16 |
| X020169 | FAM46A  | IPI00647115.1 | 55   | 4  | 2  | 2  | 0.95 | 1.09 | 1.20 | 1.39 | 1.29 |
| X020169 | FAM62A  | IPI00746655.1 | 363  | 9  | 7  | 7  | 1.20 | 0.86 | 0.81 | 0.85 | 0.86 |
| X020169 | FAM76B  | IPI00552849.2 | 208  | 8  | 5  | 5  | 1.00 | 1.24 | 1.14 | 1.03 | 1.13 |
| X020169 | FANCI   | IPI00306518.3 | 88   | 3  | 3  | 3  | 0.79 | 0.92 | 0.92 | 0.84 | 0.91 |
| X020169 | FARSA   | IPI00031820.3 | 506  | 14 | 6  | 6  | 1.00 | 1.00 | 0.94 | 0.97 | 0.91 |
| X020169 | FARSB   | IPI00300074.3 | 797  | 22 | 15 | 15 | 1.03 | 0.98 | 1.00 | 1.12 | 1.00 |
| X020169 | FASN    | IPI00026781.2 | 2894 | 71 | 51 | 53 | 0.98 | 0.94 | 1.01 | 1.07 | 1.13 |
| X020169 | FBL     | IPI00025039.1 | 250  | 7  | 4  | 4  | 1.13 | 0.92 | 0.92 | 0.87 | 0.76 |
| X020169 | FBLN1   | IPI00889740.1 | 447  | 14 | 7  | 7  | 0.89 | 1.11 | 1.09 | 1.04 | 1.24 |
| X020169 | FBXO22  | IPI00183208.3 | 414  | 9  | 8  | 8  | 1.07 | 1.15 | 1.05 | 1.24 | 1.05 |
| X020169 | FEN1    | IPI00026215.1 | 306  | 9  | 4  | 4  | 1.09 | 1.05 | 1.00 | 0.76 | 0.91 |
| X020169 | FERMT3  | IPI00397834.1 | 124  | 4  | 3  | 3  | 1.40 | 0.78 | 0.85 | 0.82 | 0.76 |
| X020169 | FHL1    | IPI00014398.2 | 127  | 4  | 2  | 2  | 1.09 | 1.02 | 0.84 | 0.90 | 0.91 |
| X020169 | FIP1L1  | IPI00395337.1 | 482  | 12 | 10 | 11 | 0.93 | 1.10 | 1.04 | 1.04 | 1.00 |

|         |          |                |      |     |    |     |      |      |      |      |      |
|---------|----------|----------------|------|-----|----|-----|------|------|------|------|------|
| X020169 | FKBP1A   | IPI00873810.1  | 180  | 5   | 2  | 2   | 1.14 | 1.06 | 0.99 | 1.02 | 0.93 |
| X020169 | FKBP3    | IPI00024157.1  | 114  | 5   | 3  | 3   | 1.28 | 1.06 | 0.95 | 0.92 | 0.92 |
| X020169 | FLAD1    | IPI00220299.1  | 97   | 4   | 3  | 3   | 1.02 | 1.00 | 1.10 | 1.28 | 0.98 |
| X020169 | FLJ11151 | IPI00305010.3  | 295  | 6   | 3  | 3   | 0.85 | 1.05 | 1.01 | 1.00 | 1.08 |
| X020169 | FLJ12529 | IPI00915356.1  | 599  | 16  | 13 | 14  | 1.02 | 1.24 | 1.10 | 1.08 | 1.09 |
| X020169 | FLNA     | IPI00333541.6  | 1945 | 51  | 28 | 28  | 0.99 | 0.87 | 0.94 | 0.91 | 0.94 |
| X020169 | FLNB     | IPI00900293.1  | 166  | 5   | 2  | 2   | 1.20 | 0.90 | 0.90 | 0.88 | 0.83 |
| X020169 | FN3K     | IPI00023729.1  | 325  | 8   | 7  | 7   | 1.00 | 1.02 | 0.99 | 1.04 | 1.04 |
| X020169 | FN3KRP   | IPI00099986.5  | 319  | 10  | 6  | 7   | 0.89 | 1.16 | 1.11 | 1.15 | 1.14 |
| X020169 | FRG1     | IPI00004655.1  | 272  | 6   | 5  | 6   | 0.97 | 1.23 | 1.09 | 1.00 | 1.12 |
| X020169 | FSCN1    | IPI00747810.2  | 229  | 9   | 6  | 6   | 1.32 | 0.92 | 0.94 | 0.92 | 0.77 |
| X020169 | FUBP1    | IPI00641948.2  | 206  | 6   | 4  | 4   | 1.23 | 0.80 | 0.77 | 0.70 | 0.75 |
| X020169 | FUS      | IPI00260715.5  | 444  | 10  | 8  | 8   | 1.59 | 1.57 | 1.15 | 0.96 | 0.91 |
| X020169 | FXR1     | IPI00016249.4  | 222  | 7   | 3  | 3   | 1.05 | 1.18 | 1.00 | 0.89 | 0.89 |
| X020169 | G6PD     | IPI00216008.4  | 162  | 7   | 3  | 3   | 1.43 | 0.97 | 1.00 | 0.95 | 0.87 |
| X020169 | GALNT2   | IPI00004669.1  | 83   | 4   | 3  | 3   | 1.30 | 1.24 | 0.97 | 1.02 | 0.98 |
| X020169 | GANAB    | IPI00383581.4  | 209  | 9   | 2  | 3   | 1.16 | 0.68 | 0.81 | 0.80 | 0.82 |
| X020169 | GAR1     | IPI00872985.1  | 300  | 7   | 7  | 7   | 1.01 | 1.13 | 1.05 | 0.94 | 0.79 |
| X020169 | GARS     | IPI00783097.3  | 257  | 9   | 9  | 9   | 1.08 | 0.90 | 0.90 | 0.88 | 0.86 |
| X020169 | GART     | IPI00025273.1  | 4232 | 170 | 58 | 115 | 0.96 | 0.96 | 1.10 | 1.09 | 1.18 |
| X020169 | GCDH     | IPI00024317.1  | 793  | 22  | 14 | 15  | 0.90 | 1.00 | 0.97 | 0.98 | 1.00 |
| X020169 | GCN1L1   | IPI00001159.10 | 2633 | 66  | 47 | 48  | 0.90 | 0.88 | 0.85 | 0.86 | 0.96 |
| X020169 | GCS1     | IPI00328170.9  | 193  | 6   | 2  | 2   | 1.23 | 1.03 | 1.08 | 0.93 | 0.87 |
| X020169 | GEMIN4   | IPI00789740.1  | 157  | 6   | 2  | 2   | 0.86 | 0.72 | 0.96 | 0.98 | 0.82 |
| X020169 | GEMIN5   | IPI00291783.3  | 427  | 11  | 5  | 5   | 0.94 | 0.89 | 0.94 | 1.00 | 0.90 |
| X020169 | GFPT1    | IPI00217952.6  | 327  | 10  | 6  | 6   | 1.06 | 0.98 | 1.00 | 0.99 | 0.98 |
| X020169 | GGCT     | IPI00031564.1  | 245  | 4   | 4  | 4   | 0.93 | 0.91 | 0.85 | 0.92 | 0.71 |
| X020169 | GGH      | IPI00023728.1  | 71   | 3   | 2  | 2   | 1.01 | 0.92 | 0.78 | 0.92 | 0.78 |
| X020169 | GLOD4    | IPI00007102.3  | 500  | 14  | 8  | 8   | 0.90 | 1.06 | 1.01 | 1.03 | 1.07 |
| X020169 | GLRX     | IPI00219025.3  | 92   | 4   | 2  | 3   | 0.98 | 0.95 | 0.86 | 1.10 | 0.85 |
| X020169 | GLT25D1  | IPI00168262.2  | 376  | 14  | 8  | 8   | 1.12 | 1.00 | 1.06 | 1.06 | 0.98 |
| X020169 | GLUD1    | IPI00016801.1  | 329  | 7   | 4  | 4   | 1.31 | 0.84 | 0.86 | 0.72 | 0.82 |
| X020169 | GLUL     | IPI00010130.3  | 612  | 19  | 12 | 14  | 0.93 | 1.12 | 1.14 | 1.09 | 1.01 |
| X020169 | GM2A     | IPI00018236.2  | 112  | 3   | 3  | 3   | 1.07 | 0.99 | 0.86 | 1.06 | 0.86 |
| X020169 | GMPS     | IPI00029079.5  | 444  | 12  | 9  | 9   | 1.15 | 0.98 | 0.99 | 0.90 | 0.93 |
| X020169 | GNAS     | IPI00095891.2  | 220  | 5   | 4  | 4   | 1.03 | 1.03 | 0.95 | 0.98 | 0.93 |
| X020169 | GNB1     | IPI00026268.3  | 64   | 2   | 2  | 2   | 1.52 | 0.94 | 1.29 | 0.80 | 0.84 |
| X020169 | GNB1L    | IPI00107339.4  | 505  | 10  | 9  | 9   | 0.95 | 1.11 | 1.06 | 1.11 | 1.04 |
| X020169 | GNB2L1   | IPI00641950.4  | 672  | 14  | 13 | 14  | 1.17 | 0.96 | 1.00 | 0.93 | 0.90 |
| X020169 | GNL3     | IPI00306380.10 | 208  | 5   | 3  | 3   | 1.08 | 0.93 | 0.95 | 0.86 | 0.77 |

|         |          |               |     |    |    |    |      |      |      |      |      |
|---------|----------|---------------|-----|----|----|----|------|------|------|------|------|
| X020169 | GPATCH4  | IPI00829835.2 | 149 | 4  | 2  | 2  | 1.11 | 1.08 | 1.04 | 0.97 | 0.80 |
| X020169 | GPD2     | IPI00017895.2 | 249 | 5  | 5  | 5  | 0.98 | 1.15 | 1.06 | 0.99 | 0.96 |
| X020169 | GRB2     | IPI00021327.3 | 198 | 7  | 3  | 3  | 1.06 | 0.92 | 1.02 | 0.96 | 0.96 |
| X020169 | GRWD1    | IPI00027831.1 | 175 | 6  | 2  | 2  | 1.01 | 0.99 | 1.05 | 0.95 | 0.92 |
| X020169 | GSN      | IPI00026314.1 | 280 | 7  | 3  | 3  | 0.98 | 1.03 | 0.98 | 1.01 | 1.14 |
| X020169 | GSPT1    | IPI00910513.1 | 479 | 12 | 8  | 8  | 1.00 | 1.01 | 0.97 | 0.93 | 0.96 |
| X020169 | GSR      | IPI00016862.1 | 530 | 9  | 8  | 8  | 0.96 | 1.12 | 1.13 | 1.06 | 1.06 |
| X020169 | GSTM3    | IPI00246975.8 | 210 | 8  | 5  | 6  | 0.96 | 1.08 | 1.28 | 1.07 | 1.12 |
| X020169 | GTF2F1   | IPI00017450.2 | 456 | 10 | 4  | 4  | 0.99 | 1.04 | 1.06 | 0.92 | 0.88 |
| X020169 | GTF2F2   | IPI00876896.1 | 320 | 10 | 9  | 9  | 1.05 | 1.21 | 1.14 | 1.02 | 1.10 |
| X020169 | GTF2I    | IPI00054042.1 | 878 | 23 | 17 | 17 | 0.96 | 1.07 | 1.02 | 1.10 | 1.04 |
| X020169 | GTSF1    | IPI00795267.1 | 70  | 3  | 2  | 2  | 0.95 | 0.94 | 0.92 | 0.95 | 0.84 |
| X020169 | GUSB     | IPI00027745.4 | 341 | 12 | 9  | 9  | 1.03 | 1.08 | 0.99 | 1.13 | 1.03 |
| X020169 | H1F0     | IPI00550239.4 | 134 | 4  | 2  | 2  | 1.15 | 1.15 | 0.95 | 0.82 | 1.04 |
| X020169 | H1FX     | IPI00021924.1 | 129 | 4  | 3  | 3  | 1.60 | 0.88 | 0.89 | 0.90 | 0.82 |
| X020169 | HADHA    | IPI00031522.2 | 505 | 18 | 8  | 9  | 1.13 | 0.89 | 0.89 | 0.77 | 0.79 |
| X020169 | HADHB    | IPI00022793.5 | 233 | 6  | 3  | 3  | 1.40 | 0.91 | 1.01 | 0.87 | 0.80 |
| X020169 | HBA1     | IPI00410714.5 | 266 | 7  | 3  | 4  | 1.57 | 1.26 | 1.13 | 0.93 | 0.95 |
| X020169 | HBG1     | IPI00744503.1 | 454 | 11 | 8  | 11 | 1.15 | 1.11 | 1.05 | 1.01 | 1.05 |
| X020169 | HCFC1    | IPI00641743.2 | 157 | 5  | 2  | 2  | 0.77 | 0.77 | 0.67 | 1.14 | 0.75 |
| X020169 | HCG_2004 | IPI00478208.2 | 336 | 9  | 7  | 8  | 1.36 | 0.92 | 0.88 | 0.75 | 0.69 |
| X020169 | HCG_2107 | IPI00398135.2 | 102 | 5  | 4  | 4  | 1.40 | 0.90 | 0.95 | 0.79 | 0.84 |
| X020169 | HDAC1    | IPI00013774.1 | 106 | 3  | 2  | 2  | 1.10 | 1.06 | 1.06 | 1.07 | 0.97 |
| X020169 | HDAC10   | IPI00012439.5 | 262 | 8  | 5  | 5  | 1.53 | 1.74 | 1.30 | 1.65 | 1.28 |
| X020169 | HDAC6    | IPI00005711.4 | 376 | 8  | 7  | 7  | 1.08 | 1.15 | 1.13 | 1.18 | 1.16 |
| X020169 | HDGF     | IPI00514127.1 | 439 | 12 | 8  | 9  | 1.17 | 1.09 | 1.02 | 0.98 | 1.04 |
| X020169 | HDGF2    | IPI00013290.5 | 162 | 4  | 2  | 2  | 1.05 | 0.80 | 0.98 | 0.96 | 0.81 |
| X020169 | HDLBP    | IPI00022228.2 | 171 | 9  | 3  | 3  | 1.01 | 1.05 | 1.00 | 0.95 | 0.92 |
| X020169 | HEATR2   | IPI00242630.3 | 76  | 2  | 2  | 2  | 1.00 | 0.82 | 0.84 | 0.91 | 0.79 |
| X020169 | HEXB     | IPI00012585.1 | 129 | 5  | 3  | 3  | 1.03 | 0.99 | 0.96 | 1.03 | 0.99 |
| X020169 | HINT1    | IPI00239077.5 | 80  | 4  | 2  | 2  | 1.32 | 1.25 | 1.19 | 1.46 | 1.13 |
| X020169 | HIST1H1B | IPI00217468.3 | 436 | 10 | 4  | 4  | 1.17 | 0.92 | 0.78 | 0.74 | 0.90 |
| X020169 | HIST1H1C | IPI00217467.3 | 482 | 12 | 10 | 10 | 1.93 | 0.93 | 0.91 | 0.77 | 0.87 |
| X020169 | HMGB1    | IPI00419258.4 | 353 | 17 | 5  | 6  | 1.62 | 1.27 | 1.29 | 1.00 | 1.05 |
| X020169 | HMGCL    | IPI00293564.5 | 133 | 4  | 2  | 2  | 0.93 | 0.98 | 0.87 | 0.96 | 0.82 |
| X020169 | HMGN1    | IPI00658097.1 | 110 | 2  | 2  | 2  | 1.61 | 1.25 | 0.91 | 0.92 | 0.86 |
| X020169 | HNRNPA0  | IPI00011913.1 | 110 | 4  | 2  | 2  | 1.60 | 0.87 | 0.89 | 0.75 | 0.78 |
| X020169 | HNRNPF   | IPI00003881.5 | 656 | 16 | 10 | 10 | 1.29 | 0.94 | 0.95 | 0.90 | 0.90 |
| X020169 | HNRNPH1  | IPI00479191.2 | 694 | 14 | 6  | 7  | 1.14 | 0.91 | 0.92 | 0.90 | 0.89 |
| X020169 | HNRNPH2  | IPI00917181.1 | 87  | 3  | 2  | 2  | 1.85 | 0.89 | 0.89 | 0.79 | 0.73 |

|         |          |               |      |    |    |    |      |      |      |      |      |
|---------|----------|---------------|------|----|----|----|------|------|------|------|------|
| X020169 | HNRNPH2  | IPI00026230.1 | 109  | 4  | 2  | 2  | 1.13 | 1.00 | 0.97 | 0.96 | 0.97 |
| X020169 | HNRNPK   | IPI00216746.1 | 728  | 23 | 15 | 19 | 1.39 | 0.87 | 0.86 | 0.74 | 0.76 |
| X020169 | HNRNPL   | IPI00027834.3 | 512  | 15 | 7  | 7  | 1.58 | 0.80 | 0.78 | 0.73 | 0.67 |
| X020169 | HNRNPM   | IPI00171903.2 | 935  | 39 | 20 | 22 | 1.25 | 0.79 | 0.83 | 0.67 | 0.71 |
| X020169 | HNRNPR   | IPI00644055.3 | 329  | 8  | 5  | 5  | 1.43 | 0.83 | 0.81 | 0.69 | 0.69 |
| X020169 | HNRNPU   | IPI00644079.2 | 933  | 32 | 18 | 19 | 1.23 | 0.95 | 0.88 | 0.80 | 0.80 |
| X020169 | HNRNPUL  | IPI00013070.2 | 515  | 15 | 14 | 14 | 1.00 | 0.96 | 1.05 | 0.96 | 0.98 |
| X020169 | HNRPDL   | IPI00011274.3 | 262  | 7  | 4  | 4  | 1.36 | 0.69 | 0.83 | 0.73 | 0.68 |
| X020169 | HNRPLL   | IPI00103247.1 | 202  | 7  | 4  | 4  | 1.10 | 0.96 | 1.00 | 0.98 | 0.89 |
| X020169 | HPR      | IPI00641737.1 | 91   | 3  | 2  | 2  | 1.86 | 1.46 | 1.09 | 1.12 | 1.41 |
| X020169 | HPRT1    | IPI00873466.1 | 315  | 7  | 5  | 5  | 0.99 | 0.98 | 1.00 | 1.06 | 0.95 |
| X020169 | HSD11B2  | IPI00300050.3 | 266  | 6  | 6  | 6  | 0.92 | 1.15 | 1.02 | 0.93 | 0.93 |
| X020169 | HSD17B1  | IPI00902797.1 | 71   | 3  | 2  | 2  | 1.05 | 1.02 | 1.24 | 0.98 | 1.01 |
| X020169 | HSD17B10 | IPI00017726.1 | 599  | 12 | 8  | 9  | 1.46 | 1.04 | 1.00 | 0.95 | 0.98 |
| X020169 | HSD17B12 | IPI00007676.3 | 264  | 7  | 4  | 5  | 1.20 | 1.16 | 1.12 | 0.99 | 1.02 |
| X020169 | HSD17B4  | IPI00909582.1 | 1327 | 30 | 25 | 25 | 1.05 | 1.23 | 1.02 | 0.87 | 0.98 |
| X020169 | HSDL2    | IPI00414384.1 | 330  | 7  | 4  | 4  | 1.13 | 1.07 | 1.08 | 1.01 | 1.00 |
| X020169 | HSP90AA1 | IPI00382470.3 | 802  | 19 | 10 | 11 | 1.19 | 0.89 | 0.93 | 0.67 | 0.86 |
| X020169 | HSP90AB1 | IPI00414676.6 | 1384 | 34 | 11 | 11 | 1.16 | 0.83 | 0.89 | 0.69 | 0.80 |
| X020169 | HSP90B1  | IPI00027230.3 | 685  | 19 | 10 | 10 | 1.70 | 0.84 | 1.04 | 0.68 | 0.85 |
| X020169 | HSPA1A   | IPI00304925.5 | 1415 | 44 | 18 | 25 | 0.92 | 1.05 | 0.98 | 0.93 | 0.99 |
| X020169 | HSPA5    | IPI00003362.2 | 1274 | 30 | 19 | 22 | 1.27 | 1.05 | 1.19 | 0.91 | 0.96 |
| X020169 | HSPA8    | IPI00003865.1 | 1153 | 32 | 13 | 17 | 0.99 | 0.98 | 0.96 | 0.89 | 0.93 |
| X020169 | HSPA9    | IPI00007765.5 | 1596 | 35 | 23 | 25 | 1.14 | 0.97 | 0.94 | 0.85 | 0.89 |
| X020169 | HSPB1    | IPI00025512.2 | 329  | 6  | 6  | 6  | 1.32 | 0.88 | 0.75 | 0.70 | 0.76 |
| X020169 | HSPC152  | IPI00009010.3 | 172  | 6  | 2  | 3  | 1.11 | 1.21 | 1.24 | 1.10 | 1.15 |
| X020169 | HSPD1    | IPI00784154.1 | 1114 | 29 | 19 | 23 | 1.45 | 0.93 | 0.87 | 0.78 | 0.83 |
| X020169 | HTATSF1  | IPI00013788.1 | 680  | 25 | 15 | 15 | 1.02 | 1.03 | 1.08 | 1.17 | 1.20 |
| X020169 | HYOU1    | IPI00000877.1 | 201  | 8  | 4  | 4  | 1.85 | 0.87 | 1.04 | 0.88 | 1.01 |
| X020169 | IAH1     | IPI00419194.2 | 111  | 4  | 3  | 3  | 0.94 | 0.96 | 1.06 | 1.22 | 1.08 |
| X020169 | IARS     | IPI00644127.1 | 719  | 16 | 13 | 13 | 0.91 | 0.80 | 0.89 | 0.88 | 0.90 |
| X020169 | IDE      | IPI00220373.5 | 93   | 7  | 2  | 2  | 0.77 | 1.07 | 0.96 | 0.90 | 0.78 |
| X020169 | IDH3B    | IPI00304417.7 | 72   | 2  | 2  | 2  | 1.20 | 0.96 | 0.90 | 0.98 | 1.04 |
| X020169 | IGF2BP3  | IPI00658000.2 | 503  | 11 | 8  | 8  | 1.03 | 0.89 | 0.76 | 0.82 | 0.71 |
| X020169 | IK       | IPI00883647.1 | 180  | 4  | 3  | 3  | 1.07 | 1.15 | 1.17 | 1.09 | 1.16 |
| X020169 | ILF2     | IPI00872107.1 | 222  | 7  | 4  | 5  | 1.59 | 0.78 | 0.88 | 0.69 | 0.70 |
| X020169 | ILF3     | IPI00418313.3 | 666  | 14 | 8  | 8  | 1.32 | 0.81 | 0.86 | 0.70 | 0.75 |
| X020169 | IMPDH2   | IPI00291510.3 | 474  | 11 | 9  | 9  | 1.03 | 0.92 | 0.91 | 0.82 | 0.83 |
| X020169 | INPP5K   | IPI00374574.2 | 94   | 3  | 2  | 2  | 0.79 | 0.95 | 1.01 | 0.93 | 0.99 |
| X020169 | IPO4     | IPI00398009.2 | 178  | 6  | 5  | 5  | 1.11 | 0.96 | 1.05 | 0.98 | 0.86 |

|         |          |               |      |    |    |    |      |      |      |      |      |
|---------|----------|---------------|------|----|----|----|------|------|------|------|------|
| X020169 | IPO5     | IPI00793443.1 | 963  | 24 | 16 | 16 | 0.90 | 0.85 | 0.87 | 0.85 | 0.99 |
| X020169 | IPO7     | IPI00007402.3 | 292  | 6  | 2  | 2  | 0.86 | 0.82 | 0.79 | 0.68 | 0.89 |
| X020169 | IQGAP1   | IPI00009342.1 | 1600 | 33 | 18 | 19 | 0.95 | 1.03 | 1.03 | 0.96 | 1.04 |
| X020169 | IQGAP2   | IPI00299048.6 | 481  | 14 | 7  | 7  | 0.94 | 1.03 | 1.00 | 0.96 | 1.08 |
| X020169 | ISOC1    | IPI00304082.8 | 279  | 7  | 2  | 2  | 1.18 | 1.13 | 0.82 | 0.91 | 1.12 |
| X020169 | ISOC2    | IPI00003031.3 | 120  | 3  | 2  | 2  | 1.40 | 1.44 | 1.10 | 1.51 | 1.11 |
| X020169 | ISYNA1   | IPI00549569.4 | 185  | 6  | 5  | 5  | 0.99 | 1.01 | 0.87 | 0.84 | 0.93 |
| X020169 | ITPA     | IPI00018783.1 | 64   | 3  | 2  | 2  | 1.44 | 0.76 | 1.08 | 1.08 | 0.96 |
| X020169 | JTV1     | IPI00011916.1 | 168  | 5  | 3  | 3  | 1.16 | 0.86 | 0.87 | 0.86 | 0.81 |
| X020169 | KARS     | IPI00307092.2 | 391  | 12 | 9  | 9  | 1.17 | 0.79 | 0.83 | 0.88 | 0.78 |
| X020169 | KCTD12   | IPI00060715.1 | 90   | 3  | 2  | 2  | 1.11 | 1.04 | 1.01 | 1.11 | 0.99 |
| X020169 | KCTD7    | IPI00878627.1 | 166  | 4  | 2  | 2  | 0.96 | 0.93 | 0.88 | 1.22 | 1.04 |
| X020169 | KHDRBS1  | IPI00008575.3 | 166  | 9  | 6  | 6  | 1.31 | 1.23 | 0.96 | 0.89 | 0.83 |
| X020169 | KHSRP    | IPI00479786.5 | 848  | 25 | 13 | 14 | 1.08 | 1.05 | 1.00 | 0.99 | 1.04 |
| X020169 | KIAA0368 | IPI00157790.7 | 79   | 4  | 2  | 2  | 1.25 | 1.01 | 1.02 | 0.92 | 1.14 |
| X020169 | KIAA0664 | IPI00024425.5 | 788  | 22 | 18 | 18 | 1.08 | 1.02 | 1.05 | 1.18 | 1.16 |
| X020169 | KIAA0776 | IPI00844000.1 | 157  | 5  | 2  | 2  | 1.23 | 1.21 | 1.20 | 1.29 | 1.02 |
| X020169 | KIF2A    | IPI00848334.1 | 400  | 13 | 8  | 8  | 1.11 | 1.09 | 1.06 | 0.99 | 0.99 |
| X020169 | KIF2C    | IPI00290435.3 | 333  | 10 | 5  | 5  | 1.01 | 1.02 | 1.02 | 0.97 | 0.90 |
| X020169 | KIF5B    | IPI00012837.1 | 171  | 8  | 4  | 4  | 1.00 | 1.01 | 1.03 | 1.08 | 0.93 |
| X020169 | KLHL23   | IPI00062213.4 | 144  | 3  | 2  | 2  | 0.90 | 1.00 | 1.02 | 1.06 | 0.94 |
| X020169 | KNG1     | IPI00032328.2 | 267  | 7  | 3  | 3  | 1.21 | 1.07 | 1.12 | 1.13 | 1.02 |
| X020169 | KPNA1    | IPI00303292.1 | 98   | 3  | 2  | 2  | 0.98 | 1.12 | 0.97 | 1.04 | 0.91 |
| X020169 | KPNA2    | IPI00002214.1 | 347  | 7  | 4  | 4  | 0.93 | 0.93 | 0.88 | 0.79 | 0.78 |
| X020169 | KPNB1    | IPI00001639.2 | 203  | 5  | 3  | 4  | 1.04 | 0.74 | 0.77 | 0.90 | 0.83 |
| X020169 | LANCL2   | IPI00032995.1 | 321  | 8  | 2  | 2  | 0.91 | 1.04 | 1.06 | 0.94 | 1.06 |
| X020169 | LANCL3   | IPI00643639.2 | 112  | 3  | 2  | 2  | 0.88 | 1.08 | 1.13 | 0.96 | 1.04 |
| X020169 | LARP1    | IPI00185919.3 | 215  | 8  | 6  | 6  | 1.00 | 1.00 | 0.97 | 0.94 | 0.90 |
| X020169 | LARS     | IPI00103994.4 | 715  | 20 | 10 | 10 | 0.85 | 0.78 | 0.83 | 0.86 | 0.85 |
| X020169 | LASP1    | IPI00386803.4 | 109  | 5  | 2  | 2  | 1.10 | 0.88 | 0.68 | 0.90 | 0.71 |
| X020169 | LCP1     | IPI00010471.5 | 561  | 14 | 7  | 7  | 1.04 | 0.82 | 0.87 | 0.81 | 0.84 |
| X020169 | LDHB     | IPI00219217.3 | 495  | 11 | 7  | 8  | 1.86 | 0.75 | 0.87 | 0.71 | 0.70 |
| X020169 | LETM1    | IPI00017592.1 | 133  | 6  | 3  | 3  | 1.33 | 1.05 | 1.04 | 0.91 | 0.98 |
| X020169 | LGALS1   | IPI00219219.3 | 122  | 3  | 2  | 2  | 1.43 | 0.84 | 0.92 | 0.78 | 0.82 |
| X020169 | LGALS3BF | IPI00023673.1 | 532  | 12 | 10 | 11 | 0.94 | 1.03 | 1.08 | 1.07 | 1.09 |
| X020169 | LIG3     | IPI00029081.3 | 199  | 7  | 3  | 3  | 1.09 | 1.06 | 0.95 | 0.99 | 0.85 |
| X020169 | LIN28B   | IPI00873862.1 | 214  | 5  | 5  | 5  | 0.97 | 1.03 | 1.00 | 1.00 | 1.06 |
| X020169 | LOC10012 | IPI00887111.1 | 126  | 4  | 2  | 2  | 1.66 | 1.40 | 0.94 | 0.80 | 0.91 |
| X020169 | LOC10012 | IPI00888660.1 | 113  | 3  | 2  | 2  | 1.45 | 0.77 | 0.83 | 0.80 | 0.78 |
| X020169 | LOC10013 | IPI00013296.3 | 271  | 9  | 5  | 5  | 1.71 | 0.90 | 0.97 | 0.73 | 0.71 |

|         |          |                |      |    |    |    |      |      |      |      |      |
|---------|----------|----------------|------|----|----|----|------|------|------|------|------|
| X020169 | LOC10013 | IPI00888474.1  | 500  | 11 | 9  | 9  | 1.16 | 0.89 | 0.78 | 0.71 | 0.79 |
| X020169 | LOC10013 | IPI00745343.2  | 140  | 6  | 3  | 5  | 1.17 | 1.13 | 1.03 | 1.03 | 1.00 |
| X020169 | LOC28488 | IPI00293276.10 | 137  | 10 | 3  | 4  | 0.94 | 1.17 | 1.03 | 1.09 | 0.94 |
| X020169 | LOC38847 | IPI00397676.4  | 379  | 8  | 7  | 7  | 1.20 | 0.87 | 0.77 | 0.74 | 0.77 |
| X020169 | LOC44249 | IPI00554481.1  | 234  | 8  | 4  | 4  | 1.58 | 0.87 | 0.86 | 0.74 | 0.78 |
| X020169 | LOC65078 | IPI00887241.1  | 118  | 3  | 2  | 3  | 0.99 | 0.95 | 0.95 | 0.93 | 0.91 |
| X020169 | LOC65418 | IPI00887678.1  | 465  | 12 | 6  | 9  | 1.65 | 0.93 | 0.90 | 0.87 | 0.83 |
| X020169 | LOC72865 | IPI00398964.2  | 230  | 10 | 8  | 8  | 1.52 | 0.89 | 0.93 | 0.92 | 0.79 |
| X020169 | LRPAP1   | IPI00026848.3  | 131  | 4  | 4  | 4  | 0.93 | 1.08 | 0.94 | 0.87 | 0.94 |
| X020169 | LRPPRC   | IPI00783271.1  | 520  | 14 | 9  | 9  | 0.89 | 0.61 | 1.19 | 0.57 | 0.68 |
| X020169 | LRRC47   | IPI00170935.1  | 399  | 12 | 7  | 7  | 0.91 | 0.89 | 0.80 | 0.72 | 0.78 |
| X020169 | LRRC59   | IPI00396321.1  | 655  | 24 | 13 | 17 | 1.11 | 1.43 | 1.19 | 1.01 | 1.07 |
| X020169 | LSG1     | IPI00300094.6  | 85   | 3  | 2  | 2  | 1.01 | 1.31 | 1.21 | 1.04 | 1.16 |
| X020169 | LSM14A   | IPI00478300.2  | 320  | 9  | 6  | 6  | 1.01 | 1.38 | 1.10 | 1.01 | 1.02 |
| X020169 | LUC7L    | IPI00071318.1  | 381  | 10 | 8  | 9  | 0.94 | 1.10 | 1.06 | 1.08 | 1.05 |
| X020169 | LUC7L2   | IPI00006932.3  | 1075 | 38 | 15 | 24 | 0.92 | 0.96 | 0.89 | 0.92 | 0.89 |
| X020169 | LUZP6    | IPI00179589.4  | 220  | 5  | 4  | 4  | 1.27 | 1.09 | 0.99 | 1.01 | 1.05 |
| X020169 | LYAR     | IPI00015838.3  | 366  | 12 | 6  | 6  | 1.30 | 0.99 | 1.04 | 0.87 | 0.82 |
| X020169 | LYPLA2   | IPI00027032.1  | 149  | 3  | 2  | 3  | 0.89 | 1.06 | 1.01 | 1.06 | 1.08 |
| X020169 | M11S1    | IPI00783872.2  | 107  | 4  | 2  | 2  | 0.83 | 1.10 | 0.92 | 0.86 | 0.80 |
| X020169 | MAGI1    | IPI00470759.1  | 343  | 9  | 6  | 6  | 0.98 | 1.04 | 0.97 | 1.03 | 1.01 |
| X020169 | MAGMAS   | IPI00218463.3  | 122  | 4  | 4  | 4  | 1.36 | 1.35 | 1.06 | 0.96 | 0.93 |
| X020169 | MAP1B    | IPI00008868.3  | 249  | 9  | 3  | 3  | 1.09 | 1.05 | 0.87 | 0.93 | 0.91 |
| X020169 | MAP4     | IPI00396171.3  | 642  | 19 | 12 | 12 | 1.04 | 0.89 | 0.86 | 0.81 | 0.81 |
| X020169 | MAP4K4   | IPI00604647.1  | 109  | 6  | 2  | 2  | 1.02 | 1.03 | 1.28 | 0.90 | 1.34 |
| X020169 | MAPK1    | IPI00003479.3  | 278  | 9  | 6  | 6  | 1.24 | 0.92 | 1.03 | 0.93 | 1.51 |
| X020169 | MAPK14   | IPI00221141.3  | 92   | 3  | 2  | 2  | 0.77 | 0.99 | 0.91 | 1.01 | 1.47 |
| X020169 | MAPRE1   | IPI00017596.3  | 172  | 5  | 3  | 3  | 1.26 | 0.95 | 0.99 | 0.92 | 0.94 |
| X020169 | MARCKS   | IPI00219301.7  | 400  | 5  | 3  | 3  | 0.96 | 0.99 | 1.07 | 0.92 | 1.09 |
| X020169 | MARS     | IPI00008240.2  | 458  | 11 | 9  | 9  | 0.86 | 0.83 | 0.85 | 0.78 | 0.85 |
| X020169 | MAT2A    | IPI00010157.1  | 384  | 10 | 10 | 10 | 0.96 | 1.02 | 1.01 | 1.02 | 0.96 |
| X020169 | MAT2B    | IPI00002324.6  | 155  | 5  | 3  | 3  | 0.98 | 1.03 | 1.05 | 0.98 | 0.92 |
| X020169 | MATR3    | IPI00789551.1  | 387  | 12 | 9  | 10 | 1.13 | 0.86 | 0.89 | 0.84 | 0.83 |
| X020169 | MAZ      | IPI00008800.3  | 84   | 3  | 3  | 3  | 1.30 | 1.34 | 1.10 | 1.10 | 0.97 |
| X020169 | MBD3     | IPI00439194.1  | 108  | 3  | 2  | 2  | 1.15 | 0.99 | 0.92 | 0.83 | 0.90 |
| X020169 | MBNL1    | IPI00021692.2  | 67   | 2  | 2  | 2  | 1.60 | 0.72 | 0.85 | 0.66 | 0.71 |
| X020169 | MCCC1    | IPI00024580.4  | 372  | 7  | 5  | 5  | 0.95 | 1.10 | 1.08 | 1.18 | 1.10 |
| X020169 | MCCC2    | IPI00784044.1  | 570  | 14 | 10 | 11 | 0.91 | 0.95 | 0.97 | 0.99 | 0.95 |
| X020169 | MCM2     | IPI00184330.5  | 175  | 5  | 3  | 3  | 1.43 | 0.69 | 0.85 | 0.77 | 0.86 |
| X020169 | MCM3     | IPI00013214.2  | 761  | 17 | 11 | 11 | 1.01 | 0.86 | 0.97 | 0.89 | 0.94 |



|         |            |               |      |    |    |    |      |      |      |      |      |
|---------|------------|---------------|------|----|----|----|------|------|------|------|------|
| X020169 | MCM4       | IPI00018349.5 | 235  | 7  | 5  | 5  | 1.18 | 0.82 | 0.91 | 0.79 | 0.86 |
| X020169 | MCM5       | IPI00018350.3 | 668  | 18 | 14 | 14 | 1.18 | 1.02 | 0.95 | 0.99 | 0.90 |
| X020169 | MCM6       | IPI00031517.1 | 379  | 13 | 5  | 6  | 1.14 | 0.82 | 0.85 | 0.76 | 0.80 |
| X020169 | MCM7       | IPI00299904.3 | 295  | 7  | 5  | 5  | 1.14 | 0.92 | 0.84 | 0.89 | 0.78 |
| X020169 | MESDC2     | IPI00399089.4 | 84   | 3  | 2  | 2  | 0.96 | 1.08 | 1.07 | 1.31 | 0.93 |
| X020169 | MEST       | IPI00298947.5 | 159  | 5  | 4  | 4  | 1.04 | 1.05 | 1.05 | 0.99 | 0.88 |
| X020169 | MFAP1      | IPI00022790.2 | 800  | 23 | 15 | 17 | 1.12 | 1.16 | 1.08 | 1.01 | 1.16 |
| X020169 | Mitsugumir | IPI00031697.1 | 103  | 4  | 3  | 3  | 1.42 | 1.07 | 0.99 | 0.92 | 0.87 |
| X020169 | MKRN1      | IPI00033350.3 | 129  | 2  | 2  | 2  | 0.99 | 1.11 | 0.97 | 1.13 | 1.10 |
| X020169 | MKRN2      | IPI00396406.6 | 790  | 26 | 17 | 21 | 0.98 | 1.08 | 1.04 | 1.10 | 1.09 |
| X020169 | MMAB       | IPI00029665.8 | 60   | 3  | 2  | 2  | 1.19 | 0.99 | 1.19 | 1.36 | 1.01 |
| X020169 | MORF4L1    | IPI00409675.1 | 231  | 6  | 2  | 2  | 1.23 | 1.32 | 1.03 | 0.93 | 1.09 |
| X020169 | MOV10      | IPI00444452.3 | 274  | 9  | 7  | 7  | 1.18 | 0.91 | 0.99 | 0.94 | 0.95 |
| X020169 | MPP1       | IPI00215610.2 | 498  | 12 | 9  | 9  | 1.06 | 1.07 | 1.02 | 1.11 | 1.00 |
| X020169 | MRCL3      | IPI00604523.1 | 193  | 5  | 5  | 5  | 1.52 | 0.96 | 1.10 | 1.02 | 1.52 |
| X020169 | MRPL39     | IPI00084571.4 | 149  | 4  | 3  | 3  | 1.18 | 0.93 | 1.01 | 0.86 | 0.90 |
| X020169 | MRPS22     | IPI00013146.1 | 107  | 5  | 3  | 4  | 1.17 | 0.92 | 0.97 | 0.78 | 0.84 |
| X020169 | MRPS23     | IPI00032881.2 | 152  | 5  | 4  | 4  | 1.30 | 1.01 | 1.01 | 0.89 | 0.87 |
| X020169 | MRPS27     | IPI00022002.6 | 160  | 4  | 4  | 4  | 1.02 | 1.02 | 0.97 | 0.87 | 0.84 |
| X020169 | MRPS31     | IPI00294242.2 | 67   | 2  | 2  | 2  | 1.22 | 1.03 | 1.10 | 1.04 | 1.01 |
| X020169 | MRTO4      | IPI00106491.3 | 394  | 15 | 10 | 12 | 1.48 | 0.89 | 0.95 | 0.78 | 0.75 |
| X020169 | MSH2       | IPI00017303.1 | 164  | 8  | 2  | 2  | 0.91 | 0.94 | 0.90 | 0.93 | 0.97 |
| X020169 | MSH6       | IPI00384456.4 | 110  | 3  | 3  | 3  | 1.27 | 0.97 | 1.03 | 1.29 | 0.96 |
| X020169 | MSRB3      | IPI00479793.2 | 85   | 3  | 2  | 2  | 0.79 | 1.30 | 0.98 | 1.18 | 1.14 |
| X020169 | MTA2       | IPI00171798.1 | 420  | 18 | 12 | 12 | 1.14 | 1.08 | 1.00 | 0.97 | 1.14 |
| X020169 | MTDH       | IPI00328715.4 | 641  | 14 | 12 | 13 | 1.10 | 1.23 | 1.04 | 0.96 | 1.02 |
| X020169 | MTHFD1     | IPI00794900.1 | 788  | 22 | 11 | 11 | 0.98 | 0.93 | 0.97 | 0.95 | 0.94 |
| X020169 | MTHFD1L    | IPI00291646.2 | 438  | 10 | 6  | 6  | 1.00 | 0.89 | 1.04 | 0.99 | 1.03 |
| X020169 | mTOR       | IPI00031410.1 | 690  | 19 | 13 | 13 | 0.87 | 0.86 | 0.89 | 0.95 | 1.06 |
| X020169 | MTPAP      | IPI00470416.2 | 285  | 8  | 5  | 5  | 1.01 | 0.95 | 1.07 | 0.86 | 0.90 |
| X020169 | MUTED      | IPI00171438.2 | 95   | 4  | 2  | 2  | 1.26 | 0.84 | 0.89 | 0.71 | 1.52 |
| X020169 | MVD        | IPI00022745.1 | 76   | 2  | 2  | 2  | 1.22 | 0.90 | 1.05 | 0.83 | 0.77 |
| X020169 | MYBBP1A    | IPI00607584.1 | 293  | 10 | 6  | 6  | 0.95 | 1.27 | 1.10 | 1.09 | 1.06 |
| X020169 | MYD88      | IPI00001062.7 | 214  | 5  | 4  | 4  | 0.90 | 1.02 | 1.00 | 0.99 | 0.98 |
| X020169 | MYH9       | IPI00019502.3 | 2524 | 66 | 37 | 37 | 0.89 | 0.97 | 1.02 | 1.08 | 1.58 |
| X020169 | MYL4       | IPI00384992.7 | 176  | 5  | 3  | 3  | 1.00 | 0.87 | 0.85 | 0.87 | 1.11 |
| X020169 | MYL6       | IPI00789605.1 | 428  | 11 | 7  | 8  | 1.05 | 0.97 | 1.09 | 0.99 | 1.38 |
| X020169 | MYO1C      | IPI00743335.1 | 80   | 4  | 2  | 2  | 1.10 | 1.09 | 1.06 | 1.14 | 0.95 |
| X020169 | NACA       | IPI00797126.1 | 351  | 6  | 5  | 5  | 1.31 | 1.04 | 1.02 | 0.93 | 0.87 |
| X020169 | NAGK       | IPI00296526.6 | 176  | 6  | 4  | 4  | 0.83 | 0.93 | 0.92 | 0.97 | 0.92 |

|         |          |               |      |    |    |    |      |      |      |      |      |
|---------|----------|---------------|------|----|----|----|------|------|------|------|------|
| X020169 | NAP1L1   | IPI00023860.1 | 120  | 4  | 2  | 2  | 1.03 | 0.88 | 1.36 | 0.80 | 0.89 |
| X020169 | NARG1    | IPI00386189.2 | 224  | 9  | 6  | 6  | 1.21 | 0.95 | 0.96 | 0.87 | 0.92 |
| X020169 | NARS     | IPI00306960.3 | 203  | 8  | 4  | 4  | 1.06 | 0.79 | 0.79 | 0.74 | 0.74 |
| X020169 | NASP     | IPI00332499.1 | 331  | 9  | 5  | 5  | 1.76 | 0.92 | 1.09 | 0.87 | 0.85 |
| X020169 | NCBP1    | IPI00019380.1 | 286  | 7  | 4  | 4  | 0.93 | 0.99 | 0.96 | 0.96 | 1.00 |
| X020169 | NCBP2    | IPI00183500.2 | 80   | 4  | 2  | 2  | 1.27 | 0.97 | 0.98 | 1.13 | 0.82 |
| X020169 | NCKAP1   | IPI00409684.2 | 279  | 6  | 3  | 3  | 0.84 | 0.93 | 0.91 | 0.91 | 1.02 |
| X020169 | NCL      | IPI00604620.3 | 1154 | 37 | 24 | 25 | 1.19 | 1.06 | 1.35 | 0.87 | 0.94 |
| X020169 | NDUFA4   | IPI00011770.1 | 94   | 3  | 2  | 2  | 1.03 | 1.09 | 0.97 | 0.88 | 0.80 |
| X020169 | NDUFS3   | IPI00025796.3 | 177  | 4  | 2  | 2  | 1.46 | 0.77 | 0.83 | 0.66 | 0.82 |
| X020169 | NDUFV2   | IPI00646556.1 | 108  | 3  | 2  | 2  | 1.73 | 0.90 | 0.72 | 0.87 | 0.89 |
| X020169 | NEFM     | IPI00217507.5 | 129  | 5  | 3  | 3  | 0.91 | 0.92 | 0.98 | 0.84 | 1.12 |
| X020169 | NEK9     | IPI00301609.8 | 187  | 5  | 3  | 3  | 1.01 | 0.99 | 1.04 | 1.06 | 1.78 |
| X020169 | NFU1     | IPI00455153.2 | 151  | 4  | 3  | 3  | 0.92 | 1.06 | 1.03 | 1.02 | 1.05 |
| X020169 | NHP2     | IPI00041325.1 | 174  | 3  | 3  | 3  | 1.37 | 1.12 | 1.01 | 0.97 | 1.06 |
| X020169 | NME1-NM  | IPI00604590.3 | 290  | 11 | 6  | 7  | 1.40 | 0.88 | 0.83 | 0.79 | 0.74 |
| X020169 | NMT1     | IPI00329692.3 | 142  | 4  | 2  | 2  | 1.09 | 1.08 | 0.90 | 0.98 | 0.99 |
| X020169 | NOC4L    | IPI00031661.1 | 326  | 8  | 5  | 5  | 0.99 | 1.18 | 1.12 | 1.01 | 1.00 |
| X020169 | NOL7     | IPI00007729.1 | 153  | 4  | 3  | 3  | 1.17 | 1.12 | 1.01 | 0.95 | 0.85 |
| X020169 | NOLC1    | IPI00216654.2 | 730  | 27 | 17 | 17 | 0.95 | 1.01 | 1.03 | 0.88 | 0.94 |
| X020169 | NONO     | IPI00304596.3 | 983  | 39 | 19 | 26 | 1.17 | 1.57 | 0.98 | 0.93 | 0.84 |
| X020169 | NOP14    | IPI00022613.4 | 249  | 10 | 3  | 3  | 1.16 | 1.24 | 1.12 | 1.08 | 1.13 |
| X020169 | NOSIP    | IPI00006408.4 | 69   | 2  | 2  | 2  | 0.85 | 1.07 | 0.87 | 1.34 | 0.85 |
| X020169 | NP       | IPI00017672.4 | 140  | 4  | 2  | 2  | 1.04 | 0.94 | 0.84 | 1.02 | 0.91 |
| X020169 | NPM1     | IPI00549248.4 | 350  | 13 | 9  | 10 | 1.27 | 0.98 | 1.20 | 0.68 | 0.83 |
| X020169 | NRD1     | IPI00243221.2 | 144  | 5  | 3  | 3  | 1.10 | 1.03 | 1.26 | 1.23 | 1.11 |
| X020169 | NSUN2    | IPI00306369.3 | 160  | 6  | 3  | 3  | 1.12 | 0.98 | 1.04 | 1.00 | 1.10 |
| X020169 | NSUN5    | IPI00910694.1 | 81   | 2  | 2  | 2  | 1.27 | 1.24 | 1.05 | 0.90 | 0.84 |
| X020169 | NT5DC2   | IPI00783118.2 | 481  | 15 | 9  | 9  | 1.03 | 1.09 | 1.06 | 1.07 | 1.02 |
| X020169 | NUCKS1   | IPI00872944.1 | 215  | 7  | 5  | 5  | 1.21 | 1.16 | 1.19 | 1.10 | 0.86 |
| X020169 | NUDC     | IPI00550746.4 | 379  | 9  | 8  | 8  | 1.06 | 0.90 | 0.88 | 0.80 | 0.91 |
| X020169 | NUDT1    | IPI00004392.2 | 293  | 8  | 6  | 7  | 0.84 | 1.03 | 0.97 | 1.07 | 1.03 |
| X020169 | NUDT16L1 | IPI00031650.3 | 278  | 6  | 6  | 6  | 1.02 | 1.04 | 1.11 | 1.08 | 1.02 |
| X020169 | NUDT21   | IPI00646917.1 | 527  | 17 | 11 | 14 | 0.96 | 1.29 | 1.12 | 1.11 | 1.14 |
| X020169 | NUMB     | IPI00028059.1 | 98   | 4  | 2  | 2  | 1.26 | 1.01 | 1.01 | 0.86 | 0.82 |
| X020169 | NUP155   | IPI00026625.1 | 1436 | 33 | 23 | 24 | 0.90 | 0.93 | 1.00 | 1.04 | 1.10 |
| X020169 | OGT      | IPI00005780.3 | 69   | 4  | 2  | 2  | 1.22 | 1.06 | 0.94 | 1.00 | 1.07 |
| X020169 | OLA1     | IPI00916847.1 | 191  | 9  | 2  | 2  | 1.13 | 0.85 | 1.00 | 0.78 | 0.86 |
| X020169 | OLFM4    | IPI00022255.1 | 417  | 11 | 7  | 7  | 1.00 | 1.16 | 1.17 | 1.12 | 1.08 |
| X020169 | OPA1     | IPI00107753.2 | 1165 | 26 | 19 | 19 | 0.90 | 1.14 | 0.99 | 1.11 | 1.00 |

|         |         |               |      |    |    |    |      |      |      |      |      |
|---------|---------|---------------|------|----|----|----|------|------|------|------|------|
| X020169 | ORC5L   | IPI00015143.1 | 99   | 4  | 4  | 4  | 1.13 | 1.11 | 1.00 | 1.06 | 0.97 |
| X020169 | OTUB1   | IPI00000581.6 | 128  | 3  | 2  | 2  | 1.13 | 1.06 | 0.87 | 1.06 | 0.93 |
| X020169 | P11     | IPI00795429.1 | 1180 | 56 | 19 | 29 | 0.88 | 1.08 | 1.10 | 1.09 | 1.10 |
| X020169 | P4HA1   | IPI00218682.1 | 167  | 6  | 4  | 4  | 1.11 | 1.16 | 1.11 | 1.01 | 1.09 |
| X020169 | P4HB    | IPI00010796.1 | 591  | 15 | 11 | 11 | 1.86 | 0.99 | 0.94 | 0.85 | 0.85 |
| X020169 | PABPC1  | IPI00008524.1 | 727  | 24 | 9  | 10 | 1.08 | 0.93 | 0.91 | 0.86 | 0.84 |
| X020169 | PABPC4  | IPI00642904.1 | 249  | 7  | 4  | 4  | 1.05 | 0.84 | 0.87 | 0.79 | 0.79 |
| X020169 | PAF1    | IPI00300333.4 | 354  | 9  | 5  | 5  | 0.99 | 1.12 | 1.06 | 1.01 | 1.09 |
| X020169 | PAICS   | IPI00217223.1 | 505  | 10 | 8  | 8  | 1.38 | 0.80 | 0.78 | 0.71 | 0.70 |
| X020169 | PARP1   | IPI00449049.5 | 2212 | 64 | 43 | 49 | 1.48 | 0.86 | 0.95 | 0.69 | 0.87 |
| X020169 | PARS2   | IPI00553006.1 | 304  | 8  | 5  | 5  | 0.96 | 1.10 | 1.05 | 1.05 | 0.92 |
| X020169 | PBXIP1  | IPI00332106.2 | 165  | 5  | 2  | 2  | 1.30 | 0.87 | 0.89 | 0.92 | 0.93 |
| X020169 | PC      | IPI00299402.1 | 2472 | 75 | 44 | 54 | 0.92 | 0.94 | 1.01 | 1.03 | 1.11 |
| X020169 | PCBD1   | IPI00218568.7 | 499  | 24 | 9  | 11 | 1.04 | 1.19 | 1.06 | 1.20 | 1.06 |
| X020169 | PCBD2   | IPI00329646.4 | 301  | 7  | 4  | 5  | 0.85 | 1.06 | 1.02 | 1.00 | 1.44 |
| X020169 | PCBP1   | IPI00016610.2 | 974  | 19 | 7  | 9  | 1.04 | 1.11 | 1.07 | 0.98 | 0.99 |
| X020169 | PCBP2   | IPI00796337.1 | 342  | 6  | 5  | 5  | 1.24 | 0.90 | 0.95 | 0.82 | 0.85 |
| X020169 | PCCA    | IPI00796978.3 | 2857 | 87 | 45 | 65 | 0.94 | 1.07 | 1.10 | 1.09 | 1.12 |
| X020169 | PCCB    | IPI00007247.4 | 1836 | 48 | 26 | 40 | 0.93 | 1.09 | 1.05 | 1.06 | 1.04 |
| X020169 | PCF11   | IPI00016387.4 | 274  | 12 | 2  | 2  | 0.94 | 0.97 | 1.01 | 1.14 | 1.14 |
| X020169 | PCID2   | IPI00100313.2 | 486  | 14 | 5  | 5  | 1.37 | 1.12 | 1.08 | 0.98 | 0.94 |
| X020169 | PCMT1   | IPI00828189.1 | 337  | 7  | 5  | 5  | 1.24 | 1.04 | 0.97 | 0.98 | 0.95 |
| X020169 | PDAP1   | IPI00013297.1 | 390  | 11 | 8  | 8  | 1.12 | 1.24 | 1.14 | 1.01 | 1.01 |
| X020169 | PDCD10  | IPI00298558.2 | 129  | 3  | 2  | 2  | 1.21 | 1.13 | 1.05 | 1.10 | 1.06 |
| X020169 | PDCD6   | IPI00025277.5 | 217  | 6  | 5  | 5  | 1.52 | 0.88 | 1.05 | 0.88 | 0.85 |
| X020169 | PDCD6IP | IPI00246058.9 | 141  | 5  | 3  | 3  | 0.91 | 0.89 | 0.83 | 0.80 | 0.86 |
| X020169 | PDE10A  | IPI00215786.3 | 1249 | 25 | 21 | 21 | 0.90 | 1.03 | 1.01 | 1.03 | 1.05 |
| X020169 | PDE12   | IPI00174390.3 | 267  | 7  | 3  | 3  | 0.98 | 0.91 | 0.97 | 0.84 | 0.94 |
| X020169 | PDHA1   | IPI00306301.2 | 123  | 5  | 3  | 3  | 1.25 | 0.94 | 0.92 | 0.80 | 0.81 |
| X020169 | PDHB    | IPI00003925.6 | 131  | 3  | 3  | 3  | 1.74 | 0.78 | 0.76 | 0.74 | 0.66 |
| X020169 | PDIA3   | IPI00025252.1 | 715  | 16 | 8  | 8  | 1.87 | 1.01 | 0.96 | 0.78 | 0.85 |
| X020169 | PDIA4   | IPI00009904.1 | 299  | 9  | 4  | 4  | 1.69 | 0.95 | 1.08 | 0.90 | 0.94 |
| X020169 | PDIA5   | IPI00031479.1 | 172  | 4  | 3  | 3  | 1.01 | 1.26 | 1.07 | 0.99 | 1.09 |
| X020169 | PDIA6   | IPI00299571.5 | 423  | 8  | 6  | 6  | 1.77 | 0.86 | 0.91 | 0.74 | 0.85 |
| X020169 | PDS5A   | IPI00854642.1 | 77   | 3  | 3  | 3  | 1.10 | 1.11 | 1.35 | 1.34 | 1.38 |
| X020169 | PDXK    | IPI00013004.1 | 596  | 15 | 10 | 11 | 0.76 | 0.96 | 0.97 | 0.93 | 1.23 |
| X020169 | PEF1    | IPI00018235.3 | 248  | 7  | 6  | 7  | 1.00 | 1.16 | 1.08 | 1.10 | 1.04 |
| X020169 | PELO    | IPI00106698.1 | 218  | 5  | 4  | 4  | 0.96 | 1.01 | 1.07 | 1.03 | 0.98 |
| X020169 | PEX11B  | IPI00021978.1 | 107  | 3  | 3  | 3  | 1.08 | 1.04 | 0.96 | 0.96 | 0.96 |
| X020169 | PFDN2   | IPI00006052.3 | 254  | 5  | 4  | 4  | 1.19 | 0.98 | 0.87 | 0.89 | 0.88 |

|         |         |               |      |    |    |    |      |      |      |      |      |
|---------|---------|---------------|------|----|----|----|------|------|------|------|------|
| X020169 | PFKL    | IPI00784216.2 | 351  | 8  | 3  | 3  | 1.05 | 0.85 | 0.95 | 0.95 | 0.84 |
| X020169 | PFKP    | IPI00009790.1 | 90   | 4  | 3  | 3  | 1.07 | 0.96 | 0.95 | 0.92 | 1.00 |
| X020169 | PGAM5   | IPI00788907.2 | 199  | 9  | 4  | 4  | 1.42 | 1.02 | 1.04 | 1.00 | 1.00 |
| X020169 | PGLS    | IPI00029997.1 | 275  | 6  | 6  | 6  | 0.99 | 1.02 | 0.94 | 0.99 | 0.96 |
| X020169 | PGM3    | IPI00030116.2 | 94   | 4  | 2  | 2  | 0.88 | 0.94 | 0.72 | 0.86 | 0.78 |
| X020169 | PHB2    | IPI00027252.6 | 701  | 18 | 16 | 16 | 1.23 | 0.85 | 0.82 | 0.66 | 0.78 |
| X020169 | PHF5A   | IPI00005511.1 | 292  | 7  | 6  | 6  | 1.04 | 1.21 | 1.15 | 1.13 | 1.07 |
| X020169 | PHF6    | IPI00552149.2 | 413  | 11 | 8  | 8  | 1.07 | 1.27 | 1.06 | 0.96 | 1.07 |
| X020169 | PHGDH   | IPI00011200.5 | 791  | 19 | 13 | 14 | 1.21 | 0.84 | 0.83 | 0.81 | 0.80 |
| X020169 | PI4K2B  | IPI00291068.3 | 320  | 11 | 6  | 6  | 0.95 | 1.09 | 0.97 | 1.05 | 1.01 |
| X020169 | PIN4    | IPI00006658.4 | 191  | 6  | 2  | 2  | 1.22 | 1.45 | 1.18 | 0.97 | 1.10 |
| X020169 | PKP3    | IPI00026952.1 | 79   | 2  | 2  | 2  | 0.91 | 0.90 | 0.94 | 0.83 | 0.82 |
| X020169 | PLG     | IPI00019580.1 | 1094 | 34 | 22 | 25 | 0.88 | 0.97 | 1.08 | 0.99 | 1.09 |
| X020169 | PLOD3   | IPI00030255.1 | 364  | 10 | 7  | 7  | 1.00 | 1.04 | 1.08 | 1.12 | 1.06 |
| X020169 | PM20D2  | IPI00217852.6 | 249  | 7  | 3  | 3  | 0.97 | 1.06 | 0.98 | 1.12 | 1.00 |
| X020169 | POF1B   | IPI00103242.5 | 109  | 5  | 3  | 3  | 0.85 | 1.35 | 0.83 | 1.02 | 0.85 |
| X020169 | POLDIP3 | IPI00440688.4 | 351  | 11 | 7  | 7  | 1.02 | 1.10 | 1.08 | 0.95 | 0.99 |
| X020169 | POLRMT  | IPI00298738.3 | 165  | 6  | 2  | 2  | 0.89 | 0.90 | 0.87 | 0.88 | 0.88 |
| X020169 | PPA1    | IPI00015018.1 | 152  | 5  | 2  | 2  | 1.11 | 0.85 | 0.85 | 0.77 | 0.85 |
| X020169 | PPAT    | IPI00029534.1 | 86   | 3  | 2  | 2  | 1.23 | 0.97 | 1.08 | 1.21 | 1.39 |
| X020169 | PPIB    | IPI00646304.4 | 663  | 23 | 14 | 17 | 1.25 | 1.38 | 1.06 | 0.95 | 1.07 |
| X020169 | PPIF    | IPI00026519.1 | 58   | 2  | 2  | 2  | 1.67 | 0.96 | 0.89 | 0.66 | 0.75 |
| X020169 | PPIL2   | IPI00217324.1 | 183  | 7  | 4  | 4  | 0.90 | 1.04 | 0.97 | 0.93 | 0.99 |
| X020169 | PPIL4   | IPI00642862.1 | 775  | 17 | 14 | 15 | 1.04 | 1.20 | 1.08 | 1.07 | 1.08 |
| X020169 | PPM1G   | IPI00006167.1 | 246  | 6  | 6  | 6  | 1.27 | 1.14 | 1.25 | 1.03 | 1.12 |
| X020169 | PPME1   | IPI00412157.4 | 114  | 4  | 2  | 2  | 1.49 | 1.06 | 1.14 | 0.99 | 0.94 |
| X020169 | PPP1CC  | IPI00218187.1 | 58   | 2  | 2  | 2  | 1.05 | 1.00 | 0.86 | 0.93 | 0.93 |
| X020169 | PPP2CA  | IPI00008380.1 | 383  | 8  | 7  | 7  | 0.82 | 0.88 | 0.89 | 0.91 | 0.93 |
| X020169 | PPP2R1A | IPI00554737.3 | 851  | 22 | 17 | 17 | 0.97 | 1.00 | 0.99 | 0.97 | 0.94 |
| X020169 | PPP2R2A | IPI00332511.5 | 375  | 9  | 4  | 4  | 0.92 | 0.96 | 0.89 | 0.91 | 0.93 |
| X020169 | PPP4C   | IPI00012833.1 | 253  | 7  | 3  | 3  | 0.72 | 0.92 | 0.91 | 0.85 | 0.86 |
| X020169 | PPT1    | IPI00002412.1 | 85   | 3  | 2  | 2  | 1.32 | 1.16 | 0.95 | 1.06 | 0.94 |
| X020169 | PRDX1   | IPI00000874.1 | 617  | 23 | 8  | 11 | 1.10 | 1.10 | 1.00 | 0.98 | 1.02 |
| X020169 | PRDX2   | IPI00027350.3 | 174  | 7  | 4  | 4  | 1.10 | 0.83 | 0.72 | 0.74 | 0.74 |
| X020169 | PRDX3   | IPI00024919.3 | 414  | 7  | 7  | 7  | 0.90 | 0.79 | 0.93 | 0.71 | 0.95 |
| X020169 | PRDX4   | IPI00011937.1 | 343  | 9  | 5  | 5  | 1.01 | 1.06 | 0.98 | 1.03 | 1.02 |
| X020169 | PRDX6   | IPI00220301.5 | 430  | 12 | 10 | 10 | 1.15 | 0.90 | 0.99 | 0.83 | 0.97 |
| X020169 | PRKACA  | IPI00396630.3 | 84   | 2  | 2  | 2  | 1.10 | 1.04 | 0.79 | 0.76 | 0.75 |
| X020169 | PRKAG1  | IPI00473047.2 | 230  | 5  | 2  | 2  | 1.14 | 0.97 | 0.83 | 0.87 | 1.43 |
| X020169 | PRKAR1A | IPI00021831.1 | 88   | 3  | 3  | 3  | 1.22 | 0.98 | 0.89 | 0.91 | 0.82 |

|         |         |               |      |     |    |    |      |      |      |      |      |
|---------|---------|---------------|------|-----|----|----|------|------|------|------|------|
| X020169 | PRKAR2A | IPI00219774.3 | 123  | 5   | 2  | 2  | 1.02 | 0.88 | 0.93 | 1.03 | 0.85 |
| X020169 | PRKDC   | IPI00296337.2 | 3932 | 105 | 72 | 73 | 0.94 | 0.88 | 0.87 | 0.85 | 0.97 |
| X020169 | PRMT1   | IPI00018522.4 | 830  | 17  | 12 | 13 | 0.98 | 1.04 | 1.10 | 1.05 | 1.05 |
| X020169 | PRMT5   | IPI00441473.3 | 348  | 11  | 9  | 9  | 1.12 | 1.03 | 0.99 | 0.94 | 0.93 |
| X020169 | PROSC   | IPI00016346.1 | 239  | 6   | 5  | 5  | 1.02 | 1.20 | 1.00 | 1.01 | 0.98 |
| X020169 | PRPF19  | IPI00004968.1 | 354  | 7   | 6  | 6  | 1.06 | 0.97 | 0.94 | 0.85 | 0.86 |
| X020169 | PRPF31  | IPI00292000.6 | 86   | 4   | 2  | 2  | 1.00 | 1.12 | 1.02 | 0.95 | 1.05 |
| X020169 | PRPF38A | IPI00171390.2 | 304  | 9   | 6  | 6  | 1.07 | 0.72 | 0.80 | 0.88 | 0.79 |
| X020169 | PRPF40A | IPI00337386.3 | 409  | 11  | 5  | 5  | 1.16 | 1.05 | 1.00 | 1.00 | 1.04 |
| X020169 | PRPF4B  | IPI00013721.2 | 298  | 7   | 4  | 5  | 0.92 | 0.96 | 0.94 | 0.96 | 0.98 |
| X020169 | PRPF6   | IPI00305068.5 | 1123 | 26  | 18 | 18 | 1.13 | 1.10 | 1.10 | 1.16 | 1.17 |
| X020169 | PRPF8   | IPI00007928.4 | 1983 | 60  | 45 | 45 | 1.12 | 1.09 | 1.13 | 1.12 | 1.22 |
| X020169 | PRPS1   | IPI00219616.7 | 132  | 4   | 4  | 4  | 1.30 | 1.13 | 1.04 | 0.94 | 0.89 |
| X020169 | PSMA1   | IPI00472442.4 | 348  | 8   | 6  | 6  | 1.27 | 0.78 | 0.77 | 0.75 | 0.69 |
| X020169 | PSMA3   | IPI00419249.5 | 94   | 3   | 3  | 3  | 1.32 | 0.78 | 0.79 | 0.70 | 0.67 |
| X020169 | PSMB7   | IPI00003217.3 | 120  | 3   | 3  | 3  | 1.43 | 0.87 | 0.84 | 0.66 | 0.68 |
| X020169 | PSMC1   | IPI00011126.6 | 208  | 7   | 3  | 3  | 1.23 | 0.84 | 0.99 | 0.93 | 0.85 |
| X020169 | PSMC2   | IPI00021435.3 | 306  | 8   | 3  | 3  | 1.33 | 0.74 | 0.89 | 0.67 | 0.70 |
| X020169 | PSMC5   | IPI00023919.4 | 224  | 8   | 2  | 2  | 1.08 | 0.80 | 0.73 | 0.76 | 0.73 |
| X020169 | PSMD13  | IPI00375380.4 | 132  | 4   | 2  | 2  | 1.35 | 0.77 | 0.83 | 0.75 | 0.67 |
| X020169 | PSMD2   | IPI00012268.3 | 141  | 5   | 2  | 2  | 1.28 | 0.70 | 0.94 | 0.69 | 0.77 |
| X020169 | PSMD3   | IPI00011603.2 | 456  | 10  | 4  | 4  | 1.31 | 0.76 | 0.77 | 0.69 | 0.72 |
| X020169 | PSMD6   | IPI00014151.3 | 77   | 3   | 2  | 2  | 1.23 | 0.89 | 0.99 | 1.37 | 0.88 |
| X020169 | PSMD9   | IPI00010860.1 | 71   | 2   | 2  | 2  | 1.19 | 1.10 | 1.10 | 0.97 | 1.04 |
| X020169 | PSME1   | IPI00748256.2 | 581  | 13  | 10 | 11 | 0.92 | 1.04 | 1.09 | 1.07 | 1.04 |
| X020169 | PSME2   | IPI00384051.6 | 154  | 6   | 2  | 2  | 0.93 | 1.03 | 0.96 | 0.99 | 0.91 |
| X020169 | PSME3   | IPI00219445.1 | 315  | 7   | 5  | 5  | 1.23 | 0.97 | 0.97 | 0.86 | 0.82 |
| X020169 | PSPC1   | IPI00103525.1 | 322  | 9   | 6  | 6  | 1.25 | 1.45 | 1.04 | 1.00 | 0.93 |
| X020169 | PTBP1   | IPI00183626.8 | 394  | 13  | 9  | 10 | 1.51 | 0.90 | 0.90 | 0.74 | 0.78 |
| X020169 | PTER    | IPI00100933.1 | 410  | 11  | 8  | 8  | 1.01 | 1.10 | 1.03 | 1.04 | 1.03 |
| X020169 | PTGES3  | IPI00789101.1 | 222  | 5   | 3  | 4  | 1.14 | 1.01 | 1.15 | 0.86 | 0.93 |
| X020169 | PTMA    | IPI00827535.1 | 112  | 2   | 2  | 2  | 1.43 | 1.02 | 2.85 | 0.88 | 1.11 |
| X020169 | PTPN1   | IPI00297261.3 | 128  | 3   | 2  | 2  | 1.14 | 0.97 | 1.00 | 1.01 | 0.85 |
| X020169 | PTRF    | IPI00176903.2 | 530  | 11  | 7  | 7  | 1.06 | 1.27 | 1.10 | 1.25 | 1.05 |
| X020169 | PTRH2   | IPI00555597.2 | 157  | 6   | 3  | 4  | 1.04 | 0.92 | 1.00 | 0.99 | 0.87 |
| X020169 | PUF60   | IPI00069750.2 | 1512 | 47  | 23 | 35 | 0.97 | 1.20 | 1.17 | 1.05 | 1.12 |
| X020169 | PURB    | IPI00045051.3 | 186  | 5   | 4  | 4  | 0.97 | 0.94 | 0.96 | 1.09 | 0.92 |
| X020169 | PUS1    | IPI00619930.2 | 119  | 3   | 3  | 3  | 1.16 | 0.99 | 0.91 | 1.11 | 0.89 |
| X020169 | PWP1    | IPI00014298.3 | 84   | 5   | 2  | 2  | 1.06 | 0.99 | 1.09 | 1.07 | 1.04 |
| X020169 | PYCR1   | IPI00550882.3 | 247  | 5   | 4  | 4  | 1.90 | 0.80 | 0.82 | 0.75 | 0.83 |

|         |          |               |     |    |    |    |      |      |      |      |      |
|---------|----------|---------------|-----|----|----|----|------|------|------|------|------|
| X020169 | PYCR2    | IPI00470610.4 | 112 | 5  | 3  | 3  | 1.42 | 0.89 | 1.01 | 1.01 | 0.84 |
| X020169 | PYGL     | IPI00783313.2 | 172 | 7  | 2  | 2  | 1.32 | 0.98 | 1.71 | 1.06 | 0.84 |
| X020169 | PZP      | IPI00025426.2 | 240 | 8  | 5  | 5  | 0.95 | 0.92 | 0.95 | 1.05 | 1.11 |
| X020169 | Q9UL88_H | IPI00783024.1 | 176 | 3  | 2  | 2  | 0.96 | 1.12 | 1.09 | 1.07 | 1.09 |
| X020169 | QARS     | IPI00026665.2 | 341 | 10 | 5  | 5  | 1.01 | 0.92 | 0.96 | 1.07 | 0.84 |
| X020169 | RAB14    | IPI00291928.8 | 227 | 5  | 5  | 5  | 1.19 | 1.01 | 0.95 | 0.92 | 0.91 |
| X020169 | RAB5C    | IPI00016339.4 | 94  | 2  | 2  | 2  | 1.85 | 0.97 | 0.85 | 0.73 | 0.81 |
| X020169 | RABGGTB  | IPI00295849.3 | 202 | 5  | 4  | 4  | 0.97 | 1.10 | 1.07 | 1.11 | 1.09 |
| X020169 | RALB     | IPI00444204.1 | 59  | 2  | 2  | 2  | 1.33 | 1.05 | 0.88 | 0.88 | 0.78 |
| X020169 | RAN      | IPI00792352.1 | 322 | 8  | 7  | 7  | 1.80 | 0.89 | 0.83 | 0.75 | 0.75 |
| X020169 | RANGAP1  | IPI00294879.1 | 133 | 3  | 3  | 3  | 1.07 | 0.98 | 1.05 | 1.02 | 0.96 |
| X020169 | RARS     | IPI00004860.2 | 424 | 12 | 11 | 11 | 0.93 | 0.95 | 0.90 | 0.92 | 0.89 |
| X020169 | RBBP4    | IPI00328319.8 | 431 | 10 | 3  | 3  | 1.13 | 1.01 | 0.97 | 0.89 | 0.95 |
| X020169 | RBBP7    | IPI00646512.1 | 116 | 3  | 3  | 3  | 1.11 | 1.00 | 0.94 | 0.91 | 0.93 |
| X020169 | RBM14    | IPI00013174.2 | 73  | 3  | 2  | 2  | 1.14 | 1.24 | 1.07 | 0.91 | 1.01 |
| X020169 | RBM15    | IPI00102752.2 | 59  | 4  | 2  | 2  | 0.98 | 1.16 | 0.95 | 0.96 | 0.97 |
| X020169 | RBM17    | IPI00176706.1 | 462 | 14 | 7  | 7  | 0.98 | 1.24 | 1.11 | 1.04 | 1.11 |
| X020169 | RBM25    | IPI00004273.6 | 720 | 26 | 13 | 14 | 1.06 | 1.06 | 1.07 | 0.95 | 1.06 |
| X020169 | RBM26    | IPI00166555.3 | 432 | 16 | 6  | 6  | 0.81 | 0.98 | 0.94 | 0.90 | 0.90 |
| X020169 | RBM27    | IPI00292975.4 | 169 | 5  | 3  | 3  | 1.05 | 1.15 | 1.12 | 1.08 | 1.00 |
| X020169 | RBM39    | IPI00163505.2 | 996 | 25 | 15 | 18 | 0.99 | 1.02 | 1.02 | 1.03 | 1.02 |
| X020169 | RBM8A    | IPI00001757.1 | 119 | 4  | 3  | 3  | 1.29 | 0.96 | 0.92 | 0.90 | 0.89 |
| X020169 | RCC2     | IPI00465044.2 | 871 | 23 | 16 | 16 | 1.09 | 1.09 | 1.12 | 0.94 | 0.96 |
| X020169 | RDBP     | IPI00000858.2 | 144 | 4  | 2  | 2  | 1.09 | 1.25 | 1.12 | 1.11 | 0.98 |
| X020169 | RER1     | IPI00005728.2 | 74  | 3  | 2  | 2  | 1.08 | 0.85 | 0.89 | 0.78 | 0.74 |
| X020169 | RFC1     | IPI00375358.2 | 358 | 13 | 5  | 5  | 1.08 | 1.04 | 1.07 | 0.94 | 0.91 |
| X020169 | RFC2     | IPI00017412.1 | 384 | 9  | 8  | 8  | 1.14 | 1.09 | 1.07 | 1.00 | 1.03 |
| X020169 | RFC3     | IPI00031521.1 | 338 | 6  | 6  | 6  | 0.97 | 1.08 | 1.01 | 0.94 | 0.93 |
| X020169 | RFC4     | IPI00017381.1 | 351 | 9  | 7  | 7  | 1.09 | 1.10 | 0.99 | 0.92 | 0.97 |
| X020169 | RFC5     | IPI00031514.1 | 406 | 14 | 10 | 10 | 1.04 | 1.09 | 1.03 | 0.94 | 0.99 |
| X020169 | RFT1     | IPI00059368.2 | 178 | 6  | 5  | 5  | 0.92 | 0.88 | 0.77 | 0.91 | 0.78 |
| X020169 | RIF1     | IPI00293845.5 | 228 | 10 | 5  | 5  | 1.42 | 1.00 | 1.02 | 0.96 | 0.96 |
| X020169 | RIOK1    | IPI00171336.3 | 84  | 3  | 2  | 2  | 0.99 | 1.02 | 0.91 | 0.98 | 0.98 |
| X020169 | RNPEP    | IPI00642211.3 | 121 | 4  | 3  | 3  | 1.08 | 0.86 | 0.98 | 1.02 | 1.06 |
| X020169 | RPAP3    | IPI00002408.4 | 162 | 4  | 2  | 2  | 1.00 | 0.87 | 0.94 | 0.90 | 0.93 |
| X020169 | RPIA     | IPI00026513.6 | 84  | 3  | 2  | 2  | 0.98 | 1.00 | 1.09 | 1.06 | 0.92 |
| X020169 | RPL10A   | IPI00827508.2 | 532 | 15 | 8  | 10 | 1.49 | 0.90 | 0.98 | 0.81 | 0.82 |
| X020169 | RPL11    | IPI00376798.3 | 263 | 6  | 3  | 3  | 1.20 | 0.98 | 1.00 | 0.85 | 0.92 |
| X020169 | RPL12    | IPI00024933.3 | 604 | 11 | 9  | 9  | 1.42 | 0.87 | 0.92 | 0.83 | 0.83 |
| X020169 | RPL13    | IPI00465361.4 | 237 | 9  | 5  | 5  | 1.46 | 0.95 | 0.94 | 0.94 | 0.96 |

|         |           |               |     |    |    |    |      |      |      |      |      |
|---------|-----------|---------------|-----|----|----|----|------|------|------|------|------|
| X020169 | RPL14     | IPI00555744.6 | 236 | 9  | 4  | 4  | 1.82 | 0.88 | 0.84 | 0.75 | 0.72 |
| X020169 | RPL15     | IPI00550032.1 | 91  | 3  | 2  | 2  | 1.52 | 0.90 | 0.89 | 0.93 | 0.89 |
| X020169 | RPL18     | IPI00215719.6 | 331 | 7  | 6  | 6  | 1.02 | 0.98 | 0.81 | 0.79 | 0.81 |
| X020169 | RPL18A    | IPI00472864.2 | 198 | 7  | 4  | 4  | 2.07 | 0.74 | 0.78 | 0.89 | 0.82 |
| X020169 | RPL22     | IPI00219153.4 | 349 | 7  | 6  | 6  | 1.40 | 1.10 | 1.07 | 0.94 | 0.96 |
| X020169 | RPL23     | IPI00010153.5 | 163 | 6  | 3  | 3  | 1.58 | 0.95 | 1.00 | 0.71 | 0.73 |
| X020169 | RPL23A    | IPI00789159.1 | 219 | 5  | 4  | 4  | 1.24 | 0.95 | 0.86 | 0.74 | 0.81 |
| X020169 | RPL24     | IPI00873403.1 | 236 | 6  | 5  | 5  | 1.76 | 0.85 | 0.81 | 0.80 | 0.71 |
| X020169 | RPL26     | IPI00433834.2 | 107 | 5  | 3  | 3  | 1.95 | 0.84 | 0.84 | 0.78 | 0.73 |
| X020169 | RPL3      | IPI00550021.4 | 277 | 11 | 6  | 6  | 1.74 | 0.83 | 0.83 | 0.76 | 0.75 |
| X020169 | RPL30     | IPI00219156.7 | 279 | 6  | 5  | 6  | 1.15 | 0.95 | 0.93 | 0.86 | 0.92 |
| X020169 | RPL31     | IPI00917298.1 | 119 | 6  | 2  | 2  | 2.06 | 0.87 | 0.82 | 0.94 | 0.79 |
| X020169 | RPL35A    | IPI00029731.8 | 194 | 7  | 5  | 5  | 1.78 | 0.84 | 0.91 | 0.73 | 0.74 |
| X020169 | RPL38     | IPI00215790.6 | 152 | 6  | 3  | 4  | 1.03 | 0.96 | 0.85 | 0.69 | 0.90 |
| X020169 | RPL4      | IPI00003918.6 | 559 | 20 | 8  | 9  | 1.35 | 0.79 | 0.82 | 0.78 | 0.78 |
| X020169 | RPL5      | IPI00000494.6 | 208 | 8  | 3  | 3  | 1.51 | 0.88 | 0.89 | 0.71 | 0.74 |
| X020169 | RPL6      | IPI00790342.1 | 319 | 11 | 8  | 8  | 1.21 | 0.91 | 0.80 | 0.66 | 0.74 |
| X020169 | RPL7      | IPI00872387.1 | 368 | 9  | 9  | 9  | 1.43 | 0.81 | 0.86 | 0.75 | 0.81 |
| X020169 | RPL8      | IPI00797230.1 | 205 | 9  | 5  | 5  | 1.87 | 0.90 | 0.87 | 0.82 | 0.87 |
| X020169 | RPLP0-LIK | IPI00871646.1 | 595 | 15 | 13 | 15 | 1.23 | 0.84 | 0.91 | 0.83 | 0.82 |
| X020169 | RPLP2     | IPI00008529.1 | 210 | 3  | 3  | 3  | 1.12 | 0.72 | 0.78 | 0.76 | 0.78 |
| X020169 | RPS10     | IPI00478810.1 | 459 | 19 | 10 | 12 | 1.32 | 1.04 | 1.00 | 1.01 | 0.88 |
| X020169 | RPS11     | IPI00025091.3 | 282 | 10 | 7  | 7  | 1.86 | 0.87 | 0.93 | 0.65 | 0.73 |
| X020169 | RPS12     | IPI00847579.1 | 272 | 7  | 5  | 5  | 1.31 | 0.98 | 1.04 | 0.95 | 0.95 |
| X020169 | RPS13     | IPI00221089.5 | 342 | 12 | 6  | 7  | 1.71 | 0.93 | 0.98 | 0.84 | 0.82 |
| X020169 | RPS14     | IPI00026271.5 | 149 | 4  | 3  | 3  | 1.35 | 0.91 | 0.87 | 0.82 | 0.77 |
| X020169 | RPS15     | IPI00479058.2 | 153 | 5  | 3  | 4  | 1.21 | 0.99 | 1.03 | 0.84 | 0.85 |
| X020169 | RPS15A    | IPI00221091.9 | 244 | 8  | 6  | 8  | 1.71 | 0.89 | 0.92 | 0.89 | 0.75 |
| X020169 | RPS17     | IPI00791157.1 | 212 | 9  | 5  | 6  | 1.29 | 0.88 | 0.97 | 0.87 | 0.78 |
| X020169 | RPS19     | IPI00215780.5 | 437 | 11 | 10 | 10 | 1.26 | 0.94 | 1.03 | 0.93 | 0.93 |
| X020169 | RPS20     | IPI00794659.1 | 183 | 7  | 4  | 4  | 1.23 | 0.92 | 0.90 | 0.98 | 0.85 |
| X020169 | RPS21     | IPI00387084.1 | 289 | 10 | 4  | 5  | 1.30 | 1.00 | 0.99 | 0.94 | 0.95 |
| X020169 | RPS23     | IPI00218606.7 | 207 | 5  | 4  | 5  | 1.47 | 0.87 | 0.92 | 0.77 | 0.72 |
| X020169 | RPS29     | IPI00639942.2 | 43  | 3  | 2  | 2  | 1.43 | 0.93 | 1.05 | 0.85 | 0.95 |
| X020169 | RPS3      | IPI00011253.3 | 633 | 20 | 15 | 18 | 1.31 | 0.86 | 0.93 | 0.80 | 0.84 |
| X020169 | RPS3A     | IPI00472119.2 | 531 | 20 | 12 | 13 | 1.14 | 0.96 | 0.88 | 0.80 | 0.76 |
| X020169 | RPS5      | IPI00008433.4 | 297 | 13 | 3  | 5  | 0.99 | 0.89 | 0.89 | 0.79 | 0.83 |
| X020169 | RPS6      | IPI00021840.1 | 379 | 10 | 6  | 6  | 1.53 | 1.03 | 0.85 | 0.76 | 0.82 |
| X020169 | RPS7      | IPI00013415.1 | 289 | 9  | 6  | 8  | 1.90 | 1.16 | 1.00 | 0.76 | 0.89 |
| X020169 | RPS8      | IPI00872430.1 | 351 | 6  | 6  | 6  | 1.82 | 0.80 | 0.81 | 0.79 | 0.67 |

|         |          |               |      |    |    |    |      |      |      |      |      |
|---------|----------|---------------|------|----|----|----|------|------|------|------|------|
| X020169 | RPS9     | IPI00221088.5 | 356  | 11 | 7  | 7  | 1.11 | 0.86 | 0.77 | 0.66 | 0.74 |
| X020169 | RPSA     | IPI00413108.4 | 731  | 14 | 11 | 11 | 1.21 | 0.96 | 1.03 | 0.93 | 0.94 |
| X020169 | RRAGA    | IPI00105620.2 | 77   | 4  | 2  | 2  | 1.18 | 0.87 | 1.24 | 1.13 | 1.14 |
| X020169 | RRBP1    | IPI00856098.1 | 1539 | 39 | 29 | 29 | 1.21 | 1.31 | 1.15 | 1.14 | 1.14 |
| X020169 | RRM1     | IPI00013871.1 | 376  | 9  | 5  | 6  | 1.03 | 1.02 | 1.13 | 1.03 | 1.03 |
| X020169 | RRP15    | IPI00007004.4 | 97   | 3  | 2  | 2  | 1.01 | 1.07 | 1.03 | 0.99 | 0.97 |
| X020169 | RRP1B    | IPI00290952.6 | 147  | 4  | 4  | 4  | 1.08 | 1.03 | 1.14 | 0.85 | 0.94 |
| X020169 | RSBN1L   | IPI00394815.4 | 180  | 7  | 4  | 4  | 0.88 | 0.98 | 0.94 | 0.91 | 0.96 |
| X020169 | RSL1D1   | IPI00008708.5 | 92   | 4  | 2  | 2  | 1.06 | 1.12 | 1.09 | 1.05 | 1.12 |
| X020169 | RSRC2    | IPI00419791.3 | 384  | 15 | 6  | 9  | 0.75 | 0.78 | 0.80 | 0.95 | 0.82 |
| X020169 | RUVBL1   | IPI00021187.4 | 582  | 11 | 10 | 10 | 1.12 | 1.01 | 0.96 | 0.85 | 0.90 |
| X020169 | RUVBL2   | IPI00009104.7 | 474  | 11 | 8  | 8  | 1.22 | 0.94 | 0.89 | 0.85 | 0.87 |
| X020169 | S100A11  | IPI00013895.1 | 115  | 3  | 3  | 3  | 1.53 | 0.82 | 0.82 | 0.82 | 0.73 |
| X020169 | S100A13  | IPI00016179.1 | 141  | 3  | 3  | 3  | 1.04 | 1.06 | 1.00 | 0.98 | 1.14 |
| X020169 | S100A8   | IPI00007047.1 | 101  | 6  | 2  | 2  | 1.60 | 0.98 | 1.17 | 1.61 | 1.18 |
| X020169 | S100P    | IPI00017526.1 | 137  | 2  | 2  | 2  | 1.14 | 0.91 | 0.83 | 0.79 | 0.83 |
| X020169 | SAFB     | IPI00646058.2 | 114  | 5  | 4  | 4  | 1.12 | 1.05 | 1.31 | 1.04 | 1.08 |
| X020169 | SAP30BP  | IPI00549296.4 | 280  | 7  | 3  | 3  | 0.95 | 0.82 | 0.91 | 0.84 | 0.93 |
| X020169 | SAPS3    | IPI00719725.1 | 101  | 3  | 2  | 2  | 1.08 | 0.96 | 0.95 | 0.93 | 0.95 |
| X020169 | SART1    | IPI00021417.3 | 800  | 19 | 11 | 12 | 1.03 | 1.11 | 1.09 | 0.99 | 1.07 |
| X020169 | SBDS     | IPI00427330.3 | 172  | 5  | 4  | 4  | 1.10 | 0.98 | 0.84 | 0.73 | 0.91 |
| X020169 | SCYE1    | IPI00793201.1 | 248  | 6  | 4  | 4  | 0.98 | 0.89 | 0.90 | 0.93 | 0.90 |
| X020169 | SDCCAG1  | IPI00301618.6 | 361  | 10 | 4  | 4  | 1.11 | 1.23 | 1.05 | 0.98 | 1.15 |
| X020169 | SDHA     | IPI00305166.2 | 778  | 23 | 3  | 3  | 0.99 | 1.02 | 0.95 | 1.10 | 0.96 |
| X020169 | SDHB     | IPI00294911.1 | 342  | 13 | 6  | 7  | 1.13 | 1.04 | 1.05 | 1.03 | 1.04 |
| X020169 | SEC13    | IPI00853598.1 | 232  | 5  | 3  | 3  | 1.17 | 0.89 | 0.93 | 0.93 | 0.77 |
| X020169 | SEC16A   | IPI00641384.2 | 334  | 11 | 4  | 4  | 0.85 | 0.83 | 0.93 | 0.83 | 1.04 |
| X020169 | SEC22B   | IPI00006865.3 | 174  | 6  | 3  | 3  | 1.42 | 1.09 | 1.05 | 1.18 | 0.98 |
| X020169 | SEC23A   | IPI00017375.2 | 532  | 16 | 8  | 8  | 0.89 | 0.97 | 1.00 | 0.98 | 0.98 |
| X020169 | SEC23B   | IPI00017376.2 | 503  | 13 | 9  | 10 | 0.97 | 0.97 | 0.98 | 0.95 | 0.93 |
| X020169 | SEC24A   | IPI00873472.1 | 269  | 6  | 3  | 3  | 1.09 | 0.93 | 1.09 | 1.07 | 1.15 |
| X020169 | SEC24B   | IPI00030851.2 | 265  | 9  | 5  | 5  | 0.97 | 0.92 | 1.04 | 1.08 | 0.96 |
| X020169 | SEC24C   | IPI00024661.4 | 599  | 12 | 11 | 11 | 1.02 | 0.91 | 1.01 | 1.04 | 1.05 |
| X020169 | SEC61A1  | IPI00218466.7 | 168  | 6  | 5  | 5  | 1.05 | 0.92 | 0.77 | 0.73 | 0.72 |
| X020169 | SEC61B   | IPI00220835.7 | 89   | 2  | 2  | 2  | 1.17 | 0.93 | 0.81 | 0.65 | 0.76 |
| X020169 | SEC62    | IPI00019004.1 | 91   | 4  | 4  | 4  | 1.13 | 1.13 | 0.98 | 0.90 | 0.88 |
| X020169 | SEC63    | IPI00218922.5 | 267  | 9  | 5  | 5  | 1.08 | 1.08 | 1.07 | 0.91 | 1.08 |
| X020169 | SELENBP  | IPI00012303.3 | 247  | 5  | 3  | 3  | 1.13 | 0.87 | 0.95 | 1.09 | 1.02 |
| X020169 | SERBP1   | IPI00410693.3 | 483  | 11 | 10 | 10 | 1.28 | 1.15 | 0.91 | 0.77 | 0.77 |
| X020169 | SERPINB1 | IPI00027444.1 | 392  | 10 | 8  | 8  | 1.06 | 1.10 | 1.04 | 1.04 | 1.01 |



|         |          |               |      |    |    |    |      |      |      |      |      |
|---------|----------|---------------|------|----|----|----|------|------|------|------|------|
| X020169 | SERPINB2 | IPI00007117.1 | 604  | 17 | 11 | 13 | 0.94 | 1.10 | 1.06 | 1.10 | 1.08 |
| X020169 | SERPINB6 | IPI00413451.1 | 202  | 6  | 3  | 3  | 1.20 | 1.10 | 1.03 | 1.06 | 1.07 |
| X020169 | SERPINB9 | IPI00032139.1 | 667  | 14 | 10 | 10 | 0.89 | 1.07 | 0.94 | 1.01 | 0.99 |
| X020169 | SERPINC1 | IPI00032179.2 | 131  | 4  | 3  | 3  | 1.02 | 1.14 | 1.10 | 1.13 | 1.05 |
| X020169 | SERPINH1 | IPI00032140.4 | 292  | 8  | 6  | 6  | 1.70 | 1.09 | 1.02 | 0.99 | 1.00 |
| X020169 | SF1      | IPI00386114.1 | 160  | 4  | 2  | 2  | 1.08 | 0.98 | 1.03 | 1.00 | 0.91 |
| X020169 | SF3A1    | IPI00017451.1 | 820  | 26 | 17 | 20 | 0.96 | 1.01 | 0.98 | 0.95 | 1.10 |
| X020169 | SF3A2    | IPI00017341.3 | 239  | 8  | 6  | 6  | 0.90 | 1.02 | 1.03 | 0.97 | 0.93 |
| X020169 | SF3A3    | IPI00029764.1 | 433  | 13 | 7  | 7  | 0.95 | 1.09 | 1.05 | 0.98 | 1.13 |
| X020169 | SF3B1    | IPI00026089.3 | 1484 | 44 | 29 | 32 | 1.02 | 1.02 | 1.08 | 1.02 | 1.19 |
| X020169 | SF3B14   | IPI00032827.1 | 246  | 8  | 6  | 7  | 1.21 | 1.16 | 1.13 | 1.10 | 1.13 |
| X020169 | SF3B2    | IPI00221106.5 | 1019 | 32 | 19 | 21 | 1.00 | 1.02 | 1.00 | 0.99 | 1.02 |
| X020169 | SF3B3    | IPI00300371.5 | 1785 | 48 | 32 | 37 | 0.98 | 1.00 | 1.01 | 1.01 | 1.07 |
| X020169 | SF3B4    | IPI00017339.1 | 211  | 6  | 4  | 5  | 1.04 | 1.19 | 1.06 | 1.02 | 1.06 |
| X020169 | SF3B5    | IPI00010404.1 | 64   | 4  | 2  | 3  | 0.85 | 1.00 | 0.92 | 0.96 | 0.97 |
| X020169 | SFPQ     | IPI00010740.1 | 760  | 33 | 18 | 25 | 1.25 | 1.46 | 1.06 | 0.92 | 0.98 |
| X020169 | SFRS1    | IPI00218591.2 | 446  | 12 | 7  | 8  | 1.18 | 0.92 | 0.90 | 0.98 | 0.93 |
| X020169 | SFRS10   | IPI00555647.3 | 200  | 4  | 3  | 3  | 1.31 | 0.75 | 0.76 | 0.65 | 0.67 |
| X020169 | SFRS11   | IPI00464952.2 | 336  | 11 | 6  | 7  | 0.82 | 0.85 | 0.92 | 0.95 | 0.93 |
| X020169 | SFRS12   | IPI00375462.1 | 524  | 12 | 8  | 8  | 0.84 | 0.91 | 0.94 | 0.94 | 0.90 |
| X020169 | SFRS15   | IPI00181702.3 | 178  | 4  | 3  | 3  | 1.07 | 1.07 | 1.08 | 0.97 | 1.05 |
| X020169 | SFRS17A  | IPI00024024.4 | 55   | 3  | 2  | 2  | 0.95 | 1.23 | 1.07 | 1.23 | 1.25 |
| X020169 | SFRS2    | IPI00005978.8 | 356  | 13 | 7  | 8  | 0.90 | 0.82 | 0.89 | 0.90 | 0.84 |
| X020169 | SFRS3    | IPI00010204.1 | 259  | 10 | 6  | 6  | 1.06 | 0.83 | 0.82 | 0.87 | 0.78 |
| X020169 | SFRS5    | IPI00915825.1 | 115  | 5  | 3  | 3  | 0.83 | 0.80 | 0.88 | 0.84 | 0.87 |
| X020169 | SFRS6    | IPI00012345.2 | 90   | 3  | 2  | 2  | 1.00 | 0.83 | 0.91 | 0.86 | 0.85 |
| X020169 | SFRS7    | IPI00003377.1 | 199  | 7  | 4  | 4  | 1.12 | 0.83 | 0.87 | 0.85 | 0.83 |
| X020169 | SFRS8    | IPI00290094.4 | 274  | 11 | 3  | 3  | 0.90 | 1.00 | 1.10 | 1.05 | 0.96 |
| X020169 | SFXN1    | IPI00009368.4 | 54   | 2  | 2  | 2  | 1.87 | 1.14 | 0.83 | 0.80 | 0.89 |
| X020169 | SGPL1    | IPI00099463.2 | 110  | 4  | 3  | 3  | 1.12 | 1.32 | 1.23 | 1.05 | 0.95 |
| X020169 | SHMT2    | IPI00789370.1 | 467  | 13 | 10 | 10 | 1.60 | 0.95 | 0.91 | 0.86 | 0.82 |
| X020169 | SKIV2L2  | IPI00647217.2 | 642  | 22 | 15 | 15 | 0.98 | 1.01 | 1.00 | 0.98 | 1.10 |
| X020169 | SKP1     | IPI00301364.3 | 446  | 10 | 8  | 8  | 1.14 | 1.21 | 1.05 | 1.15 | 1.02 |
| X020169 | SLC25A17 | IPI00014440.3 | 202  | 5  | 3  | 3  | 1.09 | 1.17 | 1.09 | 0.95 | 0.95 |
| X020169 | SLC25A21 | IPI00012690.1 | 53   | 2  | 2  | 2  | 1.70 | 0.71 | 1.12 | 0.79 | 0.91 |
| X020169 | SLC25A3  | IPI00022202.3 | 504  | 15 | 11 | 11 | 1.47 | 1.04 | 0.86 | 0.86 | 0.78 |
| X020169 | SLC25A5  | IPI00007188.5 | 660  | 22 | 5  | 5  | 1.80 | 0.96 | 0.97 | 0.80 | 0.79 |
| X020169 | SLC2A1   | IPI00220194.6 | 261  | 10 | 5  | 5  | 1.03 | 0.88 | 0.86 | 1.01 | 0.87 |
| X020169 | SMARCC1  | IPI00234252.3 | 483  | 15 | 7  | 7  | 0.99 | 1.05 | 1.07 | 0.97 | 1.10 |
| X020169 | SMARCC2  | IPI00216047.3 | 203  | 8  | 4  | 4  | 1.08 | 1.13 | 0.97 | 1.09 | 1.04 |

|         |         |               |      |    |    |    |      |      |      |      |      |
|---------|---------|---------------|------|----|----|----|------|------|------|------|------|
| X020169 | SMARCE1 | IPI00017669.5 | 376  | 10 | 7  | 7  | 1.01 | 1.02 | 0.96 | 0.95 | 0.99 |
| X020169 | SMU1    | IPI00305833.3 | 317  | 7  | 6  | 6  | 1.06 | 1.30 | 1.07 | 1.10 | 1.10 |
| X020169 | SNRNP20 | IPI00420014.2 | 2351 | 63 | 43 | 46 | 1.02 | 1.01 | 1.06 | 1.04 | 1.19 |
| X020169 | SNRNP40 | IPI00006723.5 | 200  | 7  | 4  | 4  | 1.09 | 1.13 | 1.05 | 0.96 | 1.00 |
| X020169 | SNRNP70 | IPI00290204.1 | 514  | 13 | 10 | 10 | 1.06 | 1.15 | 1.08 | 1.01 | 1.06 |
| X020169 | SNRPA   | IPI00012382.3 | 467  | 16 | 8  | 10 | 1.05 | 1.29 | 1.14 | 1.09 | 1.07 |
| X020169 | SNRPA1  | IPI00297477.3 | 378  | 9  | 7  | 7  | 0.99 | 1.15 | 1.00 | 0.93 | 0.96 |
| X020169 | SNRPB   | IPI00329512.3 | 433  | 17 | 9  | 14 | 0.99 | 1.16 | 1.06 | 1.03 | 1.03 |
| X020169 | SNRPB2  | IPI00029267.1 | 262  | 7  | 5  | 5  | 0.80 | 0.98 | 0.91 | 0.76 | 0.95 |
| X020169 | SNRPC   | IPI00641788.1 | 149  | 5  | 2  | 3  | 0.93 | 1.12 | 1.04 | 1.00 | 1.06 |
| X020169 | SNRPD1  | IPI00903286.1 | 103  | 2  | 2  | 2  | 1.00 | 0.98 | 0.87 | 0.86 | 0.79 |
| X020169 | SNRPD2  | IPI00017963.1 | 313  | 13 | 6  | 9  | 1.10 | 1.21 | 1.05 | 0.93 | 0.98 |
| X020169 | SNRPD3  | IPI00879750.1 | 98   | 4  | 3  | 3  | 1.15 | 1.25 | 1.12 | 1.12 | 1.11 |
| X020169 | SNRPE   | IPI00029266.1 | 133  | 4  | 3  | 4  | 0.93 | 0.91 | 0.90 | 0.94 | 0.93 |
| X020169 | SNRPF   | IPI00220528.6 | 204  | 10 | 4  | 9  | 1.11 | 1.25 | 1.07 | 1.05 | 1.07 |
| X020169 | SNW1    | IPI00910816.1 | 327  | 10 | 7  | 7  | 1.10 | 1.12 | 1.07 | 1.02 | 1.05 |
| X020169 | SNX9    | IPI00001883.1 | 230  | 9  | 3  | 3  | 1.00 | 0.92 | 0.98 | 0.86 | 1.01 |
| X020169 | SOAT1   | IPI00745125.2 | 104  | 3  | 3  | 3  | 0.97 | 0.95 | 0.96 | 1.01 | 0.93 |
| X020169 | SON     | IPI00218624.1 | 409  | 8  | 6  | 6  | 0.95 | 1.11 | 1.03 | 0.96 | 0.98 |
| X020169 | SPATA7  | IPI00871254.1 | 46   | 2  | 2  | 2  | 0.94 | 1.11 | 1.14 | 1.27 | 1.06 |
| X020169 | SPCS2   | IPI00472939.2 | 69   | 3  | 2  | 2  | 1.26 | 0.92 | 0.91 | 0.81 | 0.83 |
| X020169 | SPCS3   | IPI00300299.6 | 87   | 3  | 2  | 2  | 1.43 | 0.80 | 0.85 | 0.79 | 0.84 |
| X020169 | SPR     | IPI00017469.1 | 300  | 7  | 5  | 6  | 0.97 | 1.13 | 1.12 | 1.14 | 1.04 |
| X020169 | SPTAN1  | IPI00871535.1 | 1065 | 30 | 17 | 17 | 1.01 | 0.93 | 1.00 | 1.06 | 1.03 |
| X020169 | SPTBN1  | IPI00871932.1 | 453  | 20 | 6  | 6  | 1.06 | 0.88 | 0.98 | 1.03 | 1.07 |
| X020169 | SPTLC1  | IPI00005745.1 | 173  | 6  | 4  | 4  | 1.07 | 0.93 | 0.97 | 0.90 | 0.91 |
| X020169 | SR140   | IPI00143753.6 | 293  | 9  | 5  | 5  | 0.92 | 0.87 | 0.89 | 0.89 | 0.92 |
| X020169 | SRI     | IPI00027175.1 | 198  | 4  | 2  | 2  | 1.17 | 0.98 | 0.80 | 0.79 | 0.86 |
| X020169 | SRP09   | IPI00642816.2 | 240  | 7  | 5  | 5  | 1.41 | 1.13 | 1.09 | 0.99 | 0.95 |
| X020169 | SRP14   | IPI00293434.2 | 238  | 5  | 4  | 4  | 1.60 | 1.22 | 1.16 | 0.92 | 0.96 |
| X020169 | SRP54   | IPI00009822.1 | 281  | 6  | 4  | 4  | 1.02 | 1.01 | 1.17 | 0.89 | 0.85 |
| X020169 | SRP68   | IPI00168388.1 | 507  | 16 | 9  | 9  | 0.99 | 0.98 | 1.02 | 0.91 | 0.85 |
| X020169 | SRP72   | IPI00215888.4 | 493  | 11 | 9  | 9  | 1.00 | 1.04 | 1.08 | 0.90 | 0.92 |
| X020169 | SRPK1   | IPI00412344.5 | 168  | 4  | 3  | 3  | 1.14 | 1.21 | 1.07 | 1.26 | 1.02 |
| X020169 | SRPR    | IPI00385267.4 | 232  | 6  | 3  | 3  | 1.16 | 1.00 | 1.08 | 1.00 | 0.98 |
| X020169 | SRPRB   | IPI00295098.3 | 310  | 9  | 6  | 6  | 1.18 | 1.02 | 0.90 | 0.86 | 0.80 |
| X020169 | SSB     | IPI00009032.1 | 833  | 25 | 19 | 21 | 1.16 | 0.97 | 1.05 | 0.91 | 0.92 |
| X020169 | SSR1    | IPI00301021.3 | 104  | 3  | 3  | 3  | 1.55 | 0.72 | 0.71 | 0.73 | 0.67 |
| X020169 | SSRP1   | IPI00005154.1 | 255  | 11 | 7  | 7  | 1.02 | 0.97 | 0.94 | 0.86 | 0.90 |
| X020169 | ST13    | IPI00032826.1 | 204  | 5  | 4  | 4  | 1.07 | 0.92 | 0.85 | 0.77 | 0.80 |

|         |         |               |      |    |    |    |      |      |      |      |      |
|---------|---------|---------------|------|----|----|----|------|------|------|------|------|
| X020169 | STAT5B  | IPI00103415.1 | 633  | 16 | 2  | 3  | 1.04 | 1.00 | 1.03 | 1.04 | 1.06 |
| X020169 | STIP1   | IPI00479946.3 | 180  | 7  | 5  | 5  | 1.13 | 0.85 | 0.85 | 0.78 | 0.83 |
| X020169 | STMN1   | IPI00479997.4 | 236  | 7  | 4  | 4  | 1.14 | 0.83 | 0.76 | 0.77 | 0.78 |
| X020169 | STOML2  | IPI00334190.4 | 253  | 4  | 4  | 4  | 0.96 | 0.84 | 0.86 | 0.73 | 0.81 |
| X020169 | STRAP   | IPI00294536.2 | 103  | 3  | 3  | 3  | 0.94 | 0.86 | 0.84 | 0.86 | 0.97 |
| X020169 | SUB1    | IPI00221222.7 | 257  | 15 | 5  | 9  | 1.08 | 1.13 | 1.11 | 1.12 | 1.03 |
| X020169 | SUPT16H | IPI00026970.4 | 945  | 28 | 18 | 18 | 1.03 | 0.99 | 1.08 | 0.94 | 1.08 |
| X020169 | SUPT5H  | IPI00903259.1 | 112  | 5  | 3  | 3  | 0.99 | 0.94 | 1.07 | 0.99 | 0.98 |
| X020169 | SYMPK   | IPI00023344.2 | 82   | 4  | 2  | 2  | 1.38 | 1.28 | 1.39 | 1.23 | 1.25 |
| X020169 | SYNCRIP | IPI00018140.3 | 747  | 19 | 8  | 8  | 1.24 | 0.95 | 0.84 | 0.67 | 0.73 |
| X020169 | TAF2    | IPI00328144.6 | 64   | 2  | 2  | 2  | 1.25 | 0.83 | 1.01 | 0.89 | 0.94 |
| X020169 | TAF9    | IPI00002993.1 | 39   | 2  | 2  | 2  | 1.40 | 1.01 | 0.89 | 1.53 | 0.79 |
| X020169 | TAGLN2  | IPI00647915.1 | 377  | 12 | 8  | 9  | 1.16 | 0.84 | 0.86 | 0.78 | 0.77 |
| X020169 | TARDBP  | IPI00025815.2 | 270  | 8  | 4  | 4  | 1.15 | 0.76 | 0.79 | 0.70 | 0.70 |
| X020169 | TARS    | IPI00908949.1 | 280  | 10 | 7  | 7  | 1.14 | 0.95 | 0.96 | 0.94 | 0.84 |
| X020169 | TBL2    | IPI00000948.3 | 228  | 7  | 3  | 3  | 1.12 | 0.98 | 1.04 | 0.93 | 0.91 |
| X020169 | TCEB2   | IPI00410162.1 | 168  | 5  | 5  | 5  | 1.08 | 1.05 | 0.97 | 0.98 | 0.97 |
| X020169 | TCEB3   | IPI00018404.4 | 263  | 7  | 5  | 5  | 1.12 | 1.36 | 1.19 | 1.12 | 1.12 |
| X020169 | TCERG1  | IPI00247871.2 | 81   | 4  | 3  | 3  | 1.10 | 1.04 | 1.07 | 1.17 | 1.06 |
| X020169 | TCOF1   | IPI00815713.1 | 1711 | 45 | 36 | 37 | 1.18 | 1.04 | 1.08 | 1.03 | 1.09 |
| X020169 | TCP1    | IPI00290566.1 | 697  | 17 | 11 | 12 | 1.12 | 0.81 | 0.78 | 0.74 | 0.75 |
| X020169 | TF      | IPI00022463.1 | 1035 | 27 | 18 | 20 | 0.95 | 1.09 | 1.06 | 1.05 | 1.09 |
| X020169 | TFAM    | IPI00020928.1 | 568  | 19 | 14 | 15 | 1.39 | 1.08 | 1.11 | 0.79 | 0.96 |
| X020169 | TFPI2   | IPI00009198.3 | 234  | 6  | 2  | 2  | 0.98 | 1.12 | 1.14 | 0.92 | 1.00 |
| X020169 | TFRC    | IPI00022462.2 | 222  | 9  | 4  | 4  | 1.12 | 0.87 | 0.92 | 0.69 | 0.72 |
| X020169 | THOC1   | IPI00305374.5 | 152  | 6  | 3  | 3  | 1.04 | 1.18 | 1.13 | 1.05 | 1.12 |
| X020169 | THOC2   | IPI00158615.7 | 572  | 19 | 11 | 11 | 1.08 | 1.18 | 1.09 | 1.07 | 1.14 |
| X020169 | THOC3   | IPI00063729.4 | 253  | 7  | 5  | 5  | 1.09 | 1.28 | 1.03 | 1.01 | 1.06 |
| X020169 | THOC4   | IPI00328840.9 | 333  | 9  | 5  | 8  | 1.15 | 1.18 | 1.01 | 0.99 | 0.96 |
| X020169 | THOC5   | IPI00299417.3 | 79   | 4  | 2  | 2  | 1.12 | 1.36 | 1.23 | 1.10 | 1.07 |
| X020169 | THOP1   | IPI00549189.4 | 77   | 3  | 2  | 2  | 0.95 | 1.08 | 0.86 | 1.02 | 0.99 |
| X020169 | THRAP3  | IPI00104050.3 | 683  | 17 | 11 | 11 | 0.93 | 0.94 | 0.98 | 0.92 | 0.97 |
| X020169 | TIMM44  | IPI00306516.1 | 275  | 9  | 4  | 4  | 1.26 | 1.08 | 0.98 | 0.81 | 0.87 |
| X020169 | TIMM50  | IPI00418497.1 | 384  | 8  | 6  | 6  | 1.33 | 1.01 | 0.96 | 1.00 | 0.95 |
| X020169 | TIPRL   | IPI00745568.2 | 68   | 6  | 2  | 2  | 1.17 | 1.09 | 1.04 | 1.00 | 0.86 |
| X020169 | TK1     | IPI00791117.1 | 261  | 8  | 6  | 7  | 1.04 | 0.95 | 0.97 | 0.98 | 0.90 |
| X020169 | TK2     | IPI00337439.2 | 107  | 3  | 2  | 2  | 1.04 | 1.27 | 1.23 | 1.26 | 1.06 |
| X020169 | TKT     | IPI00643920.3 | 293  | 7  | 4  | 4  | 1.57 | 0.88 | 0.88 | 0.79 | 0.75 |
| X020169 | TMPO    | IPI00030131.3 | 116  | 6  | 4  | 5  | 1.21 | 1.06 | 0.99 | 0.95 | 0.93 |
| X020169 | TMPO    | IPI00216230.3 | 392  | 11 | 3  | 3  | 1.00 | 1.02 | 1.02 | 0.97 | 1.08 |

|         |         |                |      |    |    |    |      |      |      |      |      |
|---------|---------|----------------|------|----|----|----|------|------|------|------|------|
| X020169 | TNPO1   | IPI00024364.2  | 433  | 15 | 10 | 10 | 0.83 | 0.83 | 0.76 | 0.74 | 0.80 |
| X020169 | TNPO3   | IPI00872398.1  | 233  | 6  | 3  | 3  | 0.82 | 0.78 | 0.79 | 0.91 | 0.80 |
| X020169 | TOP1    | IPI00902597.1  | 1441 | 45 | 29 | 30 | 1.08 | 1.06 | 1.08 | 0.89 | 0.93 |
| X020169 | TPM3    | IPI00218319.3  | 994  | 26 | 14 | 15 | 1.16 | 0.88 | 0.90 | 0.92 | 0.87 |
| X020169 | TPM4    | IPI00010779.4  | 175  | 7  | 2  | 2  | 0.92 | 0.84 | 0.85 | 1.09 | 0.82 |
| X020169 | TPP2    | IPI00640197.1  | 125  | 6  | 2  | 2  | 1.14 | 0.83 | 0.98 | 0.93 | 1.23 |
| X020169 | TPPP3   | IPI00306413.3  | 224  | 6  | 2  | 2  | 0.97 | 1.32 | 1.12 | 0.97 | 1.12 |
| X020169 | TRAM1   | IPI00790653.1  | 91   | 3  | 2  | 2  | 0.98 | 0.71 | 0.77 | 0.66 | 0.69 |
| X020169 | TRAP1   | IPI00030275.5  | 366  | 9  | 3  | 4  | 1.83 | 0.92 | 0.87 | 1.32 | 0.83 |
| X020169 | TRIM25  | IPI00029629.3  | 733  | 16 | 14 | 14 | 0.94 | 1.03 | 0.98 | 1.13 | 1.02 |
| X020169 | TRIM28  | IPI00438229.2  | 617  | 22 | 13 | 13 | 1.02 | 0.82 | 0.86 | 0.84 | 0.91 |
| X020169 | TRIP6   | IPI00301561.1  | 92   | 3  | 2  | 2  | 0.88 | 0.89 | 0.92 | 0.92 | 0.70 |
| X020169 | TROVE2  | IPI00019450.2  | 194  | 8  | 6  | 6  | 1.00 | 0.91 | 1.02 | 0.86 | 0.86 |
| X020169 | TRRAP   | IPI00069084.2  | 103  | 9  | 2  | 2  | 1.20 | 1.14 | 0.84 | 1.55 | 1.21 |
| X020169 | TSN     | IPI00018768.1  | 145  | 3  | 3  | 3  | 1.27 | 0.94 | 0.93 | 0.88 | 0.91 |
| X020169 | TUBA1A  | IPI00180675.4  | 1221 | 31 | 17 | 25 | 1.17 | 0.96 | 1.01 | 0.98 | 0.91 |
| X020169 | TUBB    | IPI00011654.2  | 1290 | 50 | 3  | 5  | 1.14 | 0.95 | 1.10 | 1.03 | 0.98 |
| X020169 | TUBB2B  | IPI00031370.3  | 219  | 5  | 4  | 4  | 0.92 | 0.96 | 0.99 | 1.02 | 1.01 |
| X020169 | TUFM    | IPI00027107.5  | 566  | 14 | 10 | 10 | 1.73 | 0.88 | 0.92 | 0.79 | 0.84 |
| X020169 | TWISTNB | IPI00005477.3  | 152  | 3  | 2  | 2  | 1.14 | 1.33 | 1.25 | 1.14 | 1.14 |
| X020169 | TXN     | IPI00216298.6  | 330  | 11 | 6  | 11 | 0.79 | 1.00 | 0.94 | 0.94 | 0.98 |
| X020169 | TXNRD1  | IPI00884896.1  | 282  | 8  | 5  | 5  | 1.09 | 0.99 | 1.00 | 0.98 | 0.98 |
| X020169 | TYMS    | IPI00221108.5  | 276  | 8  | 3  | 3  | 0.78 | 0.94 | 0.95 | 1.15 | 0.97 |
| X020169 | U2AF1   | IPI00005613.3  | 629  | 22 | 11 | 20 | 0.99 | 1.11 | 1.01 | 1.05 | 1.01 |
| X020169 | U2AF2   | IPI00031556.7  | 789  | 28 | 14 | 21 | 1.12 | 1.22 | 1.19 | 1.14 | 1.09 |
| X020169 | UBA1    | IPI00645078.1  | 216  | 6  | 4  | 4  | 1.20 | 0.89 | 0.86 | 0.94 | 0.91 |
| X020169 | UBA6    | IPI00023647.4  | 230  | 5  | 3  | 3  | 1.04 | 0.85 | 0.96 | 1.10 | 1.00 |
| X020169 | UBAP2L  | IPI00514856.4  | 225  | 6  | 4  | 4  | 1.09 | 1.40 | 1.05 | 0.89 | 0.82 |
| X020169 | UBE2L3  | IPI00909773.1  | 140  | 3  | 3  | 3  | 1.56 | 0.98 | 0.83 | 0.74 | 0.80 |
| X020169 | UBE2L6  | IPI00329563.10 | 72   | 3  | 2  | 2  | 0.88 | 1.06 | 0.99 | 1.00 | 0.90 |
| X020169 | UBE2N   | IPI00003949.1  | 166  | 3  | 3  | 3  | 1.60 | 0.97 | 0.89 | 0.76 | 0.76 |
| X020169 | UBTF    | IPI00014533.1  | 321  | 14 | 5  | 5  | 0.88 | 1.00 | 0.96 | 0.96 | 0.92 |
| X020169 | UGCGL1  | IPI00024466.2  | 383  | 14 | 8  | 8  | 1.06 | 0.92 | 0.96 | 0.96 | 1.01 |
| X020169 | UHRF1   | IPI00797279.1  | 72   | 2  | 2  | 2  | 1.12 | 1.00 | 1.19 | 1.19 | 0.91 |
| X020169 | UPF1    | IPI00034049.1  | 124  | 4  | 2  | 2  | 1.35 | 0.68 | 0.90 | 1.13 | 0.90 |
| X020169 | UPF2    | IPI00300504.5  | 114  | 6  | 3  | 4  | 1.07 | 0.94 | 1.31 | 0.98 | 1.18 |
| X020169 | UPF3B   | IPI00023409.1  | 142  | 5  | 2  | 2  | 1.02 | 1.06 | 0.98 | 0.76 | 0.89 |
| X020169 | UPP1    | IPI00004406.1  | 69   | 2  | 2  | 2  | 1.15 | 1.06 | 1.23 | 1.52 | 1.22 |
| X020169 | USP10   | IPI00291946.8  | 113  | 2  | 2  | 2  | 0.99 | 0.75 | 0.82 | 1.02 | 0.76 |
| X020169 | USP15   | IPI00000728.3  | 241  | 10 | 5  | 5  | 0.82 | 0.80 | 0.96 | 0.93 | 0.95 |

|         |         |                |      |    |    |    |      |      |      |      |      |
|---------|---------|----------------|------|----|----|----|------|------|------|------|------|
| X020169 | USP24   | IPI00902614.2  | 415  | 15 | 10 | 10 | 0.94 | 0.94 | 1.03 | 1.06 | 1.09 |
| X020169 | USP39   | IPI00419844.3  | 127  | 4  | 4  | 4  | 1.05 | 0.98 | 1.09 | 0.80 | 0.98 |
| X020169 | USP9X   | IPI00221012.7  | 303  | 17 | 4  | 4  | 0.86 | 0.83 | 0.78 | 0.92 | 0.89 |
| X020169 | UTP14A  | IPI001071113.3 | 316  | 9  | 8  | 8  | 0.97 | 1.21 | 0.99 | 0.96 | 0.99 |
| X020169 | UTP15   | IPI00152708.3  | 59   | 2  | 2  | 2  | 1.12 | 0.93 | 0.95 | 1.33 | 0.88 |
| X020169 | VARS    | IPI00893918.1  | 291  | 7  | 4  | 4  | 1.07 | 0.77 | 1.19 | 0.97 | 0.85 |
| X020169 | VASP    | IPI00902584.1  | 86   | 3  | 3  | 3  | 1.50 | 0.88 | 0.94 | 0.81 | 0.80 |
| X020169 | VAT1    | IPI00156689.3  | 45   | 2  | 2  | 2  | 1.64 | 0.87 | 0.88 | 0.81 | 0.84 |
| X020169 | VCL     | IPI00307162.2  | 276  | 8  | 2  | 2  | 1.07 | 0.70 | 0.70 | 0.80 | 0.68 |
| X020169 | VIM     | IPI00418471.6  | 795  | 18 | 14 | 14 | 1.13 | 0.80 | 0.80 | 0.69 | 0.72 |
| X020169 | WASF2   | IPI00472164.2  | 84   | 4  | 2  | 2  | 0.99 | 1.15 | 1.01 | 1.08 | 1.08 |
| X020169 | WBP11   | IPI00170786.1  | 226  | 7  | 5  | 5  | 1.19 | 1.13 | 1.09 | 0.92 | 1.04 |
| X020169 | WDR33   | IPI00106567.2  | 345  | 12 | 6  | 6  | 1.09 | 1.09 | 1.07 | 1.09 | 1.11 |
| X020169 | WDR61   | IPI00019269.3  | 396  | 7  | 5  | 5  | 0.97 | 1.17 | 1.07 | 1.03 | 1.03 |
| X020169 | WDR77   | IPI00012202.1  | 109  | 3  | 2  | 2  | 1.20 | 1.06 | 0.96 | 1.05 | 0.95 |
| X020169 | WDR82   | IPI00152695.2  | 216  | 7  | 5  | 5  | 1.11 | 1.22 | 1.11 | 1.05 | 1.03 |
| X020169 | WDR92   | IPI00465211.1  | 232  | 4  | 3  | 3  | 0.99 | 1.14 | 0.98 | 1.05 | 1.07 |
| X020169 | WWP2    | IPI00013010.6  | 218  | 9  | 4  | 4  | 0.92 | 0.92 | 1.00 | 1.01 | 1.08 |
| X020169 | XPO5    | IPI00640703.3  | 563  | 16 | 10 | 10 | 0.78 | 0.75 | 0.73 | 0.75 | 0.85 |
| X020169 | XPO7    | IPI00855940.1  | 81   | 5  | 3  | 3  | 0.89 | 0.84 | 0.85 | 0.87 | 0.95 |
| X020169 | XPOT    | IPI00306290.5  | 226  | 5  | 5  | 5  | 0.98 | 0.98 | 1.01 | 0.97 | 0.90 |
| X020169 | XRCC5   | IPI00220834.8  | 522  | 19 | 10 | 10 | 1.08 | 0.91 | 0.85 | 0.73 | 0.78 |
| X020169 | XRN2    | IPI00100151.4  | 185  | 6  | 2  | 2  | 0.92 | 0.87 | 0.93 | 0.86 | 0.93 |
| X020169 | XTP3TPA | IPI00012197.1  | 536  | 13 | 8  | 9  | 0.77 | 0.84 | 0.89 | 0.89 | 1.78 |
| X020169 | YARS    | IPI00007074.5  | 685  | 19 | 14 | 14 | 1.37 | 0.91 | 1.00 | 0.88 | 0.87 |
| X020169 | YRDC    | IPI00384180.4  | 89   | 3  | 2  | 2  | 0.94 | 0.92 | 1.03 | 0.75 | 1.00 |
| X020169 | YWHAE   | IPI00000816.1  | 538  | 14 | 8  | 9  | 1.56 | 0.85 | 0.93 | 0.79 | 0.78 |
| X020169 | YWHAG   | IPI00220642.7  | 195  | 6  | 3  | 3  | 1.59 | 0.84 | 0.74 | 0.76 | 0.67 |
| X020169 | YY1     | IPI00878557.1  | 342  | 11 | 6  | 6  | 1.15 | 1.19 | 1.12 | 1.02 | 1.00 |
| X020169 | ZC3H11A | IPI00328306.9  | 2149 | 60 | 41 | 44 | 0.95 | 1.02 | 1.04 | 1.04 | 1.07 |
| X020169 | ZC3H14  | IPI00903256.1  | 1223 | 36 | 26 | 27 | 0.95 | 1.09 | 1.08 | 1.05 | 1.07 |
| X020169 | ZC3H15  | IPI00000279.3  | 500  | 10 | 10 | 10 | 1.27 | 1.21 | 1.14 | 0.95 | 0.95 |
| X020169 | ZC3H4   | IPI00187011.4  | 353  | 11 | 7  | 8  | 0.86 | 0.94 | 0.92 | 0.93 | 0.99 |
| X020169 | ZC3H6   | IPI00410656.1  | 152  | 6  | 4  | 4  | 0.85 | 0.91 | 0.91 | 1.03 | 1.01 |
| X020169 | ZC3H8   | IPI00307760.7  | 340  | 13 | 9  | 10 | 0.86 | 1.09 | 1.09 | 1.13 | 1.13 |
| X020169 | ZC3HAV1 | IPI00410067.1  | 162  | 7  | 2  | 2  | 0.93 | 0.87 | 0.92 | 0.92 | 0.82 |
| X020169 | ZGPAT   | IPI00553175.7  | 81   | 2  | 2  | 2  | 1.01 | 1.21 | 1.13 | 0.97 | 0.99 |
| X020169 | ZMAT2   | IPI00069734.2  | 86   | 4  | 3  | 3  | 1.12 | 1.21 | 3.30 | 0.96 | 1.05 |
| X020169 | ZNF207  | IPI00792837.1  | 163  | 5  | 4  | 4  | 1.10 | 1.10 | 0.92 | 0.97 | 0.97 |
| X020169 | ZRANB2  | IPI00845348.1  | 219  | 6  | 3  | 3  | 1.07 | 0.96 | 0.99 | 0.96 | 0.89 |

|         |      |               |    |   |   |   |      |      |      |      |      |
|---------|------|---------------|----|---|---|---|------|------|------|------|------|
| X020169 | ZW10 | IPI00011631.6 | 55 | 3 | 2 | 2 | 1.19 | 1.04 | 1.17 | 1.39 | 1.01 |
|---------|------|---------------|----|---|---|---|------|------|------|------|------|

ion of

| TMT129L | Hill | IC50    | pIC50  |
|---------|------|---------|--------|
| 1.00    | 0.52 | 0.16    | 6.80   |
| 1.00    | 1.00 | 24.00   | 4.62   |
| 1.00    | NA   | ≥ 40.00 | ≤ 4.40 |
| 1.00    | 1    | ≥ 40.00 | ≤ 4.40 |
| 1.00    | 1    | ≥ 40.00 | ≤ 4.40 |
| 1.00    | 1    | ≥ 40.00 | ≤ 4.40 |
| 1.00    | 1    | ≥ 40.00 | ≤ 4.40 |
| 1.00    | NA   | ≥ 40.00 | ≤ 4.40 |
| 1.00    | NA   | ≥ 40.00 | ≤ 4.40 |
| 1.00    | 1    | ≥ 40.00 | ≤ 4.40 |
| 1.00    | NA   | ≥ 40.00 | ≤ 4.40 |
| 1.00    | 1    | ≥ 40.00 | ≤ 4.40 |
| 1.00    | 1    | ≥ 40.00 | ≤ 4.40 |
| 1.00    | 1    | ≥ 40.00 | ≤ 4.40 |
| 1.00    | 1    | ≥ 40.00 | ≤ 4.40 |
| 1.00    | 1    | ≥ 40.00 | ≤ 4.40 |
| 1.00    | 1    | ≥ 40.00 | ≤ 4.40 |
| 1.00    | NA   | ≥ 40.00 | ≤ 4.40 |
| 1.00    | NA   | ≥ 40.00 | ≤ 4.40 |
| 1.00    | 1    | ≥ 40.00 | ≤ 4.40 |
| 1.00    | NA   | ≥ 40.00 | ≤ 4.40 |
| 1.00    | NA   | ≥ 40.00 | ≤ 4.40 |
| 1.00    | NA   | ≥ 40.00 | ≤ 4.40 |
| 1.00    | 1    | ≥ 40.00 | ≤ 4.40 |
| 1.00    | 1    | ≥ 40.00 | ≤ 4.40 |
| 1.00    | NA   | ≥ 40.00 | ≤ 4.40 |
| 1.00    | 1    | ≥ 40.00 | ≤ 4.40 |
| 1.00    | NA   | ≥ 40.00 | ≤ 4.40 |

|      |     |              |             |
|------|-----|--------------|-------------|
| 1.00 | 1   | $\geq 40.00$ | $\leq 4.40$ |
| 1.00 | 1   | $\geq 40.00$ | $\leq 4.40$ |
| 1.00 | 1   | $\geq 40.00$ | $\leq 4.40$ |
| 1.00 | NA  | $\geq 40.00$ | $\leq 4.40$ |
| 1.00 | 1   | $\geq 40.00$ | $\leq 4.40$ |
| 1.00 | NA  | $\geq 40.00$ | $\leq 4.40$ |
| 1.00 | 1   | $\geq 40.00$ | $\leq 4.40$ |
| 1.00 | 2.2 | $\geq 40.00$ | $\leq 4.40$ |
| 1.00 | NA  | $\geq 40.00$ | $\leq 4.40$ |
| 1.00 | 1   | $\geq 40.00$ | $\leq 4.40$ |
| 1.00 | NA  | $\geq 40.00$ | $\leq 4.40$ |
| 1.00 | 1   | $\geq 40.00$ | $\leq 4.40$ |
| 1.00 | 1   | $\geq 40.00$ | $\leq 4.40$ |
| 1.00 | NA  | $\geq 40.00$ | $\leq 4.40$ |
| 1.00 | NA  | $\geq 40.00$ | $\leq 4.40$ |
| 1.00 | 1   | $\geq 40.00$ | $\leq 4.40$ |
| 1.00 | NA  | $\geq 40.00$ | $\leq 4.40$ |
| 1.00 | NA  | $\geq 40.00$ | $\leq 4.40$ |
| 1.00 | NA  | $\geq 40.00$ | $\leq 4.40$ |
| 1.00 | NA  | $\geq 40.00$ | $\leq 4.40$ |
| 1.00 | NA  | $\geq 40.00$ | $\leq 4.40$ |
| 1.00 | NA  | $\geq 40.00$ | $\leq 4.40$ |
| 1.00 | NA  | $\geq 40.00$ | $\leq 4.40$ |
| 1.00 | NA  | $\geq 40.00$ | $\leq 4.40$ |
| 1.00 | NA  | $\geq 40.00$ | $\leq 4.40$ |
| 1.00 | 1   | $\geq 40.00$ | $\leq 4.40$ |
| 1.00 | 1   | $\geq 40.00$ | $\leq 4.40$ |
| 1.00 | NA  | $\geq 40.00$ | $\leq 4.40$ |
| 1.00 | NA  | $\geq 40.00$ | $\leq 4.40$ |
| 1.00 | 1   | $\geq 40.00$ | $\leq 4.40$ |
| 1.00 | 1   | $\geq 40.00$ | $\leq 4.40$ |
| 1.00 | NA  | $\geq 40.00$ | $\leq 4.40$ |
| 1.00 | NA  | $\geq 40.00$ | $\leq 4.40$ |
| 1.00 | 1   | $\geq 40.00$ | $\leq 4.40$ |
| 1.00 | NA  | $\geq 40.00$ | $\leq 4.40$ |
| 1.00 | NA  | $\geq 40.00$ | $\leq 4.40$ |
| 1.00 | 1   | $\geq 40.00$ | $\leq 4.40$ |
| 1.00 | 1   | $\geq 40.00$ | $\leq 4.40$ |
| 1.00 | NA  | $\geq 40.00$ | $\leq 4.40$ |



|      |      |              |             |
|------|------|--------------|-------------|
| 1.00 | 1    | $\geq 40.00$ | $\leq 4.40$ |
| 1.00 | 1    | $\geq 40.00$ | $\leq 4.40$ |
| 1.00 | NA   | $\geq 40.00$ | $\leq 4.40$ |
| 1.00 | 1    | $\geq 40.00$ | $\leq 4.40$ |
| 1.00 | 1    | $\geq 40.00$ | $\leq 4.40$ |
| 1.00 | NA   | $\geq 40.00$ | $\leq 4.40$ |
| 1.00 | NA   | $\geq 40.00$ | $\leq 4.40$ |
| 1.00 | NA   | $\geq 40.00$ | $\leq 4.40$ |
| 1.00 | NA   | $\geq 40.00$ | $\leq 4.40$ |
| 1.00 | NA   | $\geq 40.00$ | $\leq 4.40$ |
| 1.00 | NA   | $\geq 40.00$ | $\leq 4.40$ |
| 1.00 | NA   | $\geq 40.00$ | $\leq 4.40$ |
| 1.00 | 1    | $\geq 40.00$ | $\leq 4.40$ |
| 1.00 | 1    | $\geq 40.00$ | $\leq 4.40$ |
| 1.00 | NA   | $\geq 40.00$ | $\leq 4.40$ |
| 1.00 | 1    | $\geq 40.00$ | $\leq 4.40$ |
| 1.00 | 1    | $\geq 40.00$ | $\leq 4.40$ |
| 1.00 | NA   | $\geq 40.00$ | $\leq 4.40$ |
| 1.00 | NA   | $\geq 40.00$ | $\leq 4.40$ |
| 1.00 | 1    | $\geq 40.00$ | $\leq 4.40$ |
| 1.00 | NA   | $\geq 40.00$ | $\leq 4.40$ |
| 1.00 | NA   | $\geq 40.00$ | $\leq 4.40$ |
| 1.00 | 1.04 | $\geq 40.00$ | $\leq 4.40$ |
| 1.00 | NA   | $\geq 40.00$ | $\leq 4.40$ |
| 1.00 | NA   | $\geq 40.00$ | $\leq 4.40$ |
| 1.00 | NA   | $\geq 40.00$ | $\leq 4.40$ |
| 1.00 | NA   | $\geq 40.00$ | $\leq 4.40$ |
| 1.00 | NA   | $\geq 40.00$ | $\leq 4.40$ |
| 1.00 | NA   | $\geq 40.00$ | $\leq 4.40$ |
| 1.00 | NA   | $\geq 40.00$ | $\leq 4.40$ |
| 1.00 | NA   | $\geq 40.00$ | $\leq 4.40$ |
| 1.00 | 1    | $\geq 40.00$ | $\leq 4.40$ |
| 1.00 | 1    | $\geq 40.00$ | $\leq 4.40$ |
| 1.00 | NA   | $\geq 40.00$ | $\leq 4.40$ |
| 1.00 | NA   | $\geq 40.00$ | $\leq 4.40$ |
| 1.00 | 1    | $\geq 40.00$ | $\leq 4.40$ |
| 1.00 | 1    | $\geq 40.00$ | $\leq 4.40$ |
| 1.00 | NA   | $\geq 40.00$ | $\leq 4.40$ |
| 1.00 | 1    | $\geq 40.00$ | $\leq 4.40$ |



|      |      |         |        |
|------|------|---------|--------|
| 1.00 | 1    | ≥ 40.00 | ≤ 4.40 |
| 1.00 | NA   | ≥ 40.00 | ≤ 4.40 |
| 1.00 | NA   | ≥ 40.00 | ≤ 4.40 |
| 1.00 | NA   | ≥ 40.00 | ≤ 4.40 |
| 1.00 | NA   | ≥ 40.00 | ≤ 4.40 |
| 1.00 | 0.93 | ≥ 40.00 | ≤ 4.40 |
| 1.00 | 1    | ≥ 40.00 | ≤ 4.40 |
| 1.00 | NA   | ≥ 40.00 | ≤ 4.40 |
| 1.00 | NA   | ≥ 40.00 | ≤ 4.40 |
| 1.00 | NA   | ≥ 40.00 | ≤ 4.40 |
| 1.00 | 1    | ≥ 40.00 | ≤ 4.40 |
| 1.00 | 1    | ≥ 40.00 | ≤ 4.40 |
| 1.00 | 1    | ≥ 40.00 | ≤ 4.40 |
| 1.00 | NA   | ≥ 40.00 | ≤ 4.40 |
| 1.00 | NA   | ≥ 40.00 | ≤ 4.40 |
| 1.00 | NA   | ≥ 40.00 | ≤ 4.40 |
| 1.00 | NA   | ≥ 40.00 | ≤ 4.40 |
| 1.00 | NA   | ≥ 40.00 | ≤ 4.40 |
| 1.00 | 1    | ≥ 40.00 | ≤ 4.40 |
| 1.00 | NA   | ≥ 40.00 | ≤ 4.40 |
| 1.00 | NA   | ≥ 40.00 | ≤ 4.40 |
| 1.00 | 1    | ≥ 40.00 | ≤ 4.40 |
| 1.00 | 1    | ≥ 40.00 | ≤ 4.40 |
| 1.00 | 1    | ≥ 40.00 | ≤ 4.40 |
| 1.00 | 1    | ≥ 40.00 | ≤ 4.40 |
| 1.00 | 1.36 | ≥ 40.00 | ≤ 4.40 |
| 1.00 | NA   | ≥ 40.00 | ≤ 4.40 |
| 1.00 | NA   | ≥ 40.00 | ≤ 4.40 |
| 1.00 | NA   | ≥ 40.00 | ≤ 4.40 |
| 1.00 | 1    | ≥ 40.00 | ≤ 4.40 |
| 1.00 | 1.17 | ≥ 40.00 | ≤ 4.40 |
| 1.00 | 2.3  | ≥ 40.00 | ≤ 4.40 |
| 1.00 | NA   | ≥ 40.00 | ≤ 4.40 |
| 1.00 | NA   | ≥ 40.00 | ≤ 4.40 |
| 1.00 | 0.58 | ≥ 40.00 | ≤ 4.40 |
| 1.00 | NA   | ≥ 40.00 | ≤ 4.40 |
| 1.00 | NA   | ≥ 40.00 | ≤ 4.40 |
| 1.00 | NA   | ≥ 40.00 | ≤ 4.40 |
| 1.00 | NA   | ≥ 40.00 | ≤ 4.40 |

|      |      |              |             |
|------|------|--------------|-------------|
| 1.00 | NA   | $\geq 40.00$ | $\leq 4.40$ |
| 1.00 | NA   | $\geq 40.00$ | $\leq 4.40$ |
| 1.00 | 1    | $\geq 40.00$ | $\leq 4.40$ |
| 1.00 | NA   | $\geq 40.00$ | $\leq 4.40$ |
| 1.00 | NA   | $\geq 40.00$ | $\leq 4.40$ |
| 1.00 | NA   | $\geq 40.00$ | $\leq 4.40$ |
| 1.00 | 1    | $\geq 40.00$ | $\leq 4.40$ |
| 1.00 | 1    | $\geq 40.00$ | $\leq 4.40$ |
| 1.00 | 1    | $\geq 40.00$ | $\leq 4.40$ |
| 1.00 | 1    | $\geq 40.00$ | $\leq 4.40$ |
| 1.00 | NA   | $\geq 40.00$ | $\leq 4.40$ |
| 1.00 | 1    | $\geq 40.00$ | $\leq 4.40$ |
| 1.00 | 0.84 | $\geq 40.00$ | $\leq 4.40$ |
| 1.00 | 0.56 | $\geq 40.00$ | $\leq 4.40$ |
| 1.00 | NA   | $\geq 40.00$ | $\leq 4.40$ |
| 1.00 | 1    | $\geq 40.00$ | $\leq 4.40$ |
| 1.00 | NA   | $\geq 40.00$ | $\leq 4.40$ |
| 1.00 | NA   | $\geq 40.00$ | $\leq 4.40$ |
| 1.00 | 1    | $\geq 40.00$ | $\leq 4.40$ |
| 1.00 | 1    | $\geq 40.00$ | $\leq 4.40$ |
| 1.00 | NA   | $\geq 40.00$ | $\leq 4.40$ |
| 1.00 | NA   | $\geq 40.00$ | $\leq 4.40$ |
| 1.00 | NA   | $\geq 40.00$ | $\leq 4.40$ |
| 1.00 | 0.71 | $\geq 40.00$ | $\leq 4.40$ |
| 1.00 | NA   | $\geq 40.00$ | $\leq 4.40$ |
| 1.00 | NA   | $\geq 40.00$ | $\leq 4.40$ |
| 1.00 | NA   | $\geq 40.00$ | $\leq 4.40$ |
| 1.00 | NA   | $\geq 40.00$ | $\leq 4.40$ |
| 1.00 | NA   | $\geq 40.00$ | $\leq 4.40$ |
| 1.00 | 1    | $\geq 40.00$ | $\leq 4.40$ |
| 1.00 | 1    | $\geq 40.00$ | $\leq 4.40$ |
| 1.00 | 1.12 | $\geq 40.00$ | $\leq 4.40$ |
| 1.00 | NA   | $\geq 40.00$ | $\leq 4.40$ |
| 1.00 | NA   | $\geq 40.00$ | $\leq 4.40$ |
| 1.00 | 1    | $\geq 40.00$ | $\leq 4.40$ |
| 1.00 | NA   | $\geq 40.00$ | $\leq 4.40$ |
| 1.00 | 1    | $\geq 40.00$ | $\leq 4.40$ |
| 1.00 | 1    | $\geq 40.00$ | $\leq 4.40$ |
| 1.00 | NA   | $\geq 40.00$ | $\leq 4.40$ |
| 1.00 | 1    | $\geq 40.00$ | $\leq 4.40$ |

|      |    |              |             |
|------|----|--------------|-------------|
| 1.00 | 1  | $\geq 40.00$ | $\leq 4.40$ |
| 1.00 | NA | $\geq 40.00$ | $\leq 4.40$ |
| 1.00 | NA | $\geq 40.00$ | $\leq 4.40$ |
| 1.00 | NA | $\geq 40.00$ | $\leq 4.40$ |
| 1.00 | 1  | $\geq 40.00$ | $\leq 4.40$ |
| 1.00 | NA | $\geq 40.00$ | $\leq 4.40$ |
| 1.00 | 1  | $\geq 40.00$ | $\leq 4.40$ |
| 1.00 | 1  | $\geq 40.00$ | $\leq 4.40$ |
| 1.00 | NA | $\geq 40.00$ | $\leq 4.40$ |
| 1.00 | NA | $\geq 40.00$ | $\leq 4.40$ |
| 1.00 | 1  | $\geq 40.00$ | $\leq 4.40$ |
| 1.00 | NA | $\geq 40.00$ | $\leq 4.40$ |
| 1.00 | NA | $\geq 40.00$ | $\leq 4.40$ |
| 1.00 | 1  | $\geq 40.00$ | $\leq 4.40$ |
| 1.00 | 1  | $\geq 40.00$ | $\leq 4.40$ |
| 1.00 | 1  | $\geq 40.00$ | $\leq 4.40$ |
| 1.00 | 1  | $\geq 40.00$ | $\leq 4.40$ |
| 1.00 | 1  | $\geq 40.00$ | $\leq 4.40$ |
| 1.00 | NA | $\geq 40.00$ | $\leq 4.40$ |
| 1.00 | NA | $\geq 40.00$ | $\leq 4.40$ |
| 1.00 | NA | $\geq 40.00$ | $\leq 4.40$ |
| 1.00 | 1  | $\geq 40.00$ | $\leq 4.40$ |
| 1.00 | NA | $\geq 40.00$ | $\leq 4.40$ |
| 1.00 | NA | $\geq 40.00$ | $\leq 4.40$ |
| 1.00 | 1  | $\geq 40.00$ | $\leq 4.40$ |
| 1.00 | NA | $\geq 40.00$ | $\leq 4.40$ |
| 1.00 | NA | $\geq 40.00$ | $\leq 4.40$ |
| 1.00 | NA | $\geq 40.00$ | $\leq 4.40$ |
| 1.00 | NA | $\geq 40.00$ | $\leq 4.40$ |
| 1.00 | NA | $\geq 40.00$ | $\leq 4.40$ |
| 1.00 | 1  | $\geq 40.00$ | $\leq 4.40$ |
| 1.00 | NA | $\geq 40.00$ | $\leq 4.40$ |
| 1.00 | NA | $\geq 40.00$ | $\leq 4.40$ |
| 1.00 | NA | $\geq 40.00$ | $\leq 4.40$ |
| 1.00 | 1  | $\geq 40.00$ | $\leq 4.40$ |
| 1.00 | NA | $\geq 40.00$ | $\leq 4.40$ |
| 1.00 | NA | $\geq 40.00$ | $\leq 4.40$ |
| 1.00 | NA | $\geq 40.00$ | $\leq 4.40$ |

|      |      |              |             |
|------|------|--------------|-------------|
| 1.00 | NA   | $\geq 40.00$ | $\leq 4.40$ |
| 1.00 | NA   | $\geq 40.00$ | $\leq 4.40$ |
| 1.00 | NA   | $\geq 40.00$ | $\leq 4.40$ |
| 1.00 | 1    | $\geq 40.00$ | $\leq 4.40$ |
| 1.00 | NA   | $\geq 40.00$ | $\leq 4.40$ |
| 1.00 | NA   | $\geq 40.00$ | $\leq 4.40$ |
| 1.00 | NA   | $\geq 40.00$ | $\leq 4.40$ |
| 1.00 | NA   | $\geq 40.00$ | $\leq 4.40$ |
| 1.00 | NA   | $\geq 40.00$ | $\leq 4.40$ |
| 1.00 | NA   | $\geq 40.00$ | $\leq 4.40$ |
| 1.00 | 1    | $\geq 40.00$ | $\leq 4.40$ |
| 1.00 | 1    | $\geq 40.00$ | $\leq 4.40$ |
| 1.00 | NA   | $\geq 40.00$ | $\leq 4.40$ |
| 1.00 | NA   | $\geq 40.00$ | $\leq 4.40$ |
| 1.00 | NA   | $\geq 40.00$ | $\leq 4.40$ |
| 1.00 | NA   | $\geq 40.00$ | $\leq 4.40$ |
| 1.00 | 0.5  | $\geq 40.00$ | $\leq 4.40$ |
| 1.00 | NA   | $\geq 40.00$ | $\leq 4.40$ |
| 1.00 | 1    | $\geq 40.00$ | $\leq 4.40$ |
| 1.00 | NA   | $\geq 40.00$ | $\leq 4.40$ |
| 1.00 | NA   | $\geq 40.00$ | $\leq 4.40$ |
| 1.00 | NA   | $\geq 40.00$ | $\leq 4.40$ |
| 1.00 | NA   | $\geq 40.00$ | $\leq 4.40$ |
| 1.00 | NA   | $\geq 40.00$ | $\leq 4.40$ |
| 1.00 | 1    | $\geq 40.00$ | $\leq 4.40$ |
| 1.00 | 1    | $\geq 40.00$ | $\leq 4.40$ |
| 1.00 | 0.57 | $\geq 40.00$ | $\leq 4.40$ |
| 1.00 | NA   | $\geq 40.00$ | $\leq 4.40$ |
| 1.00 | NA   | $\geq 40.00$ | $\leq 4.40$ |
| 1.00 | 1    | $\geq 40.00$ | $\leq 4.40$ |
| 1.00 | NA   | $\geq 40.00$ | $\leq 4.40$ |
| 1.00 | 1    | $\geq 40.00$ | $\leq 4.40$ |
| 1.00 | NA   | $\geq 40.00$ | $\leq 4.40$ |
| 1.00 | NA   | $\geq 40.00$ | $\leq 4.40$ |
| 1.00 | 1    | $\geq 40.00$ | $\leq 4.40$ |
| 1.00 | NA   | $\geq 40.00$ | $\leq 4.40$ |
| 1.00 | 1    | $\geq 40.00$ | $\leq 4.40$ |

|      |      |         |        |
|------|------|---------|--------|
| 1.00 | NA   | ≥ 40.00 | ≤ 4.40 |
| 1.00 | NA   | ≥ 40.00 | ≤ 4.40 |
| 1.00 | 1.81 | ≥ 40.00 | ≤ 4.40 |
| 1.00 | 1    | ≥ 40.00 | ≤ 4.40 |
| 1.00 | NA   | ≥ 40.00 | ≤ 4.40 |
| 1.00 | 1    | ≥ 40.00 | ≤ 4.40 |
| 1.00 | NA   | ≥ 40.00 | ≤ 4.40 |
| 1.00 | 1    | ≥ 40.00 | ≤ 4.40 |
| 1.00 | 0.94 | ≥ 40.00 | ≤ 4.40 |
| 1.00 | 0.55 | ≥ 40.00 | ≤ 4.40 |
| 1.00 | NA   | ≥ 40.00 | ≤ 4.40 |
| 1.00 | 1    | ≥ 40.00 | ≤ 4.40 |
| 1.00 | NA   | ≥ 40.00 | ≤ 4.40 |
| 1.00 | NA   | ≥ 40.00 | ≤ 4.40 |
| 1.00 | NA   | ≥ 40.00 | ≤ 4.40 |
| 1.00 | NA   | ≥ 40.00 | ≤ 4.40 |
| 1.00 | 1    | ≥ 40.00 | ≤ 4.40 |
| 1.00 | NA   | ≥ 40.00 | ≤ 4.40 |
| 1.00 | 1    | ≥ 40.00 | ≤ 4.40 |
| 1.00 | 1    | ≥ 40.00 | ≤ 4.40 |
| 1.00 | 1    | ≥ 40.00 | ≤ 4.40 |
| 1.00 | 1    | ≥ 40.00 | ≤ 4.40 |
| 1.00 | 1    | ≥ 40.00 | ≤ 4.40 |
| 1.00 | 1    | ≥ 40.00 | ≤ 4.40 |
| 1.00 | 0.56 | ≥ 40.00 | ≤ 4.40 |
| 1.00 | NA   | ≥ 40.00 | ≤ 4.40 |
| 1.00 | 1    | ≥ 40.00 | ≤ 4.40 |
| 1.00 | 1    | ≥ 40.00 | ≤ 4.40 |
| 1.00 | 1    | ≥ 40.00 | ≤ 4.40 |
| 1.00 | 1    | ≥ 40.00 | ≤ 4.40 |
| 1.00 | 1    | ≥ 40.00 | ≤ 4.40 |
| 1.00 | 1    | ≥ 40.00 | ≤ 4.40 |
| 1.00 | NA   | ≥ 40.00 | ≤ 4.40 |
| 1.00 | NA   | ≥ 40.00 | ≤ 4.40 |
| 1.00 | NA   | ≥ 40.00 | ≤ 4.40 |
| 1.00 | 1    | ≥ 40.00 | ≤ 4.40 |
| 1.00 | NA   | ≥ 40.00 | ≤ 4.40 |
| 1.00 | NA   | ≥ 40.00 | ≤ 4.40 |
| 1.00 | NA   | ≥ 40.00 | ≤ 4.40 |
| 1.00 | NA   | ≥ 40.00 | ≤ 4.40 |
| 1.00 | 1    | ≥ 40.00 | ≤ 4.40 |
| 1.00 | NA   | ≥ 40.00 | ≤ 4.40 |
| 1.00 | NA   | ≥ 40.00 | ≤ 4.40 |

|      |      |              |             |
|------|------|--------------|-------------|
| 1.00 | NA   | $\geq 40.00$ | $\leq 4.40$ |
| 1.00 | 1    | $\geq 40.00$ | $\leq 4.40$ |
| 1.00 | NA   | $\geq 40.00$ | $\leq 4.40$ |
| 1.00 | NA   | $\geq 40.00$ | $\leq 4.40$ |
| 1.00 | NA   | $\geq 40.00$ | $\leq 4.40$ |
| 1.00 | NA   | $\geq 40.00$ | $\leq 4.40$ |
| 1.00 | 0.95 | $\geq 40.00$ | $\leq 4.40$ |
| 1.00 | NA   | $\geq 40.00$ | $\leq 4.40$ |
| 1.00 | NA   | $\geq 40.00$ | $\leq 4.40$ |
| 1.00 | NA   | $\geq 40.00$ | $\leq 4.40$ |
| 1.00 | 1    | $\geq 40.00$ | $\leq 4.40$ |
| 1.00 | 1    | $\geq 40.00$ | $\leq 4.40$ |
| 1.00 | 0.63 | $\geq 40.00$ | $\leq 4.40$ |
| 1.00 | NA   | $\geq 40.00$ | $\leq 4.40$ |
| 1.00 | 1    | $\geq 40.00$ | $\leq 4.40$ |
| 1.00 | NA   | $\geq 40.00$ | $\leq 4.40$ |
| 1.00 | NA   | $\geq 40.00$ | $\leq 4.40$ |
| 1.00 | NA   | $\geq 40.00$ | $\leq 4.40$ |
| 1.00 | NA   | $\geq 40.00$ | $\leq 4.40$ |
| 1.00 | 1    | $\geq 40.00$ | $\leq 4.40$ |
| 1.00 | NA   | $\geq 40.00$ | $\leq 4.40$ |
| 1.00 | NA   | $\geq 40.00$ | $\leq 4.40$ |
| 1.00 | NA   | $\geq 40.00$ | $\leq 4.40$ |
| 1.00 | NA   | $\geq 40.00$ | $\leq 4.40$ |
| 1.00 | NA   | $\geq 40.00$ | $\leq 4.40$ |
| 1.00 | NA   | $\geq 40.00$ | $\leq 4.40$ |
| 1.00 | NA   | $\geq 40.00$ | $\leq 4.40$ |
| 1.00 | NA   | $\geq 40.00$ | $\leq 4.40$ |
| 1.00 | NA   | $\geq 40.00$ | $\leq 4.40$ |
| 1.00 | NA   | $\geq 40.00$ | $\leq 4.40$ |
| 1.00 | NA   | $\geq 40.00$ | $\leq 4.40$ |
| 1.00 | NA   | $\geq 40.00$ | $\leq 4.40$ |
| 1.00 | 1    | $\geq 40.00$ | $\leq 4.40$ |
| 1.00 | NA   | $\geq 40.00$ | $\leq 4.40$ |
| 1.00 | NA   | $\geq 40.00$ | $\leq 4.40$ |
| 1.00 | 1    | $\geq 40.00$ | $\leq 4.40$ |
| 1.00 | 1    | $\geq 40.00$ | $\leq 4.40$ |
| 1.00 | NA   | $\geq 40.00$ | $\leq 4.40$ |



|      |      |              |             |
|------|------|--------------|-------------|
| 1.00 | 1    | $\geq 40.00$ | $\leq 4.40$ |
| 1.00 | NA   | $\geq 40.00$ | $\leq 4.40$ |
| 1.00 | NA   | $\geq 40.00$ | $\leq 4.40$ |
| 1.00 | NA   | $\geq 40.00$ | $\leq 4.40$ |
| 1.00 | NA   | $\geq 40.00$ | $\leq 4.40$ |
| 1.00 | 1    | $\geq 40.00$ | $\leq 4.40$ |
| 1.00 | 1    | $\geq 40.00$ | $\leq 4.40$ |
| 1.00 | 1    | $\geq 40.00$ | $\leq 4.40$ |
| 1.00 | NA   | $\geq 40.00$ | $\leq 4.40$ |
| 1.00 | NA   | $\geq 40.00$ | $\leq 4.40$ |
| 1.00 | 2.04 | $\geq 40.00$ | $\leq 4.40$ |
| 1.00 | 1    | $\geq 40.00$ | $\leq 4.40$ |
| 1.00 | 1    | $\geq 40.00$ | $\leq 4.40$ |
| 1.00 | NA   | $\geq 40.00$ | $\leq 4.40$ |
| 1.00 | NA   | $\geq 40.00$ | $\leq 4.40$ |
| 1.00 | NA   | $\geq 40.00$ | $\leq 4.40$ |
| 1.00 | NA   | $\geq 40.00$ | $\leq 4.40$ |
| 1.00 | NA   | $\geq 40.00$ | $\leq 4.40$ |
| 1.00 | NA   | $\geq 40.00$ | $\leq 4.40$ |
| 1.00 | NA   | $\geq 40.00$ | $\leq 4.40$ |
| 1.00 | NA   | $\geq 40.00$ | $\leq 4.40$ |
| 1.00 | 1    | $\geq 40.00$ | $\leq 4.40$ |
| 1.00 | NA   | $\geq 40.00$ | $\leq 4.40$ |
| 1.00 | NA   | $\geq 40.00$ | $\leq 4.40$ |
| 1.00 | NA   | $\geq 40.00$ | $\leq 4.40$ |
| 1.00 | NA   | $\geq 40.00$ | $\leq 4.40$ |
| 1.00 | 1    | $\geq 40.00$ | $\leq 4.40$ |
| 1.00 | 1    | $\geq 40.00$ | $\leq 4.40$ |
| 1.00 | NA   | $\geq 40.00$ | $\leq 4.40$ |
| 1.00 | 1    | $\geq 40.00$ | $\leq 4.40$ |
| 1.00 | NA   | $\geq 40.00$ | $\leq 4.40$ |
| 1.00 | NA   | $\geq 40.00$ | $\leq 4.40$ |
| 1.00 | NA   | $\geq 40.00$ | $\leq 4.40$ |
| 1.00 | NA   | $\geq 40.00$ | $\leq 4.40$ |
| 1.00 | NA   | $\geq 40.00$ | $\leq 4.40$ |
| 1.00 | 1.36 | $\geq 40.00$ | $\leq 4.40$ |
| 1.00 | NA   | $\geq 40.00$ | $\leq 4.40$ |

|      |      |              |             |
|------|------|--------------|-------------|
| 1.00 | 0.52 | $\geq 40.00$ | $\leq 4.40$ |
| 1.00 | 1    | $\geq 40.00$ | $\leq 4.40$ |
| 1.00 | 1    | $\geq 40.00$ | $\leq 4.40$ |
| 1.00 | 1    | $\geq 40.00$ | $\leq 4.40$ |
| 1.00 | NA   | $\geq 40.00$ | $\leq 4.40$ |
| 1.00 | NA   | $\geq 40.00$ | $\leq 4.40$ |
| 1.00 | 1    | $\geq 40.00$ | $\leq 4.40$ |
| 1.00 | NA   | $\geq 40.00$ | $\leq 4.40$ |
| 1.00 | 1    | $\geq 40.00$ | $\leq 4.40$ |
| 1.00 | 1    | $\geq 40.00$ | $\leq 4.40$ |
| 1.00 | NA   | $\geq 40.00$ | $\leq 4.40$ |
| 1.00 | NA   | $\geq 40.00$ | $\leq 4.40$ |
| 1.00 | NA   | $\geq 40.00$ | $\leq 4.40$ |
| 1.00 | NA   | $\geq 40.00$ | $\leq 4.40$ |
| 1.00 | NA   | $\geq 40.00$ | $\leq 4.40$ |
| 1.00 | NA   | $\geq 40.00$ | $\leq 4.40$ |
| 1.00 | NA   | $\geq 40.00$ | $\leq 4.40$ |
| 1.00 | NA   | $\geq 40.00$ | $\leq 4.40$ |
| 1.00 | 1    | $\geq 40.00$ | $\leq 4.40$ |
| 1.00 | NA   | $\geq 40.00$ | $\leq 4.40$ |
| 1.00 | NA   | $\geq 40.00$ | $\leq 4.40$ |
| 1.00 | NA   | $\geq 40.00$ | $\leq 4.40$ |
| 1.00 | NA   | $\geq 40.00$ | $\leq 4.40$ |
| 1.00 | 1    | $\geq 40.00$ | $\leq 4.40$ |
| 1.00 | 1    | $\geq 40.00$ | $\leq 4.40$ |
| 1.00 | 1    | $\geq 40.00$ | $\leq 4.40$ |
| 1.00 | 1    | $\geq 40.00$ | $\leq 4.40$ |
| 1.00 | NA   | $\geq 40.00$ | $\leq 4.40$ |
| 1.00 | 1    | $\geq 40.00$ | $\leq 4.40$ |
| 1.00 | NA   | $\geq 40.00$ | $\leq 4.40$ |
| 1.00 | NA   | $\geq 40.00$ | $\leq 4.40$ |
| 1.00 | 1    | $\geq 40.00$ | $\leq 4.40$ |
| 1.00 | 1    | $\geq 40.00$ | $\leq 4.40$ |
| 1.00 | NA   | $\geq 40.00$ | $\leq 4.40$ |
| 1.00 | 1    | $\geq 40.00$ | $\leq 4.40$ |
| 1.00 | NA   | $\geq 40.00$ | $\leq 4.40$ |
| 1.00 | 1    | $\geq 40.00$ | $\leq 4.40$ |
| 1.00 | NA   | $\geq 40.00$ | $\leq 4.40$ |



|      |      |         |        |
|------|------|---------|--------|
| 1.00 | 1    | ≥ 40.00 | ≤ 4.40 |
| 1.00 | NA   | ≥ 40.00 | ≤ 4.40 |
| 1.00 | 1    | ≥ 40.00 | ≤ 4.40 |
| 1.00 | NA   | ≥ 40.00 | ≤ 4.40 |
| 1.00 | 1.65 | ≥ 40.00 | ≤ 4.40 |
| 1.00 | NA   | ≥ 40.00 | ≤ 4.40 |
| 1.00 | NA   | ≥ 40.00 | ≤ 4.40 |
| 1.00 | NA   | ≥ 40.00 | ≤ 4.40 |
| 1.00 | NA   | ≥ 40.00 | ≤ 4.40 |
| 1.00 | 1    | ≥ 40.00 | ≤ 4.40 |
| 1.00 | 1.05 | ≥ 40.00 | ≤ 4.40 |
| 1.00 | NA   | ≥ 40.00 | ≤ 4.40 |
| 1.00 | 1    | ≥ 40.00 | ≤ 4.40 |
| 1.00 | NA   | ≥ 40.00 | ≤ 4.40 |
| 1.00 | 2.37 | ≥ 40.00 | ≤ 4.40 |
| 1.00 | NA   | ≥ 40.00 | ≤ 4.40 |
| 1.00 | NA   | ≥ 40.00 | ≤ 4.40 |
| 1.00 | NA   | ≥ 40.00 | ≤ 4.40 |
| 1.00 | NA   | ≥ 40.00 | ≤ 4.40 |
| 1.00 | NA   | ≥ 40.00 | ≤ 4.40 |
| 1.00 | NA   | ≥ 40.00 | ≤ 4.40 |
| 1.00 | 1    | ≥ 40.00 | ≤ 4.40 |
| 1.00 | 1    | ≥ 40.00 | ≤ 4.40 |
| 1.00 | 1    | ≥ 40.00 | ≤ 4.40 |
| 1.00 | NA   | ≥ 40.00 | ≤ 4.40 |
| 1.00 | NA   | ≥ 40.00 | ≤ 4.40 |
| 1.00 | 1    | ≥ 40.00 | ≤ 4.40 |
| 1.00 | 2.45 | ≥ 40.00 | ≤ 4.40 |
| 1.00 | 1    | ≥ 40.00 | ≤ 4.40 |
| 1.00 | NA   | ≥ 40.00 | ≤ 4.40 |
| 1.00 | NA   | ≥ 40.00 | ≤ 4.40 |
| 1.00 | NA   | ≥ 40.00 | ≤ 4.40 |
| 1.00 | 1    | ≥ 40.00 | ≤ 4.40 |
| 1.00 | 1    | ≥ 40.00 | ≤ 4.40 |
| 1.00 | 1    | ≥ 40.00 | ≤ 4.40 |
| 1.00 | NA   | ≥ 40.00 | ≤ 4.40 |
| 1.00 | 1    | ≥ 40.00 | ≤ 4.40 |
| 1.00 | 1    | ≥ 40.00 | ≤ 4.40 |
| 1.00 | NA   | ≥ 40.00 | ≤ 4.40 |
| 1.00 | NA   | ≥ 40.00 | ≤ 4.40 |
| 1.00 | 1    | ≥ 40.00 | ≤ 4.40 |

|      |      |              |             |
|------|------|--------------|-------------|
| 1.00 | 1    | $\geq 40.00$ | $\leq 4.40$ |
| 1.00 | NA   | $\geq 40.00$ | $\leq 4.40$ |
| 1.00 | 1    | $\geq 40.00$ | $\leq 4.40$ |
| 1.00 | NA   | $\geq 40.00$ | $\leq 4.40$ |
| 1.00 | 1    | $\geq 40.00$ | $\leq 4.40$ |
| 1.00 | NA   | $\geq 40.00$ | $\leq 4.40$ |
| 1.00 | 1    | $\geq 40.00$ | $\leq 4.40$ |
| 1.00 | NA   | $\geq 40.00$ | $\leq 4.40$ |
| 1.00 | NA   | $\geq 40.00$ | $\leq 4.40$ |
| 1.00 | 1    | $\geq 40.00$ | $\leq 4.40$ |
| 1.00 | NA   | $\geq 40.00$ | $\leq 4.40$ |
| 1.00 | 1    | $\geq 40.00$ | $\leq 4.40$ |
| 1.00 | 1    | $\geq 40.00$ | $\leq 4.40$ |
| 1.00 | 1    | $\geq 40.00$ | $\leq 4.40$ |
| 1.00 | NA   | $\geq 40.00$ | $\leq 4.40$ |
| 1.00 | NA   | $\geq 40.00$ | $\leq 4.40$ |
| 1.00 | NA   | $\geq 40.00$ | $\leq 4.40$ |
| 1.00 | 1    | $\geq 40.00$ | $\leq 4.40$ |
| 1.00 | NA   | $\geq 40.00$ | $\leq 4.40$ |
| 1.00 | NA   | $\geq 40.00$ | $\leq 4.40$ |
| 1.00 | NA   | $\geq 40.00$ | $\leq 4.40$ |
| 1.00 | NA   | $\geq 40.00$ | $\leq 4.40$ |
| 1.00 | NA   | $\geq 40.00$ | $\leq 4.40$ |
| 1.00 | 0.73 | $\geq 40.00$ | $\leq 4.40$ |
| 1.00 | NA   | $\geq 40.00$ | $\leq 4.40$ |
| 1.00 | NA   | $\geq 40.00$ | $\leq 4.40$ |
| 1.00 | NA   | $\geq 40.00$ | $\leq 4.40$ |
| 1.00 | 1    | $\geq 40.00$ | $\leq 4.40$ |
| 1.00 | NA   | $\geq 40.00$ | $\leq 4.40$ |
| 1.00 | NA   | $\geq 40.00$ | $\leq 4.40$ |
| 1.00 | NA   | $\geq 40.00$ | $\leq 4.40$ |
| 1.00 | NA   | $\geq 40.00$ | $\leq 4.40$ |
| 1.00 | 1    | $\geq 40.00$ | $\leq 4.40$ |
| 1.00 | NA   | $\geq 40.00$ | $\leq 4.40$ |
| 1.00 | 1.23 | $\geq 40.00$ | $\leq 4.40$ |
| 1.00 | NA   | $\geq 40.00$ | $\leq 4.40$ |
| 1.00 | 1    | $\geq 40.00$ | $\leq 4.40$ |
| 1.00 | NA   | $\geq 40.00$ | $\leq 4.40$ |
| 1.00 | NA   | $\geq 40.00$ | $\leq 4.40$ |
| 1.00 | NA   | $\geq 40.00$ | $\leq 4.40$ |
| 1.00 | 1    | $\geq 40.00$ | $\leq 4.40$ |

|      |      |              |             |
|------|------|--------------|-------------|
| 1.00 | NA   | $\geq 40.00$ | $\leq 4.40$ |
| 1.00 | NA   | $\geq 40.00$ | $\leq 4.40$ |
| 1.00 | 1    | $\geq 40.00$ | $\leq 4.40$ |
| 1.00 | NA   | $\geq 40.00$ | $\leq 4.40$ |
| 1.00 | NA   | $\geq 40.00$ | $\leq 4.40$ |
| 1.00 | NA   | $\geq 40.00$ | $\leq 4.40$ |
| 1.00 | 1    | $\geq 40.00$ | $\leq 4.40$ |
| 1.00 | 1.53 | $\geq 40.00$ | $\leq 4.40$ |
| 1.00 | NA   | $\geq 40.00$ | $\leq 4.40$ |
| 1.00 | 1    | $\geq 40.00$ | $\leq 4.40$ |
| 1.00 | NA   | $\geq 40.00$ | $\leq 4.40$ |
| 1.00 | 1    | $\geq 40.00$ | $\leq 4.40$ |
| 1.00 | 2.48 | $\geq 40.00$ | $\leq 4.40$ |
| 1.00 | NA   | $\geq 40.00$ | $\leq 4.40$ |
| 1.00 | 1    | $\geq 40.00$ | $\leq 4.40$ |
| 1.00 | 1    | $\geq 40.00$ | $\leq 4.40$ |
| 1.00 | NA   | $\geq 40.00$ | $\leq 4.40$ |
| 1.00 | 1    | $\geq 40.00$ | $\leq 4.40$ |
| 1.00 | 1    | $\geq 40.00$ | $\leq 4.40$ |
| 1.00 | 1    | $\geq 40.00$ | $\leq 4.40$ |
| 1.00 | 1    | $\geq 40.00$ | $\leq 4.40$ |
| 1.00 | NA   | $\geq 40.00$ | $\leq 4.40$ |
| 1.00 | 1    | $\geq 40.00$ | $\leq 4.40$ |
| 1.00 | NA   | $\geq 40.00$ | $\leq 4.40$ |
| 1.00 | NA   | $\geq 40.00$ | $\leq 4.40$ |
| 1.00 | NA   | $\geq 40.00$ | $\leq 4.40$ |
| 1.00 | 1    | $\geq 40.00$ | $\leq 4.40$ |
| 1.00 | 1    | $\geq 40.00$ | $\leq 4.40$ |
| 1.00 | 1    | $\geq 40.00$ | $\leq 4.40$ |
| 1.00 | NA   | $\geq 40.00$ | $\leq 4.40$ |
| 1.00 | NA   | $\geq 40.00$ | $\leq 4.40$ |
| 1.00 | NA   | $\geq 40.00$ | $\leq 4.40$ |
| 1.00 | 1    | $\geq 40.00$ | $\leq 4.40$ |
| 1.00 | NA   | $\geq 40.00$ | $\leq 4.40$ |
| 1.00 | NA   | $\geq 40.00$ | $\leq 4.40$ |
| 1.00 | 1    | $\geq 40.00$ | $\leq 4.40$ |
| 1.00 | NA   | $\geq 40.00$ | $\leq 4.40$ |
| 1.00 | NA   | $\geq 40.00$ | $\leq 4.40$ |
| 1.00 | 1    | $\geq 40.00$ | $\leq 4.40$ |
| 1.00 | 1    | $\geq 40.00$ | $\leq 4.40$ |

|      |      |              |             |
|------|------|--------------|-------------|
| 1.00 | NA   | $\geq 40.00$ | $\leq 4.40$ |
| 1.00 | NA   | $\geq 40.00$ | $\leq 4.40$ |
| 1.00 | NA   | $\geq 40.00$ | $\leq 4.40$ |
| 1.00 | NA   | $\geq 40.00$ | $\leq 4.40$ |
| 1.00 | 1    | $\geq 40.00$ | $\leq 4.40$ |
| 1.00 | NA   | $\geq 40.00$ | $\leq 4.40$ |
| 1.00 | NA   | $\geq 40.00$ | $\leq 4.40$ |
| 1.00 | NA   | $\geq 40.00$ | $\leq 4.40$ |
| 1.00 | 1    | $\geq 40.00$ | $\leq 4.40$ |
| 1.00 | NA   | $\geq 40.00$ | $\leq 4.40$ |
| 1.00 | NA   | $\geq 40.00$ | $\leq 4.40$ |
| 1.00 | NA   | $\geq 40.00$ | $\leq 4.40$ |
| 1.00 | 1.79 | $\geq 40.00$ | $\leq 4.40$ |
| 1.00 | 1    | $\geq 40.00$ | $\leq 4.40$ |
| 1.00 | NA   | $\geq 40.00$ | $\leq 4.40$ |
| 1.00 | 0.96 | $\geq 40.00$ | $\leq 4.40$ |
| 1.00 | NA   | $\geq 40.00$ | $\leq 4.40$ |
| 1.00 | 1    | $\geq 40.00$ | $\leq 4.40$ |
| 1.00 | 1    | $\geq 40.00$ | $\leq 4.40$ |
| 1.00 | NA   | $\geq 40.00$ | $\leq 4.40$ |
| 1.00 | NA   | $\geq 40.00$ | $\leq 4.40$ |
| 1.00 | NA   | $\geq 40.00$ | $\leq 4.40$ |
| 1.00 | 1    | $\geq 40.00$ | $\leq 4.40$ |
| 1.00 | NA   | $\geq 40.00$ | $\leq 4.40$ |
| 1.00 | NA   | $\geq 40.00$ | $\leq 4.40$ |
| 1.00 | NA   | $\geq 40.00$ | $\leq 4.40$ |
| 1.00 | 0.6  | $\geq 40.00$ | $\leq 4.40$ |
| 1.00 | NA   | $\geq 40.00$ | $\leq 4.40$ |
| 1.00 | 1    | $\geq 40.00$ | $\leq 4.40$ |
| 1.00 | 1    | $\geq 40.00$ | $\leq 4.40$ |
| 1.00 | NA   | $\geq 40.00$ | $\leq 4.40$ |
| 1.00 | NA   | $\geq 40.00$ | $\leq 4.40$ |
| 1.00 | 1    | $\geq 40.00$ | $\leq 4.40$ |
| 1.00 | 1    | $\geq 40.00$ | $\leq 4.40$ |
| 1.00 | NA   | $\geq 40.00$ | $\leq 4.40$ |
| 1.00 | 1    | $\geq 40.00$ | $\leq 4.40$ |
| 1.00 | NA   | $\geq 40.00$ | $\leq 4.40$ |
| 1.00 | NA   | $\geq 40.00$ | $\leq 4.40$ |
| 1.00 | NA   | $\geq 40.00$ | $\leq 4.40$ |

|      |      |              |             |
|------|------|--------------|-------------|
| 1.00 | NA   | $\geq 40.00$ | $\leq 4.40$ |
| 1.00 | 1    | $\geq 40.00$ | $\leq 4.40$ |
| 1.00 | NA   | $\geq 40.00$ | $\leq 4.40$ |
| 1.00 | NA   | $\geq 40.00$ | $\leq 4.40$ |
| 1.00 | 1    | $\geq 40.00$ | $\leq 4.40$ |
| 1.00 | NA   | $\geq 40.00$ | $\leq 4.40$ |
| 1.00 | NA   | $\geq 40.00$ | $\leq 4.40$ |
| 1.00 | 1    | $\geq 40.00$ | $\leq 4.40$ |
| 1.00 | NA   | $\geq 40.00$ | $\leq 4.40$ |
| 1.00 | 1    | $\geq 40.00$ | $\leq 4.40$ |
| 1.00 | NA   | $\geq 40.00$ | $\leq 4.40$ |
| 1.00 | NA   | $\geq 40.00$ | $\leq 4.40$ |
| 1.00 | NA   | $\geq 40.00$ | $\leq 4.40$ |
| 1.00 | NA   | $\geq 40.00$ | $\leq 4.40$ |
| 1.00 | NA   | $\geq 40.00$ | $\leq 4.40$ |
| 1.00 | NA   | $\geq 40.00$ | $\leq 4.40$ |
| 1.00 | 1    | $\geq 40.00$ | $\leq 4.40$ |
| 1.00 | NA   | $\geq 40.00$ | $\leq 4.40$ |
| 1.00 | 1    | $\geq 40.00$ | $\leq 4.40$ |
| 1.00 | 1.11 | $\geq 40.00$ | $\leq 4.40$ |
| 1.00 | NA   | $\geq 40.00$ | $\leq 4.40$ |
| 1.00 | 1    | $\geq 40.00$ | $\leq 4.40$ |
| 1.00 | NA   | $\geq 40.00$ | $\leq 4.40$ |
| 1.00 | NA   | $\geq 40.00$ | $\leq 4.40$ |
| 1.00 | NA   | $\geq 40.00$ | $\leq 4.40$ |
| 1.00 | NA   | $\geq 40.00$ | $\leq 4.40$ |
| 1.00 | NA   | $\geq 40.00$ | $\leq 4.40$ |
| 1.00 | NA   | $\geq 40.00$ | $\leq 4.40$ |
| 1.00 | 1    | $\geq 40.00$ | $\leq 4.40$ |
| 1.00 | NA   | $\geq 40.00$ | $\leq 4.40$ |
| 1.00 | NA   | $\geq 40.00$ | $\leq 4.40$ |
| 1.00 | NA   | $\geq 40.00$ | $\leq 4.40$ |
| 1.00 | NA   | $\geq 40.00$ | $\leq 4.40$ |
| 1.00 | NA   | $\geq 40.00$ | $\leq 4.40$ |
| 1.00 | NA   | $\geq 40.00$ | $\leq 4.40$ |
| 1.00 | 1    | $\geq 40.00$ | $\leq 4.40$ |



|      |      |         |        |
|------|------|---------|--------|
| 1.00 | NA   | ≥ 40.00 | ≤ 4.40 |
| 1.00 | NA   | ≥ 40.00 | ≤ 4.40 |
| 1.00 | 1    | ≥ 40.00 | ≤ 4.40 |
| 1.00 | 0.96 | ≥ 40.00 | ≤ 4.40 |
| 1.00 | NA   | ≥ 40.00 | ≤ 4.40 |
| 1.00 | NA   | ≥ 40.00 | ≤ 4.40 |
| 1.00 | NA   | ≥ 40.00 | ≤ 4.40 |
| 1.00 | 2.37 | ≥ 40.00 | ≤ 4.40 |
| 1.00 | NA   | ≥ 40.00 | ≤ 4.40 |
| 1.00 | NA   | ≥ 40.00 | ≤ 4.40 |
| 1.00 | NA   | ≥ 40.00 | ≤ 4.40 |
| 1.00 | NA   | ≥ 40.00 | ≤ 4.40 |
| 1.00 | NA   | ≥ 40.00 | ≤ 4.40 |
| 1.00 | NA   | ≥ 40.00 | ≤ 4.40 |
| 1.00 | NA   | ≥ 40.00 | ≤ 4.40 |
| 1.00 | 1    | ≥ 40.00 | ≤ 4.40 |
| 1.00 | 1    | ≥ 40.00 | ≤ 4.40 |
| 1.00 | NA   | ≥ 40.00 | ≤ 4.40 |
| 1.00 | 1.44 | ≥ 40.00 | ≤ 4.40 |
| 1.00 | NA   | ≥ 40.00 | ≤ 4.40 |
| 1.00 | 1    | ≥ 40.00 | ≤ 4.40 |
| 1.00 | NA   | ≥ 40.00 | ≤ 4.40 |
| 1.00 | NA   | ≥ 40.00 | ≤ 4.40 |
| 1.00 | NA   | ≥ 40.00 | ≤ 4.40 |
| 1.00 | NA   | ≥ 40.00 | ≤ 4.40 |
| 1.00 | NA   | ≥ 40.00 | ≤ 4.40 |
| 1.00 | 1    | ≥ 40.00 | ≤ 4.40 |
| 1.00 | NA   | ≥ 40.00 | ≤ 4.40 |
| 1.00 | NA   | ≥ 40.00 | ≤ 4.40 |
| 1.00 | 1    | ≥ 40.00 | ≤ 4.40 |
| 1.00 | NA   | ≥ 40.00 | ≤ 4.40 |
| 1.00 | NA   | ≥ 40.00 | ≤ 4.40 |
| 1.00 | 1    | ≥ 40.00 | ≤ 4.40 |
| 1.00 | NA   | ≥ 40.00 | ≤ 4.40 |
| 1.00 | NA   | ≥ 40.00 | ≤ 4.40 |
| 1.00 | 1    | ≥ 40.00 | ≤ 4.40 |
| 1.00 | 1    | ≥ 40.00 | ≤ 4.40 |

|      |    |              |             |
|------|----|--------------|-------------|
| 1.00 | NA | $\geq 40.00$ | $\leq 4.40$ |
| 1.00 | 1  | $\geq 40.00$ | $\leq 4.40$ |
| 1.00 | NA | $\geq 40.00$ | $\leq 4.40$ |
| 1.00 | 1  | $\geq 40.00$ | $\leq 4.40$ |
| 1.00 | NA | $\geq 40.00$ | $\leq 4.40$ |
| 1.00 | NA | $\geq 40.00$ | $\leq 4.40$ |
| 1.00 | NA | $\geq 40.00$ | $\leq 4.40$ |
| 1.00 | NA | $\geq 40.00$ | $\leq 4.40$ |
| 1.00 | NA | $\geq 40.00$ | $\leq 4.40$ |
| 1.00 | NA | $\geq 40.00$ | $\leq 4.40$ |
| 1.00 | 1  | $\geq 40.00$ | $\leq 4.40$ |
| 1.00 | NA | $\geq 40.00$ | $\leq 4.40$ |
| 1.00 | NA | $\geq 40.00$ | $\leq 4.40$ |
| 1.00 | 1  | $\geq 40.00$ | $\leq 4.40$ |
| 1.00 | NA | $\geq 40.00$ | $\leq 4.40$ |
| 1.00 | NA | $\geq 40.00$ | $\leq 4.40$ |
| 1.00 | 1  | $\geq 40.00$ | $\leq 4.40$ |
| 1.00 | 1  | $\geq 40.00$ | $\leq 4.40$ |
| 1.00 | 1  | $\geq 40.00$ | $\leq 4.40$ |
| 1.00 | 1  | $\geq 40.00$ | $\leq 4.40$ |
| 1.00 | 1  | $\geq 40.00$ | $\leq 4.40$ |
| 1.00 | NA | $\geq 40.00$ | $\leq 4.40$ |
| 1.00 | NA | $\geq 40.00$ | $\leq 4.40$ |
| 1.00 | 1  | $\geq 40.00$ | $\leq 4.40$ |
| 1.00 | NA | $\geq 40.00$ | $\leq 4.40$ |
| 1.00 | NA | $\geq 40.00$ | $\leq 4.40$ |
| 1.00 | 1  | $\geq 40.00$ | $\leq 4.40$ |
| 1.00 | NA | $\geq 40.00$ | $\leq 4.40$ |
| 1.00 | 1  | $\geq 40.00$ | $\leq 4.40$ |
| 1.00 | 1  | $\geq 40.00$ | $\leq 4.40$ |
| 1.00 | NA | $\geq 40.00$ | $\leq 4.40$ |
| 1.00 | NA | $\geq 40.00$ | $\leq 4.40$ |
| 1.00 | NA | $\geq 40.00$ | $\leq 4.40$ |
| 1.00 | 1  | $\geq 40.00$ | $\leq 4.40$ |
| 1.00 | NA | $\geq 40.00$ | $\leq 4.40$ |
| 1.00 | 1  | $\geq 40.00$ | $\leq 4.40$ |
| 1.00 | NA | $\geq 40.00$ | $\leq 4.40$ |
| 1.00 | NA | $\geq 40.00$ | $\leq 4.40$ |
| 1.00 | NA | $\geq 40.00$ | $\leq 4.40$ |







|      |    |              |             |
|------|----|--------------|-------------|
| 1.00 | 1  | $\geq 40.00$ | $\leq 4.40$ |
| 1.00 | 1  | $\geq 40.00$ | $\leq 4.40$ |
| 1.00 | 1  | $\geq 40.00$ | $\leq 4.40$ |
| 1.00 | 1  | $\geq 40.00$ | $\leq 4.40$ |
| 1.00 | 1  | $\geq 40.00$ | $\leq 4.40$ |
| 1.00 | NA | $\geq 40.00$ | $\leq 4.40$ |
| 1.00 | 1  | $\geq 40.00$ | $\leq 4.40$ |
| 1.00 | 1  | $\geq 40.00$ | $\leq 4.40$ |
| 1.00 | NA | $\geq 40.00$ | $\leq 4.40$ |
| 1.00 | NA | $\geq 40.00$ | $\leq 4.40$ |
| 1.00 | 1  | $\geq 40.00$ | $\leq 4.40$ |
| 1.00 | NA | $\geq 40.00$ | $\leq 4.40$ |
| 1.00 | 1  | $\geq 40.00$ | $\leq 4.40$ |
| 1.00 | 1  | $\geq 40.00$ | $\leq 4.40$ |
| 1.00 | NA | $\geq 40.00$ | $\leq 4.40$ |
| 1.00 | NA | $\geq 40.00$ | $\leq 4.40$ |
| 1.00 | 1  | $\geq 40.00$ | $\leq 4.40$ |
| 1.00 | 1  | $\geq 40.00$ | $\leq 4.40$ |
| 1.00 | NA | $\geq 40.00$ | $\leq 4.40$ |
| 1.00 | 1  | $\geq 40.00$ | $\leq 4.40$ |
| 1.00 | NA | $\geq 40.00$ | $\leq 4.40$ |
| 1.00 | NA | $\geq 40.00$ | $\leq 4.40$ |
| 1.00 | NA | $\geq 40.00$ | $\leq 4.40$ |
| 1.00 | 1  | $\geq 40.00$ | $\leq 4.40$ |
| 1.00 | 1  | $\geq 40.00$ | $\leq 4.40$ |
| 1.00 | NA | $\geq 40.00$ | $\leq 4.40$ |
| 1.00 | 1  | $\geq 40.00$ | $\leq 4.40$ |
| 1.00 | NA | $\geq 40.00$ | $\leq 4.40$ |
| 1.00 | NA | $\geq 40.00$ | $\leq 4.40$ |
| 1.00 | NA | $\geq 40.00$ | $\leq 4.40$ |
| 1.00 | NA | $\geq 40.00$ | $\leq 4.40$ |
| 1.00 | NA | $\geq 40.00$ | $\leq 4.40$ |
| 1.00 | 1  | $\geq 40.00$ | $\leq 4.40$ |
| 1.00 | 1  | $\geq 40.00$ | $\leq 4.40$ |
| 1.00 | NA | $\geq 40.00$ | $\leq 4.40$ |
| 1.00 | NA | $\geq 40.00$ | $\leq 4.40$ |
| 1.00 | NA | $\geq 40.00$ | $\leq 4.40$ |
| 1.00 | NA | $\geq 40.00$ | $\leq 4.40$ |
| 1.00 | NA | $\geq 40.00$ | $\leq 4.40$ |
| 1.00 | NA | $\geq 40.00$ | $\leq 4.40$ |
| 1.00 | NA | $\geq 40.00$ | $\leq 4.40$ |
| 1.00 | 1  | $\geq 40.00$ | $\leq 4.40$ |

|      |      |              |             |
|------|------|--------------|-------------|
| 1.00 | 1    | $\geq 40.00$ | $\leq 4.40$ |
| 1.00 | 1    | $\geq 40.00$ | $\leq 4.40$ |
| 1.00 | NA   | $\geq 40.00$ | $\leq 4.40$ |
| 1.00 | 1    | $\geq 40.00$ | $\leq 4.40$ |
| 1.00 | NA   | $\geq 40.00$ | $\leq 4.40$ |
| 1.00 | 1    | $\geq 40.00$ | $\leq 4.40$ |
| 1.00 | 1    | $\geq 40.00$ | $\leq 4.40$ |
| 1.00 | 1    | $\geq 40.00$ | $\leq 4.40$ |
| 1.00 | 1    | $\geq 40.00$ | $\leq 4.40$ |
| 1.00 | NA   | $\geq 40.00$ | $\leq 4.40$ |
| 1.00 | NA   | $\geq 40.00$ | $\leq 4.40$ |
| 1.00 | NA   | $\geq 40.00$ | $\leq 4.40$ |
| 1.00 | 1    | $\geq 40.00$ | $\leq 4.40$ |
| 1.00 | 1    | $\geq 40.00$ | $\leq 4.40$ |
| 1.00 | NA   | $\geq 40.00$ | $\leq 4.40$ |
| 1.00 | 1    | $\geq 40.00$ | $\leq 4.40$ |
| 1.00 | NA   | $\geq 40.00$ | $\leq 4.40$ |
| 1.00 | NA   | $\geq 40.00$ | $\leq 4.40$ |
| 1.00 | 1.66 | $\geq 40.00$ | $\leq 4.40$ |
| 1.00 | NA   | $\geq 40.00$ | $\leq 4.40$ |
| 1.00 | NA   | $\geq 40.00$ | $\leq 4.40$ |
| 1.00 | 1    | $\geq 40.00$ | $\leq 4.40$ |
| 1.00 | 1    | $\geq 40.00$ | $\leq 4.40$ |
| 1.00 | 1    | $\geq 40.00$ | $\leq 4.40$ |
| 1.00 | 1.07 | $\geq 40.00$ | $\leq 4.40$ |
| 1.00 | NA   | $\geq 40.00$ | $\leq 4.40$ |
| 1.00 | 1    | $\geq 40.00$ | $\leq 4.40$ |
| 1.00 | 1    | $\geq 40.00$ | $\leq 4.40$ |
| 1.00 | NA   | $\geq 40.00$ | $\leq 4.40$ |
| 1.00 | NA   | $\geq 40.00$ | $\leq 4.40$ |
| 1.00 | 1    | $\geq 40.00$ | $\leq 4.40$ |
| 1.00 | NA   | $\geq 40.00$ | $\leq 4.40$ |
| 1.00 | 1.77 | $\geq 40.00$ | $\leq 4.40$ |
| 1.00 | 1    | $\geq 40.00$ | $\leq 4.40$ |
| 1.00 | NA   | $\geq 40.00$ | $\leq 4.40$ |
| 1.00 | NA   | $\geq 40.00$ | $\leq 4.40$ |
| 1.00 | NA   | $\geq 40.00$ | $\leq 4.40$ |
| 1.00 | NA   | $\geq 40.00$ | $\leq 4.40$ |
| 1.00 | NA   | $\geq 40.00$ | $\leq 4.40$ |
| 1.00 | 1    | $\geq 40.00$ | $\leq 4.40$ |
| 1.00 | 0.51 | $\geq 40.00$ | $\leq 4.40$ |

|      |      |              |             |
|------|------|--------------|-------------|
| 1.00 | 1    | $\geq 40.00$ | $\leq 4.40$ |
| 1.00 | NA   | $\geq 40.00$ | $\leq 4.40$ |
| 1.00 | 1    | $\geq 40.00$ | $\leq 4.40$ |
| 1.00 | 1    | $\geq 40.00$ | $\leq 4.40$ |
| 1.00 | 1    | $\geq 40.00$ | $\leq 4.40$ |
| 1.00 | NA   | $\geq 40.00$ | $\leq 4.40$ |
| 1.00 | NA   | $\geq 40.00$ | $\leq 4.40$ |
| 1.00 | 1    | $\geq 40.00$ | $\leq 4.40$ |
| 1.00 | 1    | $\geq 40.00$ | $\leq 4.40$ |
| 1.00 | 1    | $\geq 40.00$ | $\leq 4.40$ |
| 1.00 | 1.27 | $\geq 40.00$ | $\leq 4.40$ |
| 1.00 | NA   | $\geq 40.00$ | $\leq 4.40$ |
| 1.00 | NA   | $\geq 40.00$ | $\leq 4.40$ |
| 1.00 | 1    | $\geq 40.00$ | $\leq 4.40$ |
| 1.00 | NA   | $\geq 40.00$ | $\leq 4.40$ |
| 1.00 | NA   | $\geq 40.00$ | $\leq 4.40$ |
| 1.00 | 1.83 | $\geq 40.00$ | $\leq 4.40$ |
| 1.00 | 1    | $\geq 40.00$ | $\leq 4.40$ |
| 1.00 | 1    | $\geq 40.00$ | $\leq 4.40$ |
| 1.00 | 1    | $\geq 40.00$ | $\leq 4.40$ |
| 1.00 | NA   | $\geq 40.00$ | $\leq 4.40$ |
| 1.00 | NA   | $\geq 40.00$ | $\leq 4.40$ |
| 1.00 | 1.85 | $\geq 40.00$ | $\leq 4.40$ |
| 1.00 | NA   | $\geq 40.00$ | $\leq 4.40$ |
| 1.00 | NA   | $\geq 40.00$ | $\leq 4.40$ |
| 1.00 | 1.12 | $\geq 40.00$ | $\leq 4.40$ |
| 1.00 | NA   | $\geq 40.00$ | $\leq 4.40$ |
| 1.00 | NA   | $\geq 40.00$ | $\leq 4.40$ |
| 1.00 | NA   | $\geq 40.00$ | $\leq 4.40$ |
| 1.00 | 1    | $\geq 40.00$ | $\leq 4.40$ |
| 1.00 | 0.82 | $\geq 40.00$ | $\leq 4.40$ |
| 1.00 | NA   | $\geq 40.00$ | $\leq 4.40$ |
| 1.00 | 1.26 | $\geq 40.00$ | $\leq 4.40$ |
| 1.00 | 1    | $\geq 40.00$ | $\leq 4.40$ |
| 1.00 | 1    | $\geq 40.00$ | $\leq 4.40$ |
| 1.00 | 1    | $\geq 40.00$ | $\leq 4.40$ |
| 1.00 | NA   | $\geq 40.00$ | $\leq 4.40$ |
| 1.00 | 1    | $\geq 40.00$ | $\leq 4.40$ |
| 1.00 | NA   | $\geq 40.00$ | $\leq 4.40$ |
| 1.00 | NA   | $\geq 40.00$ | $\leq 4.40$ |



|      |    |              |             |
|------|----|--------------|-------------|
| 1.00 | NA | $\geq 40.00$ | $\leq 4.40$ |
|------|----|--------------|-------------|

**Table S10.** Data collection and refinement statistics.

|                              | Compound 1                 | Compound 6                 |
|------------------------------|----------------------------|----------------------------|
| Beamline                     | i03                        | i04                        |
| Wavelength (Å)               | 0.9200 Å                   | 0.9795 Å                   |
| Resolution range (Å)         | 61.37 - 1.37 (1.44 - 1.37) | 44.63 - 1.64 (1.68 - 1.64) |
| Space group                  | I 4                        | I 4                        |
| Unit cell                    | 88.7 88.7 85.0 90 90 90    | 89.3 89.3 84.8 90 90 90    |
| Total reflections            | 589436 (75978)             | 298573 (23295)             |
| Unique reflections           | 68980 (9175)               | 40582 (3014)               |
| Multiplicity                 | 8.5 (8.3)                  | 7.4 (7.7)                  |
| Completeness (%)             | 100.0 (100.0)              | 99.7 (99.9)                |
| Mean I/sigma(I)              | 9.2 (1.6)                  | 8.9 (1.2)                  |
| Wilson B-factor              | 13.78                      | 26.23                      |
| R-merge                      | 0.104 (1.90)               | 0.101 (1.27)               |
| R-meas                       | 0.115 (2.20)               | 0.122 (1.45)               |
| CC1/2                        | 0.998 (0.633)              | 0.996 (0.544)              |
| R-work                       | 0.20 (0.33)                | 0.19 (0.28)                |
| R-free                       | 0.21 (0.33)                | 0.20 (0.29)                |
| Number of non-hydrogen atoms | 2705                       | 2581                       |
| macromolecules               | 2313                       | 2304                       |
| ligands                      | 43                         | 53                         |
| water                        | 349                        | 224                        |
| Protein residues             | 330                        | 332                        |
| RMS(bonds)                   | 0.009                      | 0.011                      |
| RMS(angles)                  | 1.16                       | 1.21                       |
| Ramachandran favored (%)     | 98                         | 97                         |
| Ramachandran outliers (%)    | 0                          | 0                          |
| Clashscore                   | 2.75                       | 9.14                       |
| Average B-factor             | 19.5                       | 33.3                       |
| macromolecules               | 17.9                       | 32.5                       |
| ligands                      | 16.6                       | 35.1                       |
| solvent                      | 30.9                       | 40.8                       |

Statistics for the highest-resolution shell are shown in parentheses.
